# Supplementary material for: The role of RNA in the maintenance of chromatin domains as revealed by antibody-mediated proximity labelling coupled to mass spectrometry
Source: eLife journal article supplement (doi:10.7554/elife.95718), 2024-05-08

Figure 2-Supplement Figure 2(a)-source data  
(Chemiluminescence)

|   |   |   |   |               |
|---|---|---|---|---------------|
| + | + | + | - | H2O2          |
| + | + | - | + | Biotin phenol |
| + | - | - | - | CID antibody  |
| + | + | + | + | pA-Apex2      |

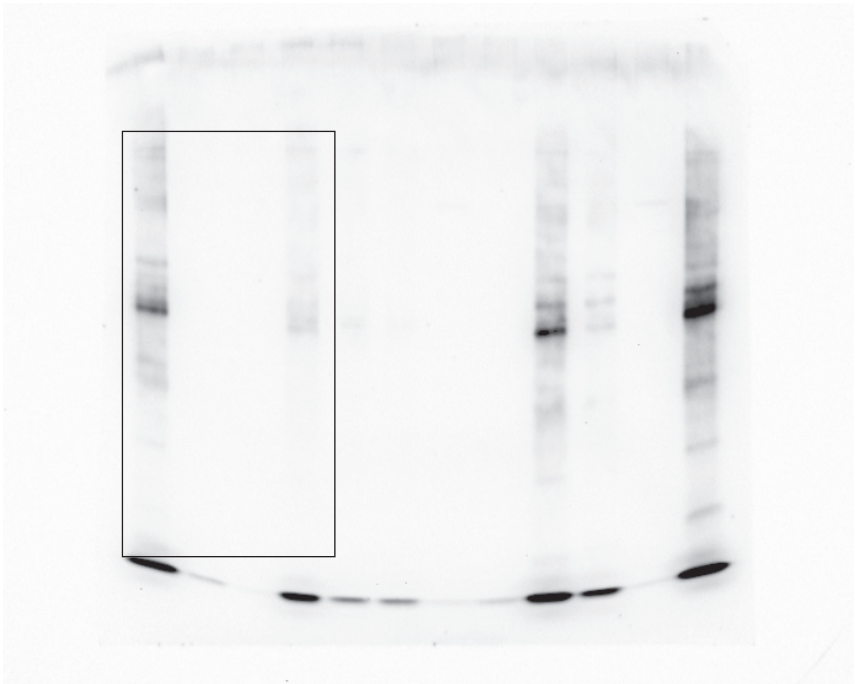

Supplement: fig2-figsupp1-data2 [file elife-95718-fig2-figsupp1-data2-v2.zip]
