# Supplementary material for: The role of RNA in the maintenance of chromatin domains as revealed by antibody-mediated proximity labelling coupled to mass spectrometry
Source: eLife. 2024 May 8;13:e95718. doi: 10.7554/eLife.95718 (PMC11147508; doi:10.7554/eLife.95718)
Supplement: Supplementary file 1. [file elife-95718-supp1.xlsx]

## Sheet: Exp_vs_AB_Ctl
name	Uniprot	symbol	imputed	num_NAs	Exp_vs_AB_Ctl.Exp_vs_AB_Ctl.logFC	Exp_vs_AB_Ctl.Exp_vs_AB_Ctl.CI.L	Exp_vs_AB_Ctl.Exp_vs_AB_Ctl.CI.R	Exp_vs_AB_Ctl.Exp_vs_AB_Ctl.AveExpr	Exp_vs_AB_Ctl.Exp_vs_AB_Ctl.t	Exp_vs_AB_Ctl.Exp_vs_AB_Ctl.P.Value	Exp_vs_AB_Ctl.Exp_vs_AB_Ctl.adj.P.Val	Exp_vs_AB_Ctl.Exp_vs_AB_Ctl.B	Exp_vs_AB_Ctl.Exp_vs_AB_Ctl.q.val	Exp_vs_AB_Ctl.Exp_vs_AB_Ctl.SEM
A0A023GQA5	A0A023GQA5	l(2)37Cc	FALSE	0	1.17466	0.00814944	2.34117	22.8483	2.54917	0.0489023	0.149919	-4.61028	0.0583139	0.460802
A0A0B4JCV4	A0A0B4JCV4	tacc	TRUE	3	2.5989	1.87068	3.32712	22.0741	9.03449	0.000210445	0.00900364	1.37649	0.00350215	0.287664
A0A0B4JCW4	A0A0B4JCW4	ScsbetaA	FALSE	0	0.288845	-0.464519	1.04221	23.0558	0.970588	0.374165	0.526159	-6.59147	0.20466	0.297598
A0A0B4JCZ3	A0A0B4JCZ3	pre-mod(mdg4)-W	TRUE	3	0.466628	-0.19597	1.12923	21.8	1.78277	0.13171	0.271874	-5.63635	0.105751	0.261743
A0A0B4JD11	A0A0B4JD11	eEF1gamma	FALSE	0	-0.534761	-1.34291	0.273391	26.5858	-1.6751	0.15176	0.29866	-5.77617	0.11617	0.319241
A0A0B4JD24	A0A0B4JD24	CG17002	TRUE	3	1.3068	0.542054	2.07155	21.7687	4.32579	0.00667818	0.0525181	-2.42585	0.020428	0.302096
A0A0B4JD39	A0A0B4JD39	ttk	FALSE	0	0.328786	-0.284215	0.941787	24.8303	1.35777	0.229783	0.382618	-6.17019	0.148827	0.242151
A0A0B4JD46	A0A0B4JD46	CNBP	FALSE	0	-0.0458046	-0.826319	0.73471	25.2267	-0.14856	0.887419	0.928486	-7.09033	0.361153	0.308323
A0A0B4JD48	A0A0B4JD48	Cp1	TRUE	2	0.459146	-1.08431	2.0026	21.4075	0.753065	0.483677	0.63151	-6.78516	0.245638	0.609703
A0A0B4JDA0	A0A0B4JDA0	mor	FALSE	0	-0.428934	-1.11	0.252137	24.7884	-1.59431	0.168764	0.316323	-5.87938	0.12304	0.26904
A0A0B4JDC3	A0A0B4JDC3	CG6621	FALSE	0	-0.141337	-0.78007	0.497395	24.3212	-0.560161	0.598349	0.722714	-6.92326	0.281114	0.252316
A0A0B4K618	A0A0B4K618	Fmr1	TRUE	4	-0.744296	-1.9686	0.480007	21.7272	-1.53898	0.181468	0.331546	-5.94907	0.128961	0.483631
A0A0B4K652	A0A0B4K652	RpII15	FALSE	0	0.952924	0.105423	1.80042	24.3134	2.84638	0.0338915	0.121928	-4.21606	0.0474265	0.334784
A0A0B4K657	A0A0B4K657	btsz	TRUE	4	2.31045	-0.128434	4.74934	22.9874	2.39817	0.0591823	0.171842	-4.81296	0.0668413	0.963423
A0A0B4K6J3	A0A0B4K6J3	mld	FALSE	0	0.605008	-0.050938	1.26095	23.0338	2.3349	0.0641603	0.178196	-4.89815	0.0693128	0.259116
A0A0B4K6L4	A0A0B4K6L4	Prat	FALSE	0	0.310258	-0.645427	1.26594	22.0221	0.821831	0.446748	0.595253	-6.72796	0.231536	0.37752
A0A0B4K6N1	A0A0B4K6N1	RpS8	FALSE	0	-0.198101	-0.825	0.428798	27.3466	-0.799953	0.458266	0.607802	-6.74658	0.236417	0.247641
A0A0B4K6U6	A0A0B4K6U6	sqd	FALSE	0	1.13836	0.513823	1.76289	26.3565	4.61421	0.00505527	0.0465922	-2.11563	0.018123	0.246707
A0A0B4K6W1	A0A0B4K6W1	su(Hw)	FALSE	0	-0.507272	-1.16137	0.146826	23.8726	-1.96324	0.103904	0.237805	-5.39767	0.0924991	0.258386
A0A0B4K726	A0A0B4K726	Tfb1	FALSE	0	0.186474	-0.781238	1.15419	22.1194	0.487806	0.645307	0.762253	-6.96583	0.296494	0.382271
A0A0B4K7G4	A0A0B4K7G4	mod	FALSE	0	-0.116338	-0.783103	0.550427	28.9184	-0.441697	0.676248	0.78684	-6.99015	0.306057	0.263389
A0A0B4K7J2	A0A0B4K7J2	Nup358	FALSE	0	-0.166045	-0.777726	0.445636	29.8767	-0.687188	0.521035	0.65674	-6.83617	0.255452	0.24163
A0A0B4K7L0	A0A0B4K7L0	rad50	FALSE	0	-0.632471	-1.23134	-0.0336058	24.8696	-2.67354	0.0418833	0.139966	-4.44439	0.0544425	0.236567
A0A0B4K849	A0A0B4K849	hts	FALSE	0	0.235167	-0.44624	0.916574	26.3433	0.873664	0.420324	0.572162	-6.6823	0.222554	0.269173
A0A0B4KED0	A0A0B4KED0	RpL38	TRUE	3	0.270195	-0.456578	0.996967	21.5841	0.941137	0.387744	0.54157	-6.61979	0.210654	0.287094
A0A0B4KEE4	A0A0B4KEE4	koi	FALSE	0	0.396725	-0.215793	1.00924	27.481	1.63963	0.159008	0.305923	-5.82169	0.118995	0.24196
A0A0B4KEF4	A0A0B4KEF4	Dscam1	FALSE	0	-0.657122	-1.27414	-0.0401028	23.8248	-2.69601	0.040736	0.137082	-4.41454	0.0533206	0.243738
A0A0B4KEH0	A0A0B4KEH0	14-3-3zeta	FALSE	0	0.272192	-0.371757	0.916141	25.9822	1.07003	0.331145	0.48494	-6.49149	0.188627	0.254376
A0A0B4KEI8	A0A0B4KEI8	CG30020	FALSE	0	-0.56875	-1.16937	0.0318736	24.1913	-2.39714	0.0592599	0.171842	-4.81434	0.0668413	0.237262
A0A0B4KEK1	A0A0B4KEK1	E(Pc)	TRUE	4	0.136613	-1.08242	1.35564	21.3228	0.283696	0.787454	0.865183	-7.05614	0.33653	0.481548
A0A0B4KER0	A0A0B4KER0	row	FALSE	0	-0.197664	-0.81321	0.417882	26.6925	-0.812908	0.45142	0.600372	-6.7356	0.233527	0.243156
A0A0B4KEW3	A0A0B4KEW3	Zasp52	TRUE	1	1.51202	-0.30502	3.32906	23.9562	2.10653	0.0861657	0.212768	-5.20573	0.0827602	0.717778
A0A0B4KEX0	A0A0B4KEX0	clu	TRUE	4	-0.245404	-0.898496	0.407689	21.3914	-0.951221	0.383051	0.536569	-6.61017	0.208709	0.257988
A0A0B4KEY6	A0A0B4KEY6	Patronin	FALSE	0	-0.576031	-1.26635	0.114289	24.2426	-2.11237	0.0855134	0.212243	-5.19788	0.0825564	0.272694
A0A0B4KF23	A0A0B4KF23	Nipped-B	FALSE	0	-0.226566	-0.887347	0.434214	24.9232	-0.867986	0.423159	0.574536	-6.68741	0.223477	0.261025
A0A0B4KF46	A0A0B4KF46	Uba1	FALSE	0	-0.140925	-0.789419	0.507568	24.8756	-0.550121	0.604743	0.727401	-6.92948	0.282937	0.256171
A0A0B4KF69	A0A0B4KF69	SRPK	TRUE	1	2.12714	1.09386	3.16043	23.3714	5.21138	0.0029424	0.0344153	-1.51236	0.0133865	0.408173
A0A0B4KF79	A0A0B4KF79	CG14657	TRUE	3	-1.00045	-1.66694	-0.33396	21.3568	-3.79994	0.0114443	0.0678687	-3.02449	0.0263989	0.26328
A0A0B4KFB8	A0A0B4KFB8	CG42724	FALSE	0	0.48204	-0.181726	1.14581	25.3188	1.83841	0.122411	0.260484	-5.56324	0.101321	0.262204
A0A0B4KFE9	A0A0B4KFE9	Mtor	FALSE	0	-0.644384	-1.23801	-0.0507624	29.6034	-2.74796	0.038214	0.132185	-4.34573	0.0514159	0.234496
A0A0B4KFJ7	A0A0B4KFJ7	Kdm2	TRUE	4	-0.365911	-1.20896	0.477136	21.4185	-1.09875	0.319522	0.473332	-6.46145	0.184112	0.333025
A0A0B4KFT0	A0A0B4KFT0	COX5A	TRUE	4	-0.291075	-1.45182	0.869666	21.361	-0.634811	0.55209	0.681634	-6.87393	0.265135	0.458523
A0A0B4KFZ9	A0A0B4KFZ9	His4r	FALSE	0	0.552848	-0.266845	1.37254	32.7031	1.70738	0.14545	0.290872	-5.73451	0.113141	0.3238
A0A0B4KG32	A0A0B4KG32	TAF1B	FALSE	0	-0.133524	-0.779374	0.512326	23.5337	-0.523362	0.62198	0.742579	-6.94557	0.288841	0.255127
A0A0B4KG97	A0A0B4KG97	fru	FALSE	0	1.0769	0.137153	2.01664	22.7433	2.90094	0.0317292	0.118353	-4.14461	0.0460359	0.371224
A0A0B4KGP8	A0A0B4KGP8	eIF2gamma	FALSE	0	-0.599295	-1.23906	0.040474	24.6561	-2.37133	0.0612415	0.17537	-4.84909	0.0682139	0.252725
A0A0B4KH12	A0A0B4KH12	bon	FALSE	0	-0.668526	-1.26657	-0.0704801	24.5564	-2.82982	0.0345796	0.123243	-4.23781	0.0479379	0.236244
A0A0B4KH25	A0A0B4KH25	His2Av	FALSE	0	2.58282	1.98461	3.18103	30.2957	10.9299	8.06165e-05	0.00529513	2.37733	0.00205965	0.236308
A0A0B4KH34	A0A0B4KH34	AnxB9	FALSE	0	0.125202	-0.53952	0.789923	22.6536	0.476809	0.652617	0.769631	-6.97183	0.299363	0.262582
A0A0B4KH51	A0A0B4KH51	Abi	FALSE	0	0.998867	-0.0659157	2.06365	22.4506	2.37477	0.0609735	0.17537	-4.84446	0.0682139	0.420616
A0A0B4KHB1	A0A0B4KHB1	osa	FALSE	0	-0.925974	-1.54591	-0.306041	25.5187	-3.78119	0.0116752	0.0686443	-3.04663	0.0267006	0.244889
A0A0B4KHD9	A0A0B4KHD9	CG5746	TRUE	1	1.52605	0.795351	2.25675	23.0034	5.28695	0.00275637	0.03408	-1.4396	0.0132561	0.288645
A0A0B4KHE1	A0A0B4KHE1	CG15514	TRUE	3	2.42329	1.50811	3.33847	23.2435	6.70305	0.000908765	0.0175331	-0.209426	0.00681986	0.36152
A0A0B4KHH6	A0A0B4KHH6	dgt1	FALSE	0	0.313962	-0.299971	0.927896	23.1617	1.29459	0.249284	0.405752	-6.24428	0.157825	0.242519
A0A0B4KHI4	A0A0B4KHI4	Syp	FALSE	0	0.678939	-0.511499	1.86938	22.6475	1.44377	0.205507	0.35556	-6.06672	0.138302	0.470253
A0A0B4KHR6	A0A0B4KHR6	NSD	FALSE	0	-1.5627	-2.43596	-0.689435	22.443	-4.53006	0.00547649	0.0485039	-2.20483	0.0188666	0.344962
A0A0B4KHS9	A0A0B4KHS9	Pp1alpha-96A	TRUE	2	-0.25208	-1.1072	0.603035	21.888	-0.746258	0.487448	0.632023	-6.79061	0.245838	0.337793
A0A0B4KHW3	A0A0B4KHW3	aralar1	TRUE	3	-0.791999	-2.27465	0.69065	21.4357	-1.35226	0.231426	0.384912	-6.17672	0.149719	0.585684
A0A0B4KHX3	A0A0B4KHX3	dco	FALSE	0	-0.0104984	-0.71142	0.690423	24.0287	-0.0379165	0.971149	0.981322	-7.10249	0.381705	0.276882
A0A0B4KI24	A0A0B4KI24	Nlp	FALSE	0	3.53274	2.91295	4.15253	22.616	14.4293	1.94389e-05	0.00234401	3.77156	0.000911749	0.244831
A0A0B4KI43	A0A0B4KI43	woc	FALSE	0	0.0596401	-1.26922	1.3885	25.8059	0.113614	0.913746	0.949167	-7.09572	0.369198	0.524934
A0A0B4KI59	A0A0B4KI59	CG7903	TRUE	2	2.16892	1.1243	3.21355	23.4764	5.25605	0.00283074	0.034134	-1.46926	0.0132771	0.412653
A0A0B4LEV8	A0A0B4LEV8	coil	FALSE	0	0.0374167	-0.569103	0.643936	24.5995	0.156169	0.881707	0.927797	-7.08896	0.360885	0.239591
A0A0B4LEY9	A0A0B4LEY9	Non1	FALSE	0	-0.72672	-1.36231	-0.091126	27.8501	-2.89442	0.0319794	0.118353	-4.15313	0.0460359	0.251076
A0A0B4LF57	A0A0B4LF57	Cam	TRUE	2	-0.0323729	-1.21678	1.15204	21.7915	-0.0691916	0.947386	0.967686	-7.10051	0.376401	0.467873
A0A0B4LF82	A0A0B4LF82	Sin3A	FALSE	0	-0.2555	-0.900517	0.389517	26.1466	-1.00276	0.359774	0.512789	-6.55985	0.19946	0.254798
A0A0B4LFB8	A0A0B4LFB8	Opa1	FALSE	0	0.20744	-0.606084	1.02096	25.6968	0.645501	0.545656	0.677157	-6.86643	0.263394	0.321363
A0A0B4LFD2	A0A0B4LFD2	Hsc70-5	FALSE	0	-0.745817	-1.38356	-0.108077	25.6134	-2.96049	0.0295416	0.113991	-4.06703	0.0443392	0.251924
A0A0B4LFD9	A0A0B4LFD9	RpS23	TRUE	1	1.27129	-0.538059	3.08064	24.6266	1.77868	0.132421	0.272953	-5.6417	0.106171	0.714739
A0A0B4LFI9	A0A0B4LFI9	CG30089	TRUE	1	-0.836678	-2.06949	0.396129	21.9746	-1.71806	0.143419	0.287834	-5.72067	0.111959	0.486991
A0A0B4LFK8	A0A0B4LFK8	Dcr-2	TRUE	3	-0.317272	-1.02382	0.389274	21.1983	-1.13675	0.304675	0.456854	-6.42094	0.177703	0.279104
A0A0B4LFL2	A0A0B4LFL2	eIF3c	FALSE	0	-0.198507	-0.897032	0.500017	23.8286	-0.719398	0.50253	0.645908	-6.81171	0.251239	0.275935
A0A0B4LFL3	A0A0B4LFL3	eEF1beta	FALSE	0	0.538021	-0.300534	1.37658	25.365	1.62421	0.162263	0.309027	-5.84138	0.120202	0.331251
A0A0B4LFR4	A0A0B4LFR4	OstDelta	FALSE	0	-0.301458	-0.920889	0.317973	24.2922	-1.23199	0.270074	0.426635	-6.31586	0.165948	0.244691
A0A0B4LFW6	A0A0B4LFW6	Rme-8	TRUE	3	-0.574629	-1.18685	0.0375884	21.2348	-2.37606	0.0608735	0.17537	-4.84272	0.0682139	0.241842
A0A0B4LFX0	A0A0B4LFX0	ena	FALSE	0	0.769358	0.134163	1.40455	25.3536	3.06617	0.0260585	0.10639	-3.93037	0.0413827	0.250918
A0A0B4LG52	A0A0B4LG52	RpS16	FALSE	0	0.960903	0.250472	1.67133	26.6454	3.42399	0.017262	0.0827091	-3.47874	0.0321714	0.280638
A0A0B4LGB0	A0A0B4LGB0	Gp150	FALSE	0	0.350381	-0.421033	1.12179	23.2325	1.14981	0.299711	0.452695	-6.40682	0.176085	0.304728
A0A0B4LGB7	A0A0B4LGB7	SERCA	FALSE	0	-1.01885	-1.62993	-0.407757	24.1924	-4.22065	0.00741331	0.0552941	-2.54211	0.0215078	0.241395
A0A0B4LGB9	A0A0B4LGB9	qkr58E-1	FALSE	0	3.08451	2.47172	3.6973	26.8504	12.7423	3.68445e-05	0.00380814	3.16038	0.00148125	0.242068
A0A0B4LGC6	A0A0B4LGC6	l(2)k09913	TRUE	1	-0.036412	-1.69619	1.62337	23.0771	-0.0555352	0.957757	0.973226	-7.10152	0.378556	0.655656
A0A0B4LGH1	A0A0B4LGH1	betaTub60D	FALSE	0	1.28539	0.387181	2.18359	23.4962	3.6227	0.0138531	0.0724887	-3.23596	0.028196	0.354815
A0A0B4LGT9	A0A0B4LGT9	CG9667	TRUE	3	1.6811	0.669408	2.6928	22.0223	4.20649	0.00751923	0.0557966	-2.55789	0.0217032	0.399645
A0A0B4LGV1	A0A0B4LGV1	EMC1	TRUE	1	-0.184206	-1.39034	1.02193	22.2495	-0.386617	0.714161	0.809233	-7.01625	0.314768	0.476455
A0A0B4LGV6	A0A0B4LGV6	Ibf1	FALSE	0	-0.115602	-0.758457	0.527253	26.89	-0.455227	0.667091	0.781603	-6.98324	0.30402	0.253944
A0A0B4LGX0	A0A0B4LGX0	Cenp-C	FALSE	0	0.945232	0.160803	1.72966	25.6885	3.05042	0.0265474	0.107409	-3.95065	0.0417789	0.30987
A0A0B4LGY0	A0A0B4LGY0	Unc-115a	FALSE	0	-0.439172	-1.08425	0.205904	23.9477	-1.72345	0.142405	0.286593	-5.71367	0.111476	0.254822
A0A0B4LGZ5	A0A0B4LGZ5	RpL11	FALSE	0	-0.240103	-0.906212	0.426005	26.2377	-0.91249	0.401326	0.554576	-6.64675	0.215713	0.26313
A0A0B4LH50	A0A0B4LH50	Act87E	TRUE	3	3.2229	2.3073	4.13849	23.4222	8.91082	0.000225428	0.00931984	1.30333	0.00362514	0.361683
A0A0B4LH64	A0A0B4LH64	Atx2	TRUE	1	0.971519	-0.299798	2.24283	23.7778	1.93452	0.107892	0.241297	-5.43593	0.0938574	0.502203
A0A0B4LHC3	A0A0B4LHC3	RhoGAP92B	TRUE	1	-0.117897	-1.64419	1.40839	22.327	-0.195542	0.852286	0.90412	-7.08083	0.351676	0.602923
A0A0B4LHF7	A0A0B4LHF7	pit	FALSE	0	-0.453108	-1.09108	0.184861	28.1152	-1.79795	0.129105	0.268026	-5.61646	0.104254	0.252014
A0A0B4LHG1	A0A0B4LHG1	E2f1	TRUE	3	0.129219	-0.867324	1.12576	21.4789	0.328251	0.755366	0.836918	-7.04031	0.325536	0.39366
A0A0B4LHK4	A0A0B4LHK4	mask	TRUE	2	-1.28381	-2.66268	0.0950576	20.636	-2.35696	0.0623752	0.176698	-4.86843	0.0687303	0.544689
A0A0B4LHQ4	A0A0B4LHQ4	ctrip	FALSE	0	-0.128723	-0.84087	0.583425	21.8286	-0.457572	0.66551	0.780793	-6.98203	0.303705	0.281317
A0A0B4LHQ5	A0A0B4LHQ5	pre-mod(mdg4)-I	TRUE	4	0.648702	-1.2432	2.54061	21.9642	0.868003	0.423151	0.574536	-6.68739	0.223477	0.74735
A0A0B4LHR3	A0A0B4LHR3	XNP	TRUE	2	0.810974	0.190506	1.43144	20.4999	3.30874	0.0196674	0.0895939	-3.62225	0.0348494	0.245101
A0A0B4LHU8	A0A0B4LHU8	kay	FALSE	0	1.7276	0.884511	2.57068	22.511	5.18734	0.00300458	0.034492	-1.53566	0.0134164	0.333041
A0A0B4LI25	A0A0B4LI25	ncd	FALSE	0	-0.201394	-1.07783	0.675043	26.9299	-0.581702	0.584765	0.709862	-6.90958	0.276115	0.346215
A0A0B4LI86	A0A0B4LI86	RpII140	FALSE	0	0.475732	-0.151116	1.10258	28.0543	1.92121	0.109792	0.243291	-5.45363	0.094633	0.247621
A0A0B4LIA3	A0A0B4LIA3	Akt1	TRUE	4	-1.27145	-2.15056	-0.392346	21.2406	-3.66128	0.0132834	0.071454	-3.18951	0.0277935	0.347271
A0A0B4LIF3	A0A0B4LIF3	Nelf-A	FALSE	0	-0.476894	-1.091	0.137208	23.1521	-1.96587	0.103545	0.237448	-5.39415	0.0923602	0.242586
A0A0B4LIF8	A0A0B4LIF8	pre-mod(mdg4)-J	TRUE	4	-0.559631	-1.78135	0.662086	21.6252	-1.15959	0.296041	0.45043	-6.39618	0.175204	0.482609
A0A0B4LIJ0	A0A0B4LIJ0	Rpt2	TRUE	1	1.14981	0.423824	1.8758	22.7666	4.00933	0.00918942	0.0609958	-2.78095	0.0237256	0.286784
A0A0C4DHE8	A0A0C4DHE8	RpS29	TRUE	4	0.906777	-0.610713	2.42427	21.8692	1.51269	0.187822	0.337127	-5.98185	0.131132	0.599447
A0A0C4DHG5	A0A0C4DHG5	B52	FALSE	0	0.947344	0.0742085	1.82048	28.0136	2.74663	0.038276	0.132185	-4.34748	0.0514159	0.344911
A0A0S0WNN6	A0A0S0WNN6	emb	TRUE	4	-0.780613	-1.55407	-0.00715226	21.5589	-2.55489	0.0485526	0.14948	-4.60263	0.0581433	0.305537
A0A126GUM1	A0A126GUM1	psq	TRUE	2	2.10043	0.550103	3.65076	23.5635	3.42973	0.0171513	0.0824901	-3.47165	0.0320862	0.61242
A0A126GUM8	A0A126GUM8	lig	FALSE	0	-0.893304	-1.67099	-0.115619	27.5685	-2.90784	0.0314668	0.118266	-4.1356	0.0460021	0.307205
A0A126GUS7	A0A126GUS7	Fmr1	FALSE	0	0.627308	-0.044145	1.29876	28.2807	2.36505	0.0617346	0.175985	-4.85755	0.068453	0.265241
A0A126GUT1	A0A126GUT1	Tctp	FALSE	0	-0.0952107	-0.822229	0.631807	23.732	-0.331524	0.753029	0.834968	-7.03906	0.324778	0.287191
A0A126GUU7	A0A126GUU7	Bin1	FALSE	0	1.35749	-0.27218	2.98715	24.5976	2.10868	0.0859247	0.212535	-5.20283	0.0826698	0.64376
A0A126GUW2	A0A126GUW2	l(3)07882	FALSE	0	0.119217	-0.731782	0.970217	27.4973	0.354638	0.736614	0.823903	-7.0299	0.320474	0.336166
A0A126GUZ1	A0A126GUZ1	pre-mod(mdg4)-V	TRUE	2	1.40256	0.446252	2.35886	23.2992	3.71278	0.0125639	0.0707389	-3.12788	0.0275153	0.377765
A0A1Z1CGZ3	A0A1Z1CGZ3	CG5316	TRUE	3	-0.730138	-1.43783	-0.0224411	21.5757	-2.61175	0.0452224	0.14422	-4.52666	0.0560971	0.279558
A1A708	A1A708	CG4951	FALSE	0	-1.22856	-1.9169	-0.540209	24.1788	-4.51817	0.00553923	0.0485039	-2.21753	0.0188666	0.271914
A1YK02	A1YK02	Nup75	FALSE	0	-1.33194	-2.15439	-0.509493	26.7237	-4.09969	0.00837634	0.0585534	-2.67797	0.0227755	0.324889
A1Z6H7	A1Z6H7	Gp210	FALSE	0	-0.969222	-1.59913	-0.339318	29.4027	-3.89514	0.010349	0.0644845	-2.91291	0.0250826	0.248828
A1Z6L9	A1Z6L9	Trap1	FALSE	0	-1.02036	-1.67725	-0.36346	21.8534	-3.93215	0.00995594	0.0633479	-2.86993	0.0246405	0.259491
A1Z6M0	A1Z6M0	Bap170	FALSE	0	0.625381	-0.0256954	1.27646	23.7104	2.43157	0.0567227	0.167506	-4.76803	0.0651547	0.257192
A1Z6Q0	A1Z6Q0	koi	FALSE	0	1.27147	0.611051	1.93189	25.8066	4.87373	0.00397329	0.0396507	-1.84713	0.0154229	0.260882
A1Z6Z3	A1Z6Z3	Aldh-III	FALSE	0	-0.780522	-1.39214	-0.168903	24.2268	-3.23057	0.0215125	0.0946156	-3.72066	0.0368026	0.241605
A1Z729	A1Z729	CG2064	FALSE	0	-0.496	-1.13337	0.141368	24.3969	-1.97	0.102987	0.236714	-5.38865	0.0920748	0.251777
A1Z784	A1Z784	ACC	FALSE	0	-3.62723	-4.4049	-2.84956	27.973	-11.8074	5.44089e-05	0.00393649	2.77486	0.00153118	0.307199
A1Z7H3	A1Z7H3	Acsl	FALSE	0	-0.624488	-1.33472	0.0857452	23.5223	-2.22586	0.0738154	0.193148	-5.04509	0.0751289	0.28056
A1Z7J7	A1Z7J7	Sec31	FALSE	0	-0.182179	-0.994921	0.630563	22.2841	-0.567441	0.593737	0.719546	-6.91869	0.279882	0.321054
A1Z7K2	A1Z7K2	CG30349	FALSE	0	-0.679514	-1.80876	0.449732	26.932	-1.5233	0.185233	0.334621	-5.96864	0.130158	0.446081
A1Z7K8	A1Z7K8	AIMP1	TRUE	3	1.7567	1.11803	2.39537	22.1417	6.96297	0.000756879	0.0155512	-0.00832971	0.00604895	0.252291
A1Z7P7	A1Z7P7	Su(var)2-10	FALSE	0	1.04836	-0.224668	2.32139	23.398	2.08472	0.0886485	0.215587	-5.23503	0.083857	0.502879
A1Z830	A1Z830	CG12128	FALSE	0	0.0444809	-0.730357	0.819319	24.6668	0.145324	0.889851	0.930155	-7.09089	0.361803	0.306081
A1Z843	A1Z843	CG1371	TRUE	4	-0.595872	-1.56617	0.374424	20.9567	-1.55462	0.177786	0.326882	-5.92946	0.127147	0.383292
A1Z898	A1Z898	Caf1-105	FALSE	0	0.787072	0.0984013	1.47574	23.5831	2.89319	0.0320268	0.118353	-4.15474	0.0460359	0.272043
A1Z8D5	A1Z8D5	CG18004	TRUE	2	2.85445	1.48521	4.22368	22.9211	5.27738	0.00277916	0.03408	-1.44877	0.0132561	0.540883
A1Z8M2	A1Z8M2	tou	TRUE	4	-0.557714	-1.40653	0.291107	21.2526	-1.6633	0.154135	0.300179	-5.79135	0.116761	0.335306
A1Z8R2	A1Z8R2	ADD1	FALSE	0	-0.314612	-0.927397	0.298172	23.8508	-1.2997	0.247652	0.404917	-6.23835	0.157501	0.242066
A1Z8S6	A1Z8S6	pds5	FALSE	0	-0.283683	-0.952963	0.385597	23.2177	-1.073	0.329928	0.483695	-6.48842	0.188143	0.264383
A1Z8U0	A1Z8U0	Prp8	FALSE	0	-0.346594	-1.47167	0.778482	28.6404	-0.779855	0.469038	0.618121	-6.76335	0.240431	0.444434
A1Z909	A1Z909	CG8545	FALSE	0	0.651542	-0.173153	1.47624	27.8187	1.99997	0.0990234	0.232157	-5.34861	0.0903023	0.325776
A1Z934	A1Z934	CG8778	TRUE	2	0.647765	-0.0480543	1.34358	21.9928	2.35665	0.0623999	0.176698	-4.86885	0.0687303	0.274867
A1Z945	A1Z945	Nup188	FALSE	0	-0.804142	-1.63949	0.0312048	26.2597	-2.43692	0.0563395	0.166714	-4.76085	0.0648469	0.329984
A1Z968	A1Z968	NAT1	TRUE	1	0.911635	-0.505534	2.3288	22.6519	1.62845	0.161362	0.308036	-5.83597	0.119817	0.559818
A1Z9E2	A1Z9E2	mip120	FALSE	0	-0.214345	-0.818276	0.389586	25.9379	-0.898464	0.408111	0.558691	-6.65972	0.217314	0.238568
A1Z9E3	A1Z9E3	mEFTu1	FALSE	0	-1.27283	-1.89144	-0.654226	24.1482	-5.20872	0.0029492	0.0344153	-1.51493	0.0133865	0.244366
A1Z9G2	A1Z9G2	fand	FALSE	0	-0.274609	-0.945467	0.396249	23.4278	-1.03624	0.345281	0.498127	-6.5262	0.193757	0.265006
A1Z9I5	A1Z9I5	tum	FALSE	0	-0.508164	-1.13348	0.117155	26.5172	-2.0572	0.0918873	0.221602	-5.27197	0.0861964	0.247017
A1Z9J1	A1Z9J1	shot	TRUE	2	0.579747	-0.460692	1.62019	22.2268	1.41058	0.214578	0.365956	-6.107	0.142346	0.411
A1Z9J3	A1Z9J3	shot	FALSE	0	-0.593365	-1.39675	0.210016	27.2268	-1.86971	0.117475	0.254023	-5.52191	0.0988075	0.317356
A1Z9L3	A1Z9L3	pea	FALSE	0	-0.639015	-1.33101	0.0529784	25.0599	-2.33767	0.0639327	0.178167	-4.89441	0.0693018	0.273355
A1Z9S6	A1Z9S6	Su(var)2-HP2	FALSE	0	0.977332	0.0428101	1.91185	26.8341	2.64745	0.0432594	0.142112	-4.4791	0.0552775	0.36916
A1Z9S8	A1Z9S8	CG12863	FALSE	0	-0.0114201	-0.659138	0.636298	23.5874	-0.0446332	0.966042	0.977526	-7.10216	0.380229	0.255865
A1ZA77	A1ZA77	CG8320	TRUE	3	0.446365	-1.3246	2.21733	21.4123	0.63805	0.550136	0.680381	-6.87166	0.264648	0.699576
A1ZA92	A1ZA92	CG8414	FALSE	0	0.198705	-0.738311	1.13572	27.2836	0.53683	0.61327	0.734782	-6.93756	0.285809	0.370146
A1ZAN7	A1ZAN7	RhoGEF2	FALSE	0	-0.368546	-0.985099	0.248008	23.0883	-1.5132	0.187698	0.337127	-5.98122	0.131132	0.243554
A1ZAV3	A1ZAV3	MESR4	FALSE	0	-0.459339	-1.08464	0.16596	24.0168	-1.8596	0.119047	0.255526	-5.53528	0.0993922	0.247009
A1ZAW7	A1ZAW7	ND-51L1	TRUE	3	-1.27878	-2.40657	-0.150984	21.7417	-2.87038	0.0329208	0.119512	-4.18459	0.0464867	0.445507
A1ZBB4	A1ZBB4	CG30122	FALSE	0	0.546261	-0.115122	1.20764	25.8536	2.09085	0.0879436	0.214753	-5.2268	0.0835326	0.261263
A1ZBE9	A1ZBE9	MetRS	FALSE	0	-0.48187	-1.18196	0.218217	26.0587	-1.74242	0.138894	0.281483	-5.68902	0.109489	0.276552
A1ZBJ2	A1ZBJ2	CG7461	TRUE	3	-1.3299	-3.58731	0.927504	21.5719	-1.49137	0.193133	0.343321	-6.00828	0.133541	0.891733
A1ZBW6	A1ZBW6	CG11180	FALSE	0	0.443893	-0.381891	1.26968	24.5301	1.36078	0.228892	0.382053	-6.16663	0.148607	0.326206
A4V0S1	A4V0S1	Syx5	TRUE	4	-0.697191	-1.77177	0.377386	21.4359	-1.64244	0.158422	0.305242	-5.8181	0.11873	0.424485
A4V2B8	A4V2B8	CkIIalpha	FALSE	0	0.668006	-0.369091	1.7051	25.4206	1.63056	0.160916	0.30759	-5.83328	0.119643	0.40968
A4V2K7	A4V2K7	D1	FALSE	0	4.7078	4.09782	5.31778	27.2025	19.5378	4.0377e-06	0.00185023	5.13644	0.000719684	0.240958
A4V2S3	A4V2S3	CtBP	FALSE	0	-0.297432	-0.929154	0.334291	24.0791	-1.19189	0.284198	0.438885	-6.3607	0.170713	0.249547
A4V303	A4V303	CCT3	FALSE	0	-0.479405	-1.14642	0.187615	23.9392	-1.81944	0.125504	0.263577	-5.58822	0.102524	0.26349
A4V391	A4V391	CCT1	FALSE	0	-0.572618	-1.22333	0.0780898	24.0683	-2.22768	0.0736418	0.193053	-5.04263	0.0750919	0.257046
A4V3G8	A4V3G8	ball	FALSE	0	-0.0973451	-0.702157	0.507467	27.0503	-0.407445	0.699708	0.799088	-7.00676	0.310821	0.238916
A4V3J6	A4V3J6	Hrb98DE	FALSE	0	1.26279	0.530256	1.99533	28.857	4.36393	0.00643249	0.0522427	-2.3841	0.0203209	0.28937
A4V4A1	A4V4A1	Klp10A	FALSE	0	-0.622669	-1.23578	-0.00955797	24.6904	-2.57095	0.0475862	0.147762	-4.58115	0.0574751	0.242195
A4V4A5	A4V4A5	Ran	FALSE	0	0.128784	-0.705466	0.963034	25.6485	0.390787	0.711256	0.808474	-7.01439	0.314472	0.32955
A8DYB0	A8DYB0	CG13185	FALSE	0	-0.0279229	-0.979743	0.923897	22.1455	-0.0742645	0.943537	0.966925	-7.10008	0.376105	0.375993
A8DYD3	A8DYD3	cg	FALSE	0	0.472339	-0.513846	1.45852	25.4084	1.21247	0.276871	0.432182	-6.33779	0.168106	0.389568
A8DYI6	A8DYI6	Phb2	FALSE	0	1.28937	0.501044	2.07769	25.8824	4.14044	0.00803671	0.0578563	-2.63194	0.0225044	0.311408
A8DYV8	A8DYV8	CG34179	TRUE	3	0.538915	-0.0656968	1.14353	21.626	2.25641	0.0709637	0.190156	-5.00392	0.0739651	0.238837
A8DZ29	A8DZ29	eIF4G1	FALSE	0	0.079162	-0.586523	0.744847	27.9876	0.301039	0.774903	0.853337	-7.05025	0.331923	0.262963
A8JUV0	A8JUV0	sno	FALSE	0	-0.0232403	-0.939363	0.892883	23.1526	-0.0642188	0.951161	0.969247	-7.1009	0.377008	0.361892
A8JUY3	A8JUY3	RpIIIC160	FALSE	0	-0.430221	-1.33053	0.47009	24.5476	-1.20969	0.277851	0.433244	-6.3409	0.168519	0.355646
A8JV02	A8JV02	CG34417	FALSE	0	1.03362	-0.745489	2.81272	22.938	1.47073	0.198409	0.348966	-6.03372	0.135737	0.702792
A8Y527	A8Y527	scro	TRUE	2	0.595573	-0.00656286	1.19771	21.6073	2.50389	0.0517662	0.156053	-4.67094	0.0607001	0.237859
A8Y560	A8Y560	RpL15	FALSE	0	-0.632648	-1.60224	0.336943	27.9339	-1.65176	0.156491	0.30273	-5.80615	0.117753	0.383013
B3DN53	B3DN53	Cap-G	FALSE	0	-0.389934	-1.33302	0.553149	24.9688	-1.04669	0.340858	0.493715	-6.51555	0.19204	0.372542
B6IDV6	B6IDV6	Pvr	FALSE	0	-0.764067	-1.40678	-0.121356	23.8325	-3.00947	0.0278668	0.109637	-4.00351	0.0426454	0.253887
B7YZQ1	B7YZQ1	Slik	FALSE	0	0.0947985	-0.863555	1.05315	23.2428	0.25041	0.811742	0.880503	-7.06651	0.342489	0.378574
B7YZQ7	B7YZQ7	Nurf-38	TRUE	1	0.210798	-0.830971	1.25257	21.8912	0.512236	0.629228	0.747727	-6.95205	0.290843	0.411526
B7Z0G1	B7Z0G1	hay	TRUE	1	0.147372	-0.887209	1.18195	22.2138	0.360601	0.732404	0.82027	-7.02744	0.319061	0.408686
B7Z0I8	B7Z0I8	CG42232	FALSE	0	0.265908	-0.572842	1.10466	30.0661	0.802553	0.456886	0.606527	-6.74439	0.235921	0.331328
B7Z0R6	B7Z0R6	Doa	FALSE	0	-0.210048	-0.85262	0.432525	25.2967	-0.827505	0.443797	0.594055	-6.72306	0.23107	0.253833
B7Z0V1	B7Z0V1	Taf7	FALSE	0	0.440225	-0.873651	1.7541	23.5398	0.848194	0.433157	0.58536	-6.705	0.227687	0.519014
B7Z0X1	B7Z0X1	Shmt	FALSE	0	0.181306	-0.534537	0.897148	21.8775	0.641163	0.548261	0.679807	-6.86948	0.264425	0.282776
B7Z120	B7Z120	Tlk	FALSE	0	0.722626	-0.218326	1.66358	23.7029	1.94411	0.106542	0.239935	-5.42316	0.0933274	0.3717
B7Z152	B7Z152	CG1529	TRUE	4	-1.37994	-2.03757	-0.72232	20.9536	-5.31201	0.00269773	0.03408	-1.41565	0.0132561	0.259778
C0HL67	C0HL67		TRUE	4	3.44454	0.822853	6.06622	23.2763	3.32602	0.0192837	0.0888649	-3.6006	0.0345658	1.03563
C9QP42	C9QP42	eIF4A	FALSE	0	-0.282831	-1.15202	0.586358	24.2612	-0.823734	0.445757	0.594479	-6.72632	0.231235	0.343352
D2NUK9	D2NUK9	hoip	FALSE	0	1.07956	0.367226	1.7919	27.4386	3.83652	0.0110086	0.065824	-2.98145	0.0256036	0.281391
D5AEK7	D5AEK7	Agpat3	FALSE	0	-0.663086	-1.29163	-0.0345454	24.664	-2.67061	0.042035	0.140149	-4.44828	0.0545138	0.24829
E1JGN7	E1JGN7	HnRNP-K	FALSE	0	1.15003	0.308133	1.99193	24.5441	3.458	0.0166168	0.0817842	-3.43677	0.0318116	0.332572
E1JGZ8	E1JGZ8	LRR	FALSE	0	-0.603989	-1.20782	-0.00015544	25.1235	-2.53213	0.0499591	0.152191	-4.63309	0.0591978	0.23853
E1JH24	E1JH24	tea	FALSE	0	-0.351134	-0.95791	0.255642	23.3666	-1.46494	0.199914	0.350241	-6.04083	0.136233	0.239692
E1JH57	E1JH57	mars	FALSE	0	-0.279377	-0.923996	0.365243	24.9561	-1.09714	0.320164	0.473332	-6.46315	0.184112	0.254641
E1JHA4	E1JHA4	Hrb27C	FALSE	0	0.719661	-0.0489494	1.48827	26.6709	2.37026	0.0613251	0.17537	-4.85052	0.0682139	0.303621
E1JHJ2	E1JHJ2	CG5953	TRUE	3	-0.467722	-1.30468	0.369241	20.925	-1.41467	0.213439	0.365498	-6.10205	0.142168	0.330622
E1JHR5	E1JHR5	Eno	FALSE	0	0.356353	-0.28456	0.997266	22.8079	1.40753	0.215431	0.366308	-6.11068	0.142483	0.253177
E1JHX5	E1JHX5	CG7611	TRUE	4	-0.343034	-0.982583	0.296516	21.0897	-1.3578	0.229773	0.382618	-6.17015	0.148827	0.252638
E1JI11	E1JI11	Taf4	FALSE	0	0.669578	-0.435896	1.77505	23.7904	1.5333	0.182822	0.333178	-5.95616	0.129597	0.436691
E1JI58	E1JI58	Sin	TRUE	3	0.988423	-0.342187	2.31903	21.688	1.88047	0.115826	0.251275	-5.50767	0.0977386	0.525625
E1JIJ9	E1JIJ9	Su(var)3-7	FALSE	0	-0.537162	-1.26024	0.18592	23.6474	-1.88058	0.115809	0.251275	-5.50753	0.0977386	0.285636
E1JIK0	E1JIK0	Hrb87F	FALSE	0	1.72102	0.617222	2.82483	28.7473	3.94703	0.00980262	0.0633479	-2.8527	0.0246405	0.43603
E1JIP3	E1JIP3	WRNexo	TRUE	1	-0.0858479	-1.5384	1.3667	23.1169	-0.149615	0.886627	0.928486	-7.09014	0.361153	0.573794
E1JIT0	E1JIT0	how	TRUE	3	0.608029	-0.146543	1.3626	22.0865	2.03985	0.0939926	0.224899	-5.29523	0.087479	0.298075
E1JIZ7	E1JIZ7	CG42487	TRUE	4	0.171388	-0.796684	1.13946	21.3802	0.448176	0.671855	0.785278	-6.98686	0.30545	0.382414
E1JJ68	E1JJ68	Rm62	FALSE	0	-0.149584	-0.754032	0.454863	30.0742	-0.626472	0.557143	0.683788	-6.8797	0.265973	0.238772
E1JJ72	E1JJ72	Taf1	FALSE	0	0.574425	-0.146382	1.29523	26.1822	2.01739	0.0967931	0.228856	-5.32532	0.089018	0.284737
E1JJD6	E1JJD6	tyf	FALSE	0	-0.300609	-1.02482	0.423597	24.488	-1.05079	0.339135	0.492303	-6.51135	0.191491	0.28608
E1JJE8	E1JJE8	Mnt	TRUE	4	-1.40681	-2.1132	-0.700412	21.4463	-5.04152	0.00341626	0.0375112	-1.67875	0.0145907	0.279044
E1JJI5	E1JJI5	CkIalpha	FALSE	0	-0.612573	-1.30731	0.0821605	25.0904	-2.2321	0.073223	0.193053	-5.03668	0.0750919	0.274437
E1JJN9	E1JJN9	Set2	FALSE	0	-0.175513	-0.856537	0.505511	23.3724	-0.652412	0.541522	0.673913	-6.86152	0.262132	0.269022
E1JJS2	E1JJS2	RhoGAP19D	TRUE	4	-0.807665	-1.62218	0.00684537	20.8145	-2.51021	0.051356	0.15514	-4.66247	0.0603449	0.321753
E2QC83	E2QC83	Pabp2	TRUE	3	4.0892	3.44219	4.73621	22.9064	15.9994	1.13979e-05	0.00185023	4.25888	0.000719684	0.255584
E2QCF1	E2QCF1	ATPCL	TRUE	2	0.424274	-0.96194	1.81049	22.3947	0.774802	0.471774	0.620597	-6.76751	0.241394	0.54759
E2QCG7	E2QCG7	eIF3b	FALSE	0	1.77206	0.559591	2.98453	23.6861	3.69983	0.0127405	0.070935	-3.14333	0.0275916	0.478957
E2QCS8	E2QCS8	tho2	FALSE	0	0.267582	-0.632529	1.16769	25.7962	0.752551	0.483961	0.63151	-6.78557	0.245638	0.355567
E2QCY2	E2QCY2	CG3961	FALSE	0	-1.23914	-2.2225	-0.255782	23.6334	-3.18994	0.0225472	0.0975949	-3.77214	0.0379615	0.388453
E2QD63	E2QD63	HIP-R	TRUE	1	0.579687	-0.0769817	1.23636	22.068	2.23471	0.0729767	0.193048	-5.03316	0.0750899	0.259401
E2QD64	E2QD64	NO66	FALSE	0	-0.982163	-1.72784	-0.236489	27.1143	-3.33433	0.0191023	0.0884885	-3.59021	0.0344194	0.294561
E2QD65	E2QD65	RpS19a	FALSE	0	0.981455	0.215888	1.74702	23.6523	3.24535	0.0211491	0.0935863	-3.70198	0.0364023	0.302418
E2QD75	E2QD75	Cbp80	FALSE	0	-0.549948	-1.22974	0.129846	25.2538	-2.04795	0.0930038	0.223549	-5.28437	0.0869539	0.268536
E4NKG1	E4NKG1	Capr	FALSE	0	0.621963	-0.0962114	1.34014	24.5999	2.19235	0.0770835	0.197681	-5.09024	0.0768921	0.283697
E8NHB1	E8NHB1	Taf2	FALSE	0	0.418076	-0.634537	1.47069	24.3998	1.00545	0.358589	0.511714	-6.55717	0.199042	0.415809
F0JAN1	F0JAN1	Paics	FALSE	0	0.00710281	-0.680596	0.694801	25.0967	0.0261461	0.980102	0.98761	-7.10294	0.384151	0.271659
F3YDH0	F3YDH0	Hsc70-3	FALSE	0	1.0278	0.174614	1.88099	26.4758	3.04958	0.0265739	0.107409	-3.95174	0.0417789	0.337032
F6J1D0	F6J1D0	sqh	TRUE	2	0.113005	-0.743922	0.969931	22.1331	0.333831	0.751384	0.834422	-7.03818	0.324565	0.338508
G3M3A2	G3M3A2	RpS3	FALSE	0	2.00166	1.08478	2.91855	27.3549	5.5265	0.00225089	0.0312869	-1.21408	0.0121697	0.362194
H0RNN8	H0RNN8	CG13096	FALSE	0	-0.437099	-1.15942	0.285221	27.838	-1.53188	0.183162	0.333379	-5.95793	0.129674	0.285335
H8F4P0	H8F4P0	MED1	TRUE	3	-0.498619	-1.36227	0.365031	21.497	-1.46152	0.200807	0.350503	-6.04501	0.136335	0.341164
L0MLQ9	L0MLQ9	4E-T	TRUE	4	-0.911256	-1.91299	0.0904824	20.5785	-2.30282	0.0668527	0.183407	-4.94137	0.0713399	0.395712
M9MQH9	M9MQH9	Pp2A-29B	TRUE	1	0.443982	-0.890972	1.77894	23.2139	0.841925	0.43636	0.58795	-6.71051	0.228695	0.527341
M9MRC9	M9MRC9	RpL27A	FALSE	0	0.14257	-0.46521	0.75035	26.235	0.593821	0.577206	0.702454	-6.90168	0.273234	0.240089
M9MRJ4	M9MRJ4	Msp300	FALSE	0	-0.329856	-1.06373	0.404018	26.8469	-1.13783	0.304262	0.456709	-6.41977	0.177646	0.289899
M9MRM4	M9MRM4	Sac1	FALSE	0	-0.420728	-1.07383	0.232375	23.8357	-1.63078	0.160869	0.30759	-5.833	0.119643	0.257992
M9MRT6	M9MRT6	Rap1	FALSE	0	0.251422	-0.417376	0.92022	22.5067	0.951662	0.382847	0.536569	-6.60974	0.208709	0.264192
M9MS02	M9MS02	su(w[a])	TRUE	4	-1.00036	-1.65989	-0.340838	21.3893	-3.83973	0.0109713	0.065824	-2.97768	0.0256036	0.260529
M9MS35	M9MS35	Cfp1	FALSE	0	-0.292475	-1.11644	0.53149	22.4655	-0.898576	0.408056	0.558691	-6.65962	0.217314	0.325487
M9MSJ7	M9MSJ7	CG42676	FALSE	0	2.06097	1.4513	2.67064	24.1196	8.55758	0.000275684	0.00972963	1.08832	0.00378454	0.240835
M9MSL0	M9MSL0	CG42588	TRUE	1	-0.53029	-1.16649	0.105914	21.2351	-2.11005	0.0857726	0.212522	-5.201	0.0826648	0.251317
M9MSQ1	M9MSQ1	CG5004	TRUE	1	0.0755828	-0.934551	1.08572	22.5238	0.189417	0.856847	0.906992	-7.08221	0.352793	0.399029
M9ND19	M9ND19	Gale	FALSE	0	0.524418	-0.521043	1.56988	24.159	1.26983	0.257329	0.414548	-6.27282	0.161247	0.412984
M9ND28	M9ND28	Spn	TRUE	1	-0.223678	-0.963814	0.516459	21.7316	-0.765042	0.477092	0.625886	-6.77548	0.243451	0.292373
M9NDC3	M9NDC3	Fs(2)Ket	FALSE	0	-1.06213	-1.75568	-0.368578	26.469	-3.8768	0.0105504	0.0644845	-2.9343	0.0250826	0.27397
M9NDM4	M9NDM4	wds	FALSE	0	-0.614392	-1.31499	0.0862074	24.3115	-2.21999	0.0743774	0.194232	-5.053	0.0755504	0.276755
M9NDP0	M9NDP0	CG9932	TRUE	4	-0.515024	-1.74113	0.711077	21.3988	-1.06335	0.333902	0.487544	-6.49842	0.18964	0.484341
M9NDP1	M9NDP1	ctp	FALSE	0	0.70317	-0.0779133	1.48425	24.4761	2.27897	0.0689334	0.186811	-4.97352	0.0726637	0.308548
M9NDW1	M9NDW1	DIP2	TRUE	1	-0.210151	-0.930988	0.510686	21.8478	-0.738021	0.492039	0.637404	-6.79714	0.247931	0.284749
M9NDX3	M9NDX3	Top1	FALSE	0	0.493305	-0.146509	1.13312	28.3777	1.95181	0.105472	0.23898	-5.41291	0.0929562	0.252743
M9NE89	M9NE89	Lam	FALSE	0	0.657147	0.00656636	1.30773	30.8511	2.55703	0.0484225	0.149406	-4.59976	0.0581143	0.256996
M9NEA5	M9NEA5	ct	TRUE	1	0.361969	-0.610782	1.33472	23.085	0.941986	0.387348	0.541538	-6.61899	0.210642	0.384261
M9NEL3	M9NEL3	kis	FALSE	0	0.263004	-0.655836	1.18184	26.4384	0.724599	0.499584	0.643148	-6.80767	0.250165	0.362965
M9NEU5	M9NEU5	chic	TRUE	1	1.34816	-0.0342431	2.73056	23.7496	2.46877	0.054112	0.161443	-4.71805	0.0627967	0.546084
M9NEV0	M9NEV0	lid	TRUE	1	-0.0968639	-0.909564	0.715836	23.1845	-0.301721	0.774411	0.853337	-7.05001	0.331923	0.321037
M9NF33	M9NF33	Cpsf6	FALSE	0	1.31524	0.696607	1.93387	27.9516	5.38203	0.00254137	0.0337373	-1.34917	0.0131228	0.244376
M9NFE1	M9NFE1	CG14200	FALSE	0	-0.180743	-0.802042	0.440556	23.4317	-0.736438	0.492925	0.637777	-6.79839	0.248076	0.245429
M9NFJ2	M9NFJ2	slgA	FALSE	0	-0.214493	-0.814127	0.38514	23.8041	-0.905529	0.404682	0.555047	-6.6532	0.215897	0.236871
M9NG39	M9NG39	Pep	FALSE	0	1.12185	0.497672	1.74602	28.8651	4.5499	0.00537367	0.0482963	-2.18371	0.0187858	0.246566
M9NG50	M9NG50	Moe	TRUE	1	-0.30241	-0.963532	0.358712	22.0259	-1.15795	0.296655	0.45043	-6.39798	0.175204	0.26116
M9NH51	M9NH51	U2af50	FALSE	0	1.05609	0.41568	1.6965	24.9344	4.17462	0.00776398	0.0562568	-2.59353	0.0218822	0.252979
M9PAY6	M9PAY6	CG17078	FALSE	0	-0.113289	-0.879316	0.652739	23.401	-0.374383	0.722714	0.816368	-7.0216	0.317543	0.3026
M9PB84	M9PB84	RpS2	FALSE	0	-0.331292	-0.939843	0.277259	26.9882	-1.37812	0.223807	0.376569	-6.14597	0.146474	0.240393
M9PB96	M9PB96	CG6724	FALSE	0	-0.438276	-1.10756	0.231005	23.8598	-1.65773	0.155268	0.301573	-5.7985	0.117303	0.264383
M9PBE2	M9PBE2	Hakai	TRUE	1	0.940459	0.111782	1.76913	22.7926	2.87296	0.0328185	0.119512	-4.18121	0.0464867	0.327348
M9PBH8	M9PBH8	CG2199	FALSE	0	-0.600427	-1.3847	0.183849	28.6839	-1.93806	0.107392	0.240924	-5.43122	0.0937122	0.309809
M9PBJ2	M9PBJ2	l(2)gl	TRUE	3	0.731132	0.0308562	1.43141	21.5946	2.64303	0.0434975	0.142397	-4.48498	0.0553882	0.276627
M9PBK5	M9PBK5	RpLP1	FALSE	0	-0.142484	-0.91017	0.625202	23.9222	-0.469849	0.657267	0.773223	-6.97556	0.300761	0.303256
M9PBL3	M9PBL3	Hsp83	FALSE	0	-0.0571976	-0.710114	0.595718	28.284	-0.221766	0.832835	0.894168	-7.07441	0.347805	0.257919
M9PBM1	M9PBM1	U2af38	FALSE	0	1.42479	0.706696	2.14288	25.2518	5.02279	0.00347374	0.0375112	-1.69735	0.0145907	0.283664
M9PBM2	M9PBM2	enc	FALSE	0	0.0232898	-0.675906	0.722486	23.3189	0.0843222	0.935911	0.962518	-7.09914	0.374391	0.2762
M9PBS9	M9PBS9	Ist1	TRUE	3	-0.467987	-1.18441	0.248436	21.5026	-1.65363	0.156107	0.30273	-5.80376	0.117753	0.283005
M9PBZ3	M9PBZ3	spen	FALSE	0	0.75249	-0.0497826	1.55476	23.2398	2.3744	0.0610024	0.17537	-4.84496	0.0682139	0.316918
M9PBZ9	M9PBZ9	eIF4E1	TRUE	2	0.244569	-0.428695	0.917834	21.7666	0.919584	0.397929	0.551007	-6.64013	0.214325	0.265957
M9PC74	M9PC74	CG31650	TRUE	3	0.468033	-0.133566	1.06963	21.8857	1.96945	0.103061	0.236714	-5.38938	0.0920748	0.237647
M9PC85	M9PC85	x16	TRUE	1	3.03732	1.19732	4.87731	24.5455	4.17877	0.0077316	0.0562568	-2.58889	0.0218822	0.726845
M9PC89	M9PC89	snRNP-U1-70K	FALSE	0	1.05376	0.414533	1.69298	26.784	4.17313	0.00777565	0.0562568	-2.59521	0.0218822	0.25251
M9PCE0	M9PCE0	Pgk	FALSE	0	-0.56044	-1.3635	0.242623	21.4991	-1.76667	0.134531	0.275341	-5.6574	0.107099	0.31723
M9PCH8	M9PCH8	baf	TRUE	1	0.0314148	-0.749493	0.812322	22.7753	0.101838	0.922648	0.95353	-7.09722	0.370895	0.308479
M9PCI2	M9PCI2	NHP2	FALSE	0	-0.0242103	-0.619172	0.570751	25.3027	-0.103011	0.92176	0.95353	-7.09708	0.370895	0.235025
M9PCJ7	M9PCJ7	Utx	TRUE	4	0.40544	-0.341238	1.15212	21.2002	1.37457	0.22484	0.377471	-6.15021	0.146825	0.294957
M9PD27	M9PD27	eRF1	TRUE	1	0.839453	-0.748635	2.42754	23.6608	1.33812	0.235691	0.390212	-6.19342	0.151781	0.627335
M9PD43	M9PD43	CG16865	TRUE	3	2.04317	1.40333	2.68302	22.222	8.0836	0.000365459	0.0112515	0.784964	0.00437649	0.252755
M9PDC7	M9PDC7	Dap160	FALSE	0	-0.0622334	-0.87123	0.746763	23.776	-0.194738	0.852884	0.90412	-7.08101	0.351676	0.319574
M9PDX6	M9PDX6	promL	TRUE	3	-0.276503	-1.1119	0.55889	21.2444	-0.837884	0.438435	0.58918	-6.71404	0.229173	0.330002
M9PE12	M9PE12	E(bx)	FALSE	0	-0.346717	-0.961957	0.268523	27.6644	-1.42661	0.210151	0.361151	-6.0876	0.140477	0.243036
M9PE74	M9PE74	nocte	FALSE	0	-0.226203	-1.35086	0.898452	24.0946	-0.509159	0.631241	0.749307	-6.95382	0.291458	0.444268
M9PEB2	M9PEB2	Chd1	TRUE	1	-0.601048	-1.60365	0.401557	23.1661	-1.51759	0.186622	0.335873	-5.97576	0.130645	0.396055
M9PEY6	M9PEY6	Rat1	FALSE	0	1.6049	0.987432	2.22237	24.8224	6.57974	0.000993166	0.0186638	-0.307298	0.00725965	0.243915
M9PFB2	M9PFB2	tral	FALSE	0	1.22756	0.200269	2.25484	24.3871	3.02499	0.0273584	0.109104	-3.98345	0.042438	0.405805
M9PFF0	M9PFF0	RpL13	FALSE	0	-0.250858	-0.865412	0.363695	27.0273	-1.03334	0.346515	0.498416	-6.52914	0.193869	0.242764
M9PFN1	M9PFN1	rept	FALSE	0	-0.146336	-0.93101	0.638338	26.2105	-0.472102	0.65576	0.772707	-6.97436	0.30056	0.309966
M9PFS7	M9PFS7	Sfmbt	FALSE	0	-0.572784	-1.42273	0.277167	23.9304	-1.70597	0.145719	0.290872	-5.73633	0.113141	0.335752
M9PFY2	M9PFY2	CG6479	FALSE	0	-0.670521	-1.67957	0.338529	24.0065	-1.68219	0.150352	0.298027	-5.76705	0.115924	0.398601
M9PFZ1	M9PFZ1	Nopp140	FALSE	0	0.8458	-0.373825	2.06543	25.5542	1.75556	0.136512	0.278233	-5.67189	0.108224	0.481783
M9PG22	M9PG22	Arf79F	FALSE	0	0.128498	-1.03892	1.29592	22.0887	0.278641	0.791126	0.868141	-7.0578	0.337681	0.46116
M9PG32	M9PG32	Taf6	FALSE	0	-0.0248525	-0.870714	0.821009	23.5305	-0.0743782	0.943451	0.966925	-7.10007	0.376105	0.334137
M9PG47	M9PG47	RpS26	TRUE	1	0.997501	-0.0540657	2.04907	24.5165	2.40133	0.0589451	0.171617	-4.80871	0.0667538	0.415396
M9PG50	M9PG50	Cdk12	FALSE	0	1.66884	1.07323	2.26445	25.0532	7.09291	0.00069221	0.0148782	0.0896433	0.00578719	0.235283
M9PG55	M9PG55	CG10600	FALSE	0	0.162844	-0.471199	0.796888	24.9598	0.650172	0.54286	0.674634	-6.86311	0.262412	0.250463
M9PG76	M9PG76	RpLP0	FALSE	0	-0.69475	-1.768	0.378494	24.2706	-1.63872	0.159198	0.305923	-5.82285	0.118995	0.423959
M9PG82	M9PG82	HIPP1	FALSE	0	-0.304052	-0.922086	0.313983	25.1131	-1.2454	0.265494	0.421701	-6.30068	0.164029	0.244139
M9PGG4	M9PGG4	arm	TRUE	4	-2.10879	-3.3658	-0.851789	21.753	-4.2469	0.00722143	0.054424	-2.51292	0.0211693	0.496549
M9PGK3	M9PGK3	CG43736	TRUE	2	0.565427	-0.753226	1.88408	22.2522	1.08548	0.32485	0.478674	-6.4754	0.18619	0.520902
M9PGQ6	M9PGQ6	Bx42	FALSE	0	1.90486	1.11117	2.69856	24.3952	6.07554	0.00144902	0.0243807	-0.724948	0.00948335	0.31353
M9PGW8	M9PGW8	bif	TRUE	3	-0.490342	-1.39061	0.409923	21.6931	-1.37881	0.22361	0.376569	-6.14515	0.146474	0.355628
M9PH59	M9PH59	RpL37a	FALSE	0	-0.109541	-0.858667	0.639585	23.5658	-0.370166	0.725673	0.817158	-7.02341	0.31785	0.295924
M9PHL0	M9PHL0	e(y)3	TRUE	1	-0.344506	-0.963796	0.274783	22.2379	-1.40824	0.215229	0.366308	-6.10981	0.142483	0.244635
M9PHM6	M9PHM6	RpL18	FALSE	0	0.214657	-0.438319	0.867634	27.0582	0.832191	0.44137	0.591902	-6.719	0.230232	0.257942
M9PI05	M9PI05	JIL-1	FALSE	0	0.548974	-0.189405	1.28735	27.3338	1.88212	0.115576	0.251275	-5.50549	0.0977386	0.291678
M9PI47	M9PI47	Sap130	FALSE	0	1.14495	0.436035	1.85386	23.1374	4.08854	0.00847209	0.0588525	-2.69061	0.0228919	0.280038
M9PIA6	M9PIA6	Mi-2	FALSE	0	-0.0168157	-0.652758	0.619127	27.2158	-0.0669377	0.949097	0.967966	-7.10069	0.37651	0.251214
M9PIM0	M9PIM0	RpL10	FALSE	0	0.397007	-0.241754	1.03577	25.3986	1.57338	0.173464	0.32304	-5.90584	0.125653	0.252327
M9PJN0	M9PJN0	mud	FALSE	0	-1.07812	-1.8725	-0.283729	24.1742	-3.43564	0.0170378	0.0824901	-3.46434	0.0320862	0.313803
M9PJN8	M9PJN8	Gapdh2	FALSE	0	-0.537729	-2.13389	1.05843	24.2763	-0.85283	0.430799	0.58313	-6.70091	0.22682	0.630523
N0D8I3	N0D8I3	Spt6	FALSE	0	0.950654	0.174911	1.7264	27.3189	3.10227	0.0249753	0.105056	-3.88402	0.0408637	0.306439
O01666	O01666	ATPsyngamma	FALSE	0	-0.237896	-0.902831	0.427039	23.9096	-0.905696	0.404601	0.555047	-6.65305	0.215897	0.262666
O02193	O02193	mof	FALSE	0	1.51953	0.716578	2.32247	24.7498	4.79067	0.00428753	0.0416379	-1.93199	0.0161959	0.317185
O15971	O15971	Rab10	TRUE	4	-0.835439	-1.53125	-0.139627	21.1848	-3.03947	0.0268934	0.108096	-3.96477	0.0420463	0.274864
O16102	O16102	Chd3	TRUE	3	-0.444638	-1.10276	0.213484	21.3299	-1.71031	0.14489	0.290382	-5.73071	0.11295	0.259975
O16797	O16797	RpL3	FALSE	0	-0.663329	-1.29621	-0.0304499	27.0977	-2.65328	0.0429476	0.142112	-4.47133	0.0552775	0.250004
O16810	O16810	Orc1	FALSE	0	0.550891	-0.287262	1.38904	23.4293	1.66386	0.154021	0.300179	-5.79063	0.116761	0.331092
O17432	O17432	Cdk9	TRUE	4	0.1323	-0.777072	1.04167	21.4003	0.368293	0.726989	0.817368	-7.02421	0.317932	0.359225
O18332	O18332	Rab1	FALSE	0	-0.0754735	-0.827508	0.676561	24.0221	-0.254057	0.809069	0.878921	-7.06543	0.341874	0.297073
O18335	O18335	Rab11	TRUE	2	0.414396	-0.21719	1.04598	22.2743	1.66096	0.154611	0.300701	-5.79436	0.116964	0.249493
O18373	O18373	Sps1	FALSE	0	2.39502	1.34181	3.44823	24.5826	5.75662	0.00186416	0.0280984	-1.00449	0.0109294	0.416046
O18404	O18404	scu	FALSE	0	-0.443329	-1.08439	0.197733	23.5849	-1.75066	0.137396	0.279623	-5.67829	0.108765	0.253236
O18413	O18413	Rpt6	FALSE	0	-0.148309	-0.815353	0.518734	22.2367	-0.562845	0.596646	0.721259	-6.92158	0.280548	0.263499
O18640	O18640	Rack1	FALSE	0	-0.168445	-1.13895	0.802066	25.2306	-0.439371	0.677828	0.787805	-6.99132	0.306433	0.383376
O44081	O44081	Nop60B	FALSE	0	-0.106631	-0.737466	0.524204	28.3997	-0.4279	0.68565	0.790369	-6.99699	0.30743	0.249196
O44226	O44226	EloB	TRUE	3	0.827177	0.0176042	1.63675	21.3307	2.58653	0.0466681	0.146483	-4.56033	0.0569776	0.319802
O44434	O44434	qkr58E-3	FALSE	0	1.41979	0.653424	2.18616	25.7446	4.68988	0.00470807	0.0442375	-2.03631	0.0172071	0.302735
O44437	O44437	SmD3	FALSE	0	-0.182508	-1.08478	0.719765	24.4616	-0.512057	0.629345	0.747727	-6.95215	0.290843	0.356421
O46048	O46048	east	FALSE	0	0.10034	-0.693173	0.893853	26.206	0.320106	0.761193	0.842084	-7.04337	0.327546	0.313458
O46106	O46106	noi	TRUE	1	1.26713	0.31039	2.22388	23.1656	3.35275	0.0187069	0.0876017	-3.56722	0.0340745	0.377938
O46231	O46231	tmod	TRUE	3	-0.412497	-1.04578	0.220783	21.3448	-1.64892	0.157077	0.303459	-5.8098	0.118037	0.250162
O46307	O46307	CG11417	FALSE	0	0.272223	-0.330953	0.875398	25.8253	1.1425	0.302483	0.45451	-6.41474	0.176791	0.23827
O61307	O61307	Ten-m	TRUE	2	0.380089	-0.496022	1.2562	21.5016	1.09825	0.319721	0.473332	-6.46198	0.184112	0.346086
O61345	O61345	peng	FALSE	0	1.10483	0.485597	1.72407	26.7403	4.51664	0.00554736	0.0485039	-2.21916	0.0188666	0.244614
O61360	O61360	crol	FALSE	0	0.954671	-0.0932545	2.0026	25.3446	2.30621	0.0665632	0.183407	-4.93681	0.0713399	0.413957
O62530	O62530	AP-2mu	FALSE	0	-0.719431	-1.39047	-0.0483872	22.582	-2.71402	0.0398417	0.135969	-4.39066	0.052888	0.265079
O62619	O62619	PyK	FALSE	0	0.362725	-0.553557	1.27901	24.8302	1.00213	0.360051	0.512789	-6.56047	0.19946	0.361955
O62621	O62621	beta'COP	FALSE	0	-0.550959	-1.17276	0.0708437	25.0689	-2.24306	0.0721951	0.192387	-5.02191	0.0748329	0.245628
O76268	O76268	NTPase	TRUE	1	-0.230652	-1.06371	0.602403	21.2591	-0.700905	0.513099	0.652993	-6.82586	0.253995	0.329078
O76742	O76742	Rab7	TRUE	1	0.70008	-0.575479	1.97564	22.8252	1.38938	0.220564	0.373214	-6.1325	0.145169	0.503878
O76861	O76861	CG2685	TRUE	2	0.221554	-0.565101	1.00821	22.1034	0.712967	0.506188	0.648115	-6.81666	0.252097	0.310749
O76863	O76863	eIF2Bbeta	TRUE	1	-0.547444	-1.74535	0.650461	22.4392	-1.15689	0.297052	0.45056	-6.39913	0.175254	0.473203
O76994	O76994	Ip259	FALSE	0	-0.21713	-0.869529	0.435269	25.9595	-0.842523	0.436054	0.58795	-6.70999	0.228695	0.257714
O77410	O77410	eIF3e	FALSE	0	0.978428	0.302429	1.65443	24.2992	3.66402	0.013244	0.071454	-3.18622	0.0277935	0.267037
O77430	O77430	SkpA	TRUE	1	-0.806055	-1.73724	0.12513	22	-2.19131	0.0771872	0.197681	-5.09164	0.0768921	0.367842
O77434	O77434	Sec22	FALSE	0	0.66878	-0.106439	1.444	23.4663	2.1839	0.0779308	0.199233	-5.10162	0.0774957	0.306231
O77459	O77459	ken	TRUE	4	-0.361898	-1.11235	0.388555	21.3906	-1.22078	0.27396	0.430423	-6.32848	0.167422	0.296448
O96433	O96433	CycT	FALSE	0	0.373841	-0.41356	1.16124	23.215	1.20189	0.280615	0.435676	-6.34959	0.169465	0.311043
O96607	O96607	homer	TRUE	2	0.149769	-0.893607	1.19314	21.5225	0.363376	0.730448	0.819232	-7.02628	0.318657	0.41216
O96689	O96689	vtd	FALSE	0	-0.0930352	-0.718604	0.532533	24.4919	-0.376485	0.721242	0.815341	-7.02069	0.317143	0.247116
O97102	O97102	smt3	FALSE	0	0.627128	-0.102423	1.35668	27.3591	2.17608	0.0787245	0.200299	-5.11215	0.0779104	0.288191
O97183	O97183	RpII33	FALSE	0	1.12968	0.403405	1.85595	25.6251	3.93758	0.00989967	0.0633479	-2.86363	0.0246405	0.286897
O97365	O97365	SPARC	TRUE	4	-1.15855	-2.05461	-0.262487	20.7333	-3.27304	0.020487	0.0917793	-3.66708	0.0356994	0.353967
O97454	O97454	l(1)10Bb	TRUE	1	-0.164248	-1.28161	0.95311	22.012	-0.37212	0.724301	0.816762	-7.02257	0.317696	0.441385
O97477	O97477	Inos	TRUE	4	-0.223504	-1.60153	1.15452	21.4793	-0.410584	0.697541	0.797899	-7.00529	0.310359	0.544356
P02283	P02283	His2B:CG17949	FALSE	0	0.298495	-0.346065	0.943056	31.9468	1.17233	0.291322	0.445134	-6.38226	0.173144	0.254618
P02299	P02299	His3:CG31613	FALSE	0	-0.168966	-1.28268	0.944751	31.7558	-0.384059	0.715945	0.809987	-7.01738	0.315061	0.439947
P04052	P04052	RpII215	FALSE	0	-0.78354	-1.44324	-0.123843	28.8623	-3.00671	0.0279585	0.109637	-4.00709	0.0426454	0.260598
P04359	P04359	RpL32	FALSE	0	-0.741213	-1.82462	0.342194	25.5756	-1.73191	0.140828	0.283813	-5.70268	0.110395	0.427973
P05205	P05205	Su(var)205	FALSE	0	1.22378	0.416906	2.03066	27.3594	3.83947	0.0109743	0.065824	-2.97799	0.0256036	0.318738
P05552	P05552	Adf1	FALSE	0	2.20818	1.44452	2.97184	24.2319	7.31999	0.000594104	0.0148782	0.256907	0.00578719	0.301664
P06605	P06605	alphaTub84D	FALSE	0	1.03357	0.386108	1.68104	29.2155	4.0411	0.00889374	0.0601549	-2.7446	0.0233985	0.255766
P07664	P07664	Sry-delta	TRUE	1	-1.39007	-2.54632	-0.23382	22.0659	-3.0434	0.0267684	0.107894	-3.95969	0.0419675	0.456748
P08120	P08120	Col4a1	FALSE	0	-0.308413	-1.00157	0.384749	27.1475	-1.12635	0.308679	0.461731	-6.43211	0.1796	0.273817
P08646	P08646	Ras85D	TRUE	2	-0.56203	-1.18963	0.0655746	21.4862	-2.26698	0.0700043	0.188986	-4.98967	0.0735098	0.24792
P08736	P08736	eEF1alpha1	FALSE	0	-0.612908	-1.21449	-0.0113238	30.8146	-2.57913	0.0471014	0.147483	-4.57021	0.0573667	0.237641
P09180	P09180	RpL4	FALSE	0	-0.423082	-1.16002	0.313851	29.2232	-1.45335	0.202957	0.352718	-6.05502	0.137197	0.291108
P11147	P11147	Hsc70-4	FALSE	0	-0.103785	-0.697754	0.490185	29.3188	-0.442328	0.675819	0.78684	-6.98983	0.306057	0.234633
P12982	P12982	Pp1-87B	FALSE	0	-0.50639	-1.17252	0.159742	24.9793	-1.92442	0.109331	0.243291	-5.44936	0.094633	0.26314
P13060	P13060	eEF2	FALSE	0	-0.639222	-2.09885	0.820404	27.5567	-1.10863	0.315605	0.469836	-6.45101	0.182752	0.57659
P13395	P13395	alpha-Spec	FALSE	0	-0.114529	-1.09527	0.866216	26.1836	-0.29562	0.778817	0.856343	-7.05212	0.333092	0.387419
P13709	P13709	fs(1)h	FALSE	0	0.905141	0.0322038	1.77808	26.0874	2.62487	0.04449	0.143659	-4.50917	0.055879	0.344833
P14199	P14199	ref(2)P	TRUE	1	0.186504	-0.682817	1.05582	22.693	0.543103	0.609237	0.731092	-6.93377	0.284373	0.343404
P15348	P15348	Top2	FALSE	0	-0.382982	-1.03003	0.264063	30.8815	-1.49837	0.191373	0.341451	-5.99961	0.132814	0.255599
P15357	P15357	RpS27A	FALSE	0	0.474743	-0.959891	1.90938	26.8799	0.837707	0.438526	0.58918	-6.7142	0.229173	0.566717
P17210	P17210	Khc	TRUE	4	0.106567	-0.780144	0.993277	21.1263	0.304238	0.772596	0.853337	-7.04912	0.331923	0.350274
P17336	P17336	Cat	FALSE	0	-0.97606	-1.70589	-0.246235	22.7344	-3.38558	0.018025	0.0853909	-3.52636	0.0332145	0.2883
P17704	P17704	RpS17	TRUE	3	1.53799	0.203543	2.87244	22.7051	2.91761	0.0310995	0.117977	-4.12286	0.0458894	0.527142
P17886	P17886	crn	FALSE	0	0.355066	-0.249571	0.959703	22.7761	1.48658	0.194344	0.344758	-6.01419	0.134101	0.238847
P18289	P18289	Jra	TRUE	3	1.4769	0.486314	2.46748	22.3807	3.77428	0.0117617	0.0686443	-3.0548	0.0267006	0.391305
P19018	P19018	tra2	TRUE	1	1.54885	0.276216	2.82148	22.9306	3.08092	0.0256096	0.105316	-3.91141	0.0409648	0.502722
P20028	P20028	RpI135	FALSE	0	-0.891841	-1.51226	-0.271423	25.8508	-3.63896	0.0136097	0.0724016	-3.21635	0.0281621	0.245081
P20227	P20227	Tbp	TRUE	1	2.18628	1.4582	2.91437	23.4171	7.60147	0.000494274	0.0133815	0.457535	0.00520502	0.287613
P20240	P20240	Ote	FALSE	0	0.821807	0.0127232	1.63089	28.5579	2.57129	0.0475657	0.147762	-4.58069	0.0574751	0.319609
P20348	P20348	janA	TRUE	4	-0.0334973	-0.702965	0.635971	21.3607	-0.126664	0.903898	0.940964	-7.09387	0.366007	0.264457
P21187	P21187	pAbp	FALSE	0	1.60621	1.00118	2.21125	26.8717	6.72042	0.000897562	0.0175331	-0.195767	0.00681986	0.239005
P22465	P22465	AnxB10	FALSE	0	1.13763	0.165916	2.10934	23.789	2.96372	0.0294276	0.113855	-4.06282	0.0442862	0.38385
P22813	P22813	Hsf	TRUE	2	0.235394	-0.535795	1.00658	21.6863	0.772698	0.472917	0.621536	-6.76923	0.241759	0.304639
P23128	P23128	me31B	FALSE	0	-0.73546	-1.32918	-0.14174	23.2725	-3.13583	0.0240131	0.102321	-3.84108	0.0397998	0.234535
P23226	P23226	Map205	FALSE	0	0.867614	0.150457	1.58477	24.5712	3.06258	0.0261691	0.10639	-3.93499	0.0413827	0.283295
P23572	P23572	Cdk1	TRUE	4	-0.47251	-1.44657	0.501548	20.7463	-1.22801	0.27145	0.427454	-6.32035	0.166267	0.384778
P24014	P24014	sli	TRUE	1	-0.219428	-1.80554	1.36668	22.6682	-0.350215	0.739743	0.825933	-7.0317	0.321263	0.626554
P24785	P24785	mle	FALSE	0	1.13786	0.48132	1.7944	23.0175	4.38735	0.00628677	0.051682	-2.35858	0.0201027	0.259351
P25007	P25007	Cyp1	FALSE	0	0.663623	-0.00545144	1.3327	24.5274	2.51086	0.051314	0.15514	-4.6616	0.0603449	0.264302
P25167	P25167	RpIII128	TRUE	3	-0.0389781	-0.996313	0.918356	21.8412	-0.10307	0.921716	0.95353	-7.09707	0.370895	0.378172
P25171	P25171	Rcc1	FALSE	0	-0.250389	-0.934063	0.433284	25.2932	-0.927133	0.394338	0.547607	-6.63304	0.213003	0.270068
P25439	P25439	brm	FALSE	0	0.722785	-0.214968	1.66054	25.9627	1.95117	0.10556	0.23898	-5.41375	0.0929562	0.370436
P25991	P25991	su(f)	TRUE	1	-0.409205	-1.26035	0.441944	21.9945	-1.21705	0.275261	0.431064	-6.33266	0.167671	0.336226
P25992	P25992	yem	TRUE	4	-0.502552	-1.31924	0.314136	21.0752	-1.55776	0.177056	0.32671	-5.92552	0.12708	0.322613
P26017	P26017	Pc	TRUE	2	1.21098	0.398697	2.02326	21.9954	3.77403	0.0117649	0.0686443	-3.0551	0.0267006	0.320872
P26019	P26019	DNApol-alpha180	TRUE	1	-0.670146	-1.81522	0.474931	21.1417	-1.48153	0.195632	0.346063	-6.02042	0.134608	0.452335
P26802	P26802	Dbp73D	FALSE	0	-0.00554425	-0.835351	0.824262	25.5	-0.0169138	0.987127	0.992522	-7.10317	0.386061	0.327795
P27864	P27864	Rrp1	FALSE	0	0.32881	-0.888395	1.54601	27.1166	0.683842	0.522983	0.658622	-6.83865	0.256184	0.480827
P28166	P28166	zfh1	FALSE	0	-0.0225481	-0.73618	0.691084	23.1736	-0.0799852	0.939198	0.963844	-7.09956	0.374907	0.281903
P28668	P28668	GluProRS	FALSE	0	-1.13044	-1.89905	-0.361836	27.8842	-3.72322	0.0124234	0.0704967	-3.11543	0.0274211	0.30362
P29327	P29327	RpS6	FALSE	0	-0.257272	-0.910012	0.395469	26.5269	-0.997761	0.361979	0.513587	-6.56481	0.19977	0.257849
P32234	P32234	128up	TRUE	1	-0.118974	-1.74145	1.5035	21.9105	-0.18563	0.85967	0.909013	-7.08304	0.353579	0.640921
P34739	P34739	lds	FALSE	0	0.682918	-0.113914	1.47975	23.7707	2.16958	0.0793902	0.20154	-5.1209	0.0783929	0.314769
P35381	P35381	blw	FALSE	0	-0.617683	-1.28382	0.0484562	24.5823	-2.34734	0.0631474	0.177426	-4.8814	0.0690133	0.263142
P35600	P35600	Gnf1	FALSE	0	-0.358255	-0.95229	0.235779	27.1398	-1.52671	0.184408	0.333863	-5.96439	0.129863	0.234659
P35875	P35875	Parp	TRUE	1	-0.285136	-0.940742	0.37047	21.8717	-1.10099	0.318629	0.473074	-6.45909	0.184012	0.258981
P36241	P36241	RpL19	FALSE	0	-0.38642	-0.997086	0.224246	25.7222	-1.60188	0.167094	0.314824	-5.86978	0.122457	0.241229
P37276	P37276	Dhc64C	FALSE	0	-0.679844	-1.34357	-0.0161208	24.0487	-2.59297	0.0462944	0.145626	-4.55173	0.0566442	0.262188
P38979	P38979	sta	FALSE	0	0.181887	-0.42179	0.785563	24.9587	0.76273	0.478359	0.626979	-6.77736	0.243876	0.238468
P40796	P40796	La	FALSE	0	0.164291	-0.463042	0.791625	23.6162	0.662966	0.53525	0.668401	-6.85394	0.259988	0.247813
P40797	P40797	pnut	TRUE	2	0.730476	-0.277954	1.73891	22.8107	1.83373	0.123168	0.261496	-5.56942	0.101714	0.398356
P41093	P41093	RpL18A	FALSE	0	0.132611	-0.523078	0.7883	27.457	0.511984	0.629393	0.747727	-6.95219	0.290843	0.259014
P41094	P41094	RpS18	FALSE	0	-0.257512	-0.851905	0.336882	24.9967	-1.09673	0.320329	0.473332	-6.46359	0.184112	0.234801
P41375	P41375	eIF2beta	FALSE	0	-1.33513	-1.97542	-0.694845	21.9731	-5.27867	0.00277608	0.03408	-1.44754	0.0132561	0.25293
P45437	P45437	betaCOP	FALSE	0	-0.773563	-1.78355	0.236423	22.553	-1.9389	0.107273	0.240924	-5.4301	0.0937122	0.39897
P45594	P45594	tsr	FALSE	0	1.00878	0.343663	1.6739	25.0944	3.83949	0.0109741	0.065824	-2.97797	0.0256036	0.262739
P45889	P45889	Arp1	TRUE	3	1.83789	0.959904	2.71588	22.2283	5.29916	0.00272762	0.03408	-1.42793	0.0132561	0.346827
P45890	P45890	Arp6	TRUE	2	-0.0789713	-1.03314	0.875196	21.8179	-0.209517	0.841905	0.901063	-7.07751	0.350487	0.376921
P46863	P46863	Klp61F	FALSE	0	-0.360867	-0.992061	0.270326	27.1085	-1.4473	0.204564	0.354921	-6.06241	0.138054	0.249338
P48149	P48149	RpS15Aa	FALSE	0	-0.322261	-0.998365	0.353843	24.536	-1.20661	0.278938	0.433538	-6.34433	0.168633	0.267078
P48159	P48159	RpL23	FALSE	0	-0.0284394	-0.646448	0.589569	24.9779	-0.116493	0.911572	0.947589	-7.09533	0.368584	0.244129
P48555	P48555	Rala	TRUE	2	1.17148	0.218609	2.12436	22.6799	3.11225	0.0246845	0.10444	-3.87122	0.0406241	0.37641
P48588	P48588	RpS25	FALSE	0	0.93805	0.340931	1.53517	23.7126	3.97686	0.00950344	0.0627922	-2.81827	0.0244243	0.235877
P48591	P48591	RnrL	FALSE	0	-0.282522	-0.981295	0.416252	24.6607	-1.02351	0.350734	0.503984	-6.53908	0.196035	0.276033
P48610	P48610	Argk	TRUE	2	-0.396922	-1.10893	0.315086	21.7349	-1.41122	0.214399	0.365956	-6.10622	0.142346	0.281261
P49028	P49028	mago	TRUE	3	-1.35133	-3.59308	0.890416	21.81	-1.52598	0.184582	0.333863	-5.96529	0.129863	0.885549
P49846	P49846	Taf5	FALSE	0	-0.22488	-0.82007	0.370311	24.4994	-0.956465	0.380629	0.53421	-6.60513	0.207792	0.235115
P50536	P50536	msl-3	FALSE	0	0.457935	-0.138524	1.05439	25.56	1.94356	0.106619	0.239935	-5.42389	0.0933274	0.235616
P50887	P50887	RpL22	FALSE	0	-0.306641	-0.915032	0.301749	25.5182	-1.27592	0.255328	0.412344	-6.26582	0.160389	0.24033
P51406	P51406	bys	FALSE	0	2.30742	1.6254	2.98944	25.7088	8.56454	0.000274573	0.00972963	1.09264	0.00378454	0.269415
P52172	P52172	srp	FALSE	0	0.626805	-0.234647	1.48826	24.485	1.84194	0.121844	0.260042	-5.55859	0.101149	0.340295
P52295	P52295	Pen	FALSE	0	3.09418	1.97545	4.2129	24.5936	7.00159	0.000736946	0.0154545	0.020963	0.00601134	0.441925
P52304	P52304	polo	TRUE	2	-0.461117	-1.13377	0.211538	22.0384	-1.73538	0.140187	0.283312	-5.69818	0.1102	0.265716
P52656	P52656	TfIIA-S	TRUE	4	1.04733	-0.480428	2.57509	21.6128	1.73542	0.14018	0.283312	-5.69813	0.1102	0.603504
P53034	P53034	RfC4	FALSE	0	-0.287069	-0.905455	0.331316	24.7295	-1.17517	0.290275	0.444784	-6.37913	0.173008	0.244278
P54353	P54353	dod	TRUE	2	0.381579	-0.450441	1.2136	22.0743	1.16098	0.295523	0.450128	-6.39467	0.175086	0.328669
P54357	P54357	Mlc-c	TRUE	2	2.72639	1.78027	3.67252	23.4501	7.29484	0.000604128	0.0148782	0.238621	0.00578719	0.373743
P54397	P54397	Fkbp39	FALSE	0	0.21617	-0.441195	0.873535	30.7602	0.83246	0.441231	0.591902	-6.71877	0.230232	0.259676
P54622	P54622	mtSSB	FALSE	0	2.93524	2.02279	3.8477	25.5004	8.1434	0.000352411	0.0112515	0.82422	0.00437649	0.360444
P55162	P55162	Hem	FALSE	0	-0.891363	-1.52654	-0.256184	23.9617	-3.55249	0.0149623	0.0760645	-3.32106	0.0295868	0.250912
P55830	P55830	RpS3A	FALSE	0	1.12796	0.490245	1.76568	28.1271	4.47756	0.00575975	0.0494569	-2.26103	0.0192373	0.251914
P55841	P55841	RpL14	FALSE	0	-0.550884	-1.17966	0.0778957	26.9463	-2.21787	0.074581	0.194232	-5.05586	0.0755504	0.248384
P55935	P55935	RpS9	FALSE	0	-0.48884	-1.27938	0.301696	26.8844	-1.56538	0.175294	0.325721	-5.91592	0.126696	0.312282
P56175	P56175	Rtc1	FALSE	0	-0.260767	-0.867871	0.346336	24.4307	-1.08734	0.324098	0.478053	-6.47345	0.185948	0.239821
P56538	P56538	eIF6	FALSE	0	-0.669855	-1.478	0.138288	23.9795	-2.0983	0.0870942	0.213602	-5.21679	0.0830849	0.319237
P91875	P91875	RpI1	FALSE	0	-0.841345	-1.46661	-0.21608	26.7412	-3.40631	0.0176085	0.0840908	-3.50063	0.0327088	0.246996
P91926	P91926	AP-2alpha	FALSE	0	-0.274679	-1.10088	0.551519	24.2963	-0.841619	0.436517	0.58795	-6.71078	0.228695	0.326369
P91928	P91928	Mitofilin	FALSE	0	-0.0612348	-0.788459	0.66599	23.9965	-0.21316	0.839205	0.898838	-7.07661	0.349621	0.287272
P92177	P92177	14-3-3epsilon	FALSE	0	-0.391805	-0.984547	0.200937	23.6348	-1.67332	0.152116	0.29866	-5.77846	0.11617	0.234148
P92204	P92204	Nelf-E	TRUE	4	-0.596084	-1.83734	0.645176	21.4694	-1.21568	0.275743	0.431351	-6.3342	0.167783	0.49033
Q00963	Q00963	beta-Spec	FALSE	0	0.502292	-0.350102	1.35469	27.0726	1.49173	0.193041	0.343321	-6.00783	0.133541	0.336718
Q02427	Q02427	Rbp1	FALSE	0	0.835655	0.152349	1.51896	26.1332	3.0959	0.0251628	0.105064	-3.89219	0.0408667	0.269923
Q04688	Q04688	Ets97D	TRUE	2	-0.574153	-1.90015	0.751845	21.4017	-1.09612	0.32057	0.473332	-6.46422	0.184112	0.523803
Q05344	Q05344	Ssrp	FALSE	0	-0.0438755	-0.67464	0.586889	25.5091	-0.176088	0.866793	0.914176	-7.08507	0.355587	0.249168
Q05856	Q05856	SmB	FALSE	0	2.32728	1.64244	3.01212	26.9877	8.60266	0.000268584	0.00972963	1.11627	0.00378454	0.27053
Q07886	Q07886	Dbp45A	FALSE	0	-0.846262	-1.65068	-0.0418401	22.9429	-2.66315	0.0424254	0.140802	-4.4582	0.0547676	0.317767
Q0E8E8	Q0E8E8	Mpcp2	FALSE	0	-1.18138	-2.9754	0.612638	24.2886	-1.66701	0.153385	0.299929	-5.78658	0.116663	0.708684
Q0E8F8	Q0E8F8	FoxK	FALSE	0	-0.0134604	-0.608509	0.581589	24.3221	-0.0572638	0.956443	0.972882	-7.1014	0.378422	0.23506
Q0E8J0	Q0E8J0	MEP-1	FALSE	0	-0.724751	-1.42746	-0.0220446	24.0422	-2.6109	0.0452708	0.14422	-4.5278	0.0560971	0.277587
Q0E8X6	Q0E8X6	eIF2Bdelta	FALSE	0	-0.423391	-1.08857	0.241791	23.8582	-1.6113	0.16504	0.312992	-5.85782	0.121745	0.262764
Q0E980	Q0E980	CG8547	TRUE	3	2.06465	1.28552	2.84379	22.199	6.70826	0.000905391	0.0175331	-0.205329	0.00681986	0.307778
Q0E9B6	Q0E9B6	RpS11	FALSE	0	0.0324915	-0.957635	1.02262	27.0967	0.0830718	0.936858	0.962808	-7.09926	0.374504	0.391125
Q0IGP7	Q0IGP7	CG34334	TRUE	4	1.22439	-0.627467	3.07624	21.6339	1.67373	0.152034	0.29866	-5.77793	0.11617	0.731529
Q0KHZ6	Q0KHZ6	CG7834	TRUE	1	-0.706325	-1.58398	0.171333	22.4173	-2.0373	0.0943068	0.225185	-5.29865	0.0875902	0.346698
Q0KHZ9	Q0KHZ9	Cnx99A	TRUE	2	1.25312	-0.00849909	2.51474	22.9362	2.51443	0.0510838	0.154965	-4.65681	0.0602767	0.498373
Q0KI68	Q0KI68	nsl1	FALSE	0	0.097767	-0.544345	0.739879	24.6798	0.38544	0.714982	0.80953	-7.01677	0.314883	0.253651
Q1LZ24	Q1LZ24	CG1603	TRUE	2	0.0555837	-0.658126	0.769294	22.4932	0.197152	0.851089	0.90412	-7.08046	0.351676	0.281934
Q23978	Q23978	Myo31DF	FALSE	0	0.271531	-0.54573	1.08879	24.1617	0.841072	0.436798	0.58795	-6.71126	0.228695	0.322839
Q24090	Q24090	Snr1	TRUE	4	1.69383	0.0764668	3.31119	21.9898	2.65117	0.0430603	0.142112	-4.47415	0.0552775	0.638899
Q24113	Q24113	nonA-l	FALSE	0	0.458129	-0.21536	1.13162	24.5893	1.722	0.142678	0.286743	-5.71556	0.111534	0.266045
Q24168	Q24168	Orc2	FALSE	0	0.332695	-0.297454	0.962845	22.4848	1.33653	0.236178	0.390571	-6.1953	0.15192	0.248925
Q24253	Q24253	AP-1-2beta	FALSE	0	-0.215057	-0.954816	0.524702	22.8169	-0.735932	0.493208	0.637777	-6.79879	0.248076	0.292224
Q24318	Q24318	Dp	FALSE	0	1.32996	0.463054	2.19687	23.3641	3.88366	0.0104747	0.0644845	-2.9263	0.0250826	0.342451
Q24319	Q24319	Ost48	FALSE	0	-0.503519	-1.64303	0.635993	25.5515	-1.11859	0.311694	0.46545	-6.4404	0.181046	0.450136
Q24368	Q24368	Iswi	FALSE	0	-0.0680211	-0.911889	0.775847	27.5987	-0.204053	0.84596	0.903533	-7.07883	0.351447	0.33335
Q24472	Q24472	Rbf	TRUE	3	0.126287	-1.6002	1.85277	21.6451	0.18517	0.860013	0.909013	-7.08314	0.353579	0.682005
Q24478	Q24478	Cp190	FALSE	0	0.376965	-0.234578	0.988507	23.567	1.56045	0.176432	0.32605	-5.92213	0.126824	0.241575
Q24491	Q24491	Rsf1	TRUE	3	0.734797	-1.30608	2.77568	22.3163	0.911434	0.401834	0.554576	-6.64773	0.215713	0.806199
Q24492	Q24492	RpA-70	FALSE	0	-0.368878	-1.00331	0.265558	24.5803	-1.47187	0.198114	0.348966	-6.03231	0.135737	0.250619
Q24560	Q24560	betaTub56D	FALSE	0	0.63868	-0.0426048	1.31997	28.1166	2.37317	0.0610978	0.17537	-4.84661	0.0682139	0.269125
Q24572	Q24572	Caf1-55	FALSE	0	0.00124674	-0.611338	0.613831	25.7557	0.00515209	0.996079	0.996483	-7.10332	0.387602	0.241986
Q24595	Q24595	Xpc	FALSE	0	-0.635156	-1.41339	0.143074	23.46	-2.06608	0.090829	0.219415	-5.26005	0.0853459	0.307421
Q27237	Q27237	CG5504	FALSE	0	-0.18837	-0.877648	0.500907	23.0466	-0.691819	0.518346	0.655154	-6.83271	0.254835	0.272282
Q27268	Q27268	Hel25E	FALSE	0	1.22258	0.377647	2.06752	26.0932	3.66294	0.0132596	0.071454	-3.18752	0.0277935	0.333771
Q27272	Q27272	e(y)1	TRUE	2	0.347403	-0.798257	1.49306	21.8525	0.767632	0.475677	0.624596	-6.77337	0.242949	0.452565
Q27294	Q27294	caz	FALSE	0	1.78384	0.92971	2.63797	25.2884	5.28697	0.00275633	0.03408	-1.43958	0.0132561	0.337403
Q27333	Q27333	Alg3	TRUE	4	-2.08364	-3.49456	-0.672708	21.1942	-3.73845	0.0122217	0.070174	-3.0973	0.0272956	0.557353
Q27411	Q27411	Rlb1	TRUE	3	-0.113208	-0.926765	0.700349	21.6717	-0.352261	0.738295	0.824952	-7.03087	0.320882	0.321376
Q29QQ9	Q29QQ9	Rrp42	TRUE	3	0.454915	-0.72553	1.63536	22.0195	0.975572	0.371906	0.52451	-6.58662	0.204019	0.466306
Q29R10	Q29R10	CG7987	TRUE	3	0.146465	-0.945619	1.23855	21.2193	0.339511	0.74734	0.830569	-7.03596	0.323067	0.431401
Q2PDW1	Q2PDW1	CG3662	FALSE	0	0.622749	-0.462231	1.70773	23.1016	1.453	0.203051	0.352718	-6.05545	0.137197	0.428595
Q2PDY2	Q2PDY2	Trl	FALSE	0	0.714243	0.0786571	1.34983	24.9722	2.84477	0.0339579	0.121928	-4.21818	0.0474265	0.251072
Q3YMU0	Q3YMU0	ERp60	FALSE	0	-0.448314	-1.11668	0.220057	25.7469	-1.69801	0.147255	0.292689	-5.74663	0.113847	0.264024
Q400M8	Q400M8	Meltrin	TRUE	1	-0.448858	-1.60487	0.707153	22.6895	-0.982928	0.368591	0.52085	-6.57943	0.202595	0.456654
Q494I2	Q494I2	Rip11	TRUE	4	0.628014	-0.446248	1.70228	21.4392	1.47991	0.196046	0.346372	-6.02242	0.134729	0.424361
Q4AB54	Q4AB54	His1:CG33861	FALSE	0	-0.184147	-0.821305	0.453012	29.6992	-0.73163	0.495622	0.640326	-6.80218	0.249068	0.251694
Q4AB57	Q4AB57	His2A:CG33859	FALSE	0	-0.364857	-1.06154	0.33183	27.8829	-1.32574	0.239486	0.395137	-6.20796	0.153697	0.275209
Q4V5H1	Q4V5H1	CG17266	TRUE	4	-0.700012	-1.31942	-0.0806072	21.18	-2.86092	0.0332998	0.120162	-4.19699	0.0467394	0.244681
Q4V6X9	Q4V6X9	CG17385	TRUE	4	-1.07785	-2.20338	0.0476821	21.4439	-2.42424	0.0572533	0.167727	-4.7779	0.0652409	0.444614
Q53YG3	Q53YG3	Myb	FALSE	0	0.958462	0.209009	1.70792	24.5269	3.23746	0.0213421	0.0941524	-3.71194	0.0366225	0.296053
Q53YH3	Q53YH3	Calr	FALSE	0	0.0502283	-0.728032	0.828489	24.9976	0.16338	0.876302	0.922859	-7.08761	0.358965	0.307433
Q53ZT0	Q53ZT0	DnaJ-1	TRUE	1	1.57957	0.770171	2.38898	23.0658	4.94026	0.0037407	0.0384449	-1.77989	0.0149539	0.319735
Q59DT6	Q59DT6	Rb97D	TRUE	2	0.994176	-0.274694	2.26305	22.1567	1.98345	0.101189	0.234844	-5.37069	0.0913472	0.501236
Q59E30	Q59E30	fax	FALSE	0	-1.34737	-2.03281	-0.661926	22.6088	-4.97611	0.00362193	0.0379777	-1.74392	0.0147722	0.270768
Q59E33	Q59E33	scaf6	FALSE	0	0.376997	-0.218319	0.972313	24.3378	1.60312	0.166824	0.314725	-5.86822	0.122418	0.235165
Q59E36	Q59E36	CoRest	TRUE	3	-0.820379	-1.55223	-0.0885275	21.7693	-2.8377	0.0342503	0.12241	-4.22746	0.0476139	0.2891
Q59E58	Q59E58	zip	FALSE	0	-0.307021	-1.0407	0.426654	26.8647	-1.05935	0.335561	0.48898	-6.50255	0.190199	0.28982
Q5BI50	Q5BI50	Cul4	FALSE	0	-0.177535	-0.776004	0.420934	23.7252	-0.75096	0.484841	0.63151	-6.78685	0.245638	0.23641
Q5EAK6	Q5EAK6	tefu	FALSE	0	-0.813112	-1.44632	-0.179903	23.694	-3.25071	0.0210192	0.0932967	-3.69522	0.0362896	0.250134
Q5LJZ2	Q5LJZ2	Set1	FALSE	0	-0.756064	-1.44277	-0.0693622	23.9488	-2.78718	0.0364228	0.127304	-4.29394	0.0495174	0.271265
Q5U0X8	Q5U0X8	CG12325	FALSE	0	-1.07863	-1.76851	-0.388752	25.1501	-3.95799	0.00969142	0.0633479	-2.84003	0.0246405	0.272519
Q6AWG9	Q6AWG9	CG5098	FALSE	0	-0.0465178	-0.693589	0.600554	24.8501	-0.181987	0.862387	0.910193	-7.08383	0.354038	0.25561
Q6NP69	Q6NP69	gfzf	FALSE	0	-0.455661	-1.05574	0.144419	26.857	-1.92224	0.109644	0.243291	-5.45226	0.094633	0.237047
Q6NP72	Q6NP72	CG13220	TRUE	3	0.127124	-0.757481	1.01173	21.9214	0.363793	0.730155	0.819232	-7.0261	0.318657	0.349442
Q6NQY9	Q6NQY9	CG9143	FALSE	0	0.223105	-0.42917	0.875381	26.4956	0.865872	0.424219	0.575299	-6.6893	0.223774	0.257665
Q709R6	Q709R6	bocks	FALSE	0	1.3216	0.593338	2.04986	23.4984	4.59397	0.00515306	0.0471929	-2.13699	0.0183566	0.287681
Q76NQ0	Q76NQ0	CG33303	FALSE	0	0.177076	-0.537617	0.891768	24.118	0.627212	0.556693	0.683788	-6.87919	0.265973	0.282322
Q7JNE1	Q7JNE1	prod	FALSE	0	1.44383	0.578997	2.30865	26.108	4.22629	0.00737157	0.0552677	-2.53582	0.0214975	0.341629
Q7JQH9	Q7JQH9	whd	FALSE	0	-0.46632	-1.29708	0.364437	23.6644	-1.42097	0.211699	0.362948	-6.09443	0.141176	0.32817
Q7JQN4	Q7JQN4	Rs1	FALSE	0	0.305876	-0.307305	0.919057	27.6569	1.26279	0.259657	0.415165	-6.28087	0.161487	0.242222
Q7JQT9	Q7JQT9	CG1671	FALSE	0	-0.908337	-1.53572	-0.280956	26.0873	-3.66514	0.0132279	0.071454	-3.18488	0.0277935	0.247832
Q7JR58	Q7JR58	Echs1	TRUE	1	-0.69929	-2.23298	0.834402	21.9829	-1.15423	0.298048	0.451124	-6.40202	0.175474	0.605848
Q7JRE4	Q7JRE4	MAN1	FALSE	0	0.0366701	-0.574219	0.647559	24.855	0.151958	0.884867	0.928486	-7.08972	0.361153	0.241317
Q7JRH5	Q7JRH5	CG5726	FALSE	0	0.503958	-1.12141	2.12932	23.5868	0.784907	0.466313	0.615652	-6.75916	0.23947	0.64206
Q7JRJ1	Q7JRJ1	Eaf	TRUE	3	-0.0170495	-0.765562	0.731463	21.6076	-0.0576618	0.956141	0.972882	-7.10138	0.378422	0.295682
Q7JRJ9	Q7JRJ9	Incenp	FALSE	0	0.476929	-0.499638	1.4535	24.0296	1.23631	0.268593	0.425223	-6.31098	0.165399	0.385769
Q7JRK6	Q7JRK6	CG7824	TRUE	2	0.219707	-0.416029	0.855442	21.7749	0.874867	0.419725	0.571885	-6.68122	0.222446	0.251132
Q7JVL3	Q7JVL3	Prp38	FALSE	0	0.594503	-0.121481	1.31049	23.9803	2.10197	0.0866793	0.213148	-5.21186	0.0829081	0.282832
Q7JVP4	Q7JVP4	Br140	FALSE	0	-0.632835	-1.24021	-0.0254602	24.5987	-2.6376	0.0437917	0.142397	-4.49221	0.0553882	0.239929
Q7JVY0	Q7JVY0	coro	TRUE	2	-0.0725708	-0.829138	0.683996	21.5469	-0.242823	0.817313	0.883895	-7.06869	0.343809	0.298863
Q7JW01	Q7JW01	CG15107	TRUE	1	2.84152	2.17585	3.5072	23.3514	10.8059	8.54215e-05	0.00529513	2.31812	0.00205965	0.262959
Q7JWP6	Q7JWP6	HipHop	TRUE	4	-1.02288	-1.7911	-0.254664	21.5271	-3.37066	0.0183312	0.0861211	-3.5449	0.0334985	0.303466
Q7JX87	Q7JX87	Prx2540-2	FALSE	0	1.98012	1.32396	2.63627	25.3272	7.63938	0.000482391	0.0133815	0.484013	0.00520502	0.259199
Q7JXC4	Q7JXC4	P32	TRUE	4	-0.0746838	-1.19984	1.05047	21.5477	-0.16803	0.872819	0.919861	-7.0867	0.357799	0.444466
Q7JXF5	Q7JXF5	Nup62	TRUE	2	-0.429144	-1.47921	0.620917	22.1423	-1.03458	0.345987	0.498152	-6.52788	0.193766	0.414801
Q7JXF7	Q7JXF7	sel	FALSE	0	0.547902	-0.788744	1.88455	21.541	1.03767	0.344669	0.497741	-6.52474	0.193606	0.528009
Q7JXU4	Q7JXU4	Ns2	FALSE	0	0.056308	-0.560885	0.673501	26.9994	0.230953	0.826052	0.890627	-7.07198	0.346427	0.243807
Q7JZ53	Q7JZ53	CG4866	TRUE	1	0.721293	-0.660331	2.10292	22.6502	1.32159	0.240771	0.396355	-6.21283	0.15417	0.545777
Q7JZF5	Q7JZF5	Rpb5	FALSE	0	-0.165159	-0.843388	0.51307	24.9499	-0.616455	0.563251	0.690114	-6.88655	0.268434	0.267918
Q7JZN0	Q7JZN0	Sec61beta	TRUE	2	-0.236754	-1.10279	0.629277	21.7744	-0.692052	0.518211	0.655154	-6.83253	0.254835	0.342104
Q7JZW2	Q7JZW2	RpS15	TRUE	3	1.99619	1.35482	2.63757	22.3527	7.87891	0.00041463	0.0122443	0.648371	0.00476266	0.253359
Q7K012	Q7K012	Bap55	FALSE	0	1.3669	0.737002	1.9968	25.9676	5.49338	0.00231391	0.0312919	-1.2448	0.0121716	0.248827
Q7K0D3	Q7K0D3	CG12909	FALSE	0	-0.0747461	-0.711583	0.562091	25.2636	-0.297122	0.777731	0.8558	-7.05161	0.332881	0.251567
Q7K0D8	Q7K0D8	Nup50	FALSE	0	-0.124153	-0.759293	0.510988	25.8321	-0.494836	0.640657	0.758254	-6.96192	0.294938	0.250897
Q7K0E6	Q7K0E6	AspRS	FALSE	0	-0.531157	-1.14032	0.0780046	25.4633	-2.20732	0.0756051	0.19501	-5.07007	0.075853	0.240634
Q7K0F7	Q7K0F7	CG11200	TRUE	1	-0.175136	-1.2398	0.889528	22.5925	-0.416426	0.693519	0.794845	-7.00253	0.309171	0.420569
Q7K0K1	Q7K0K1	CG2063	FALSE	0	1.74091	1.10691	2.3749	23.8338	6.95125	0.00076305	0.0155512	-0.0172462	0.00604895	0.250445
Q7K0L8	Q7K0L8	FLASH	FALSE	0	1.09781	0.46518	1.73043	25.5141	4.39292	0.00625264	0.051682	-2.35251	0.0201027	0.249904
Q7K0X3	Q7K0X3	Ctr9	FALSE	0	-0.257686	-1.19076	0.675386	24.8957	-0.699117	0.514128	0.653578	-6.82721	0.254222	0.368587
Q7K0X9	Q7K0X9	Syx7	TRUE	4	-0.399035	-1.55093	0.752859	21.572	-0.876947	0.418691	0.571139	-6.67934	0.222156	0.455028
Q7K0Y1	Q7K0Y1	CG5033	FALSE	0	1.60071	0.499199	2.70223	26.6478	3.67873	0.0130345	0.071454	-3.16858	0.0277935	0.435126
Q7K159	Q7K159	mip40	FALSE	0	1.01653	0.352581	1.68048	23.3183	3.87579	0.0105617	0.0644845	-2.93548	0.0250826	0.262277
Q7K180	Q7K180	Map60	FALSE	0	0.461268	-0.288714	1.21125	23.3864	1.55696	0.177241	0.32671	-5.92652	0.12708	0.296262
Q7K264	Q7K264	CG8569	FALSE	0	-0.488882	-1.15685	0.179083	23.1278	-1.85279	0.120119	0.256739	-5.54428	0.0998638	0.263863
Q7K2B0	Q7K2B0	CG7137	FALSE	0	0.131645	-0.49561	0.758899	27.1356	0.531293	0.616842	0.738272	-6.94088	0.287166	0.247782
Q7K2D2	Q7K2D2	DCTN2-p50	TRUE	4	0.253317	-0.941743	1.44838	21.8051	0.536598	0.613419	0.734782	-6.9377	0.285809	0.472079
Q7K2K2	Q7K2K2	CG10265	FALSE	0	-0.0123978	-0.907265	0.88247	22.6325	-0.0350721	0.973312	0.982136	-7.10261	0.382022	0.353496
Q7K2X8	Q7K2X8	Nup44A	FALSE	0	0.173079	-1.08488	1.43103	25.5679	0.3483	0.7411	0.82681	-7.03247	0.321604	0.496924
Q7K332	Q7K332	CG30159	FALSE	0	-0.406575	-1.26416	0.451011	23.2156	-1.20016	0.281234	0.435977	-6.35152	0.169582	0.338769
Q7K3D4	Q7K3D4	zda	TRUE	1	-0.658164	-1.85801	0.541679	21.6985	-1.38862	0.220782	0.373214	-6.13341	0.145169	0.473968
Q7K3D8	Q7K3D8	DMAP1	FALSE	0	0.248802	-0.487752	0.985356	23.4292	0.855114	0.429641	0.582108	-6.69888	0.226422	0.290958
Q7K3J0	Q7K3J0	CCT8	FALSE	0	-0.30069	-0.893569	0.292188	23.3404	-1.28389	0.25273	0.409978	-6.25664	0.159469	0.234202
Q7K3M5	Q7K3M5	Dhx15	FALSE	0	0.781641	0.0231699	1.54011	26.754	2.60881	0.0453884	0.14422	-4.53058	0.0560971	0.299615
Q7K4B2	Q7K4B2	l(2)k09848	FALSE	0	1.52829	0.850746	2.20584	24.7719	5.71008	0.0019357	0.0285812	-1.04633	0.0111172	0.267648
Q7K4L8	Q7K4L8	CG7878	FALSE	0	0.109795	-0.538032	0.757622	25.9074	0.429042	0.684869	0.790369	-6.99643	0.30743	0.255908
Q7K4M4	Q7K4M4	tef	FALSE	0	-0.824609	-1.50545	-0.143766	21.5383	-3.06602	0.026063	0.10639	-3.93056	0.0413827	0.268951
Q7K4R2	Q7K4R2	CG11504	TRUE	3	0.502079	-0.127421	1.13158	21.6787	2.01907	0.0965804	0.228726	-5.32306	0.0889678	0.248669
Q7K5K3	Q7K5K3	Pdhb	TRUE	4	-0.923215	-1.75215	-0.0942771	21.4577	-2.81939	0.0350206	0.124203	-4.25152	0.0483113	0.327452
Q7K5M2	Q7K5M2	CG10139	FALSE	0	0.858462	0.225912	1.49101	26.5455	3.43558	0.017039	0.0824901	-3.46442	0.0320862	0.249874
Q7KAH0	Q7KAH0	jim	FALSE	0	1.49058	0.589523	2.39164	23.4824	4.18772	0.0076623	0.0562568	-2.57887	0.0218822	0.355941
Q7KHK9	Q7KHK9	Strica	FALSE	0	-0.525021	-1.15075	0.100712	23.3701	-2.12404	0.0842257	0.210129	-5.18219	0.0817338	0.247181
Q7KJA9	Q7KJA9	sxc	TRUE	3	-0.371885	-1.2524	0.508626	21.6438	-1.06918	0.331498	0.48494	-6.49239	0.188627	0.347824
Q7KK96	Q7KK96	SMC2	FALSE	0	-0.487914	-1.09352	0.117688	25.7437	-2.03953	0.0940317	0.224899	-5.29565	0.087479	0.239228
Q7KKH3	Q7KKH3	Mys45A	FALSE	0	-0.481792	-1.07886	0.115273	23.9337	-2.04274	0.0936385	0.224701	-5.29135	0.0874021	0.235856
Q7KKI0	Q7KKI0	CCT5	FALSE	0	0.449779	-0.44872	1.34828	23.1081	1.26723	0.258185	0.414548	-6.27579	0.161247	0.35493
Q7KLW9	Q7KLW9	Prp19	FALSE	0	-0.373161	-0.990995	0.244673	27.3972	-1.52897	0.183862	0.333812	-5.96157	0.129843	0.24406
Q7KM04	Q7KM04	Eip63E	FALSE	0	-1.47308	-2.1424	-0.80376	22.565	-5.57143	0.00216855	0.0307636	-1.17262	0.0119661	0.264399
Q7KMI3	Q7KMI3	CG8878	TRUE	1	0.931547	0.0840437	1.77905	22.9011	2.78252	0.0366308	0.127722	-4.30009	0.0496801	0.334786
Q7KMJ6	Q7KMJ6	nito	FALSE	0	-0.172258	-0.840862	0.496346	27.7423	-0.652206	0.541646	0.673913	-6.86167	0.262132	0.264116
Q7KMQ0	Q7KMQ0	Rpt1	FALSE	0	0.741083	-0.0876818	1.56985	23.1035	2.26366	0.0703048	0.189263	-4.99416	0.0736176	0.327383
Q7KN62	Q7KN62	TER94	FALSE	0	2.38857	1.69265	3.08449	24.6476	8.68871	0.000255621	0.00972963	1.1692	0.00378454	0.274905
Q7KN75	Q7KN75	Dp1	FALSE	0	-0.280688	-0.890819	0.329444	25.5634	-1.16459	0.294179	0.448554	-6.39073	0.174474	0.241017
Q7KN94	Q7KN94	wal	TRUE	1	-0.944439	-2.12483	0.23595	22.0591	-2.02546	0.0957769	0.227568	-5.31451	0.0885173	0.466284
Q7KN97	Q7KN97	PCB	FALSE	0	-5.38841	-6.01556	-4.76127	25.7716	-21.7503	2.30787e-06	0.00185023	5.56643	0.000719684	0.24774
Q7KND8	Q7KND8	Mad1	FALSE	0	-0.586825	-1.24332	0.0696677	24.599	-2.26284	0.0703788	0.189263	-4.99526	0.0736176	0.259331
Q7KNS5	Q7KNS5	qkr54B	TRUE	3	-0.687472	-2.15296	0.778015	21.6025	-1.18754	0.285769	0.439794	-6.36551	0.171067	0.578905
Q7KQM8	Q7KQM8	CG11076	FALSE	0	1.63652	0.970539	2.3025	24.8631	6.22063	0.00129653	0.0223343	-0.601796	0.00868739	0.263079
Q7KQZ4	Q7KQZ4	lola	FALSE	0	0.00179973	-0.898912	0.902511	25.5362	0.00505821	0.99615	0.996483	-7.10332	0.387602	0.355804
Q7KRS9	Q7KRS9	CG1815	FALSE	0	-0.368625	-1.01425	0.276999	24.7893	-1.44537	0.20508	0.355389	-6.06477	0.138236	0.255038
Q7KSQ0	Q7KSQ0	sea	FALSE	0	0.0119193	-0.584956	0.608794	23.7153	0.0505526	0.961543	0.975703	-7.10183	0.379519	0.235781
Q7KSU6	Q7KSU6	CG8036	FALSE	0	-0.449449	-1.05188	0.152979	24.3919	-1.88864	0.114589	0.250469	-5.49685	0.0974252	0.237974
Q7KSZ0	Q7KSZ0	Alh	TRUE	2	0.973732	-0.112597	2.06006	22.2475	2.2691	0.0698141	0.188824	-4.98682	0.073447	0.429127
Q7KTT0	Q7KTT0	Xe7	TRUE	2	-0.948887	-2.03578	0.138006	21.4355	-2.21005	0.0753385	0.194769	-5.06639	0.0757593	0.429351
Q7KU01	Q7KU01	PNUTS	FALSE	0	0.644694	-0.0456509	1.33504	24.5953	2.36408	0.0618109	0.175985	-4.85885	0.068453	0.272704
Q7KUB0	Q7KUB0	Idh	TRUE	1	-0.227982	-0.953791	0.497826	21.3208	-0.795159	0.460819	0.610069	-6.75061	0.237299	0.286713
Q7KUT2	Q7KUT2	Lon	FALSE	0	0.299687	-0.356673	0.956046	22.7571	1.15585	0.297442	0.450679	-6.40026	0.175301	0.259279
Q7KVB1	Q7KVB1	ABCB7	FALSE	0	-0.54561	-1.39099	0.299774	22.8459	-1.63382	0.160228	0.307085	-5.82912	0.119447	0.333948
Q7KVP9	Q7KVP9	Xpd	TRUE	1	-0.394305	-1.02155	0.232942	22.1374	-1.59136	0.169419	0.316526	-5.88312	0.123119	0.247779
Q7KVQ0	Q7KVQ0	CG4038	FALSE	0	1.05844	0.172741	1.94415	28.9193	3.0252	0.0273516	0.109104	-3.98318	0.042438	0.349876
Q7KVS9	Q7KVS9	Trf4-1	TRUE	1	-0.264363	-1.22929	0.700567	22.163	-0.693553	0.517342	0.655154	-6.83141	0.254835	0.381172
Q7KVW2	Q7KVW2	Pop1	FALSE	0	-0.638793	-1.34415	0.0665667	22.8835	-2.29258	0.0677379	0.185287	-4.95517	0.072071	0.278635
Q7KVX5	Q7KVX5	Vap33	FALSE	0	0.0881692	-0.516691	0.693029	26.7623	0.369009	0.726486	0.817368	-7.0239	0.317932	0.238935
Q7KW39	Q7KW39	CG17896	TRUE	4	-1.52134	-2.65702	-0.385662	21.3784	-3.39114	0.0179121	0.0852593	-3.51945	0.0331633	0.448622
Q7KY08	Q7KY08	AGO1	TRUE	4	-1.08062	-2.44941	0.288161	21.1208	-1.99855	0.0992082	0.232157	-5.35052	0.0903023	0.540705
Q7PL83	Q7PL83	Spf45	TRUE	1	0.552416	-0.111945	1.21678	23.036	2.10493	0.0863459	0.212849	-5.20788	0.082792	0.262439
Q7PLI7	Q7PLI7	CG17528	TRUE	3	-0.616722	-1.29826	0.0648126	21.8793	-2.29074	0.0678978	0.185374	-4.95765	0.0721049	0.269224
Q7PLL1	Q7PLL1	eIF4B	TRUE	3	-0.341544	-1.21558	0.532494	21.4496	-0.989216	0.365776	0.517884	-6.57325	0.201442	0.345268
Q7PLL6	Q7PLL6	l(3)80Fj	FALSE	0	-0.85646	-1.45508	-0.257841	25.0414	-3.62186	0.0138658	0.0724887	-3.23697	0.028196	0.23647
Q7PLS8	Q7PLS8	IntS3	FALSE	0	-0.453425	-1.21851	0.311666	25.3466	-1.50026	0.1909	0.341027	-5.99727	0.13265	0.30223
Q7YU84	Q7YU84	z	TRUE	3	-0.393533	-1.21191	0.424842	21.7029	-1.21732	0.27517	0.431064	-6.33236	0.167671	0.323279
Q7YU88	Q7YU88	CG14442	FALSE	0	0.982566	-0.146937	2.11207	23.163	2.20216	0.076111	0.195965	-5.07702	0.0762247	0.446183
Q7YZ99	Q7YZ99	Srrm234	FALSE	0	1.1621	0.224531	2.09968	27.6482	3.13772	0.0239599	0.102321	-3.83865	0.0397998	0.370365
Q7YZA2	Q7YZA2	CG7065	FALSE	0	0.478013	-0.418587	1.37461	25.5643	1.34963	0.232214	0.385336	-6.17983	0.149884	0.35418
Q7YZH1	Q7YZH1	rno	TRUE	1	-0.113723	-1.27059	1.04314	22.6235	-0.248851	0.812886	0.881083	-7.06696	0.342715	0.456991
Q867Z4	Q867Z4	lola	TRUE	3	0.992247	0.284946	1.69955	22.3557	3.55132	0.0149816	0.0760645	-3.32248	0.0295868	0.279402
Q86B47	Q86B47	CG8611	FALSE	0	-0.141575	-1.06716	0.784004	26.3729	-0.387212	0.713746	0.809233	-7.01598	0.314768	0.365628
Q86B87	Q86B87	mod(mdg4)	FALSE	0	1.03125	0.324224	1.73827	27.1486	3.69235	0.0128438	0.070935	-3.15227	0.0275916	0.279293
Q86B99	Q86B99	CG31211	TRUE	4	-0.0928612	-1.17488	0.989155	21.678	-0.217258	0.83617	0.896251	-7.07557	0.348615	0.427424
Q86BI3	Q86BI3	Zn72D	FALSE	0	0.264304	-0.391389	0.919996	26.3426	1.02042	0.352067	0.505253	-6.54219	0.196528	0.259015
Q86BP3	Q86BP3	Tailor	TRUE	4	0.492157	-0.668752	1.65307	21.3542	1.0732	0.329847	0.483695	-6.48821	0.188143	0.458589
Q86BS3	Q86BS3	Chro	FALSE	0	-0.206888	-0.79897	0.385194	27.3323	-0.884561	0.414923	0.56748	-6.67244	0.220733	0.233888
Q86CW5	Q86CW5	Hmr	FALSE	0	-0.382633	-1.00152	0.236251	24.4986	-1.56512	0.175354	0.325721	-5.91625	0.126696	0.244475
Q8I0G5	Q8I0G5	gammaCOP	FALSE	0	-0.460158	-1.08517	0.164857	23.0146	-1.86377	0.118397	0.255149	-5.52977	0.0992453	0.246897
Q8I7C3	Q8I7C3	Lasp	TRUE	4	-0.749663	-1.5483	0.0489731	21.0415	-2.37625	0.0608586	0.17537	-4.84246	0.0682139	0.315482
Q8I8U7	Q8I8U7	Nipped-A	FALSE	0	-0.791711	-1.72719	0.143766	22.8658	-2.14244	0.082236	0.206589	-5.15744	0.0803571	0.369538
Q8I934	Q8I934	CG33523	TRUE	1	0.387607	-0.411832	1.18705	22.6464	1.22739	0.271665	0.427454	-6.32105	0.166267	0.315799
Q8I937	Q8I937	CG32409	FALSE	0	0.278816	-0.422795	0.980428	27.2037	1.006	0.35835	0.511714	-6.55663	0.199042	0.277155
Q8IH00	Q8IH00	Mat89Ba	FALSE	0	-0.385478	-1.00411	0.233155	26.9976	-1.5774	0.172552	0.321756	-5.90077	0.125154	0.244376
Q8IH14	Q8IH14	ssx	TRUE	2	-0.0158513	-0.969092	0.937389	21.4956	-0.0420957	0.967971	0.978794	-7.10229	0.380722	0.376554
Q8IHB0	Q8IHB0	gish	FALSE	0	0.423925	-0.33714	1.18499	23.2167	1.41008	0.214718	0.365956	-6.1076	0.142346	0.30064
Q8IMI7	Q8IMI7	RpS7	FALSE	0	0.466955	-0.152608	1.08652	26.8522	1.90794	0.111722	0.246315	-5.47125	0.0958093	0.244743
Q8IMP6	Q8IMP6	CG5815	FALSE	0	1.75657	0.866376	2.64676	23.4862	4.99523	0.00356036	0.0378651	-1.7248	0.0147284	0.351649
Q8IMR3	Q8IMR3	Yif1	TRUE	2	0.16296	-1.42955	1.75547	21.0099	0.259044	0.805418	0.877805	-7.06394	0.34144	0.629084
Q8IMV6	Q8IMV6	Saf-B	FALSE	0	1.62207	0.906705	2.33744	27.7433	5.74006	0.00188925	0.028183	-1.01935	0.0109623	0.282588
Q8IMX8	Q8IMX8	LSm3	TRUE	3	3.61471	2.61851	4.61092	22.8773	9.18543	0.000193719	0.00900364	1.46436	0.00350215	0.393527
Q8IN56	Q8IN56	CG42668	FALSE	0	-0.147645	-0.94184	0.646549	25.0688	-0.470616	0.656753	0.773223	-6.97515	0.300761	0.313727
Q8INM3	Q8INM3	sle	FALSE	0	0.274497	-0.325332	0.874326	29.6567	1.15847	0.29646	0.45043	-6.39741	0.175204	0.236948
Q8IP94	Q8IP94	ThrRS	TRUE	1	-1.35856	-2.66958	-0.0475524	22.5121	-2.6233	0.0445769	0.143659	-4.51126	0.055879	0.517883
Q8IPE8	Q8IPE8	Mtpalpha	FALSE	0	-0.660335	-1.29732	-0.0233497	25.4103	-2.62428	0.0445229	0.143659	-4.50996	0.055879	0.251625
Q8IPX7	Q8IPX7	Rrp40	FALSE	0	0.129366	-0.46496	0.723691	23.4795	0.551023	0.604167	0.727313	-6.92893	0.282903	0.234774
Q8IQ04	Q8IQ04	CG31955	TRUE	3	1.20076	0.605595	1.79592	22.1152	5.10734	0.00322285	0.0364333	-1.6138	0.0141715	0.235104
Q8IQ05	Q8IQ05	cutlet	TRUE	3	0.408904	-0.531563	1.34937	21.2582	1.10066	0.318761	0.473074	-6.45944	0.184012	0.371509
Q8IQ71	Q8IQ71	dikar	TRUE	1	0.117884	-0.579621	0.815389	21.9861	0.427841	0.68569	0.790369	-6.99702	0.30743	0.275532
Q8IQB7	Q8IQB7	CG32032	FALSE	0	2.83378	2.21727	3.4503	22.3225	11.6358	5.8629e-05	0.00403982	2.69998	0.00157137	0.24354
Q8IQQ9	Q8IQQ9	CG6512	FALSE	0	-0.513671	-1.1895	0.162154	23.7848	-1.92409	0.109378	0.243291	-5.4498	0.094633	0.266968
Q8IQV5	Q8IQV5	CG17233	TRUE	4	-0.141242	-0.937335	0.654851	21.2407	-0.449133	0.671207	0.785155	-6.98638	0.305402	0.314477
Q8IQV9	Q8IQV9	Nup205	FALSE	0	-1.14525	-1.91104	-0.379446	28.0296	-3.7858	0.0116179	0.068617	-3.04118	0.02669	0.30251
Q8IQZ4	Q8IQZ4	CG32554	FALSE	0	0.69536	-0.183487	1.57421	22.5628	2.00295	0.0986375	0.232079	-5.34462	0.0902717	0.347167
Q8IQZ8	Q8IQZ8	Fim	FALSE	0	-1.43546	-2.27348	-0.597436	22.7012	-4.3362	0.00661006	0.0525181	-2.41443	0.020428	0.33104
Q8IRC0	Q8IRC0	ens	TRUE	1	1.33299	0.210807	2.45518	22.8801	3.00703	0.0279478	0.109637	-4.00667	0.0426454	0.443293
Q8IRG6	Q8IRG6	dre4	FALSE	0	-0.423078	-1.09631	0.250149	27.1972	-1.59087	0.169528	0.316526	-5.88375	0.123119	0.265942
Q8IRI5	Q8IRI5	trio	FALSE	0	-1.41419	-2.555	-0.273381	23.1418	-3.13812	0.0239488	0.102321	-3.83815	0.0397998	0.450648
Q8IRJ8	Q8IRJ8	thoc7	TRUE	2	0.254303	-0.723135	1.23174	22.7829	0.658623	0.537825	0.670609	-6.85707	0.260847	0.386113
Q8MKK1	Q8MKK1	AIMP3	TRUE	2	1.11903	-0.450031	2.68809	22.6628	1.80541	0.127843	0.265788	-5.60666	0.103383	0.619818
Q8MKK5	Q8MKK5	kcc	TRUE	4	-0.81577	-1.94695	0.315411	21.08	-1.82562	0.124488	0.263355	-5.58009	0.102437	0.446846
Q8MLV1	Q8MLV1	LBR	FALSE	0	-0.543424	-1.14708	0.060234	24.8029	-2.27889	0.0689405	0.186811	-4.97363	0.0726637	0.238461
Q8MLW2	Q8MLW2	dom	FALSE	0	0.632014	-0.174888	1.43891	25.2081	1.98281	0.101273	0.234844	-5.37155	0.0913472	0.318747
Q8MMD3	Q8MMD3	Eps-15	FALSE	0	-0.309875	-1.26132	0.641576	23.2493	-0.824469	0.445374	0.594479	-6.72568	0.231235	0.375847
Q8MRG6	Q8MRG6	Prp3	FALSE	0	-0.41781	-1.04773	0.212108	23.4455	-1.67907	0.150969	0.298039	-5.77106	0.115928	0.248834
Q8MRW1	Q8MRW1	Tim23	TRUE	1	1.50121	0.195089	2.80733	23.5202	2.9096	0.0314004	0.118266	-4.13331	0.0460021	0.515951
Q8MS38	Q8MS38	CG33217	FALSE	0	-0.975555	-1.66003	-0.291083	25.5622	-3.60803	0.0140769	0.0724887	-3.25367	0.028196	0.270384
Q8MSU4	Q8MSU4	Sym	FALSE	0	-0.116185	-0.745276	0.512907	23.8297	-0.46753	0.658819	0.774181	-6.97679	0.301133	0.248507
Q8MSV2	Q8MSV2	shep	TRUE	3	0.260069	-1.55499	2.07513	21.5495	0.36272	0.730911	0.819232	-7.02655	0.318657	0.716996
Q8MSW0	Q8MSW0	IleRS	FALSE	0	-0.661362	-1.77084	0.448115	27.4518	-1.50902	0.188726	0.337978	-5.9864	0.131463	0.438272
Q8MSW9	Q8MSW9	U3-55K	FALSE	0	0.0594895	-0.940158	1.05914	26.9408	0.15065	0.88585	0.928486	-7.08996	0.361153	0.394886
Q8MT06	Q8MT06	Ns1	FALSE	0	1.45359	0.829205	2.07799	26.9292	5.89335	0.00167115	0.0260017	-0.883126	0.0101139	0.24665
Q8MT58	Q8MT58	Cndp2	TRUE	1	-0.780429	-1.51067	-0.0501838	21.7401	-2.70545	0.0402647	0.136495	-4.40203	0.0530925	0.288466
Q8MZI3	Q8MZI3	CG10077	FALSE	0	0.289046	-1.00401	1.5821	25.2361	0.565882	0.594723	0.720137	-6.91967	0.280112	0.510789
Q8ST83	Q8ST83	pho	TRUE	1	0.774314	-0.265386	1.81401	21.9933	1.88531	0.115091	0.250809	-5.50126	0.0975573	0.410708
Q8STG9	Q8STG9	Sec61alpha	FALSE	0	-0.0352009	-0.744901	0.674499	23.4623	-0.125561	0.90473	0.941154	-7.09404	0.366081	0.28035
Q8STI6	Q8STI6	CG1142	FALSE	0	2.47183	1.80139	3.14227	24.1176	9.33328	0.000178836	0.00900364	1.54894	0.00350215	0.26484
Q8SWS7	Q8SWS7	vito	TRUE	1	1.44969	0.3255	2.57387	22.9706	3.26445	0.0206898	0.0921173	-3.67789	0.0358309	0.444082
Q8SWW4	Q8SWW4	CG16972	FALSE	0	-0.17788	-0.941353	0.585593	26.4502	-0.589804	0.579705	0.704902	-6.90432	0.274186	0.301591
Q8SXM8	Q8SXM8	LysRS	FALSE	0	-0.55119	-1.19251	0.0901326	24.9881	-2.1757	0.0787631	0.200299	-5.11266	0.0779104	0.253339
Q8SXU0	Q8SXU0	CG11555	FALSE	0	0.687198	-0.127944	1.50234	23.6243	2.13414	0.083127	0.208105	-5.1686	0.0809467	0.322002
Q8SY39	Q8SY39	CG32344	FALSE	0	-0.195573	-0.913415	0.522269	27.1568	-0.689692	0.51958	0.656049	-6.8343	0.255183	0.283566
Q8SY53	Q8SY53	Ostgamma	FALSE	0	-1.02236	-1.65001	-0.394705	24.6859	-4.12343	0.00817654	0.0580688	-2.65113	0.022587	0.247938
Q8SZ28	Q8SZ28	CG44250	TRUE	1	0.934556	-0.777437	2.64655	23.0083	1.3819	0.222714	0.37604	-6.14145	0.146269	0.676281
Q8SZY9	Q8SZY9	CG32075	FALSE	0	-0.244742	-0.905155	0.41567	25.886	-0.938141	0.389148	0.542482	-6.62264	0.21101	0.26088
Q8T060	Q8T060	AIMP2	FALSE	0	0.301374	-0.294745	0.897493	23.7199	1.27982	0.254056	0.411667	-6.26134	0.160126	0.235482
Q8T076	Q8T076	Rcd1	FALSE	0	-0.322583	-0.914662	0.269496	25.2031	-1.37923	0.223487	0.376569	-6.14465	0.146474	0.233886
Q8T079	Q8T079	Ndf	FALSE	0	-0.510307	-1.11395	0.0933384	28.3119	-2.14005	0.0824912	0.206871	-5.16065	0.0804668	0.238455
Q8T092	Q8T092	CG4282	TRUE	1	-0.361595	-1.23286	0.50967	21.63	-1.05062	0.339204	0.492303	-6.51152	0.191491	0.344172
Q8T0E7	Q8T0E7	CG10984	TRUE	4	-0.759947	-1.35865	-0.161244	21.1371	-3.21326	0.0219466	0.0957717	-3.74257	0.0372523	0.236503
Q8T4A9	Q8T4A9	Rrp45	FALSE	0	2.62759	1.85565	3.39953	23.5218	8.61683	0.000266397	0.00972963	1.12502	0.00378454	0.304937
Q8T6B9	Q8T6B9	hfp	FALSE	0	0.129731	-0.503829	0.763291	24.6167	0.518358	0.625234	0.74462	-6.9485	0.289635	0.250272
Q8T6I0	Q8T6I0	Past1	TRUE	1	0.332239	-0.576168	1.24065	22.5881	0.925859	0.394942	0.547921	-6.63424	0.213125	0.358844
Q94513	Q94513	BEAF-32	FALSE	0	1.33517	0.651621	2.01871	26.1945	4.94474	0.00372563	0.0384449	-1.77539	0.0149539	0.270017
Q94517	Q94517	HDAC1	FALSE	0	0.275948	-0.389462	0.941358	25.0552	1.04981	0.339543	0.492303	-6.51234	0.191491	0.262854
Q94522	Q94522	Scsalpha1	TRUE	1	1.82061	0.196311	3.4449	22.8677	2.83743	0.0342613	0.12241	-4.2278	0.0476139	0.641638
Q94523	Q94523	SdhA	FALSE	0	0.694495	0.0177849	1.3712	23.4922	2.59801	0.0460038	0.145626	-4.545	0.0566442	0.267318
Q94524	Q94524	Dlc90F	TRUE	4	0.599939	-0.516204	1.71608	21.7332	1.3607	0.228915	0.382053	-6.16672	0.148607	0.440905
Q94883	Q94883	Dref	FALSE	0	0.353944	-0.403991	1.11188	24.6057	1.18216	0.28772	0.441496	-6.37144	0.171729	0.299404
Q94901	Q94901	lark	FALSE	0	1.24641	0.637137	1.85569	27.3056	5.17871	0.00302729	0.034492	-1.54404	0.0134164	0.24068
Q95PE4	Q95PE4	Mpp6	TRUE	2	0.936189	0.128611	1.74377	22.0489	2.93463	0.0304703	0.116334	-4.10066	0.0452504	0.319014
Q95RB1	Q95RB1	CG14641	FALSE	0	1.51714	0.488813	2.54547	24.9976	3.73481	0.0122695	0.070174	-3.10163	0.0272956	0.406217
Q95RF6	Q95RF6	Tom20	TRUE	2	-0.323105	-1.35815	0.711937	21.9551	-0.790243	0.463448	0.612988	-6.75472	0.238434	0.408868
Q95RI7	Q95RI7	CG17454	TRUE	1	1.08316	-0.38854	2.55486	22.7422	1.86315	0.118493	0.255149	-5.53059	0.0992453	0.581359
Q95RJ9	Q95RJ9	ebi	TRUE	2	0.805598	-0.569173	2.18037	22.2805	1.48341	0.19515	0.345632	-6.0181	0.134441	0.54307
Q95RQ8	Q95RQ8	pita	FALSE	0	-0.123528	-0.827224	0.580169	25.6767	-0.444379	0.674427	0.78684	-6.98879	0.306057	0.277978
Q95RU8	Q95RU8	G9a	FALSE	0	-0.751093	-1.54268	0.0404961	23.1856	-2.40198	0.0588964	0.171617	-4.80784	0.0667538	0.312698
Q95RV3	Q95RV3	Lhr	TRUE	2	0.994473	-0.617174	2.60612	21.8218	1.56206	0.176059	0.325777	-5.9201	0.126718	0.636642
Q95SK3	Q95SK3	CG30291	TRUE	3	-0.244716	-0.857646	0.368213	21.2358	-1.01071	0.356286	0.509791	-6.55192	0.198294	0.242123
Q95T98	Q95T98	CG31523	TRUE	1	-0.307983	-1.24939	0.633428	22.6237	-0.828174	0.443449	0.594055	-6.72248	0.23107	0.371882
Q95TS5	Q95TS5	IntS9	TRUE	4	0.857169	-0.0379608	1.7523	21.5671	2.42413	0.0572614	0.167727	-4.77805	0.0652409	0.353599
Q95WY3	Q95WY3	Nop56	FALSE	0	-0.59102	-1.1983	0.0162626	28.5828	-2.46369	0.0544611	0.161818	-4.72488	0.0629423	0.239892
Q960E4	Q960E4	CG8929	TRUE	1	1.7499	0.778475	2.72132	23.5776	4.56016	0.00532137	0.0481251	-2.17281	0.0187192	0.383736
Q960S0	Q960S0	BtbVII	FALSE	0	0.559493	-0.0448295	1.16382	24.0982	2.34369	0.0634423	0.177565	-4.88631	0.0690675	0.238723
Q960W6	Q960W6	CG8306	FALSE	0	-0.978508	-1.59152	-0.365492	23.2333	-4.0408	0.00889644	0.0601549	-2.74494	0.0233985	0.242157
Q961C3	Q961C3	CG8478	FALSE	0	0.175149	-0.713926	1.06422	24.8743	0.498706	0.638106	0.756215	-6.95975	0.294145	0.351208
Q961D1	Q961D1	CycK	FALSE	0	1.71631	1.0147	2.41792	24.2385	6.1926	0.00132447	0.0225472	-0.625397	0.00877019	0.277155
Q963E5	Q963E5	par-1	FALSE	0	0.521776	-0.209586	1.25314	25.4939	1.80604	0.127738	0.265788	-5.60584	0.103383	0.288907
Q9GU68	Q9GU68	eEF5	FALSE	0	0.455097	-0.389871	1.30006	23.3651	1.36345	0.228102	0.382053	-6.16345	0.148607	0.333784
Q9GYU8	Q9GYU8	mbo	FALSE	0	-0.498319	-1.14518	0.148542	26.1382	-1.95016	0.1057	0.23898	-5.41509	0.0929562	0.255526
Q9I7F7	Q9I7F7	Ack-like	TRUE	3	-1.12602	-2.10128	-0.150759	21.4123	-2.92281	0.0309058	0.117686	-4.11608	0.0457764	0.385253
Q9I7H8	Q9I7H8	CG18766	TRUE	3	1.54551	0.769612	2.32141	22.4176	5.04246	0.00341343	0.0375112	-1.67783	0.0145907	0.306499
Q9I7K0	Q9I7K0	Jupiter	TRUE	3	0.591531	-0.473256	1.65632	21.6055	1.40634	0.215763	0.366443	-6.11211	0.142535	0.420618
Q9I7R7	Q9I7R7	CG18809	TRUE	2	-0.17929	-1.54538	1.1868	21.5361	-0.33224	0.752518	0.834968	-7.03879	0.324778	0.53964
Q9I7T7	Q9I7T7	Larp4B	TRUE	1	0.380515	-0.460773	1.2218	22.1327	1.14499	0.301536	0.45403	-6.41204	0.176604	0.33233
Q9I7W5	Q9I7W5	Sas10	FALSE	0	1.8842	0.916105	2.8523	26.7955	4.92701	0.00378574	0.0384449	-1.79323	0.0149539	0.382423
Q9I7Z8	Q9I7Z8	CG18273	FALSE	0	-0.761132	-1.37578	-0.146484	25.3019	-3.13479	0.0240423	0.102321	-3.8424	0.0397998	0.242802
Q9NBD7	Q9NBD7	chb	FALSE	0	-0.687551	-1.29089	-0.0842069	25.5819	-2.88479	0.0323529	0.118819	-4.16573	0.0462171	0.238336
Q9NCC3	Q9NCC3	SH3PX1	TRUE	1	0.521944	-0.327794	1.37168	22.3926	1.55494	0.177711	0.326882	-5.92905	0.127147	0.335668
Q9NG98	Q9NG98	Top3alpha	FALSE	0	-0.706993	-1.30323	-0.110756	21.6565	-3.00173	0.0281245	0.10999	-4.01354	0.0427827	0.235529
Q9NKV0	Q9NKV0	Mlf	TRUE	1	2.16007	1.2323	3.08785	23.1858	5.89388	0.00167045	0.0260017	-0.88266	0.0101139	0.366494
Q9U1H9	Q9U1H9	sbr	FALSE	0	-0.412781	-1.03678	0.211222	24.1854	-1.67459	0.151863	0.29866	-5.77683	0.11617	0.246497
Q9U3V9	Q9U3V9	xmas	FALSE	0	-0.618257	-1.34876	0.112247	24.8441	-2.1425	0.0822292	0.206589	-5.15735	0.0803571	0.288568
Q9U405	Q9U405	grau	TRUE	3	0.532006	-0.401455	1.46547	21.7806	1.44276	0.205778	0.35556	-6.06795	0.138302	0.368741
Q9U5L1	Q9U5L1	SrpRalpha	FALSE	0	0.190686	-0.969539	1.35091	24.8846	0.416056	0.693773	0.794845	-7.0027	0.309171	0.458319
Q9U9Q1	Q9U9Q1	RfC38	FALSE	0	-0.23005	-0.856787	0.396688	24.9795	-0.929203	0.393358	0.546771	-6.63109	0.212678	0.247577
Q9U9Q2	Q9U9Q2	Neos	TRUE	1	1.57473	0.113429	3.03603	22.0748	2.72798	0.0391631	0.134287	-4.37217	0.0522335	0.57725
Q9U9Q4	Q9U9Q4	eIF3h	FALSE	0	-0.00141724	-0.758854	0.75602	23.3524	-0.00473665	0.996395	0.996483	-7.10333	0.387602	0.299207
Q9V3A7	Q9V3A7	glu	FALSE	0	0.0246933	-0.593704	0.64309	25.2185	0.101085	0.923217	0.95353	-7.09731	0.370895	0.244283
Q9V3C0	Q9V3C0	abs	FALSE	0	1.50421	0.909921	2.0985	26.9885	6.40745	0.00112696	0.0203434	-0.446799	0.00791298	0.23476
Q9V3D6	Q9V3D6	Cpsf100	TRUE	2	0.990685	-0.515101	2.49647	22.5147	1.66551	0.153687	0.300115	-5.78851	0.116736	0.594824
Q9V3E7	Q9V3E7	Ref1	FALSE	0	2.88238	2.26502	3.49975	28.0966	11.8191	5.41351e-05	0.00393649	2.77991	0.00153118	0.243875
Q9V3F2	Q9V3F2	lace	TRUE	3	0.650389	-0.363433	1.66421	21.5776	1.624	0.162308	0.309027	-5.84165	0.120202	0.400486
Q9V3F3	Q9V3F3	mTTF	FALSE	0	0.842267	0.137326	1.54721	23.8533	3.02463	0.0273701	0.109104	-3.98392	0.042438	0.27847
Q9V3G1	Q9V3G1	RpL8	FALSE	0	0.660204	-0.194827	1.51524	25.2344	1.95466	0.105079	0.23898	-5.4091	0.0929562	0.337759
Q9V3G3	Q9V3G3	cyp33	TRUE	3	0.498889	-0.330933	1.32871	21.8915	1.52193	0.185565	0.334804	-5.97035	0.130229	0.327801
Q9V3H9	Q9V3H9	Nab2	FALSE	0	0.508906	-0.170866	1.18868	24.5743	1.89517	0.113611	0.249083	-5.48819	0.0968857	0.268527
Q9V3J4	Q9V3J4	Sec13	FALSE	0	-0.396868	-1.00663	0.212893	25.0982	-1.64764	0.157343	0.303567	-5.81144	0.118078	0.240871
Q9V3L6	Q9V3L6	Cbp20	FALSE	0	2.2208	1.15979	3.28181	22.7384	5.29864	0.00272883	0.03408	-1.42842	0.0132561	0.419126
Q9V3P2	Q9V3P2	l(2)34Fd	FALSE	0	-0.541159	-1.13619	0.0538706	26.2581	-2.3023	0.0668981	0.183407	-4.94208	0.0713399	0.235052
Q9V3P3	Q9V3P3	REG	FALSE	0	3.18894	2.43777	3.9401	24.0476	10.747	8.78252e-05	0.00529513	2.28968	0.00205965	0.296729
Q9V3P6	Q9V3P6	Rpn2	TRUE	2	-0.316626	-1.57718	0.94393	22.0038	-0.635857	0.551459	0.681435	-6.8732	0.265058	0.497952
Q9V3Q4	Q9V3Q4	Jafrac2	FALSE	0	-0.329982	-1.66031	1.00035	23.4385	-0.627924	0.556261	0.683788	-6.8787	0.265973	0.525514
Q9V3T8	Q9V3T8	SC35	TRUE	2	1.4151	-0.463253	3.29345	22.72	1.90715	0.111838	0.246315	-5.4723	0.0958093	0.741996
Q9V3V6	Q9V3V6	Rpt5	TRUE	3	0.0160195	-0.591468	0.623507	21.5544	0.0667553	0.949236	0.967966	-7.10071	0.37651	0.239973
Q9V3V9	Q9V3V9	EndoGI	TRUE	3	-0.0354834	-0.680787	0.609821	21.1922	-0.139199	0.894458	0.931927	-7.09191	0.362492	0.254912
Q9V3W7	Q9V3W7	SF2	FALSE	0	2.0898	1.49141	2.68819	29.1272	8.84087	0.00023446	0.00942398	1.26147	0.00366565	0.236379
Q9V3W9	Q9V3W9	Rad23	TRUE	4	-0.115198	-1.27456	1.04417	21.4837	-0.251535	0.810917	0.880268	-7.06618	0.342398	0.45798
Q9V3Y5	Q9V3Y5	CG4119	FALSE	0	0.891862	0.103053	1.68067	25.3212	2.8622	0.0332481	0.120162	-4.19531	0.0467394	0.3116
Q9V3Z4	Q9V3Z4	Rpn5	FALSE	0	-1.29976	-2.04641	-0.553099	21.3721	-4.40672	0.00616907	0.0515991	-2.33752	0.0200705	0.294949
Q9V405	Q9V405	Rpt3	TRUE	2	1.5445	0.532091	2.55691	22.8393	3.86195	0.0107168	0.0651565	-2.95166	0.0253439	0.399928
Q9V406	Q9V406	crp	FALSE	0	1.01256	0.388122	1.637	24.6872	4.10493	0.00833174	0.0585244	-2.67204	0.0227643	0.24667
Q9V414	Q9V414	Smg5	TRUE	4	0.244829	-0.948612	1.43827	20.8078	0.519323	0.624606	0.744485	-6.94794	0.289582	0.47144
Q9V420	Q9V420	Su(P)	TRUE	1	0.548433	-0.838509	1.93538	22.6689	1.00101	0.360542	0.512984	-6.56158	0.199535	0.547878
Q9V426	Q9V426	vig	TRUE	2	1.54906	0.372362	2.72576	22.7671	3.33256	0.0191409	0.0884885	-3.59243	0.0344194	0.464827
Q9V431	Q9V431	cass	FALSE	0	1.26413	-0.0392907	2.56755	22.5347	2.45517	0.0550513	0.163236	-4.73632	0.063494	0.514883
Q9V455	Q9V455	Kap-alpha3	FALSE	0	0.582893	-0.0465617	1.21235	24.9967	2.34422	0.0633992	0.177565	-4.88559	0.0690675	0.248651
Q9V460	Q9V460	Spt5	FALSE	0	0.405874	-0.444927	1.25668	26.4216	1.20764	0.278574	0.433438	-6.34318	0.168594	0.336088
Q9V463	Q9V463	Nup154	FALSE	0	-0.989059	-1.68634	-0.291776	27.3204	-3.59077	0.0143455	0.0733498	-3.27456	0.0285309	0.275445
Q9V466	Q9V466	Nup107	FALSE	0	-0.931809	-1.93383	0.070209	27.0659	-2.35411	0.0626033	0.176928	-4.87228	0.0688196	0.395823
Q9V468	Q9V468	CG9776	FALSE	0	1.45601	0.601237	2.31079	26.7723	4.31209	0.00676909	0.0529453	-2.4409	0.0205941	0.337658
Q9V474	Q9V474	dbr	FALSE	0	0.0362115	-1.03205	1.10447	23.3071	0.085811	0.934782	0.962041	-7.09899	0.374205	0.421991
Q9V492	Q9V492	CG11077	TRUE	1	-0.333609	-1.0018	0.334583	22.284	-1.2639	0.259291	0.415037	-6.27961	0.161437	0.263953
Q9V4C8	Q9V4C8	Hcf	FALSE	0	0.0514137	-0.606333	0.70916	26.3665	0.197877	0.850549	0.90412	-7.08029	0.351676	0.259827
Q9V4D4	Q9V4D4	bip2	FALSE	0	-0.517468	-1.17245	0.137512	24.0249	-2	0.0990193	0.232157	-5.34857	0.0903023	0.258734
Q9V4P1	Q9V4P1	scra	TRUE	1	-1.03185	-1.95665	-0.107049	22.4931	-2.82451	0.0348034	0.123736	-4.24479	0.0481296	0.36532
Q9V4Q8	Q9V4Q8	U2A	FALSE	0	4.26949	3.5533	4.98567	24.7133	15.0913	1.54206e-05	0.00202852	3.98569	0.000789032	0.282911
Q9V4W1	Q9V4W1	Gle1	FALSE	0	-1.04206	-2.028	-0.0561176	22.8248	-2.67557	0.0417782	0.139938	-4.44169	0.0544316	0.389472
Q9V535	Q9V535	tsu	TRUE	2	1.26061	-0.353846	2.87507	22.4074	1.97665	0.102094	0.235614	-5.37977	0.0916467	0.637752
Q9V597	Q9V597	RpL31	FALSE	0	1.07871	-0.186417	2.34384	24.5089	2.15847	0.0805429	0.203751	-5.13586	0.0792531	0.499758
Q9V5P6	Q9V5P6	CG7637	TRUE	2	4.22003	3.53732	4.90273	23.5468	15.648	1.27867e-05	0.00185023	4.15584	0.000719684	0.269685
Q9V6Q2	Q9V6Q2	cid	FALSE	0	3.82787	3.22699	4.42875	22.7445	16.1267	1.09397e-05	0.00185023	4.2954	0.000719684	0.237362
Q9V6Y3	Q9V6Y3	mRpS16	TRUE	4	-0.301984	-0.948396	0.344428	21.0651	-1.18263	0.28755	0.441496	-6.37093	0.171729	0.255349
Q9V726	Q9V726	Cpsf160	FALSE	0	-0.341081	-1.01187	0.329704	23.1339	-1.28721	0.251657	0.408695	-6.25281	0.15897	0.264977
Q9V773	Q9V773	Cyp6a20	FALSE	0	-1.35749	-2.0465	-0.668479	21.8644	-4.98753	0.00358502	0.0378651	-1.7325	0.0147284	0.272177
Q9V784	Q9V784	CG7639	TRUE	1	-0.339574	-1.13999	0.460837	21.6334	-1.07398	0.329527	0.483695	-6.4874	0.188143	0.316183
Q9V7P1	Q9V7P1	wcd	FALSE	0	0.0626381	-0.578021	0.703297	24.5452	0.247506	0.813873	0.881096	-7.06735	0.34272	0.253077
Q9V7Y2	Q9V7Y2	Sply	FALSE	0	-0.644104	-1.25605	-0.0321629	24.5716	-2.66453	0.0423528	0.140802	-4.45636	0.0547676	0.241732
Q9V8K2	Q9V8K2	Sec6	TRUE	3	-0.400707	-1.51933	0.717914	21.5275	-0.906814	0.404061	0.555047	-6.65201	0.215897	0.441884
Q9V8R9	Q9V8R9	cora	FALSE	0	0.237756	-0.36512	0.840632	26.1543	0.99834	0.361723	0.513587	-6.56423	0.19977	0.238151
Q9V9K7	Q9V9K7	Ars2	FALSE	0	0.851293	0.111802	1.59078	26.9195	2.91421	0.0312267	0.117977	-4.12729	0.0458894	0.292118
Q9V9M7	Q9V9M7	RpL21	FALSE	0	0.719428	-0.755127	2.19398	26.4416	1.2351	0.269008	0.425415	-6.31235	0.165474	0.582487
Q9V9N4	Q9V9N4	Clamp	TRUE	4	0.6034	-0.128587	1.33539	21.5985	2.08678	0.0884107	0.215371	-5.23226	0.0837728	0.289154
Q9V9T4	Q9V9T4	Acf	FALSE	0	-1.01234	-1.63419	-0.390481	24.848	-4.12107	0.00819613	0.0580688	-2.65379	0.022587	0.245649
Q9V9T5	Q9V9T5	Mccc1	FALSE	0	-4.0934	-4.74425	-3.44255	25.0402	-15.9214	1.16903e-05	0.00185023	4.23628	0.000719684	0.257101
Q9V9U9	Q9V9U9	CG11563	FALSE	0	2.29084	1.67932	2.90236	23.945	9.48335	0.00016509	0.00900364	1.6333	0.00350215	0.241565
Q9V9W2	Q9V9W2	RpL6	FALSE	0	-0.37531	-1.02389	0.27327	27.6804	-1.46488	0.19993	0.350241	-6.0409	0.136233	0.256206
Q9V9Z8	Q9V9Z8	CG15561	TRUE	4	-0.540756	-1.15257	0.0710535	21.4899	-2.23748	0.0727164	0.192712	-5.02943	0.0749592	0.24168
Q9V9Z9	Q9V9Z9	CG1542	FALSE	0	4.50858	3.80257	5.21458	25.4784	16.1662	1.08021e-05	0.00185023	4.30663	0.000719684	0.278889
Q9VA18	Q9VA18	Chchd3	TRUE	3	1.80994	0.751121	2.86875	22.2319	4.32731	0.00666822	0.0525181	-2.42418	0.020428	0.418259
Q9VA69	Q9VA69	PH4alphaEFB	TRUE	4	-0.214775	-0.942178	0.512629	21.3467	-0.74745	0.486786	0.631756	-6.78966	0.245734	0.287343
Q9VAA9	Q9VAA9	Jasper	FALSE	0	0.152934	-0.453749	0.759618	26.1738	0.638142	0.55008	0.680381	-6.8716	0.264648	0.239656
Q9VAC1	Q9VAC1	CG7920	FALSE	0	-0.178775	-0.866333	0.508783	25.4443	-0.658223	0.538063	0.670609	-6.85736	0.260847	0.271603
Q9VAC4	Q9VAC4	Nph	TRUE	1	2.14881	1.54607	2.75155	23.2431	9.02495	0.000211557	0.00900364	1.37089	0.00350215	0.238097
Q9VAH9	Q9VAH9	IntS11	FALSE	0	-1.17624	-1.84107	-0.511413	23.5728	-4.4788	0.00575289	0.0494569	-2.2597	0.0192373	0.262625
Q9VAJ1	Q9VAJ1	Cap-D2	FALSE	0	-0.157851	-0.756721	0.441019	23.7534	-0.667251	0.532717	0.667395	-6.85084	0.259597	0.236569
Q9VAJ2	Q9VAJ2	Bub3	TRUE	1	0.654922	0.00821141	1.30163	22.4189	2.56362	0.0480243	0.148803	-4.59094	0.0578801	0.255467
Q9VAM6	Q9VAM6	Cisd2	TRUE	3	0.446832	-0.422958	1.31662	21.7677	1.30048	0.247402	0.404917	-6.23744	0.157501	0.343589
Q9VAN7	Q9VAN7	Pglym78	TRUE	1	0.459181	-0.28427	1.20263	22.0916	1.56353	0.17572	0.325777	-5.91825	0.126718	0.293682
Q9VAQ5	Q9VAQ5	CG11837	FALSE	0	-0.891718	-1.5144	-0.269031	23.439	-3.62521	0.0138153	0.0724887	-3.23293	0.028196	0.245977
Q9VAQ7	Q9VAQ7	Slu7	FALSE	0	-0.129723	-0.974126	0.714681	22.273	-0.388903	0.712568	0.809233	-7.01523	0.314768	0.333561
Q9VAW1	Q9VAW1	Moca-cyp	FALSE	0	0.0689141	-0.636881	0.774709	26.3062	0.247175	0.814116	0.881096	-7.06745	0.34272	0.278807
Q9VAW3	Q9VAW3	Gfat2	FALSE	0	-0.757648	-1.76306	0.247766	21.0825	-1.90764	0.111765	0.246315	-5.47165	0.0958093	0.397164
Q9VAW5	Q9VAW5	larp	FALSE	0	1.13051	0.461637	1.79939	24.376	4.27863	0.00699706	0.053855	-2.47778	0.020948	0.264223
Q9VAX8	Q9VAX8	CG4849	FALSE	0	0.644737	-0.23186	1.52133	28.0546	1.8619	0.118688	0.255187	-5.53224	0.0992602	0.346278
Q9VAY2	Q9VAY2	Gp93	FALSE	0	-0.180487	-1.27118	0.910206	23.2998	-0.418907	0.691814	0.794106	-7.00134	0.308883	0.430852
Q9VAY6	Q9VAY6	BCAS2	FALSE	0	1.79863	1.16033	2.43694	24.5289	7.13329	0.000673453	0.0148782	0.119745	0.00578719	0.252146
Q9VB04	Q9VB04	btz	TRUE	3	0.0364268	-1.23132	1.30417	21.8909	0.0727383	0.944695	0.967427	-7.10022	0.3763	0.500792
Q9VB05	Q9VB05	ALiX	TRUE	2	-1.05935	-1.92988	-0.18883	21.6858	-3.0806	0.0256193	0.105316	-3.91182	0.0409648	0.343879
Q9VB46	Q9VB46	Hmu	FALSE	0	-0.264006	-0.882946	0.354934	23.8751	-1.07979	0.327156	0.481582	-6.48134	0.187321	0.244497
Q9VB49	Q9VB49	mrt	FALSE	0	0.297995	-0.300427	0.896417	23.3389	1.2606	0.260387	0.415872	-6.28338	0.161762	0.236392
Q9VB52	Q9VB52	l(3)mbt	FALSE	0	-0.334506	-0.983451	0.314439	23.755	-1.30488	0.246007	0.40314	-6.23233	0.156809	0.25635
Q9VB74	Q9VB74	CG6066	FALSE	0	0.358789	-0.458089	1.17567	23.6863	1.11188	0.314324	0.468411	-6.44755	0.182198	0.322688
Q9VBB3	Q9VBB3	IntS12	FALSE	0	-0.080204	-0.954951	0.794543	22.1888	-0.232107	0.825201	0.890627	-7.07167	0.346427	0.345547
Q9VBI4	Q9VBI4	Exo84	FALSE	0	-0.419479	-1.07736	0.2384	23.5848	-1.61413	0.164427	0.312239	-5.85422	0.121452	0.259879
Q9VBK9	Q9VBK9	CG5913	FALSE	0	1.19091	0.366227	2.0156	25.2647	3.65566	0.0133647	0.0716249	-3.19626	0.02786	0.325772
Q9VBN5	Q9VBN5	RpL27	FALSE	0	0.788831	0.0230709	1.55459	25.3012	2.60775	0.0454486	0.14422	-4.532	0.0560971	0.302495
Q9VBP5	Q9VBP5	jigr1	TRUE	1	0.217107	-0.486592	0.920807	23.4842	0.781019	0.468409	0.617855	-6.76238	0.240327	0.277979
Q9VBU6	Q9VBU6	CG11857	FALSE	0	-0.275798	-1.08035	0.52875	24.1413	-0.867787	0.423259	0.574536	-6.68758	0.223477	0.317817
Q9VBU8	Q9VBU8	Nup37	TRUE	1	-0.735877	-1.6421	0.170347	22.8919	-2.05563	0.0920763	0.221688	-5.27408	0.08623	0.357982
Q9VBU9	Q9VBU9	RpS27	FALSE	0	0.0257939	-0.596741	0.648328	24.8471	0.104889	0.92034	0.95353	-7.09685	0.370895	0.245917
Q9VBX1	Q9VBX1	Clbn	TRUE	1	0.405959	-0.468942	1.28086	22.5278	1.17462	0.290478	0.444784	-6.37974	0.173008	0.345608
Q9VBX3	Q9VBX3	vig2	TRUE	2	0.220642	-0.524269	0.965552	21.8414	0.749822	0.485471	0.63151	-6.78776	0.245638	0.294259
Q9VBX4	Q9VBX4	CG31510	FALSE	0	0.417771	-0.246427	1.08197	24.0299	1.59226	0.169218	0.316526	-5.88198	0.123119	0.262375
Q9VBY2	Q9VBY2	CG11920	FALSE	0	1.16512	0.27383	2.05642	24.935	3.30922	0.0196565	0.0895939	-3.62164	0.0348494	0.352083
Q9VBY6	Q9VBY6	PQBP1	TRUE	3	2.0498	1.19219	2.90741	22.4451	6.05057	0.00147733	0.0245712	-0.746388	0.00955746	0.338778
Q9VBZ5	Q9VBZ5	Ythdf	TRUE	2	0.712162	-0.062854	1.48718	22.3714	2.32618	0.0648807	0.179507	-4.9099	0.069823	0.306151
Q9VC08	Q9VC08	Mink	FALSE	0	0.138233	-0.496307	0.772773	24.9695	0.551477	0.603877	0.727313	-6.92865	0.282903	0.250659
Q9VC28	Q9VC28	CG7006	FALSE	0	1.20919	0.143747	2.27463	25.8406	2.87302	0.032816	0.119512	-4.18113	0.0464867	0.420877
Q9VC36	Q9VC36	polybromo	FALSE	0	-0.747747	-1.39166	-0.103833	24.2575	-2.93969	0.0302861	0.116244	-4.09408	0.0452155	0.254362
Q9VC45	Q9VC45	asp	TRUE	3	-0.862152	-1.84967	0.125366	21.0186	-2.21011	0.0753329	0.194769	-5.06631	0.0757593	0.390095
Q9VC49	Q9VC49	Rpb10	TRUE	3	2.05064	1.10845	2.99283	22.2077	5.50968	0.00228264	0.0312869	-1.22966	0.0121697	0.372189
Q9VC54	Q9VC54	CG6695	FALSE	0	0.847171	0.237305	1.45704	24.0408	3.51651	0.0155694	0.0776861	-3.36497	0.0302176	0.240913
Q9VC60	Q9VC60	CG13625	TRUE	2	1.1413	0.212003	2.07059	22.3438	3.109	0.024779	0.104534	-3.8754	0.0406607	0.367095
Q9VC93	Q9VC93	Dis3	FALSE	0	0.0379804	-0.653492	0.729453	24.1151	0.139046	0.894572	0.931927	-7.09194	0.362492	0.273149
Q9VC94	Q9VC94	CG5728	FALSE	0	-0.076247	-0.814641	0.662147	28.9379	-0.261402	0.803693	0.877805	-7.06322	0.34144	0.291685
Q9VC96	Q9VC96	BRWD3	FALSE	0	1.91476	1.15661	2.67292	24.5674	6.39339	0.00113878	0.0203434	-0.458325	0.00791298	0.299491
Q9VCD8	Q9VCD8	SMC1	FALSE	0	-0.453753	-1.07322	0.165718	25.676	-1.85427	0.119885	0.256618	-5.54232	0.0998166	0.244707
Q9VCF8	Q9VCF8	CG5854	TRUE	4	-0.673694	-1.49436	0.14697	21.3242	-2.07813	0.0894133	0.216719	-5.24388	0.0842971	0.324183
Q9VCG4	Q9VCG4	Ndc1	FALSE	0	-1.19841	-1.82988	-0.566926	23.4861	-4.80418	0.00423448	0.0416379	-1.91812	0.0161959	0.24945
Q9VCH5	Q9VCH5	Nup98-96	FALSE	0	-0.26877	-0.925878	0.388338	27.8452	-1.03542	0.345626	0.498129	-6.52702	0.193757	0.259575
Q9VCK0	Q9VCK0	eIF3d1	FALSE	0	1.31397	0.620338	2.0076	24.9194	4.79547	0.00426859	0.0416379	-1.92706	0.0161959	0.274002
Q9VCK6	Q9VCK6	CG10184	TRUE	1	-0.0456089	-1.48285	1.39163	22.5036	-0.0803332	0.938934	0.963844	-7.09953	0.374907	0.567747
Q9VCP0	Q9VCP0	EloA	TRUE	4	-0.197125	-1.04775	0.653503	21.3251	-0.586646	0.581674	0.706703	-6.90637	0.274886	0.33602
Q9VCU6	Q9VCU6	HP1c	TRUE	3	1.70599	1.05491	2.35707	21.9349	6.63311	0.000955556	0.0181933	-0.264739	0.00707665	0.257193
Q9VCW3	Q9VCW3	Nup133	FALSE	0	-0.518532	-1.26626	0.229201	27.0566	-1.75551	0.13652	0.278233	-5.67196	0.108224	0.295374
Q9VCX7	Q9VCX7	CG31156	FALSE	0	0.097502	-0.533618	0.728622	23.2295	0.39109	0.711046	0.808474	-7.01425	0.314472	0.249308
Q9VCY1	Q9VCY1	CG6937	FALSE	0	0.358408	-0.639927	1.35674	27.1906	0.908817	0.403094	0.554576	-6.65016	0.215713	0.394368
Q9VD07	Q9VD07	CG12499	FALSE	0	-0.751491	-1.43871	-0.0642747	26.7328	-2.76825	0.0372755	0.129658	-4.31892	0.0504331	0.271468
Q9VD26	Q9VD26	CG5382	TRUE	1	0.919455	0.109299	1.72961	22.857	2.87301	0.0328167	0.119512	-4.18115	0.0464867	0.320032
Q9VD52	Q9VD52	CG6015	FALSE	0	1.65731	1.06533	2.2493	24.7659	7.0871	0.000694961	0.0148782	0.0852962	0.00578719	0.233849
Q9VD81	Q9VD81	RpI12	FALSE	0	0.0880137	-0.511776	0.687803	22.8722	0.371472	0.724756	0.816762	-7.02285	0.317696	0.236932
Q9VDE5	Q9VDE5	ppan	FALSE	0	0.742699	0.102305	1.38309	26.8587	2.93589	0.0304242	0.116334	-4.09902	0.0452504	0.252972
Q9VDI3	Q9VDI3	CG17272	TRUE	4	0.222823	-1.07636	1.52201	21.5721	0.434173	0.681367	0.790015	-6.9939	0.307292	0.513212
Q9VDL2	Q9VDL2	TFAM	FALSE	0	1.39752	0.183688	2.61135	22.3849	2.91457	0.0312132	0.117977	-4.12682	0.0458894	0.479494
Q9VDN4	Q9VDN4	CG4360	TRUE	1	0.234886	-1.13984	1.60962	21.796	0.432528	0.682489	0.790184	-6.99472	0.307358	0.543054
Q9VDQ3	Q9VDQ3	CG4936	FALSE	0	0.287671	-0.765155	1.3405	22.8112	0.691695	0.518418	0.655154	-6.8328	0.254835	0.415893
Q9VDS6	Q9VDS6	Surf6	FALSE	0	0.928972	0.0273897	1.83055	26.5173	2.60839	0.0454126	0.14422	-4.53115	0.0560971	0.356148
Q9VDT1	Q9VDT1	Arc42	TRUE	1	-1.3503	-2.08767	-0.612941	22.13	-4.6358	0.0049533	0.045945	-2.09291	0.0178712	0.291278
Q9VDV3	Q9VDV3	Nup58	TRUE	2	-0.0711838	-0.856868	0.7145	21.9864	-0.229355	0.827231	0.890627	-7.07241	0.346427	0.310365
Q9VDY1	Q9VDY1	Ino80	FALSE	0	-0.868499	-1.46351	-0.273484	24.5267	-3.69502	0.0128069	0.070935	-3.14909	0.0275916	0.235046
Q9VDZ4	Q9VDZ4	Nsun5	FALSE	0	-0.451965	-1.20095	0.297021	22.3046	-1.52759	0.184195	0.333863	-5.9633	0.129863	0.295868
Q9VE17	Q9VE17	snRNP-U1-C	TRUE	3	2.03285	0.768529	3.29716	22.906	4.07027	0.00863169	0.0591946	-2.71136	0.0230249	0.499438
Q9VE18	Q9VE18	Smu1	FALSE	0	-0.569991	-1.36246	0.222479	22.2905	-1.82079	0.125282	0.263577	-5.58645	0.102524	0.313046
Q9VE51	Q9VE51	Cpsf73	TRUE	1	0.0811686	-1.30101	1.46334	21.8828	0.148662	0.887343	0.928486	-7.09031	0.361153	0.545995
Q9VE52	Q9VE52	CstF64	FALSE	0	2.34798	1.58381	3.11216	23.2662	7.77816	0.00044167	0.0127819	0.579845	0.0049718	0.301868
Q9VE85	Q9VE85	Nup43	FALSE	0	-0.0789098	-0.702627	0.544808	25.9314	-0.320271	0.761075	0.842084	-7.04331	0.327546	0.246384
Q9VE94	Q9VE94	CG18600	FALSE	0	0.104847	-0.520207	0.729902	25.225	0.424634	0.687885	0.790984	-6.99858	0.307669	0.246912
Q9VE98	Q9VE98	CG8064	FALSE	0	-0.700393	-1.45923	0.0584405	25.5334	-2.33652	0.064027	0.178167	-4.89596	0.0693018	0.299759
Q9VEA5	Q9VEA5	Rpb4	TRUE	1	1.4108	0.735649	2.08595	22.9024	5.28981	0.0027496	0.03408	-1.43686	0.0132561	0.266701
Q9VEB3	Q9VEB3	Non3	FALSE	0	-0.359511	-1.5705	0.851474	27.3675	-0.751534	0.484524	0.63151	-6.78639	0.245638	0.47837
Q9VEC1	Q9VEC1	MED17	TRUE	2	0.056495	-0.931691	1.04468	22.0369	0.144726	0.890301	0.930155	-7.09099	0.361803	0.390359
Q9VEF0	Q9VEF0	Odj	TRUE	3	1.50835	0.732732	2.28396	22.6693	4.923	0.00379949	0.0384449	-1.79727	0.0149539	0.306387
Q9VEF5	Q9VEF5	CG7379	TRUE	4	0.4449	-1.21368	2.10348	21.6963	0.67905	0.525783	0.660997	-6.8422	0.257108	0.65518
Q9VEG9	Q9VEG9	CG7655	TRUE	2	-0.507576	-1.57123	0.556078	21.3165	-1.20802	0.278439	0.433438	-6.34276	0.168594	0.42017
Q9VEH0	Q9VEH0	alt	FALSE	0	-0.013288	-0.935669	0.909093	26.4359	-0.0364689	0.97225	0.981748	-7.10255	0.381871	0.364364
Q9VEJ0	Q9VEJ0	Prx3	FALSE	0	0.993904	0.283059	1.70475	22.2395	3.53952	0.015178	0.0767921	-3.33686	0.0298699	0.280802
Q9VEJ1	Q9VEJ1	SF1	FALSE	0	1.11168	0.49161	1.73176	24.5373	4.53851	0.00543245	0.0485039	-2.19583	0.0188666	0.244945
Q9VEL2	Q9VEL2	Brf	FALSE	0	2.98724	2.36357	3.6109	23.8974	12.1252	4.7506e-05	0.00393649	2.91006	0.00153118	0.246366
Q9VEN1	Q9VEN1	cher	FALSE	0	-0.369137	-1.08969	0.351417	22.5272	-1.29687	0.248554	0.40502	-6.24163	0.157541	0.284637
Q9VEN2	Q9VEN2	cal1	TRUE	4	-0.947395	-1.54465	-0.350141	21.2579	-4.01557	0.00913054	0.0609958	-2.7738	0.0237256	0.235931
Q9VEP0	Q9VEP0	CG3995	FALSE	0	0.284438	-0.446395	1.01527	25.9137	0.985245	0.367551	0.519889	-6.57715	0.202221	0.288698
Q9VEP9	Q9VEP9	Sf3a1	FALSE	0	1.37964	0.671132	2.08815	24.2087	4.92941	0.00377753	0.0384449	-1.79081	0.0149539	0.27988
Q9VEQ2	Q9VEQ2	EMC2B	TRUE	2	-0.615178	-1.48743	0.257074	21.396	-1.78539	0.131256	0.271324	-5.63291	0.105537	0.344562
Q9VES0	Q9VES0	CG10324	TRUE	2	0.0291536	-0.740894	0.799201	22.6033	0.0958407	0.927186	0.956606	-7.09792	0.372091	0.304188
Q9VEX5	Q9VEX5	asun	FALSE	0	-0.16773	-0.773029	0.437569	22.9865	-0.701481	0.512767	0.652993	-6.82543	0.253995	0.239108
Q9VEX6	Q9VEX6	bor	FALSE	0	-0.200867	-0.948751	0.547017	26.8186	-0.679907	0.525281	0.66094	-6.84156	0.257086	0.295433
Q9VEY5	Q9VEY5	CG5903	TRUE	3	1.14321	0.475191	1.81122	22.0449	4.33224	0.00663588	0.0525181	-2.41877	0.020428	0.263883
Q9VEZ3	Q9VEZ3	msps	FALSE	0	-0.209539	-1.09748	0.678398	25.953	-0.59739	0.574992	0.700938	-6.89933	0.272644	0.350758
Q9VEZ8	Q9VEZ8	pnr	FALSE	0	0.838288	0.20961	1.46697	24.2819	3.37551	0.018231	0.0859294	-3.53887	0.033424	0.248344
Q9VF04	Q9VF04	Rbf2	TRUE	3	-0.802238	-1.96466	0.360186	21.0771	-1.74708	0.138044	0.280513	-5.68295	0.109111	0.459187
Q9VF77	Q9VF77	Trax	TRUE	4	-1.89731	-2.57193	-1.2227	21.3629	-7.11961	0.000679739	0.0148782	0.109566	0.00578719	0.266491
Q9VF87	Q9VF87	Sra-1	FALSE	0	-1.13119	-1.86285	-0.399536	22.9389	-3.91385	0.0101481	0.0635687	-2.89115	0.0247263	0.289022
Q9VFB5	Q9VFB5	Rpb7	FALSE	0	-0.514606	-1.20482	0.175612	22.5233	-1.8874	0.114777	0.250502	-5.4985	0.0974376	0.272654
Q9VFB9	Q9VFB9	CG6654	TRUE	4	-0.707674	-1.53829	0.122948	21.1825	-2.15677	0.08072	0.203843	-5.13814	0.0792887	0.328117
Q9VFC0	Q9VFC0	Mau2	TRUE	2	0.740926	-1.25741	2.73926	22.7426	0.9386	0.388933	0.542482	-6.6222	0.21101	0.789395
Q9VFE6	Q9VFE6	CG3817	FALSE	0	5.25487	4.5283	5.98144	23.9979	18.3089	5.66186e-06	0.00185023	4.86144	0.000719684	0.287013
Q9VFE7	Q9VFE7	Nup93-2	FALSE	0	-0.977945	-1.61563	-0.340256	25.8814	-3.88222	0.0104905	0.0644845	-2.92797	0.0250826	0.251903
Q9VFF3	Q9VFF3	Rrp6	FALSE	0	-0.510672	-1.11903	0.0976866	24.703	-2.12499	0.0841215	0.210129	-5.18091	0.0817338	0.240317
Q9VFP0	Q9VFP0	CG3061	TRUE	3	-0.674671	-1.49175	0.142406	21.183	-2.09028	0.0880088	0.214753	-5.22757	0.0835326	0.322767
Q9VFS6	Q9VFS6	omd	FALSE	0	-0.929712	-1.53001	-0.329418	22.9437	-3.92066	0.0100762	0.0635407	-2.88325	0.0247154	0.237132
Q9VFT4	Q9VFT4	rin	FALSE	0	1.75468	0.968938	2.54042	27.0967	5.65319	0.00202753	0.0293384	-1.09785	0.0114118	0.310387
Q9VFV8	Q9VFV8	CG9799	FALSE	0	-0.66189	-1.30428	-0.0195033	25.7217	-2.60834	0.0454153	0.14422	-4.53121	0.0560971	0.253759
Q9VFV9	Q9VFV9	Droj2	FALSE	0	0.255955	-0.359669	0.871579	26.4516	1.0525	0.338416	0.492148	-6.50959	0.191431	0.243187
Q9VG33	Q9VG33	CG12279	TRUE	3	0.971668	0.039698	1.90364	21.9935	2.63931	0.0436985	0.142397	-4.48993	0.0553882	0.368152
Q9VG73	Q9VG73	CG5641	TRUE	2	-1.32916	-2.11912	-0.539193	22.1333	-4.25936	0.0071324	0.0544167	-2.49911	0.0211665	0.312056
Q9VG78	Q9VG78	pps	FALSE	0	-0.375738	-0.967696	0.216219	25.9172	-1.60683	0.166012	0.314012	-5.8635	0.122141	0.233838
Q9VG81	Q9VG81	Sccpdh2	TRUE	2	-0.1332	-0.855186	0.588786	22.2595	-0.467036	0.65915	0.774181	-6.97706	0.301133	0.285203
Q9VG84	Q9VG84	DNAlig3	FALSE	0	-0.827189	-1.43781	-0.216566	24.1328	-3.42931	0.0171593	0.0824901	-3.47217	0.0320862	0.241212
Q9VGA4	Q9VGA4	MBD-R2	FALSE	0	-0.123712	-0.848226	0.600803	26.3081	-0.432253	0.682676	0.790184	-6.99485	0.307358	0.286202
Q9VGG9	Q9VGG9	CG31368	FALSE	0	-0.0815518	-0.973773	0.81067	24.6126	-0.231385	0.825733	0.890627	-7.07186	0.346427	0.35245
Q9VGH0	Q9VGH0	CG6962	FALSE	0	-0.899648	-1.51644	-0.282853	23.886	-3.69238	0.0128434	0.070935	-3.15224	0.0275916	0.24365
Q9VGH5	Q9VGH5	glo	FALSE	0	4.16645	3.27361	5.05929	25.0783	11.8132	5.42739e-05	0.00393649	2.77735	0.00153118	0.352695
Q9VGI8	Q9VGI8	Blm	FALSE	0	0.520419	-0.150947	1.19178	22.9339	1.96231	0.104029	0.237805	-5.3989	0.0924991	0.265207
Q9VGL0	Q9VGL0	CG14712	FALSE	0	-0.515519	-1.13954	0.108502	24.7494	-2.09132	0.0878895	0.214753	-5.22617	0.0835326	0.246504
Q9VGL2	Q9VGL2	CG14711	FALSE	0	1.49804	0.14199	2.8541	21.1607	2.79655	0.0360087	0.126468	-4.28159	0.0491921	0.535676
Q9VGN9	Q9VGN9	RpL24-like	FALSE	0	2.20134	1.60159	2.80108	25.5492	9.29173	0.000182878	0.00900364	1.52531	0.00350215	0.236914
Q9VGQ1	Q9VGQ1	CG5214	FALSE	0	0.0703494	-0.801741	0.94244	22.3742	0.204209	0.845844	0.903533	-7.0788	0.351447	0.344498
Q9VGT3	Q9VGT3	Ugt302C1	TRUE	1	-0.389552	-1.33474	0.555633	20.8646	-1.04333	0.342271	0.495266	-6.51897	0.192644	0.373372
Q9VGZ2	Q9VGZ2	Rrp46	TRUE	4	-0.66906	-1.54878	0.210656	21.3817	-1.92529	0.109205	0.243291	-5.4482	0.094633	0.34751
Q9VH00	Q9VH00	CG12818	TRUE	4	-0.483001	-1.33872	0.37272	21.0238	-1.42886	0.209536	0.360761	-6.08486	0.140325	0.338032
Q9VH07	Q9VH07	pont	FALSE	0	0.28955	-0.682724	1.26182	26.3376	0.753893	0.48322	0.63151	-6.7845	0.245638	0.384073
Q9VH64	Q9VH64	CG8507	FALSE	0	1.29792	0.701048	1.89478	23.9883	5.50481	0.00229193	0.0312869	-1.23418	0.0121697	0.235778
Q9VH84	Q9VH84	Pnn	FALSE	0	1.3079	0.697209	1.9186	25.0764	5.42158	0.00245773	0.0329291	-1.31191	0.0128084	0.24124
Q9VH89	Q9VH89	dmt	TRUE	4	-1.05395	-2.16486	0.0569535	20.692	-2.4017	0.0589172	0.171617	-4.80821	0.0667538	0.438836
Q9VHC0	Q9VHC0	RnpS1	FALSE	0	-0.0272443	-0.663495	0.609006	24.3047	-0.108398	0.917687	0.952577	-7.0964	0.370524	0.251335
Q9VHC7	Q9VHC7	rump	FALSE	0	0.482013	-0.189501	1.15353	29.6717	1.8171	0.125892	0.264008	-5.5913	0.102691	0.265265
Q9VHE5	Q9VHE5	RpL34b	FALSE	0	-0.36529	-1.09464	0.364057	27.0881	-1.26788	0.257971	0.414548	-6.27505	0.161247	0.28811
Q9VHG6	Q9VHG6	Ibf2	FALSE	0	-0.184679	-0.850904	0.481547	25.1003	-0.701731	0.512623	0.652993	-6.82524	0.253995	0.263176
Q9VHH8	Q9VHH8	beag	FALSE	0	3.1235	2.46309	3.7839	23.9589	11.973	5.06745e-05	0.00393649	2.84585	0.00153118	0.260879
Q9VHI1	Q9VHI1	hyx	FALSE	0	-0.106441	-0.699672	0.486789	24.9715	-0.454215	0.667773	0.78177	-6.98376	0.304085	0.234341
Q9VHL1	Q9VHL1	CG9839	FALSE	0	0.478336	-0.304021	1.26069	23.7631	1.54776	0.179392	0.328998	-5.93807	0.127971	0.309051
Q9VHL2	Q9VHL2	CCT7	FALSE	0	-0.582859	-1.21391	0.048192	23.2633	-2.33816	0.0638931	0.178167	-4.89376	0.0693018	0.249281
Q9VHM3	Q9VHM3	M1BP	FALSE	0	0.35699	-0.242624	0.956604	26.8471	1.50716	0.189186	0.338383	-5.98872	0.131621	0.236863
Q9VHM5	Q9VHM5	CG8159	TRUE	3	2.23065	1.60653	2.85477	22.3606	9.04772	0.000208913	0.00900364	1.38426	0.00350215	0.246543
Q9VHN4	Q9VHN4	CG8043	TRUE	1	0.851853	-0.262052	1.96576	22.8955	1.93594	0.107691	0.24122	-5.43404	0.0938275	0.440021
Q9VHP0	Q9VHP0	bel	FALSE	0	1.20725	0.29178	2.12271	29.271	3.33832	0.0190158	0.0884885	-3.58522	0.0344194	0.361632
Q9VHR5	Q9VHR5	CG9684	FALSE	0	-1.16838	-1.87342	-0.463347	23.2738	-4.19517	0.00760517	0.0561463	-2.57054	0.0218392	0.278507
Q9VHS0	Q9VHS0	CG9601	TRUE	1	0.182497	-1.26656	1.63156	22.9913	0.318819	0.762115	0.84246	-7.04385	0.327692	0.572415
Q9VHS8	Q9VHS8	CG7483	FALSE	0	-0.0126509	-0.719237	0.693936	26.458	-0.0453242	0.965517	0.977526	-7.10213	0.380229	0.27912
Q9VHT2	Q9VHT2	tex	TRUE	1	-0.437907	-1.32654	0.450723	22.6215	-1.24749	0.264788	0.421372	-6.29832	0.163901	0.351032
Q9VHX4	Q9VHX4	CG2767	TRUE	2	-1.55994	-2.17001	-0.949858	22.8632	-6.47286	0.00107382	0.0199208	-0.393454	0.00774859	0.240997
Q9VI10	Q9VI10	SmD2	FALSE	0	-0.731425	-1.45555	-0.00729614	22.8616	-2.55699	0.0484252	0.149406	-4.59982	0.0581143	0.286049
Q9VI18	Q9VI18	CG1024	FALSE	0	-0.70534	-1.29918	-0.111497	24.0248	-3.00678	0.0279561	0.109637	-4.007	0.0426454	0.234583
Q9VI24	Q9VI24	Zif	TRUE	2	-0.205492	-1.06578	0.654799	21.4592	-0.604678	0.570486	0.697207	-6.89449	0.271193	0.339837
Q9VI54	Q9VI54	CG1965	TRUE	4	0.0515985	-0.614442	0.717639	21.3302	0.196115	0.85186	0.90412	-7.0807	0.351676	0.263103
Q9VI82	Q9VI82	CG1234	FALSE	0	0.215365	-0.567776	0.998506	26.1964	0.696161	0.515834	0.654747	-6.82944	0.254677	0.309361
Q9VID9	Q9VID9	CG8677	FALSE	0	0.344779	-0.24798	0.937537	24.5386	1.47244	0.197967	0.348966	-6.03161	0.135737	0.234155
Q9VIE8	Q9VIE8	mAcon1	FALSE	0	-0.182426	-0.958205	0.593354	22.6994	-0.595282	0.576299	0.70194	-6.90072	0.273034	0.306453
Q9VIF0	Q9VIF0	CG9246	FALSE	0	-0.075574	-1.03653	0.885382	26.4849	-0.199087	0.849649	0.90412	-7.08001	0.351676	0.379602
Q9VIF6	Q9VIF6	CG9253	FALSE	0	-0.422052	-1.597	0.7529	25.4255	-0.909328	0.402848	0.554576	-6.64968	0.215713	0.464136
Q9VIG1	Q9VIG1	l(2)05287	FALSE	0	-0.714517	-1.3841	-0.0449375	26.6296	-2.70138	0.0404674	0.136495	-4.40743	0.0530925	0.264501
Q9VIH1	Q9VIH1	RPA2	FALSE	0	1.7213	1.11995	2.32264	23.1303	7.24614	0.000624103	0.0148782	0.203052	0.00578719	0.237547
Q9VIM6	Q9VIM6	CG10949	TRUE	4	-0.306764	-0.982706	0.369178	21.2863	-1.14887	0.300069	0.452763	-6.40785	0.176112	0.267015
Q9VIP9	Q9VIP9	barr	FALSE	0	-0.421259	-1.21109	0.368567	23.3698	-1.35018	0.232049	0.385336	-6.17918	0.149884	0.312002
Q9VIS0	Q9VIS0	CG10466	TRUE	3	-0.0734004	-1.05338	0.906578	21.6688	-0.189608	0.856705	0.906992	-7.08217	0.352793	0.387116
Q9VIT3	Q9VIT3	msb1l	TRUE	2	-0.221757	-0.837757	0.394243	21.5093	-0.911319	0.401889	0.554576	-6.64783	0.215713	0.243336
Q9VIV2	Q9VIV2	swm	FALSE	0	0.238189	-0.408154	0.884532	23.0548	0.932897	0.391614	0.545394	-6.62761	0.212142	0.255322
Q9VIW3	Q9VIW3	RanGAP	FALSE	0	0.825555	0.186135	1.46497	27.6353	3.26839	0.0205965	0.0919849	-3.67293	0.0357794	0.252587
Q9VIW7	Q9VIW7	RtcB	FALSE	0	0.0346479	-0.594408	0.663704	24.4984	0.139432	0.894282	0.931927	-7.09187	0.362492	0.248493
Q9VIX3	Q9VIX3	Pax	TRUE	2	-0.0770535	-0.786272	0.632165	21.5956	-0.275034	0.793749	0.869459	-7.05896	0.338194	0.28016
Q9VIZ3	Q9VIZ3	l(2)37Cb	FALSE	0	-0.361526	-1.1603	0.437246	23.5038	-1.14575	0.301246	0.45403	-6.41122	0.176604	0.315535
Q9VJ12	Q9VJ12	Acn	FALSE	0	0.315719	-0.295245	0.926683	27.4787	1.30816	0.244972	0.402354	-6.22851	0.156504	0.241346
Q9VJ19	Q9VJ19	RpL30	FALSE	0	0.622135	-0.07715	1.32142	25.0161	2.25219	0.0713506	0.19084	-5.00961	0.074231	0.276236
Q9VJ44	Q9VJ44	CG17597	FALSE	0	-1.15179	-1.97736	-0.326216	22.3238	-3.53177	0.0153085	0.0770438	-3.34632	0.0299677	0.326122
Q9VJ74	Q9VJ74	CG10333	FALSE	0	-0.586604	-1.1869	0.0136917	26.3752	-2.47374	0.0537733	0.160764	-4.71138	0.0625325	0.237132
Q9VJ77	Q9VJ77	CG15160	FALSE	0	-0.272078	-1.24254	0.698387	22.9657	-0.709722	0.50804	0.649412	-6.81915	0.252602	0.383358
Q9VJ86	Q9VJ86	bsf	FALSE	0	-0.644402	-1.23745	-0.051352	22.8162	-2.75068	0.0380864	0.132161	-4.34213	0.0514066	0.23427
Q9VJ87	Q9VJ87	ncm	FALSE	0	0.780633	-0.600076	2.16134	27.4689	1.43126	0.208882	0.360254	-6.08195	0.140128	0.545416
Q9VJD1	Q9VJD1	GCS2beta	FALSE	0	0.243444	-0.645956	1.13284	22.6475	0.69291	0.517714	0.655154	-6.83189	0.254835	0.351336
Q9VJG2	Q9VJG2	CG12288	FALSE	0	0.724383	0.0920858	1.35668	22.1849	2.90016	0.0317592	0.118353	-4.14564	0.0460359	0.249774
Q9VJH2	Q9VJH2	AspRS-m	FALSE	0	-0.254716	-0.905192	0.395759	22.8426	-0.99129	0.364851	0.517081	-6.5712	0.201129	0.256954
Q9VJI6	Q9VJI6	BuGZ	TRUE	2	2.07	1.42246	2.71754	22.8839	8.09239	0.000363505	0.0112515	0.790755	0.00437649	0.255796
Q9VJJ8	Q9VJJ8	mtgo	FALSE	0	-0.764826	-1.47952	-0.0501281	22.3706	-2.70904	0.0400871	0.136485	-4.39727	0.0530885	0.282324
Q9VJQ5	Q9VJQ5	NC2beta	TRUE	3	2.52101	1.73874	3.30327	22.8327	8.15824	0.00034926	0.0112515	0.833914	0.00437649	0.309013
Q9VJY7	Q9VJY7	CG7099	TRUE	4	-0.588635	-1.23982	0.0625535	21.0648	-2.28831	0.0681107	0.185589	-4.96093	0.0721885	0.257236
Q9VJZ1	Q9VJZ1	CG9302	TRUE	2	-0.0983485	-1.05226	0.855567	22.4978	-0.260995	0.803991	0.877805	-7.06335	0.34144	0.376821
Q9VJZ7	Q9VJZ7	Nnp-1	FALSE	0	-0.00833008	-0.721214	0.704554	26.6243	-0.0295805	0.977489	0.985664	-7.10282	0.383394	0.281607
Q9VK18	Q9VK18	CG16812	FALSE	0	0.664563	-0.012232	1.34136	24.6841	2.48573	0.0529654	0.159006	-4.6953	0.0618486	0.267352
Q9VK19	Q9VK19	Ski6	TRUE	1	0.543061	-0.615171	1.70129	22.7515	1.18694	0.285986	0.439794	-6.36617	0.171067	0.457531
Q9VK58	Q9VK58	Pih1D1	FALSE	0	0.593823	-0.0259243	1.21357	24.9442	2.42559	0.0571552	0.167727	-4.77608	0.0652409	0.244816
Q9VK59	Q9VK59	CG5787	FALSE	0	0.478008	-0.191173	1.14719	29.1718	1.80828	0.127361	0.265773	-5.60289	0.103378	0.264344
Q9VK69	Q9VK69	CCT4	FALSE	0	0.111518	-0.527138	0.750174	24.7219	0.442031	0.676021	0.78684	-6.98998	0.306057	0.252285
Q9VKB2	Q9VKB2	Ced-12	TRUE	2	-0.775068	-1.66302	0.112885	21.104	-2.20966	0.075377	0.194769	-5.06692	0.0757593	0.350764
Q9VKB4	Q9VKB4	CG6712	FALSE	0	-0.320341	-1.21283	0.57215	24.9693	-0.908622	0.403188	0.554576	-6.65034	0.215713	0.352557
Q9VKC1	Q9VKC1	RpL7-like	FALSE	0	0.831847	0.234315	1.42938	27.0525	3.52417	0.0154378	0.0772957	-3.35559	0.0300657	0.23604
Q9VKC8	Q9VKC8	Tom70	TRUE	4	-0.669549	-1.31168	-0.027418	21.1377	-2.63957	0.0436844	0.142397	-4.48958	0.0553882	0.253658
Q9VKD3	Q9VKD3	Nfs1	FALSE	0	-0.318043	-1.04066	0.404573	23.5749	-1.11417	0.313422	0.467548	-6.44511	0.181862	0.285452
Q9VKD8	Q9VKD8	CG6686	FALSE	0	1.20444	0.593793	1.81509	25.7487	4.9931	0.00356718	0.0378651	-1.72694	0.0147284	0.241221
Q9VKF4	Q9VKF4	CG14932	TRUE	4	-1.04267	-2.12994	0.0446049	21.4124	-2.42763	0.0570074	0.167727	-4.77334	0.0652409	0.4295
Q9VKG8	Q9VKG8	Dlg5	FALSE	0	-0.609268	-1.23243	0.0138988	25.3	-2.47502	0.0536865	0.160764	-4.70967	0.0625325	0.246167
Q9VKI2	Q9VKI2	CG4788	FALSE	0	-0.885675	-1.50584	-0.26551	23.6269	-3.61528	0.0139658	0.0724887	-3.24491	0.028196	0.244981
Q9VKJ1	Q9VKJ1	CG4751	TRUE	4	-1.47875	-2.35864	-0.598851	21.3026	-4.25439	0.00716773	0.0544167	-2.50461	0.0211665	0.347581
Q9VKJ6	Q9VKJ6	CG6230	FALSE	0	-0.877161	-1.62067	-0.133652	22.8264	-2.98654	0.0286375	0.111095	-4.03321	0.0432127	0.293705
Q9VKK1	Q9VKK1	Ge-1	FALSE	0	-0.572398	-1.22278	0.0779866	21.551	-2.22794	0.073618	0.193053	-5.04229	0.0750919	0.256918
Q9VKM2	Q9VKM2	SCAR	FALSE	0	1.74335	1.03874	2.44795	24.0502	6.26344	0.00125518	0.0221494	-0.565928	0.00861544	0.278337
Q9VKM7	Q9VKM7	CG33129	FALSE	0	0.793919	0.191132	1.39671	25.5777	3.33416	0.019106	0.0884885	-3.59042	0.0344194	0.238116
Q9VKN7	Q9VKN7	aurB	TRUE	1	0.746967	-0.683661	2.17759	23.3213	1.32175	0.240721	0.396355	-6.21264	0.15417	0.565135
Q9VKU1	Q9VKU1	Fatp1	FALSE	0	-0.663102	-1.46198	0.135775	22.974	-2.10124	0.0867616	0.213148	-5.21284	0.0829081	0.315577
Q9VKV5	Q9VKV5	holn1	TRUE	3	1.22605	0.609919	1.84218	22.2374	5.03743	0.00342872	0.0375112	-1.68281	0.0145907	0.243388
Q9VKW1	Q9VKW1	Wdfy2	TRUE	3	0.0185102	-0.654525	0.691546	21.4305	0.0696224	0.947059	0.967686	-7.10048	0.376401	0.265866
Q9VKW3	Q9VKW3	RfC3	FALSE	0	0.759949	0.156525	1.36337	24.4832	3.18814	0.0225945	0.0975949	-3.77444	0.0379615	0.238368
Q9VKW8	Q9VKW8	CG17768	TRUE	3	0.486366	-0.486091	1.45882	21.5568	1.2661	0.258561	0.414548	-6.27709	0.161247	0.384145
Q9VKZ0	Q9VKZ0	GATAd	FALSE	0	0.141648	-0.480691	0.763988	23.2817	0.576181	0.588229	0.713468	-6.91313	0.277518	0.24584
Q9VL18	Q9VL18	eEF1delta	FALSE	0	0.0854649	-0.632042	0.802972	24.7641	0.301534	0.774546	0.853337	-7.05007	0.331923	0.283433
Q9VL25	Q9VL25	CG4901	FALSE	0	-0.875553	-1.47834	-0.272766	25.8952	-3.677	0.013059	0.071454	-3.17066	0.0277935	0.238116
Q9VL26	Q9VL26	CG5727	TRUE	4	-0.266686	-0.999066	0.465693	21.144	-0.921805	0.396869	0.550067	-6.63805	0.21396	0.289309
Q9VL70	Q9VL70	yip2	TRUE	2	-0.00522682	-0.911424	0.90097	21.6558	-0.0146012	0.988887	0.992522	-7.10321	0.386061	0.357971
Q9VL71	Q9VL71	Srp54	FALSE	0	-0.516236	-1.43309	0.400622	26.3771	-1.42535	0.210496	0.361314	-6.08912	0.14054	0.362182
Q9VL75	Q9VL75	Bka	TRUE	1	0.522053	-0.708188	1.75229	22.1622	1.07423	0.329423	0.483695	-6.48713	0.188143	0.485977
Q9VL91	Q9VL91	zf30C	FALSE	0	0.111985	-0.508264	0.732234	26.1715	0.457054	0.665859	0.780793	-6.98229	0.303705	0.245014
Q9VL96	Q9VL96	CG4364	FALSE	0	0.232852	-0.751392	1.2171	26.6696	0.598898	0.574058	0.700389	-6.89833	0.272431	0.388802
Q9VLA6	Q9VLA6	brwl	TRUE	3	0.588315	-0.413715	1.59035	22.012	1.48629	0.194418	0.344758	-6.01455	0.134101	0.395828
Q9VLC5	Q9VLC5	Aldh	FALSE	0	-0.460117	-1.06586	0.145625	24.9355	-1.9229	0.109549	0.243291	-5.45139	0.094633	0.239284
Q9VLD6	Q9VLD6	borr	FALSE	0	0.264232	-0.673228	1.20169	24.2863	0.713522	0.505871	0.648115	-6.81624	0.252097	0.370321
Q9VLK1	Q9VLK1	CG13097	FALSE	0	1.67583	0.869831	2.48182	25.5275	5.26346	0.0028127	0.034134	-1.46214	0.0132771	0.318389
Q9VLK8	Q9VLK8	prg	TRUE	4	0.310864	-0.956598	1.57833	21.5544	0.620884	0.560545	0.68738	-6.88354	0.26737	0.50068
Q9VLL1	Q9VLL1	D12	TRUE	2	-0.276453	-1.38828	0.835376	21.9696	-0.629446	0.555337	0.68331	-6.87765	0.265787	0.439201
Q9VLM5	Q9VLM5	Dad1	TRUE	1	-0.515654	-2.15703	1.12572	21.8796	-0.795289	0.46075	0.610069	-6.7505	0.237299	0.648385
Q9VLM8	Q9VLM8	AlaRS	FALSE	0	-0.323303	-0.969205	0.3226	24.4581	-1.26712	0.258223	0.414548	-6.27592	0.161247	0.255148
Q9VLN1	Q9VLN1	Wdr82	TRUE	4	-0.913149	-1.58557	-0.24073	21.3126	-3.43777	0.0169973	0.0824901	-3.46172	0.0320862	0.265623
Q9VLV5	Q9VLV5	SmE	FALSE	0	2.55995	1.85405	3.26585	23.3936	9.18041	0.000194249	0.00900364	1.46146	0.00350215	0.278849
Q9VLX2	Q9VLX2	CG7154	TRUE	2	0.227113	-0.792018	1.24624	22.5697	0.564141	0.595825	0.720869	-6.92077	0.280397	0.402583
Q9VM17	Q9VM17	CG5181	TRUE	3	0.676053	0.0649046	1.2872	22.3079	2.80033	0.0358432	0.126192	-4.27661	0.0490851	0.241419
Q9VM49	Q9VM49	Caper	FALSE	0	0.561182	-0.388941	1.51131	26.3266	1.4952	0.192168	0.342447	-6.00354	0.133202	0.375323
Q9VM57	Q9VM57	sip2	TRUE	3	0.406696	-0.349343	1.16273	22.0326	1.36176	0.2286	0.382053	-6.16546	0.148607	0.298655
Q9VM62	Q9VM62	SA	FALSE	0	1.06817	0.400954	1.73539	25.7672	4.05273	0.00878817	0.0599834	-2.73133	0.0233318	0.263569
Q9VM69	Q9VM69	nop5	FALSE	0	-0.425803	-1.03796	0.186351	29.7788	-1.76085	0.135564	0.277064	-5.66499	0.10777	0.241816
Q9VM72	Q9VM72	CG13773	TRUE	4	-0.613116	-1.40804	0.181808	20.9265	-1.9525	0.105376	0.23898	-5.41198	0.0929562	0.314015
Q9VM75	Q9VM75	l(2)k09022	FALSE	0	-0.427658	-1.02576	0.170443	28.4082	-1.81008	0.12706	0.265688	-5.60053	0.103345	0.236265
Q9VM95	Q9VM95	Aatf	FALSE	0	1.44246	0.834696	2.05021	25.7614	6.00822	0.00152684	0.024824	-0.782933	0.00965578	0.24008
Q9VMC8	Q9VMC8	Phf5a	TRUE	2	2.13431	1.42153	2.84708	22.5659	7.58013	0.000501113	0.0133815	0.442576	0.00520502	0.281566
Q9VMJ1	Q9VMJ1	CG9107	TRUE	1	0.967821	0.292833	1.64281	23.0175	3.62972	0.0137474	0.0724887	-3.22748	0.028196	0.266638
Q9VMM3	Q9VMM3	CG7239	FALSE	0	2.63808	1.69459	3.58157	23.6638	7.07823	0.000699184	0.0148782	0.0786543	0.00578719	0.372704
Q9VMM7	Q9VMM7	CG11030	FALSE	0	2.19319	1.58258	2.80381	24.9161	9.09251	0.000203822	0.00900364	1.41045	0.00350215	0.241209
Q9VMV5	Q9VMV5	vkg	FALSE	0	-0.324001	-1.46438	0.816377	27.3621	-0.719237	0.502621	0.645908	-6.81183	0.251239	0.450478
Q9VMX2	Q9VMX2	l(2)05714	FALSE	0	1.03884	0.339037	1.73864	24.0901	3.75792	0.0119692	0.0692778	-3.07418	0.026947	0.27644
Q9VMX3	Q9VMX3	CG3756	FALSE	0	1.27019	0.400452	2.13993	24.4221	3.69704	0.0127789	0.070935	-3.14667	0.0275916	0.34357
Q9VMY1	Q9VMY1	mRpL24	TRUE	3	1.18861	0.513411	1.86381	21.8175	4.45638	0.00587878	0.0494569	-2.28382	0.0192373	0.266721
Q9VN21	Q9VN21	lost	FALSE	0	0.544796	-0.5338	1.62339	27.2821	1.27864	0.254437	0.411824	-6.26269	0.160187	0.426073
Q9VN25	Q9VN25	eIF3a	FALSE	0	-0.241398	-1.09855	0.615757	24.9673	-0.712935	0.506206	0.648115	-6.81669	0.252097	0.338598
Q9VN31	Q9VN31	Fip1	TRUE	3	2.00146	1.10753	2.89538	22.4942	5.66788	0.00200334	0.0292812	-1.08451	0.0113895	0.353123
Q9VN39	Q9VN39	CG9775	FALSE	0	0.444354	-0.455663	1.34437	26.2917	1.24984	0.263995	0.420705	-6.29565	0.163642	0.35553
Q9VN44	Q9VN44	Karybeta3	FALSE	0	-0.761543	-1.40134	-0.121745	24.0675	-3.01319	0.0277441	0.109637	-3.99871	0.0426454	0.252737
Q9VN50	Q9VN50	eIF3f1	FALSE	0	1.2751	0.550817	1.99939	22.4347	4.45666	0.00587716	0.0494569	-2.28352	0.0192373	0.286112
Q9VN55	Q9VN55	atms	FALSE	0	0.787785	0.166942	1.40863	22.4669	3.21219	0.0219739	0.0957717	-3.74393	0.0372523	0.245249
Q9VN88	Q9VN88	Vps37B	TRUE	3	1.98723	1.01865	2.95582	22.7367	5.1938	0.00298774	0.034492	-1.52939	0.0134164	0.382616
Q9VNA3	Q9VNA3	CG11999	FALSE	0	4.37369	3.68006	5.06731	24.4565	15.9623	1.15359e-05	0.00185023	4.24815	0.000719684	0.274001
Q9VNB9	Q9VNB9	RpL35A	FALSE	0	-0.0609107	-0.731477	0.609655	25.7681	-0.229946	0.826794	0.890627	-7.07225	0.346427	0.264891
Q9VND7	Q9VND7	CG2931	TRUE	1	0.850794	-0.642545	2.34413	22.128	1.44225	0.205915	0.35556	-6.06857	0.138302	0.589907
Q9VNE0	Q9VNE0	CG2926	FALSE	0	0.923138	0.254014	1.59226	25.0898	3.49249	0.0159901	0.0792387	-3.39438	0.0308215	0.264321
Q9VNE9	Q9VNE9	RpL13A	FALSE	0	-0.38596	-1.05576	0.283843	27.5682	-1.45871	0.201544	0.351366	-6.04846	0.136671	0.264589
Q9VNF7	Q9VNF7	MTA1-like	FALSE	0	-0.195237	-0.97811	0.587637	24.1368	-0.631313	0.554206	0.683106	-6.87636	0.265708	0.309255
Q9VNG2	Q9VNG2	Wdr33	TRUE	4	-0.411068	-1.05249	0.230356	21.3833	-1.62235	0.162662	0.309292	-5.84376	0.120305	0.253379
Q9VNH6	Q9VNH6	Sec8	TRUE	1	-1.33152	-1.94293	-0.72011	21.5214	-5.51302	0.00227629	0.0312869	-1.22656	0.0121697	0.241523
Q9VNI5	Q9VNI5	CG10979	TRUE	2	-0.383532	-1.23213	0.465063	21.5603	-1.14413	0.301862	0.454049	-6.41297	0.176611	0.335217
Q9VNI8	Q9VNI8	Hpr1	FALSE	0	-0.443703	-1.11677	0.229366	24.5672	-1.66881	0.153021	0.299623	-5.78426	0.116544	0.265879
Q9VNP3	Q9VNP3	Mes2	FALSE	0	1.09262	0.381217	1.80403	25.6189	3.88801	0.0104268	0.0644845	-2.92122	0.0250826	0.281023
Q9VNP8	Q9VNP8	Ssl1	FALSE	0	-1.21477	-1.82645	-0.603101	24.0614	-5.02749	0.00345922	0.0375112	-1.69268	0.0145907	0.241626
Q9VNV3	Q9VNV3	Ddx1	FALSE	0	-0.72022	-1.3506	-0.0898415	25.1901	-2.89227	0.0320626	0.118353	-4.15595	0.0460359	0.249016
Q9VNZ3	Q9VNZ3	Rpb8	FALSE	0	1.18135	0.353496	2.0092	24.4753	3.61244	0.0140093	0.0724887	-3.24835	0.028196	0.327022
Q9VP12	Q9VP12	SMC5	TRUE	2	-0.598109	-1.37082	0.174606	21.3366	-1.95946	0.10442	0.238321	-5.40271	0.0926999	0.305242
Q9VP47	Q9VP47	Tsr1	TRUE	4	0.456293	-0.527898	1.44048	21.6238	1.17365	0.290834	0.44486	-6.38081	0.173037	0.388781
Q9VP57	Q9VP57	pzg	FALSE	0	-0.268054	-0.883478	0.347369	27.8403	-1.10261	0.317984	0.472891	-6.45737	0.18394	0.243108
Q9VPC0	Q9VPC0	Pitslre	FALSE	0	-0.0743711	-0.771424	0.622681	25.4938	-0.270093	0.797349	0.872081	-7.06053	0.339214	0.275354
Q9VPH2	Q9VPH2	DNApol-alpha60	TRUE	2	1.34732	0.0325196	2.66212	22.9181	2.59409	0.0462294	0.145626	-4.55023	0.0566442	0.51938
Q9VPH4	Q9VPH4	kin17	TRUE	2	0.252654	-0.763024	1.26833	22.0466	0.629717	0.555173	0.68331	-6.87746	0.265787	0.401219
Q9VPH8	Q9VPH8	Rbbp5	TRUE	4	-0.260318	-1.91362	1.39299	21.4398	-0.398591	0.705835	0.804208	-7.01085	0.312813	0.653097
Q9VPJ9	Q9VPJ9	CG3164	FALSE	0	-1.18606	-1.8196	-0.552516	25.0457	-4.7392	0.00449662	0.0428067	-1.98508	0.0166505	0.250266
Q9VPK4	Q9VPK4	CG11454	TRUE	4	0.351542	-0.89785	1.60093	20.753	0.712284	0.506577	0.648115	-6.81719	0.252097	0.493542
Q9VPL0	Q9VPL0	CG3436	FALSE	0	1.71156	0.959616	2.46351	23.9619	5.7621	0.00185594	0.0280984	-0.999582	0.0109294	0.297038
Q9VPM0	Q9VPM0	Rpp30	TRUE	3	-0.664383	-2.26099	0.932226	21.513	-1.0534	0.338039	0.492095	-6.50866	0.19141	0.630702
Q9VPM5	Q9VPM5	mbm	FALSE	0	1.75732	0.399172	3.11547	23.4625	3.27551	0.0204291	0.0917793	-3.66398	0.0356994	0.536503
Q9VPN5	Q9VPN5	Stip1	FALSE	0	0.115106	-0.682781	0.912994	22.4806	0.365202	0.729163	0.819176	-7.02551	0.318635	0.315186
Q9VPQ2	Q9VPQ2	shv	TRUE	3	0.522376	-0.0712491	1.116	22.2562	2.22764	0.0736457	0.193053	-5.04269	0.0750919	0.234497
Q9VPQ7	Q9VPQ7	Spp	TRUE	2	-0.562371	-2.39813	1.27339	22.7793	-0.775501	0.471395	0.620597	-6.76693	0.241394	0.725171
Q9VPR5	Q9VPR5	Sf3b1	FALSE	0	1.08965	0.13736	2.04195	26.5151	2.89663	0.0318946	0.118353	-4.15025	0.0460359	0.376181
Q9VPU7	Q9VPU7	aru	FALSE	0	0.9582	-0.28483	2.20123	22.6265	1.95141	0.105527	0.23898	-5.41343	0.0929562	0.491029
Q9VPU8	Q9VPU8	dbe	FALSE	0	0.216668	-0.515145	0.948481	25.0595	0.749495	0.485652	0.63151	-6.78802	0.245638	0.289085
Q9VPY0	Q9VPY0	IntS14	TRUE	1	0.991679	-0.57928	2.56264	22.594	1.59802	0.167945	0.316016	-5.87469	0.122921	0.620569
Q9VPY2	Q9VPY2	Plap	TRUE	4	-0.904204	-1.66826	-0.140146	20.9829	-2.99581	0.028323	0.110467	-4.02119	0.0429685	0.301823
Q9VPY4	Q9VPY4	CG4887	FALSE	0	0.270302	-0.337491	0.878095	24.4203	1.12582	0.308884	0.461731	-6.43268	0.1796	0.240094
Q9VQ27	Q9VQ27	CG14352	TRUE	3	2.25048	1.57129	2.92967	22.6983	8.38804	0.000304441	0.0104887	0.981822	0.00407979	0.268297
Q9VQ29	Q9VQ29	RFeSP	TRUE	2	0.361266	-0.968755	1.69129	21.6614	0.687612	0.520788	0.65674	-6.83585	0.255452	0.525393
Q9VQ30	Q9VQ30	chinmo	TRUE	2	1.11476	-0.119217	2.34873	22.1655	2.28691	0.0682331	0.185589	-4.96281	0.0721885	0.487452
Q9VQ40	Q9VQ40	CG17652	FALSE	0	-0.600843	-1.36754	0.16585	23.0147	-1.98388	0.101132	0.234844	-5.37012	0.0913472	0.302863
Q9VQ58	Q9VQ58	CG15356	FALSE	0	0.153122	-0.460911	0.767155	24.2988	0.631278	0.554227	0.683106	-6.87638	0.265708	0.242559
Q9VQ61	Q9VQ61	Got2	TRUE	2	-0.603749	-1.5609	0.353401	20.9159	-1.5968	0.168212	0.31603	-5.87623	0.122926	0.378099
Q9VQ77	Q9VQ77	CG11723	TRUE	3	-0.0810873	-0.88714	0.724966	21.6166	-0.254662	0.808625	0.878921	-7.06525	0.341874	0.318411
Q9VQ94	Q9VQ94	Sec24CD	TRUE	3	-0.900484	-1.8707	0.0697312	21.6629	-2.34954	0.0629699	0.177271	-4.87843	0.0689532	0.38326
Q9VQF5	Q9VQF5	Cwc25	FALSE	0	-0.401781	-1.42128	0.617722	23.8815	-0.997644	0.362031	0.513587	-6.56492	0.19977	0.40273
Q9VQG4	Q9VQG4	colt	TRUE	2	-0.0376268	-1.4205	1.34525	21.7532	-0.0688793	0.947623	0.967686	-7.10054	0.376401	0.546272
Q9VQI6	Q9VQI6	CG8814	TRUE	2	1.61097	0.926568	2.29538	22.4955	5.95867	0.00158723	0.0252387	-0.825957	0.0098171	0.270358
Q9VQJ6	Q9VQJ6	CG9641	FALSE	0	1.12263	0.500074	1.74519	22.9543	4.56492	0.00529729	0.0481251	-2.16775	0.0187192	0.245925
Q9VQK5	Q9VQK5	CG3542	FALSE	0	0.579423	-0.187633	1.34648	24.3072	1.91225	0.111092	0.245795	-5.46554	0.0956068	0.303006
Q9VQK7	Q9VQK7	Sf3b2	FALSE	0	0.954788	0.32099	1.58859	25.0761	3.81356	0.0112798	0.0671684	-3.00844	0.0261265	0.250366
Q9VQL7	Q9VQL7	FASN1	TRUE	1	-0.65183	-1.40334	0.0996807	21.5729	-2.1957	0.0767494	0.197258	-5.08572	0.0767275	0.296866
Q9VQQ9	Q9VQQ9	Sec5	TRUE	4	-0.0747023	-0.928251	0.778846	21.4958	-0.221555	0.832992	0.894168	-7.07447	0.347805	0.337173
Q9VQR8	Q9VQR8	LeuRS	FALSE	0	-0.609464	-1.41968	0.20075	24.7441	-1.90425	0.112265	0.24688	-5.47616	0.096029	0.320055
Q9VQR9	Q9VQR9	CG17593	TRUE	4	0.101941	-0.501186	0.705068	21.5783	0.427873	0.685668	0.790369	-6.997	0.30743	0.238251
Q9VQU8	Q9VQU8	CG43707	TRUE	3	0.143916	-0.692943	0.980775	21.7677	0.435343	0.68057	0.789723	-6.99332	0.307179	0.330581
Q9VQZ8	Q9VQZ8	CG15439	FALSE	0	-0.713443	-1.38179	-0.0450943	23.4169	-2.70228	0.0404222	0.136495	-4.40622	0.0530925	0.264015
Q9VR89	Q9VR89	l(1)G0004	FALSE	0	0.368497	-0.695465	1.43246	22.8226	0.876763	0.418782	0.571139	-6.67951	0.222156	0.420292
Q9VR99	Q9VR99	cactin	FALSE	0	0.00377971	-0.622145	0.629705	25.7305	0.0152866	0.988366	0.992522	-7.1032	0.386061	0.247256
Q9VRE9	Q9VRE9	CG1503	TRUE	4	-1.57431	-2.35854	-0.790075	21.0545	-5.08183	0.00329628	0.0369745	-1.63891	0.014382	0.309792
Q9VRI0	Q9VRI0	Hlc	FALSE	0	-0.335875	-1.06549	0.393739	26.226	-1.16536	0.293896	0.448554	-6.38989	0.174474	0.288216
Q9VRJ4	Q9VRJ4	CG10672	FALSE	0	1.57363	0.747444	2.39981	23.634	4.8217	0.00416687	0.0412976	-1.90017	0.0160636	0.326363
Q9VRL0	Q9VRL0	Cyt-c1	FALSE	0	-0.786354	-1.43008	-0.142625	24.0253	-3.09236	0.0252676	0.105064	-3.89673	0.0408667	0.254289
Q9VRL8	Q9VRL8	blanks	FALSE	0	-0.106662	-0.710831	0.497508	26.1503	-0.446915	0.672708	0.785641	-6.98751	0.305591	0.238662
Q9VRM6	Q9VRM6	l(3)psg2	FALSE	0	-0.0869346	-1.21398	1.04011	23.9228	-0.195266	0.852491	0.90412	-7.08089	0.351676	0.44521
Q9VRP5	Q9VRP5	scny	FALSE	0	-0.167853	-0.761422	0.425716	25.5873	-0.715868	0.504535	0.647793	-6.81443	0.251972	0.234475
Q9VRQ2	Q9VRQ2	mad2	FALSE	0	0.298541	-1.06538	1.66246	22.3126	0.554104	0.602202	0.726155	-6.92703	0.282453	0.538782
Q9VRV4	Q9VRV4	D19B	FALSE	0	-0.0640336	-0.862391	0.734324	24.2015	-0.203042	0.846711	0.903533	-7.07907	0.351447	0.315372
Q9VRV5	Q9VRV5	D19A	FALSE	0	-0.173527	-0.835543	0.488489	25.0093	-0.663549	0.534904	0.668401	-6.85352	0.259988	0.261513
Q9VRV7	Q9VRV7	Sf3b6	FALSE	0	1.03049	0.384097	1.67688	23.4003	4.03573	0.00894289	0.0601877	-2.75073	0.0234112	0.255341
Q9VRX7	Q9VRX7	Rexo5	FALSE	0	0.0694898	-0.708649	0.847629	24.8716	0.226068	0.829657	0.892575	-7.07329	0.347185	0.307385
Q9VS55	Q9VS55	CTCF	TRUE	3	-0.346821	-1.41869	0.725046	21.6484	-0.819104	0.448172	0.596601	-6.7303	0.23206	0.423415
Q9VS57	Q9VS57	Sec63	TRUE	4	0.377909	-0.27622	1.03204	21.4626	1.46251	0.200549	0.350485	-6.04381	0.136328	0.258398
Q9VSD6	Q9VSD6	msk	TRUE	4	-0.378902	-1.05043	0.292629	21.1369	-1.42835	0.209675	0.360761	-6.08548	0.140325	0.265272
Q9VSE1	Q9VSE1	CG7504	FALSE	0	-0.774955	-1.82003	0.270116	21.8902	-1.87718	0.116329	0.251987	-5.51203	0.0980156	0.41283
Q9VSW5	Q9VSW5	Klp67A	FALSE	0	0.244333	-0.579221	1.06789	23.5761	0.751043	0.484795	0.63151	-6.78678	0.245638	0.325325
Q9VSY2	Q9VSY2	Cpsf5	FALSE	0	1.12703	0.477488	1.77657	24.6252	4.39241	0.00625578	0.051682	-2.35307	0.0201027	0.256586
Q9VT00	Q9VT00	Jarid2	FALSE	0	-0.519914	-1.47747	0.437646	22.7211	-1.37449	0.224865	0.377471	-6.15031	0.146825	0.378261
Q9VT19	Q9VT19	CG3335	FALSE	0	-0.451669	-1.07868	0.175341	23.8971	-1.82356	0.124826	0.263577	-5.5828	0.102524	0.247685
Q9VT32	Q9VT32	Prps	TRUE	3	0.387076	-0.212189	0.986341	21.575	1.63513	0.159951	0.306962	-5.82744	0.119399	0.236725
Q9VT38	Q9VT38	CG18178	TRUE	2	0.857837	-0.258385	1.97406	22.8397	1.94549	0.10635	0.239935	-5.42132	0.0933274	0.440937
Q9VT41	Q9VT41	defl	FALSE	0	-0.940196	-1.99263	0.112238	22.4568	-2.26151	0.0704994	0.189263	-4.99705	0.0736176	0.415739
Q9VT61	Q9VT61	CG8108	FALSE	0	0.708251	0.044784	1.37172	27.1136	2.70236	0.0404185	0.136495	-4.40613	0.0530925	0.262086
Q9VTC1	Q9VTC1	CG6418	FALSE	0	0.655757	-0.0653728	1.37689	24.6353	2.30199	0.0669239	0.183407	-4.94249	0.0713399	0.284865
Q9VTE6	Q9VTE6	CG7839	FALSE	0	-0.100331	-0.943549	0.742888	26.788	-0.301209	0.77478	0.853337	-7.05019	0.331923	0.333093
Q9VTN7	Q9VTN7	CG10907	FALSE	0	0.813223	0.0202915	1.60615	23.963	2.59626	0.0461043	0.145626	-4.54733	0.0566442	0.313228
Q9VTP4	Q9VTP4	RpL10Ab	FALSE	0	0.874915	0.0506009	1.69923	26.1441	2.68688	0.0411982	0.138315	-4.42667	0.0538004	0.325625
Q9VTT2	Q9VTT2	vers	FALSE	0	1.08752	0.401007	1.77404	24.2649	4.01017	0.00918149	0.0609958	-2.77999	0.0237256	0.271191
Q9VTT3	Q9VTT3	ssp	TRUE	1	1.39646	0.58084	2.21207	23.0628	4.33427	0.00662265	0.0525181	-2.41655	0.020428	0.322189
Q9VTU0	Q9VTU0	CG5645	FALSE	0	-0.00366636	-0.603917	0.596584	24.5959	-0.0154624	0.988232	0.992522	-7.1032	0.386061	0.237114
Q9VTU2	Q9VTU2	ND-SGDH	TRUE	2	0.342411	-0.544452	1.22927	22.0505	0.977385	0.371086	0.523865	-6.58485	0.203768	0.350334
Q9VTU4	Q9VTU4	eIF3l	FALSE	0	0.886676	0.202303	1.57105	24.6854	3.2798	0.020329	0.0916389	-3.65859	0.0356448	0.270345
Q9VTY2	Q9VTY2	CG10638	TRUE	1	-0.085463	-1.18087	1.00994	22.5651	-0.197505	0.850826	0.90412	-7.08037	0.351676	0.432713
Q9VTY8	Q9VTY8	sti	FALSE	0	-1.18945	-1.89081	-0.488087	23.4916	-4.29317	0.00689693	0.0533682	-2.46173	0.0207587	0.277056
Q9VTZ1	Q9VTZ1	Gcn5	TRUE	3	-0.367728	-1.03348	0.298025	21.3391	-1.39826	0.218038	0.369439	-6.12183	0.143701	0.26299
Q9VU02	Q9VU02	SmD1	TRUE	1	1.13462	0.302745	1.9665	24.6632	3.45277	0.0167143	0.0819852	-3.44322	0.0318898	0.328612
Q9VU43	Q9VU43	Srrm1	FALSE	0	0.492076	-0.121364	1.10552	25.0656	2.03065	0.0951295	0.226402	-5.30756	0.0880636	0.242325
Q9VU88	Q9VU88	Liprin-beta	TRUE	4	-0.498873	-1.11982	0.122075	21.1707	-2.03381	0.0947378	0.225841	-5.30333	0.0878455	0.24529
Q9VUB5	Q9VUB5	upSET	FALSE	0	-0.253285	-0.91331	0.406741	24.2991	-0.971455	0.373772	0.526116	-6.59063	0.204644	0.260727
Q9VUC3	Q9VUC3	CG6833	TRUE	1	2.42612	1.47087	3.38136	22.7057	6.42941	0.00110878	0.020309	-0.428834	0.00789959	0.377346
Q9VUC6	Q9VUC6	Frl	FALSE	0	-0.69039	-1.35061	-0.0301658	23.601	-2.64715	0.0432756	0.142112	-4.4795	0.0552775	0.260805
Q9VUE5	Q9VUE5	stwl	FALSE	0	0.317408	-0.547005	1.18182	26.6196	0.929547	0.393195	0.546771	-6.63077	0.212678	0.341465
Q9VUM1	Q9VUM1	Prp31	FALSE	0	-0.295261	-0.911154	0.320632	23.8168	-1.2136	0.276473	0.432027	-6.33653	0.168046	0.243294
Q9VUN7	Q9VUN7	CG7275	FALSE	0	-0.399613	-1.17924	0.380017	25.8625	-1.29755	0.248335	0.40502	-6.24084	0.157541	0.307974
Q9VUQ5	Q9VUQ5	AGO2	FALSE	0	0.0170455	-0.596526	0.630617	27.5182	0.0703268	0.946525	0.967686	-7.10042	0.376401	0.242376
Q9VUR1	Q9VUR1	mrn	TRUE	2	-0.644195	-1.50258	0.214194	21.2484	-1.8998	0.112922	0.247949	-5.48205	0.0964447	0.339085
Q9VUR2	Q9VUR2	CG12301	FALSE	0	0.86635	0.184972	1.54773	27.1283	3.2187	0.0218092	0.0956302	-3.73568	0.0371973	0.269162
Q9VUV9	Q9VUV9	l(3)72Ab	FALSE	0	-0.0929959	-0.726047	0.540055	28.349	-0.371877	0.724472	0.816762	-7.02268	0.317696	0.250071
Q9VUZ0	Q9VUZ0	SsRbeta	TRUE	2	1.19189	0.117587	2.26618	22.1575	2.80856	0.0354852	0.125543	-4.26576	0.0488325	0.424375
Q9VUZ2	Q9VUZ2	elg1	FALSE	0	-0.776598	-1.60861	0.0554104	22.5723	-2.36289	0.061905	0.175985	-4.86045	0.068453	0.328665
Q9VUZ6	Q9VUZ6	l(3)72Dn	FALSE	0	-0.82574	-1.50833	-0.143154	25.9464	-3.06239	0.0261748	0.10639	-3.93523	0.0413827	0.269639
Q9VV52	Q9VV52	RAF2	FALSE	0	0.197669	-0.471832	0.86717	28.5444	0.747415	0.486806	0.631756	-6.78969	0.245734	0.26447
Q9VV75	Q9VV75	UQCR-C2	FALSE	0	0.271852	-0.376926	0.92063	25.4312	1.06075	0.334981	0.488626	-6.5011	0.190061	0.256284
Q9VVA6	Q9VVA6	nudC	TRUE	4	-0.321868	-0.934004	0.290268	21.5733	-1.33108	0.237843	0.392875	-6.2017	0.152817	0.241809
Q9VVA7	Q9VVA7	TSG101	TRUE	3	0.618917	0.00994065	1.22789	21.753	2.5728	0.0474757	0.147762	-4.57867	0.0574751	0.240561
Q9VVA9	Q9VVA9	Zcchc7	FALSE	0	-0.493943	-1.11985	0.131968	24.3259	-1.99774	0.0993127	0.232157	-5.35159	0.0903023	0.247251
Q9VVC5	Q9VVC5	Nc73EF	FALSE	0	-0.479874	-1.12992	0.170171	22.9644	-1.86878	0.11762	0.254023	-5.52314	0.0988075	0.256785
Q9VVC9	Q9VVC9	CG7728	FALSE	0	0.119901	-0.630506	0.870307	26.3563	0.404483	0.701755	0.800189	-7.00814	0.31125	0.29643
Q9VVE2	Q9VVE2	rogdi	TRUE	4	-0.710639	-1.69799	0.276707	21.429	-1.82202	0.125079	0.263577	-5.58482	0.102524	0.390027
Q9VVG4	Q9VVG4	Sec3	TRUE	2	-0.205543	-1.01875	0.607667	22.4817	-0.639845	0.549054	0.680207	-6.87041	0.26458	0.321239
Q9VVH5	Q9VVH5	UQCR-Q	TRUE	1	2.21945	1.28479	3.15411	24.7218	6.01125	0.00152322	0.024824	-0.780305	0.00965578	0.369215
Q9VVI0	Q9VVI0	U4-U6-60K	FALSE	0	0.640777	0.0239584	1.2576	24.9619	2.62981	0.0442176	0.143459	-4.50259	0.0558015	0.243659
Q9VVI1	Q9VVI1	CG7564	FALSE	0	0.59549	-0.381273	1.57225	23.2064	1.54333	0.180435	0.330492	-5.94361	0.128552	0.385846
Q9VVK8	Q9VVK8	CG5589	FALSE	0	0.161222	-0.443245	0.765688	24.8016	0.67519	0.528044	0.663264	-6.84504	0.25799	0.23878
Q9VVL8	Q9VVL8	TrpRS-m	TRUE	1	-0.76994	-1.83566	0.295776	22.1458	-1.8289	0.123952	0.262605	-5.57578	0.102146	0.420985
Q9VVU1	Q9VVU1	CG3902	FALSE	0	-0.610002	-1.23634	0.0163374	23.9318	-2.46545	0.05434	0.16179	-4.72252	0.0629315	0.24742
Q9VVU2	Q9VVU2	RpL26	FALSE	0	0.756922	0.135693	1.37815	25.4651	3.08442	0.0255043	0.105316	-3.90691	0.0409648	0.245402
Q9VVU6	Q9VVU6	CG6841	FALSE	0	1.19054	0.452807	1.92827	26.024	4.08526	0.00850046	0.0588525	-2.69433	0.0228919	0.291423
Q9VW10	Q9VW10	CG9300	FALSE	0	0.418317	-0.418356	1.25499	25.7911	1.26568	0.258698	0.414548	-6.27757	0.161247	0.330507
Q9VW15	Q9VW15	ash1	TRUE	4	0.0351722	-0.956626	1.02697	21.4694	0.089774	0.93178	0.959634	-7.09858	0.373269	0.391786
Q9VW37	Q9VW37	SREBP	TRUE	4	-1.33704	-2.50905	-0.165024	21.4784	-2.88792	0.0322309	0.118672	-4.16163	0.0461599	0.462975
Q9VW51	Q9VW51	Su(Tpl)	TRUE	3	-1.05372	-2.23992	0.132475	20.94	-2.24876	0.0716664	0.191331	-5.01422	0.074422	0.468578
Q9VW53	Q9VW53	Mtr3	FALSE	0	1.88105	1.22586	2.53625	24.2887	7.26781	0.000615121	0.0148782	0.218906	0.00578719	0.25882
Q9VW54	Q9VW54	Rpn1	TRUE	4	-0.447832	-1.50885	0.613185	21.307	-1.06848	0.331783	0.48494	-6.4931	0.188627	0.419129
Q9VW59	Q9VW59	RhoGDI	TRUE	3	1.5964	0.605715	2.58709	22.1957	4.07925	0.00855277	0.0589326	-2.70115	0.022923	0.391346
Q9VWC7	Q9VWC7	CG12702	FALSE	0	-0.794483	-1.42292	-0.166041	26.0735	-3.20033	0.0222775	0.0968035	-3.75896	0.0376537	0.248251
Q9VWD0	Q9VWD0	parvin	TRUE	3	0.676986	0.00199799	1.35197	22.0325	2.53897	0.0495317	0.151207	-4.62393	0.0588152	0.266637
Q9VWD4	Q9VWD4	CG14230	FALSE	0	-0.185463	-0.886882	0.515957	25.5328	-0.66935	0.531478	0.666421	-6.84931	0.259218	0.277079
Q9VWG2	Q9VWG2	CG14220	TRUE	2	1.15721	0.266349	2.04806	22.5772	3.28835	0.020131	0.0910298	-3.64784	0.0354079	0.351911
Q9VWG3	Q9VWG3	RpS10b	FALSE	0	1.45848	0.798505	2.11846	24.4142	5.59431	0.00212797	0.0304869	-1.15162	0.0118585	0.260709
Q9VWH4	Q9VWH4	Idh3a	TRUE	1	-0.335099	-0.993696	0.323498	21.7496	-1.28804	0.25139	0.408695	-6.25186	0.15897	0.260163
Q9VWI1	Q9VWI1	pcm	TRUE	1	0.00553252	-0.971718	0.982783	22.3946	0.0143315	0.989092	0.992522	-7.10322	0.386061	0.386039
Q9VWK5	Q9VWK5	Ulp1	FALSE	0	0.610312	-0.17411	1.39473	26.5448	1.96959	0.103042	0.236714	-5.38919	0.0920748	0.309867
Q9VWL0	Q9VWL0	Mec2	TRUE	3	0.378054	-0.453412	1.20952	21.6782	1.15102	0.299255	0.452479	-6.40551	0.176001	0.32845
Q9VWL4	Q9VWL4	CG7556	TRUE	3	0.988424	0.351686	1.62516	22.3736	3.92968	0.00998157	0.0633479	-2.87278	0.0246405	0.251528
Q9VWN4	Q9VWN4	Flacc	FALSE	0	-0.0998396	-0.750979	0.5513	23.7903	-0.388154	0.71309	0.809233	-7.01556	0.314768	0.257217
Q9VWP1	Q9VWP1	Usp39	TRUE	2	-0.971684	-1.65425	-0.289114	21.6798	-3.60373	0.0141433	0.0725723	-3.25887	0.0282285	0.269633
Q9VWP5	Q9VWP5	htk	FALSE	0	-0.112616	-0.779752	0.55452	25.9574	-0.427326	0.686043	0.790369	-6.99727	0.30743	0.263536
Q9VWQ6	Q9VWQ6	CG18259	FALSE	0	0.0580196	-0.596239	0.712278	23.8824	0.224492	0.830821	0.893164	-7.0737	0.347414	0.258449
Q9VWQ7	Q9VWQ7	CG6891	TRUE	2	0.431722	-0.177559	1.041	21.6808	1.79375	0.12982	0.269125	-5.62196	0.104682	0.240682
Q9VWS1	Q9VWS1	CG6617	TRUE	3	1.1155	0.483065	1.74793	21.579	4.46508	0.00582954	0.0494569	-2.27445	0.0192373	0.249827
Q9VWS2	Q9VWS2	Nup35	FALSE	0	0.737387	-0.119484	1.59426	24.8846	2.17849	0.0784796	0.200282	-5.10891	0.0779038	0.338486
Q9VWV8	Q9VWV8	CG6179	TRUE	4	-0.172291	-0.796669	0.452086	21.1565	-0.69854	0.514461	0.653578	-6.82765	0.254222	0.246645
Q9VWY6	Q9VWY6	Taf8	TRUE	2	1.32378	0.509885	2.13767	22.6309	4.1174	0.00822675	0.0580688	-2.65794	0.022587	0.321508
Q9VX09	Q9VX09	Arp8	TRUE	1	-0.315855	-1.10741	0.475702	22.0324	-1.01014	0.356537	0.509791	-6.55249	0.198294	0.312685
Q9VX15	Q9VX15	CG8142	FALSE	0	0.233806	-0.580745	1.04836	24.4042	0.726627	0.498439	0.642665	-6.80609	0.249978	0.321769
Q9VX31	Q9VX31	IntS2	TRUE	2	-0.427949	-1.03988	0.183986	22.1143	-1.77036	0.133878	0.274394	-5.65258	0.106731	0.24173
Q9VX34	Q9VX34	CG5800	FALSE	0	0.77886	0.00540405	1.55232	25.9658	2.54917	0.0489022	0.149919	-4.61028	0.0583139	0.305535
Q9VX38	Q9VX38	CG8326	FALSE	0	0.651925	-0.0109403	1.31479	22.3924	2.4897	0.0527006	0.15854	-4.68997	0.0616674	0.261849
Q9VX44	Q9VX44	Ankle2	FALSE	0	-0.642684	-1.33508	0.0497157	21.6262	-2.34972	0.0629556	0.177271	-4.87819	0.0689532	0.273516
Q9VXE6	Q9VXE6	Nup153	FALSE	0	-0.175621	-1.2058	0.854559	26.7066	-0.431557	0.683152	0.790184	-6.9952	0.307358	0.406948
Q9VXE9	Q9VXE9	SMC3	FALSE	0	-0.54197	-1.15508	0.0711432	25.5344	-2.23774	0.0726926	0.192712	-5.02908	0.0749592	0.242195
Q9VXG1	Q9VXG1	hang	FALSE	0	-1.08333	-1.83444	-0.332214	23.322	-3.65115	0.0134304	0.0717116	-3.20169	0.0278937	0.296708
Q9VXK5	Q9VXK5	CG8939	FALSE	0	-0.101749	-0.725721	0.522222	28.1488	-0.412802	0.696013	0.79678	-7.00425	0.309924	0.246485
Q9VXL4	Q9VXL4	Rrp47	TRUE	3	1.00317	0.270106	1.73622	22.173	3.46424	0.0165014	0.0814932	-3.42909	0.0316984	0.289577
Q9VXN4	Q9VXN4	ArgRS	FALSE	0	-0.818723	-1.44441	-0.193038	25.2115	-3.3125	0.0195831	0.0895939	-3.61753	0.0348494	0.247161
Q9VXP3	Q9VXP3	mRpS30	TRUE	3	-0.488163	-1.25871	0.282385	21.5202	-1.60376	0.166682	0.314725	-5.86739	0.122418	0.304386
Q9VXQ5	Q9VXQ5	CCT6	FALSE	0	0.141099	-0.601841	0.884038	23.8777	0.480778	0.649974	0.767139	-6.96968	0.298394	0.29348
Q9VXR5	Q9VXR5	CG9281	TRUE	1	0.0980818	-0.933183	1.12935	21.8789	0.240765	0.818826	0.88487	-7.06927	0.344188	0.407376
Q9VXU3	Q9VXU3	CG6340	TRUE	2	1.63006	0.671482	2.58864	22.3237	4.30478	0.00681817	0.0530424	-2.44895	0.0206319	0.378663
Q9VXW3	Q9VXW3	CG12608	TRUE	1	-0.693301	-1.72553	0.338923	21.8085	-1.70029	0.146813	0.292225	-5.74368	0.113667	0.407755
Q9VXW9	Q9VXW9	CG5877	FALSE	0	-0.421166	-1.08359	0.241255	24.2691	-1.60951	0.165428	0.313317	-5.86009	0.121871	0.261673
Q9VY44	Q9VY44	mRNA-cap	TRUE	2	-0.932101	-1.62939	-0.234813	21.8689	-3.38396	0.0180578	0.0853909	-3.52836	0.0332145	0.275447
Q9VY97	Q9VY97	mus101	TRUE	4	-1.02106	-1.61402	-0.428104	21.4425	-4.35916	0.00646265	0.0522427	-2.38931	0.0203209	0.234234
Q9VYE3	Q9VYE3	CG15747	TRUE	1	2.0492	1.28656	2.81184	23.0626	6.80207	0.000847026	0.0170229	-0.131991	0.00662139	0.301261
Q9VYE9	Q9VYE9	CG1622	FALSE	0	0.386764	-0.253133	1.02666	26.6566	1.53007	0.183598	0.333751	-5.9602	0.129819	0.252776
Q9VYG2	Q9VYG2	Bap60	FALSE	0	0.155521	-0.438501	0.749542	23.2919	0.662767	0.535367	0.668401	-6.85409	0.259988	0.234654
Q9VYK0	Q9VYK0	Smr	FALSE	0	-0.899059	-1.62598	-0.172143	24.0944	-3.13097	0.0241498	0.102477	-3.84728	0.0398606	0.287151
Q9VYQ9	Q9VYQ9	Tango4	FALSE	0	0.440386	-0.220421	1.10119	23.6441	1.68707	0.149389	0.296523	-5.76075	0.115339	0.261036
Q9VYU5	Q9VYU5	Karl	FALSE	0	0.907408	-0.252298	2.06711	22.8818	1.98075	0.101547	0.234862	-5.3743	0.0913545	0.458113
Q9VYW5	Q9VYW5	CG2247	FALSE	0	-0.568161	-1.2489	0.112577	24.7729	-2.11284	0.0854616	0.212243	-5.19725	0.0825564	0.268909
Q9VYX1	Q9VYX1	e(y)2	TRUE	4	-0.615781	-1.6297	0.398133	21.7678	-1.53745	0.181832	0.331792	-5.95098	0.129057	0.400522
Q9VYY7	Q9VYY7	HP5	FALSE	0	1.19376	0.517811	1.86972	26.5513	4.47071	0.00579792	0.0494569	-2.26839	0.0192373	0.267019
Q9VZ02	Q9VZ02	CG1738	TRUE	4	1.70056	0.541401	2.85973	21.8794	3.71384	0.0125494	0.0707389	-3.12661	0.0275153	0.457899
Q9VZ04	Q9VZ04	GCS1	TRUE	3	0.224738	-0.85337	1.30285	22.0437	0.527702	0.619165	0.739958	-6.94301	0.287822	0.42588
Q9VZ22	Q9VZ22	Lint-1	TRUE	1	-0.685783	-1.32094	-0.0506304	22.2259	-2.73328	0.038909	0.133732	-4.36516	0.0520179	0.250902
Q9VZ27	Q9VZ27	CDK2AP1	TRUE	4	0.881877	-0.781861	2.54561	21.71	1.34183	0.234566	0.388794	-6.18905	0.151229	0.657219
Q9VZ60	Q9VZ60	CG2186	FALSE	0	1.56598	0.930133	2.20183	24.0145	6.23459	0.00128288	0.0223343	-0.590083	0.00868739	0.251177
Q9VZ62	Q9VZ62	feo	FALSE	0	2.02254	1.30284	2.74224	24.3632	7.11413	0.000682276	0.0148782	0.105484	0.00578719	0.284299
Q9VZ69	Q9VZ69	Imp	FALSE	0	0.58087	-0.0781577	1.2399	23.4244	2.23126	0.0733028	0.193053	-5.03782	0.0750919	0.260333
Q9VZC8	Q9VZC8	CG15019	TRUE	3	3.38667	2.75738	4.01596	23.4119	13.6237	2.61329e-05	0.0029088	3.4922	0.00113143	0.248586
Q9VZE4	Q9VZE4	CG1316	FALSE	0	0.500534	-0.368965	1.37003	23.8881	1.45727	0.201924	0.351606	-6.05023	0.136764	0.343474
Q9VZE6	Q9VZE6	CG11583	FALSE	0	-0.0510341	-0.6929	0.590832	27.4796	-0.201275	0.848023	0.90412	-7.07949	0.351676	0.253554
Q9VZF5	Q9VZF5	pav	FALSE	0	-0.705089	-1.32073	-0.089445	26.8026	-2.89927	0.0317931	0.118353	-4.14679	0.0460359	0.243195
Q9VZF6	Q9VZF6	CG14997	TRUE	4	0.177378	-0.708031	1.06279	21.2375	0.507143	0.632562	0.75026	-6.95497	0.291829	0.349759
Q9VZI1	Q9VZI1	Chd64	FALSE	0	1.30095	0.600399	2.0015	23.1867	4.70105	0.00465919	0.0440644	-2.02468	0.0171397	0.276736
Q9VZI2	Q9VZI2	Ack	FALSE	0	-0.363045	-0.95589	0.2298	24.2634	-1.55022	0.178813	0.328353	-5.93497	0.127719	0.234189
Q9VZJ3	Q9VZJ3	Rcd5	FALSE	0	-0.375938	-1.0543	0.302424	24.8663	-1.40291	0.216726	0.367647	-6.11624	0.143004	0.26797
Q9VZL3	Q9VZL3	Sc2	FALSE	0	-0.519024	-1.17218	0.13413	25.4723	-2.01162	0.0975255	0.230211	-5.33303	0.0895452	0.258013
Q9VZQ1	Q9VZQ1	Ythdc1	FALSE	0	0.507572	-0.261257	1.2764	23.545	1.67125	0.15253	0.299067	-5.78112	0.116328	0.303707
Q9VZQ3	Q9VZQ3	kst	FALSE	0	-0.979488	-1.60662	-0.352356	27.0391	-3.9538	0.00973374	0.0633479	-2.84487	0.0246405	0.247733
Q9VZQ8	Q9VZQ8	PHGPx	FALSE	0	-0.932754	-1.69788	-0.167626	21.9425	-3.08609	0.0254546	0.105316	-3.90478	0.0409648	0.302245
Q9VZS5	Q9VZS5	RpL28	FALSE	0	0.811745	0.161567	1.46192	25.6992	3.16054	0.0233307	0.100475	-3.80954	0.0390818	0.256837
Q9VZV8	Q9VZV8	CG16753	TRUE	3	2.82532	1.96708	3.68356	23.2943	8.33363	0.000314408	0.0105802	0.947178	0.00411538	0.339026
Q9VZY0	Q9VZY0	Non2	TRUE	1	0.338288	-0.351	1.02758	22.1061	1.2424	0.266514	0.422395	-6.30409	0.164299	0.272286
Q9VZZ4	Q9VZZ4	Pxn	FALSE	0	-4.51823	-5.13789	-3.89858	23.9436	-18.4584	5.42742e-06	0.00185023	4.89644	0.000719684	0.24478
Q9W002	Q9W002	msn	FALSE	0	-0.00571079	-0.726383	0.714961	25.7631	-0.0200601	0.984733	0.991586	-7.1031	0.385697	0.284684
Q9W020	Q9W020	CG9004	FALSE	0	-0.413287	-1.12866	0.302088	23.2554	-1.46249	0.200554	0.350485	-6.04383	0.136328	0.282591
Q9W061	Q9W061	mu2	FALSE	0	-0.468997	-1.12314	0.185143	23.6512	-1.81499	0.126242	0.264359	-5.59408	0.102828	0.258402
Q9W062	Q9W062	Mfap1	TRUE	3	-1.09336	-2.15198	-0.0347414	21.2658	-2.61456	0.0450647	0.14422	-4.52292	0.0560971	0.418182
Q9W0A8	Q9W0A8	RpL23A	FALSE	0	1.15913	0.541962	1.7763	26.7611	4.75447	0.00443336	0.0424839	-1.96928	0.016525	0.243798
Q9W0B8	Q9W0B8	alphaCOP	FALSE	0	-0.737955	-1.35676	-0.119153	26.249	-3.01893	0.0275557	0.109541	-3.99128	0.0426083	0.244442
Q9W0D6	Q9W0D6	CG7879	TRUE	2	0.299578	-0.56145	1.16061	21.8085	0.880779	0.416791	0.569497	-6.67587	0.221517	0.340128
Q9W0H8	Q9W0H8	scf	TRUE	1	3.79893	2.46101	5.13686	23.4073	7.18796	0.000648993	0.0148782	0.160259	0.00578719	0.528513
Q9W0L7	Q9W0L7	Usp10	FALSE	0	-0.0177867	-0.952555	0.916981	22.6692	-0.0481688	0.963354	0.976856	-7.10197	0.379968	0.369257
Q9W0M4	Q9W0M4	CG13887	FALSE	0	0.352464	-0.325349	1.03028	24.0682	1.31638	0.242394	0.398573	-6.21893	0.155033	0.267753
Q9W0M7	Q9W0M7	Sf3b3	FALSE	0	-0.373986	-0.967179	0.219207	25.5981	-1.596	0.168389	0.31603	-5.87724	0.122926	0.234326
Q9W0P3	Q9W0P3	MED30	TRUE	1	0.308692	-0.462145	1.07953	22.3348	1.01377	0.354954	0.508533	-6.54887	0.197804	0.3045
Q9W0P8	Q9W0P8	MED14	FALSE	0	-0.397072	-1.64218	0.848034	22.4245	-0.807305	0.454372	0.603743	-6.74037	0.234838	0.491849
Q9W0R0	Q9W0R0	Cdc5	FALSE	0	0.0809534	-0.514956	0.676863	27.6437	0.343898	0.744223	0.828377	-7.03423	0.322214	0.2354
Q9W0R7	Q9W0R7	Atac3	FALSE	0	-0.0898472	-0.731639	0.551944	22.5968	-0.354393	0.736787	0.823903	-7.03	0.320474	0.253524
Q9W0S7	Q9W0S7	Tudor-SN	FALSE	0	0.0414255	-1.09183	1.17468	24.2034	0.0925369	0.929687	0.95816	-7.09828	0.372696	0.447665
Q9W0T7	Q9W0T7	Dis3l2	TRUE	1	-0.723954	-1.78081	0.332902	21.8685	-1.73408	0.140426	0.283398	-5.69986	0.110233	0.417485
Q9W102	Q9W102	Orc4	FALSE	0	-0.736681	-1.8462	0.372838	22.0275	-1.68081	0.150624	0.298039	-5.76881	0.115928	0.438288
Q9W108	Q9W108	CG3594	TRUE	4	0.283323	-1.4301	1.99675	21.5997	0.418592	0.69203	0.794106	-7.00149	0.308883	0.676847
Q9W124	Q9W124	CG4806	FALSE	0	0.4646	-0.491358	1.42056	26.1736	1.23031	0.270654	0.427085	-6.31775	0.166123	0.377628
Q9W135	Q9W135	CG42360	TRUE	1	-0.248669	-0.899426	0.402089	22.3765	-0.967334	0.375647	0.527729	-6.59463	0.205271	0.257066
Q9W137	Q9W137	CG4707	FALSE	0	-0.198005	-1.43054	1.03453	22.0456	-0.406678	0.700237	0.799088	-7.00712	0.310821	0.486883
Q9W140	Q9W140	CG3548	FALSE	0	1.0733	0.382663	1.76394	25.5797	3.93411	0.0099356	0.0633479	-2.86766	0.0246405	0.27282
Q9W141	Q9W141	ATPsynF	TRUE	3	1.81356	1.04512	2.582	22.4012	5.97443	0.00156772	0.0252054	-0.812236	0.00980416	0.303554
Q9W198	Q9W198	ocm	FALSE	0	-0.716145	-1.34792	-0.0843676	22.764	-2.86954	0.0329546	0.119512	-4.1857	0.0464867	0.249568
Q9W199	Q9W199	mRpS17	TRUE	4	-0.0451009	-1.15573	1.06553	21.4261	-0.102799	0.921921	0.95353	-7.0971	0.370895	0.438729
Q9W1A9	Q9W1A9	enok	FALSE	0	-0.0720899	-0.775684	0.631504	25.3211	-0.259374	0.805176	0.877805	-7.06384	0.34144	0.277938
Q9W1B9	Q9W1B9	RpL12	FALSE	0	0.50697	-0.522313	1.53625	24.5067	1.24687	0.264996	0.421372	-6.29901	0.163901	0.406593
Q9W1C5	Q9W1C5	IntS1	FALSE	0	-0.805231	-1.54987	-0.0605963	25.2421	-2.73749	0.0387083	0.133359	-4.35958	0.0518727	0.29415
Q9W1C8	Q9W1C8	CG3163	FALSE	0	0.988801	0.349989	1.62761	25.7944	3.91842	0.0100998	0.0635407	-2.88585	0.0247154	0.252347
Q9W1F4	Q9W1F4	thoc5	FALSE	0	0.0511552	-0.659317	0.761628	24.3862	0.182271	0.862176	0.910193	-7.08377	0.354038	0.280655
Q9W1F7	Q9W1F7	Stoml2	FALSE	0	0.26886	-0.984662	1.52238	23.2853	0.542961	0.609328	0.731092	-6.93386	0.284373	0.495174
Q9W1G1	Q9W1G1	CG3735	FALSE	0	0.606215	-0.272667	1.4851	26.3675	1.74611	0.138221	0.280513	-5.68422	0.109111	0.347181
Q9W1G7	Q9W1G7	Nap1	FALSE	0	1.45515	0.561006	2.34929	24.564	4.11979	0.00820683	0.0580688	-2.65524	0.022587	0.35321
Q9W1H5	Q9W1H5	DCP1	TRUE	4	-0.625595	-1.24922	-0.0019679	21.5066	-2.53947	0.0495009	0.151207	-4.62326	0.0588152	0.246349
Q9W1H8	Q9W1H8	Mtpbeta	FALSE	0	-0.686298	-1.56361	0.191017	23.7994	-1.9803	0.101606	0.234862	-5.37489	0.0913545	0.346562
Q9W1I0	Q9W1I0	TBPH	TRUE	4	-0.476722	-1.42845	0.475001	21.453	-1.26803	0.257922	0.414548	-6.27488	0.161247	0.375955
Q9W1I6	Q9W1I6	ytr	FALSE	0	-0.133964	-1.35237	1.08444	22.9391	-0.278337	0.791346	0.868141	-7.05789	0.337681	0.481302
Q9W1I8	Q9W1I8	Snap29	TRUE	3	0.980291	0.0425968	1.91799	21.8319	2.64648	0.0433114	0.142112	-4.48038	0.0552775	0.370413
Q9W1M9	Q9W1M9	Rrp4	TRUE	2	0.450576	-0.3267	1.22785	22.2317	1.46746	0.199256	0.349907	-6.03773	0.136104	0.307044
Q9W1N3	Q9W1N3	levy	TRUE	2	0.812947	0.190265	1.43563	21.9263	3.305	0.0197515	0.0895939	-3.62694	0.0348494	0.245975
Q9W1R5	Q9W1R5	vir	FALSE	0	-0.0141056	-0.775019	0.746808	25.654	-0.0469278	0.964298	0.977128	-7.10204	0.380074	0.30058
Q9W1V3	Q9W1V3	Fib	FALSE	0	0.421689	-0.180739	1.02412	29.8731	1.77199	0.133591	0.274394	-5.65044	0.106731	0.237975
Q9W1X4	Q9W1X4	Nup214	FALSE	0	0.0829991	-0.532919	0.698917	26.2499	0.341134	0.746186	0.829924	-7.03532	0.322816	0.243304
Q9W1X7	Q9W1X7	MED23	TRUE	2	-0.139043	-0.944926	0.66684	21.4443	-0.43677	0.679598	0.789228	-6.99261	0.306986	0.318344
Q9W1X9	Q9W1X9	asrij	TRUE	3	-0.579265	-1.31714	0.158614	21.4477	-1.98732	0.100677	0.23459	-5.36553	0.0912484	0.291481
Q9W1Y1	Q9W1Y1	EMC8-9	TRUE	4	-0.734585	-1.65431	0.185143	21.3968	-2.02189	0.0962247	0.228258	-5.31929	0.0887854	0.363316
Q9W229	Q9W229	RpS24	FALSE	0	-1.23824	-2.58805	0.111582	24.4867	-2.32222	0.0652106	0.180076	-4.91524	0.0700442	0.533213
Q9W246	Q9W246	CG4554	FALSE	0	-0.767668	-1.42828	-0.107051	27.5746	-2.9417	0.0302133	0.116244	-4.09146	0.0452155	0.260961
Q9W254	Q9W254	qkr58E-2	TRUE	1	0.69678	-0.431833	1.82539	22.7312	1.56288	0.17587	0.325777	-5.91907	0.126718	0.445831
Q9W2D9	Q9W2D9	eIF3k	TRUE	1	-0.105325	-0.758504	0.547854	21.425	-0.408202	0.699185	0.799088	-7.00641	0.310821	0.258022
Q9W2E3	Q9W2E3	NC2alpha	TRUE	3	-0.100738	-0.836858	0.635382	22.0152	-0.346434	0.742423	0.827647	-7.03322	0.32193	0.290786
Q9W2E7	Q9W2E7	Rae1	FALSE	0	-0.190945	-0.983218	0.601327	25.7469	-0.610112	0.56714	0.694291	-6.89084	0.270059	0.312968
Q9W2G5	Q9W2G5	TAF1C-like	TRUE	4	0.86603	-0.822335	2.5544	21.7185	1.2985	0.248034	0.40502	-6.23974	0.157541	0.666948
Q9W2I4	Q9W2I4	Sgf29	TRUE	3	0.622519	-0.136783	1.38182	21.5058	2.07545	0.0897255	0.217112	-5.24747	0.08445	0.299944
Q9W2K3	Q9W2K3	hng1	TRUE	1	2.53971	0.910219	4.1692	23.5207	3.94554	0.00981781	0.0633479	-2.85442	0.0246405	0.643691
Q9W2K4	Q9W2K4	CG4266	FALSE	0	0.184978	-0.408916	0.778873	24.0251	0.788472	0.464397	0.613683	-6.7562	0.238704	0.234604
Q9W2N6	Q9W2N6	CG9346	FALSE	0	0.944378	0.282105	1.60665	23.1087	3.6098	0.0140497	0.0724887	-3.25153	0.028196	0.261615
Q9W335	Q9W335	l(1)G0320	TRUE	1	0.425762	-1.05047	1.90199	21.6505	0.730107	0.496478	0.64086	-6.80337	0.249275	0.58315
Q9W351	Q9W351	Aladin	FALSE	0	-0.305205	-0.921508	0.311098	24.6073	-1.25364	0.262715	0.419127	-6.29132	0.163028	0.243455
Q9W363	Q9W363	mxc	FALSE	0	-0.30716	-1.24791	0.633586	25.7725	-0.826545	0.444295	0.594172	-6.72389	0.231115	0.371619
Q9W384	Q9W384	Bap111	FALSE	0	1.98161	1.2903	2.67292	25.1697	7.25639	0.000619836	0.0148782	0.210555	0.00578719	0.273085
Q9W392	Q9W392	CCT2	FALSE	0	-0.436968	-1.03789	0.163952	23.1459	-1.84081	0.122027	0.260048	-5.56009	0.101151	0.237379
Q9W396	Q9W396	HP1b	TRUE	4	0.164249	-1.03921	1.3677	21.4024	0.345499	0.743086	0.827749	-7.03359	0.32197	0.475396
Q9W397	Q9W397	CG7246	FALSE	0	-0.919308	-1.58273	-0.255881	25.3415	-3.50786	0.0157194	0.0781646	-3.37554	0.0304037	0.262071
Q9W3B2	Q9W3B2	Rbm13	FALSE	0	1.63548	0.429014	2.84195	25.5014	3.43167	0.017114	0.0824901	-3.46926	0.0320862	0.476585
Q9W3C0	Q9W3C0	CG1789	TRUE	1	1.08781	0.0194713	2.15615	22.4507	2.57762	0.0471906	0.147483	-4.57223	0.0573667	0.422022
Q9W3C1	Q9W3C1	l(1)G0020	FALSE	0	0.191866	-0.477105	0.860838	27.6407	0.726049	0.498765	0.642665	-6.80654	0.249978	0.264261
Q9W3C2	Q9W3C2	CG1785	FALSE	0	0.412341	-0.264691	1.08937	26.0901	1.54178	0.180803	0.330748	-5.94556	0.128651	0.267445
Q9W3D1	Q9W3D1	Caf1-180	FALSE	0	-0.0365909	-0.6326	0.559418	25.1413	-0.155416	0.882273	0.927797	-7.0891	0.360885	0.235439
Q9W3E0	Q9W3E0	CG12112	FALSE	0	0.721346	-0.00259201	1.44528	22.7475	2.52242	0.0505729	0.153737	-4.6461	0.0597993	0.285974
Q9W3E1	Q9W3E1	IntS4	FALSE	0	-0.167313	-0.767461	0.432836	22.8681	-0.70574	0.510321	0.651751	-6.82219	0.253512	0.237074
Q9W3K3	Q9W3K3	CG2260	FALSE	0	-0.232327	-1.06942	0.604761	25.3713	-0.702593	0.512128	0.652993	-6.82458	0.253995	0.330671
Q9W3K4	Q9W3K4	CG1575	FALSE	0	-0.268516	-0.923101	0.386069	23.6988	-1.03843	0.344347	0.497741	-6.52397	0.193606	0.258578
Q9W3M4	Q9W3M4	l(1)G0193	FALSE	0	-0.886551	-1.52228	-0.250822	22.8675	-3.53026	0.0153342	0.0770438	-3.34817	0.0299677	0.251129
Q9W3M7	Q9W3M7	mahe	TRUE	2	1.94161	0.454645	3.42858	23.3339	3.30549	0.0197404	0.0895939	-3.62632	0.0348494	0.587389
Q9W3N1	Q9W3N1	spidey	TRUE	2	-0.162591	-0.849115	0.523934	21.7751	-0.599536	0.573663	0.700389	-6.89791	0.272431	0.271195
Q9W3S4	Q9W3S4	CG4617	TRUE	4	-0.138764	-0.849125	0.571597	21.2787	-0.494508	0.640874	0.758254	-6.96211	0.294938	0.280611
Q9W3W6	Q9W3W6	sov	FALSE	0	-0.497913	-1.09254	0.0967101	24.4679	-2.11976	0.0846957	0.210937	-5.18794	0.0820484	0.234891
Q9W3X7	Q9W3X7	ND-ASHI	TRUE	4	-0.523409	-1.61163	0.564814	21.522	-1.21758	0.275077	0.431064	-6.33207	0.167671	0.429876
Q9W3Y0	Q9W3Y0	CG3224	TRUE	3	1.79737	1.19738	2.39736	22.6213	7.58352	0.000500018	0.0133815	0.444958	0.00520502	0.23701
Q9W410	Q9W410	CG3815	FALSE	0	0.545876	-0.0773372	1.16909	23.7709	2.21734	0.0746323	0.194232	-5.05657	0.0755504	0.246185
Q9W414	Q9W414	Rpt4	TRUE	2	-0.225819	-0.988708	0.53707	21.5565	-0.749331	0.485743	0.63151	-6.78815	0.245638	0.301361
Q9W423	Q9W423	schlank	TRUE	1	-1.24641	-1.88833	-0.604489	22.3233	-4.91535	0.0038259	0.0384449	-1.80499	0.0149539	0.253575
Q9W424	Q9W424	Spx	TRUE	3	1.91389	0.840434	2.98734	22.7017	4.51344	0.00556437	0.0485039	-2.22257	0.0188666	0.424041
Q9W464	Q9W464	GAA1	TRUE	3	-0.92856	-1.57808	-0.279039	20.8487	-3.61903	0.0139088	0.0724887	-3.24039	0.028196	0.256577
Q9W485	Q9W485	IntS6	FALSE	0	-0.652839	-1.4007	0.0950167	23.8225	-2.20985	0.075358	0.194769	-5.06666	0.0757593	0.295422
Q9W499	Q9W499	RpL35	TRUE	1	0.941696	-1.05387	2.93726	24.4352	1.19459	0.283226	0.438319	-6.3577	0.170493	0.7883
Q9W4B2	Q9W4B2	Vsx1	TRUE	2	0.3701	-0.617187	1.35739	21.8224	0.948966	0.384097	0.537513	-6.61232	0.209076	0.390004
Q9W4C1	Q9W4C1	CG15784	FALSE	0	-0.718158	-1.36993	-0.0663817	24.29	-2.78931	0.0363284	0.127281	-4.29114	0.0495086	0.257468
Q9W4H8	Q9W4H8	Pp2C1	TRUE	2	0.0789592	-1.21768	1.3756	22.2667	0.154155	0.883218	0.928117	-7.08933	0.36101	0.512205
Q9W4J5	Q9W4J5	CG3527	FALSE	0	-0.101503	-1.09711	0.894109	23.9174	-0.258085	0.806119	0.877805	-7.06423	0.34144	0.393292
Q9W4R1	Q9W4R1	CG2875	FALSE	0	0.0887827	-0.725401	0.902966	25.0694	0.276046	0.793013	0.869311	-7.05863	0.338136	0.321623
Q9W4W7	Q9W4W7	CG2662	TRUE	1	-0.162587	-1.13296	0.807787	22.3118	-0.424151	0.688216	0.790984	-6.99881	0.307669	0.383323
Q9W4X7	Q9W4X7	eIF3g1	TRUE	1	0.542839	-0.577054	1.66273	22.9459	1.22707	0.271774	0.427454	-6.32141	0.166267	0.442386
Q9W4Y6	Q9W4Y6	boi	FALSE	0	-0.0225233	-0.620178	0.575131	23.6061	-0.0954016	0.927518	0.956606	-7.09797	0.372091	0.236089
Q9W4Z9	Q9W4Z9	CG3071	FALSE	0	0.853825	0.0834741	1.62417	27.3139	2.80579	0.0356054	0.125661	-4.26942	0.0488784	0.304308
Q9W526	Q9W526	CG16903	FALSE	0	0.644748	-0.233405	1.5229	23.5144	1.85864	0.119199	0.255526	-5.53655	0.0993922	0.346893
Q9W542	Q9W542	mip130	FALSE	0	1.66134	0.672306	2.65038	26.5032	4.25228	0.00718285	0.0544167	-2.50696	0.0211665	0.390695
Q9W543	Q9W543	Rbcn-3B	TRUE	3	3.52924	2.79332	4.26517	23.3121	12.1401	4.72087e-05	0.00393649	2.91629	0.00153118	0.290709
Q9W550	Q9W550	CG14805	FALSE	0	0.776603	-0.295796	1.849	26.3262	1.83323	0.123248	0.261496	-5.57007	0.101714	0.423625
Q9W5D3	Q9W5D3	CG16989	TRUE	3	0.133914	-1.18032	1.44815	22.8349	0.257945	0.806222	0.877805	-7.06427	0.34144	0.519158
Q9W5E2	Q9W5E2	CG13367	TRUE	4	0.279137	-1.02093	1.5792	21.7009	0.543535	0.60896	0.731092	-6.93351	0.284373	0.513558
Q9W5E4	Q9W5E4	Mybbp1A	FALSE	0	0.127176	-1.13041	1.38476	27.5257	0.256001	0.807645	0.878693	-7.06485	0.341786	0.496779
Q9XTL2	Q9XTL2	Stam	TRUE	2	0.594831	-0.39617	1.58583	22.2841	1.51948	0.186161	0.335461	-5.9734	0.130484	0.391471
Q9XTM1	Q9XTM1	Sec10	TRUE	2	-0.837404	-2.00188	0.327072	21.4	-1.82045	0.125338	0.263577	-5.58689	0.102524	0.459998
Q9XYZ4	Q9XYZ4	mre11	FALSE	0	0.0429284	-0.683811	0.769668	22.8267	0.149534	0.886688	0.928486	-7.09015	0.361153	0.287081
Q9XYZ5	Q9XYZ5	pic	FALSE	0	-0.0280986	-0.704705	0.648507	23.6632	-0.105129	0.920158	0.95353	-7.09682	0.370895	0.267277
Q9XYZ6	Q9XYZ6	CG5808	FALSE	0	0.497701	-0.213805	1.20921	23.5815	1.77078	0.133804	0.274394	-5.65203	0.106731	0.281063
Q9XZ03	Q9XZ03	mbf1	TRUE	1	0.998431	-0.336693	2.33355	21.2778	1.89309	0.113922	0.249387	-5.49095	0.0970042	0.527408
Q9XZ06	Q9XZ06	Nup93-1	FALSE	0	-0.556649	-1.25815	0.144854	27.4424	-2.00875	0.097892	0.2307	-5.33687	0.0897354	0.277111
Q9XZ19	Q9XZ19	CG3909	TRUE	2	-0.714481	-2.90838	1.47942	21.6246	-0.82442	0.4454	0.594479	-6.72573	0.231235	0.866647
Q9XZ21	Q9XZ21	snama	FALSE	0	1.11812	0.402069	1.83417	26.633	3.95293	0.00974259	0.0633479	-2.84587	0.0246405	0.282858
Q9XZ34	Q9XZ34	Rif1	FALSE	0	-0.31573	-0.985545	0.354084	26.9681	-1.19326	0.283703	0.438589	-6.35917	0.170598	0.264594
Q9XZ53	Q9XZ53	Stt3B	FALSE	0	-0.74424	-1.65056	0.162077	23.4799	-2.07878	0.0893376	0.216719	-5.24301	0.0842971	0.358018
Q9XZ57	Q9XZ57	Eb1	FALSE	0	3.38776	2.19072	4.5848	24.3223	7.16438	0.000659413	0.0148782	0.142819	0.00578719	0.472861
Q9XZ61	Q9XZ61	Uch-L5	TRUE	2	0.129746	-0.500103	0.759595	21.7904	0.521475	0.623206	0.743429	-6.94668	0.289172	0.248806
Q9XZT7	Q9XZT7	Taf10b	TRUE	3	0.88124	-0.237663	2.00014	22.2865	1.99378	0.0998295	0.232989	-5.35689	0.0906259	0.441995
Q9Y091	Q9Y091	fl(2)d	FALSE	0	2.03631	1.07158	3.00103	26.5196	5.34335	0.0026264	0.03408	-1.38581	0.0132561	0.381092
Q9Y095	Q9Y095	XRCC1	FALSE	0	0.108245	-0.584761	0.801251	23.3754	0.395409	0.708043	0.806089	-7.0123	0.313545	0.273755
Q9Y0I1	Q9Y0I1	MRG15	FALSE	0	1.86048	1.23725	2.48371	23.1027	7.55707	0.000508628	0.0133815	0.426369	0.00520502	0.24619
Q9Y0Z1	Q9Y0Z1	CG11970	TRUE	1	-0.391821	-1.04788	0.264235	22.0803	-1.51189	0.188018	0.337127	-5.98284	0.131132	0.259159
Q9Y105	Q9Y105	GlnRS	FALSE	0	-0.745131	-1.37587	-0.114392	24.357	-2.9906	0.0284994	0.110857	-4.02795	0.0431199	0.249158
Q9Y113	Q9Y113	NELF-B	TRUE	4	0.527275	-1.52727	2.58182	21.5757	0.649675	0.543157	0.674634	-6.86347	0.262412	0.811599
Q9Y134	Q9Y134	Mtr4	FALSE	0	-0.492809	-1.19738	0.211762	25.5061	-1.77063	0.13383	0.274394	-5.65222	0.106731	0.278324
Q9Y154	Q9Y154	cindr	TRUE	1	0.0719	-0.595174	0.738974	22.2765	0.272854	0.795337	0.870539	-7.05966	0.338614	0.263511
Q9Y166	Q9Y166	Dic1	TRUE	4	-0.883432	-1.91596	0.149099	20.9599	-2.16593	0.079767	0.202142	-5.12582	0.078627	0.407876
Q9Y171	Q9Y171	OXA1L	TRUE	4	0.494864	-1.368	2.35773	21.5961	0.67248	0.529636	0.664686	-6.84702	0.258543	0.735879
R9PY73	R9PY73	wcy	TRUE	2	-0.0612393	-1.14248	1.02001	21.679	-0.143377	0.891314	0.930543	-7.09122	0.361953	0.42712
R9Q794	R9Q794	RpL5	FALSE	0	0.0125714	-0.580491	0.605633	27.0761	0.053661	0.959181	0.973989	-7.10164	0.378853	0.234275
T2GGJ9	T2GGJ9	CG6379	TRUE	4	-0.231304	-1.55788	1.09527	21.4447	-0.441392	0.676454	0.78684	-6.9903	0.306057	0.524032
X2J5G6	X2J5G6	RpL7	FALSE	0	-0.237887	-0.900211	0.424437	28.1045	-0.909233	0.402894	0.554576	-6.64977	0.215713	0.261635
X2J5P0	X2J5P0	cana	TRUE	3	4.21543	3.21008	5.22077	23.0939	10.6145	9.35225e-05	0.00541308	2.22512	0.00210553	0.397137
X2J6S0	X2J6S0	msl-1	FALSE	0	0.282339	-0.313443	0.878121	23.5829	1.19966	0.281411	0.435977	-6.35207	0.169582	0.235349
X2J8R0	X2J8R0	sip1	TRUE	1	0.293903	-0.332953	0.920758	22.3079	1.18689	0.286003	0.439794	-6.36622	0.171067	0.247624
X2J950	X2J950	RpS13	FALSE	0	1.12662	0.362117	1.89113	25.1725	3.73054	0.0123259	0.070219	-3.10671	0.0273131	0.302
X2J969	X2J969	MED19	TRUE	3	1.41618	0.728953	2.10341	22.2726	5.21665	0.00292895	0.0344153	-1.50725	0.0133865	0.271474
X2J9A4	X2J9A4	Trp1	FALSE	0	0.25236	-0.374053	0.878773	23.8326	1.01985	0.352315	0.505253	-6.54277	0.196528	0.247449
X2J9B3	X2J9B3	E2f2	FALSE	0	2.62274	1.78844	3.45704	24.044	7.95804	0.000394751	0.0119001	0.701588	0.00462878	0.329571
X2J9F3	X2J9F3	Nup160	FALSE	0	-1.25222	-1.92943	-0.575012	27.1427	-4.68093	0.00474768	0.0443219	-2.04565	0.0172399	0.267516
X2J9M9	X2J9M9	CG31729	TRUE	3	-0.487312	-1.23386	0.259241	21.3787	-1.65242	0.156355	0.30273	-5.80531	0.117753	0.294907
X2J9X1	X2J9X1	Hnf4	TRUE	1	0.688626	-0.287764	1.66502	22.4461	1.7854	0.131255	0.271324	-5.6329	0.105537	0.385699
X2JA11	X2JA11	CG5254	TRUE	4	0.123237	-0.609097	0.855572	21.7717	0.425998	0.686952	0.790787	-6.99792	0.307593	0.289291
X2JA36	X2JA36	YL-1	TRUE	1	3.07085	1.58838	4.55333	23.4814	5.24382	0.00286081	0.0342115	-1.48103	0.0133073	0.585614
X2JA43	X2JA43	Ns3	FALSE	0	-0.637262	-1.58607	0.311546	22.0818	-1.70026	0.146819	0.292225	-5.74372	0.113667	0.374804
X2JAA8	X2JAA8	wapl	TRUE	1	0.00118411	-0.647458	0.649827	22.674	0.00462127	0.996483	0.996483	-7.10333	0.387602	0.25623
X2JAF1	X2JAF1	lva	FALSE	0	0.520497	-0.375568	1.41656	26.5437	1.47046	0.198479	0.348966	-6.03405	0.135737	0.353969
X2JB48	X2JB48	sesB	FALSE	0	-0.967483	-1.62248	-0.312489	30.7011	-3.73922	0.0122116	0.070174	-3.09639	0.0272956	0.25874
X2JBC1	X2JBC1	Upf1	FALSE	0	0.7672	-0.0673674	1.60177	25.3895	2.32714	0.064801	0.179507	-4.90861	0.069823	0.329676
X2JC02	X2JC02	Svil	TRUE	4	-0.547439	-1.16618	0.0713049	20.9085	-2.23975	0.0725042	0.192712	-5.02637	0.0749592	0.24442
X2JC31	X2JC31	Chc	FALSE	0	-0.835119	-1.51804	-0.152196	26.5421	-3.09565	0.0251702	0.105064	-3.89251	0.0408667	0.269772
X2JC35	X2JC35	RpL36	FALSE	0	2.15693	1.2213	3.09255	24.7416	5.83591	0.00174924	0.0269272	-0.933824	0.0104739	0.369596
X2JC79	X2JC79	eIF4H1	FALSE	0	1.15372	0.5405	1.76693	25.7631	4.76278	0.00439938	0.0424394	-1.96071	0.0165077	0.242236
X2JC94	X2JC94	Pgam5	FALSE	0	-0.262807	-1.04735	0.521733	23.4375	-0.848001	0.433255	0.58536	-6.70517	0.227687	0.309914
X2JCE0	X2JCE0	kz	FALSE	0	0.409759	-0.352199	1.17172	25.992	1.36136	0.22872	0.382053	-6.16594	0.148607	0.300993
X2JCP8	X2JCP8	Act5C	FALSE	0	-0.335785	-0.938489	0.266918	28.927	-1.41037	0.214636	0.365956	-6.10725	0.142346	0.238083
X2JCS6	X2JCS6	RpL7A	FALSE	0	0.0165598	-0.720626	0.753745	26.8888	0.0568659	0.956746	0.972882	-7.10143	0.378422	0.291207
X2JCX8	X2JCX8	RpS14a	FALSE	0	-0.140914	-0.817116	0.535289	26.0024	-0.527535	0.619274	0.739958	-6.94311	0.287822	0.267117
X2JD11	X2JD11	CG7692	TRUE	3	-0.578014	-1.43577	0.279746	21.1913	-1.70588	0.145738	0.290872	-5.73645	0.113141	0.338837
X2JDU0	X2JDU0	RpL9	FALSE	0	-0.323175	-1.01241	0.366056	25.1602	-1.18699	0.285967	0.439794	-6.36611	0.171067	0.272264
X2JE06	X2JE06	RpL24	FALSE	0	0.44688	-0.463325	1.35709	25.6696	1.24287	0.266353	0.422395	-6.30355	0.164299	0.359554
X2JE07	X2JE07	CG1677	FALSE	0	-0.049712	-0.666955	0.567531	25.0443	-0.203882	0.846087	0.903533	-7.07887	0.351447	0.243827
X2JEM4	X2JEM4	RpS28b	TRUE	1	0.217391	-2.27619	2.71098	23.5453	0.220695	0.833628	0.894188	-7.07469	0.347812	0.98503
X2JEU3	X2JEU3	CG1737	FALSE	0	0.910215	0.283093	1.53734	26.0621	3.67423	0.0130981	0.071454	-3.17397	0.0277935	0.247729
X2JEW2	X2JEW2	CG2691	FALSE	0	-0.171919	-0.891162	0.547324	27.2556	-0.605093	0.57023	0.697207	-6.89421	0.271193	0.284119
X2JF59	X2JF59	Jafrac1	FALSE	0	1.35326	0.571418	2.13509	26.4536	4.38165	0.00632184	0.051682	-2.36477	0.0201027	0.308846
X2JFD6	X2JFD6	Mfe2	TRUE	4	-0.512898	-1.52958	0.503779	21.5386	-1.27709	0.254943	0.412182	-6.26447	0.160327	0.401613
X2JFM3	X2JFM3	mnb	TRUE	3	-0.626443	-1.36306	0.110175	21.4372	-2.15285	0.081132	0.204526	-5.14343	0.0795546	0.290983
X2JFR1	X2JFR1	nonA	FALSE	0	0.00151594	-0.612797	0.615829	26.796	0.00624695	0.995245	0.996483	-7.10332	0.387602	0.242669
X2JFR6	X2JFR6	eIF2alpha	TRUE	1	-0.217664	-1.20832	0.772989	22.3747	-0.556212	0.600859	0.72514	-6.92572	0.282058	0.391333
X2JFW6	X2JFW6	CG8289	FALSE	0	0.899057	0.294826	1.50329	25.8273	3.76668	0.0118576	0.0689071	-3.0638	0.0268028	0.238686
X2JG22	X2JG22	CG7028	FALSE	0	-0.246778	-0.888205	0.394649	25.8457	-0.973943	0.372643	0.525038	-6.58821	0.204224	0.25338
X2JG50	X2JG50	Elys	FALSE	0	-0.438564	-1.09979	0.222658	26.8275	-1.67904	0.150976	0.298039	-5.7711	0.115928	0.261199
X2JGB3	X2JGB3	Bre1	FALSE	0	0.38749	-0.363351	1.13833	23.4871	1.30643	0.245516	0.402791	-6.23052	0.156674	0.296601
X2JGM9	X2JGM9	RpS4	FALSE	0	-0.270692	-0.876397	0.335013	26.5786	-1.13133	0.306756	0.459499	-6.42677	0.178731	0.239269
X2JGP4	X2JGP4	Pdi	FALSE	0	-1.17867	-2.14336	-0.213973	23.417	-3.09298	0.0252493	0.105064	-3.89593	0.0408667	0.381078
X2JH42	X2JH42	ATPsynbeta	FALSE	0	-0.217871	-1.04874	0.613	24.9527	-0.663805	0.534753	0.668401	-6.85334	0.259988	0.328216
X2JIQ5	X2JIQ5	RpL17	FALSE	0	0.507066	-0.203047	1.21718	24.2343	1.80764	0.127468	0.265773	-5.60373	0.103378	0.280513
X2JKF2	X2JKF2	CG9213	TRUE	3	0.654042	0.0451388	1.26295	21.3673	2.71914	0.0395912	0.135434	-4.38387	0.0526796	0.240532
X2JKU5	X2JKU5	RpS5a	FALSE	0	-0.128688	-0.789382	0.532006	23.7792	-0.493074	0.641821	0.758754	-6.96291	0.295133	0.260991
