# Supplementary material for: The role of RNA in the maintenance of chromatin domains as revealed by antibody-mediated proximity labelling coupled to mass spectrometry
Source: eLife. 2024 May 8;13:e95718. doi: 10.7554/eLife.95718 (PMC11147508; doi:10.7554/eLife.95718)
Supplement: Supplementary file 2. [file elife-95718-supp2.xlsx]

## Sheet: Exp_Exp_vs_AB_Ctl
ID	Description	GeneRatio	BgRatio	pvalue	p.adjust	qvalue	geneID	Count
GO:0022613	ribonucleoprotein complex biogenesis	43/260	413/18885	1.90569e-25	1.76085e-22	1.62886e-22	RpS16/CG9667/hoip/RpS19a/tra2/bys/RpS15/CG5033/l(2)k09848/CG4038/Ns1/Rrp45/Mpp6/Sas10/CG7637/CG11563/CG1542/CG11920/CG7006/ppan/snRNP-U1-C/Rpb4/CG3817/RpL24-like/RpL7-like/CG6686/CG13097/SmE/CG9107/CG11030/mbm/Sf3b1/SmD1/CG6833/CG12301/RpL26/CG6841/Rrp47/CG16753/RpL23A/Rbm13/CG3071/eIF4H1	43
GO:0042254	ribosome biogenesis	34/260	283/18885	2.97878e-22	1.3762e-19	1.27304e-19	RpS16/hoip/RpS19a/bys/RpS15/CG5033/l(2)k09848/CG4038/Ns1/Rrp45/Mpp6/Sas10/CG7637/CG11563/CG1542/CG11920/CG7006/ppan/CG3817/RpL24-like/RpL7-like/CG6686/CG13097/CG9107/CG11030/mbm/CG6833/CG12301/RpL26/Rrp47/CG16753/RpL23A/Rbm13/CG3071	34
GO:0000380	alternative mRNA splicing, via spliceosome	26/260	234/18885	2.15874e-16	6.64892e-14	6.15052e-14	sqd/qkr58E-1/Hrb98DE/HnRNP-K/Hrb87F/Cpsf6/U2af50/Hakai/U2af38/x16/snRNP-U1-70K/qkr58E-3/tra2/Rbp1/Hel25E/Srrm234/Saf-B/CG14641/SF2/CG4119/PQBP1/snRNP-U1-C/Sf3a1/CG2926/CG6841/fl(2)d	26
GO:0048024	regulation of mRNA splicing, via spliceosome	26/260	240/18885	4.02529e-16	9.29842e-14	8.60141e-14	sqd/qkr58E-1/Hrb98DE/HnRNP-K/Hrb87F/Cpsf6/Pep/U2af50/Hakai/U2af38/x16/snRNP-U1-70K/qkr58E-3/tra2/Rbp1/Hel25E/Saf-B/CG14641/SF2/CG4119/snRNP-U1-C/SF1/Sf3a1/CG2926/CG6841/fl(2)d	26
GO:0043484	regulation of RNA splicing	27/260	266/18885	5.5252e-16	1.02106e-13	9.44518e-14	sqd/qkr58E-1/Hrb98DE/HnRNP-K/Hrb87F/Cpsf6/Pep/U2af50/Hakai/U2af38/x16/snRNP-U1-70K/qkr58E-3/tra2/Rbp1/Hel25E/Saf-B/CG14641/SF2/CG4119/snRNP-U1-C/SF1/Sf3a1/glo/CG2926/CG6841/fl(2)d	27
GO:0050684	regulation of mRNA processing	27/260	268/18885	6.6722e-16	1.02752e-13	9.50496e-14	sqd/qkr58E-1/Hrb98DE/HnRNP-K/Hrb87F/Cpsf6/Pep/U2af50/Hakai/U2af38/x16/snRNP-U1-70K/qkr58E-3/tra2/mle/Rbp1/Hel25E/Saf-B/CG14641/SF2/CG4119/snRNP-U1-C/SF1/Sf3a1/CG2926/CG6841/fl(2)d	27
GO:0006364	rRNA processing	23/260	187/18885	1.33813e-15	1.76633e-13	1.63393e-13	RpS16/bys/CG5033/CG4038/Rrp45/Mpp6/Sas10/CG7637/CG1542/CG11920/ppan/CG3817/RpL7-like/CG6686/CG13097/CG9107/CG11030/CG6833/CG12301/Rrp47/CG16753/Rbm13/CG3071	23
GO:0016072	rRNA metabolic process	24/260	212/18885	2.11662e-15	2.4447e-13	2.26145e-13	RpS16/bys/CG5033/CG4038/Rrp45/Mpp6/Sas10/CG7637/CG1542/CG11920/ppan/CG3817/RpL7-like/CG6686/CG13097/CG9107/CG11030/CG6833/CG12301/Mtr3/Rrp47/CG16753/Rbm13/CG3071	24
GO:1903311	regulation of mRNA metabolic process	30/260	362/18885	3.14651e-15	3.23042e-13	2.98826e-13	sqd/qkr58E-1/Hrb98DE/HnRNP-K/Hrb87F/Pabp2/Cpsf6/Pep/U2af50/Hakai/U2af38/x16/snRNP-U1-70K/qkr58E-3/tra2/mle/Rbp1/Hel25E/Saf-B/Rrp45/CG14641/SF2/CG4119/snRNP-U1-C/Rpb4/SF1/Sf3a1/CG2926/CG6841/fl(2)d	30
GO:0000381	regulation of alternative mRNA splicing, via spliceosome	24/260	228/18885	1.10233e-14	1.01855e-12	9.42203e-13	sqd/qkr58E-1/Hrb98DE/HnRNP-K/Hrb87F/Cpsf6/U2af50/Hakai/U2af38/x16/snRNP-U1-70K/qkr58E-3/tra2/Rbp1/Hel25E/Saf-B/CG14641/SF2/CG4119/snRNP-U1-C/Sf3a1/CG2926/CG6841/fl(2)d	24
GO:0034470	ncRNA processing	26/260	355/18885	4.19035e-12	3.51989e-10	3.25604e-10	RpS16/bys/CG5033/CG4038/Rrp45/Mpp6/Sas10/Cbp20/CG7637/Ars2/CG1542/CG11920/ppan/CG3817/RpL7-like/CG6686/CG13097/CG9107/CG11030/CG6833/CG12301/Mtr3/Rrp47/CG16753/Rbm13/CG3071	26
GO:0034660	ncRNA metabolic process	30/260	500/18885	1.36305e-11	1.04955e-09	9.70877e-10	RpS16/Tbp/bys/CG5033/CG4038/Rrp45/Mpp6/Sas10/Cbp20/CG7637/Ars2/CG1542/CG11920/Rpb10/ppan/CG3817/RpL7-like/CG6686/CG13097/CG9107/CG11030/CG3756/Rpb8/CG6833/CG12301/Mtr3/Rrp47/CG16753/Rbm13/CG3071	30
GO:0042273	ribosomal large subunit biogenesis	13/260	72/18885	1.62936e-11	1.1581e-09	1.07129e-09	CG5033/l(2)k09848/Ns1/CG11563/CG1542/CG7006/ppan/CG3817/RpL24-like/RpL7-like/RpL26/RpL23A/Rbm13	13
GO:0002181	cytoplasmic translation	19/260	212/18885	1.19885e-10	7.9124e-09	7.31929e-09	RpS16/RpS19a/RpS3/RpS17/mle/RpS25/RpS3A/RpS15/lark/larp/RpL24-like/RpL7-like/RpL26/RpS10b/RpL28/RpL23A/RpS13/RpL36/eIF4H1	19
GO:0006325	chromatin organization	28/260	496/18885	2.78619e-10	1.71629e-08	1.58764e-08	Nlp/Act87E/XNP/psq/Caf1-105/CG18004/Spt6/mof/Su(var)205/mle/Pc/Hel25E/Trl/Bap55/CG8878/CG5815/BEAF-32/vig/U2A/cid/Nph/HP1c/NC2beta/scf/Nap1/Bap111/MRG15/YL-1	28
GO:0071824	protein-DNA complex subunit organization	16/260	175/18885	2.72311e-09	1.57259e-07	1.45471e-07	Cenp-C/Act87E/XNP/Caf1-105/Spt6/Su(var)205/Tbp/Trl/Bap55/CG5815/cid/Brf/NC2beta/Nap1/MRG15/YL-1	16
GO:0006338	chromatin remodeling	17/260	229/18885	2.02116e-08	1.09856e-06	1.01621e-06	Nlp/Act87E/XNP/Caf1-105/CG18004/Spt6/Su(var)205/Hel25E/Trl/Bap55/CG5815/Nph/NC2beta/Nap1/Bap111/MRG15/YL-1	17
GO:0022618	ribonucleoprotein complex assembly	14/260	187/18885	3.3208e-07	1.70468e-05	1.57689e-05	CG9667/RpS19a/tra2/RpS15/ppan/snRNP-U1-C/Rpb4/SmE/CG9107/Sf3b1/SmD1/CG6841/RpL23A/eIF4H1	14
GO:0071826	ribonucleoprotein complex subunit organization	14/260	192/18885	4.58078e-07	2.2277e-05	2.06072e-05	CG9667/RpS19a/tra2/RpS15/ppan/snRNP-U1-C/Rpb4/SmE/CG9107/Sf3b1/SmD1/CG6841/RpL23A/eIF4H1	14
GO:0031123	RNA 3'-end processing	11/260	129/18885	1.73197e-06	8.00171e-05	7.4019e-05	Pabp2/Cpsf6/x16/Rbp1/FLASH/Rrp45/SF2/CstF64/Rpb4/Fip1/Mtr3	11
GO:0031124	mRNA 3'-end processing	9/260	83/18885	2.09285e-06	8.78998e-05	8.13108e-05	Pabp2/Cpsf6/x16/Rbp1/FLASH/SF2/CstF64/Rpb4/Fip1	9
GO:0042274	ribosomal small subunit biogenesis	9/260	83/18885	2.09285e-06	8.78998e-05	8.13108e-05	RpS16/RpS19a/RpS15/Sas10/CG9107/CG11030/mbm/CG16753/CG3071	9
GO:0065004	protein-DNA complex assembly	10/260	110/18885	2.88477e-06	0.000115892	0.000107205	Cenp-C/XNP/Caf1-105/Su(var)205/Tbp/CG5815/cid/Brf/NC2beta/Nap1	10
GO:0034728	nucleosome organization	9/260	92/18885	4.96703e-06	0.000191231	0.000176896	Act87E/Caf1-105/Spt6/Trl/Bap55/CG5815/Nap1/MRG15/YL-1	9
GO:0006352	DNA-templated transcription, initiation	10/260	129/18885	1.2036e-05	0.000444849	0.000411503	RpII15/x16/Tbp/Rbp1/caz/SF2/Rpb4/Brf/NC2beta/Taf8	10
GO:0034250	positive regulation of cellular amide metabolic process	11/260	164/18885	1.75045e-05	0.000622082	0.000575451	kay/Hrb98DE/hoip/Spt6/pAbp/lola/lark/larp/PQBP1/Rpb4/pnr	11
GO:0006367	transcription initiation from RNA polymerase II promoter	9/260	109/18885	1.98962e-05	0.000680892	0.000629852	RpII15/x16/Tbp/Rbp1/caz/SF2/Rpb4/NC2beta/Taf8	9
GO:0034248	regulation of cellular amide metabolic process	19/260	459/18885	2.16256e-05	0.000713643	0.000660149	sqd/kay/Hrb98DE/hoip/Pabp2/eIF3b/Spt6/peng/pAbp/mle/lola/Rrp45/lark/larp/PQBP1/eIF3d1/Rpb4/pnr/glo	19
GO:0031497	chromatin assembly	12/260	201/18885	2.34355e-05	0.000746705	0.000690731	XNP/psq/Caf1-105/Su(var)205/mle/Pc/Trl/CG5815/cid/HP1c/Nap1/MRG15	12
GO:0010628	positive regulation of gene expression	17/260	391/18885	3.19726e-05	0.000984757	0.000910939	kay/Hrb98DE/hoip/Hrb87F/Spt6/tra2/pAbp/Dp/lola/lark/larp/PQBP1/Rpb4/pnr/rin/CG6686/MRG15	17
GO:0040029	regulation of gene expression, epigenetic	12/260	220/18885	5.66818e-05	0.00168948	0.00156284	XNP/psq/mof/Su(var)205/mle/Pc/Trl/CG8878/cid/HP1c/scf/MRG15	12
GO:0006417	regulation of translation	15/260	344/18885	9.04206e-05	0.00261089	0.00241518	sqd/Hrb98DE/hoip/Pabp2/eIF3b/peng/pAbp/mle/Rrp45/lark/larp/PQBP1/eIF3d1/Rpb4/glo	15
GO:0045727	positive regulation of translation	7/260	78/18885	9.93654e-05	0.00278223	0.00257368	Hrb98DE/hoip/pAbp/lark/larp/PQBP1/Rpb4	7
GO:0070828	heterochromatin organization	10/260	173/18885	0.000146575	0.00389221	0.00360045	XNP/psq/Su(var)205/mle/Pc/Trl/vig/cid/HP1c/MRG15	10
GO:0010608	post-transcriptional regulation of gene expression	17/260	443/18885	0.000147432	0.00389221	0.00360045	sqd/Hrb98DE/hoip/Pabp2/eIF3b/peng/pAbp/mle/Rrp45/lark/Cbp20/Ars2/larp/PQBP1/eIF3d1/Rpb4/glo	17
GO:2000112	regulation of cellular macromolecule biosynthetic process	15/260	363/18885	0.000163318	0.00419182	0.0038776	sqd/Hrb98DE/hoip/Pabp2/eIF3b/peng/pAbp/mle/Rrp45/lark/larp/PQBP1/eIF3d1/Rpb4/glo	15
GO:0042255	ribosome assembly	6/260	61/18885	0.00018934	0.00472838	0.00437394	RpS19a/RpS15/CG7006/ppan/CG9107/RpL23A	6
GO:0031507	heterochromatin assembly	9/260	166/18885	0.000501041	0.0121832	0.0112699	XNP/psq/Su(var)205/mle/Pc/Trl/cid/HP1c/MRG15	9
GO:0045814	negative regulation of gene expression, epigenetic	9/260	168/18885	0.000546445	0.0129465	0.0119761	XNP/psq/Su(var)205/mle/Pc/Trl/cid/HP1c/MRG15	9
GO:0000956	nuclear-transcribed mRNA catabolic process	7/260	108/18885	0.000739775	0.0170888	0.0158078	sqd/Pabp2/Rat1/LSm3/Rrp45/Rpb4/Mtr3	7
GO:1903313	positive regulation of mRNA metabolic process	6/260	79/18885	0.000771461	0.0173861	0.0160828	Hrb98DE/Hrb87F/Pabp2/tra2/Rrp45/Rpb4	6
GO:0006405	RNA export from nucleus	6/260	81/18885	0.000880409	0.019369	0.0179171	sqd/U2af50/Hel25E/Ref1/SF2/Rpb4	6
GO:0090501	RNA phosphodiester bond hydrolysis	5/260	55/18885	0.000944322	0.0202919	0.0187708	RpII15/Cpsf6/Rrp45/CstF64/Fip1	5
GO:0043486	histone exchange	5/260	57/18885	0.00111155	0.0233425	0.0215927	Act87E/Bap55/CG5815/MRG15/YL-1	5
GO:0030490	maturation of SSU-rRNA	5/260	59/18885	0.00129976	0.0266884	0.0246878	RpS16/Sas10/CG11030/CG16753/CG3071	5
GO:0098813	nuclear chromosome segregation	12/260	313/18885	0.00139109	0.0279428	0.0258482	Cenp-C/prod/mod(mdg4)/cid/bel/RanGAP/BuGZ/RfC3/SA/feo/Eb1/cana	12
GO:0007059	chromosome segregation	13/260	361/18885	0.00156262	0.0304893	0.0282038	Cenp-C/prod/mod(mdg4)/cid/bel/RanGAP/BuGZ/RfC3/SA/feo/Eb1/MRG15/cana	13
GO:0006413	translational initiation	7/260	123/18885	0.00158386	0.0304893	0.0282038	eIF3b/eIF3e/eIF3d1/Rpb4/eIF3f1/eIF3l/eIF4H1	7
GO:0000819	sister chromatid segregation	10/260	244/18885	0.00211605	0.0399026	0.0369115	Cenp-C/prod/cid/bel/BuGZ/RfC3/SA/feo/Eb1/cana	10
GO:0032270	positive regulation of cellular protein metabolic process	14/260	422/18885	0.00224024	0.0413996	0.0382963	Hrb98DE/hoip/Pabp2/Su(var)205/pAbp/Trl/TER94/lark/REG/larp/PQBP1/Rpb4/atms/MRG15	14
GO:0071897	DNA biosynthetic process	5/260	67/18885	0.0022939	0.0415601	0.0384447	mtSSB/Dp/Myb/mip40/mip130	5

## Sheet: AB_Ctl_Exp_vs_AB_Ctl
ID	Description	GeneRatio	BgRatio	pvalue	p.adjust	qvalue	geneID	Count
GO:0006606	protein import into nucleus	8/118	87/18885	7.08072e-08	4.48529e-05	4.147e-05	Nup75/Gp210/Fs(2)Ket/Nup205/Nup154/Nup93-2/Karybeta3/Nup160	8
GO:0051170	import into nucleus	8/118	90/18885	9.24802e-08	4.48529e-05	4.147e-05	Nup75/Gp210/Fs(2)Ket/Nup205/Nup154/Nup93-2/Karybeta3/Nup160	8
GO:0034504	protein localization to nucleus	8/118	105/18885	3.07761e-07	9.95093e-05	9.20043e-05	Nup75/Gp210/Fs(2)Ket/Nup205/Nup154/Nup93-2/Karybeta3/Nup160	8
GO:0017038	protein import	9/118	156/18885	5.89797e-07	0.000143026	0.000132239	Hsc70-5/Nup75/Gp210/Fs(2)Ket/Nup205/Nup154/Nup93-2/Karybeta3/Nup160	9
GO:0030866	cortical actin cytoskeleton organization	7/118	148/18885	4.01749e-05	0.00779393	0.00720611	Hem/Fim/scra/Sra-1/Sec8/sti/pav	7
GO:0022613	ribonucleoprotein complex biogenesis	11/118	413/18885	5.63443e-05	0.00810392	0.00749271	Non1/su(w[a])/me31B/eIF2beta/CG12325/CG1671/CG33217/CG11837/l(3)72Dn/Usp39/CG7246	11
GO:0034660	ncRNA metabolic process	12/118	500/18885	6.97739e-05	0.00810392	0.00749271	GluProRS/CG12325/CG1671/CG33217/IntS11/CG11837/omd/Ddx1/l(3)72Dn/ArgRS/CG7246/GlnRS	12
GO:0006913	nucleocytoplasmic transport	8/118	221/18885	7.5191e-05	0.00810392	0.00749271	Nup75/Gp210/Fs(2)Ket/Nup205/Nup154/Nup93-2/Karybeta3/Nup160	8
GO:0051169	nuclear transport	8/118	221/18885	7.5191e-05	0.00810392	0.00749271	Nup75/Gp210/Fs(2)Ket/Nup205/Nup154/Nup93-2/Karybeta3/Nup160	8
GO:0072594	establishment of protein localization to organelle	9/118	296/18885	0.0001016	0.00985523	0.00911195	Hsc70-5/Nup75/Gp210/Fs(2)Ket/Nup205/Nup154/Nup93-2/Karybeta3/Nup160	9
GO:0033365	protein localization to organelle	10/118	433/18885	0.000389261	0.0316894	0.0292994	Hsc70-5/Nup75/Gp210/Fs(2)Ket/Nup205/Nup154/cal1/Nup93-2/Karybeta3/Nup160	10
GO:0034470	ncRNA processing	9/118	355/18885	0.000392034	0.0316894	0.0292994	CG12325/CG1671/CG33217/IntS11/CG11837/omd/Ddx1/l(3)72Dn/CG7246	9
GO:0030865	cortical cytoskeleton organization	7/118	218/18885	0.000442583	0.0330235	0.0305329	Hem/Fim/scra/Sra-1/Sec8/sti/pav	7
GO:0030490	maturation of SSU-rRNA	4/118	59/18885	0.000505683	0.0348689	0.0322391	CG12325/CG1671/l(3)72Dn/CG7246	4
GO:0044837	actomyosin contractile ring organization	4/118	60/18885	0.00053921	0.0348689	0.0322391	scra/Sec8/sti/pav	4
GO:0006974	cellular response to DNA damage stimulus	9/118	378/18885	0.000616095	0.037192	0.034387	tefu/HipHop/Top3alpha/Ino80/DNAlig3/Ssl1/Ddx1/mus101/Nup160	9
GO:1903046	meiotic cell cycle process	9/118	381/18885	0.000651818	0.037192	0.034387	mud/tefu/tef/Nup154/scra/cal1/Sec8/sti/alphaCOP	9
GO:0036335	intestinal stem cell homeostasis	4/118	69/18885	0.000915571	0.0493391	0.0456179	SERCA/Pvr/Cat/PHGPx	4
