# Supplementary material for: The role of RNA in the maintenance of chromatin domains as revealed by antibody-mediated proximity labelling coupled to mass spectrometry
Source: eLife. 2024 May 8;13:e95718. doi: 10.7554/eLife.95718 (PMC11147508; doi:10.7554/eLife.95718)
Supplement: Supplementary file 3. [file elife-95718-supp3.xlsx]

## Sheet: MSL2_C_Exp_vs_CID_C_Exp
name	Uniprot	symbol	imputed	num_NAs	MSL2_C_Exp_vs_CID_C_Exp.MSL2_C_Exp_vs_CID_C_Exp.logFC	MSL2_C_Exp_vs_CID_C_Exp.MSL2_C_Exp_vs_CID_C_Exp.CI.L	MSL2_C_Exp_vs_CID_C_Exp.MSL2_C_Exp_vs_CID_C_Exp.CI.R	MSL2_C_Exp_vs_CID_C_Exp.MSL2_C_Exp_vs_CID_C_Exp.AveExpr	MSL2_C_Exp_vs_CID_C_Exp.MSL2_C_Exp_vs_CID_C_Exp.t	MSL2_C_Exp_vs_CID_C_Exp.MSL2_C_Exp_vs_CID_C_Exp.P.Value	MSL2_C_Exp_vs_CID_C_Exp.MSL2_C_Exp_vs_CID_C_Exp.adj.P.Val	MSL2_C_Exp_vs_CID_C_Exp.MSL2_C_Exp_vs_CID_C_Exp.B	MSL2_C_Exp_vs_CID_C_Exp.MSL2_C_Exp_vs_CID_C_Exp.q.val	MSL2_C_Exp_vs_CID_C_Exp.MSL2_C_Exp_vs_CID_C_Exp.SEM
A0A0B4JCV4	A0A0B4JCV4	tacc	FALSE	0	-0.546441	-0.863304	-0.229578	26.7358	-4.29444	0.00600607	0.0426285	-2.71665	0.0159162	0.127244
A0A0B4JCZ3	A0A0B4JCZ3	pre-mod(mdg4)-W	TRUE	3	0.295083	-0.0405204	0.630686	24.8948	2.18954	0.0743572	0.185081	-5.45895	0.0691039	0.134769
A0A0B4JD24	A0A0B4JD24	CG17002	TRUE	2	-0.0220694	-0.41915	0.375011	24.9997	-0.138404	0.894765	0.932377	-7.47996	0.348122	0.159457
A0A0B4JD39	A0A0B4JD39	ttk	FALSE	0	0.324663	-0.0267579	0.676084	28.2752	2.30059	0.0641543	0.172397	-5.30523	0.0643681	0.141121
A0A0B4JD46	A0A0B4JD46	CNBP	FALSE	0	0.0563894	-0.345214	0.457992	27.9045	0.349651	0.739377	0.832335	-7.42015	0.310769	0.161273
A0A0B4JDA0	A0A0B4JDA0	mor	FALSE	0	0.0689937	-0.463609	0.601596	29.1299	0.322583	0.758717	0.842697	-7.43062	0.314638	0.213879
A0A0B4K618	A0A0B4K618	Fmr1	FALSE	0	0.0930579	-0.230557	0.416672	31.6156	0.716078	0.502706	0.650167	-7.20298	0.242753	0.129955
A0A0B4K652	A0A0B4K652	RpII15	FALSE	0	0.398753	-0.166315	0.963821	26.5591	1.75727	0.132932	0.268633	-6.04749	0.100299	0.226916
A0A0B4K661	A0A0B4K661	Tm1	TRUE	3	-0.863297	-1.22497	-0.501625	25.6398	-5.94402	0.0012991	0.0252025	-0.991223	0.00940985	0.145238
A0A0B4K6U6	A0A0B4K6U6	sqd	FALSE	0	-0.513402	-0.862106	-0.164698	30.7224	-3.66636	0.0118725	0.0566379	-3.47694	0.0211469	0.14003
A0A0B4K6W1	A0A0B4K6W1	su(Hw)	FALSE	0	-0.0981727	-0.416193	0.219847	28.4828	-0.768725	0.473231	0.624596	-7.16119	0.233206	0.127708
A0A0B4K7T7	A0A0B4K7T7	RhoGEF2	FALSE	0	-0.290761	-0.686038	0.104516	27.0114	-1.83176	0.12023	0.251705	-5.94796	0.0939791	0.158733
A0A0B4K849	A0A0B4K849	hts	FALSE	0	-0.220646	-0.531156	0.0898643	29.8008	-1.76952	0.130755	0.267956	-6.03121	0.100047	0.124693
A0A0B4KED0	A0A0B4KED0	RpL38	FALSE	0	-0.346258	-0.783244	0.0907284	26.866	-1.97318	0.0993714	0.223298	-5.7564	0.0833728	0.175482
A0A0B4KEE4	A0A0B4KEE4	koi	FALSE	0	0.279396	-0.0322993	0.591091	31.3322	2.23216	0.0702542	0.181084	-5.40001	0.0676113	0.125169
A0A0B4KER0	A0A0B4KER0	row	FALSE	0	0.14413	-0.162745	0.451006	30.1737	1.16957	0.289552	0.450214	-6.77243	0.168097	0.123233
A0A0B4KFV4	A0A0B4KFV4	CG15107	FALSE	0	-0.0656627	-0.376996	0.24567	27.1959	-0.525204	0.619581	0.743715	-7.33301	0.277681	0.125023
A0A0B4KG58	A0A0B4KG58	Patronin	FALSE	0	0.50626	0.0818032	0.930716	28.1011	2.97013	0.0271335	0.0951309	-4.38563	0.035519	0.17045
A0A0B4KG97	A0A0B4KG97	fru	FALSE	0	0.86372	0.530185	1.19726	26.0841	6.44861	0.000866133	0.0248544	-0.533225	0.00927989	0.133939
A0A0B4KGP8	A0A0B4KGP8	eIF2gamma	FALSE	0	-0.657932	-0.996989	-0.318875	28.2741	-4.83218	0.00350844	0.0377106	-2.11255	0.01408	0.136156
A0A0B4KH12	A0A0B4KH12	bon	FALSE	0	0.5645	0.257236	0.871765	27.3175	4.57495	0.00451447	0.0404218	-2.39621	0.0150923	0.123389
A0A0B4KH25	A0A0B4KH25	His2Av	FALSE	0	-0.143275	-0.452368	0.165817	34.3441	-1.1543	0.295268	0.455824	-6.78922	0.170191	0.124123
A0A0B4KHD9	A0A0B4KHD9	CG5746	TRUE	1	-0.00954911	-0.537618	0.51852	25.2051	-0.0450305	0.965646	0.970649	-7.49001	0.362412	0.212059
A0A0B4KHE1	A0A0B4KHE1	CG15514	FALSE	0	0.472028	0.0838837	0.860173	25.6506	3.02837	0.0252488	0.0907087	-4.30727	0.0338679	0.155869
A0A0B4KHH6	A0A0B4KHH6	dgt1	FALSE	0	-0.0221619	-0.344841	0.300517	29.1409	-0.17103	0.870214	0.922522	-7.47406	0.344442	0.129579
A0A0B4KHI4	A0A0B4KHI4	Syp	TRUE	3	0.887485	0.397923	1.37705	25.491	4.51428	0.00479744	0.0404323	-2.46452	0.0150962	0.196595
A0A0B4KHR8	A0A0B4KHR8	mask	FALSE	0	-0.916952	-1.52758	-0.306323	28.3561	-3.73942	0.0109338	0.0544132	-3.38547	0.0203163	0.245213
A0A0B4KHX3	A0A0B4KHX3	dco	FALSE	0	0.154953	-0.188844	0.498751	28.0001	1.12236	0.307531	0.471009	-6.82389	0.175861	0.13806
A0A0B4KI24	A0A0B4KI24	Nlp	FALSE	0	-0.52747	-0.937683	-0.117257	25.9223	-3.20202	0.0204336	0.0803539	-4.076	0.0300017	0.164731
A0A0B4KI32	A0A0B4KI32	cindr	TRUE	1	-0.677086	-1.0957	-0.258467	25.3872	-4.02772	0.00796338	0.0482737	-3.03227	0.018024	0.168106
A0A0B4KI43	A0A0B4KI43	woc	FALSE	0	0.207188	-0.105588	0.519963	29.0853	1.64955	0.153677	0.29421	-6.18924	0.109849	0.125602
A0A0B4LEV8	A0A0B4LEV8	coil	FALSE	0	0.313654	-0.00342052	0.630729	28.7314	2.46334	0.0517853	0.156161	-5.07976	0.0583058	0.127329
A0A0B4LF82	A0A0B4LF82	Sin3A	FALSE	0	0.366593	0.0317868	0.7014	30.5866	2.72663	0.036857	0.120665	-4.71681	0.0450528	0.134449
A0A0B4LFB3	A0A0B4LFB3	eIF3m	FALSE	0	-0.477087	-0.880417	-0.0737565	25.9132	-2.94558	0.0279735	0.0974884	-4.41875	0.0363993	0.161967
A0A0B4LFL3	A0A0B4LFL3	eEF1beta	FALSE	0	-0.488285	-0.796882	-0.179689	28.5742	-3.94019	0.00875611	0.0496235	-3.13818	0.0185279	0.123924
A0A0B4LG52	A0A0B4LG52	RpS16	FALSE	0	-0.366149	-0.698197	-0.0341015	30.9611	-2.74595	0.0359611	0.119596	-4.69034	0.0446537	0.133342
A0A0B4LGH1	A0A0B4LGH1	betaTub60D	FALSE	0	0.04376	-0.308144	0.395664	27.7915	0.309662	0.768019	0.851404	-7.43534	0.317889	0.141315
A0A0B4LGT9	A0A0B4LGT9	CG9667	FALSE	0	0.00760968	-0.322327	0.337546	25.215	0.0574343	0.956194	0.965588	-7.48926	0.360522	0.132494
A0A0B4LGV6	A0A0B4LGV6	Ibf1	FALSE	0	-0.193378	-0.527379	0.140624	29.85	-1.44176	0.202889	0.351912	-6.45319	0.131393	0.134126
A0A0B4LGW1	A0A0B4LGW1	sub	FALSE	0	-0.315294	-0.661082	0.0304947	26.9288	-2.27059	0.0667567	0.176602	-5.34679	0.0659379	0.13886
A0A0B4LGZ0	A0A0B4LGZ0	Unc-115a	FALSE	0	0.99664	0.658418	1.33486	28.1022	7.33788	0.000449296	0.0178907	0.207258	0.00667985	0.135821
A0A0B4LGZ5	A0A0B4LGZ5	RpL11	FALSE	0	-0.256838	-0.574935	0.06126	30.1795	-2.01063	0.0944897	0.217364	-5.70521	0.0811571	0.12774
A0A0B4LH50	A0A0B4LH50	Act87E	FALSE	0	-0.977762	-1.28091	-0.674616	29.9193	-8.03185	0.000281491	0.0148934	0.733093	0.00556077	0.121736
A0A0B4LHR3	A0A0B4LHR3	XNP	FALSE	0	-0.215514	-0.571458	0.140429	28.0042	-1.50775	0.18583	0.338107	-6.37093	0.126239	0.142938
A0A0B4LHU8	A0A0B4LHU8	kay	FALSE	0	-0.595549	-0.946373	-0.244725	26.4641	-4.2273	0.00644164	0.0436707	-2.79508	0.0163054	0.140882
A0A0B4LI86	A0A0B4LI86	RpII140	FALSE	0	0.171218	-0.133795	0.476231	30.9056	1.39787	0.215034	0.368088	-6.50696	0.137433	0.122485
A0A0B4LIJ0	A0A0B4LIJ0	Rpt2	FALSE	0	-0.649854	-1.05008	-0.249627	27.0402	-4.04338	0.0078303	0.0479709	-3.01344	0.0179109	0.16072
A0A126GUM1	A0A126GUM1	psq	FALSE	0	0.176995	-0.272822	0.626812	26.5707	0.979849	0.367591	0.528886	-6.97072	0.19747	0.180635
A0A126GUM8	A0A126GUM8	lig	FALSE	0	0.05523	-0.308215	0.418675	29.9284	0.378417	0.719054	0.818026	-7.40813	0.305427	0.14595
A0A126GUU7	A0A126GUU7	Bin1	FALSE	0	0.223124	-0.0975706	0.543819	29.4565	1.73257	0.137431	0.273921	-6.08025	0.102274	0.128783
A0A126GUZ1	A0A126GUZ1	pre-mod(mdg4)-V	FALSE	0	0.503212	0.184245	0.822179	27.1153	3.92862	0.00886743	0.0496235	-3.15227	0.0185279	0.128089
A1A708	A1A708	CG4951	FALSE	0	0.196844	-0.267435	0.661124	26.7284	1.05579	0.334486	0.496926	-6.89413	0.185538	0.186442
A1Z6M0	A1Z6M0	Bap170	FALSE	0	0.247761	-0.0644772	0.56	28.4909	1.97598	0.0989981	0.223298	-5.75258	0.0833728	0.125387
A1Z6Q0	A1Z6Q0	koi	FALSE	0	0.0307215	-0.359319	0.420762	29.454	0.19614	0.851425	0.912578	-7.46867	0.340729	0.15663
A1Z7K8	A1Z7K8	AIMP1	TRUE	2	0.977411	0.321847	1.63297	25.6401	3.71276	0.0112663	0.0552199	-3.41875	0.0206175	0.263257
A1Z7P7	A1Z7P7	Su(var)2-10	FALSE	0	0.0924873	-0.221863	0.406838	27.6817	0.73266	0.493289	0.640835	-7.19008	0.239269	0.126235
A1Z830	A1Z830	CG12128	FALSE	0	-0.402411	-0.706845	-0.0979773	28.427	-3.29164	0.0183527	0.0742611	-3.95809	0.0277269	0.122253
A1Z898	A1Z898	Caf1-105	TRUE	4	-0.306573	-0.723149	0.110003	25.2701	-1.83263	0.120089	0.251705	-5.9468	0.0939791	0.167286
A1Z8D5	A1Z8D5	CG18004	FALSE	0	0.726634	0.377941	1.07533	26.6747	5.18928	0.00250857	0.0310378	-1.73439	0.0115886	0.140026
A1Z968	A1Z968	NAT1	TRUE	2	-0.644856	-1.31819	0.0284727	25.6988	-2.3849	0.0573973	0.162195	-5.1884	0.0605588	0.270391
A1Z9E2	A1Z9E2	mip120	FALSE	0	0.491404	0.135825	0.846982	28.4004	3.44142	0.0153798	0.0651277	-3.76342	0.0243168	0.142791
A1Z9G2	A1Z9G2	fand	FALSE	0	-0.267936	-0.749508	0.213636	27.3481	-1.3855	0.218577	0.370881	-6.52198	0.138476	0.193386
A1Z9K0	A1Z9K0	CG6701	FALSE	0	-1.81688	-3.07194	-0.561827	25.2684	-3.60495	0.0127319	0.0578904	-3.55443	0.0216146	0.503998
A1Z9S6	A1Z9S6	Su(var)2-HP2	FALSE	0	0.148215	-0.170756	0.467186	29.7809	1.15711	0.294208	0.455396	-6.78614	0.170031	0.12809
A1Z9S8	A1Z9S8	CG12863	FALSE	0	0.443102	0.0657153	0.820489	26.8745	2.92383	0.0287418	0.0995698	-4.44816	0.0371764	0.151549
A1ZAV3	A1ZAV3	MESR4	FALSE	0	0.16832	-0.178606	0.515245	28.0659	1.20819	0.27553	0.436943	-6.7294	0.163142	0.139316
A1ZBE9	A1ZBE9	MetRS	FALSE	0	0.265854	-0.343795	0.875504	29.414	1.08592	0.322051	0.488591	-6.86268	0.182425	0.244819
A1ZBW6	A1ZBW6	CG11180	FALSE	0	-0.212225	-0.604829	0.180378	27.9629	-1.3461	0.230219	0.386994	-6.56935	0.144492	0.157659
A4V038	A4V038	msl-2	TRUE	3	4.6193	4.27391	4.96468	27.2295	33.3051	1.18723e-07	6.90968e-05	8.41275	2.57987e-05	0.138696
A4V2K7	A4V2K7	D1	FALSE	0	-1.43045	-1.78069	-1.08022	29.8711	-10.1706	8.08752e-05	0.0067242	2.12307	0.00251061	0.140646
A4V2S3	A4V2S3	CtBP	FALSE	0	0.424159	0.123999	0.724319	28.364	3.51893	0.0140549	0.0624426	-3.66388	0.0233142	0.120536
A4V3J6	A4V3J6	Hrb98DE	FALSE	0	0.197398	-0.212061	0.606858	30.3086	1.20051	0.278268	0.438894	-6.73802	0.16387	0.164428
A8DYD2	A8DYD2	cg	FALSE	0	0.444226	0.0764755	0.811977	29.4358	3.00805	0.0258895	0.0913192	-4.33456	0.0340959	0.147679
A8DYI6	A8DYI6	Phb2	FALSE	0	-0.232822	-0.583052	0.117409	31.2299	-1.65541	0.152472	0.292867	-6.18161	0.109348	0.140643
B7YZQ7	B7YZQ7	Nurf-38	FALSE	0	0.0860663	-0.264007	0.436139	28.6864	0.612223	0.564412	0.707947	-7.27807	0.264327	0.14058
B7Z0G1	B7Z0G1	hay	FALSE	0	0.240815	-0.212606	0.694237	26.2534	1.32256	0.237444	0.396725	-6.59732	0.148125	0.182082
B7Z120	B7Z120	Tlk	FALSE	0	0.0698774	-0.245871	0.385626	28.0859	0.5511	0.602847	0.733787	-7.31745	0.273974	0.126796
C0HL67	C0HL67		FALSE	0	0.547721	-2.35246	3.4479	31.4471	0.470294	0.655906	0.766541	-7.36376	0.286204	1.16464
D2NUK9	D2NUK9	hoip	FALSE	0	-0.591951	-0.943051	-0.240851	31.3117	-4.19846	0.00663969	0.0436707	-2.82899	0.0163054	0.140993
E1JH57	E1JH57	mars	FALSE	0	-0.27409	-0.593494	0.0453142	27.6208	-2.13692	0.0797704	0.193449	-5.53162	0.0722282	0.128264
E1JH79	E1JH79	Mlf	FALSE	0	-0.142291	-0.494251	0.209668	29.0444	-1.00675	0.355574	0.517263	-6.94404	0.193131	0.141338
E1JHA4	E1JHA4	Hrb27C	FALSE	0	-0.0385183	-0.369799	0.292763	30.8018	-0.289538	0.782592	0.86263	-7.44231	0.322081	0.133034
E1JI11	E1JI11	Taf4	FALSE	0	0.223163	-0.0789392	0.525266	27.8807	1.83951	0.11898	0.250892	-5.93754	0.0936756	0.121316
E1JIK0	E1JIK0	Hrb87F	FALSE	0	-0.0248909	-0.441572	0.39179	31.0763	-0.148755	0.88696	0.930125	-7.47822	0.347281	0.167328
E1JJ72	E1JJ72	Taf1	FALSE	0	0.0835495	-0.255733	0.422832	29.2582	0.613222	0.563796	0.707947	-7.27739	0.264327	0.136247
E2QC83	E2QC83	Pabp2	FALSE	0	0.127546	-0.207077	0.462169	28.2358	0.949173	0.38169	0.540495	-7.00051	0.201805	0.134376
E2QCG7	E2QCG7	eIF3b	FALSE	0	-1.081	-1.66254	-0.499458	27.8867	-4.62891	0.00427869	0.0401631	-2.3359	0.0149957	0.233532
E2QD65	E2QD65	RpS19a	FALSE	0	-0.104744	-0.42831	0.218822	29.9502	-0.806121	0.453049	0.607544	-7.13005	0.226839	0.129936
E2QD75	E2QD75	Cbp80	FALSE	0	0.114392	-0.259056	0.48784	28.6439	0.762782	0.476496	0.624596	-7.16603	0.233206	0.149967
E4NKG1	E4NKG1	Capr	FALSE	0	-0.106433	-0.441486	0.22862	28.147	-0.791038	0.461113	0.616937	-7.14275	0.230346	0.134548
E8NHB1	E8NHB1	Taf2	FALSE	0	-0.111557	-0.424876	0.201762	28.4744	-0.886637	0.411744	0.57329	-7.0591	0.21405	0.125821
F0JAG6	F0JAG6	Actn	TRUE	4	0.935244	0.485778	1.38471	24.5356	5.18159	0.00252633	0.0310378	-1.74235	0.0115886	0.180494
F3YDH0	F3YDH0	Hsc70-3	FALSE	0	0.0689346	-0.260745	0.398614	28.6323	0.520691	0.622524	0.743715	-7.33566	0.277681	0.132391
F6J1D0	F6J1D0	sqh	FALSE	0	-0.618263	-1.00992	-0.226608	26.1503	-3.93101	0.00884435	0.0496235	-3.14936	0.0185279	0.157278
G3M3A2	G3M3A2	RpS3	FALSE	0	-0.296742	-0.680833	0.087349	31.403	-1.92389	0.10619	0.233218	-5.8235	0.0870766	0.154241
H0RNK7	H0RNK7	Rtf1	FALSE	0	-0.0829331	-0.412682	0.246816	26.383	-0.626295	0.55578	0.704715	-7.26848	0.26312	0.132419
M9MQH9	M9MQH9	Pp2A-29B	FALSE	0	-0.521136	-0.885732	-0.156541	27.7464	-3.55938	0.0134145	0.0600556	-3.61227	0.022423	0.146412
M9MRD6	M9MRD6	Msp300	TRUE	1	-0.72705	-1.94705	0.492948	26.8586	-1.48402	0.191802	0.343088	-6.4007	0.128099	0.489919
M9MRJ4	M9MRJ4	Msp300	FALSE	0	-0.809602	-1.13065	-0.488558	30.0523	-6.27975	0.000989149	0.0248544	-0.683244	0.00927989	0.128923
M9MSJ7	M9MSJ7	CG42676	FALSE	0	1.03836	0.684198	1.39253	26.6429	7.30093	0.0004611	0.0178907	0.178045	0.00667985	0.142223
M9ND19	M9ND19	Gale	FALSE	0	-0.523575	-0.821879	-0.225271	29.6421	-4.37074	0.00555112	0.0425099	-2.62832	0.0158719	0.119791
M9ND28	M9ND28	Spn	FALSE	0	0.984419	-0.132989	2.10183	26.3919	2.19383	0.0739329	0.185081	-5.45302	0.0691039	0.448721
M9NDM4	M9NDM4	wds	FALSE	0	0.202109	-0.216006	0.620224	27.7754	1.20372	0.277121	0.438273	-6.73442	0.163638	0.167904
M9NDP1	M9NDP1	ctp	FALSE	0	-0.141059	-0.44592	0.163802	28.8575	-1.15221	0.296055	0.455831	-6.79151	0.170194	0.122424
M9NDX3	M9NDX3	Top1	FALSE	0	-0.278336	-0.589405	0.032734	31.1273	-2.22816	0.0706289	0.181084	-5.40554	0.0676113	0.124917
M9NE89	M9NE89	Lam	FALSE	0	-0.41746	-0.74912	-0.0858003	34.3576	-3.13442	0.022176	0.0849108	-4.1656	0.0317032	0.133186
M9NEL3	M9NEL3	kis	FALSE	0	0.289206	-0.0349774	0.61339	30.7097	2.22153	0.071255	0.181888	-5.41472	0.0679115	0.130184
M9NEQ9	M9NEQ9	RpS10b	FALSE	0	0.292177	-0.0717438	0.656097	28.6805	1.99928	0.0959429	0.218976	-5.72074	0.081759	0.146141
M9NF33	M9NF33	Cpsf6	FALSE	0	0.100582	-0.410241	0.611404	29.2703	0.490325	0.642525	0.756401	-7.35291	0.282418	0.205133
M9NFR5	M9NFR5	yps	FALSE	0	0.172649	-0.12924	0.474538	26.2966	1.42414	0.207686	0.357613	-6.47487	0.133522	0.121231
M9NH51	M9NH51	U2af50	FALSE	0	0.473243	-0.000296272	0.946783	27.5671	2.48865	0.0501017	0.152666	-5.04474	0.0570009	0.190161
M9PBE2	M9PBE2	Hakai	FALSE	0	0.818487	0.484021	1.15295	26.6595	6.0939	0.0011486	0.0248544	-0.8521	0.00927989	0.134312
M9PBH8	M9PBH8	CG2199	FALSE	0	0.292563	-0.0343957	0.619521	31.5895	2.22824	0.0706216	0.181084	-5.40543	0.0676113	0.131298
M9PBM1	M9PBM1	U2af38	FALSE	0	-0.167671	-0.556777	0.221436	28.4395	-1.07306	0.327312	0.493511	-6.87618	0.184262	0.156255
M9PC85	M9PC85	x16	FALSE	0	-0.396282	-0.717787	-0.0747766	28.5759	-3.06938	0.0240082	0.0881624	-4.25233	0.0329172	0.129108
M9PC89	M9PC89	snRNP-U1-70K	FALSE	0	0.438187	0.0800535	0.79632	28.2419	3.04684	0.0246817	0.089222	-4.28251	0.0333128	0.143817
M9PCH8	M9PCH8	baf	FALSE	0	0.110033	-0.239712	0.459777	28.5065	0.783438	0.465215	0.619577	-7.14908	0.231332	0.140448
M9PCI2	M9PCI2	NHP2	FALSE	0	-0.0881721	-0.408265	0.231921	29.4069	-0.685946	0.520128	0.667054	-7.22579	0.249058	0.128541
M9PEB2	M9PEB2	Chd1	FALSE	0	0.20074	-0.324718	0.726198	26.1066	0.951329	0.380685	0.540388	-6.99844	0.201765	0.21101
M9PEJ2	M9PEJ2	Ist1	TRUE	1	-1.01431	-1.38313	-0.645486	25.8542	-6.84838	0.000639298	0.0218866	-0.190389	0.00817179	0.148109
M9PEY6	M9PEY6	Rat1	FALSE	0	-0.393992	-0.946985	0.159002	26.7736	-1.7742	0.129933	0.26789	-6.02497	0.100022	0.222068
M9PFN1	M9PFN1	rept	FALSE	0	0.143409	-0.230671	0.517488	29.1416	0.954655	0.37914	0.53951	-6.99524	0.201437	0.15022
M9PG50	M9PG50	Cdk12	FALSE	0	0.358915	0.0395981	0.678232	27.7927	2.79901	0.0336202	0.114427	-4.61781	0.0427235	0.128229
M9PGQ6	M9PGQ6	Bx42	FALSE	0	0.434375	-0.0185271	0.887276	27.4098	2.38834	0.0571385	0.162195	-5.18365	0.0605588	0.181873
M9PI05	M9PI05	JIL-1	FALSE	0	-0.678962	-1.06931	-0.288612	30.4422	-4.33139	0.00578069	0.0426285	-2.67377	0.0159162	0.156754
M9PI47	M9PI47	Sap130	FALSE	0	0.36282	-0.0125372	0.738177	26.7882	2.40703	0.0557515	0.162195	-5.15775	0.0605588	0.150733
M9PID3	M9PID3	HIPP1	FALSE	0	0.479826	0.17825	0.781401	28.8538	3.96207	0.00854994	0.0496235	-3.1116	0.0185279	0.121105
N0D8I3	N0D8I3	Spt6	FALSE	0	-0.94175	-1.24522	-0.638282	30.7716	-7.72783	0.000343964	0.0166823	0.50791	0.00622866	0.121865
O02193	O02193	mof	FALSE	0	0.179615	-0.256958	0.616187	29.421	1.02452	0.347811	0.509889	-6.92614	0.190378	0.175316
O02195	O02195	eIF3i	FALSE	0	-0.348875	-0.724875	0.0271251	25.9089	-2.31056	0.0633138	0.17219	-5.29143	0.0642906	0.150992
O16810	O16810	Orc1	FALSE	0	0.642655	0.333836	0.951475	27.5804	5.18213	0.00252507	0.0310378	-1.74178	0.0115886	0.124014
O18373	O18373	Sps1	FALSE	0	0.159476	-0.160932	0.479883	28.4051	1.23944	0.264617	0.427797	-6.69397	0.159727	0.128667
O18640	O18640	Rack1	FALSE	0	-0.0150216	-0.323116	0.293073	29.0419	-0.121413	0.907604	0.934912	-7.48255	0.349068	0.123723
O44434	O44434	qkr58E-3	FALSE	0	0.30057	-0.226101	0.827242	27.9344	1.42115	0.208509	0.357971	-6.47853	0.133656	0.211498
O46048	O46048	east	FALSE	0	0.745776	0.438058	1.05349	29.4285	6.03518	0.00120502	0.0248544	-0.906286	0.00927989	0.123572
O46106	O46106	noi	FALSE	0	0.109346	-0.221712	0.440404	27.3803	0.822495	0.444411	0.601505	-7.11605	0.224584	0.132944
O46307	O46307	CG11417	FALSE	0	-0.336954	-0.639565	-0.0343421	28.2972	-2.77281	0.0347549	0.116921	-4.6536	0.0436548	0.121521
O61345	O61345	peng	FALSE	0	-0.454945	-0.799224	-0.110667	29.4491	-3.29067	0.0183739	0.0742611	-3.95936	0.0277269	0.138253
O61360	O61360	crol	FALSE	0	0.176913	-0.180845	0.534672	30.5602	1.23142	0.267382	0.43107	-6.70312	0.160949	0.143667
O77410	O77410	eIF3e	FALSE	0	-0.445542	-0.807697	-0.0833882	29.1203	-3.06359	0.0241793	0.0881624	-4.26008	0.0329172	0.145432
O77459	O77459	ken	FALSE	0	-0.0448257	-0.346883	0.257232	26.706	-0.369549	0.725293	0.820646	-7.41193	0.306405	0.121298
O96689	O96689	vtd	FALSE	0	-0.111239	-0.451847	0.22937	27.6987	-0.813269	0.449263	0.603859	-7.12397	0.225463	0.13678
O97183	O97183	RpII33	FALSE	0	0.188671	-0.1295	0.506842	29.1939	1.47665	0.193693	0.343687	-6.4099	0.128323	0.127769
P04052	P04052	RpII215	FALSE	0	0.114356	-0.198165	0.426878	31.175	0.911202	0.399728	0.563297	-7.03644	0.210318	0.1255
P05205	P05205	Su(var)205	FALSE	0	-0.336282	-0.709534	0.0369692	29.5851	-2.24356	0.0691972	0.180868	-5.38423	0.0675308	0.149888
P05552	P05552	Adf1	FALSE	0	0.0486501	-0.310799	0.408099	27.5604	0.337039	0.748363	0.835983	-7.42513	0.312131	0.144345
P06603	P06603	alphaTub84B	FALSE	0	-0.434278	-0.787501	-0.0810557	32.7951	-3.06164	0.0242371	0.0881624	-4.26269	0.0329172	0.141845
P07664	P07664	Sry-delta	FALSE	0	-0.500326	-0.799815	-0.200837	27.003	-4.16014	0.00691359	0.0447079	-2.87423	0.0166926	0.120267
P13709	P13709	fs(1)h	FALSE	0	0.220324	-0.0927367	0.533384	28.1396	1.75254	0.133781	0.269199	-6.05377	0.100511	0.125717
P17704	P17704	RpS17	FALSE	0	-0.291638	-0.60065	0.0173735	29.8678	-2.3502	0.0600829	0.167227	-5.2365	0.0624376	0.124091
P17886	P17886	crn	FALSE	0	-0.482517	-0.964798	-0.000235828	26.611	-2.49142	0.0499206	0.152666	-5.0409	0.0570009	0.193671
P18289	P18289	Jra	FALSE	0	0.085247	-0.253055	0.423549	26.3822	0.627494	0.555049	0.704715	-7.26766	0.26312	0.135853
P19018	P19018	tra2	FALSE	0	0.195676	-0.127924	0.519276	26.4026	1.50579	0.186318	0.338107	-6.37341	0.126239	0.129949
P20227	P20227	Tbp	FALSE	0	0.14685	-0.295271	0.588971	28.2703	0.827118	0.441994	0.599628	-7.11206	0.223883	0.177544
P20240	P20240	Ote	FALSE	0	0.00895462	-0.310021	0.32793	31.5284	0.0699075	0.946697	0.961567	-7.48833	0.35902	0.128092
P21187	P21187	pAbp	FALSE	0	-0.137019	-0.460671	0.186633	31.5657	-1.05423	0.33514	0.496926	-6.89574	0.185538	0.12997
P24785	P24785	mle	FALSE	0	0.642053	0.283131	1.00098	29.049	4.45457	0.00509585	0.0404323	-2.53229	0.0150962	0.144134
P25171	P25171	Rcc1	FALSE	0	-0.171533	-0.783373	0.440306	28.8529	-0.698146	0.513026	0.660578	-7.21666	0.24664	0.245698
P25439	P25439	brm	FALSE	0	0.194606	-0.119072	0.508283	30.3671	1.54492	0.176827	0.325675	-6.32392	0.121597	0.125965
P25991	P25991	su(f)	FALSE	0	-0.499338	-2.01818	1.0195	25.5394	-0.818685	0.44641	0.602563	-7.11933	0.224979	0.609927
P26017	P26017	Pc	FALSE	0	0.339967	0.0245857	0.655349	25.9048	2.68433	0.0389034	0.125093	-4.77485	0.0467059	0.126649
P28668	P28668	GluProRS	FALSE	0	0.232889	-0.355641	0.82142	30.7972	0.985407	0.365082	0.52736	-6.96525	0.1969	0.236338
P34739	P34739	lds	FALSE	0	-0.0838284	-0.478793	0.311136	28.9494	-0.528528	0.617419	0.743715	-7.33105	0.277681	0.158607
P35875	P35875	Parp	TRUE	4	0.429042	-0.133848	0.991931	25.1003	1.89806	0.10995	0.238772	-5.85852	0.0891504	0.226042
P38979	P38979	sta	FALSE	0	0.117248	-0.222331	0.456828	28.8035	0.859807	0.425181	0.586387	-7.08332	0.21894	0.136366
P41073	P41073	Pep	FALSE	0	0.60524	0.269407	0.941074	32.631	4.48785	0.00492699	0.0404323	-2.49445	0.0150962	0.134862
P45594	P45594	tsr	FALSE	0	0.724394	0.327405	1.12138	27.4274	4.54392	0.00465674	0.0404323	-2.43108	0.0150962	0.15942
P45889	P45889	Arp1	FALSE	0	-0.510528	-0.889463	-0.131592	27.0808	-3.35497	0.017024	0.0707714	-3.87541	0.0264239	0.152171
P48555	P48555	Rala	FALSE	0	-0.169838	-0.496323	0.156647	26.0082	-1.29541	0.246033	0.407763	-6.62927	0.152247	0.131108
P48588	P48588	RpS25	FALSE	0	-0.799918	-1.12522	-0.474619	28.4575	-6.12347	0.00112135	0.0248544	-0.824969	0.00927989	0.130632
P49846	P49846	Taf5	FALSE	0	0.0404356	-0.299656	0.380528	28.1083	0.296075	0.777847	0.86066	-7.4401	0.321345	0.136572
P49847	P49847	Taf6	FALSE	0	0.620081	-0.213003	1.45317	26.6274	1.85351	0.116756	0.247098	-5.91871	0.092259	0.334545
P50536	P50536	msl-3	FALSE	0	1.24203	0.876565	1.6075	27.4519	8.4629	0.00021419	0.0124659	1.03941	0.00465438	0.146762
P51406	P51406	bys	FALSE	0	-0.797351	-1.16957	-0.42513	28.5119	-5.33437	0.00219904	0.0310378	-1.58576	0.0115886	0.149474
P52295	P52295	Pen	FALSE	0	-0.258356	-0.645012	0.128299	29.7279	-1.66391	0.150738	0.29146	-6.17051	0.108823	0.155271
P53034	P53034	RfC4	FALSE	0	-0.394662	-0.757152	-0.0321712	28.1788	-2.71121	0.037589	0.122217	-4.73795	0.0456321	0.145567
P54357	P54357	Mlc-c	FALSE	0	-1.07947	-1.38295	-0.775992	28.8934	-8.85765	0.000168529	0.0108982	1.30747	0.00406906	0.121868
P54622	P54622	mtSSB	FALSE	0	0.066816	-0.273362	0.406994	27.1127	0.489113	0.643331	0.756401	-7.35357	0.282418	0.136606
P55830	P55830	RpS3A	FALSE	0	-0.350465	-0.690947	-0.00998235	31.9097	-2.56321	0.0454722	0.143053	-4.94167	0.0534118	0.136729
P56538	P56538	eIF6	FALSE	0	-0.302492	-0.615796	0.0108115	27.1266	-2.40427	0.0559539	0.162195	-5.16157	0.0605588	0.125815
P80455	P80455	RpS12	FALSE	0	0.290235	-0.0988679	0.679339	26.6189	1.85746	0.116135	0.247098	-5.91338	0.092259	0.156254
P91638	P91638	smid	FALSE	0	-1.50709	-1.92455	-1.08964	28.5952	-8.99006	0.000155835	0.0108982	1.39486	0.00406906	0.16764
P92177	P92177	14-3-3epsilon	FALSE	0	0.476131	0.131971	0.820292	27.3399	3.44509	0.015314	0.0651277	-3.75868	0.0243168	0.138206
Q02427	Q02427	Rbp1	FALSE	0	0.501178	0.193801	0.808555	29.649	4.06027	0.00768954	0.0476097	-2.99317	0.017776	0.123435
Q05856	Q05856	SmB	FALSE	0	0.208919	-0.289746	0.707584	29.5301	1.04329	0.339763	0.500612	-6.90701	0.186914	0.200251
Q0E8G6	Q0E8G6	Cpsf5	FALSE	0	0.0169627	-0.290488	0.324414	27.9954	0.137389	0.895531	0.932377	-7.48013	0.348122	0.123464
Q0E8J0	Q0E8J0	MEP-1	FALSE	0	-0.0557908	-0.535432	0.423851	27.3603	-0.289655	0.782507	0.86263	-7.44227	0.322081	0.192611
Q0E8X6	Q0E8X6	eIF2Bdelta	FALSE	0	-0.609977	-0.941081	-0.278874	27.1087	-4.58759	0.00445792	0.0404218	-2.38204	0.0150923	0.132962
Q0E931	Q0E931	Dgp-1	FALSE	0	0.114827	-0.202078	0.431732	26.839	0.902295	0.404053	0.566648	-7.04471	0.21157	0.127261
Q0E965	Q0E965	SRPK	FALSE	0	-0.280896	-0.585257	0.0234645	27.5785	-2.29822	0.0643561	0.172397	-5.30852	0.0643681	0.122223
Q0KI68	Q0KI68	nsl1	FALSE	0	-0.0390552	-0.439688	0.361578	27.9277	-0.242754	0.816844	0.887719	-7.45676	0.331448	0.160884
Q1LZ24	Q1LZ24	CG1603	FALSE	0	0.0692275	-0.237967	0.376422	27.5499	0.561177	0.596406	0.730755	-7.31121	0.272842	0.123361
Q24090	Q24090	Snr1	FALSE	0	0.236108	-0.12264	0.594856	27.1741	1.63891	0.155889	0.296496	-6.20308	0.110703	0.144064
Q24169	Q24169	Orc5	FALSE	0	0.331208	-0.0863167	0.748733	26.4942	1.97539	0.0990759	0.223298	-5.75338	0.0833728	0.167667
Q24318	Q24318	Dp	FALSE	0	0.0946793	-0.214228	0.403587	26.5201	0.763241	0.476243	0.624596	-7.16566	0.233206	0.124049
Q24319	Q24319	Ost48	FALSE	0	-0.148754	-0.527183	0.229674	28.8761	-0.97886	0.368039	0.528886	-6.97169	0.19747	0.151967
Q24478	Q24478	Cp190	FALSE	0	0.0784163	-0.319222	0.476054	28.8648	0.491081	0.642023	0.756401	-7.35249	0.282418	0.159681
Q24491	Q24491	Rsf1	FALSE	0	-0.329509	-0.670631	0.0116127	25.5425	-2.40543	0.0558687	0.162195	-5.15996	0.0605588	0.136986
Q24492	Q24492	RpA-70	FALSE	0	-0.161028	-0.483401	0.161346	28.4269	-1.24387	0.263101	0.426532	-6.68891	0.159254	0.129457
Q24572	Q24572	Caf1-55	FALSE	0	0.0886906	-0.24289	0.420271	30.1458	0.666076	0.531834	0.678788	-7.24038	0.253439	0.133154
Q27237	Q27237	CG5504	FALSE	0	-0.723994	-1.17268	-0.275312	26.6666	-4.0182	0.00804562	0.0482737	-3.04374	0.018024	0.180179
Q27268	Q27268	Hel25E	FALSE	0	-0.463418	-0.774636	-0.152199	28.6565	-3.70802	0.0113266	0.0552199	-3.42468	0.0206175	0.124977
Q27294	Q27294	caz	TRUE	4	-0.419141	-1.07835	0.24007	24.8348	-1.58333	0.167964	0.313318	-6.27487	0.116984	0.264722
Q2PDY2	Q2PDY2	Trl	FALSE	0	0.109338	-0.246467	0.465144	29.3528	0.765236	0.475145	0.624596	-7.16403	0.233206	0.142882
Q53YG3	Q53YG3	Myb	FALSE	0	0.0630028	-0.253145	0.37915	27.5599	0.496255	0.638592	0.756401	-7.34961	0.282418	0.126956
Q53ZT0	Q53ZT0	DnaJ-1	FALSE	0	-0.161176	-0.491968	0.169616	28.9738	-1.21333	0.273705	0.435236	-6.7236	0.162504	0.132837
Q59E33	Q59E33	scaf6	FALSE	0	0.152464	-0.184056	0.488984	26.0658	1.12822	0.305252	0.468751	-6.81758	0.175018	0.135138
Q5BI50	Q5BI50	Cul4	FALSE	0	0.0535837	-0.299805	0.406972	27.9723	0.377585	0.719638	0.818026	-7.40849	0.305427	0.141912
Q5EAK6	Q5EAK6	tefu	FALSE	0	0.735638	-2.59859	4.06986	28.5328	0.54942	0.603925	0.733787	-7.31848	0.273974	1.33894
Q5LJZ2	Q5LJZ2	Set1	FALSE	0	0.0543431	-0.345685	0.454371	26.5918	0.33829	0.74747	0.835983	-7.42464	0.312131	0.160641
Q6AWG9	Q6AWG9	CG5098	FALSE	0	-0.379673	-0.756711	-0.00263508	26.4751	-2.50761	0.0488786	0.150515	-5.01851	0.0561978	0.151409
Q6NP69	Q6NP69	gfzf	FALSE	0	-0.190648	-0.511294	0.129999	30.4009	-1.48061	0.192677	0.343088	-6.40496	0.128099	0.128763
Q709R6	Q709R6	bocks	FALSE	0	0.639377	0.22174	1.05702	27.9588	3.81235	0.0100791	0.0526594	-3.29495	0.0196615	0.167712
Q7JNE1	Q7JNE1	prod	FALSE	0	-0.0734779	-0.404451	0.257495	30.0133	-0.55284	0.601732	0.733787	-7.31638	0.273974	0.13291
Q7JQY8	Q7JQY8	CG30020	FALSE	0	0.293735	-0.0107969	0.598266	28.1059	2.40192	0.0561273	0.162195	-5.16483	0.0605588	0.122292
Q7JRH5	Q7JRH5	CG5726	FALSE	0	0.367022	-0.0839023	0.817947	28.8945	2.02686	0.0924519	0.216092	-5.68299	0.0806825	0.181079
Q7JRJ9	Q7JRJ9	Incenp	FALSE	0	-0.228227	-0.548898	0.0924447	27.7837	-1.77232	0.130263	0.26789	-6.02748	0.100022	0.128773
Q7JVP4	Q7JVP4	Br140	FALSE	0	0.311565	-0.0258779	0.649007	27.5799	2.29923	0.06427	0.172397	-5.30712	0.0643681	0.135508
Q7JVY0	Q7JVY0	coro	FALSE	0	-0.55223	-1.3771	0.272641	26.1852	-1.66713	0.150088	0.29146	-6.16631	0.108823	0.331247
Q7JXU4	Q7JXU4	Ns2	FALSE	0	-0.802571	-1.1264	-0.478743	30.2078	-6.17168	0.0010785	0.0248544	-0.780948	0.00927989	0.130041
Q7JZF5	Q7JZF5	Rpb5	FALSE	0	-0.0689182	-0.372491	0.234654	27.7144	-0.565336	0.59376	0.729047	-7.3086	0.272205	0.121907
Q7JZW2	Q7JZW2	RpS15	FALSE	0	-0.385947	-0.729947	-0.0419462	27.3153	-2.79385	0.0338404	0.114507	-4.62485	0.0427534	0.138142
Q7K012	Q7K012	Bap55	FALSE	0	0.0734764	-0.2244	0.371353	30.0449	0.614251	0.563162	0.707947	-7.2767	0.264327	0.119619
Q7K0D3	Q7K0D3	CG12909	FALSE	0	-0.776136	-1.08267	-0.469603	28.4526	-6.30514	0.000969417	0.0248544	-0.66048	0.00927989	0.123096
Q7K0E6	Q7K0E6	AspRS	FALSE	0	0.104112	-0.438773	0.646998	28.7515	0.47756	0.651036	0.76238	-7.35987	0.28465	0.218009
Q7K0K1	Q7K0K1	CG2063	TRUE	2	-0.391823	-0.804225	0.0205781	25.2782	-2.36595	0.058848	0.164661	-5.21467	0.0614796	0.16561
Q7K0L8	Q7K0L8	FLASH	FALSE	0	0.687728	0.334055	1.0414	27.6827	4.84227	0.00347453	0.0377106	-2.10161	0.01408	0.142026
Q7K0Y1	Q7K0Y1	CG5033	FALSE	0	-0.647085	-0.951251	-0.342918	30.958	-5.29766	0.00227299	0.0310378	-1.6231	0.0115886	0.122145
Q7K159	Q7K159	mip40	FALSE	0	-0.0196749	-0.328146	0.288796	26.3414	-0.15883	0.879377	0.927869	-7.47641	0.346439	0.123874
Q7K180	Q7K180	Map60	FALSE	0	-0.155062	-0.515938	0.205813	27.7726	-1.07	0.328573	0.494134	-6.87937	0.184495	0.144918
Q7K2D2	Q7K2D2	DCTN2-p50	FALSE	0	-0.553851	-0.852205	-0.255497	25.9736	-4.62271	0.00430507	0.0401631	-2.34281	0.0149957	0.119811
Q7K2L1	Q7K2L1	Orc3	FALSE	0	0.403733	0.0115535	0.795912	26.3652	2.56356	0.0454515	0.143053	-4.94118	0.0534118	0.157489
Q7K3D8	Q7K3D8	DMAP1	FALSE	0	0.290515	-0.0685226	0.649553	26.8718	2.01495	0.0939436	0.217364	-5.6993	0.0811571	0.14418
Q7K3M5	Q7K3M5	Dhx15	FALSE	0	-0.0608315	-0.427854	0.306191	30.834	-0.412734	0.695141	0.806988	-7.39261	0.301305	0.147387
Q7K4B2	Q7K4B2	l(2)k09848	FALSE	0	-0.438203	-0.758348	-0.118059	28.7682	-3.40851	0.0159839	0.0669255	-3.80593	0.024988	0.128562
Q7K4L8	Q7K4L8	CG7878	FALSE	0	-0.583133	-0.917723	-0.248543	29.7557	-4.34	0.00572952	0.0426285	-2.6638	0.0159162	0.134362
Q7K5M2	Q7K5M2	CG10139	FALSE	0	-0.317058	-0.680473	0.046357	29.1008	-2.17255	0.0760613	0.187575	-5.48242	0.0700349	0.145938
Q7KAH0	Q7KAH0	jim	FALSE	0	0.45847	0.0807259	0.836215	28.5531	3.02237	0.0254362	0.0908212	-4.31533	0.0339099	0.151692
Q7KHK9	Q7KHK9	Strica	FALSE	0	-0.441355	-0.782096	-0.100613	28.3038	-3.22551	0.0198641	0.0786455	-4.045	0.0293639	0.136833
Q7KK96	Q7KK96	SMC2	FALSE	0	-0.0401779	-0.486688	0.406333	27.8065	-0.224073	0.830653	0.898914	-7.46183	0.335628	0.179307
Q7KMI3	Q7KMI3	CG8878	FALSE	0	0.119224	-0.212094	0.450541	26.3861	0.896093	0.407086	0.569529	-7.05043	0.212645	0.133048
Q7KMJ6	Q7KMJ6	nito	FALSE	0	0.052115	-0.263491	0.367721	30.5195	0.4112	0.696202	0.806988	-7.39333	0.301305	0.126739
Q7KN62	Q7KN62	TER94	FALSE	0	-0.366516	-0.809487	0.0764549	29.1232	-2.0604	0.0883801	0.208248	-5.63695	0.0777536	0.177885
Q7KQM6	Q7KQM6	Gyf	FALSE	0	-1.24017	-2.01781	-0.46254	26.0888	-3.97139	0.00846382	0.0496235	-3.1003	0.0185279	0.312277
Q7KQZ4	Q7KQZ4	lola	FALSE	0	0.172221	-0.180965	0.525406	28.9449	1.21428	0.273372	0.435236	-6.72254	0.162504	0.14183
Q7KRS9	Q7KRS9	CG1815	FALSE	0	-0.976716	-1.86842	-0.0850119	25.9032	-2.72761	0.0368107	0.120665	-4.71546	0.0450528	0.358085
Q7KSE8	Q7KSE8	osa	FALSE	0	0.466734	0.162738	0.770729	28.9581	3.82328	0.00995756	0.0526594	-3.28144	0.0196615	0.122077
Q7KU01	Q7KU01	PNUTS	FALSE	0	0.527557	0.193207	0.861907	26.4682	3.92919	0.0088619	0.0496235	-3.15157	0.0185279	0.134266
Q7KVP9	Q7KVP9	Xpd	TRUE	3	0.0310319	-0.522668	0.584732	25.3799	0.139563	0.89389	0.932377	-7.47978	0.348122	0.222351
Q7KVQ0	Q7KVQ0	CG4038	FALSE	0	-0.257058	-0.563973	0.0498561	31.6374	-2.08569	0.0854336	0.20378	-5.6022	0.0760855	0.123249
Q7KY08	Q7KY08	AGO1	FALSE	0	-0.00810444	-0.620331	0.604122	26.5	-0.0329645	0.974847	0.974847	-7.49056	0.363979	0.245854
Q7PLI2	Q7PLI2	Nipped-B	FALSE	0	0.207089	-0.0972811	0.511459	28.9834	1.6943	0.144699	0.28633	-6.1307	0.106907	0.122227
Q7YZ99	Q7YZ99	Srrm234	FALSE	0	0.30831	-0.0922716	0.708891	29.7032	1.9166	0.107238	0.233934	-5.8334	0.0873439	0.160863
Q7YZA2	Q7YZA2	CG7065	FALSE	0	0.749511	0.398604	1.10042	28.6582	5.31889	0.00222987	0.0310378	-1.60148	0.0115886	0.140915
Q867Z4	Q867Z4	lola	FALSE	0	0.0439082	-0.355158	0.442975	26.3043	0.27399	0.79392	0.868537	-7.44739	0.324286	0.160255
Q86B87	Q86B87	mod(mdg4)	FALSE	0	0.242822	-0.163938	0.649582	30.4046	1.48657	0.191153	0.343088	-6.39751	0.128099	0.163344
Q86BI3	Q86BI3	Zn72D	FALSE	0	1.12471	0.110895	2.13853	26.6323	2.76259	0.0352084	0.117766	-4.66757	0.0439703	0.407122
Q86BS3	Q86BS3	Chro	FALSE	0	0.292398	-0.0331171	0.617914	30.0805	2.23686	0.0698165	0.181084	-5.3935	0.0676113	0.130718
Q86CW5	Q86CW5	Hmr	FALSE	0	0.0154188	-0.321548	0.352385	27.4438	0.113946	0.913257	0.938023	-7.48358	0.35023	0.135317
Q8I937	Q8I937	CG32409	FALSE	0	-0.213872	-0.541486	0.113743	29.9209	-1.62564	0.158694	0.2989	-6.2203	0.1116	0.131561
Q8IMF5	Q8IMF5	Map205	FALSE	0	-0.0963905	-0.513104	0.320323	28.5121	-0.576011	0.586999	0.72688	-7.30184	0.271395	0.167341
Q8IMV6	Q8IMV6	Saf-B	FALSE	0	0.858797	0.515349	1.20224	29.583	6.22679	0.00103182	0.0248544	-0.730956	0.00927989	0.13792
Q8IMX8	Q8IMX8	LSm3	TRUE	2	0.25355	-0.886564	1.39366	26.1628	0.553795	0.60112	0.733787	-7.31579	0.273974	0.45784
Q8IPL4	Q8IPL4	l(2)05714	FALSE	0	-0.24199	-0.586928	0.102948	27.1854	-1.74699	0.134786	0.269571	-6.06114	0.10065	0.138518
Q8IRJ8	Q8IRJ8	thoc7	FALSE	0	0.285744	-0.0115326	0.58302	26.7262	2.3936	0.0567444	0.162195	-5.17635	0.0605588	0.119378
Q8MLW2	Q8MLW2	dom	FALSE	0	0.108557	-0.254332	0.471445	28.824	0.744935	0.486397	0.633295	-7.18038	0.236453	0.145726
Q8MMD3	Q8MMD3	Eps-15	FALSE	0	-1.52998	-1.83103	-1.22894	27.3455	-12.6557	2.48754e-05	0.00289549	3.40965	0.00108109	0.120892
Q8MRW1	Q8MRW1	Tim23	FALSE	0	-0.025605	-0.349956	0.298746	26.169	-0.196582	0.851096	0.912578	-7.46857	0.340729	0.130251
Q8MSU4	Q8MSU4	Sym	FALSE	0	0.0664973	-0.368479	0.501474	27.5181	0.380691	0.717458	0.818026	-7.40714	0.305427	0.174675
Q8MT06	Q8MT06	Ns1	FALSE	0	-0.283188	-0.584962	0.0185868	30.0098	-2.33683	0.0611527	0.167881	-5.25503	0.0626819	0.121185
Q8MZI3	Q8MZI3	CG10077	FALSE	0	-0.089039	-0.439507	0.261429	28.7991	-0.632655	0.551907	0.702866	-7.26409	0.262429	0.140739
Q8STI6	Q8STI6	CG1142	FALSE	0	-0.753025	-1.12306	-0.382987	28.4371	-5.06754	0.00280732	0.0326772	-1.8613	0.0122007	0.148598
Q8SWR8	Q8SWR8	Atx2	FALSE	0	0.44539	0.0880271	0.802752	29.1476	3.1036	0.0230242	0.0870136	-4.20664	0.0324883	0.143507
Q8SWW4	Q8SWW4	CG16972	FALSE	0	0.4266	0.0800155	0.773185	28.5163	3.06511	0.0241341	0.0881624	-4.25804	0.0329172	0.139179
Q8SZ28	Q8SZ28	CG44250	FALSE	0	-1.46112	-1.77536	-1.14688	27.9195	-11.5788	4.02768e-05	0.00390685	2.88794	0.0014587	0.12619
Q8T076	Q8T076	Rcd1	FALSE	0	-0.03035	-0.342926	0.282226	29.1709	-0.24179	0.817555	0.887719	-7.45703	0.331448	0.125522
Q8T4A9	Q8T4A9	Rrp45	TRUE	4	-0.276706	-0.676714	0.123301	25.3857	-1.7226	0.139288	0.276674	-6.09341	0.103302	0.160633
Q8T4F7	Q8T4F7	ena	FALSE	0	-0.190509	-0.616288	0.235269	29.4518	-1.11421	0.310731	0.473417	-6.83264	0.17676	0.170981
Q94513	Q94513	BEAF-32	FALSE	0	0.150532	-0.165999	0.467064	29.5336	1.18426	0.284146	0.445749	-6.75616	0.166429	0.127111
Q94517	Q94517	HDAC1	FALSE	0	0.135085	-0.247412	0.517582	29.599	0.879454	0.41531	0.576874	-7.06564	0.215388	0.153601
Q94522	Q94522	Scsalpha1	FALSE	0	-0.510104	-0.808749	-0.21146	27.3589	-4.25343	0.00626799	0.0434282	-2.76448	0.0162148	0.119928
Q94883	Q94883	Dref	FALSE	0	0.0846256	-0.308125	0.477376	30.0383	0.536562	0.612209	0.740761	-7.32627	0.276578	0.157718
Q94901	Q94901	lark	FALSE	0	0.184463	-0.134967	0.503892	30.3176	1.43803	0.203895	0.352128	-6.45779	0.131474	0.128274
Q95RB1	Q95RB1	CG14641	FALSE	0	-0.393841	-0.838699	0.0510169	27.1886	-2.20462	0.072877	0.183612	-5.4381	0.0685554	0.178643
Q95RQ8	Q95RQ8	pita	FALSE	0	-0.0520573	-0.392794	0.288679	29.2165	-0.38045	0.717627	0.818026	-7.40724	0.305427	0.136831
Q95TS5	Q95TS5	IntS9	TRUE	3	-0.259907	-1.03112	0.511306	25.3158	-0.839226	0.43571	0.595266	-7.10151	0.222255	0.309699
Q960E4	Q960E4	CG8929	TRUE	3	0.144263	-0.210455	0.498981	25.1276	1.01276	0.352932	0.514803	-6.93801	0.192212	0.142445
Q961C3	Q961C3	CG8478	FALSE	0	0.161978	-0.145573	0.469529	28.5168	1.31151	0.240905	0.40059	-6.61036	0.149569	0.123504
Q961D1	Q961D1	CycK	FALSE	0	-0.121677	-0.800527	0.557172	27.3159	-0.446346	0.672091	0.782314	-7.37619	0.292093	0.272608
Q9I7H8	Q9I7H8	CG18766	FALSE	0	0.179015	-0.123553	0.481582	25.6973	1.47333	0.194551	0.34416	-6.41403	0.128499	0.121503
Q9I7W5	Q9I7W5	Sas10	FALSE	0	-0.419672	-0.719157	-0.120187	30.1539	-3.48956	0.0145414	0.0636325	-3.7015	0.0237585	0.120265
Q9U9Q1	Q9U9Q1	RfC38	FALSE	0	-0.51869	-0.947989	-0.0893904	28.5235	-3.00872	0.0258681	0.0913192	-4.33366	0.0340959	0.172395
Q9U9Q2	Q9U9Q2	Neos	FALSE	0	0.345762	-0.0119543	0.703479	26.5031	2.40698	0.0557547	0.162195	-5.15781	0.0605588	0.14365
Q9U9Q4	Q9U9Q4	eIF3h	FALSE	0	-0.316295	-0.629495	-0.00309506	27.2348	-2.51481	0.0484222	0.149903	-5.00854	0.0559693	0.125773
Q9V3A7	Q9V3A7	glu	FALSE	0	0.188266	-0.251822	0.628353	27.887	1.06529	0.330525	0.494238	-6.88428	0.184534	0.176727
Q9V3C0	Q9V3C0	abs	FALSE	0	0.43003	0.119231	0.740828	29.4309	3.44552	0.0153064	0.0651277	-3.75813	0.0243168	0.124809
Q9V3D6	Q9V3D6	Cpsf100	FALSE	0	0.236169	-0.122471	0.594808	27.2969	1.63983	0.155697	0.296496	-6.20189	0.110703	0.14402
Q9V3E7	Q9V3E7	Ref1	FALSE	0	-0.345564	-0.661281	-0.0298463	30.424	-2.72561	0.0369045	0.120665	-4.7182	0.0450528	0.126784
Q9V3F3	Q9V3F3	mTTF	FALSE	0	0.343424	-0.0791805	0.766028	26.3871	2.02363	0.0928536	0.216163	-5.68741	0.0807089	0.169707
Q9V3G3	Q9V3G3	cyp33	FALSE	0	-0.0133773	-0.326788	0.300034	25.22	-0.106289	0.919059	0.938407	-7.48457	0.350373	0.125858
Q9V3H9	Q9V3H9	Nab2	FALSE	0	0.692118	0.281069	1.10317	27.7813	4.19297	0.00667817	0.0436707	-2.83546	0.0163054	0.165066
Q9V3P3	Q9V3P3	REG	FALSE	0	0.623764	0.259503	0.988025	28.9023	4.26425	0.00619767	0.0434282	-2.75184	0.0162148	0.146278
Q9V3T8	Q9V3T8	SC35	FALSE	0	-0.585558	-0.924159	-0.246957	26.2235	-4.30642	0.00593191	0.0426285	-2.70272	0.0159162	0.135973
Q9V3W7	Q9V3W7	SF2	FALSE	0	-0.0265525	-0.342565	0.28946	30.9721	-0.209235	0.84167	0.907133	-7.46558	0.338696	0.126902
Q9V3Y5	Q9V3Y5	CG4119	FALSE	0	0.47758	0.168938	0.786221	28.5683	3.85325	0.00963283	0.0523954	-3.24453	0.0195629	0.123942
Q9V405	Q9V405	Rpt3	FALSE	0	-0.822517	-1.34874	-0.296298	26.9022	-3.89236	0.00922675	0.0511426	-3.19655	0.0190951	0.211316
Q9V406	Q9V406	crp	FALSE	0	0.00510509	-0.326058	0.336268	29.7213	0.038388	0.97071	0.974058	-7.49033	0.363684	0.132986
Q9V455	Q9V455	Kap-alpha3	FALSE	0	-0.241323	-0.56074	0.0780948	28.6885	-1.88137	0.112452	0.241502	-5.88111	0.0901696	0.12827
Q9V460	Q9V460	Spt5	FALSE	0	0.00758505	-0.309874	0.325044	29.7567	0.0594984	0.954622	0.965588	-7.48912	0.360522	0.127483
Q9V468	Q9V468	CG9776	FALSE	0	0.254749	-0.0996079	0.609107	29.6475	1.79022	0.127156	0.263362	-6.0036	0.0983317	0.142301
Q9V493	Q9V493	CG11076	FALSE	0	-0.610887	-0.964872	-0.256902	27.6962	-4.29745	0.00598735	0.0426285	-2.71315	0.0159162	0.142151
Q9V4C8	Q9V4C8	Hcf	FALSE	0	0.0985913	-0.201891	0.399073	30.6334	0.817062	0.447263	0.602563	-7.12072	0.224979	0.120666
Q9V4D4	Q9V4D4	bip2	FALSE	0	0.0233955	-0.352608	0.399399	26.9435	0.154944	0.8823	0.928569	-7.47712	0.3467	0.150993
Q9V4Q8	Q9V4Q8	U2A	FALSE	0	0.0822105	-0.247485	0.411906	28.628	0.62094	0.559055	0.707326	-7.27215	0.264095	0.132397
Q9V535	Q9V535	tsu	FALSE	0	0.336679	-0.0165651	0.689923	27.2498	2.37343	0.0582709	0.163834	-5.20431	0.0611708	0.141853
Q9V5P6	Q9V5P6	CG7637	FALSE	0	-0.382617	-0.710629	-0.0546055	29.0211	-2.90476	0.0294343	0.101365	-4.47399	0.0378469	0.131721
Q9V6Q2	Q9V6Q2	cid	FALSE	0	-3.03768	-3.49348	-2.58189	27.2612	-16.5962	5.64748e-06	0.000821709	4.96572	0.000306802	0.183034
Q9V726	Q9V726	Cpsf160	FALSE	0	0.0200379	-0.438117	0.478193	27.5999	0.108912	0.917071	0.938023	-7.48424	0.35023	0.183983
Q9V8R9	Q9V8R9	cora	FALSE	0	-1.01949	-1.58829	-0.450691	26.9924	-4.46333	0.00505077	0.0404323	-2.52231	0.0150962	0.228414
Q9V8V8	Q9V8V8	par-1	FALSE	0	0.0729442	-0.229853	0.375742	27.2341	0.599893	0.572042	0.711386	-7.2863	0.26561	0.121595
Q9V9K7	Q9V9K7	Ars2	FALSE	0	-0.0456544	-0.354339	0.26303	29.1973	-0.368301	0.726173	0.820646	-7.41246	0.306405	0.12396
Q9V9T4	Q9V9T4	Acf	FALSE	0	-0.389564	-0.923783	0.144655	28.1165	-1.81591	0.122827	0.25579	-5.96923	0.0955045	0.214528
Q9V9U9	Q9V9U9	CG11563	TRUE	2	-1.58678	-2.62178	-0.551775	26.3824	-3.81777	0.0100186	0.0526594	-3.28825	0.0196615	0.415629
Q9V9V0	Q9V9V0	CstF50	TRUE	2	0.207894	-0.22479	0.640578	24.9701	1.19648	0.279716	0.439986	-6.74253	0.164278	0.173754
Q9V9Z9	Q9V9Z9	CG1542	FALSE	0	-0.670933	-0.99427	-0.347597	29.1479	-5.16725	0.00255982	0.0310378	-1.7572	0.0115886	0.129843
Q9VA18	Q9VA18	Chchd3	FALSE	0	-0.774849	-1.13853	-0.41117	28.8772	-5.30559	0.00225677	0.0310378	-1.61502	0.0115886	0.146044
Q9VAA9	Q9VAA9	Jasper	FALSE	0	-0.762192	-1.20265	-0.321731	29.3168	-4.30916	0.00591511	0.0426285	-2.69954	0.0159162	0.176877
Q9VAC4	Q9VAC4	Nph	FALSE	0	-0.293618	-0.623619	0.0363827	27.0788	-2.21566	0.0718138	0.182514	-5.42284	0.0681452	0.13252
Q9VAC9	Q9VAC9	CG7903	FALSE	0	0.717196	0.413688	1.0207	26.5662	5.88441	0.00136519	0.0256304	-1.0473	0.00956963	0.121881
Q9VAJ1	Q9VAJ1	Cap-D2	FALSE	0	-0.367657	-0.855116	0.119803	27.438	-1.87819	0.112935	0.241649	-5.88541	0.0902244	0.195751
Q9VAW5	Q9VAW5	larp	FALSE	0	-0.641281	-0.959829	-0.322733	29.2816	-5.01313	0.00295392	0.0337095	-1.9187	0.0125861	0.12792
Q9VAX8	Q9VAX8	CG4849	FALSE	0	-0.0212871	-0.319358	0.276784	30.8166	-0.177841	0.865108	0.91968	-7.47267	0.343381	0.119698
Q9VAY6	Q9VAY6	BCAS2	FALSE	0	0.0226471	-0.27862	0.323915	27.6229	0.187196	0.858106	0.918048	-7.47068	0.342772	0.120981
Q9VB04	Q9VB04	btz	TRUE	2	-0.503369	-0.888564	-0.118174	25.2546	-3.25417	0.0191927	0.0770354	-4.00726	0.0287627	0.154684
Q9VB52	Q9VB52	l(3)mbt	FALSE	0	0.396332	0.0784766	0.714188	26.7955	3.10502	0.0229844	0.0870136	-4.20475	0.0324883	0.127642
Q9VBK9	Q9VBK9	CG5913	TRUE	1	0.758073	0.0319174	1.48423	25.3547	2.59966	0.0433783	0.137957	-4.89138	0.0515091	0.291605
Q9VBP5	Q9VBP5	jigr1	FALSE	0	-0.0644134	-0.392272	0.263445	27.6787	-0.489243	0.643244	0.756401	-7.3535	0.282418	0.131659
Q9VBX3	Q9VBX3	vig2	FALSE	0	-0.194926	-0.69937	0.309519	26.7876	-0.962255	0.375626	0.53582	-6.98789	0.200059	0.202572
Q9VBX4	Q9VBX4	CG31510	FALSE	0	0.716301	0.250861	1.18174	27.3321	3.83237	0.00985783	0.0526594	-3.27024	0.0196615	0.186908
Q9VBY2	Q9VBY2	CG11920	FALSE	0	-0.31065	-0.622143	0.000842784	28.5785	-2.48347	0.0504415	0.152901	-5.0519	0.0570886	0.125087
Q9VBY6	Q9VBY6	PQBP1	TRUE	2	-0.182903	-0.779971	0.414164	25.4539	-0.762839	0.476464	0.624596	-7.16598	0.233206	0.239767
Q9VBZ5	Q9VBZ5	Ythdf	FALSE	0	-0.225498	-0.659593	0.208596	26.2643	-1.29358	0.24662	0.407763	-6.63141	0.152247	0.174321
Q9VC28	Q9VC28	CG7006	FALSE	0	-0.489458	-0.81123	-0.167686	29.3551	-3.78793	0.0103566	0.0526594	-3.32517	0.0196615	0.129215
Q9VC36	Q9VC36	polybromo	FALSE	0	0.0515067	-0.270523	0.373536	29.5287	0.398293	0.705158	0.812131	-7.3993	0.303226	0.129319
Q9VC49	Q9VC49	Rpb10	FALSE	0	-0.298855	-0.610276	0.0125665	26.1528	-2.38972	0.0570346	0.162195	-5.18173	0.0605588	0.125059
Q9VC54	Q9VC54	CG6695	TRUE	2	0.768813	0.338192	1.19943	25.5938	4.44591	0.00514087	0.0404323	-2.54216	0.0150962	0.172926
Q9VC96	Q9VC96	BRWD3	FALSE	0	0.0665642	-0.247519	0.380648	28.8339	0.527753	0.617922	0.743715	-7.33151	0.277681	0.126128
Q9VCD8	Q9VCD8	SMC1	FALSE	0	-0.19185	-0.88871	0.505009	28.0054	-0.68557	0.520348	0.667054	-7.22607	0.249058	0.27984
Q9VCK0	Q9VCK0	eIF3d1	FALSE	0	-0.528637	-1.02855	-0.0287186	28.3622	-2.63326	0.0415394	0.132835	-4.84509	0.0495966	0.200754
Q9VCU6	Q9VCU6	HP1c	FALSE	0	0.331353	-0.14	0.802706	26.5301	1.75057	0.134137	0.269199	-6.05639	0.100511	0.189283
Q9VD26	Q9VD26	CG5382	FALSE	0	-0.758753	-1.57226	0.0547579	26.6921	-2.32259	0.0623144	0.170268	-5.27476	0.0635729	0.326684
Q9VD52	Q9VD52	CG6015	FALSE	0	0.313591	-0.221773	0.848956	27.5909	1.45864	0.19839	0.346209	-6.4323	0.129264	0.214988
Q9VDE5	Q9VDE5	ppan	FALSE	0	-0.287427	-0.592396	0.0175419	30.4557	-2.34697	0.0603396	0.167227	-5.24098	0.0624376	0.122467
Q9VDL2	Q9VDL2	TFAM	TRUE	2	0.589608	-0.0754398	1.25466	25.1379	2.20773	0.0725764	0.183612	-5.43381	0.0685554	0.267066
Q9VDN4	Q9VDN4	CG4360	FALSE	0	0.27423	-0.082178	0.630638	27.7817	1.91603	0.10732	0.233934	-5.83417	0.0873439	0.143124
Q9VDQ3	Q9VDQ3	CG4936	FALSE	0	0.0186557	-0.317039	0.354351	26.1125	0.138389	0.894776	0.932377	-7.47997	0.348122	0.134806
Q9VDS6	Q9VDS6	Surf6	FALSE	0	-0.18911	-0.502474	0.124254	29.5854	-1.5028	0.187062	0.338107	-6.37717	0.126239	0.125839
Q9VDY1	Q9VDY1	Ino80	FALSE	0	0.547502	0.182863	0.912141	26.5434	3.73902	0.0109387	0.0544132	-3.38597	0.0203163	0.146429
Q9VE17	Q9VE17	snRNP-U1-C	FALSE	0	0.0580184	-0.347582	0.463619	26.2116	0.356206	0.734724	0.8287	-7.41749	0.309412	0.162879
Q9VE51	Q9VE51	Cpsf73	FALSE	0	0.092552	-0.295173	0.480277	26.2688	0.594425	0.575446	0.714093	-7.28991	0.266621	0.1557
Q9VE52	Q9VE52	CstF64	FALSE	0	0.375227	-0.099153	0.849608	26.9898	1.96971	0.0998363	0.22348	-5.76113	0.0834407	0.190499
Q9VE94	Q9VE94	CG18600	TRUE	2	-1.09817	-1.50601	-0.690336	25.8598	-6.70528	0.000711506	0.0230053	-0.311167	0.00858951	0.163778
Q9VEA5	Q9VEA5	Rpb4	FALSE	0	0.0824576	-0.279338	0.444253	26.8995	0.567548	0.592356	0.72886	-7.30721	0.272135	0.145288
Q9VEF0	Q9VEF0	Odj	FALSE	0	0.0367023	-0.541949	0.615354	25.9493	0.157947	0.880041	0.927869	-7.47657	0.346439	0.232371
Q9VEJ0	Q9VEJ0	Prx3	TRUE	4	-0.235956	-0.638748	0.166836	24.878	-1.45876	0.198358	0.346209	-6.43215	0.129264	0.161751
Q9VEJ1	Q9VEJ1	SF1	FALSE	0	-0.0322631	-0.35917	0.294644	27.1507	-0.245763	0.814627	0.887719	-7.4559	0.331448	0.131277
Q9VEL2	Q9VEL2	Brf	FALSE	0	0.125138	-0.683654	0.933931	27.5785	0.38529	0.714235	0.818026	-7.40512	0.305427	0.32479
Q9VEN1	Q9VEN1	cher	FALSE	0	-0.341144	-0.878839	0.196551	26.7214	-1.57992	0.168732	0.313745	-6.27924	0.117143	0.215924
Q9VEP0	Q9VEP0	CG3995	FALSE	0	0.235257	-0.11755	0.588064	28.4093	1.66051	0.15143	0.291828	-6.17496	0.10896	0.141678
Q9VEP9	Q9VEP9	Sf3a1	FALSE	0	0.283623	-0.090686	0.657933	25.6893	1.88689	0.111619	0.2406	-5.87365	0.089833	0.150313
Q9VEX5	Q9VEX5	asun	FALSE	0	0.371662	-0.194731	0.938054	26.4288	1.63405	0.156912	0.297469	-6.2094	0.111066	0.227448
Q9VEY5	Q9VEY5	CG5903	FALSE	0	-0.139589	-0.776468	0.49729	27.8109	-0.545794	0.606255	0.735084	-7.32069	0.274458	0.255754
Q9VEZ8	Q9VEZ8	pnr	FALSE	0	0.043648	-0.338066	0.425362	26.4731	0.284748	0.786076	0.864832	-7.4439	0.322903	0.153286
Q9VF56	Q9VF56	obe	FALSE	0	0.131364	-0.402019	0.664748	25.7361	0.613299	0.563749	0.707947	-7.27734	0.264327	0.214193
Q9VFB5	Q9VFB5	Rpb7	FALSE	0	0.364535	-0.0501662	0.779236	26.7184	2.18896	0.0744141	0.185081	-5.45975	0.0691039	0.166533
Q9VFE6	Q9VFE6	CG3817	FALSE	0	-1.26762	-2.10189	-0.433356	27.1699	-3.78373	0.0104052	0.0526594	-3.33037	0.0196615	0.335019
Q9VFS6	Q9VFS6	omd	FALSE	0	0.0229015	-0.437802	0.483605	26.3585	0.123788	0.905808	0.934912	-7.48221	0.349068	0.185006
Q9VFT4	Q9VFT4	rin	FALSE	0	0.724434	0.343591	1.10528	30.9979	4.73683	0.00384806	0.0399601	-2.21657	0.0149199	0.152936
Q9VFV9	Q9VFV9	Droj2	FALSE	0	0.108371	-0.18872	0.405463	30.4531	0.908361	0.401104	0.56387	-7.03908	0.210532	0.119304
Q9VG58	Q9VG58	Hsp70Bbb	FALSE	0	0.131138	-0.179199	0.441475	28.3076	1.05228	0.335963	0.496926	-6.89776	0.185538	0.124623
Q9VG78	Q9VG78	pps	FALSE	0	0.206941	-0.14662	0.560502	27.9164	1.45753	0.198684	0.346209	-6.43368	0.129264	0.141981
Q9VG84	Q9VG84	DNAlig3	FALSE	0	-0.264163	-0.682635	0.154309	28.078	-1.57195	0.170544	0.3151	-6.28944	0.117649	0.168047
Q9VGA4	Q9VGA4	MBD-R2	FALSE	0	-0.0344165	-0.346627	0.277794	29.7723	-0.274507	0.793542	0.868537	-7.44722	0.324286	0.125376
Q9VGH5	Q9VGH5	glo	FALSE	0	0.876591	0.489876	1.26331	28.3359	5.6447	0.00167331	0.0291653	-1.27722	0.0108894	0.155294
Q9VGI8	Q9VGI8	Blm	FALSE	0	0.199777	-0.768188	1.16774	25.2929	0.51395	0.626934	0.746167	-7.33957	0.278597	0.388709
Q9VGL0	Q9VGL0	CG14712	FALSE	0	0.290341	-0.119346	0.700027	28.0487	1.76478	0.131592	0.268633	-6.03751	0.100299	0.164519
Q9VGL2	Q9VGL2	CG14711	TRUE	2	0.233163	-0.0649768	0.531304	24.9677	1.94749	0.102868	0.22764	-5.79141	0.0849939	0.119725
Q9VGN9	Q9VGN9	RpL24-like	FALSE	0	-0.487322	-0.807641	-0.167003	28.656	-3.78851	0.0103499	0.0526594	-3.32445	0.0196615	0.128632
Q9VH07	Q9VH07	pont	FALSE	0	0.102394	-0.346817	0.551605	28.7679	0.567622	0.592309	0.72886	-7.30716	0.272135	0.180391
Q9VH84	Q9VH84	Pnn	FALSE	0	0.16849	-0.189372	0.526351	27.6982	1.17245	0.288488	0.450135	-6.76926	0.168067	0.143708
Q9VHC7	Q9VHC7	rump	FALSE	0	0.529	0.227874	0.830125	31.8482	4.37464	0.00552892	0.0425099	-2.62383	0.0158719	0.120924
Q9VHG6	Q9VHG6	Ibf2	FALSE	0	-0.205159	-0.611429	0.201112	28.5698	-1.25751	0.258487	0.422582	-6.67326	0.15778	0.163147
Q9VHH8	Q9VHH8	beag	TRUE	1	1.60863	0.708957	2.50831	26.5999	4.45252	0.00510648	0.0404323	-2.53463	0.0150962	0.361287
Q9VHI1	Q9VHI1	hyx	FALSE	0	0.127688	-0.48491	0.740285	26.5314	0.519049	0.623596	0.743715	-7.33661	0.277681	0.246003
Q9VHM3	Q9VHM3	M1BP	FALSE	0	0.113356	-0.248292	0.475004	29.7051	0.780537	0.466788	0.620252	-7.15148	0.231584	0.145228
Q9VHP0	Q9VHP0	bel	FALSE	0	-0.504048	-0.843752	-0.164344	32.4408	-3.69493	0.0114951	0.0552907	-3.44108	0.0206439	0.136416
Q9VHP9	Q9VHP9	Cenp-C	FALSE	0	-0.34911	-0.707632	0.00941072	28.8687	-2.42484	0.0544633	0.162195	-5.13307	0.0605588	0.143973
Q9VHT2	Q9VHT2	tex	FALSE	0	0.225446	-0.151524	0.602415	26.7377	1.48926	0.190468	0.343088	-6.39414	0.128099	0.151381
Q9VI18	Q9VI18	CG1024	FALSE	0	0.182718	-0.189798	0.555235	27.2685	1.22144	0.270856	0.434201	-6.71445	0.162118	0.149593
Q9VI54	Q9VI54	CG1965	TRUE	2	0.495895	-0.732981	1.72477	24.5919	1.00489	0.356396	0.517263	-6.9459	0.193131	0.493484
Q9VI58	Q9VI58	Tailor	FALSE	0	-0.173978	-0.696539	0.348583	27.1623	-0.829071	0.440976	0.599628	-7.11036	0.223883	0.209847
Q9VID9	Q9VID9	CG8677	FALSE	0	0.742846	0.327911	1.15778	27.9933	4.45814	0.00507744	0.0404323	-2.52822	0.0150962	0.166627
Q9VIH1	Q9VIH1	RPA2	FALSE	0	0.0774019	-0.23926	0.394064	27.5884	0.608683	0.566596	0.709159	-7.28045	0.264779	0.127163
Q9VIP9	Q9VIP9	barr	FALSE	0	-0.0160554	-0.345207	0.313096	26.7334	-0.121468	0.907563	0.934912	-7.48254	0.349068	0.132179
Q9VIW3	Q9VIW3	RanGAP	FALSE	0	-0.139799	-0.500899	0.221301	30.7987	-0.964077	0.374788	0.53582	-6.98612	0.200059	0.145008
Q9VIW7	Q9VIW7	RtcB	FALSE	0	0.674865	-0.0298444	1.37957	26.6953	2.38474	0.0574092	0.162195	-5.18862	0.0605588	0.282993
Q9VIZ3	Q9VIZ3	l(2)37Cb	TRUE	2	0.739752	0.182606	1.2969	25.3349	3.30637	0.0180336	0.0739124	-3.93881	0.0275967	0.223735
Q9VJG2	Q9VJG2	CG12288	FALSE	0	-1.21899	-1.86217	-0.575805	27.9531	-4.71954	0.00391362	0.0399601	-2.23558	0.0149199	0.258286
Q9VJH2	Q9VJH2	AspRS-m	FALSE	0	-0.809446	-1.44916	-0.169731	27.705	-3.15091	0.0217363	0.0843368	-4.14369	0.0314888	0.256893
Q9VJI6	Q9VJI6	BuGZ	TRUE	3	0.405171	-0.280831	1.09117	25.2214	1.47078	0.195213	0.344285	-6.41722	0.128546	0.27548
Q9VK18	Q9VK18	CG16812	FALSE	0	0.236543	-0.0631451	0.536231	27.3802	1.96551	0.100402	0.223886	-5.76686	0.0835922	0.120347
Q9VK58	Q9VK58	Pih1D1	FALSE	0	1.25223	0.396271	2.1082	27.1403	3.64305	0.0121908	0.0573369	-3.50628	0.0214079	0.343732
Q9VK59	Q9VK59	CG5787	FALSE	0	0.333566	0.0258906	0.641241	32.2811	2.69975	0.0381433	0.12333	-4.75367	0.0460478	0.123554
Q9VKC1	Q9VKC1	RpL7-like	FALSE	0	-0.659765	-0.961626	-0.357903	29.7174	-5.44272	0.00199639	0.0310378	-1.47661	0.0115886	0.12122
Q9VKD8	Q9VKD8	CG6686	FALSE	0	0.105688	-0.19697	0.408347	28.1537	0.869579	0.42025	0.581023	-7.07457	0.216937	0.12154
Q9VKM2	Q9VKM2	SCAR	FALSE	0	-0.512363	-0.847616	-0.17711	26.8511	-3.80575	0.0101533	0.0526594	-3.3031	0.0196615	0.134629
Q9VKM7	Q9VKM7	CG33129	FALSE	0	-0.51232	-0.816185	-0.208455	28.8441	-4.19851	0.00663931	0.0436707	-2.82893	0.0163054	0.122024
Q9VKN7	Q9VKN7	aurB	FALSE	0	-0.278613	-0.691274	0.134048	26.7539	-1.68129	0.147255	0.28856	-6.14777	0.10774	0.165714
Q9VKW3	Q9VKW3	RfC3	FALSE	0	-0.163704	-0.70447	0.377062	29.0511	-0.753852	0.481432	0.629147	-7.17324	0.234905	0.217157
Q9VL91	Q9VL91	zf30C	FALSE	0	-0.00869618	-0.356892	0.3395	28.772	-0.0621928	0.95257	0.965588	-7.48893	0.360522	0.139826
Q9VLD6	Q9VLD6	borr	FALSE	0	-0.130899	-0.524232	0.262434	26.8185	-0.828723	0.441157	0.599628	-7.11067	0.223883	0.157952
Q9VLK1	Q9VLK1	CG13097	FALSE	0	-0.552345	-0.879822	-0.224869	28.2879	-4.20016	0.00662783	0.0436707	-2.82699	0.0163054	0.131506
Q9VLK8	Q9VLK8	prg	FALSE	0	0.110258	-0.21596	0.436476	26.9819	0.84166	0.434455	0.59522	-7.09938	0.222238	0.131001
Q9VLL1	Q9VLL1	D12	TRUE	1	-0.0530786	-0.78539	0.679233	25.9043	-0.180492	0.863122	0.91968	-7.47211	0.343381	0.294077
Q9VLV5	Q9VLV5	SmE	FALSE	0	-0.117391	-0.630003	0.395221	26.628	-0.570271	0.590629	0.72886	-7.30549	0.272135	0.205851
Q9VLX2	Q9VLX2	CG7154	FALSE	0	-0.106482	-0.614019	0.401055	26.7123	-0.52245	0.621376	0.743715	-7.33463	0.277681	0.203813
Q9VM17	Q9VM17	CG5181	FALSE	0	-0.235911	-0.559672	0.0878506	25.8172	-1.8145	0.123061	0.25579	-5.97112	0.0955045	0.130014
Q9VM62	Q9VM62	SA	FALSE	0	-0.139116	-0.463582	0.18535	29.5089	-1.06768	0.329531	0.494238	-6.88179	0.184534	0.130297
Q9VM95	Q9VM95	Aatf	FALSE	0	-0.406959	-0.709644	-0.104274	28.6108	-3.34807	0.0171636	0.0708453	-3.88439	0.0264515	0.12155
Q9VMC8	Q9VMC8	Phf5a	FALSE	0	0.310044	-0.00416323	0.624251	26.0598	2.45721	0.0522022	0.156607	-5.08825	0.0584722	0.126177
Q9VMJ1	Q9VMJ1	CG9107	FALSE	0	-0.145776	-0.487053	0.195501	27.5014	-1.06369	0.331191	0.494238	-6.88595	0.184534	0.137048
Q9VMM3	Q9VMM3	CG7239	FALSE	0	-0.0563143	-0.400533	0.287905	28.6746	-0.407398	0.698835	0.806988	-7.39511	0.301305	0.138229
Q9VMM7	Q9VMM7	CG11030	FALSE	0	-0.515365	-0.882699	-0.148031	27.9097	-3.49372	0.0144713	0.0636325	-3.69616	0.0237585	0.147512
Q9VMV5	Q9VMV5	vkg	FALSE	0	0.220159	-0.538178	0.978495	27.2267	0.722951	0.498788	0.646536	-7.19767	0.241397	0.304528
Q9VMX3	Q9VMX3	CG3756	FALSE	0	-0.459987	-0.779123	-0.140851	28.6864	-3.58926	0.0129624	0.0584816	-3.57431	0.0218353	0.128156
Q9VN31	Q9VN31	Fip1	FALSE	0	-0.0440626	-0.890727	0.802602	26.4091	-0.129597	0.901416	0.934912	-7.48135	0.349068	0.339998
Q9VN50	Q9VN50	eIF3f1	FALSE	0	-0.326087	-0.648722	-0.00345338	27.0235	-2.51686	0.0482934	0.149903	-5.00572	0.0559693	0.129561
Q9VN55	Q9VN55	atms	FALSE	0	-0.148384	-0.461572	0.164805	27.253	-1.17982	0.285773	0.447097	-6.7611	0.166933	0.125768
Q9VN88	Q9VN88	Vps37B	TRUE	1	-0.0165689	-0.392625	0.359487	25.1502	-0.109718	0.91646	0.938023	-7.48413	0.35023	0.151014
Q9VNA3	Q9VNA3	CG11999	FALSE	0	0.19727	-0.155579	0.550118	27.4507	1.39221	0.216647	0.369761	-6.51383	0.138058	0.141695
Q9VNE0	Q9VNE0	CG2926	FALSE	0	0.0473146	-0.31125	0.405879	27.5537	0.328596	0.754403	0.839508	-7.42837	0.313447	0.14399
Q9VNF7	Q9VNF7	MTA1-like	FALSE	0	0.147259	-0.153462	0.44798	28.068	1.21942	0.271562	0.434201	-6.71673	0.162118	0.120762
Q9VNG2	Q9VNG2	Wdr33	FALSE	0	0.278136	-0.0767254	0.632997	26.2594	1.95179	0.102274	0.227188	-5.78555	0.0848254	0.142503
Q9VNI8	Q9VNI8	Hpr1	FALSE	0	0.249435	-0.103632	0.602502	28.5683	1.75928	0.132572	0.268633	-6.04482	0.100299	0.141782
Q9VNP3	Q9VNP3	Mes2	FALSE	0	0.297998	-0.028607	0.624602	28.4936	2.27209	0.0666246	0.176602	-5.34472	0.0659379	0.131156
Q9VNV3	Q9VNV3	Ddx1	TRUE	2	-0.046656	-0.943038	0.849726	24.8509	-0.129613	0.901403	0.934912	-7.48134	0.349068	0.359963
Q9VNZ3	Q9VNZ3	Rpb8	FALSE	0	-0.200647	-0.500554	0.0992593	28.6672	-1.66603	0.15031	0.29146	-6.16775	0.108823	0.120435
Q9VP57	Q9VP57	pzg	FALSE	0	0.164108	-0.139864	0.46808	31.1017	1.34441	0.230733	0.386994	-6.57137	0.144492	0.122067
Q9VPC0	Q9VPC0	Pitslre	FALSE	0	-0.272598	-0.585809	0.0406136	28.6147	-2.1673	0.0765964	0.188097	-5.48968	0.07023	0.125777
Q9VPL0	Q9VPL0	CG3436	FALSE	0	-0.0873077	-0.397451	0.222836	27.6117	-0.701011	0.511368	0.659902	-7.21449	0.246388	0.124545
Q9VPM5	Q9VPM5	mbm	FALSE	0	-0.636393	-0.942166	-0.330619	28.6075	-5.18275	0.00252364	0.0310378	-1.74115	0.0115886	0.122791
Q9VPR5	Q9VPR5	Sf3b1	FALSE	0	0.0536405	-0.335241	0.442522	29.5338	0.343487	0.743763	0.835657	-7.4226	0.312009	0.156165
Q9VPU8	Q9VPU8	dbe	FALSE	0	-0.199988	-0.563243	0.163268	27.2144	-1.37096	0.222808	0.376959	-6.53953	0.140745	0.145874
Q9VPY0	Q9VPY0	IntS14	TRUE	3	0.388621	0.0761248	0.701117	25.5542	3.09682	0.0232155	0.0871706	-4.21568	0.0325469	0.12549
Q9VPY4	Q9VPY4	CG4887	FALSE	0	0.101852	-0.275748	0.479452	26.7945	0.671696	0.528506	0.676023	-7.23629	0.252407	0.151634
Q9VQ27	Q9VQ27	CG14352	TRUE	2	-0.56275	-1.24198	0.116483	25.784	-2.06315	0.0880547	0.208248	-5.63318	0.0777536	0.272762
Q9VQ58	Q9VQ58	CG15356	FALSE	0	-0.0231584	-0.349503	0.303186	28.0766	-0.176713	0.865953	0.91968	-7.4729	0.343381	0.131051
Q9VQI6	Q9VQI6	CG8814	FALSE	0	-0.138342	-0.575574	0.298891	27.4829	-0.787908	0.462799	0.617773	-7.14537	0.230658	0.175581
Q9VQJ6	Q9VQJ6	CG9641	FALSE	0	-0.0491259	-0.348487	0.250236	26.6724	-0.408648	0.697968	0.806988	-7.39453	0.301305	0.120216
Q9VQK5	Q9VQK5	CG3542	FALSE	0	0.777687	0.291537	1.26384	26.7101	3.98354	0.00835295	0.0496063	-3.08559	0.0185215	0.195225
Q9VQK7	Q9VQK7	Sf3b2	FALSE	0	0.280731	-0.204493	0.765955	26.2202	1.44073	0.203166	0.351912	-6.45445	0.131393	0.194853
Q9VR99	Q9VR99	cactin	FALSE	0	-0.269851	-0.591905	0.0522018	28.0306	-2.08656	0.0853333	0.20378	-5.60099	0.0760855	0.129328
Q9VRJ4	Q9VRJ4	CG10672	FALSE	0	-0.0634568	-0.490924	0.36401	25.112	-0.369667	0.72521	0.820646	-7.41188	0.306405	0.17166
Q9VRV4	Q9VRV4	D19B	FALSE	0	0.733346	0.386991	1.0797	27.0341	5.27258	0.00232517	0.0310378	-1.64872	0.0115886	0.139087
Q9VRV5	Q9VRV5	D19A	FALSE	0	0.636639	0.334834	0.938445	28.006	5.25293	0.002367	0.0310378	-1.66884	0.0115886	0.121197
Q9VRV7	Q9VRV7	Sf3b6	TRUE	1	-0.273156	-0.788041	0.241728	25.956	-1.3211	0.237899	0.396725	-6.59905	0.148125	0.206764
Q9VRX7	Q9VRX7	Rexo5	FALSE	0	-0.347151	-0.878704	0.184401	28.3588	-1.62633	0.158548	0.2989	-6.21942	0.1116	0.213457
Q9VS55	Q9VS55	CTCF	FALSE	0	0.131934	-0.207542	0.47141	26.5481	0.967794	0.373082	0.534812	-6.98251	0.199683	0.136325
Q9VSW5	Q9VSW5	Klp67A	FALSE	0	-1.15177	-1.54046	-0.76309	26.557	-7.37913	0.000436533	0.0178907	0.239717	0.00667985	0.156085
Q9VT19	Q9VT19	CG3335	FALSE	0	-0.286418	-0.736523	0.163688	26.6086	-1.5846	0.167678	0.313318	-6.27323	0.116984	0.180751
Q9VT61	Q9VT61	CG8108	FALSE	0	0.48771	0.188673	0.786748	30.6546	4.06136	0.00768059	0.0476097	-2.99187	0.017776	0.120086
Q9VTC1	Q9VTC1	CG6418	TRUE	1	0.762253	0.352335	1.17217	25.8793	4.6306	0.00427154	0.0401631	-2.33402	0.0149957	0.164612
Q9VTT2	Q9VTT2	vers	FALSE	0	-0.0328846	-0.339858	0.274089	27.6028	-0.266764	0.799204	0.872677	-7.44965	0.325832	0.123272
Q9VTT3	Q9VTT3	ssp	FALSE	0	0.141314	-0.174427	0.457056	26.1852	1.11452	0.310608	0.473417	-6.8323	0.17676	0.126793
Q9VTU4	Q9VTU4	eIF3l	FALSE	0	-0.184019	-0.608241	0.240204	28.1156	-1.0802	0.324383	0.490366	-6.8687	0.183088	0.170357
Q9VTZ0	Q9VTZ0	tral	FALSE	0	-0.0680853	-0.42252	0.28635	28.8054	-0.478356	0.650503	0.76238	-7.35944	0.28465	0.142332
Q9VU02	Q9VU02	SmD1	FALSE	0	0.226353	-0.11228	0.564987	28.9233	1.66453	0.150613	0.29146	-6.1697	0.108823	0.135986
Q9VUB5	Q9VUB5	upSET	FALSE	0	0.409221	-0.394079	1.21252	25.8736	1.26857	0.254793	0.41852	-6.66049	0.156263	0.322584
Q9VUC3	Q9VUC3	CG6833	FALSE	0	-0.643906	-0.991516	-0.296296	26.0224	-4.61281	0.00434755	0.0401631	-2.35385	0.0149957	0.139591
Q9VUE5	Q9VUE5	stwl	FALSE	0	-0.041571	-0.353138	0.269996	29.8322	-0.332256	0.751782	0.838194	-7.42697	0.312957	0.125117
Q9VUH8	Q9VUH8	Tdrd3	FALSE	0	0.0103268	-0.448943	0.469597	25.1198	0.0559928	0.957292	0.965588	-7.48936	0.360522	0.184431
Q9VUQ5	Q9VUQ5	AGO2	FALSE	0	0.73745	0.417401	1.0575	30.8474	5.73787	0.00154488	0.0280976	-1.18701	0.0104908	0.128523
Q9VUR2	Q9VUR2	CG12301	FALSE	0	-0.215508	-0.572592	0.141576	30.5881	-1.50289	0.187039	0.338107	-6.37705	0.126239	0.143396
Q9VV75	Q9VV75	UQCR-C2	FALSE	0	-0.0216469	-0.352148	0.308854	28.5371	-0.163102	0.876166	0.927143	-7.47561	0.346168	0.132721
Q9VVH5	Q9VVH5	UQCR-Q	FALSE	0	-0.0266679	-0.473154	0.419819	26.6176	-0.148736	0.886974	0.930125	-7.47823	0.347281	0.179297
Q9VVI0	Q9VVI0	U4-U6-60K	FALSE	0	0.0136082	-0.289725	0.316941	27.9006	0.111716	0.914946	0.938023	-7.48387	0.35023	0.121811
Q9VVI1	Q9VVI1	CG7564	FALSE	0	-0.742529	-1.59114	0.106083	25.8896	-2.17891	0.075419	0.186782	-5.47364	0.069739	0.34078
Q9VVK8	Q9VVK8	CG5589	FALSE	0	-0.482678	-1.00626	0.0409043	27.4702	-2.29566	0.064575	0.172397	-5.31207	0.0643681	0.210257
Q9VVU2	Q9VVU2	RpL26	FALSE	0	-0.41515	-0.715858	-0.114443	29.2826	-3.43793	0.0154427	0.0651277	-3.76792	0.0243168	0.120756
Q9VVU6	Q9VVU6	CG6841	FALSE	0	0.145494	-0.22225	0.513239	28.3144	0.985223	0.365165	0.52736	-6.96543	0.1969	0.147677
Q9VW52	Q9VW52	Prp3	TRUE	3	0.0909602	-0.92175	1.10367	25.1119	0.223667	0.830954	0.898914	-7.46194	0.335628	0.406678
Q9VW53	Q9VW53	Mtr3	TRUE	2	-0.22828	-0.769044	0.312485	25.3209	-1.05122	0.336407	0.496926	-6.89885	0.185538	0.217157
Q9VWD4	Q9VWD4	CG14230	FALSE	0	-0.240002	-0.634601	0.154597	27.4435	-1.51459	0.184143	0.337016	-6.36233	0.125832	0.15846
Q9VWG2	Q9VWG2	CG14220	FALSE	0	0.319765	-0.185658	0.825188	26.1659	1.57547	0.169742	0.314617	-6.28494	0.117469	0.202965
Q9VWI1	Q9VWI1	pcm	FALSE	0	2.09702	1.01271	3.18133	26.9675	4.81596	0.00356372	0.0377106	-2.13015	0.01408	0.435431
Q9VWL4	Q9VWL4	CG7556	TRUE	4	-0.445889	-0.99811	0.106332	25.307	-2.01071	0.0944806	0.217364	-5.70511	0.0811571	0.221758
Q9VWN4	Q9VWN4	Flacc	FALSE	0	0.755094	0.368071	1.14212	26.2316	4.85847	0.00342091	0.0377106	-2.08409	0.01408	0.155418
Q9VWP5	Q9VWP5	htk	FALSE	0	0.367389	0.0407887	0.693989	29.0591	2.8012	0.0335272	0.114427	-4.61482	0.0427235	0.131154
Q9VWQ6	Q9VWQ6	CG18259	FALSE	0	0.207996	-0.0981087	0.5141	27.295	1.69207	0.145133	0.28633	-6.13362	0.106907	0.122923
Q9VWS1	Q9VWS1	CG6617	FALSE	0	-0.585796	-0.910479	-0.261113	26.7697	-4.49285	0.00490218	0.0404323	-2.48878	0.0150962	0.130384
Q9VWS2	Q9VWS2	Nup35	FALSE	0	-0.0243504	-0.329258	0.280557	28.8293	-0.198871	0.849388	0.912578	-7.46804	0.340729	0.122443
Q9VWY6	Q9VWY6	Taf8	FALSE	0	0.15327	-0.147949	0.454488	25.1505	1.2671	0.255283	0.41852	-6.6622	0.156263	0.120961
Q9VX15	Q9VX15	CG8142	FALSE	0	-0.605193	-1.0693	-0.141089	28.0227	-3.24723	0.0193528	0.0771462	-4.01638	0.0288041	0.186372
Q9VX31	Q9VX31	IntS2	FALSE	0	-0.434246	-1.04949	0.181001	26.4639	-1.7576	0.132871	0.268633	-6.04705	0.100299	0.247067
Q9VX34	Q9VX34	CG5800	FALSE	0	0.0428683	-0.343053	0.42879	28.6352	0.276612	0.792005	0.868537	-7.44655	0.324286	0.154976
Q9VXE6	Q9VXE6	Nup153	FALSE	0	-0.169423	-0.479076	0.140229	30.2822	-1.36249	0.225309	0.380087	-6.54973	0.141913	0.124348
Q9VXE9	Q9VXE9	SMC3	FALSE	0	-0.195109	-0.670563	0.280346	28.2744	-1.02189	0.348952	0.510277	-6.92881	0.190522	0.19093
Q9VXG1	Q9VXG1	hang	FALSE	0	0.0596499	-0.242682	0.361982	28.0783	0.491316	0.641867	0.756401	-7.35236	0.282418	0.121408
Q9VXN4	Q9VXN4	ArgRS	FALSE	0	0.443379	-0.0778633	0.964621	28.1875	2.11822	0.0817912	0.197521	-5.5574	0.0737483	0.209317
Q9VYE9	Q9VYE9	CG1622	FALSE	0	0.954938	0.617564	1.29231	28.4028	7.04854	0.000552092	0.0200824	-0.0249553	0.00749816	0.13548
Q9VYG2	Q9VYG2	Bap60	FALSE	0	0.252098	-0.0864782	0.590674	28.9005	1.85416	0.116653	0.247098	-5.91783	0.092259	0.135963
Q9VYQ9	Q9VYQ9	Tango4	FALSE	0	0.0404629	-0.414315	0.495241	28.4127	0.221561	0.832516	0.898931	-7.46248	0.335634	0.182627
Q9VYW5	Q9VYW5	CG2247	FALSE	0	0.155453	-0.154407	0.465313	28.7637	1.2493	0.261255	0.424721	-6.68269	0.158578	0.124432
Q9VYY7	Q9VYY7	HP5	FALSE	0	-0.130762	-0.496531	0.235008	28.8885	-0.890243	0.409963	0.572179	-7.05581	0.213635	0.146883
Q9VZ02	Q9VZ02	CG1738	FALSE	0	0.0509407	-0.268612	0.370494	25.8707	0.39697	0.70608	0.812131	-7.3999	0.303226	0.128324
Q9VZ55	Q9VZ55	CG1582	FALSE	0	0.452374	0.098198	0.806549	27.5127	3.18063	0.0209679	0.0819014	-4.10428	0.0305796	0.142228
Q9VZ60	Q9VZ60	CG2186	TRUE	3	0.598939	-0.188074	1.38595	25.1915	1.89511	0.110388	0.238832	-5.86252	0.0891728	0.316044
Q9VZ62	Q9VZ62	feo	FALSE	0	-0.799918	-1.12962	-0.470216	27.9841	-6.04169	0.00119862	0.0248544	-0.900262	0.00927989	0.1324
Q9VZ69	Q9VZ69	Imp	FALSE	0	-0.0166219	-0.435332	0.402088	28.6638	-0.0988559	0.924697	0.942511	-7.48546	0.351906	0.168143
Q9VZC8	Q9VZC8	CG15019	TRUE	4	-0.421758	-1.28209	0.438578	25.3006	-1.22076	0.271093	0.434201	-6.71521	0.162118	0.345488
Q9VZE4	Q9VZE4	CG1316	FALSE	0	0.261861	-0.0410183	0.564739	28.6862	2.15296	0.0780779	0.19093	-5.50948	0.0712876	0.121628
Q9VZI1	Q9VZI1	Chd64	FALSE	0	-3.24945	-3.60402	-2.89488	29.0447	-22.8217	9.71554e-07	0.000282722	6.6732	0.00010556	0.142384
Q9VZJ3	Q9VZJ3	Rcd5	FALSE	0	0.0934191	-0.210595	0.397434	28.5522	0.765202	0.475164	0.624596	-7.16406	0.233206	0.122084
Q9VZP5	Q9VZP5	eIF5B	FALSE	0	-0.419561	-1.80781	0.968691	25.9601	-0.752595	0.482129	0.629147	-7.17425	0.234905	0.557486
Q9VZQ1	Q9VZQ1	Ythdc1	FALSE	0	0.305538	-0.146813	0.75789	27.256	1.68199	0.147115	0.28856	-6.14685	0.10774	0.181652
Q9VZS5	Q9VZS5	RpL28	FALSE	0	-0.286361	-0.628786	0.0560641	29.4042	-2.08249	0.0858005	0.20382	-5.6066	0.0761004	0.137509
Q9VZV8	Q9VZV8	CG16753	FALSE	0	-0.661181	-1.01328	-0.309084	25.8494	-4.67619	0.0040836	0.0401631	-2.28341	0.0149957	0.141393
Q9W0A8	Q9W0A8	RpL23A	FALSE	0	-0.388183	-0.702389	-0.0739771	31.3487	-3.0765	0.0237997	0.0881624	-4.24282	0.0329172	0.126177
Q9W0H8	Q9W0H8	scf	TRUE	1	0.223837	-0.152719	0.600393	25.4447	1.48026	0.192766	0.343088	-6.4054	0.128099	0.151215
Q9W0R0	Q9W0R0	Cdc5	FALSE	0	0.226721	-0.159366	0.612807	29.4088	1.46232	0.197423	0.346209	-6.42774	0.129264	0.155042
Q9W0R7	Q9W0R7	Atac3	FALSE	0	0.219129	-0.216447	0.654704	26.7627	1.25277	0.260082	0.424	-6.67871	0.158309	0.174916
Q9W0S7	Q9W0S7	Tudor-SN	FALSE	0	-1.78499	-3.75381	0.18384	25.6237	-2.25768	0.0679111	0.178843	-5.36467	0.0667745	0.790629
Q9W0T7	Q9W0T7	Dis3l2	FALSE	0	-0.261429	-0.88682	0.363962	26.6387	-1.04097	0.34075	0.500799	-6.90939	0.186983	0.251141
Q9W140	Q9W140	CG3548	FALSE	0	0.15238	-0.172461	0.477222	28.2366	1.16813	0.290087	0.450214	-6.77402	0.168097	0.130448
Q9W158	Q9W158	CG4612	FALSE	0	-0.0920391	-0.47215	0.288072	26.2044	-0.602971	0.570131	0.710527	-7.28426	0.26529	0.152643
Q9W1A9	Q9W1A9	enok	FALSE	0	0.287868	-0.0810571	0.656793	28.3723	1.94308	0.103481	0.228128	-5.79742	0.0851763	0.14815
Q9W1C5	Q9W1C5	IntS1	FALSE	0	-0.419966	-0.914742	0.0748099	27.9361	-2.11369	0.0822887	0.197901	-5.56365	0.0738903	0.198689
Q9W1C8	Q9W1C8	CG3163	FALSE	0	0.287254	-0.0317407	0.60625	28.8517	2.24242	0.0693017	0.180868	-5.3858	0.0675308	0.1281
Q9W1G7	Q9W1G7	Nap1	FALSE	0	-0.722894	-1.22158	-0.224211	29.89	-3.60982	0.0126613	0.0578904	-3.54827	0.0216146	0.200258
Q9W1N3	Q9W1N3	levy	FALSE	0	0.410878	0.00424449	0.817511	27.2146	2.5162	0.048335	0.149903	-5.00663	0.0559693	0.163293
Q9W1R5	Q9W1R5	vir	FALSE	0	0.463328	0.145561	0.781095	29.3968	3.63091	0.0123604	0.0573369	-3.52161	0.0214079	0.127607
Q9W254	Q9W254	qkr58E-2	FALSE	0	0.0123694	-0.320028	0.344767	27.1581	0.0926674	0.929395	0.945643	-7.48616	0.353075	0.133482
Q9W255	Q9W255	qkr58E-1	FALSE	0	0.473156	0.148315	0.797997	30.6896	3.62717	0.0124131	0.0573369	-3.52632	0.0214079	0.130448
Q9W2D9	Q9W2D9	eIF3k	FALSE	0	-0.237063	-0.605943	0.131818	26.1997	-1.60034	0.164176	0.308228	-6.25299	0.115083	0.148133
Q9W2E7	Q9W2E7	Rae1	FALSE	0	0.00697103	-0.32581	0.339752	28.5713	0.0521642	0.960209	0.966854	-7.4896	0.360995	0.133636
Q9W2K3	Q9W2K3	hng1	FALSE	0	0.662287	0.338055	0.98652	27.3729	5.08656	0.00275805	0.0326772	-1.84134	0.0122007	0.130203
Q9W2N6	Q9W2N6	CG9346	FALSE	0	0.155438	-0.201265	0.512141	27.2999	1.08514	0.32237	0.488591	-6.86351	0.182425	0.143242
Q9W2U7	Q9W2U7	nocte	FALSE	0	-0.317749	-0.712099	0.0766019	25.866	-2.00649	0.0950181	0.217719	-5.71088	0.0812897	0.158361
Q9W363	Q9W363	mxc	FALSE	0	0.294055	-0.0191502	0.607261	28.3499	2.33795	0.0610624	0.167881	-5.25348	0.0626819	0.125775
Q9W384	Q9W384	Bap111	FALSE	0	0.446882	0.0929675	0.800797	28.9179	3.14434	0.0219103	0.0844491	-4.15242	0.0315308	0.142123
Q9W3B2	Q9W3B2	Rbm13	FALSE	0	-0.583316	-0.89395	-0.272683	28.8524	-4.67618	0.00408366	0.0401631	-2.28343	0.0149957	0.124742
Q9W3C2	Q9W3C2	CG1785	FALSE	0	-0.206117	-0.575547	0.163312	29.3496	-1.38937	0.217463	0.370068	-6.51729	0.138172	0.148353
Q9W3E1	Q9W3E1	IntS4	FALSE	0	0.0316194	-0.588523	0.651762	26.612	0.126969	0.903402	0.934912	-7.48174	0.349068	0.249033
Q9W3M7	Q9W3M7	mahe	FALSE	0	-0.00681001	-0.519438	0.505818	26.5863	-0.0330811	0.974758	0.974847	-7.49056	0.363979	0.205858
Q9W3R9	Q9W3R9	CG1677	FALSE	0	-0.144598	-0.526429	0.237234	27.2693	-0.943028	0.384565	0.543245	-7.0064	0.202832	0.153333
Q9W424	Q9W424	Spx	FALSE	0	0.212807	-0.131972	0.557585	27.2835	1.53702	0.178706	0.328097	-6.33395	0.122502	0.138454
Q9W425	Q9W425	Rbcn-3A	TRUE	1	-2.39585	-3.93234	-0.859354	28.2891	-3.88297	0.00932249	0.0511858	-3.20805	0.0191112	0.617014
Q9W485	Q9W485	IntS6	FALSE	0	0.139007	-0.433821	0.711834	26.6682	0.604291	0.569313	0.710527	-7.28338	0.26529	0.230032
Q9W4C4	Q9W4C4	spoon	FALSE	0	-0.913129	-1.31746	-0.508797	27.8669	-5.62379	0.00170381	0.0291653	-1.29763	0.0108894	0.162369
Q9W4X7	Q9W4X7	eIF3g1	TRUE	1	-0.0973882	-0.726987	0.532211	25.3018	-0.385192	0.714304	0.818026	-7.40517	0.305427	0.25283
Q9W4Z9	Q9W4Z9	CG3071	FALSE	0	-0.268741	-0.581915	0.0444332	30.837	-2.13689	0.0797728	0.193449	-5.53165	0.0722282	0.125763
Q9W542	Q9W542	mip130	FALSE	0	-0.0238192	-0.350221	0.302583	29.521	-0.181722	0.862201	0.91968	-7.47185	0.343381	0.131075
Q9W543	Q9W543	Rbcn-3B	FALSE	0	-2.55169	-2.92492	-2.17846	27.4035	-17.025	4.90798e-06	0.000821709	5.10826	0.000306802	0.149879
Q9XZ21	Q9XZ21	snama	FALSE	0	0.45322	0.127835	0.778605	29.7341	3.46854	0.014901	0.0647193	-3.72849	0.0241642	0.130666
Q9XZ57	Q9XZ57	Eb1	FALSE	0	0.159021	-0.311687	0.629729	29.4179	0.841273	0.434654	0.59522	-7.09972	0.222238	0.189024
Q9Y091	Q9Y091	fl(2)d	FALSE	0	0.750333	0.398626	1.10204	29.0987	5.31261	0.00224254	0.0310378	-1.60788	0.0115886	0.141236
Q9Y0I1	Q9Y0I1	MRG15	FALSE	0	0.0643283	-0.242382	0.371039	28.145	0.522285	0.621483	0.743715	-7.33473	0.277681	0.123167
Q9Y105	Q9Y105	GlnRS	TRUE	1	0.387257	-0.369196	1.14371	26.2354	1.27483	0.252726	0.416675	-6.65324	0.155574	0.303772
X2J6S0	X2J6S0	msl-1	FALSE	0	1.24463	0.772724	1.71653	27.3758	6.56783	0.000789919	0.0241965	-0.429204	0.00903424	0.189503
X2J8R0	X2J8R0	sip1	FALSE	0	0.269094	-0.0578513	0.596039	26.2356	2.04957	0.0896741	0.210445	-5.65183	0.0785739	0.131293
X2J950	X2J950	RpS13	FALSE	0	-0.509853	-0.818109	-0.201597	29.74	-4.11878	0.00722365	0.0461996	-2.92331	0.0172496	0.123787
X2J969	X2J969	MED19	TRUE	4	0.501627	0.195794	0.80746	25.3023	4.08443	0.00749319	0.0474025	-2.96427	0.0176987	0.122815
X2J9B3	X2J9B3	E2f2	FALSE	0	0.276823	-0.0724417	0.626089	27.6095	1.97371	0.0993011	0.223298	-5.75568	0.0833728	0.140256
X2JA36	X2JA36	YL-1	FALSE	0	0.0810653	-0.351495	0.513625	26.5322	0.466684	0.658333	0.767835	-7.36567	0.286687	0.173705
X2JBC1	X2JBC1	Upf1	FALSE	0	-0.11969	-0.471728	0.232348	29.5199	-0.846647	0.431892	0.594234	-7.09499	0.221869	0.141369
X2JC35	X2JC35	RpL36	FALSE	0	-0.577418	-0.965678	-0.189158	28.9599	-3.70342	0.0113856	0.0552199	-3.43044	0.0206175	0.155915
X2JC79	X2JC79	eIF4H1	FALSE	0	0.527366	0.165436	0.889296	27.8627	3.62846	0.0123949	0.0573369	-3.52469	0.0214079	0.145342
X2JEM4	X2JEM4	RpS28b	FALSE	0	0.10985	-0.204757	0.424456	26.8804	0.869492	0.420293	0.581023	-7.07465	0.216937	0.126338
X2JEU3	X2JEU3	CG1737	FALSE	0	0.297306	-0.0111183	0.60573	29.5199	2.40043	0.0562367	0.162195	-5.16688	0.0605588	0.123855
X2JF59	X2JF59	Jafrac1	FALSE	0	0.767893	0.449291	1.0865	29.5648	6.00187	0.00123845	0.0248544	-0.937203	0.00927989	0.127942
X2JFR1	X2JFR1	nonA	FALSE	0	0.852069	0.451586	1.25255	28.0339	5.29816	0.00227196	0.0310378	-1.62259	0.0115886	0.160824
X2JFW6	X2JFW6	CG8289	FALSE	0	0.0423767	-0.270081	0.354835	28.2878	0.337731	0.747869	0.835983	-7.42486	0.312131	0.125475
