# Supplementary material for: The role of RNA in the maintenance of chromatin domains as revealed by antibody-mediated proximity labelling coupled to mass spectrometry
Source: eLife. 2024 May 8;13:e95718. doi: 10.7554/eLife.95718 (PMC11147508; doi:10.7554/eLife.95718)
Supplement: Supplementary file 4. [file elife-95718-supp4.xlsx]

## Sheet: MSL2_C_Exp_MSL2_C_Exp_vs_CID_
ID	Description	GeneRatio	BgRatio	pvalue	p.adjust	qvalue	geneID	Count
GO:0050684	regulation of mRNA processing	12/69	268/18885	2.24277e-10	1.17746e-07	1.10958e-07	Hakai/snRNP-U1-70K/mle/Pep/Rbp1/Saf-B/Nab2/CG4119/Flacc/vir/qkr58E-1/fl(2)d	12
GO:1903311	regulation of mRNA metabolic process	13/69	362/18885	5.58756e-10	1.46673e-07	1.38219e-07	Hakai/snRNP-U1-70K/mle/Pep/Rbp1/Saf-B/Nab2/CG4119/rump/Flacc/vir/qkr58E-1/fl(2)d	13
GO:0043484	regulation of RNA splicing	11/69	266/18885	3.11976e-09	5.45959e-07	5.14487e-07	Hakai/snRNP-U1-70K/Pep/Rbp1/Saf-B/CG4119/glo/Flacc/vir/qkr58E-1/fl(2)d	11
GO:0048024	regulation of mRNA splicing, via spliceosome	10/69	240/18885	1.60672e-08	2.10882e-06	1.98726e-06	Hakai/snRNP-U1-70K/Pep/Rbp1/Saf-B/CG4119/Flacc/vir/qkr58E-1/fl(2)d	10
GO:0006325	chromatin organization	13/69	496/18885	2.44454e-08	2.56677e-06	2.41881e-06	bon/CG18004/msl-2/CtBP/mle/Pc/msl-3/osa/CG8677/AGO2/vir/Bap111/msl-1	13
GO:0007549	dosage compensation	6/69	53/18885	3.8211e-08	3.34346e-06	3.15073e-06	msl-2/mle/msl-3/AGO2/vir/msl-1	6
GO:0000381	regulation of alternative mRNA splicing, via spliceosome	9/69	228/18885	1.40638e-07	1.05478e-05	9.9398e-06	Hakai/snRNP-U1-70K/Rbp1/Saf-B/CG4119/Flacc/vir/qkr58E-1/fl(2)d	9
GO:0000380	alternative mRNA splicing, via spliceosome	9/69	234/18885	1.75364e-07	1.15082e-05	1.08448e-05	Hakai/snRNP-U1-70K/Rbp1/Saf-B/CG4119/Flacc/vir/qkr58E-1/fl(2)d	9
GO:0001510	RNA methylation	5/69	71/18885	6.06954e-06	0.000354056	0.000333647	CG12863/Hakai/Flacc/vir/fl(2)d	5
GO:0007530	sex determination	5/69	81/18885	1.16118e-05	0.000609622	0.000574481	fru/Hakai/Flacc/vir/fl(2)d	5
GO:0040029	regulation of gene expression, epigenetic	7/69	220/18885	1.54719e-05	0.00073843	0.000695864	msl-2/mle/Pc/msl-3/AGO2/vir/msl-1	7
GO:0009451	RNA modification	5/69	157/18885	0.000272727	0.0119318	0.011244	CG12863/Hakai/Flacc/vir/fl(2)d	5
GO:0043414	macromolecule methylation	5/69	193/18885	0.0007004	0.0282854	0.0266549	CG12863/Hakai/Flacc/vir/fl(2)d	5
GO:0032259	methylation	5/69	199/18885	0.000803898	0.0301462	0.0284084	CG12863/Hakai/Flacc/vir/fl(2)d	5
GO:0010608	post-transcriptional regulation of gene expression	7/69	443/18885	0.00114883	0.040209	0.0378912	Syp/mle/Atx2/Nab2/glo/rump/AGO2	7
GO:0031123	RNA 3'-end processing	4/69	129/18885	0.00127464	0.0418241	0.0394132	Rbp1/FLASH/Nab2/IntS14	4
GO:0006338	chromatin remodeling	5/69	229/18885	0.00150135	0.0463652	0.0436925	CG18004/CtBP/osa/CG8677/Bap111	5

## Sheet: CID_C_Exp_MSL2_C_Exp_vs_CID_C
ID	Description	GeneRatio	BgRatio	pvalue	p.adjust	qvalue	geneID	Count
GO:0042254	ribosome biogenesis	26/98	283/18885	1.69302e-25	1.10385e-22	9.73042e-23	RpS16/hoip/CG11417/bys/smid/Ns2/RpS15/CG12909/CG5033/l(2)k09848/Sas10/CG7637/CG11563/CG1542/CG7006/CG3817/RpL24-like/RpL7-like/CG13097/CG11030/mbm/CG6833/RpL26/CG16753/RpL23A/Rbm13	26
GO:0022613	ribonucleoprotein complex biogenesis	27/98	413/18885	1.58053e-22	5.15253e-20	4.54195e-20	eIF2gamma/RpS16/hoip/CG11417/bys/smid/Ns2/RpS15/CG12909/CG5033/l(2)k09848/Sas10/CG7637/CG11563/CG1542/CG7006/CG3817/RpL24-like/RpL7-like/CG13097/CG11030/mbm/CG6833/RpL26/CG16753/RpL23A/Rbm13	27
GO:0016072	rRNA metabolic process	16/98	212/18885	1.51655e-14	3.29597e-12	2.90539e-12	RpS16/CG11417/bys/CG12909/CG5033/Sas10/CG7637/CG1542/CG18600/CG3817/RpL7-like/CG13097/CG11030/CG6833/CG16753/Rbm13	16
GO:0006364	rRNA processing	15/98	187/18885	4.36607e-14	7.1167e-12	6.27336e-12	RpS16/CG11417/bys/CG12909/CG5033/Sas10/CG7637/CG1542/CG3817/RpL7-like/CG13097/CG11030/CG6833/CG16753/Rbm13	15
GO:0042273	ribosomal large subunit biogenesis	11/98	72/18885	9.60776e-14	1.25285e-11	1.10439e-11	CG5033/l(2)k09848/CG11563/CG1542/CG7006/CG3817/RpL24-like/RpL7-like/RpL26/RpL23A/Rbm13	11
GO:0002181	cytoplasmic translation	13/98	212/18885	7.22294e-11	7.84893e-09	6.91882e-09	eIF2gamma/eIF3m/RpS16/RpS25/RpS15/larp/RpL24-like/RpL7-like/RpL26/RpL23A/spoon/RpS13/RpL36	13
GO:0034660	ncRNA metabolic process	18/98	500/18885	8.77535e-11	8.17361e-09	7.20502e-09	RpS16/CG11417/bys/CG12909/CG5033/Sas10/CG7637/CG1542/CG18600/CG3817/AspRS-m/RpL7-like/CG13097/CG11030/CG3756/CG6833/CG16753/Rbm13	18
GO:0034470	ncRNA processing	15/98	355/18885	4.28608e-10	3.49315e-08	3.07921e-08	RpS16/CG11417/bys/CG12909/CG5033/Sas10/CG7637/CG1542/CG3817/RpL7-like/CG13097/CG11030/CG6833/CG16753/Rbm13	15
GO:0042274	ribosomal small subunit biogenesis	6/98	83/18885	4.57467e-06	0.000331409	0.000292137	RpS16/RpS15/Sas10/CG11030/mbm/CG16753	6
GO:0006413	translational initiation	6/98	123/18885	4.3595e-05	0.00284239	0.00250557	eIF2gamma/eIF3m/eIF3b/eIF3e/eIF2Bdelta/eIF3d1	6
GO:0051225	spindle assembly	6/98	133/18885	6.74746e-05	0.00399941	0.00352547	Pp2A-29B/Lam/cid/larp/Klp67A/feo	6
GO:0007051	spindle organization	8/98	283/18885	0.000112988	0.00613903	0.00541154	tacc/Pp2A-29B/Lam/DCTN2-p50/cid/larp/Klp67A/feo	8
GO:0034248	regulation of cellular amide metabolic process	10/98	459/18885	0.00013538	0.0067898	0.0059852	sqd/eIF2gamma/kay/hoip/eIF3b/Spt6/peng/larp/eIF3d1/spoon	10
GO:0034250	positive regulation of cellular amide metabolic process	6/98	164/18885	0.000213116	0.00992514	0.00874899	eIF2gamma/kay/hoip/Spt6/larp/spoon	6
GO:0030490	maturation of SSU-rRNA	4/98	59/18885	0.000249341	0.010838	0.00955369	RpS16/Sas10/CG11030/CG16753	4
GO:0000819	sister chromatid segregation	7/98	244/18885	0.000281116	0.0114555	0.010098	RfC4/DCTN2-p50/RfC38/cid/bel/Klp67A/feo	7
GO:0051656	establishment of organelle localization	9/98	419/18885	0.000329493	0.012637	0.0111395	tacc/sqh/Msp300/Lam/Arp1/Ns2/DCTN2-p50/cid/Klp67A	9
GO:0006417	regulation of translation	8/98	344/18885	0.000423544	0.0153417	0.0135237	sqd/eIF2gamma/hoip/eIF3b/peng/larp/eIF3d1/spoon	8
GO:0010608	post-transcriptional regulation of gene expression	9/98	443/18885	0.000493558	0.0169368	0.0149298	sqd/eIF2gamma/CG6701/hoip/eIF3b/peng/larp/eIF3d1/spoon	9
GO:0007059	chromosome segregation	8/98	361/18885	0.000582072	0.0187378	0.0165173	Pp2A-29B/RfC4/DCTN2-p50/RfC38/cid/bel/Klp67A/feo	8
GO:2000112	regulation of cellular macromolecule biosynthetic process	8/98	363/18885	0.000603518	0.0187378	0.0165173	sqd/eIF2gamma/hoip/eIF3b/peng/larp/eIF3d1/spoon	8
GO:0045727	positive regulation of translation	4/98	78/18885	0.000724855	0.0206603	0.018212	eIF2gamma/hoip/larp/spoon	4
GO:0006261	DNA-templated DNA replication	5/98	137/18885	0.000738813	0.0206603	0.018212	RfC4/RfC38/larp/CG8142/spoon	5
GO:0051028	mRNA transport	4/98	79/18885	0.000760502	0.0206603	0.018212	sqd/Hel25E/DCTN2-p50/Ref1	4
GO:0000910	cytokinesis	6/98	226/18885	0.00115789	0.0301978	0.0266193	cindr/Act87E/sqh/Lam/Klp67A/feo	6
GO:0098813	nuclear chromosome segregation	7/98	313/18885	0.00122656	0.0307583	0.0271134	RfC4/DCTN2-p50/RfC38/cid/bel/Klp67A/feo	7
GO:0060811	intracellular mRNA localization involved in anterior/posterior axis specification	5/98	159/18885	0.00143731	0.0347084	0.0305954	Tm1/sqd/Sry-delta/DCTN2-p50/btz	5
GO:0006997	nucleus organization	5/98	163/18885	0.00160373	0.0373441	0.0329187	tacc/Nlp/Msp300/Lam/Nap1	5
GO:0006260	DNA replication	5/98	168/18885	0.00183119	0.0397979	0.0350818	RfC4/RfC38/larp/CG8142/spoon	5
GO:0060810	intracellular mRNA localization involved in pattern specification process	5/98	168/18885	0.00183119	0.0397979	0.0350818	Tm1/sqd/Sry-delta/DCTN2-p50/btz	5
GO:0071824	protein-DNA complex subunit organization	5/98	175/18885	0.00218826	0.046024	0.0405701	Act87E/Spt6/cid/CG18600/Nap1	5
