# Supplementary material for: The role of RNA in the maintenance of chromatin domains as revealed by antibody-mediated proximity labelling coupled to mass spectrometry
Source: eLife. 2024 May 8;13:e95718. doi: 10.7554/eLife.95718 (PMC11147508; doi:10.7554/eLife.95718)
Supplement: Supplementary file 5. [file elife-95718-supp5.xlsx]

## Sheet: MSL2-vs-AB ctl
name	Uniprot	Symbol	symbol	ID	imputed	num_NAs	MSL_Exp_vs_AB_Ctl_logFC	MSL_Exp_vs_AB_Ctl_CI.L	MSL_Exp_vs_AB_Ctl_CI.R	MSL_Exp_vs_AB_Ctl_AveExpr	MSL_Exp_vs_AB_Ctl_t	MSL_Exp_vs_AB_Ctl_P.Value	MSL_Exp_vs_AB_Ctl_adj.P.Val	MSL_Exp_vs_AB_Ctl_B
14-3-3zeta	A0A0B4KEH0	14-3-3zeta	14-3-3zeta	A0A0B4KEH0	FALSE	0	0.289749	-0.457615	1.03711	26.8038	1.06	0.34673	0.418936	-6.81831
A0A4D6K557	A0A4D6K557	NA	NA	A0A4D6K557	FALSE	0	0.684439	-0.913802	2.28268	27.2327	1.17087	0.304281	0.382636	-6.7008
abs	Q9V3C0	abs	abs	Q9V3C0	FALSE	0	2.28108	1.54951	3.01266	28.3777	8.52512	0.000868911	0.00597983	-0.0565532
ACC	A1Z784	ACC	ACC	A1Z784	FALSE	0	-6.5245	-7.48602	-5.56298	31.3083	-18.5526	3.68346e-05	0.00173608	3.351
Acf	Q9V9T4	Acf	Acf	Q9V9T4	TRUE	1	1.75198	1.09039	2.41358	26.7507	7.24021	0.00165426	0.00861011	-0.805553
Acn	Q9VJ12	Acn	Acn	Q9VJ12	FALSE	0	-0.16834	-0.734259	0.397579	30.3089	-0.813295	0.460009	0.531687	-7.05348
Act5C	X2JCP8	Act5C	Act5C	X2JCP8	FALSE	0	0.0940838	-0.468192	0.656359	33.0561	0.457489	0.670183	0.7206	-7.30656
Actn	F0JAG6	Actn	Actn	F0JAG6	TRUE	2	1.93115	1.20645	2.65585	27.9791	7.28569	0.00161427	0.00859967	-0.776931
AGO2	Q9VUQ5	AGO2	AGO2	Q9VUQ5	FALSE	0	1.88211	1.30287	2.46134	30.2425	8.88386	0.00073742	0.0054016	0.132664
Aladin	Q9W351	Aladin	Aladin	Q9W351	FALSE	0	-0.908218	-1.67772	-0.138721	28.3378	-3.22699	0.0302798	0.0652351	-4.21974
alpha-Spec	P13395	alpha-Spec	alpha-Spec	P13395	FALSE	0	-0.3874	-1.78518	1.01038	31.1675	-0.757769	0.489226	0.560356	-7.1004
alphaCOP	Q9W0B8	alphaCOP	alphaCOP	Q9W0B8	FALSE	0	-0.901935	-1.73705	-0.0668159	32.4371	-2.95286	0.0398252	0.0792908	-4.53511
alphaTub84B	P06603	alphaTub84B	alphaTub84B	P06603	FALSE	0	0.437887	-0.0899901	0.965765	32.1964	2.26801	0.0833072	0.137129	-5.36681
alt	Q960Y8	alt	alt	Q960Y8	FALSE	0	-0.237959	-0.775552	0.299634	29.1447	-1.21022	0.290395	0.370046	-6.65766
AP-2alpha	P91926	AP-2alpha	AP-2alpha	P91926	TRUE	2	-0.673296	-1.22332	-0.12327	26.5209	-3.34687	0.026964	0.0603087	-4.08548
ArgRS	Q9VXN4	ArgRS	ArgRS	Q9VXN4	TRUE	2	1.36886	0.784615	1.9531	26.7132	6.40591	0.00265823	0.0113936	-1.36216
Ars2	Q9V9K7	Ars2	Ars2	Q9V9K7	FALSE	0	3.08519	2.47169	3.69868	28.9971	13.7495	0.000126048	0.00246902	2.10013
asl	Q9VNE4	asl	asl	Q9VNE4	TRUE	2	-1.14026	-2.31544	0.0349292	25.7665	-2.65284	0.0545189	0.0996286	-4.89269
asp	Q9VC45	asp	asp	Q9VC45	TRUE	1	-0.201249	-1.96559	1.5631	26.7005	-0.311864	0.770142	0.81024	-7.37333
atms	Q9VN55	atms	atms	Q9VN55	TRUE	1	0.780884	0.283341	1.27843	27.3817	4.29112	0.0116766	0.0319744	-3.10713
ATPsyngamma	O01666	ATPsyngamma	ATPsyngamma	O01666	TRUE	1	-1.2942	-1.97713	-0.611262	26.1609	-5.18127	0.0059158	0.0198095	-2.30552
aurB	Q9VKN7	aurB	aurB	Q9VKN7	TRUE	2	1.09436	0.600652	1.58807	27.6146	6.06045	0.00328588	0.0130517	-1.61178
B52	A0A0C4DHG5	B52	B52	A0A0C4DHG5	FALSE	0	-0.846622	-1.93004	0.236794	31.6674	-2.13653	0.0967799	0.154112	-5.53142
baf	M9PCH8	baf	baf	M9PCH8	TRUE	2	0.0899572	-0.664391	0.844305	28.2065	0.326047	0.760125	0.803983	-7.36788
ball	A4V3G8	ball	ball	A4V3G8	FALSE	0	0.139392	-0.576135	0.854919	28.8148	0.53263	0.621456	0.679428	-7.26316
Bap170	A1Z6M0	Bap170	Bap170	A1Z6M0	TRUE	2	2.93968	2.47808	3.40129	26.9508	17.4118	4.78367e-05	0.00173608	3.09643
Bap55	Q7K012	Bap55	Bap55	Q7K012	TRUE	1	3.26697	2.74576	3.78818	28.0769	17.1375	5.10668e-05	0.00173608	3.03175
bel	Q9VHP0	bel	bel	Q9VHP0	FALSE	0	1.65281	1.16067	2.14494	31.9842	9.18227	0.000646276	0.00518791	0.284213
beta-Spec	Q00963	beta-Spec	beta-Spec	Q00963	FALSE	0	0.264004	-1.49512	2.02312	30.1742	0.410327	0.70181	0.751848	-7.33075
beta'COP	O62621	beta'COP	beta'COP	O62621	FALSE	0	-0.62536	-1.42512	0.174402	31.115	-2.13789	0.0966294	0.154112	-5.52972
betaCOP	P45437	betaCOP	betaCOP	P45437	FALSE	0	-0.475862	-1.55795	0.606223	30.8633	-1.20236	0.29312	0.371793	-6.66633
betaTub56D	Q24560	betaTub56D	betaTub56D	Q24560	FALSE	0	0.0223385	-0.496195	0.540872	32.3205	0.117786	0.911703	0.929964	-7.42419
betaTub60D.1	A0A0B4LGH1	betaTub60D	betaTub60D	A0A0B4LGH1	TRUE	2	0.244668	-0.250616	0.739952	26.8878	1.35064	0.245565	0.325568	-6.49853
blw	P35381	blw	blw	P35381	TRUE	1	-2.19485	-2.81839	-1.57132	25.8664	-9.62417	0.000535364	0.00472937	0.49949
bor	Q9VEX6	bor	bor	Q9VEX6	FALSE	0	0.0209458	-0.55535	0.597241	31.3403	0.0993726	0.925445	0.938254	-7.42665
brm	P25439	brm	brm	P25439	FALSE	0	3.34113	2.53486	4.1474	28.3813	11.33	0.000277186	0.0038674	1.24118
BRWD3	Q9VC96	BRWD3	BRWD3	Q9VC96	FALSE	0	0.827767	-1.73777	3.39331	28.4308	0.882155	0.42569	0.497913	-6.992
bsf	Q9VJ86	bsf	bsf	Q9VJ86	TRUE	2	-0.921298	-1.67054	-0.172057	26.184	-3.36197	0.0265772	0.0599009	-4.06873
Bug22	Q9VKV8	Bug22	Bug22	Q9VKV8	TRUE	2	-0.646286	-1.31638	0.0238047	25.5192	-2.63698	0.0554546	0.100608	-4.91193
bys	P51406	bys	bys	P51406	FALSE	0	1.26699	0.428606	2.10537	27.4549	4.13186	0.0133263	0.0356585	-3.26245
C0HL67	C0HL67	NA	NA	C0HL67	FALSE	0	1.22506	0.104561	2.34556	31.0957	2.98924	0.0383754	0.0772783	-4.4926
cactin	Q9VR99	cactin	cactin	Q9VR99	TRUE	1	1.60574	1.14428	2.06719	26.4962	9.51394	0.00056068	0.00476172	0.446776
Caf1-55	Q24572	Caf1-55	Caf1-55	Q24572	FALSE	0	2.24863	1.6544	2.84287	28.5676	10.3461	0.000400206	0.00459844	0.829607
Cap-D2	Q9VAJ1	Cap-D2	Cap-D2	Q9VAJ1	TRUE	1	0.782112	-0.0383968	1.60262	27.8234	2.60616	0.057325	0.10368	-4.94938
Cap-G	A1Z987	Cap-G	Cap-G	A1Z987	FALSE	0	0.151128	-1.44729	1.74955	27.6625	0.258505	0.808298	0.841319	-7.39178
Caper	Q9VM49	Caper	Caper	Q9VM49	FALSE	0	-0.157533	-1.02218	0.707113	28.9214	-0.498137	0.64356	0.694524	-7.28381
Cat	P17336	Cat	Cat	P17336	FALSE	0	-1.45327	-2.26509	-0.641448	28.7235	-4.89441	0.00729027	0.0224847	-2.55208
Cbp80	E2QD75	Cbp80	Cbp80	E2QD75	FALSE	0	1.63674	0.829206	2.44427	28.7662	5.54159	0.00460715	0.0166654	-2.01041
Cdc5	Q9W0R0	Cdc5	Cdc5	Q9W0R0	FALSE	0	2.5521	1.17696	3.92723	28.681	5.07419	0.0063888	0.0209578	-2.39631
Cenp-C	Q9VHP9	Cenp-C	Cenp-C	Q9VHP9	FALSE	0	1.67097	1.01429	2.32764	28.1797	6.95721	0.00193225	0.00959573	-0.987483
CG10077	Q8MZI3	CG10077	CG10077	Q8MZI3	FALSE	0	1.56399	0.304184	2.82379	28.0149	3.39426	0.0257718	0.0587636	-4.03302
CG10333	Q9VJ74	CG10333	CG10333	Q9VJ74	FALSE	0	0.174084	-0.380947	0.729116	28.0779	0.857545	0.437712	0.508927	-7.01438
CG1142	Q8STI6	CG1142	CG1142	Q8STI6	TRUE	1	0.246118	-0.458875	0.951111	26.999	0.954496	0.391908	0.465838	-6.92379
CG11583	Q9VZE6	CG11583	CG11583	Q9VZE6	FALSE	0	0.178431	-0.491877	0.848739	30.0296	0.727799	0.505566	0.57415	-7.12468
CG11920	Q9VBY2	CG11920	CG11920	Q9VBY2	TRUE	1	1.2922	0.774498	1.80991	27.4219	6.82437	0.00208236	0.0100848	-1.07525
CG11999	Q9VNA3	CG11999	CG11999	Q9VNA3	FALSE	0	3.00522	1.78071	4.22973	28.1341	6.71013	0.002223	0.0105909	-1.15198
CG12301	Q9VUR2	CG12301	CG12301	Q9VUR2	FALSE	0	1.4484	0.667533	2.22927	28.6252	5.07139	0.0064018	0.0209578	-2.39871
CG12325	Q5U0X8	CG12325	CG12325	Q5U0X8	FALSE	0	-1.17274	-2.35244	0.00695539	29.5261	-2.71799	0.0508612	0.0940211	-4.81402
CG1234	Q9VI82	CG1234	CG1234	Q9VI82	FALSE	0	-1.06176	-1.95033	-0.17318	29.8636	-3.26697	0.0291234	0.0632086	-4.17471
CG12499	Q9VD07	CG12499	CG12499	Q9VD07	FALSE	0	-1.19229	-2.34447	-0.0401206	30.9748	-2.82931	0.0452422	0.085799	-4.68087
CG12702	Q9VWC7	CG12702	CG12702	Q9VWC7	FALSE	0	-0.811189	-1.76444	0.142065	28.2886	-2.32664	0.077982	0.130192	-5.29372
CG13096	H0RNN8	CG13096	CG13096	H0RNN8	FALSE	0	-0.386469	-1.12233	0.349388	30.7119	-1.43594	0.221682	0.297267	-6.39852
CG1316	Q9VZE4	CG1316	CG1316	Q9VZE4	TRUE	1	1.67912	1.19915	2.15909	27.527	9.56488	0.000548801	0.00472937	0.471218
CG13185	A8DYB0	CG13185	CG13185	A8DYB0	FALSE	0	-0.0867645	-2.11941	1.94588	30.847	-0.116707	0.912508	0.929964	-7.42434
CG14712	Q9VGL0	CG14712	CG14712	Q9VGL0	FALSE	0	1.6162	0.796269	2.43613	26.7952	5.38932	0.00511231	0.0179741	-2.13321
CG14805	Q9W550	CG14805	CG14805	Q9W550	FALSE	0	-0.0906277	-0.962112	0.780856	28.973	-0.284326	0.789746	0.826413	-7.38327
CG1575	Q9W3K4	CG1575	CG1575	Q9W3K4	FALSE	0	-0.0486635	-1.23794	1.14061	27.0801	-0.111876	0.91611	0.932015	-7.42502
CG15784	Q9W4C1	CG15784	CG15784	Q9W4C1	FALSE	0	-1.7171	-2.19591	-1.23829	29.8188	-9.80508	0.00049679	0.00472937	0.584642
CG1622	Q9VYE9	CG1622	CG1622	Q9VYE9	TRUE	1	3.05892	2.4079	3.70995	27.2823	12.8465	0.000166331	0.00278485	1.80208
CG1671	Q7JQT9	CG1671	CG1671	Q7JQT9	FALSE	0	-1.20562	-2.27281	-0.138444	29.8884	-3.0888	0.0347117	0.0726633	-4.37729
CG16903	Q9W526	CG16903	CG16903	Q9W526	FALSE	0	-0.723126	-1.1947	-0.251548	28.3599	-4.19253	0.0126669	0.0343649	-3.20283
CG1785	Q9W3C2	CG1785	CG1785	Q9W3C2	FALSE	0	1.0394	0.293584	1.78521	28.3174	3.81037	0.0175891	0.0438605	-3.5878
CG18259	Q9VWQ6	CG18259	CG18259	Q9VWQ6	TRUE	2	-0.170706	-0.96147	0.620059	27.003	-0.590223	0.585597	0.648695	-7.22603
CG18273	Q9I7Z8	CG18273	CG18273	Q9I7Z8	FALSE	0	-0.864332	-2.22159	0.492928	30.0163	-1.74114	0.153819	0.227398	-6.02687
CG1965	Q9VI54	CG1965	CG1965	Q9VI54	TRUE	2	1.87678	1.26865	2.48491	26.6267	8.43789	0.00090514	0.00602741	-0.103777
CG2199	M9PBH8	CG2199	CG2199	M9PBH8	FALSE	0	0.869024	0.328269	1.40978	30.5696	4.39386	0.0107418	0.030118	-3.00894
CG2247	Q9VYW5	CG2247	CG2247	Q9VYW5	FALSE	0	1.83467	0.731416	2.93792	27.2688	4.54672	0.00951152	0.027189	-2.86569
CG2260	Q9W3K3	CG2260	CG2260	Q9W3K3	FALSE	0	-0.699563	-1.80451	0.405386	28.5685	-1.73101	0.155685	0.227891	-6.03945
CG2691	X2JEW2	CG2691	CG2691	X2JEW2	FALSE	0	-1.07505	-1.83812	-0.311982	30.209	-3.85195	0.0169547	0.0426153	-3.54482
CG2875	Q9W4R1	CG2875	CG2875	Q9W4R1	FALSE	0	-0.0550002	-1.67539	1.56539	28.248	-0.0928025	0.930356	0.941604	-7.42743
CG2926	Q9VNE0	CG2926	CG2926	Q9VNE0	FALSE	0	-0.162669	-0.750124	0.424787	28.1802	-0.757085	0.489594	0.560356	-7.10096
CG30349	A1Z7K2	CG30349	CG30349	A1Z7K2	FALSE	0	-1.0289	-2.15038	0.0925815	30.3588	-2.5084	0.0637507	0.111323	-5.06892
CG3071	Q9W4Z9	CG3071	CG3071	Q9W4Z9	FALSE	0	-0.00748028	-1.49763	1.48267	30.1262	-0.0137247	0.989682	0.993072	-7.43263
CG31368	Q7KSN8	CG31368	CG31368	Q7KSN8	FALSE	0	0.491073	-0.678807	1.66095	28.8766	1.14768	0.312748	0.389936	-6.72589
CG3164	Q9VPJ9	CG3164	CG3164	Q9VPJ9	TRUE	2	-1.61621	-2.3398	-0.892612	25.3691	-6.10685	0.00319181	0.012811	-1.57755
CG32075	Q8SZY9	CG32075	CG32075	Q8SZY9	FALSE	0	-0.454165	-1.54517	0.636835	28.8248	-1.13816	0.316284	0.393129	-6.73611
CG32344	Q8SY39	CG32344	CG32344	Q8SY39	FALSE	0	-0.727025	-1.61165	0.157602	29.7622	-2.24701	0.0853123	0.139645	-5.39304
CG32409	Q8I937	CG32409	CG32409	Q8I937	FALSE	0	1.06324	0.235796	1.89069	28.5573	3.51324	0.0230422	0.0540699	-3.90291
CG33111	Q9VCH2	CG33111	CG33111	Q9VCH2	TRUE	2	-3.26817	-3.92375	-2.61258	33.4076	-13.6298	0.00013063	0.00246902	2.06204
CG33129	Q9VKM7	CG33129	CG33129	Q9VKM7	TRUE	2	0.823943	0.335396	1.31249	27.1669	4.61112	0.00904434	0.0261272	-2.80634
CG33217	Q8MS38	CG33217	CG33217	Q8MS38	FALSE	0	-0.31222	-1.8891	1.26466	28.6621	-0.541349	0.615942	0.674658	-7.25775
CG3527	Q9W4J5	CG3527	CG3527	Q9W4J5	FALSE	0	0.113073	-0.501997	0.728142	28.2871	0.502631	0.640655	0.692664	-7.28119
CG3542	Q9VQK5	CG3542	CG3542	Q9VQK5	TRUE	1	2.58416	1.85273	3.31558	27.2354	9.65968	0.000527509	0.00472937	0.516337
CG3735	Q9W1G1	CG3735	CG3735	Q9W1G1	FALSE	0	0.255515	-0.703479	1.21451	28.1115	0.728477	0.505191	0.57415	-7.12414
CG3961	E2QCY2	CG3961	CG3961	E2QCY2	TRUE	1	0.470012	-0.911512	1.85154	26.1652	0.930178	0.403006	0.476132	-6.94711
CG4038	Q7KVQ0	CG4038	CG4038	Q7KVQ0	FALSE	0	0.858745	0.352925	1.36456	30.2888	4.64177	0.00883167	0.025748	-2.77829
CG4119	Q9V3Y5	CG4119	CG4119	Q9V3Y5	FALSE	0	3.09003	2.47345	3.70661	28.2318	13.7022	0.000127835	0.00246902	2.08512
CG42232	B7Z0I8	CG42232	CG42232	B7Z0I8	FALSE	0	0.344547	-0.204245	0.893339	31.6774	1.71655	0.158391	0.228614	-6.05738
CG42668	Q9I7I8	CG42668	CG42668	Q9I7I8	FALSE	0	-0.347988	-1.18888	0.492899	27.3304	-1.13147	0.318794	0.394954	-6.74328
CG42724	A0A0B4KFB8	CG42724	CG42724	A0A0B4KFB8	TRUE	1	2.56007	1.48152	3.63863	27.2908	6.48972	0.00252867	0.0112281	-1.30339
CG4364	Q9VL96	CG4364	CG4364	Q9VL96	FALSE	0	-1.57477	-2.39821	-0.751326	30.7692	-5.22876	0.00571964	0.0192627	-2.26572
CG44250	Q8SZ28	CG44250	CG44250	Q8SZ28	TRUE	2	0.749774	0.222403	1.27714	26.5896	3.88714	0.016439	0.0416362	-3.50865
CG4554	Q9W246	CG4554	CG4554	Q9W246	FALSE	0	-1.38741	-2.57268	-0.202135	31.277	-3.20038	0.0310795	0.0662275	-4.24986
CG4806	Q9W124	CG4806	CG4806	Q9W124	FALSE	0	0.554732	-0.79231	1.90177	28.4065	1.12594	0.320878	0.396698	-6.74917
CG4849	Q9VAX8	CG4849	CG4849	Q9VAX8	FALSE	0	0.908346	-0.0786761	1.89537	30.9312	2.51617	0.063211	0.111323	-5.05938
CG4901	Q9VL25	CG4901	CG4901	Q9VL25	FALSE	0	-0.631034	-1.30017	0.0380977	28.7127	-2.57844	0.0590692	0.105532	-4.98317
CG5033	Q7K0Y1	CG5033	CG5033	Q7K0Y1	FALSE	0	-0.525955	-1.45129	0.399376	30.3551	-1.55406	0.19238	0.267144	-6.25682
CG5181	Q9VM17	CG5181	CG5181	Q9VM17	TRUE	2	0.326023	-0.145594	0.79764	25.8914	1.89005	0.128945	0.194746	-5.84094
CG5589	Q9VVK8	CG5589	CG5589	Q9VVK8	TRUE	2	0.601388	-0.070648	1.27342	26.4035	2.44668	0.068226	0.117245	-5.14491
CG5728	Q9VC94	CG5728	CG5728	Q9VC94	FALSE	0	-0.899458	-2.04443	0.245511	31.9024	-2.14784	0.095531	0.153373	-5.51723
CG5787	Q9VK59	CG5787	CG5787	Q9VK59	FALSE	0	3.01675	2.39971	3.63378	31.1313	13.3673	0.000141432	0.00251149	1.97697
CG5800	Q9VX34	CG5800	CG5800	Q9VX34	TRUE	1	1.44841	0.816462	2.08036	27.1807	6.26649	0.00289223	0.012106	-1.46147
CG5808	Q9XYZ6	CG5808	CG5808	Q9XYZ6	TRUE	2	-1.28713	-1.78081	-0.793452	26.513	-7.12844	0.00175779	0.00880396	-0.876604
CG5877	Q9VXW9	CG5877	CG5877	Q9VXW9	TRUE	2	-1.06762	-1.91249	-0.222745	26.8002	-3.45493	0.024335	0.0559227	-3.96639
CG6066	Q9VB74	CG6066	CG6066	Q9VB74	TRUE	2	-2.62646	-3.47337	-1.77956	26.9038	-8.47912	0.00088779	0.00597983	-0.0813969
CG6479	M9PFY2	CG6479	CG6479	M9PFY2	FALSE	0	-1.19103	-1.94915	-0.432906	28.3132	-4.29534	0.0116364	0.0319744	-3.10307
CG6621	A0A0B4JDC3	CG6621	CG6621	A0A0B4JDC3	FALSE	0	-0.927161	-1.67089	-0.183431	27.7385	-3.40844	0.0254274	0.0582048	-4.01741
CG6686	Q9VKD8	CG6686	CG6686	Q9VKD8	TRUE	1	2.49188	1.88192	3.10185	28.411	11.1696	0.000293669	0.00389432	1.17687
CG6701	A1Z9K0	CG6701	CG6701	A1Z9K0	FALSE	0	2.65109	1.90297	3.39921	27.1048	9.68873	0.000521188	0.00472937	0.530073
CG6712	Q9VKB4	CG6712	CG6712	Q9VKB4	FALSE	0	-1.83556	-2.43653	-1.23459	29.2337	-8.35089	0.00094314	0.00614089	-0.151366
CG6724	M9PB96	CG6724	CG6724	M9PB96	TRUE	1	-0.514202	-1.24133	0.212931	27.3582	-1.93346	0.122529	0.187964	-5.78649
CG6841	Q9VVU6	CG6841	CG6841	Q9VVU6	FALSE	0	0.604691	-0.0829638	1.29234	28.9944	2.40424	0.0715092	0.121462	-5.19738
CG6937	Q9VCY1	CG6937	CG6937	Q9VCY1	FALSE	0	-0.372236	-0.850934	0.106462	29.7491	-2.12604	0.0979544	0.155559	-5.54459
CG6962	Q9VGH0	CG6962	CG6962	Q9VGH0	FALSE	0	-1.19894	-1.98268	-0.415193	28.2469	-4.18252	0.012773	0.034493	-3.21263
CG7006	Q9VC28	CG7006	CG7006	Q9VC28	FALSE	0	1.77172	1.23336	2.31007	27.9767	8.99788	0.000700836	0.0054016	0.191179
CG7028	Q9Y145	CG7028	CG7028	Q9Y145	FALSE	0	-0.282637	-0.908298	0.343025	28.4286	-1.2351	0.281922	0.36309	-6.63002
CG7065	Q7YZA2	CG7065	CG7065	Q7YZA2	FALSE	0	1.68308	0.805316	2.56084	28.5715	5.24255	0.00566418	0.0191862	-2.25422
CG7137	Q7K2B0	CG7137	CG7137	Q7K2B0	FALSE	0	-0.387708	-1.11029	0.334869	29.6524	-1.46702	0.213563	0.289026	-6.36157
CG7139	Q9XZ11	CG7139	CG7139	Q9XZ11	TRUE	2	-0.282378	-0.973951	0.409196	26.2547	-1.11637	0.324522	0.399016	-6.75935
CG7246	Q9W397	CG7246	CG7246	Q9W397	FALSE	0	-0.125978	-2.41422	2.16226	27.824	-0.150525	0.887364	0.910675	-7.41878
CG7275	Q9VUN7	CG7275	CG7275	Q9VUN7	FALSE	0	0.288781	-0.356278	0.93384	28.1949	1.22401	0.28567	0.366308	-6.64237
CG7483	Q9VHS8	CG7483	CG7483	Q9VHS8	FALSE	0	0.427386	-0.172254	1.02703	29.2321	1.9487	0.120359	0.186399	-5.76736
CG7601	Q9Y140	CG7601	CG7601	Q9Y140	TRUE	2	-0.801649	-1.3152	-0.288096	25.7808	-4.2679	0.0119013	0.0324379	-3.12954
CG7637	Q9V5P6	CG7637	CG7637	Q9V5P6	TRUE	1	1.44101	0.770362	2.11166	27.3718	5.87472	0.003698	0.0140013	-1.75107
CG7728	Q9VVC9	CG7728	CG7728	Q9VVC9	FALSE	0	-0.828859	-2.23248	0.574762	29.8145	-1.61453	0.178929	0.252049	-6.1831
CG7824	Q9VAF3	CG7824	CG7824	Q9VAF3	TRUE	2	-0.213852	-1.34333	0.91563	26.2125	-0.517666	0.630989	0.688566	-7.27227
CG7839	Q9VTE6	CG7839	CG7839	Q9VTE6	FALSE	0	-0.561108	-1.45473	0.332518	29.9997	-1.71675	0.158354	0.228614	-6.05714
CG7878	Q7K4L8	CG7878	CG7878	Q7K4L8	TRUE	2	0.436672	-0.179019	1.05236	27.0221	1.93913	0.121717	0.18748	-5.77937
CG8064	Q9VE98	CG8064	CG8064	Q9VE98	FALSE	0	-1.21952	-2.61826	0.179217	30.1218	-2.38379	0.0731545	0.12354	-5.22272
CG8108	Q9VT61	CG8108	CG8108	Q9VT61	FALSE	0	1.7458	1.08829	2.40332	30.0375	7.25948	0.00163717	0.00861011	-0.793404
CG8142	Q9VX15	CG8142	CG8142	Q9VX15	TRUE	1	0.868742	0.203694	1.53379	27.1261	3.57152	0.0218302	0.0517915	-3.84
CG8289	X2JFW6	CG8289	CG8289	X2JFW6	FALSE	0	0.878094	0.234523	1.52166	27.7462	3.73044	0.0188896	0.0462022	-3.67119
CG8414	A1ZA92	CG8414	CG8414	A1ZA92	FALSE	0	-0.63429	-1.70353	0.434946	29.7735	-1.62192	0.177352	0.250573	-6.17405
CG8478	Q961C3	CG8478	CG8478	Q961C3	TRUE	2	-0.266498	-0.785872	0.252876	27.8543	-1.40291	0.230647	0.308582	-6.43751
CG8545	A1Z909	CG8545	CG8545	A1Z909	FALSE	0	-0.40248	-1.42119	0.616228	30.4807	-1.08021	0.338614	0.410824	-6.79736
CG8611	Q86B47	CG8611	CG8611	Q86B47	FALSE	0	-0.638864	-1.38447	0.106739	28.6747	-2.3427	0.0765903	0.128571	-5.27374
CG8939	Q9VXK5	CG8939	CG8939	Q9VXK5	FALSE	0	-0.773313	-1.5446	-0.00202126	30.6348	-2.74127	0.0496226	0.0923137	-4.78604
CG9004	Q9W020	CG9004	CG9004	Q9W020	TRUE	2	-0.666979	-2.03664	0.702677	26.9664	-1.33142	0.251282	0.330902	-6.52073
CG9143	Q6NQY9	CG9143	CG9143	Q6NQY9	FALSE	0	0.00634284	-0.978819	0.991504	28.3591	0.0176032	0.986767	0.991845	-7.43255
CG9246	Q9VIF0	CG9246	CG9246	Q9VIF0	FALSE	0	-1.09333	-1.95474	-0.231919	30.2017	-3.47022	0.023988	0.0553425	-3.9497
CG9253	Q9VIF6	CG9253	CG9253	Q9VIF6	FALSE	0	-0.668305	-1.48758	0.15097	29.422	-2.23029	0.0869471	0.141925	-5.41395
CG9300	Q9VW10	CG9300	CG9300	Q9VW10	FALSE	0	-1.35188	-2.56609	-0.137679	30.0222	-3.04413	0.0363029	0.0749068	-4.42885
CG9684	Q9VHR5	CG9684	CG9684	Q9VHR5	FALSE	0	0.0197456	-0.759079	0.79857	28.4048	0.0693181	0.947939	0.956097	-7.42978
CG9775	Q9VN39	CG9775	CG9775	Q9VN39	FALSE	0	-1.94957	-2.59624	-1.30289	30.6294	-8.24268	0.000993178	0.00633802	-0.21125
CG9776	Q9V468	CG9776	CG9776	Q9V468	FALSE	0	0.311567	-0.213666	0.8368	30.129	1.62187	0.177364	0.250573	-6.17411
CG9799	Q9VFV8	CG9799	CG9799	Q9VFV8	FALSE	0	-1.19582	-2.3482	-0.0434378	30.0155	-2.83717	0.0448735	0.0857343	-4.67154
chb	Q9NBD7	chb	chb	Q9NBD7	FALSE	0	-0.681371	-1.95968	0.59694	28.6196	-1.45734	0.216059	0.291058	-6.3731
Chc	X2JC31	Chc	Chc	X2JC31	FALSE	0	-1.09446	-2.15151	-0.0374209	30.3703	-2.8309	0.0451675	0.085799	-4.67899
cher	Q9VEN1	cher	cher	Q9VEN1	FALSE	0	1.66452	-0.825257	4.15429	27.9401	1.82786	0.13877	0.207447	-5.91879
Chro	Q86BS3	Chro	Chro	Q86BS3	FALSE	0	2.06004	1.5029	2.61719	28.803	10.1094	0.000439326	0.00472937	0.724159
cindr	A0A0B4KI32	cindr	cindr	A0A0B4KI32	TRUE	2	1.04546	0.502129	1.58878	26.7298	5.2609	0.00559135	0.0190496	-2.23894
ck	G7H829	ck	ck	G7H829	TRUE	2	0.481953	-0.520908	1.48481	24.6656	1.31395	0.256592	0.334885	-6.54081
CkIalpha	E1JJI5	CkIalpha	CkIalpha	E1JJI5	FALSE	0	0.458635	-0.148682	1.06595	28.1718	2.06475	0.105137	0.165175	-5.62156
CkIIalpha	A4V2B8	CkIIalpha	CkIIalpha	A4V2B8	FALSE	0	0.117428	-0.356873	0.591729	30.475	0.676912	0.534216	0.598568	-7.16416
cmet	M9PFL9	cmet	cmet	M9PFL9	TRUE	2	-1.52588	-2.36291	-0.68886	25.8363	-4.98424	0.00682187	0.0217262	-2.47372
cnn	A1Z9D4	cnn	cnn	A1Z9D4	TRUE	2	-0.779898	-2.62029	1.0605	26.0224	-1.15862	0.308725	0.38642	-6.71408
coil	A0A0B4LEV8	coil	coil	A0A0B4LEV8	TRUE	1	2.9582	2.41704	3.49937	27.1583	14.9455	8.95863e-05	0.00201914	2.45983
Col4a1	P08120	Col4a1	Col4a1	P08120	FALSE	0	0.173002	-1.28615	1.63216	30.7345	0.324164	0.761451	0.803983	-7.36861
coro	Q7JVY0	coro	coro	Q7JVY0	FALSE	0	1.50804	0.411204	2.60488	27.2179	3.75912	0.0184102	0.0453294	-3.64115
Cpsf100	Q9V3D6	Cpsf100	Cpsf100	Q9V3D6	TRUE	2	1.38026	0.697067	2.06345	27.9365	5.52374	0.00466314	0.0166693	-2.02466
Cpsf160	Q9V726	Cpsf160	Cpsf160	Q9V726	FALSE	0	1.37141	0.349896	2.39292	28.1968	3.67061	0.019938	0.0477329	-3.73427
Cpsf73	Q9VE51	Cpsf73	Cpsf73	Q9VE51	TRUE	1	1.49578	0.171665	2.8199	27.1262	3.08857	0.0347197	0.0726633	-4.37756
crol.1	O61360	crol	crol	O61360	TRUE	1	3.29701	2.04721	4.54681	28.401	7.21264	0.00167909	0.00861011	-0.822984
CtBP	A4V2S3	CtBP	CtBP	A4V2S3	FALSE	0	1.19862	0.399949	1.99729	27.2951	4.10326	0.0136513	0.0361976	-3.29075
Ctf4	Q494K2	Ctf4	Ctf4	Q494K2	FALSE	0	-0.213601	-1.21141	0.784205	27.6137	-0.585291	0.588615	0.650808	-7.22933
ctp	M9NDP1	ctp	ctp	M9NDP1	FALSE	0	0.572757	-0.0373926	1.18291	27.619	2.56655	0.0598356	0.106577	-4.99769
Ctr9	Q7K0X3	Ctr9	Ctr9	Q7K0X3	FALSE	0	-0.305556	-0.84479	0.233678	29.7636	-1.54928	0.193486	0.267412	-6.26261
Cul4	Q5BI50	Cul4	Cul4	Q5BI50	TRUE	1	1.07104	0.28263	1.85946	27.9413	3.71423	0.0191672	0.046413	-3.68823
Cwc25	Q9VQF5	Cwc25	Cwc25	Q9VQF5	TRUE	2	-1.4356	-2.51139	-0.359815	25.5574	-3.64857	0.0203415	0.0484559	-3.75765
D19A	Q9VRV5	D19A	D19A	Q9VRV5	FALSE	0	2.24475	1.62097	2.86852	27.3917	9.83907	0.00048993	0.00472937	0.600455
Dbp45A	Q07886	Dbp45A	Dbp45A	Q07886	TRUE	1	-0.504316	-1.13125	0.122622	26.1874	-2.19934	0.0900645	0.146199	-5.45267
Dbp73D	P26802	Dbp73D	Dbp73D	P26802	FALSE	0	0.794743	-1.187	2.77649	28.0697	1.09646	0.332214	0.404735	-6.78036
Dd	Q9VRG7	Dd	Dd	Q9VRG7	TRUE	1	-1.1674	-1.66213	-0.672667	25.3391	-6.45156	0.00258668	0.0112281	-1.33007
defl	Q9VT41	defl	defl	Q9VT41	TRUE	1	0.326463	-0.440287	1.09321	27.1731	1.16411	0.306724	0.384883	-6.70813
deltaCOP	Q7K7G0	deltaCOP	deltaCOP	Q7K7G0	TRUE	2	-0.534291	-1.33096	0.262376	25.4107	-1.83365	0.137823	0.206558	-5.91156
dgt1	A0A0B4KHH6	dgt1	dgt1	A0A0B4KHH6	TRUE	2	1.48956	0.985322	1.99379	27.4812	8.0768	0.00107638	0.00662535	-0.304577
Dhc64C	M9PE73	Dhc64C	Dhc64C	M9PE73	TRUE	2	-0.45131	-1.63331	0.730688	28.3804	-1.04393	0.353302	0.425998	-6.8348
Dhx15	Q7K3M5	Dhx15	Dhx15	Q7K3M5	TRUE	1	0.746778	0.255309	1.23825	28.89	4.15442	0.0130764	0.0351503	-3.24021
dia	M9PDV1	dia	dia	M9PDV1	TRUE	1	0.710727	-0.597377	2.01883	27.5483	1.48551	0.208875	0.283993	-6.33946
Dis3l2	Q9W0T7	Dis3l2	Dis3l2	Q9W0T7	FALSE	0	0.870093	0.0394866	1.7007	26.5866	2.86408	0.0436359	0.084114	-4.63963
Dlc90F	Q94524	Dlc90F	Dlc90F	Q94524	TRUE	2	-0.544547	-1.06245	-0.0266477	26.1632	-2.87478	0.0431549	0.0834613	-4.62697
Dlg5	Q9VKG8	Dlg5	Dlg5	Q9VKG8	FALSE	0	1.0851	-1.47879	3.64898	28.296	1.15714	0.309268	0.38642	-6.71569
Doa	B7Z0R6	Doa	Doa	B7Z0R6	FALSE	0	-0.800516	-1.35949	-0.241545	29.6978	-3.91558	0.0160358	0.0412148	-3.47956
Dp1	Q7KN75	Dp1	Dp1	Q7KN75	TRUE	2	-0.386281	-0.951685	0.179123	26.235	-1.86793	0.132352	0.199379	-5.86867
dre4	Q8IRG6	dre4	dre4	Q8IRG6	FALSE	0	-0.495843	-1.22354	0.231851	31.1274	-1.86299	0.133126	0.20003	-5.87485
Dref	Q94883	Dref	Dref	Q94883	FALSE	0	2.02855	0.922206	3.13489	28.8336	5.01315	0.00667892	0.0215046	-2.44873
Droj2	Q9VFV9	Droj2	Droj2	Q9VFV9	FALSE	0	1.19174	0.199292	2.18418	27.7527	3.28314	0.0286706	0.0629249	-4.15658
E(bx)	M9PE12	E(bx)	E(bx)	M9PE12	FALSE	0	0.499534	-0.272998	1.27207	30.2666	1.76793	0.148995	0.221601	-5.99356
east	O46048	east	east	O46048	TRUE	1	1.892	1.38199	2.402	27.7487	10.1429	0.000433509	0.00472937	0.73925
Eb1	Q9XZ57	Eb1	Eb1	Q9XZ57	TRUE	2	2.11498	1.64019	2.58977	27.2531	12.1793	0.000206684	0.00321332	1.5653
eEF1alpha1	P08736	eEF1alpha1	eEF1alpha1	P08736	FALSE	0	-0.899229	-1.5997	-0.19876	31.1019	-3.50992	0.0231137	0.0540699	-3.90652
eEF1gamma	A0A0B4JD11	eEF1gamma	eEF1gamma	A0A0B4JD11	FALSE	0	-0.0176318	-0.478774	0.44351	28.7192	-0.104538	0.921586	0.935961	-7.426
eEF2	P13060	eEF2	eEF2	P13060	FALSE	0	-0.262845	-1.08686	0.561169	29.774	-0.872129	0.430556	0.502601	-7.00117
eIF2Bdelta	Q0E8X6	eIF2Bdelta	eIF2Bdelta	Q0E8X6	TRUE	2	-0.328682	-0.843811	0.186447	26.8897	-1.74452	0.153201	0.227281	-6.02267
eIF3a	Q9VN25	eIF3a	eIF3a	Q9VN25	FALSE	0	0.245009	-0.287764	0.777782	31.0658	1.25735	0.274546	0.355152	-6.6051
eIF3b	E2QCG7	eIF3b	eIF3b	E2QCG7	FALSE	0	1.56375	0.901774	2.22572	29.9814	6.45863	0.00257581	0.0112281	-1.32511
eIF3c	A0A0B4LFL2	eIF3c	eIF3c	A0A0B4LFL2	FALSE	0	0.335159	-0.22	0.890318	30.5891	1.65063	0.171364	0.244329	-6.1388
eIF3d1	Q9VCK0	eIF3d1	eIF3d1	Q9VCK0	FALSE	0	1.70847	1.07372	2.34322	28.8337	7.35899	0.00155229	0.00838038	-0.731156
eIF3e	O77410	eIF3e	eIF3e	O77410	FALSE	0	0.582763	0.0081663	1.15736	30.0091	2.77296	0.0479919	0.0898506	-4.74806
eIF3f1	Q9VN50	eIF3f1	eIF3f1	Q9VN50	FALSE	0	1.05615	0.592875	1.51943	28.1808	6.23303	0.00295207	0.0122689	-1.48558
eIF3h	Q9U9Q4	eIF3h	eIF3h	Q9U9Q4	FALSE	0	0.707194	0.193401	1.22099	28.7289	3.76327	0.018342	0.0453294	-3.63681
eIF3i	O02195	eIF3i	eIF3i	O02195	FALSE	0	1.57424	1.0936	2.05488	27.1169	8.95498	0.000714333	0.0054016	0.169251
eIF3k	Q9W2D9	eIF3k	eIF3k	Q9W2D9	FALSE	0	1.6679	1.03704	2.29876	27.5873	7.22855	0.0016647	0.00861011	-0.812912
eIF3l	Q9VTU4	eIF3l	eIF3l	Q9VTU4	FALSE	0	1.02033	0.452646	1.58801	29.8739	4.91417	0.00718401	0.022424	-2.53476
eIF3m	A0A0B4LFB3	eIF3m	eIF3m	A0A0B4LFB3	FALSE	0	2.48472	1.95849	3.01094	27.8997	12.9099	0.000163027	0.00278485	1.82381
eIF4A	C9QP42	eIF4A	eIF4A	C9QP42	FALSE	0	0.512785	-0.0752511	1.10082	27.0188	2.38422	0.0731194	0.12354	-5.22218
eIF4G1	O61380	eIF4G1	eIF4G1	O61380	FALSE	0	0.697602	-0.2147	1.6099	30.6117	2.09067	0.102032	0.160994	-5.589
eIF6	P56538	eIF6	eIF6	P56538	TRUE	2	-0.58411	-1.5095	0.341284	26.7501	-1.72577	0.15666	0.227891	-6.04595
Elys	X2JG50	Elys	Elys	X2JG50	FALSE	0	-0.787497	-1.66605	0.0910598	30.3263	-2.45072	0.0679223	0.117066	-5.13992
enok	Q9W1A9	enok	enok	Q9W1A9	TRUE	2	2.99791	2.47351	3.52231	26.6857	15.6304	7.45462e-05	0.00189931	2.64976
epsilonCOP	Q9Y0Y5	epsilonCOP	epsilonCOP	Q9Y0Y5	TRUE	1	0.0789699	-0.669883	0.827823	26.981	0.288324	0.786888	0.824896	-7.38188
fand	A1Z9G2	fand	fand	A1Z9G2	TRUE	1	0.789283	-0.0251942	1.60376	27.3408	2.64953	0.0547127	0.0996286	-4.8967
Fib	Q9W1V3	Fib	Fib	Q9W1V3	FALSE	0	0.193332	-0.301715	0.68838	32.7181	1.06776	0.343595	0.416005	-6.8103
Fkbp39	P54397	Fkbp39	Fkbp39	P54397	FALSE	0	-0.0959078	-0.640742	0.448926	33.309	-0.481288	0.654522	0.705054	-7.29345
fl(2)d	Q9Y091	fl(2)d	fl(2)d	Q9Y091	TRUE	2	2.94828	2.2926	3.60396	27.7499	12.294	0.000198949	0.00321332	1.60708
fliI	Q24020	fliI	fliI	Q24020	TRUE	2	0.423868	-0.438635	1.28637	27.4159	1.34365	0.24763	0.327103	-6.50662
Fmr1.1	A0A0B4K618	Fmr1	Fmr1	A0A0B4K618	FALSE	0	0.932468	0.338589	1.52635	31.3694	4.29291	0.0116596	0.0319744	-3.10541
Frl	Q9VUC6	Frl	Frl	Q9VUC6	TRUE	2	-0.435309	-1.1756	0.304978	27.392	-1.60773	0.180392	0.253501	-6.19142
fs(1)h	P13709	fs(1)h	fs(1)h	P13709	FALSE	0	3.17069	2.66414	3.67724	28.3552	17.1138	5.1358e-05	0.00173608	3.02611
Fs(2)Ket	M9NDC3	Fs(2)Ket	Fs(2)Ket	M9NDC3	FALSE	0	-0.542599	-1.19817	0.112976	29.7167	-2.26293	0.0837867	0.137532	-5.37314
Gale	M9ND19	Gale	Gale	M9ND19	TRUE	2	0.214281	-0.300911	0.729473	27.1333	1.13718	0.31665	0.393129	-6.73716
gammaCOP.1	A0A0B4KHL2	gammaCOP	gammaCOP	A0A0B4KHL2	FALSE	0	-0.497901	-1.61511	0.619303	31.5143	-1.2185	0.287549	0.367912	-6.64849
gammaTub23C	P23257	gammaTub23C	gammaTub23C	P23257	TRUE	2	1.24778	-0.166356	2.66192	25.2986	2.41247	0.0708589	0.120707	-5.18719
Ge-1	Q9VKK1	Ge-1	Ge-1	Q9VKK1	FALSE	0	-0.349559	-1.62115	0.922036	28.9633	-0.7516	0.492556	0.562647	-7.10546
Gfat2	Q9VAW3	Gfat2	Gfat2	Q9VAW3	TRUE	2	-1.25484	-2.41804	-0.091648	26.0972	-2.94953	0.039961	0.0792908	-4.53901
gfzf	Q6NP69	gfzf	gfzf	Q6NP69	FALSE	0	2.66837	1.91928	3.41746	28.6306	9.73929	0.000510409	0.00472937	0.55387
Glg1	Q9VP27	Glg1	Glg1	Q9VP27	TRUE	1	-0.138071	-0.630795	0.354653	26.3531	-0.766151	0.484727	0.556961	-7.09348
GluProRS	P28668	GluProRS	GluProRS	P28668	FALSE	0	0.989903	0.218334	1.76147	29.2144	3.50779	0.0231596	0.0540699	-3.90883
Gnf1	P35600	Gnf1	Gnf1	P35600	FALSE	0	0.38818	-0.226928	1.00329	29.8154	1.72543	0.156724	0.227891	-6.04637
Gp210	A1Z6H7	Gp210	Gp210	A1Z6H7	FALSE	0	-1.39487	-2.05872	-0.731014	33.4725	-5.74482	0.00402398	0.0150195	-1.85072
Grip71	Q9VJ57	Grip71	Grip71	Q9VJ57	TRUE	2	-1.66967	-2.29055	-1.04878	24.9119	-7.35248	0.00155768	0.00838038	-0.735208
Grip84	E1JJQ4	Grip84	Grip84	E1JJQ4	TRUE	2	-0.79698	-2.05093	0.456972	26.1243	-1.73773	0.154444	0.227398	-6.03111
Grip91	Q9XYP8	Grip91	Grip91	Q9XYP8	TRUE	2	-0.882104	-1.98532	0.221108	25.6187	-2.18613	0.0914333	0.148011	-5.46923
Hcf	Q9V4C8	Hcf	Hcf	Q9V4C8	FALSE	0	1.44147	0.94457	1.93837	28.7773	7.93144	0.00115643	0.00691496	-0.387921
HDAC1	Q94517	HDAC1	HDAC1	Q94517	TRUE	2	1.81235	1.29574	2.32897	27.7821	9.59159	0.000542698	0.00472937	0.483976
hfp	Q8T6B9	hfp	hfp	Q8T6B9	FALSE	0	0.331323	-0.294401	0.957047	28.2828	1.44772	0.21857	0.293766	-6.38455
HIPP1	M9PID3	HIPP1	HIPP1	M9PID3	FALSE	0	1.42904	0.796285	2.0618	27.1765	6.17481	0.00305985	0.0126273	-1.52781
His1:CG33861	Q4AB54	His1:CG33861	His1:CG33861	Q4AB54	FALSE	0	-0.37325	-0.843017	0.096517	32.9195	-2.17236	0.0928839	0.149945	-5.48648
His2A:CG33859	Q4AB57	His2A:CG33859	His2A:CG33859	Q4AB57	FALSE	0	-1.14584	-1.63127	-0.660401	31.3814	-6.45366	0.00258344	0.0112281	-1.32859
His2Av	A0A0B4KH25	His2Av	His2Av	A0A0B4KH25	FALSE	0	1.79172	0.996293	2.58716	33.0455	6.15862	0.00309067	0.0126644	-1.53962
His2B:CG17949	P02283	His2B:CG17949	His2B:CG17949	P02283	FALSE	0	-0.940184	-1.4056	-0.474765	34.3479	-5.52311	0.00466513	0.0166693	-2.02517
His3:CG31613	P02299	His3:CG31613	His3:CG31613	P02299	FALSE	0	-0.937781	-1.44705	-0.428516	34.9275	-5.03469	0.00657477	0.0213534	-2.43018
His4r	A0A0B4KFZ9	His4r	His4r	A0A0B4KFZ9	FALSE	0	-0.996753	-1.47804	-0.515471	35.446	-5.66244	0.00424891	0.0156595	-1.91489
Hlc	Q9VRI0	Hlc	Hlc	Q9VRI0	FALSE	0	0.691722	-0.401874	1.78532	28.0191	1.72938	0.155988	0.227891	-6.04147
Hmr	Q86CW5	Hmr	Hmr	Q86CW5	TRUE	2	2.19749	0.911699	3.48329	26.065	4.67274	0.00862295	0.0252652	-2.7501
hoip	D2NUK9	hoip	hoip	D2NUK9	FALSE	0	0.700484	0.217422	1.18355	29.8382	3.96471	0.0153666	0.0398033	-3.42961
Hpr1	Q9VNI8	Hpr1	Hpr1	Q9VNI8	FALSE	0	1.53893	0.90477	2.17309	28.0268	6.6349	0.00232197	0.0106806	-1.20314
Hrb87F	E1JIK0	Hrb87F	Hrb87F	E1JIK0	FALSE	0	3.97085	3.38201	4.55968	30.1566	18.4376	3.77901e-05	0.00173608	3.32636
Hsc70-3	F3YDH0	Hsc70-3	Hsc70-3	F3YDH0	FALSE	0	1.64549	0.642808	2.64817	27.8073	4.48691	0.00997163	0.0282289	-2.92134
Hsc70-4	C7LA75	Hsc70-4	Hsc70-4	C7LA75	FALSE	0	0.0476804	-0.465747	0.561107	31.8522	0.253908	0.811617	0.843276	-7.39321
Hsc70-5	A0A0B4LFD2	Hsc70-5	Hsc70-5	A0A0B4LFD2	FALSE	0	-2.64942	-3.38296	-1.91589	26.4749	-9.87523	0.000482759	0.00472937	0.617212
Hsp83	M9PBL3	Hsp83	Hsp83	M9PBL3	FALSE	0	-0.536838	-1.4644	0.390728	28.881	-1.58239	0.185953	0.260068	-6.22236
hts	A0A0B4K849	hts	hts	A0A0B4K849	TRUE	1	3.28597	2.73056	3.84139	27.907	16.1757	6.47541e-05	0.00178085	2.79342
hyx	Q9VHI1	hyx	hyx	Q9VHI1	FALSE	0	2.28243	1.59138	2.97348	27.4782	9.03028	0.000690851	0.00539785	0.207666
Ibf1	A0A0B4LGV6	Ibf1	Ibf1	A0A0B4LGV6	FALSE	0	1.27305	0.756919	1.78917	28.4476	6.74377	0.00218041	0.0104731	-1.12926
Ibf2	Q9VHG6	Ibf2	Ibf2	Q9VHG6	TRUE	2	0.232234	-0.263568	0.728037	27.6291	1.28066	0.267012	0.34617	-6.57878
IleRS	Q8MSW0	IleRS	IleRS	Q8MSW0	FALSE	0	-0.358465	-1.07791	0.360975	30.0034	-1.36228	0.242161	0.322515	-6.48501
Imp	Q9VZ69	Imp	Imp	Q9VZ69	TRUE	1	1.56729	1.07188	2.0627	27.439	8.64972	0.000820203	0.00579083	0.0100619
IntS1	Q9W1C5	IntS1	IntS1	Q9W1C5	FALSE	0	1.20802	-0.0629246	2.47897	28.6329	2.59874	0.057786	0.103873	-4.95842
IntS11	Q9VAH9	IntS11	IntS11	Q9VAH9	FALSE	0	-0.060884	-0.582325	0.460558	26.9207	-0.319237	0.764928	0.806201	-7.37053
IntS2	Q9VX31	IntS2	IntS2	Q9VX31	FALSE	0	0.921433	-0.172683	2.01555	27.3259	2.30259	0.0801193	0.133002	-5.32367
IntS3	Q7PLS8	IntS3	IntS3	Q7PLS8	FALSE	0	0.507532	-0.639354	1.65442	29.2863	1.20993	0.290497	0.370046	-6.65798
IntS4	Q9W3E1	IntS4	IntS4	Q9W3E1	TRUE	1	1.17604	0.578139	1.77394	27.0146	5.37786	0.00515299	0.0179741	-2.14257
IntS6	Q9W485	IntS6	IntS6	Q9W485	TRUE	1	1.38035	0.721651	2.03906	26.9449	5.72949	0.00406473	0.0150755	-1.8626
Ip259	O76994	Ip259	Ip259	O76994	FALSE	0	-1.32924	-1.87766	-0.780815	28.5679	-6.62679	0.00233296	0.0106806	-1.2087
Iswi	Q24368	Iswi	Iswi	Q24368	FALSE	0	0.227735	-0.412501	0.867971	30.7181	0.972533	0.383844	0.457179	-6.90624
Jafrac1	X2JF59	Jafrac1	Jafrac1	X2JF59	TRUE	1	1.38085	0.755976	2.00572	28.0668	6.04185	0.00332454	0.013075	-1.62556
Jasper	Q9VAA9	Jasper	Jasper	Q9VAA9	FALSE	0	2.85159	2.11807	3.5851	27.6595	10.629	0.000358929	0.0042925	0.952221
JIL-1	M9PI05	JIL-1	JIL-1	M9PI05	FALSE	0	2.81675	2.13223	3.50126	28.9937	11.2507	0.000285187	0.0038865	1.20952
Kap-alpha3	Q9V455	Kap-alpha3	Kap-alpha3	Q9V455	TRUE	1	0.919279	0.0276369	1.81092	27.6035	2.81885	0.0457386	0.0861828	-4.69331
Karybeta3	Q9VN44	Karybeta3	Karybeta3	Q9VN44	TRUE	2	1.90741	1.03079	2.78402	24.5225	5.9491	0.00352581	0.0135929	-1.69485
Klp10A	A4V4A1	Klp10A	Klp10A	A4V4A1	FALSE	0	-0.207394	-1.32489	0.9101	27.6988	-0.507418	0.637568	0.691879	-7.27837
Klp61F	P46863	Klp61F	Klp61F	P46863	FALSE	0	-0.825787	-1.70717	0.0555908	31.1133	-2.56166	0.0601541	0.106819	-5.00367
Klp67A	Q9VSW5	Klp67A	Klp67A	Q9VSW5	FALSE	0	0.918898	0.307059	1.53074	27.572	4.10625	0.0136169	0.0361976	-3.28779
koi	A0A0B4KEE4	koi	koi	A0A0B4KEE4	FALSE	0	1.00899	-0.231601	2.24958	29.9113	2.22369	0.0876018	0.142596	-5.4222
kst	Q9VZQ3	kst	kst	Q9VZQ3	FALSE	0	0.907446	-1.86036	3.67525	28.2672	0.896397	0.418856	0.490899	-6.97886
kz	X2JCE0	kz	kz	X2JCE0	FALSE	0	0.525015	-0.904816	1.95485	29.2005	1.00393	0.370145	0.443568	-6.8752
l(1)G0004	Q9VR89	l(1)G0004	l(1)G0004	Q9VR89	TRUE	1	0.0168057	-0.509382	0.542994	26.9629	0.0873234	0.934455	0.944121	-7.42804
l(1)G0020	Q9W3C1	l(1)G0020	l(1)G0020	Q9W3C1	FALSE	0	-1.08847	-2.06198	-0.114953	31.1564	-3.05695	0.0358376	0.0742079	-4.41402
l(2)05287	Q9VIG1	l(2)05287	l(2)05287	Q9VIG1	FALSE	0	-1.19638	-2.27692	-0.115829	30.7221	-3.02719	0.0369284	0.0756645	-4.44848
l(2)34Fd	Q9V3P2	l(2)34Fd	l(2)34Fd	Q9V3P2	FALSE	0	-0.349176	-2.20962	1.51126	28.4967	-0.513149	0.633884	0.690438	-7.27497
l(2)k09022	Q9VM75	l(2)k09022	l(2)k09022	Q9VM75	FALSE	0	-1.34694	-2.60942	-0.0844557	32.3495	-2.91701	0.0413157	0.081245	-4.57718
l(2)k09848	Q7K4B2	l(2)k09848	l(2)k09848	Q7K4B2	FALSE	0	-0.289418	-0.995915	0.417079	28.2316	-1.12003	0.323123	0.398632	-6.75546
l(3)07882	A0A126GUW2	l(3)07882	l(3)07882	A0A126GUW2	FALSE	0	0.504622	-1.22027	2.22952	29.0605	0.799868	0.466948	0.538644	-7.06505
l(3)72Ab	Q9VUV9	l(3)72Ab	l(3)72Ab	Q9VUV9	FALSE	0	-0.809003	-1.39561	-0.222395	32.6245	-3.77066	0.0182214	0.0452446	-3.6291
l(3)72Dn	Q9VUZ6	l(3)72Dn	l(3)72Dn	Q9VUZ6	FALSE	0	-1.11287	-2.22849	0.00274612	29.111	-2.72738	0.0503575	0.0933845	-4.80273
Lam	M9NE89	Lam	Lam	M9NE89	FALSE	0	0.954127	0.396358	1.5119	32.7949	4.677	0.00859467	0.0252652	-2.74622
lark	Q94901	lark	lark	Q94901	FALSE	0	2.6755	1.77191	3.5791	29.4229	8.09558	0.00106654	0.00662535	-0.293919
larp	Q9VAW5	larp	larp	Q9VAW5	FALSE	0	1.39121	0.876429	1.90599	29.66	7.38902	0.00152775	0.00838038	-0.712532
LBR	Q8MLV1	LBR	LBR	Q8MLV1	FALSE	0	-0.852328	-1.72552	0.0208598	27.3561	-2.66879	0.0535964	0.0984561	-4.87338
lds	P34739	lds	lds	P34739	FALSE	0	1.84037	1.19359	2.48714	27.5217	7.77978	0.00124787	0.00727411	-0.476473
lost	Q9VN21	lost	lost	Q9VN21	FALSE	0	-0.514727	-0.979007	-0.0504466	29.4377	-3.03118	0.0367798	0.0756244	-4.44384
lva	X2JAF1	lva	lva	X2JAF1	FALSE	0	-0.644066	-2.26059	0.97246	31.4253	-1.08934	0.335007	0.40729	-6.78783
M1BP	Q9VHM3	M1BP	M1BP	Q9VHM3	TRUE	2	2.90233	2.16627	3.63838	28.6403	10.7808	0.00033894	0.00413789	1.01656
Mad1	Q7KND8	Mad1	Mad1	Q7KND8	TRUE	1	0.275844	-0.635777	1.18746	27.0532	0.827302	0.452857	0.524455	-7.04126
mahe	Q9W3M7	mahe	mahe	Q9W3M7	TRUE	2	3.59782	3.09531	4.10033	27.3601	19.5753	2.95231e-05	0.00173608	3.56109
MAN1	Q7JRE4	MAN1	MAN1	Q7JRE4	TRUE	2	-0.111749	-0.894181	0.670682	27.8074	-0.390494	0.715335	0.760773	-7.3402
mars	E1JH57	mars	mars	E1JH57	FALSE	0	0.934749	0.289499	1.58	27.4528	3.9608	0.0154187	0.0398033	-3.43357
mask	A0A0B4KHR8	mask	mask	A0A0B4KHR8	TRUE	1	1.76278	0.334558	3.191	27.2678	3.37457	0.0262596	0.0596265	-4.05478
Mat89Ba	Q8IH00	Mat89Ba	Mat89Ba	Q8IH00	FALSE	0	-0.11197	-1.9225	1.69856	29.7733	-0.169088	0.873627	0.89815	-7.41514
MBD-R2	Q9VGA4	MBD-R2	MBD-R2	Q9VGA4	FALSE	0	1.76694	1.23445	2.29942	28.3426	9.07256	0.000678082	0.00536968	0.229091
mbo	Q9GYU8	mbo	mbo	Q9GYU8	FALSE	0	-0.717695	-1.50388	0.0684893	28.9672	-2.49592	0.0646279	0.11238	-5.08425
Mccc1	Q9V9T5	Mccc1	Mccc1	Q9V9T5	FALSE	0	-7.4775	-8.18162	-6.77338	30.3907	-29.0352	5.77897e-06	0.00169324	4.9281
me31B	P23128	me31B	me31B	P23128	FALSE	0	-0.383851	-1.22576	0.458055	27.6081	-1.24656	0.278099	0.358955	-6.61721
mEFTu1	A1Z9E3	mEFTu1	mEFTu1	A1Z9E3	FALSE	0	-1.57546	-2.1099	-1.04102	27.9078	-8.0598	0.00108538	0.00662535	-0.314247
MEP-1	Q0E8J0	MEP-1	MEP-1	Q0E8J0	TRUE	2	1.65867	1.19094	2.1264	26.5994	9.69573	0.000519679	0.00472937	0.533376
MetRS	A1ZBE9	MetRS	MetRS	A1ZBE9	TRUE	1	1.73259	1.0054	2.45977	27.8772	6.51427	0.00249218	0.0112281	-1.2863
Mi-2	M9PIA6	Mi-2	Mi-2	M9PIA6	FALSE	0	-0.215397	-1.18403	0.753237	30.0625	-0.607988	0.574809	0.637951	-7.21392
mip130	Q9W542	mip130	mip130	Q9W542	TRUE	1	3.08894	2.61932	3.55856	28.0265	17.9837	4.1877e-05	0.00173608	3.22687
Mlc-c	P54357	Mlc-c	Mlc-c	P54357	TRUE	2	2.28059	1.25087	3.31032	28.3894	6.0554	0.00329633	0.0130517	-1.61552
mle	P24785	mle	mle	P24785	TRUE	1	3.2343	2.76819	3.70042	28.2239	18.9715	3.35957e-05	0.00173608	3.43902
Moca-cyp	Q9VAW1	Moca-cyp	Moca-cyp	Q9VAW1	FALSE	0	-0.16397	-0.742928	0.414988	28.4236	-0.774343	0.480361	0.553028	-7.08665
mod	A0A0B4K7G4	mod	mod	A0A0B4K7G4	FALSE	0	-0.494667	-1.20739	0.218057	30.5922	-1.89761	0.127802	0.19352	-5.83147
mre11	Q9XYZ4	mre11	mre11	Q9XYZ4	FALSE	0	0.31517	-0.231537	0.861878	27.1541	1.57618	0.187343	0.261388	-6.22993
msk	Q9VSD6	msk	msk	Q9VSD6	TRUE	2	-1.84229	-2.70003	-0.984555	25.4684	-5.87246	0.00370341	0.0140013	-1.7528
msn	Q9W002	msn	msn	Q9W002	FALSE	0	-0.00572373	-1.65211	1.64067	28.8098	-0.00950521	0.992854	0.994551	-7.43269
Msp300.1	M9MRJ4	Msp300	Msp300	M9MRJ4	FALSE	0	2.79839	1.04014	4.55664	29.5326	4.35154	0.0111156	0.0310178	-3.0492
msps	Q9VEZ3	msps	msps	Q9VEZ3	TRUE	1	-0.188804	-1.73387	1.35626	28.8122	-0.334103	0.754459	0.799481	-7.36467
mtgo	Q9VJJ8	mtgo	mtgo	Q9VJJ8	TRUE	2	0.647755	-0.394643	1.69015	25.8738	1.699	0.161742	0.232306	-6.07911
Mtor	A0A0B4KFE9	Mtor	Mtor	A0A0B4KFE9	FALSE	0	-0.92482	-1.39043	-0.459211	32.6729	-5.43064	0.00496886	0.017647	-2.09961
Mtpalpha	Q8IPE8	Mtpalpha	Mtpalpha	Q8IPE8	FALSE	0	-2.41568	-3.52223	-1.30913	27.1132	-5.96875	0.00348196	0.0135929	-1.6801
Mtpbeta	Q9W1H8	Mtpbeta	Mtpbeta	Q9W1H8	TRUE	2	-2.18991	-2.78337	-1.59645	25.6282	-10.089	0.000442901	0.00472937	0.714978
Mtr4	Q9Y134	Mtr4	Mtr4	Q9Y134	FALSE	0	0.796581	-0.61889	2.21205	27.7271	1.53867	0.195965	0.270201	-6.27546
mTTF	Q9V3F3	mTTF	mTTF	Q9V3F3	TRUE	2	0.615045	0.113045	1.11704	26.4963	3.3498	0.0268884	0.0603087	-4.08223
mud	M9PJN0	mud	mud	M9PJN0	FALSE	0	0.669922	-1.88466	3.2245	27.9555	0.717002	0.511549	0.579822	-7.13325
mxc	Q9W363	mxc	mxc	Q9W363	FALSE	0	1.47197	0.666575	2.27736	29.19	4.99696	0.00675856	0.0216421	-2.46272
Mybbp1A	Q9W5E4	Mybbp1A	Mybbp1A	Q9W5E4	FALSE	0	-1.03668	-2.10668	0.0333119	30.8818	-2.64899	0.0547447	0.0996286	-4.89736
Myo31DF	Q23978	Myo31DF	Myo31DF	Q23978	FALSE	0	0.533134	-1.0027	2.06896	28.1813	0.949092	0.394352	0.467794	-6.929
Mys45A	Q7KKH3	Mys45A	Mys45A	Q7KKH3	TRUE	1	-0.261794	-0.803067	0.279478	26.9604	-1.32239	0.254014	0.333003	-6.53113
NAT1	A1Z968	NAT1	NAT1	A1Z968	TRUE	2	2.96136	2.46374	3.45897	27.3375	16.2709	6.32122e-05	0.00178085	2.81784
ncd	A0A0B4LI25	ncd	ncd	A0A0B4LI25	FALSE	0	0.0121982	-0.820864	0.84526	29.5723	0.0400343	0.969913	0.976579	-7.43175
ncm	Q9VJ87	ncm	ncm	Q9VJ87	FALSE	0	-1.36176	-1.92149	-0.802038	30.7877	-6.65185	0.00229921	0.0106806	-1.19157
Ndc1	Q9VCG4	Ndc1	Ndc1	Q9VCG4	TRUE	1	-1.64387	-2.37984	-0.90789	27.4994	-6.10687	0.00319177	0.012811	-1.57754
Ndf	X2JDP6	Ndf	Ndf	X2JDP6	FALSE	0	0.329295	-0.141199	0.799789	30.7709	1.91358	0.125424	0.190905	-5.81144
nesd	Q9VIP0	nesd	nesd	Q9VIP0	TRUE	2	-0.634691	-1.2439	-0.0254845	27.014	-2.84848	0.0443484	0.0852072	-4.65811
Nipped-A	Q8I8U7	Nipped-A	Nipped-A	Q8I8U7	FALSE	0	-0.0749254	-0.596764	0.446913	28.7665	-0.392562	0.713918	0.760648	-7.33924
nito	Q7KMJ6	nito	nito	Q7KMJ6	FALSE	0	2.57821	1.18883	3.96759	28.9176	5.07357	0.0063917	0.0209578	-2.39685
Nnp-1	Q9VJZ7	Nnp-1	Nnp-1	Q9VJZ7	FALSE	0	0.218679	-0.843883	1.28124	28.7812	0.56269	0.602573	0.663737	-7.24419
NO66	E2QD64	NO66	NO66	E2QD64	FALSE	0	0.807825	-0.908007	2.52366	28.5341	1.28724	0.264921	0.344221	-6.57131
Non1	A0A0B4LEY9	Non1	Non1	A0A0B4LEY9	FALSE	0	-0.78272	-1.52336	-0.0420779	30.7904	-2.88944	0.0425061	0.082569	-4.60966
Non3	Q9VEB3	Non3	Non3	Q9VEB3	FALSE	0	-0.53291	-1.03732	-0.028504	29.7346	-2.88861	0.0425425	0.082569	-4.61064
nonA	X2JFR1	nonA	nonA	X2JFR1	FALSE	0	1.98547	0.628444	3.3425	28.0081	4.00028	0.0149029	0.038987	-3.39368
nop5	Q9VM69	nop5	nop5	Q9VM69	FALSE	0	0.104123	-0.404108	0.612354	32.3826	0.560147	0.604156	0.664232	-7.24583
Nop56	Q95WY3	Nop56	Nop56	Q95WY3	FALSE	0	-0.234455	-0.77224	0.303329	31.7991	-1.19197	0.296758	0.375101	-6.67775
Nop60B	O44081	Nop60B	Nop60B	O44081	FALSE	0	-0.321176	-0.975058	0.332707	31.9376	-1.34294	0.247839	0.327103	-6.50743
Nopp140	Q7KTV5	Nopp140	Nopp140	Q7KTV5	FALSE	0	-0.969139	-1.85062	-0.0876608	27.9075	-3.00601	0.0377282	0.076237	-4.47308
Ns1	Q8MT06	Ns1	Ns1	Q8MT06	FALSE	0	-0.307073	-0.86161	0.247464	30.3637	-1.514	0.201852	0.277014	-6.30524
Ns2	Q7JXU4	Ns2	Ns2	Q7JXU4	FALSE	0	0.723431	-0.259441	1.7063	29.6639	2.01241	0.111727	0.174592	-5.68733
Nup107	Q9V466	Nup107	Nup107	Q9V466	FALSE	0	-0.908032	-1.52128	-0.294786	30.9216	-4.04838	0.0143019	0.0377519	-3.34539
Nup133	Q9VCW3	Nup133	Nup133	Q9VCW3	FALSE	0	-1.10605	-1.73763	-0.474476	31.0177	-4.78812	0.00789571	0.0237276	-2.64619
Nup153	Q9VXE6	Nup153	Nup153	Q9VXE6	FALSE	0	1.42238	-0.163086	3.00785	28.7597	2.45287	0.0677619	0.117066	-5.13728
Nup154	Q9V463	Nup154	Nup154	Q9V463	FALSE	0	-1.28253	-1.97961	-0.585449	31.3162	-5.03037	0.0065955	0.0213534	-2.43389
Nup160	X2J9F3	Nup160	Nup160	X2J9F3	FALSE	0	-1.29422	-2.02606	-0.562381	31.2045	-4.83512	0.00762077	0.0232592	-2.60439
Nup188	A0A0B4K859	Nup188	Nup188	A0A0B4K859	FALSE	0	-1.24231	-1.98323	-0.501395	30.1118	-4.58433	0.0092352	0.0265286	-2.83095
Nup205	Q8IQV9	Nup205	Nup205	Q8IQV9	FALSE	0	-1.35372	-2.04924	-0.658198	32.089	-5.3215	0.00535882	0.0184722	-2.1888
Nup214	Q9W1X4	Nup214	Nup214	Q9W1X4	FALSE	0	-0.1981	-1.72371	1.32751	28.3678	-0.355023	0.739833	0.785402	-7.35601
Nup358	A0A0B4K7J2	Nup358	Nup358	A0A0B4K7J2	FALSE	0	-0.770035	-1.66475	0.124684	32.8612	-2.35309	0.0757044	0.127479	-5.26082
Nup37	Q9VBU8	Nup37	Nup37	Q9VBU8	TRUE	1	-0.0342481	-0.76596	0.697464	27.1105	-0.127971	0.904117	0.92463	-7.42264
Nup43	Q9VE85	Nup43	Nup43	Q9VE85	FALSE	0	-0.000216089	-0.95003	0.949598	28.7297	-0.000622027	0.999532	0.999532	-7.43274
Nup44A	Q7K2X8	Nup44A	Nup44A	Q7K2X8	FALSE	0	-0.296827	-1.18094	0.58729	29.0453	-0.917929	0.408695	0.480914	-6.95871
Nup50	Q7K0D8	Nup50	Nup50	Q7K0D8	FALSE	0	-0.459134	-1.18955	0.271281	29.3837	-1.71864	0.157997	0.228614	-6.05479
Nup75	A1YK02	Nup75	Nup75	A1YK02	FALSE	0	-0.807633	-1.53998	-0.0752898	30.4902	-3.01519	0.037379	0.0760558	-4.4624
Nup93-1	Q9XZ06	Nup93-1	Nup93-1	Q9XZ06	FALSE	0	-1.06897	-1.90704	-0.230908	30.5871	-3.48742	0.0236045	0.0548898	-3.93096
Nup93-2	Q9VFE7	Nup93-2	Nup93-2	Q9VFE7	FALSE	0	-0.83262	-1.66069	-0.0045488	29.4159	-2.74912	0.0492126	0.0918426	-4.77661
Nup98-96	Q9VCH5	Nup98-96	Nup98-96	Q9VCH5	FALSE	0	-0.195167	-0.950897	0.560563	30.7815	-0.706083	0.517653	0.584479	-7.1418
obe	Q9VF56	obe	obe	Q9VF56	TRUE	2	1.50593	0.269084	2.74277	25.6296	3.32893	0.027432	0.0611222	-4.10543
omd	Q9VFS6	omd	omd	Q9VFS6	TRUE	1	0.326344	-0.716907	1.3696	27.2872	0.855269	0.438838	0.509226	-7.01642
Orc1	O16810	Orc1	Orc1	O16810	TRUE	1	1.27584	0.791426	1.76026	26.889	7.20101	0.0016897	0.00861011	-0.830356
OstDelta	Q7K110	OstDelta	OstDelta	Q7K110	FALSE	0	-0.957418	-1.56672	-0.348111	27.4799	-4.29616	0.0116286	0.0319744	-3.10228
Ostgamma	Q8SY53	Ostgamma	Ostgamma	Q8SY53	FALSE	0	-0.424823	-1.14117	0.291521	26.5934	-1.62144	0.177454	0.250573	-6.17463
Ote	P20240	Ote	Ote	P20240	FALSE	0	3.96983	3.40206	4.53761	30.2757	19.1166	3.25561e-05	0.00173608	3.46888
pAbp	P21187	pAbp	pAbp	P21187	FALSE	0	0.579171	0.0478671	1.11048	31.4026	2.98043	0.0387208	0.0774416	-4.50288
Patronin	A0A0B4KG58	Patronin	Patronin	A0A0B4KG58	TRUE	1	1.84893	-0.718383	4.41624	27.9362	1.96905	0.117526	0.182679	-5.7418
pav	Q9VZF5	pav	pav	Q9VZF5	FALSE	0	-0.860326	-1.8741	0.153445	30.5654	-2.32027	0.0785416	0.130754	-5.30165
PCB	Q7KN97	PCB	PCB	Q7KN97	TRUE	2	-10.0333	-10.7537	-9.31287	28.4373	-38.0787	1.87583e-06	0.00109924	5.65517
pcm	Q9VWI1	pcm	pcm	Q9VWI1	TRUE	2	1.58422	0.765997	2.40243	26.4757	5.29371	0.00546396	0.0187244	-2.21173
pea	A1Z9L3	pea	pea	A1Z9L3	TRUE	1	-0.327711	-1.07985	0.424427	27.4438	-1.19127	0.297008	0.375101	-6.67853
Pen	P52295	Pen	Pen	P52295	TRUE	1	2.73574	1.20962	4.26186	28.1068	4.90119	0.0072536	0.0224847	-2.54613
peng	O61345	peng	peng	O61345	FALSE	0	0.51513	-0.159003	1.18926	28.9359	2.08923	0.102201	0.160994	-5.5908
Pep	P41073	Pep	Pep	P41073	FALSE	0	2.99468	2.51186	3.47751	31.8593	16.9581	5.33266e-05	0.00173608	2.98867
Pex14	Q9VPB8	Pex14	Pex14	Q9VPB8	TRUE	2	-0.659414	-1.24173	-0.0771012	27.2758	-3.09612	0.0344588	0.0726362	-4.36888
Pgam5	O46084	Pgam5	Pgam5	O46084	FALSE	0	-0.0461348	-0.971074	0.878805	28.0883	-0.136374	0.897868	0.919844	-7.42128
pic	Q9XYZ5	pic	pic	Q9XYZ5	FALSE	0	-0.176602	-0.949523	0.596318	28.9994	-0.624707	0.564777	0.628297	-7.20225
pit	A0A0B4LHF7	pit	pit	A0A0B4LHF7	FALSE	0	-0.751323	-1.62905	0.126405	30.8613	-2.34036	0.0767915	0.128571	-5.27665
Plp	M9PFP4	Plp	Plp	M9PFP4	TRUE	1	-0.842886	-3.05641	1.37064	26.6636	-1.04112	0.354465	0.426522	-6.83767
Pnn	Q9VH84	Pnn	Pnn	Q9VH84	TRUE	2	1.7687	1.06073	2.47667	26.8545	6.83051	0.00207511	0.0100848	-1.07116
polybromo	Q9VC36	polybromo	polybromo	Q9VC36	TRUE	1	3.07583	2.55188	3.59979	27.8491	16.0503	6.68578e-05	0.00178085	2.76096
pont	Q9VH07	pont	pont	Q9VH07	FALSE	0	1.02401	0.554016	1.494	28.5127	5.95701	0.00350806	0.0135929	-1.6889
Pp1-87B	P12982	Pp1-87B	Pp1-87B	P12982	FALSE	0	-0.340237	-0.897592	0.217117	29.411	-1.66904	0.167634	0.240179	-6.11612
ppan	Q9VDE5	ppan	ppan	Q9VDE5	FALSE	0	-0.580051	-1.2115	0.051395	30.0599	-2.51157	0.0635297	0.111323	-5.06503
Prp19	Q7KLW9	Prp19	Prp19	Q7KLW9	FALSE	0	0.380025	-0.255508	1.01556	31.1259	1.63489	0.174619	0.248366	-6.15813
Prp38	Q7JVL3	Prp38	Prp38	Q7JVL3	FALSE	0	0.373379	-0.162112	0.90887	27.7583	1.9064	0.126488	0.192025	-5.82045
Prp8	A1Z8U0	Prp8	Prp8	A1Z8U0	FALSE	0	-0.614699	-1.28466	0.0552643	32.3236	-2.50857	0.0637384	0.111323	-5.06871
PyK	O62619	PyK	PyK	O62619	TRUE	1	-1.68408	-2.65501	-0.713154	25.3627	-4.74233	0.00817509	0.0243178	-2.68721
pzg	Q9VP57	pzg	pzg	Q9VP57	FALSE	0	2.16988	1.53193	2.80783	29.6256	9.29957	0.000614276	0.00499953	0.342396
qkr58E-1	Q9W255	qkr58E-1	qkr58E-1	Q9W255	FALSE	0	4.25754	3.45558	5.0595	29.3945	14.5152	0.00010098	0.00211336	2.33469
r	X2JFG0	r	r	X2JFG0	TRUE	1	-0.25564	-0.995708	0.484428	26.4717	-0.944438	0.396467	0.469353	-6.93348
Rack1	O18640	Rack1	Rack1	O18640	FALSE	0	0.595852	0.0989078	1.0928	30.1039	3.27828	0.0288058	0.0629766	-4.16202
rad50	A0A0B4K7L0	rad50	rad50	A0A0B4K7L0	FALSE	0	-0.263981	-0.739058	0.211095	29.5694	-1.51924	0.200588	0.275926	-6.29893
Rae1	Q9W2E7	Rae1	Rae1	Q9W2E7	FALSE	0	1.62113	0.918145	2.32412	27.1574	6.30503	0.00282511	0.0119102	-1.43382
RAF2	Q9VV52	RAF2	RAF2	Q9VV52	FALSE	0	0.273554	-0.293685	0.840794	30.8582	1.31854	0.255188	0.333796	-6.53555
Ran	A4V4A5	Ran	Ran	A4V4A5	TRUE	2	-0.15404	-0.748987	0.440906	26.2526	-0.707901	0.516634	0.584454	-7.14039
RanGAP	Q9VIW3	RanGAP	RanGAP	Q9VIW3	FALSE	0	1.20909	0.213104	2.20508	29.796	3.3191	0.0276924	0.0614688	-4.11638
Rbcn-3A	Q9W425	Rbcn-3A	Rbcn-3A	Q9W425	TRUE	2	0.16187	-0.547071	0.870811	29.2221	0.624269	0.565038	0.628297	-7.20256
Rbm13	Q9W3B2	Rbm13	Rbm13	Q9W3B2	TRUE	1	1.68533	1.1976	2.17306	27.2742	9.44762	0.000576623	0.00477753	0.414749
Rbp1	Q02427	Rbp1	Rbp1	Q02427	FALSE	0	0.211075	-0.311718	0.733868	29.6807	1.10388	0.329328	0.402894	-6.77256
Rcd1	Q8T076	Rcd1	Rcd1	Q8T076	TRUE	1	2.22665	1.51065	2.94266	27.4314	8.50262	0.000878083	0.00597983	-0.0686875
Ref1	Q9V3E7	Ref1	Ref1	Q9V3E7	FALSE	0	4.1767	3.51765	4.83575	28.4764	17.3273	4.88047e-05	0.00173608	3.07664
rept	M9PFN1	rept	rept	M9PFN1	FALSE	0	2.23486	1.59715	2.87257	28.3429	9.58168	0.000544952	0.00472937	0.479248
RfC3	Q9VKW3	RfC3	RfC3	Q9VKW3	FALSE	0	0.101768	-0.585066	0.788601	28.3648	0.40511	0.705355	0.754267	-7.33328
RfC38	Q9U9Q1	RfC38	RfC38	Q9U9Q1	TRUE	1	0.629853	0.0936449	1.16606	27.4979	3.2116	0.0307394	0.0659826	-4.23715
RfC4	P53034	RfC4	RfC4	P53034	TRUE	2	0.806016	0.029033	1.583	27.4965	2.83627	0.0449154	0.0857343	-4.67261
Rif1	Q9XZ34	Rif1	Rif1	Q9XZ34	FALSE	0	-0.464951	-1.08903	0.159133	29.2085	-2.03695	0.108583	0.170132	-5.65649
Rm62	E1JJ68	Rm62	Rm62	E1JJ68	FALSE	0	0.17279	-0.293336	0.638915	32.5489	1.01351	0.366047	0.439556	-6.86561
Rme-8	A0A0B4LFW6	Rme-8	Rme-8	A0A0B4LFW6	TRUE	1	0.727156	-1.57881	3.03312	26.2314	0.862164	0.435435	0.507287	-7.01021
RnpS1	Q9VHC0	RnpS1	RnpS1	Q9VHC0	FALSE	0	-1.08617	-2.04908	-0.123268	28.6001	-3.08412	0.0348746	0.0727278	-4.38268
rod	Q9V9W7	rod	rod	Q9V9W7	TRUE	1	1.08187	-0.644532	2.80828	26.8246	1.71336	0.158994	0.228921	-6.06133
RpI1	P91875	RpI1	RpI1	P91875	FALSE	0	0.677377	-1.18301	2.53777	29.1709	0.995501	0.37378	0.4461	-6.88359
RpI135	P20028	RpI135	RpI135	P20028	FALSE	0	0.764923	-0.668533	2.19838	28.3225	1.45898	0.215636	0.291058	-6.37115
RpII140	A0A0B4LI86	RpII140	RpII140	A0A0B4LI86	FALSE	0	1.97775	1.25305	2.70245	30.414	7.46155	0.00147039	0.00838038	-0.667828
RpII215	P04052	RpII215	RpII215	P04052	FALSE	0	2.05558	1.42562	2.68554	31.093	8.9215	0.000725088	0.0054016	0.152067
RpL10	M9PIM0	RpL10	RpL10	M9PIM0	FALSE	0	0.0477209	-0.424343	0.519785	31.7278	0.276391	0.795431	0.830878	-7.38597
RpL10Ab	Q9VTP4	RpL10Ab	RpL10Ab	Q9VTP4	FALSE	0	0.122447	-0.394536	0.639429	31.0246	0.647568	0.55125	0.6153	-7.18588
RpL11	A0A0B4LGZ5	RpL11	RpL11	A0A0B4LGZ5	FALSE	0	0.989717	0.380076	1.59936	29.501	4.43867	0.0103623	0.0291939	-2.9666
RpL12	Q9W1B9	RpL12	RpL12	Q9W1B9	FALSE	0	-0.0528531	-0.544328	0.438622	29.8824	-0.294025	0.78282	0.822101	-7.37987
RpL13	M9PFF0	RpL13	RpL13	M9PFF0	FALSE	0	-1.10765	-1.57599	-0.63931	32.1347	-6.46631	0.00256407	0.0112281	-1.31974
RpL13A	Q9VNE9	RpL13A	RpL13A	Q9VNE9	FALSE	0	-2.03684	-2.50324	-1.57044	33.1155	-11.9402	0.000224035	0.00321332	1.47674
RpL14	P55841	RpL14	RpL14	P55841	FALSE	0	-0.99101	-1.47465	-0.507367	31.6441	-5.60232	0.00442271	0.0161982	-1.96219
RpL15	A8Y560	RpL15	RpL15	A8Y560	FALSE	0	-1.66415	-2.12506	-1.20323	32.6529	-9.87155	0.000483482	0.00472937	0.615511
RpL17	X2JIQ5	RpL17	RpL17	X2JIQ5	FALSE	0	-0.636234	-1.30503	0.0325661	31.4087	-2.60097	0.0576469	0.103873	-4.9557
RpL18	M9PHM6	RpL18	RpL18	M9PHM6	FALSE	0	-1.43795	-1.90853	-0.967367	32.6441	-8.35457	0.000941493	0.00614089	-0.149343
RpL18A	P41093	RpL18A	RpL18A	P41093	FALSE	0	-1.37255	-1.84519	-0.899903	32.4374	-7.93977	0.00115164	0.00691496	-0.383101
RpL19	P36241	RpL19	RpL19	P36241	FALSE	0	-1.27013	-1.7906	-0.749656	32.2631	-6.67215	0.00227231	0.0106806	-1.17774
RpL21	Q9V9M7	RpL21	RpL21	Q9V9M7	FALSE	0	-0.506009	-0.975412	-0.036605	32.0612	-2.94732	0.0400513	0.0792908	-4.5416
RpL22	P50887	RpL22	RpL22	P50887	FALSE	0	-0.363163	-0.824917	0.0985915	30.0736	-2.15033	0.0952585	0.153356	-5.51411
RpL23	P48159	RpL23	RpL23	P48159	FALSE	0	-0.331152	-0.796102	0.133799	30.3841	-1.94731	0.120555	0.186399	-5.7691
RpL23A	Q9W0A8	RpL23A	RpL23A	Q9W0A8	FALSE	0	-0.581654	-1.06327	-0.10004	31.7513	-3.30203	0.0281518	0.0622526	-4.13543
RpL24	X2JE06	RpL24	RpL24	X2JE06	FALSE	0	-1.4106	-1.92952	-0.89169	31.0594	-7.43233	0.00149318	0.00838038	-0.685787
RpL24-like	Q9VGN9	RpL24-like	RpL24-like	Q9VGN9	TRUE	2	-0.211781	-0.703165	0.279602	28.6568	-1.17837	0.301586	0.380063	-6.69263
RpL26	Q9VVU2	RpL26	RpL26	Q9VVU2	FALSE	0	0.686854	0.062605	1.3111	29.2948	3.00831	0.0376404	0.076237	-4.47041
RpL27	Q9VBN5	RpL27	RpL27	Q9VBN5	FALSE	0	-0.906868	-1.36788	-0.44585	30.9262	-5.37826	0.00515154	0.0179741	-2.14223
RpL27A	M9MRC9	RpL27A	RpL27A	M9MRC9	FALSE	0	-1.52426	-2.01531	-1.03322	32.5191	-8.48697	0.000884534	0.00597983	-0.0771493
RpL28	Q9VZS5	RpL28	RpL28	Q9VZS5	FALSE	0	-0.767829	-1.23127	-0.304393	30.7328	-4.52991	0.00963818	0.0274173	-2.88128
RpL3	O16797	RpL3	RpL3	O16797	FALSE	0	-0.715989	-1.24102	-0.190956	32.4344	-3.72851	0.0189224	0.0462022	-3.67322
RpL30	Q9VJ19	RpL30	RpL30	Q9VJ19	FALSE	0	-0.654841	-1.12015	-0.189533	30.3734	-3.84778	0.017017	0.0426153	-3.54911
RpL31	Q9V597	RpL31	RpL31	Q9V597	FALSE	0	-0.239633	-0.747506	0.268241	29.1575	-1.29005	0.264032	0.343829	-6.56811
RpL32	P04359	RpL32	RpL32	P04359	FALSE	0	-1.53355	-2.01749	-1.0496	31.3946	-8.66396	0.000814849	0.00579083	0.0176174
RpL34a	Q9VBH8	RpL34a	RpL34a	Q9VBH8	FALSE	0	-1.39955	-1.864	-0.935097	31.1645	-8.23877	0.000995047	0.00633802	-0.213429
RpL34b	Q9VHE5	RpL34b	RpL34b	Q9VHE5	TRUE	2	-0.721294	-1.21749	-0.225097	28.305	-3.97442	0.0152384	0.0396875	-3.41978
RpL35	Q9W499	RpL35	RpL35	Q9W499	FALSE	0	-1.47736	-1.97754	-0.977173	30.8874	-8.07553	0.00107705	0.00662535	-0.305301
RpL35A	Q9VNB9	RpL35A	RpL35A	Q9VNB9	FALSE	0	-0.955146	-1.49084	-0.419452	30.9117	-4.87493	0.00739695	0.0226943	-2.56922
RpL36	X2JC35	RpL36	RpL36	X2JC35	FALSE	0	0.291564	-0.239359	0.822488	29.5621	1.50147	0.204911	0.280555	-6.32031
RpL36A	Q9VLT7	RpL36A	RpL36A	Q9VLT7	FALSE	0	-1.76094	-2.26398	-1.25789	29.8632	-9.57086	0.000547428	0.00472937	0.474075
RpL37a	M9PH59	RpL37a	RpL37a	M9PH59	TRUE	1	-1.21229	-1.9111	-0.513482	28.972	-4.74312	0.00817021	0.0243178	-2.6865
RpL37A	M9MRF2	RpL37A	RpL37A	M9MRF2	FALSE	0	-0.355965	-0.863223	0.151294	28.6929	-1.91864	0.124681	0.190765	-5.80509
RpL4	P09180	RpL4	RpL4	P09180	FALSE	0	-1.34037	-1.83865	-0.842086	33.9154	-7.35467	0.00155587	0.00838038	-0.733844
RpL5	R9Q794	RpL5	RpL5	R9Q794	FALSE	0	-0.6004	-1.06132	-0.139479	32.2095	-3.56147	0.0220337	0.0520635	-3.85081
RpL6	Q9V9W2	RpL6	RpL6	Q9V9W2	FALSE	0	-1.9157	-2.41235	-1.41906	33.044	-10.5462	0.000370447	0.00434164	0.916696
RpL7	X2J5G6	RpL7	RpL7	X2J5G6	FALSE	0	-1.89732	-2.37066	-1.42397	33.8125	-10.9592	0.000317177	0.00395459	1.09088
RpL7-like	Q9VKC1	RpL7-like	RpL7-like	Q9VKC1	FALSE	0	-0.111067	-0.664703	0.442568	29.5669	-0.5485	0.611442	0.670983	-7.25326
RpL7A	X2JCS6	RpL7A	RpL7A	X2JCS6	FALSE	0	-1.2372	-1.75754	-0.716846	31.9812	-6.50068	0.0025123	0.0112281	-1.29575
RpL8	Q9V3G1	RpL8	RpL8	Q9V3G1	FALSE	0	-0.301014	-0.774561	0.172533	31.2602	-1.73796	0.154402	0.227398	-6.03082
RpL9	X2JDU0	RpL9	RpL9	X2JDU0	FALSE	0	-0.313552	-0.783561	0.156457	30.8514	-1.82397	0.13941	0.207874	-5.92365
RpLP0	M9PG76	RpLP0	RpLP0	M9PG76	FALSE	0	-0.119715	-0.688452	0.449023	28.6401	-0.575508	0.594631	0.656222	-7.23582
RpLP1	M9PBK5	RpLP1	RpLP1	M9PBK5	FALSE	0	0.249296	-0.253023	0.751615	28.1781	1.35691	0.243727	0.323864	-6.49125
RpS10b	M9NEQ9	RpS10b	RpS10b	M9NEQ9	FALSE	0	1.3072	0.702996	1.9114	28.168	5.91527	0.00360288	0.0137993	-1.72035
RpS11	Q0E9B6	RpS11	RpS11	Q0E9B6	FALSE	0	-1.22764	-1.73198	-0.723298	31.9787	-6.65519	0.00229476	0.0106806	-1.18929
RpS13	X2J950	RpS13	RpS13	X2J950	FALSE	0	0.365767	-0.101378	0.832911	29.9454	2.14076	0.0963109	0.154112	-5.52611
RpS14a	X2JCX8	RpS14a	RpS14a	X2JCX8	FALSE	0	-0.544433	-1.0123	-0.0765699	30.754	-3.18157	0.0316595	0.0672191	-4.2712
RpS15Aa	E1JJM9	RpS15Aa	RpS15Aa	E1JJM9	FALSE	0	-0.121876	-0.604209	0.360456	29.6807	-0.690856	0.526253	0.591908	-7.15357
RpS16	A0A0B4LG52	RpS16	RpS16	A0A0B4LG52	FALSE	0	0.339743	-0.123401	0.802888	31.036	2.00562	0.112613	0.175509	-5.69585
RpS17	P17704	RpS17	RpS17	P17704	FALSE	0	-0.123018	-0.623564	0.377529	30.3768	-0.671952	0.537069	0.600616	-7.16788
RpS18	P41094	RpS18	RpS18	P41094	FALSE	0	0.26713	-0.220037	0.754297	30.1763	1.4992	0.20547	0.280665	-6.32304
RpS19a	E2QD65	RpS19a	RpS19a	E2QD65	FALSE	0	0.796238	0.211566	1.38091	29.05	3.72345	0.0190086	0.04622	-3.67853
RpS2	M9PB84	RpS2	RpS2	M9PB84	FALSE	0	-0.0394951	-0.511081	0.432091	30.8647	-0.22898	0.829696	0.860535	-7.40055
RpS20	P55828	RpS20	RpS20	P55828	FALSE	0	0.414248	-0.0507823	0.879278	29.0347	2.43554	0.0690716	0.118351	-5.15867
RpS23	A0A0B4LFD9	RpS23	RpS23	A0A0B4LFD9	FALSE	0	-0.50319	-0.979504	-0.0268762	30.6544	-2.88838	0.0425526	0.082569	-4.61091
RpS24	Q9W229	RpS24	RpS24	Q9W229	FALSE	0	-0.888123	-1.39276	-0.383488	31.1953	-4.81184	0.00775549	0.0235478	-2.62506
RpS25	P48588	RpS25	RpS25	P48588	FALSE	0	0.166848	-0.336466	0.670162	28.9393	0.906352	0.414133	0.486337	-6.96958
RpS26	M9PG47	RpS26	RpS26	M9PG47	FALSE	0	-0.554078	-1.01985	-0.0883019	30.2329	-3.25244	0.0295377	0.0638713	-4.19105
RpS27	Q9VBU9	RpS27	RpS27	Q9VBU9	FALSE	0	-0.50323	-1.05737	0.0509063	29.4035	-2.48293	0.0655557	0.113656	-5.10023
RpS27A	P15357	RpS27A	RpS27A	P15357	FALSE	0	-0.522416	-0.9953	-0.0495319	30.0635	-3.02049	0.0371792	0.075913	-4.45625
RpS29	A0A0C4DHE8	RpS29	RpS29	A0A0C4DHE8	FALSE	0	0.225337	-0.238111	0.688785	28.4506	1.32937	0.2519	0.330972	-6.5231
RpS3	G3M3A2	RpS3	RpS3	G3M3A2	FALSE	0	0.903802	0.405415	1.40219	31.8416	4.95818	0.00695393	0.0219086	-2.49635
RpS3A	P55830	RpS3A	RpS3A	P55830	FALSE	0	0.412984	-0.0518896	0.877857	32.4637	2.42892	0.0695788	0.118872	-5.16684
RpS4	X2JGM9	RpS4	RpS4	X2JGM9	FALSE	0	-0.548512	-1.02337	-0.0736566	31.8868	-3.1582	0.0323976	0.068538	-4.2978
RpS5a	X2JKU5	RpS5a	RpS5a	X2JKU5	FALSE	0	0.337333	-0.196539	0.871204	29.5217	1.72758	0.156323	0.227891	-6.04371
RpS6	P29327	RpS6	RpS6	P29327	FALSE	0	-1.51523	-1.98129	-1.04918	32.1912	-8.88907	0.000735697	0.0054016	0.135356
RpS7	Q8IMI7	RpS7	RpS7	Q8IMI7	FALSE	0	-0.048531	-0.543225	0.446163	31.3011	-0.268224	0.801296	0.835516	-7.38867
RpS8	A0A0B4K6N1	RpS8	RpS8	A0A0B4K6N1	FALSE	0	-0.423909	-0.886172	0.0383538	31.8323	-2.50726	0.0638302	0.111323	-5.07032
RpS9	P55935	RpS9	RpS9	P55935	FALSE	0	-1.30942	-1.83081	-0.788021	32.2306	-6.86635	0.00203343	0.0100133	-1.04734
Rrp1	P27864	Rrp1	Rrp1	P27864	FALSE	0	-0.283124	-0.92385	0.357602	29.8028	-1.20815	0.291112	0.370046	-6.65995
Rs1	Q7JQN4	Rs1	Rs1	Q7JQN4	FALSE	0	-1.00409	-1.71091	-0.297275	30.7788	-3.88402	0.0164839	0.0416362	-3.51185
Rtc1	P56175	Rtc1	Rtc1	P56175	FALSE	0	-0.297051	-1.48495	0.89085	27.7411	-0.6837	0.530329	0.59535	-7.15902
rump	Q9VHC7	rump	rump	Q9VHC7	FALSE	0	3.1538	2.67355	3.63405	31.7286	17.9549	4.21544e-05	0.00173608	3.22044
SA	Q9VM62	SA	SA	Q9VM62	TRUE	2	3.74718	3.21652	4.27785	27.568	19.3064	3.12563e-05	0.00173608	3.50742
Sac1	M9MRM4	Sac1	Sac1	M9MRM4	TRUE	1	0.294532	-1.51717	2.10623	26.7035	0.44449	0.678823	0.728554	-7.31347
Saf-B	Q8IMV6	Saf-B	Saf-B	Q8IMV6	FALSE	0	3.51245	2.94986	4.07504	29.2829	17.0699	5.19042e-05	0.00173608	3.01559
Sas10	Q9I7W5	Sas10	Sas10	Q9I7W5	TRUE	2	3.87121	3.35457	4.38785	27.704	20.4867	2.44678e-05	0.00173608	3.73527
sbr	Q9U1H9	sbr	sbr	Q9U1H9	FALSE	0	-0.277723	-1.31084	0.755394	28.5435	-0.734984	0.501612	0.571877	-7.11893
Sc2	Q9VZL3	Sc2	Sc2	Q9VZL3	TRUE	1	-0.219344	-0.706541	0.267852	26.603	-1.23094	0.283323	0.364095	-6.63466
scny	Q9VRP5	scny	scny	Q9VRP5	FALSE	0	0.71024	-0.513809	1.93429	28.2008	1.58643	0.185055	0.25943	-6.21744
scra	Q9V4P1	scra	scra	Q9V4P1	FALSE	0	0.126129	-1.77644	2.0287	28.7488	0.181254	0.864653	0.890486	-7.41252
Scsalpha1	Q94522	Scsalpha1	Scsalpha1	Q94522	TRUE	2	-3.21057	-3.93708	-2.48405	26.2487	-12.0824	0.000213507	0.00321332	1.52966
Sec13	Q9V3J4	Sec13	Sec13	Q9V3J4	FALSE	0	-0.603966	-1.18924	-0.0186913	28.2414	-2.82142	0.045616	0.0861828	-4.69025
Sec61alpha	Q8STG9	Sec61alpha	Sec61alpha	Q8STG9	TRUE	1	-0.934885	-1.58993	-0.279838	25.4083	-3.90212	0.0162251	0.0413387	-3.49331
Sec63	Q9VS57	Sec63	Sec63	Q9VS57	TRUE	1	-1.00621	-1.55951	-0.452905	26.1171	-4.9721	0.00688303	0.0218025	-2.48425
SERCA	P22700	SERCA	SERCA	P22700	TRUE	1	-1.56508	-2.45819	-0.671969	27.1737	-4.79122	0.00787718	0.0237276	-2.64342
sesB	X2JB48	sesB	sesB	X2JB48	FALSE	0	-1.34182	-1.83453	-0.849115	31.8909	-7.44599	0.00148247	0.00838038	-0.677386
SF2	Q9V3W7	SF2	SF2	Q9V3W7	FALSE	0	2.11623	1.63123	2.60123	31.1784	11.9298	0.000224823	0.00321332	1.47287
Sf3b1	Q9VPR5	Sf3b1	Sf3b1	Q9VPR5	FALSE	0	2.19351	1.5581	2.82891	29.1081	9.43855	0.000578848	0.00477753	0.410349
Sf3b3	Q9W0M7	Sf3b3	Sf3b3	Q9W0M7	FALSE	0	-0.0876875	-0.683401	0.508026	29.6282	-0.402454	0.707164	0.754823	-7.33456
shot.1	A1Z9J3	shot	shot	A1Z9J3	FALSE	0	0.529182	-2.33944	3.3978	29.1664	0.504367	0.639534	0.692664	-7.28017
shv	Q9VPQ2	shv	shv	Q9VPQ2	TRUE	1	0.477164	-0.140262	1.09459	31.2276	2.11299	0.0994371	0.157487	-5.56097
Sin3A	A0A0B4LF82	Sin3A	Sin3A	A0A0B4LF82	TRUE	1	3.02076	2.54529	3.49623	28.03	17.3704	4.83081e-05	0.00173608	3.08675
sle	Q8INM3	sle	sle	Q8INM3	FALSE	0	0.070857	-0.810194	0.951908	31.6281	0.219886	0.836324	0.864349	-7.40304
SmB	Q05856	SmB	SmB	Q05856	FALSE	0	1.8873	1.30419	2.47042	29.8988	8.84916	0.000749017	0.00541882	0.114703
SMC1	Q9VCD8	SMC1	SMC1	Q9VCD8	TRUE	1	2.88715	2.22853	3.54577	27.3025	11.9853	0.000220625	0.00321332	1.49361
SMC2	Q7KK96	SMC2	SMC2	Q7KK96	FALSE	0	1.66696	0.275138	3.05879	27.2856	3.27459	0.0289091	0.0629766	-4.16616
SmD1	Q9VU02	SmD1	SmD1	Q9VU02	FALSE	0	-0.825677	-1.43792	-0.213433	28.9316	-3.68724	0.01964	0.0473622	-3.71669
SmD2	Q9VI10	SmD2	SmD2	Q9VI10	FALSE	0	-0.282641	-0.746577	0.181295	26.2823	-1.66568	0.168306	0.240555	-6.12025
SmD3	O44437	SmD3	SmD3	O44437	FALSE	0	-0.447857	-0.92269	0.0269762	27.6255	-2.57878	0.0590475	0.105532	-4.98276
smt3	O97102	smt3	smt3	O97102	FALSE	0	-0.136944	-0.669074	0.395185	31.066	-0.703626	0.519034	0.584911	-7.14372
snama	Q9XZ21	snama	snama	Q9XZ21	FALSE	0	0.753181	0.0624681	1.44389	28.9707	2.98138	0.0386835	0.0774416	-4.50177
snRNP-U1-70K	M9PC89	snRNP-U1-70K	snRNP-U1-70K	M9PC89	FALSE	0	2.94264	2.42091	3.46437	28.2846	15.4208	7.87924e-05	0.00192385	2.5928
Sply	Q9V7Y2	Sply	Sply	Q9V7Y2	FALSE	0	0.207656	-0.30816	0.723472	26.7813	1.10069	0.330567	0.403567	-6.77592
Spt5	Q9V460	Spt5	Spt5	Q9V460	FALSE	0	1.00367	0.509456	1.49788	30.5899	5.55255	0.00457319	0.0166453	-2.00168
Spt6	N0D8I3	Spt6	Spt6	N0D8I3	FALSE	0	2.24196	1.45311	3.0308	30.0783	7.77054	0.00125373	0.00727411	-0.481928
sqh	F6J1D0	sqh	sqh	F6J1D0	TRUE	2	1.86939	1.22221	2.51656	27.7388	7.8976	0.0011761	0.00696157	-0.407539
Srp54	Q9VL71	Srp54	Srp54	Q9VL71	FALSE	0	-1.03031	-1.58012	-0.480502	29.9715	-5.12357	0.0061652	0.0205273	-2.35426
SRPK	Q0E965	SRPK	SRPK	Q0E965	FALSE	0	0.839883	0.341784	1.33798	28.2245	4.61019	0.00905088	0.0261272	-2.80719
Srrm1	Q9VU43	Srrm1	Srrm1	Q9VU43	FALSE	0	-0.717987	-1.30035	-0.13562	28.1443	-3.37081	0.0263537	0.0596265	-4.05893
Srrm234.1	Q7YZ99	Srrm234	Srrm234	Q7YZ99	FALSE	0	-0.897737	-1.50733	-0.288147	29.8625	-4.02649	0.0145718	0.0382918	-3.36733
Ssrp	Q05344	Ssrp	Ssrp	Q05344	FALSE	0	0.410223	-0.402619	1.22307	29.1556	1.37984	0.237118	0.316517	-6.46454
sta	P38979	sta	sta	P38979	FALSE	0	1.57206	0.872881	2.27123	28.5898	6.14749	0.00311208	0.0126644	-1.54775
sti	M9PI41	sti	sti	M9PI41	FALSE	0	-1.22178	-3.37686	0.933303	29.4036	-1.55005	0.193308	0.267412	-6.26168
Strica	Q7KHK9	Strica	Strica	Q7KHK9	TRUE	2	0.270664	-0.204584	0.745911	26.9082	1.55713	0.191671	0.266792	-6.25308
Stt3B	Q9XZ53	Stt3B	Stt3B	Q9XZ53	TRUE	1	-0.944163	-1.64763	-0.240694	26.4837	-3.66959	0.0199566	0.0477329	-3.73536
su(Hw)	A0A0B4K6W1	su(Hw)	su(Hw)	A0A0B4K6W1	FALSE	0	1.15111	0.484409	1.81781	26.9776	4.72064	0.00831158	0.0245989	-2.70673
Su(var)2-HP2	A1Z9S6	Su(var)2-HP2	Su(var)2-HP2	A1Z9S6	TRUE	2	3.03284	2.51821	3.54747	27.4115	16.1127	6.58009e-05	0.00178085	2.77715
Su(var)205	P05205	Su(var)205	Su(var)205	P05205	FALSE	0	2.2026	1.66102	2.74418	28.4379	11.1196	0.000299052	0.00389432	1.15661
Su(var)3-7	P20193	Su(var)3-7	Su(var)3-7	P20193	TRUE	1	0.274468	-0.477026	1.02596	26.8423	0.998578	0.372449	0.445418	-6.88054
Surf4	O18405	Surf4	Surf4	O18405	TRUE	2	-2.03691	-2.61701	-1.45681	25.5951	-9.60022	0.000540742	0.00472937	0.488092
Surf6	Q9VDS6	Surf6	Surf6	Q9VDS6	FALSE	0	1.06041	0.556171	1.56465	28.6931	5.74979	0.0040109	0.0150195	-1.84688
Sym	Q8MSU4	Sym	Sym	Q8MSU4	FALSE	0	1.32395	-0.0258122	2.67371	28.4363	2.68182	0.0528559	0.0974012	-4.85763
Tailor	Q9VI58	Tailor	Tailor	Q9VI58	FALSE	0	0.93292	-0.0677275	1.93357	27.3073	2.54905	0.0609841	0.107966	-5.01908
Tango4	Q9VYQ9	Tango4	Tango4	Q9VYQ9	FALSE	0	0.982078	0.0560857	1.90807	28.1621	2.89971	0.0420582	0.0824285	-4.59755
tefu	Q5EAK6	tefu	tefu	Q5EAK6	FALSE	0	1.54113	0.262405	2.81985	30.2241	3.29517	0.0283389	0.0624309	-4.14311
tho2.1	Q9VQ76	tho2	tho2	Q9VQ76	FALSE	0	0.42492	-0.358441	1.20828	29.9194	1.48307	0.209489	0.284168	-6.34239
thoc5	Q9W1F4	thoc5	thoc5	Q9W1F4	FALSE	0	-0.043174	-0.59509	0.508742	28.5964	-0.213877	0.840712	0.867355	-7.40463
Top1	M9NDX3	Top1	Top1	M9NDX3	FALSE	0	1.42947	0.897807	1.96113	30.4152	7.35112	0.00155881	0.00838038	-0.736051
Top2	P15348	Top2	Top2	P15348	FALSE	0	-0.339411	-0.963471	0.284649	33.1641	-1.48701	0.208499	0.283993	-6.33766
Tor	Q9VK45	Tor	Tor	Q9VK45	TRUE	2	-0.873355	-1.55899	-0.187715	25.9629	-3.48265	0.02371	0.0549172	-3.93615
tral	Q9VTZ0	tral	tral	Q9VTZ0	TRUE	2	1.90167	1.42809	2.37524	28.5511	10.979	0.000314869	0.00395459	1.09905
Trf4-1	Q7KVS9	Trf4-1	Trf4-1	Q7KVS9	TRUE	1	-0.354447	-1.22309	0.514191	25.5218	-1.11565	0.324796	0.399016	-6.76011
Trl	Q2PDY2	Trl	Trl	Q2PDY2	FALSE	0	2.70173	2.2086	3.19487	27.5439	14.9793	8.87625e-05	0.00201914	2.46944
tum	A1Z9I5	tum	tum	A1Z9I5	FALSE	0	-0.864242	-1.89468	0.166199	30.4473	-2.29312	0.0809779	0.134048	-5.33547
U3-55K	Q8MSW9	U3-55K	U3-55K	Q8MSW9	FALSE	0	0.173601	-0.759048	1.10625	29.0757	0.508919	0.636601	0.691879	-7.27749
Ulp1	Q9VWK5	Ulp1	Ulp1	Q9VWK5	FALSE	0	0.365138	-0.155875	0.886152	29.2259	1.91613	0.125049	0.19083	-5.80824
Upf1	X2JBC1	Upf1	Upf1	X2JBC1	FALSE	0	2.49509	1.42026	3.56992	28.2981	6.34689	0.00275436	0.0116961	-1.40397
UQCR-C2	Q9VV75	UQCR-C2	UQCR-C2	Q9VV75	TRUE	2	0.837497	0.122093	1.5529	25.9441	3.20072	0.031069	0.0662275	-4.24947
Vap33	Q9W4N8	Vap33	Vap33	Q9W4N8	FALSE	0	-0.631244	-1.25283	-0.0096609	29.2808	-2.7766	0.0478087	0.0897945	-4.74371
Vha100-1	Q8IML3	Vha100-1	Vha100-1	Q8IML3	FALSE	0	-0.472069	-1.63272	0.688586	26.5591	-1.11203	0.326183	0.399881	-6.76394
Vha100-2	Q9VE75	Vha100-2	Vha100-2	Q9VE75	TRUE	2	-1.53872	-2.12854	-0.948904	25.8368	-7.13274	0.00175366	0.00880396	-0.87385
vir	Q9W1R5	vir	vir	Q9W1R5	FALSE	0	2.60365	2.11954	3.08777	28.1324	14.7044	9.57611e-05	0.00207837	2.39029
vkg	Q9VMV5	vkg	vkg	Q9VMV5	FALSE	0	1.92294	0.210824	3.63505	31.2316	3.07077	0.0353437	0.0734448	-4.39806
vtd	O96689	vtd	vtd	O96689	TRUE	2	1.21123	0.69399	1.72847	26.8785	6.40249	0.00266369	0.0113936	-1.36458
wcd	Q9V7P1	wcd	wcd	Q9V7P1	FALSE	0	-0.115231	-1.54186	1.3114	27.9311	-0.220837	0.83563	0.864349	-7.40278
x16	M9PC85	x16	x16	M9PC85	FALSE	0	0.729342	0.21927	1.23941	28.6372	3.90945	0.0161217	0.0412547	-3.48582
XNP	A0A0B4LHR3	XNP	XNP	A0A0B4LHR3	TRUE	1	1.7842	0.873749	2.69465	27.5552	5.358	0.0052244	0.0181154	-2.15881
ytr	Q9W1I6	ytr	ytr	Q9W1I6	TRUE	2	-0.904754	-1.40833	-0.401181	25.8498	-4.91229	0.00719405	0.022424	-2.5364
Zcchc7	Q9VVA9	Zcchc7	Zcchc7	Q9VVA9	TRUE	2	1.26458	0.0830277	2.44613	26.364	2.92623	0.0409261	0.0807499	-4.56634
zf30C	Q9VL91	zf30C	zf30C	Q9VL91	TRUE	1	2.47543	1.97501	2.97585	27.1914	13.5248	0.000134827	0.00246902	2.02823
zip	Q99323	zip	zip	Q99323	FALSE	0	-1.11358	-2.44705	0.219886	28.6469	-2.28326	0.0818842	0.135167	-5.34778
zip.1	Q59E58	zip	zip	Q59E58	FALSE	0	-0.84487	-2.03687	0.34713	34.3437	-1.93789	0.121894	0.18748	-5.78093
Zw10	Q9W4X9	Zw10	Zw10	Q9W4X9	FALSE	0	-0.382429	-1.51648	0.751619	26.9589	-0.922008	0.406793	0.47964	-6.95486
