# Supplementary material for: The role of RNA in the maintenance of chromatin domains as revealed by antibody-mediated proximity labelling coupled to mass spectrometry
Source: eLife. 2024 May 8;13:e95718. doi: 10.7554/eLife.95718 (PMC11147508; doi:10.7554/eLife.95718)
Supplement: Supplementary file 6. [file elife-95718-supp6.xlsx]

## Sheet: Ref8770_RChoudhury_Results_2023
Histone.Modification	CID_Input_Rep1	CID_Input_Rep2	CID_Input_Rep3	Msl2_Input_Rep1	Msl2_Input_Rep2	Msl2_Input_Rep3	Ab_Ctl_Input_Rep1	Ab_Ctl_Input_Rep2	Ab_Ctl_Input_Rep3	CID_Exp_Rep1	CID_Exp_Rep2	CID_Exp_Rep3	Msl2_Exp_Rep1	Msl2_Exp_Rep2	Msl2_Exp_Rep3	Ab_Ctl_Exp_Rep1	Ab_Ctl_Exp_Rep2	Ab_Ctl_Exp_Rep3
H3_18_26_K18K23_acac	5.99948	4.20588	4.47822	7.1578	6.03679	7.05971	7.25304	6.31131	6.69035	5.23944	5.78957	4.6021	8.13691	7.41928	6.22856	9.64242	8.51208	9.776
H3_18_26_K18K23_acun	2.74555	2.1954	2.49852	3.42485	3.81664	3.10689	2.97088	3.12057	2.70309	2.05174	2.19666	2.40394	2.7653	3.30256	3.09385	2.47042	3.13086	2.9845
H3_18_26_K18K23_unac	54.164	53.3791	52.8888	48.4993	48.5257	49.6105	52.5682	54.3615	53.4301	54.0773	55.347	49.4145	49.3902	58.2715	54.174	54.0946	62.0481	52.6128
H3_18_26_K18K23_unun	37.091	40.2196	40.1345	40.9181	41.6209	40.2229	37.2079	36.2066	37.1764	38.6315	36.6668	43.5795	39.7076	31.0066	36.5036	33.7926	26.309	34.6267
H3_27_40_K27K36K37_me1me1un	0.662426	0.809944	0.799403	1.05229	1.23829	1.01192	0.937614	0.977237	0.810331	0.949259	1.01019	0.736195	0.477836	0.651504	0.758188	0.261733	0.16662	0.0282622
H3_27_40_K27K36K37_me1me2un	1.0634	1.09822	1.17998	1.2819	1.14971	1.2064	1.17585	1.1734	1.12958	0.854445	0.985167	1.21089	0.704813	1.09095	1.20606	1.39827	0.727585	0.296639
H3_27_40_K27K36K37_me1unun	0.94996	1.57364	1.21298	1.40648	1.51804	1.58504	1.23512	1.34209	1.28745	0.834478	0.937939	1.38508	0.673327	1.21325	1.57599	1.46255	0.63888	1.08151
H3_27_40_K27K36K37_me2me1un	10.0394	11.0285	10.7033	11.2363	12.0022	11.2902	11.1098	10.8341	4.43022	3.16622	3.28377	4.57955	2.31961	3.61233	3.77786	3.30296	8.96243	1.49824
H3_27_40_K27K36K37_me2unun	36.145	32.5504	32.3003	34.6604	34.4869	34.5889	37.6216	35.1325	39.9909	41.9723	44.8666	41.9791	39.803	48.2678	52.9029	75.5969	41.3506	51.17
H3_27_40_K27K36K37_me3unun	39.5998	38.4634	41.0514	33.9692	32.7685	32.1179	32.2438	35.4607	36.6903	44.8781	41.0714	39.0214	48.5708	33.6924	30.9693	7.57891	37.2518	41.4176
H3_27_40_K27K36K37_unme1un	4.14425	5.56197	4.8964	6.90947	7.33322	7.66835	6.16047	5.5409	5.13272	2.63668	3.0481	3.41994	2.12727	3.5949	3.82293	3.4426	3.93967	1.28835
H3_27_40_K27K36K37_unme2un	2.19606	2.14804	2.19338	2.33209	2.40139	2.47229	2.46865	2.38444	2.53423	1.71163	1.63727	2.25966	2.95001	2.73057	0.0785301	2.21026	2.20884	1.40607
H3_27_40_K27K36K37_ununun	5.19968	6.76592	5.6628	7.15194	7.10168	8.05897	7.04706	7.15459	7.99428	2.99689	3.1596	5.40816	2.37338	5.14629	4.9082	4.74579	4.75352	1.81327
H3_3_8_K4_me1	16.9327	20.4382	19.129	21.6199	16.6141	18.885	20.028	18.8426	18.7823	17.0493	22.9734	20.4285	12.3084	17.5058	19.1513	17.0105	14.4225	10.4036
H3_3_8_K4_me2	0.97925	0.751377	0.820412	0.783687	0.693513	0.765809	0.850587	0.790677	0.917999	1.94138	2.56755	1.86147	1.69708	2.25226	1.9732	1.13769	0.378767	0.978405
H3_3_8_K4_me3	0.726178	0.528116	0.604848	0.460312	0.480211	0.50196	0.481743	0.609378	0.567038	1.89056	2.26768	1.4884	1.33168	1.82826	1.35462	1.71795	6.35738	1.89279
H3_3_8_K4_un	81.3618	78.2823	79.4457	77.1361	82.2122	79.8472	78.6397	79.7574	79.7327	79.1188	72.1914	76.2217	84.6629	78.4137	77.5209	80.1339	78.8414	86.7252
H3_73_83_K79_me1	21.1812	21.9383	22.1408	21.9428	23.1604	21.0921	21.4025	22.194	21.7339	27.4378	28.2106	25.1636	26.7991	28.7966	25.3134	25.7062	21.7742	21.5116
H3_73_83_K79_un	78.8188	78.0617	77.8592	78.0572	76.8396	78.9079	78.5975	77.806	78.2661	72.5622	71.7894	74.8364	73.2009	71.2034	74.6866	74.2938	78.2258	78.4884
H3_9_17_K9K14_acac	0.518973	0.373931	0.439196	0.612701	0.551702	0.609392	0.645966	0.72037	0.818606	0.640944	0.548277	0.367064	0.690531	0.858229	0.563841	0.678689	0.873674	0.126121
H3_9_17_K9K14_acun	0.420571	0.397189	0.457045	0.361669	0.491257	0.45857	0.425116	0.339523	0.326104	0.372386	0.357493	0.333078	0.448098	0.747477	0.449891	0.416959	0.574161	0.400072
H3_9_17_K9K14_me1ac	3.18354	2.86965	2.89243	4.25869	4.19858	4.18112	4.80614	4.69137	4.52182	3.48246	3.51966	2.57047	4.17089	4.02703	4.00686	5.33656	5.6293	4.99234
H3_9_17_K9K14_me1un	8.18855	10.5129	9.22618	9.34856	9.89	9.28862	9.11778	10.1789	9.4331	11.3013	11.6589	12.2452	10.4911	8.8521	11.7582	10.3781	1.5532	7.49034
H3_9_17_K9K14_me2un	23.2737	21.932	23.7047	22.5017	20.0624	23.2662	23.1021	24.1912	29.4251	23.1153	22.1621	18.9929	19.4009	19.5411	21.3005	20.2802	24.0447	25.1992
H3_9_17_K9K14_me3un	8.55218	7.10821	8.76807	8.38054	6.18613	8.3205	8.3799	8.50466	8.42302	9.3435	9.00074	10.7413	8.07356	8.55672	11.6595	8.90191	9.21095	10.1804
H3_9_17_K9K14_unac	16.7467	15.6	13.0872	18.7759	23.6168	20.5131	20.6616	15.7153	14.7608	11.8293	11.2017	10.8099	14.4692	15.3613	14.6341	18.0378	21.6015	19.6121
H3_9_17_K9K14_unun	39.1158	41.2062	41.4253	35.7603	35.003	33.3625	32.8614	35.6586	32.2915	39.9148	41.5511	43.9401	42.2557	42.056	35.6271	35.9697	36.5125	31.9995
H4_18_23_K20_me1	6.42175	7.43486	6.31488	9.74859	10.8953	10.9765	6.68754	5.4528	6.349	4.08906	4.9596	5.36991	5.9961	7.3573	6.96855	4.76949	8.34887	3.53156
H4_18_23_K20_me2	87.7412	87.4786	89.3527	83.2913	82.076	82.0199	88.2622	90.5231	89.4466	93.522	91.9732	91.9609	90.6111	88.8109	89.3442	91.5563	86.2073	92.8775
H4_18_23_K20_me3	0.172921	0.215497	0.159963	0.15675	0.130294	0.217196	0.170276	0.149781	0.349359	0.16613	0.121915	0.248199	0.19705	0.157645	0.253983	0.690453	0.521447	0.523838
H4_18_23_K20_un	5.66414	4.871	4.17247	6.80332	6.89839	6.78641	4.87999	3.87435	3.85504	2.22286	2.94529	2.42097	3.19576	3.6742	3.43323	2.98377	4.92235	3.06712
H4_4_17_K5K8K12K16_1ac	14.602	12.5397	12.5411	14.6548	15.142	14.897	15.9511	16.3283	15.6113	14.7017	15.6341	13.9053	20.2621	22.2592	19.88	21.01	21.057	19.4631
H4_4_17_K5K8K12K16_2ac	3.09482	2.75889	2.59903	3.76471	3.32258	3.61443	4.28874	4.06723	4.19089	3.99111	4.01	4.16051	4.75151	7.60743	6.36822	4.32666	5.86438	4.53393
H4_4_17_K5K8K12K16_3ac	0.787309	0.622417	0.629791	1.01357	0.889588	0.968645	1.12012	1.05276	1.12743	1.2904	1.28866	1.10479	1.56121	2.0724	1.70895	3.12285	3.07732	2.44679
H4_4_17_K5K8K12K16_4ac	0.235972	0.228626	0.204535	0.350337	0.32134	0.367873	0.451299	0.613782	0.438768	0.5453	0.55539	0.419882	0.638419	0.867601	0.617989	1.10275	1.00025	0.677243
H4_4_17_K5K8K12K16_un	81.2799	83.8503	84.0256	80.2166	80.3245	80.1521	78.1887	77.9379	78.6316	79.4715	78.5118	80.4095	72.7868	67.1934	71.4249	70.4378	69.0011	72.879
