# Supplementary material for: The role of RNA in the maintenance of chromatin domains as revealed by antibody-mediated proximity labelling coupled to mass spectrometry
Source: eLife. 2024 May 8;13:e95718. doi: 10.7554/eLife.95718 (PMC11147508; doi:10.7554/eLife.95718)
Supplement: Supplementary file 7. [file elife-95718-supp7.xlsx]

## Sheet: H4K16Ac_vs_H3K9me3
name	Uniprot	symbol	imputed	num_NAs	H4K16Ac_vs_H3K9me3.logFC	H4K16Ac_vs_H3K9me3.CI.L	H4K16Ac_vs_H3K9me3.CI.R	H4K16Ac_vs_H3K9me3.AveExpr	H4K16Ac_vs_H3K9me3.t	H4K16Ac_vs_H3K9me3.P.Value	H4K16Ac_vs_H3K9me3.adj.P.Val	H4K16Ac_vs_H3K9me3.B	H4K16Ac_vs_H3K9me3.q.val	H4K16Ac_vs_H3K9me3.SEM
A0A023GQA5	A0A023GQA5	l(2)37Cc	FALSE	0	-1.23828	-1.49625	-0.980306	26.2656	-11.6496	1.88682e-05	0.00539248	3.67252	0.00196707	0.106294
A0A0B4JCV4	A0A0B4JCV4	tacc	FALSE	0	-0.396121	-0.639785	-0.152456	26.9334	-3.94551	0.0070721	0.0562836	-2.47039	0.0205311	0.100398
A0A0B4JCW4	A0A0B4JCW4	ScsbetaA	FALSE	0	-0.0832451	-0.282194	0.115704	29.2527	-1.01552	0.34778	0.509335	-6.35774	0.185795	0.0819733
A0A0B4JCZ3	A0A0B4JCZ3	pre-mod(mdg4)-W	FALSE	0	-0.294227	-0.580898	-0.00755662	26.7906	-2.49097	0.0457712	0.151846	-4.44366	0.0553902	0.118118
A0A0B4JD11	A0A0B4JD11	eEF1gamma	FALSE	0	-0.219953	-0.428528	-0.0113784	32.0361	-2.55939	0.0416611	0.144401	-4.34665	0.0526746	0.0859396
A0A0B4JD24	A0A0B4JD24	CG17002	FALSE	0	-0.96722	-1.4747	-0.459742	26.589	-4.62569	0.00328916	0.0400965	-1.64759	0.0146264	0.209097
A0A0B4JD39	A0A0B4JD39	ttk	FALSE	0	0.0622299	-0.186447	0.310907	28.6388	0.607341	0.565158	0.698939	-6.69981	0.254958	0.102463
A0A0B4JD46	A0A0B4JD46	CNBP	FALSE	0	-0.730206	-1.19141	-0.269005	29.1595	-3.84259	0.00798895	0.0601521	-2.60112	0.0219422	0.19003
A0A0B4JDA0	A0A0B4JDA0	mor	FALSE	0	0.0215138	-0.15366	0.196688	29.7808	0.298069	0.775373	0.853113	-6.85501	0.311198	0.0721773
A0A0B4JDC3	A0A0B4JDC3	CG6621	FALSE	0	0.445378	0.195727	0.695029	27.3499	4.32976	0.00455066	0.0473555	-1.99675	0.0172743	0.102864
A0A0B4K618	A0A0B4K618	Fmr1	FALSE	0	-0.0846406	-0.257492	0.0882109	31.4471	-1.18843	0.278117	0.4404	-6.17501	0.160649	0.0712204
A0A0B4K652	A0A0B4K652	RpII15	FALSE	0	-0.256488	-0.560926	0.0479507	28.2075	-2.04473	0.0852817	0.220156	-5.07377	0.0803083	0.125438
A0A0B4K6J3	A0A0B4K6J3	mld	FALSE	0	0.0259146	-0.441256	0.493085	24.9633	0.134628	0.897164	0.931332	-6.89531	0.339731	0.192489
A0A0B4K6L4	A0A0B4K6L4	Prat	FALSE	0	-0.252782	-0.407157	-0.098406	26.6401	-3.97407	0.00683886	0.0552868	-2.4344	0.0201675	0.0636077
A0A0B4K6N1	A0A0B4K6N1	RpS8	FALSE	0	0.030631	-0.173993	0.235255	30.6369	0.363307	0.728424	0.822086	-6.83065	0.29988	0.0843116
A0A0B4K6U6	A0A0B4K6U6	sqd	FALSE	0	-0.0336441	-0.31982	0.252532	32.5793	-0.285328	0.784671	0.857792	-6.85922	0.312905	0.117914
A0A0B4K6W1	A0A0B4K6W1	su(Hw)	FALSE	0	0.0854188	-0.121659	0.292497	28.093	1.00112	0.354167	0.516129	-6.37205	0.188273	0.0853229
A0A0B4K6Y4	A0A0B4K6Y4	unk	TRUE	1	-0.316747	-0.724192	0.0906985	25.4376	-1.88674	0.106491	0.250489	-5.29245	0.0913733	0.167881
A0A0B4K726	A0A0B4K726	Tfb1	FALSE	0	-0.369564	-0.799313	0.0601847	25.4957	-2.0871	0.0803536	0.215023	-5.01453	0.0784359	0.177071
A0A0B4K7G4	A0A0B4K7G4	mod	FALSE	0	-0.0742655	-0.269499	0.120968	31.9234	-0.923211	0.390358	0.549075	-6.44693	0.200291	0.0804426
A0A0B4K7J2	A0A0B4K7J2	Nup358	FALSE	0	0.0353097	-0.220812	0.291432	33.2993	0.334592	0.748945	0.834819	-6.84194	0.304525	0.105531
A0A0B4K7L0	A0A0B4K7L0	rad50	FALSE	0	0.0614511	-0.12087	0.243772	28.6365	0.818016	0.443596	0.599264	-6.54062	0.218599	0.0751221
A0A0B4K7T7	A0A0B4K7T7	RhoGEF2	FALSE	0	-0.503566	-0.806486	-0.200646	26.3239	-4.03457	0.00637244	0.0542124	-2.35857	0.0197756	0.124813
A0A0B4K812	A0A0B4K812	Lis-1	TRUE	3	-0.451675	-0.950114	0.0467653	25.0205	-2.19929	0.068658	0.194403	-4.85681	0.0709143	0.205373
A0A0B4K849	A0A0B4K849	hts	FALSE	0	0.0687436	-0.108889	0.246376	30.2809	0.939245	0.382686	0.542052	-6.43189	0.197729	0.0731903
A0A0B4K859	A0A0B4K859	Nup188	FALSE	0	0.317257	-0.159667	0.794182	29.3894	1.61447	0.15588	0.311841	-5.65714	0.113753	0.196508
A0A0B4K891	A0A0B4K891	CG8963	TRUE	4	-0.491644	-0.963221	-0.0200669	24.9262	-2.53027	0.0433609	0.147306	-4.38793	0.0537342	0.194305
A0A0B4KEE4	A0A0B4KEE4	koi	FALSE	0	-0.165181	-0.380486	0.0501233	31.3953	-1.86199	0.110259	0.253531	-5.32632	0.0924827	0.0887124
A0A0B4KEH0	A0A0B4KEH0	14-3-3zeta	FALSE	0	-0.277192	-0.511095	-0.0432895	26.9878	-2.87617	0.0271321	0.112987	-3.90006	0.0412152	0.0963756
A0A0B4KEK1	A0A0B4KEK1	E(Pc)	TRUE	2	-0.025609	-0.354072	0.302854	25.1291	-0.189223	0.855952	0.907942	-6.88519	0.331199	0.135337
A0A0B4KER0	A0A0B4KER0	row	FALSE	0	-0.173035	-0.434259	0.0881889	31.0752	-1.60764	0.157367	0.312698	-5.66602	0.114066	0.107633
A0A0B4KEW3	A0A0B4KEW3	Zasp52	FALSE	0	-0.114925	-0.471312	0.241461	25.7366	-0.782642	0.46263	0.61714	-6.57009	0.22512	0.146843
A0A0B4KEX0	A0A0B4KEX0	clu	FALSE	0	0.265495	-0.143485	0.674476	27.777	1.57552	0.164541	0.320528	-5.70761	0.116922	0.168513
A0A0B4KF46	A0A0B4KF46	Uba1	TRUE	1	0.426872	-0.421881	1.27562	25.6314	1.22063	0.266538	0.426461	-6.13895	0.155564	0.349714
A0A0B4KF79	A0A0B4KF79	CG14657	TRUE	7	0.289272	-0.271794	0.850338	24.4467	1.2513	0.2559	0.41682	-6.10407	0.152048	0.231177
A0A0B4KFB8	A0A0B4KFB8	CG42724	FALSE	0	1.09238	0.638386	1.54638	27.4496	5.83969	0.000983417	0.0243634	-0.352344	0.00888726	0.187062
A0A0B4KFE9	A0A0B4KFE9	Mtor	FALSE	0	0.116565	-0.134359	0.36749	32.3759	1.12745	0.301224	0.464538	-6.24163	0.169454	0.103389
A0A0B4KFJ7	A0A0B4KFJ7	Kdm2	TRUE	2	0.272908	-0.415342	0.961157	25.611	0.962362	0.371829	0.532771	-6.40986	0.194344	0.283581
A0A0B4KFN0	A0A0B4KFN0	Taf12	TRUE	7	-0.638556	-1.27867	0.00155863	24.8578	-2.42108	0.0504107	0.160645	-4.54281	0.0586	0.263748
A0A0B4KFV4	A0A0B4KFV4	CG15107	FALSE	0	-0.349718	-0.515236	-0.184199	27.466	-5.1279	0.00195026	0.0319084	-1.08574	0.0116395	0.068199
A0A0B4KFZ9	A0A0B4KFZ9	His4r	FALSE	0	0.358121	0.161279	0.554963	35.223	4.41551	0.00413667	0.0454719	-1.89418	0.0165872	0.0811053
A0A0B4KG58	A0A0B4KG58	Patronin	FALSE	0	-0.422942	-0.66961	-0.176273	29.2723	-4.16136	0.00550556	0.0507681	-2.20151	0.0185192	0.101635
A0A0B4KG83	A0A0B4KG83	Arp5	FALSE	0	0.43793	0.198924	0.676936	25.4558	4.44698	0.00399547	0.0447959	-1.85683	0.0163406	0.0984781
A0A0B4KG97	A0A0B4KG97	fru	FALSE	0	0.0501551	-0.199201	0.299511	26.2237	0.488161	0.642194	0.761012	-6.77132	0.277602	0.102743
A0A0B4KGD7	A0A0B4KGD7	cic	TRUE	3	-0.177304	-0.80933	0.454723	24.8194	-0.68085	0.520533	0.667025	-6.64883	0.243317	0.260415
A0A0B4KGP8	A0A0B4KGP8	eIF2gamma	FALSE	0	-0.310599	-0.570323	-0.0508759	28.5097	-2.90241	0.0261997	0.112033	-3.86337	0.0408673	0.107014
A0A0B4KH12	A0A0B4KH12	bon	FALSE	0	-0.0194091	-0.31643	0.277612	27.3105	-0.158594	0.879021	0.919059	-6.89128	0.335254	0.122382
A0A0B4KH25	A0A0B4KH25	His2Av	FALSE	0	1.04607	0.614875	1.47726	36.0809	5.88784	0.000940979	0.0243634	-0.305258	0.00888726	0.177666
A0A0B4KH34	A0A0B4KH34	AnxB9	FALSE	0	0.0735546	-0.137462	0.284571	26.5148	0.845982	0.428951	0.584569	-6.51658	0.213239	0.0869458
A0A0B4KH51	A0A0B4KH51	Abi	FALSE	0	-0.251362	-0.693967	0.191242	27.4849	-1.37833	0.215702	0.37865	-5.95433	0.138124	0.182367
A0A0B4KHD9	A0A0B4KHD9	CG5746	FALSE	0	0.0899679	-0.312193	0.492129	28.0513	0.542946	0.606092	0.727879	-6.7402	0.265515	0.165703
A0A0B4KHE1	A0A0B4KHE1	CG15514	FALSE	0	-0.0526961	-0.430591	0.325198	25.7249	-0.338436	0.746185	0.832951	-6.84048	0.303843	0.155705
A0A0B4KHF2	A0A0B4KHF2	tmod	TRUE	4	-0.760567	-0.958218	-0.562916	24.842	-9.33913	6.97296e-05	0.00892539	2.40088	0.0032558	0.0814388
A0A0B4KHH6	A0A0B4KHH6	dgt1	FALSE	0	-0.185356	-0.38674	0.0160286	28.4336	-2.23383	0.0654195	0.19014	-4.80806	0.0693591	0.0829769
A0A0B4KHI4	A0A0B4KHI4	Syp	TRUE	1	0.0249934	-0.625664	0.675651	25.89	0.0932268	0.928659	0.950407	-6.90072	0.346689	0.268092
A0A0B4KHL2	A0A0B4KHL2	gammaCOP	FALSE	0	-0.115051	-0.416548	0.186447	26.9644	-0.926134	0.388951	0.548046	-6.4442	0.199916	0.124227
A0A0B4KHR8	A0A0B4KHR8	mask	FALSE	0	-0.189173	-0.421366	0.0430197	26.8074	-1.97733	0.0937562	0.231899	-5.16753	0.0845921	0.095671
A0A0B4KHS9	A0A0B4KHS9	Pp1alpha-96A	TRUE	1	-0.273805	-0.695278	0.147669	25.1874	-1.57666	0.16428	0.320528	-5.70613	0.116922	0.173661
A0A0B4KHX3	A0A0B4KHX3	dco	FALSE	0	-0.28814	-0.452486	-0.123794	28.3516	-4.25513	0.0049489	0.0481108	-2.08695	0.0175498	0.0677159
A0A0B4KI24	A0A0B4KI24	Nlp	FALSE	0	-0.261161	-0.549453	0.0271308	26.4795	-2.19859	0.0687246	0.194403	-4.85779	0.0709143	0.118786
A0A0B4KI32	A0A0B4KI32	cindr	TRUE	1	-0.532797	-1.22334	0.157746	25.2393	-1.87258	0.108631	0.252216	-5.31184	0.0920032	0.284526
A0A0B4KI43	A0A0B4KI43	woc	FALSE	0	-0.115339	-0.273145	0.0424674	29.1186	-1.77386	0.124774	0.272621	-5.44588	0.0994467	0.0650213
A0A0B4LEK8	A0A0B4LEK8	Sec24AB	TRUE	5	0.239848	-0.773106	1.2528	24.6813	0.574665	0.58572	0.716295	-6.72081	0.261289	0.417369
A0A0B4LEV3	A0A0B4LEV3	CG8635	FALSE	0	-0.149105	-0.483011	0.184801	26.392	-1.08377	0.318741	0.480534	-6.28792	0.175289	0.13758
A0A0B4LEV8	A0A0B4LEV8	coil	FALSE	0	-0.145329	-0.383261	0.0926024	28.4027	-1.48242	0.187108	0.347518	-5.82604	0.126768	0.0980356
A0A0B4LEY9	A0A0B4LEY9	Non1	FALSE	0	0.255732	0.0703741	0.44109	30.8698	3.34844	0.0146714	0.0834681	-3.25037	0.0304474	0.0763735
A0A0B4LF25	A0A0B4LF25	Prosap	TRUE	3	-0.324605	-0.902496	0.253286	25.0728	-1.36326	0.220157	0.381446	-5.97251	0.139144	0.23811
A0A0B4LF26	A0A0B4LF26	eIF3j	FALSE	0	0.130279	-0.398433	0.658991	25.7714	0.598032	0.570971	0.703297	-6.7059	0.256548	0.217846
A0A0B4LF82	A0A0B4LF82	Sin3A	FALSE	0	-0.102813	-0.257365	0.051739	30.2771	-1.61452	0.155871	0.311841	-5.65708	0.113753	0.0636804
A0A0B4LFB3	A0A0B4LFB3	eIF3m	TRUE	1	-0.886125	-2.54371	0.771461	23.9993	-1.29744	0.240591	0.402278	-6.05062	0.146743	0.682979
A0A0B4LFB8	A0A0B4LFB8	Opa1	FALSE	0	0.130654	-0.0352197	0.296528	28.1648	1.91167	0.102823	0.24639	-5.2582	0.0898779	0.0683453
A0A0B4LFD2	A0A0B4LFD2	Hsc70-5	FALSE	0	0.370706	-0.0148195	0.756232	25.9704	2.3337	0.056912	0.173674	-4.66672	0.0633527	0.158849
A0A0B4LFD9	A0A0B4LFD9	RpS23	FALSE	0	0.06041	-0.105104	0.225924	28.7452	0.885816	0.408705	0.566581	-6.48124	0.206677	0.0681969
A0A0B4LFK8	A0A0B4LFK8	Dcr-2	TRUE	5	0.0317819	-1.02044	1.08401	24.2034	0.0733061	0.943867	0.963309	-6.90263	0.351395	0.433551
A0A0B4LFL2	A0A0B4LFL2	eIF3c	FALSE	0	0.201278	-0.10144	0.503995	27.9481	1.61371	0.156045	0.311841	-5.65813	0.113753	0.124729
A0A0B4LFL3	A0A0B4LFL3	eEF1beta	FALSE	0	-0.45138	-0.620146	-0.282614	30.8673	-6.4912	0.000553244	0.0184735	0.259499	0.00673877	0.0695372
A0A0B4LFW6	A0A0B4LFW6	Rme-8	FALSE	0	0.331801	-0.987912	1.65151	25.4075	0.610193	0.563384	0.698432	-6.69792	0.254774	0.543764
A0A0B4LFY2	A0A0B4LFY2	CG11007	TRUE	1	-0.00342024	-0.252131	0.24529	24.7301	-0.0333757	0.974422	0.981746	-6.90507	0.358121	0.102477
A0A0B4LG52	A0A0B4LG52	RpS16	FALSE	0	0.164933	-0.0470783	0.376944	30.5674	1.88807	0.106292	0.250405	-5.29063	0.0913427	0.0873554
A0A0B4LGC6	A0A0B4LGC6	l(2)k09913	FALSE	0	0.0807049	-0.107879	0.269289	25.5693	1.03864	0.337712	0.498296	-6.33444	0.181768	0.0777026
A0A0B4LGG6	A0A0B4LGG6	Lpt	FALSE	0	0.090377	-0.0828335	0.263588	25.4342	1.26635	0.250816	0.412477	-6.08676	0.150463	0.0713683
A0A0B4LGH1	A0A0B4LGH1	betaTub60D	FALSE	0	0.1631	-0.0233467	0.349548	27.5072	2.12309	0.0763957	0.206956	-4.96406	0.0754931	0.0768222
A0A0B4LGR2	A0A0B4LGR2	ctrip	FALSE	0	0.0416018	-0.26579	0.348994	25.3544	0.328464	0.753355	0.838194	-6.84424	0.305756	0.126655
A0A0B4LGT9	A0A0B4LGT9	CG9667	TRUE	1	-0.638977	-1.18556	-0.0923947	25.4088	-2.83726	0.0285811	0.114923	-3.95458	0.0419215	0.225209
A0A0B4LGV1	A0A0B4LGV1	EMC1	FALSE	0	0.114467	-0.0404537	0.269388	27.1568	1.79325	0.121429	0.267596	-5.41973	0.0976136	0.0638325
A0A0B4LGV6	A0A0B4LGV6	Ibf1	FALSE	0	-0.0894383	-0.328889	0.150012	30.0565	-0.906519	0.398469	0.558438	-6.46238	0.203707	0.0986613
A0A0B4LGW1	A0A0B4LGW1	sub	FALSE	0	-0.0231367	-0.311066	0.264793	25.8758	-0.195022	0.851601	0.906535	-6.88392	0.330685	0.118636
A0A0B4LGZ0	A0A0B4LGZ0	Unc-115a	FALSE	0	-0.121835	-0.36993	0.12626	27.3853	-1.19185	0.276868	0.438875	-6.17121	0.160092	0.102223
A0A0B4LGZ5	A0A0B4LGZ5	RpL11	FALSE	0	-0.237644	-0.485547	0.0102593	29.3393	-2.32655	0.0574809	0.174487	-4.67684	0.0636494	0.102144
A0A0B4LH50	A0A0B4LH50	Act87E	FALSE	0	-0.119575	-0.368173	0.129023	28.8173	-1.16737	0.28592	0.449052	-6.19827	0.163805	0.10243
A0A0B4LHC1	A0A0B4LHC1	RhoGAP92B	FALSE	0	0.0799562	-0.152492	0.312404	27.5629	0.834825	0.434751	0.588869	-6.52625	0.214807	0.0957761
A0A0B4LHE5	A0A0B4LHE5	pre-mod(mdg4)-P	TRUE	5	-0.499214	-0.849876	-0.148553	24.6103	-3.45516	0.012826	0.078489	-3.10725	0.0286312	0.144484
A0A0B4LHE8	A0A0B4LHE8	pre-mod(mdg4)-B	TRUE	3	-0.18494	-0.5314	0.16152	24.8773	-1.29553	0.241209	0.402278	-6.05286	0.146743	0.142753
A0A0B4LHF7	A0A0B4LHF7	pit	FALSE	0	0.228842	0.0214353	0.436248	30.999	2.67782	0.0354411	0.13321	-4.17905	0.0485923	0.0854581
A0A0B4LHH1	A0A0B4LHH1	Gpat4	TRUE	6	0.309082	-0.0518154	0.66998	24.4359	2.07854	0.0813255	0.216598	-5.02651	0.0790106	0.148702
A0A0B4LHR3	A0A0B4LHR3	XNP	FALSE	0	0.0713551	-0.134029	0.276739	28.3715	0.843195	0.430394	0.584569	-6.519	0.213239	0.0846247
A0A0B4LHU8	A0A0B4LHU8	kay	TRUE	1	0.684163	-0.484142	1.85247	26.2008	1.42126	0.203458	0.366798	-5.90199	0.1338	0.481379
A0A0B4LI25	A0A0B4LI25	ncd	FALSE	0	0.201883	-0.114642	0.518408	31.1102	1.54796	0.170939	0.326233	-5.74299	0.119003	0.130418
A0A0B4LI86	A0A0B4LI86	RpII140	FALSE	0	-0.102193	-0.311165	0.106779	31.8709	-1.18687	0.27869	0.44054	-6.17675	0.1607	0.0861033
A0A0B4LIF3	A0A0B4LIF3	Nelf-A	FALSE	0	0.101322	-0.0776825	0.280327	26.9795	1.37375	0.217047	0.379276	-5.95987	0.138352	0.0737557
A0A0B4LIF8	A0A0B4LIF8	pre-mod(mdg4)-J	FALSE	0	0.207257	-0.137955	0.552469	25.525	1.45711	0.19372	0.355946	-5.85765	0.129842	0.142238
A0A0B4LIJ0	A0A0B4LIJ0	Rpt2	FALSE	0	0.321801	0.0916745	0.551928	25.9938	3.39382	0.0138533	0.0809074	-3.18932	0.0295133	0.0948196
A0A0C4DHA1	A0A0C4DHA1	Cdep	TRUE	5	-0.216363	-0.526081	0.0933555	24.7826	-1.69545	0.139245	0.291657	-5.55071	0.106391	0.127614
A0A0C4DHE8	A0A0C4DHE8	RpS29	FALSE	0	0.0778574	-0.191841	0.347556	26.8051	0.700631	0.508921	0.657446	-6.63425	0.239823	0.111125
A0A0C4DHG4	A0A0C4DHG4	CG10265	FALSE	0	-0.229792	-0.577099	0.117515	26.0568	-1.6058	0.157771	0.313097	-5.66843	0.114211	0.143102
A0A0C4DHG5	A0A0C4DHG5	B52	FALSE	0	-0.11919	-0.335671	0.0972904	31.4222	-1.33626	0.228345	0.389708	-6.00481	0.142158	0.089197
A0A0S0WNN6	A0A0S0WNN6	emb	TRUE	1	0.246078	-0.0765185	0.568675	24.5056	1.85132	0.111923	0.255825	-5.34088	0.0933196	0.13292
A0A126GUM1	A0A126GUM1	psq	FALSE	0	-0.0122441	-0.411048	0.38656	26.2908	-0.0745139	0.942944	0.963007	-6.90252	0.351285	0.16432
A0A126GUM8	A0A126GUM8	lig	FALSE	0	-0.65354	-0.91282	-0.394261	31.6888	-6.11748	0.000765195	0.022248	-0.0848714	0.00811562	0.106832
A0A126GUS7	A0A126GUS7	Fmr1	TRUE	5	0.991217	0.176749	1.80568	24.8928	2.95368	0.0244755	0.106785	-3.79184	0.0389529	0.335587
A0A126GUT1	A0A126GUT1	Tctp	TRUE	6	0.363461	-0.789207	1.51613	24.821	0.765283	0.472177	0.625207	-6.58416	0.228063	0.474936
A0A126GUU7	A0A126GUU7	Bin1	FALSE	0	0.13901	-0.21665	0.494669	29.9554	0.948593	0.378267	0.537979	-6.42303	0.196244	0.146543
A0A126GUW2	A0A126GUW2	l(3)07882	FALSE	0	-0.121756	-0.311836	0.0683242	29.8842	-1.55461	0.169375	0.326233	-5.73448	0.119003	0.0783192
A0A126GUY7	A0A126GUY7	pre-mod(mdg4)-N	TRUE	1	0.558915	-0.634901	1.75273	26.3503	1.13626	0.297788	0.461744	-6.23214	0.168435	0.491891
A0A126GUZ1	A0A126GUZ1	pre-mod(mdg4)-V	FALSE	0	-0.153043	-0.367504	0.0614189	27.9	-1.73194	0.13232	0.283859	-5.50213	0.103546	0.0883651
A0A126GV10	A0A126GV10	spas	TRUE	7	0.360417	0.083054	0.637781	24.4367	3.15374	0.0188312	0.0954613	-3.51523	0.0348223	0.114283
A0A126GV30	A0A126GV30	Apc	TRUE	6	-0.0945972	-0.806617	0.617423	24.5368	-0.322444	0.757697	0.84152	-6.84645	0.306969	0.293375
A0A1Z1CGZ3	A0A1Z1CGZ3	CG5316	TRUE	6	-0.554457	-0.915663	-0.19325	24.7157	-3.72546	0.00919583	0.0644968	-2.75182	0.0235271	0.148829
A0A4D6K557	A0A4D6K557		FALSE	0	0.239573	-0.198752	0.677898	27.8103	1.32651	0.231367	0.392251	-6.01639	0.143085	0.180604
A1A708	A1A708	CG4951	TRUE	1	0.651805	-0.63802	1.94163	25.9737	1.22647	0.264486	0.424504	-6.13236	0.15485	0.53145
A1YK02	A1YK02	Nup75	FALSE	0	0.22042	-0.0919674	0.532807	30.1136	1.71248	0.13597	0.288466	-5.52807	0.105227	0.128714
A1Z6E6	A1Z6E6	d4	FALSE	0	-0.119514	-0.466456	0.227429	25.8077	-0.836045	0.434114	0.588525	-6.52519	0.214682	0.142951
A1Z6H7	A1Z6H7	Gp210	FALSE	0	0.359594	0.112526	0.606662	33.0567	3.53235	0.0116501	0.0744833	-3.00469	0.02717	0.1018
A1Z6M0	A1Z6M0	Bap170	FALSE	0	0.141624	-0.0444757	0.327723	28.2344	1.84697	0.11261	0.25663	-5.34681	0.0936132	0.076679
A1Z6Q0	A1Z6Q0	koi	FALSE	0	-0.370665	-0.595957	-0.145373	29.9651	-3.99304	0.00668864	0.0552173	-2.41056	0.0201421	0.0928277
A1Z6Z3	A1Z6Z3	Aldh-III	FALSE	0	-0.237378	-0.489763	0.0150056	27.8067	-2.2827	0.0611037	0.182719	-4.73895	0.0666521	0.10399
A1Z729	A1Z729	CG2064	TRUE	2	-0.599775	-1.35196	0.152409	25.1554	-1.93523	0.0994733	0.241376	-5.22575	0.088049	0.309924
A1Z768	A1Z768	rnh1	TRUE	4	0.0604596	-0.386754	0.507673	24.2756	0.32811	0.753611	0.838194	-6.84437	0.305756	0.184266
A1Z784	A1Z784	ACC	FALSE	0	-0.712166	-1.0713	-0.353033	29.8265	-4.81276	0.00269632	0.0348029	-1.43385	0.0126954	0.147975
A1Z7H3	A1Z7H3	Acsl	FALSE	0	-0.0253411	-0.254831	0.204149	27.0426	-0.267997	0.797382	0.868022	-6.86467	0.316636	0.0945574
A1Z7J7	A1Z7J7	Sec31	TRUE	2	-0.858671	-1.31239	-0.404952	25.1402	-4.59313	0.00340668	0.0408801	-1.68535	0.0149122	0.186947
A1Z7K2	A1Z7K2	CG30349	FALSE	0	-0.012573	-0.190961	0.165815	29.8268	-0.171058	0.869617	0.912969	-6.88893	0.333032	0.0735016
A1Z7K8	A1Z7K8	AIMP1	FALSE	0	-0.779294	-0.954323	-0.604264	27.501	-10.8059	2.95197e-05	0.00539248	3.24615	0.00196707	0.0721177
A1Z7L1	A1Z7L1	FANCI	TRUE	3	0.371531	0.0548125	0.68825	24.5345	2.84702	0.0282099	0.114027	-3.94089	0.0415948	0.130498
A1Z7P7	A1Z7P7	Su(var)2-10	FALSE	0	-0.0549398	-0.224968	0.115088	28.4916	-0.784214	0.461772	0.616766	-6.5688	0.224984	0.0700571
A1Z818	A1Z818	tea	TRUE	3	0.370825	-0.264909	1.00656	24.8553	1.41567	0.205014	0.368306	-5.90884	0.134351	0.261943
A1Z830	A1Z830	CG12128	FALSE	0	-0.316229	-0.518107	-0.11435	27.9628	-3.80172	0.00838896	0.0616528	-2.65347	0.0224897	0.0831805
A1Z898	A1Z898	Caf1-105	TRUE	1	-0.16293	-0.977094	0.651233	25.8456	-0.48569	0.643849	0.761905	-6.77266	0.277927	0.335462
A1Z8D0	A1Z8D0	nclb	TRUE	3	-0.356977	-0.774364	0.0604095	24.8065	-2.07573	0.0816474	0.216598	-5.03045	0.0790106	0.171977
A1Z8D5	A1Z8D5	CG18004	FALSE	0	0.414864	0.165641	0.664086	27.4488	4.04005	0.00633203	0.0542124	-2.35174	0.0197756	0.102688
A1Z8J0	A1Z8J0	CG7741	TRUE	4	0.05671	-0.219588	0.333009	24.4784	0.498139	0.635535	0.754974	-6.76588	0.275399	0.113844
A1Z8M2	A1Z8M2	tou	FALSE	0	0.153121	-0.0347787	0.341021	27.2495	1.97778	0.0936974	0.231899	-5.16691	0.0845921	0.0774208
A1Z8R2	A1Z8R2	ADD1	FALSE	0	-0.309384	-0.486185	-0.132583	25.0862	-4.247	0.00499462	0.0482283	-2.09683	0.0175927	0.0728477
A1Z8S6	A1Z8S6	pds5	FALSE	0	0.275495	0.0493666	0.501623	26.3898	2.95684	0.0243734	0.10666	-3.78745	0.0389073	0.0931721
A1Z8U0	A1Z8U0	Prp8	FALSE	0	0.329039	0.164538	0.493541	31.8596	4.85452	0.00258102	0.0346049	-1.38686	0.0126232	0.0677799
A1Z909	A1Z909	CG8545	FALSE	0	0.0793009	-0.0946707	0.253272	30.73	1.10629	0.309607	0.472719	-6.26421	0.172438	0.0716819
A1Z934	A1Z934	CG8778	TRUE	1	-0.172346	-0.595778	0.251086	25.3765	-0.987839	0.360144	0.522057	-6.38514	0.190436	0.174468
A1Z968	A1Z968	NAT1	FALSE	0	-0.441689	-0.737322	-0.146056	27.616	-3.62604	0.0103795	0.0693172	-2.88134	0.0252855	0.12181
A1Z987	A1Z987	Cap-G	FALSE	0	0.354062	0.184066	0.524057	27.6787	5.05486	0.00209981	0.0329113	-1.1651	0.0120053	0.0700438
A1Z9E2	A1Z9E2	mip120	FALSE	0	0.504196	0.33398	0.674412	28.9002	7.189	0.000313377	0.0146378	0.858346	0.00533956	0.0701344
A1Z9E3	A1Z9E3	mEFTu1	FALSE	0	-0.397158	-0.771362	-0.0229542	27.5046	-2.57587	0.0407307	0.142187	-4.3233	0.051867	0.154184
A1Z9G2	A1Z9G2	fand	FALSE	0	0.216897	-0.158935	0.592729	27.1103	1.40065	0.209255	0.372441	-5.92722	0.135859	0.154855
A1Z9I5	A1Z9I5	tum	FALSE	0	0.101243	-0.180009	0.382495	30.261	0.873649	0.414813	0.572464	-6.49217	0.208823	0.115885
A1Z9J1	A1Z9J1	shot	TRUE	5	0.166847	-0.705798	1.03949	24.6854	0.464033	0.658446	0.769691	-6.78406	0.280767	0.359558
A1Z9J3	A1Z9J3	shot	FALSE	0	0.444852	-0.0513127	0.941016	29.0871	2.176	0.0709339	0.198355	-4.88964	0.0723558	0.204436
A1Z9L3	A1Z9L3	pea	FALSE	0	0.369724	-0.0964271	0.835875	26.9777	1.92495	0.100922	0.243352	-5.23993	0.0887699	0.192069
A1Z9S6	A1Z9S6	Su(var)2-HP2	FALSE	0	-0.179963	-0.372881	0.0129538	29.5688	-2.26403	0.0627164	0.185255	-4.76536	0.0675771	0.0794881
A1Z9S8	A1Z9S8	CG12863	FALSE	0	-0.278353	-0.619153	0.0624477	25.9347	-1.98228	0.0931067	0.231435	-5.16067	0.0844227	0.140421
A1ZA22	A1ZA22	eIF2Bgamma	FALSE	0	-0.0479951	-0.25557	0.15958	24.7087	-0.561164	0.594342	0.721355	-6.72919	0.263135	0.0855277
A1ZA92	A1ZA92	CG8414	FALSE	0	-0.0155134	-0.177595	0.146569	30.0907	-0.232295	0.823776	0.887943	-6.87483	0.323903	0.066783
A1ZAK1	A1ZAK1	IntS8	TRUE	2	0.354537	-0.27099	0.980063	25.8466	1.37558	0.21651	0.379056	-5.95766	0.138272	0.257737
A1ZAK9	A1ZAK9	Psi	TRUE	3	-0.261563	-0.654407	0.13128	25.4657	-1.61594	0.155562	0.311841	-5.65523	0.113753	0.161864
A1ZAV3	A1ZAV3	MESR4	FALSE	0	0.117899	-0.139068	0.374866	28.2311	1.11353	0.306716	0.4705	-6.25651	0.171629	0.105879
A1ZBB4	A1ZBB4	CG30122	FALSE	0	-0.00259075	-0.182027	0.176845	28.7067	-0.0350416	0.973146	0.98159	-6.90501	0.358064	0.0739335
A1ZBE9	A1ZBE9	MetRS	FALSE	0	0.0371101	-0.178635	0.252855	29.9901	0.417465	0.690388	0.79374	-6.80693	0.28954	0.0888938
A1ZBJ2	A1ZBJ2	CG7461	FALSE	0	0.0149197	-0.256219	0.286059	25.2344	0.133548	0.897983	0.931332	-6.89548	0.339731	0.111718
A1ZBT5	A1ZBT5	MED8	TRUE	7	-0.406707	-0.86572	0.0523064	24.6378	-2.15043	0.0735218	0.202728	-4.92564	0.0739509	0.189128
A1ZBW1	A1ZBW1	HnRNP-K	FALSE	0	-0.583448	-0.821806	-0.34509	28.1699	-5.94074	0.000896733	0.0243634	-0.253877	0.00888726	0.0982113
A1ZBW6	A1ZBW6	CG11180	FALSE	0	-0.360335	-0.53334	-0.18733	27.832	-5.05494	0.00209963	0.0329113	-1.16501	0.0120053	0.0712837
A4V2B8	A4V2B8	CkIIalpha	FALSE	0	-0.0806085	-0.283844	0.122627	30.2101	-0.96261	0.371714	0.532771	-6.40963	0.194344	0.0837396
A4V2K7	A4V2K7	D1	FALSE	0	0.521843	0.103844	0.939841	32.1864	3.02994	0.0221334	0.103134	-3.68592	0.0376211	0.172229
A4V2S3	A4V2S3	CtBP	FALSE	0	-0.1471	-0.348598	0.0543986	28.3353	-1.77178	0.125139	0.273031	-5.44869	0.0995961	0.0830238
A4V303	A4V303	CCT3	FALSE	0	0.049863	-0.29928	0.399006	26.0744	0.346613	0.740326	0.83003	-6.83732	0.302778	0.143858
A4V391	A4V391	CCT1	FALSE	0	-0.289407	-0.590165	0.0113521	26.6598	-2.33539	0.0567787	0.173674	-4.66433	0.0633527	0.123922
A4V3G8	A4V3G8	ball	FALSE	0	-0.0630169	-0.305587	0.179553	29.5549	-0.630506	0.550848	0.688751	-6.68429	0.251242	0.0999466
A4V3J6	A4V3J6	Hrb98DE	FALSE	0	0.0477582	-0.279457	0.374973	32.8934	0.354228	0.734887	0.82574	-6.83431	0.301213	0.134823
A4V4A1	A4V4A1	Klp10A	FALSE	0	-0.115029	-0.369605	0.139546	28.3481	-1.09663	0.313497	0.476763	-6.27442	0.173913	0.104893
A4V4A5	A4V4A5	Ran	FALSE	0	-0.339706	-0.494576	-0.184836	29.1738	-5.3236	0.00160548	0.0310667	-0.876951	0.0113325	0.0638114
A4V4I8	A4V4I8	shi	FALSE	0	0.208586	0.0135062	0.403665	26.7745	2.59503	0.0396765	0.140099	-4.29617	0.0511053	0.080379
A8DYB0	A8DYB0	CG13185	FALSE	0	-0.443146	-2.32138	1.43509	25.9758	-0.572618	0.587023	0.717234	-6.72209	0.261632	0.773894
A8DYD2	A8DYD2	cg	FALSE	0	-0.0789701	-0.294946	0.137006	29.2276	-0.887413	0.407909	0.565994	-6.4798	0.206463	0.0889891
A8DYI6	A8DYI6	Phb2	FALSE	0	0.16678	-0.24867	0.58223	29.8719	0.974302	0.366317	0.528353	-6.39833	0.192732	0.171179
A8DYK5	A8DYK5	CG4266	FALSE	0	-0.140904	-0.342682	0.0608745	26.8861	-1.69479	0.139373	0.291657	-5.55157	0.106391	0.0831391
A8DYV8	A8DYV8	CG34179	TRUE	4	0.341626	-0.517083	1.20034	24.7531	0.965548	0.370352	0.531645	-6.4068	0.193933	0.353816
A8JNL9	A8JNL9	CG10274	TRUE	4	-0.582573	-1.16063	-0.00451825	25.0434	-2.44596	0.048705	0.157829	-4.50751	0.0575727	0.238177
A8JUV0	A8JUV0	sno	FALSE	0	0.126001	-0.110557	0.36256	25.5708	1.29272	0.242118	0.402918	-6.05613	0.146976	0.0974696
A8JUY3	A8JUY3	RpIIIC160	TRUE	2	1.48063	0.241817	2.71944	26.1837	2.90074	0.0262577	0.112033	-3.86569	0.0408673	0.510431
A8Y560	A8Y560	RpL15	FALSE	0	0.396236	0.195396	0.597076	31.9794	4.78819	0.00276685	0.0349005	-1.46162	0.012731	0.0827528
B7YZQ1	B7YZQ1	Slik	FALSE	0	0.261886	-0.181902	0.705673	28.0537	1.43221	0.200438	0.363261	-5.88851	0.13251	0.182855
B7YZQ7	B7YZQ7	Nurf-38	FALSE	0	-0.0272285	-0.214988	0.160531	26.6	-0.351958	0.736507	0.826955	-6.83522	0.301656	0.0773629
B7Z0D7	B7Z0D7	CG7504	FALSE	0	0.175675	-0.0850607	0.43641	26.5483	1.63523	0.151445	0.30669	-5.63005	0.111874	0.107431
B7Z0G1	B7Z0G1	hay	FALSE	0	-0.0582156	-0.368016	0.251585	26.2385	-0.456063	0.66386	0.773664	-6.78814	0.282217	0.127648
B7Z0I8	B7Z0I8	CG42232	FALSE	0	0.172986	-0.0658924	0.411865	32.4988	1.75753	0.127662	0.276962	-5.46784	0.10103	0.0984257
B7Z0R6	B7Z0R6	Doa	FALSE	0	0.254226	0.0949156	0.413537	29.6704	3.87297	0.00770526	0.0590105	-2.56236	0.0215258	0.0656411
B7Z0V1	B7Z0V1	Taf7	FALSE	0	0.130605	-0.13852	0.39973	26.6011	1.17781	0.282031	0.443852	-6.18678	0.161908	0.110888
B7Z120	B7Z120	Tlk	FALSE	0	-0.294793	-0.505507	-0.0840783	28.4746	-3.3954	0.0138258	0.0809074	-3.18721	0.0295133	0.0868212
C0HL67	C0HL67		FALSE	0	0.433531	-0.495501	1.36256	30.9516	1.13255	0.299229	0.462855	-6.23614	0.16884	0.382791
C7LA75	C7LA75	Hsc70-4	FALSE	0	0.167335	0.00327031	0.3314	32.7396	2.47537	0.0467664	0.154174	-4.46579	0.0562394	0.0676
C9QP42	C9QP42	eIF4A	FALSE	0	0.0581902	-0.162469	0.278849	27.7042	0.640024	0.545033	0.68229	-6.67777	0.248885	0.0909187
D2NUK9	D2NUK9	hoip	FALSE	0	-0.649239	-0.893882	-0.404597	30.4036	-6.44083	0.000577476	0.0188724	0.214083	0.00688426	0.100801
D5AEK7	D5AEK7	Agpat3	FALSE	0	-0.0701411	-0.335171	0.194889	28.0182	-0.642312	0.543641	0.68153	-6.67619	0.248608	0.109201
E1JGK7	E1JGK7	lolal	FALSE	0	-0.246064	-0.473799	-0.0183286	26.1725	-2.62232	0.0382238	0.13614	-4.25752	0.0496612	0.0938343
E1JGZ8	E1JGZ8	LRR	FALSE	0	0.128353	-0.141529	0.398234	26.9351	1.15425	0.290875	0.454511	-6.21263	0.165796	0.1112
E1JH57	E1JH57	mars	FALSE	0	0.17586	-0.166983	0.518703	28.237	1.24492	0.258083	0.419067	-6.11137	0.152867	0.141262
E1JH79	E1JH79	Mlf	FALSE	0	-0.148765	-0.33407	0.0365403	28.6057	-1.94842	0.0976465	0.23845	-5.20755	0.0869816	0.0763516
E1JHA4	E1JHA4	Hrb27C	FALSE	0	-0.192356	-0.484421	0.0997096	32.0285	-1.59843	0.159393	0.31493	-5.67798	0.11488	0.12034
E1JHK0	E1JHK0	CLIP-190	FALSE	0	-0.629899	-0.965444	-0.294353	25.853	-4.55605	0.00354626	0.0419004	-1.72855	0.0152844	0.138256
E1JI11	E1JI11	Taf4	FALSE	0	0.0836197	-0.0771797	0.244419	28.0024	1.2621	0.252243	0.413022	-6.09166	0.150662	0.0662546
E1JI58	E1JI58	Sin	TRUE	1	-0.0634695	-0.345818	0.218879	24.6035	-0.545568	0.604393	0.726406	-6.73864	0.264978	0.116337
E1JIC9	E1JIC9	TfIIEbeta	TRUE	6	-0.142835	-0.66888	0.383209	24.4843	-0.658994	0.53356	0.674525	-6.66451	0.246053	0.216747
E1JIK0	E1JIK0	Hrb87F	FALSE	0	0.130262	-0.194437	0.454962	33.3629	0.973656	0.366613	0.528353	-6.39896	0.192732	0.133787
E1JIP3	E1JIP3	WRNexo	TRUE	3	-0.75395	-2.131	0.623097	25.5218	-1.32881	0.230651	0.391902	-6.01366	0.142958	0.567388
E1JIT0	E1JIT0	how	TRUE	2	-0.786972	-1.11027	-0.463672	25.45	-5.90774	0.000924049	0.0243634	-0.285886	0.00888726	0.13321
E1JIT7	E1JIT7	Efa6	TRUE	4	0.205326	-0.658692	1.06934	25.231	0.576753	0.584393	0.71585	-6.7195	0.261127	0.356003
E1JIV0	E1JIV0	CG5902	TRUE	7	0.637859	0.215472	1.06024	24.6145	3.66508	0.00989579	0.0674382	-2.83031	0.0246001	0.174037
E1JIZ7	E1JIZ7	CG42487	TRUE	5	0.00719472	-0.569155	0.583545	24.6195	0.0302968	0.976781	0.982538	-6.90519	0.35841	0.237475
E1JJ68	E1JJ68	Rm62	FALSE	0	0.199818	0.00532716	0.39431	32.8968	2.49347	0.0456137	0.151651	-4.44012	0.0553191	0.0801367
E1JJ72	E1JJ72	Taf1	FALSE	0	0.213009	-0.000809467	0.426828	29.9341	2.41781	0.0506401	0.161042	-4.54746	0.0587447	0.0881003
E1JJ73	E1JJ73	CG1307	TRUE	3	-0.458667	-1.10576	0.188421	24.6296	-1.72029	0.134493	0.286346	-5.51767	0.104453	0.266621
E1JJD6	E1JJD6	tyf	TRUE	3	-0.081901	-0.556234	0.392432	25.2019	-0.419058	0.689283	0.793063	-6.80619	0.289293	0.195441
E1JJI5	E1JJI5	CkIalpha	FALSE	0	0.0397771	-0.131212	0.210766	28.3061	0.56459	0.592147	0.720712	-6.72708	0.262901	0.0704531
E1JJM9	E1JJM9	RpS15Aa	FALSE	0	-0.0896817	-0.331852	0.152488	28.0275	-0.898778	0.402274	0.562232	-6.46947	0.205091	0.0997818
E1JJN9	E1JJN9	Set2	FALSE	0	0.233665	-0.0648563	0.532187	25.9067	1.89971	0.104567	0.249015	-5.27465	0.0908354	0.123
E1JJS2	E1JJS2	RhoGAP19D	FALSE	0	-0.19722	-0.375646	-0.018794	25.3902	-2.68263	0.0352102	0.132882	-4.17226	0.0484725	0.0735174
E2QC83	E2QC83	Pabp2	FALSE	0	0.0994948	-0.153184	0.352173	29.3289	0.955655	0.374954	0.534754	-6.4163	0.195067	0.104112
E2QCG7	E2QCG7	eIF3b	FALSE	0	0.202245	-0.262475	0.666965	27.9693	1.05622	0.330215	0.492612	-6.31648	0.179695	0.19148
E2QCY2	E2QCY2	CG3961	FALSE	0	0.286277	-0.086382	0.658936	27.5493	1.86442	0.109883	0.253424	-5.323	0.0924438	0.153547
E2QD64	E2QD64	NO66	FALSE	0	0.0336442	-0.182788	0.250076	29.9589	0.377274	0.718528	0.816316	-6.82483	0.297775	0.0891769
E2QD65	E2QD65	RpS19a	FALSE	0	-0.340265	-0.532053	-0.148478	27.6967	-4.30592	0.00467383	0.0480354	-2.02547	0.0175223	0.0790226
E2QD75	E2QD75	Cbp80	FALSE	0	0.41057	0.169965	0.651175	28.8447	4.14144	0.00563262	0.0508924	-2.22603	0.0185645	0.099137
E4NKG1	E4NKG1	Capr	FALSE	0	-0.327799	-0.606961	-0.0486367	28.9185	-2.84983	0.0281038	0.113927	-3.93694	0.0415582	0.115024
E8NH77	E8NH77	sw	FALSE	0	-0.257793	-0.540526	0.0249403	26.9481	-2.21291	0.0673617	0.193397	-4.8376	0.0705474	0.116495
E8NHB1	E8NHB1	Taf2	FALSE	0	0.0259904	-0.159574	0.211555	28.8255	0.339928	0.745114	0.832951	-6.83991	0.303843	0.0764585
F2FBA6	F2FBA6	Dsp1	FALSE	0	-0.211101	-0.411058	-0.011145	26.5923	-2.56227	0.0414972	0.144207	-4.34257	0.0526039	0.0823885
F3YDH0	F3YDH0	Hsc70-3	FALSE	0	0.0816645	-0.177675	0.341004	29.2375	0.764247	0.472751	0.625207	-6.58499	0.228063	0.106856
G3M3A2	G3M3A2	RpS3	FALSE	0	0.126511	-0.167549	0.420571	31.2803	1.04415	0.33535	0.495762	-6.32884	0.180844	0.121162
H0RNK7	H0RNK7	Rtf1	FALSE	0	0.00543987	-0.209042	0.219922	25.9877	0.0615553	0.95285	0.969257	-6.90354	0.353565	0.0883736
H0RNN8	H0RNN8	CG13096	FALSE	0	0.325733	0.0728629	0.578604	30.8466	3.12632	0.0195137	0.0963761	-3.55289	0.035156	0.104191
H8F4P0	H8F4P0	MED1	FALSE	0	0.279951	0.00312837	0.556773	26.049	2.45442	0.048139	0.157658	-4.49551	0.0575103	0.11406
L0MLK7	L0MLK7	zfh2	FALSE	0	-0.0291541	-0.266911	0.208603	24.9419	-0.297601	0.775713	0.853113	-6.85517	0.311198	0.0979637
M9MQH9	M9MQH9	Pp2A-29B	FALSE	0	0.210573	-0.0907478	0.511894	26.7226	1.69607	0.139125	0.291657	-5.54989	0.106391	0.124154
M9MRC9	M9MRC9	RpL27A	FALSE	0	0.128396	-0.117951	0.374744	30.7342	1.26495	0.251285	0.412747	-6.08837	0.150562	0.101503
M9MRF2	M9MRF2	RpL37A	FALSE	0	-0.0329127	-0.560225	0.4944	27.0645	-0.151483	0.884396	0.922222	-6.89255	0.336408	0.21727
M9MRG4	M9MRG4	Utx	FALSE	0	0.0304646	-0.187297	0.248226	25.8473	0.339534	0.745398	0.832951	-6.84006	0.303843	0.0897248
M9MRJ4	M9MRJ4	Msp300	FALSE	0	-0.0979534	-0.28647	0.0905629	30.7354	-1.26107	0.252589	0.413022	-6.09284	0.150662	0.0776748
M9MRM4	M9MRM4	Sac1	FALSE	0	0.172038	-0.134699	0.478775	28.0677	1.36121	0.220768	0.381671	-5.97497	0.139226	0.126386
M9MS35	M9MS35	Cfp1	FALSE	0	0.0239896	-0.224929	0.272908	25.4772	0.233902	0.822582	0.88728	-6.8744	0.323661	0.102563
M9MSJ7	M9MSJ7	CG42676	FALSE	0	0.927499	0.621519	1.23348	29.2715	7.3568	0.000275167	0.0146378	0.994358	0.00533956	0.126074
M9MSQ1	M9MSQ1	CG5004	FALSE	0	-0.0665897	-0.422955	0.289775	25.1319	-0.453503	0.665604	0.774521	-6.78943	0.282529	0.146834
M9NCM6	M9NCM6	spen	FALSE	0	0.17126	-0.0531619	0.395681	26.588	1.85208	0.111805	0.255825	-5.33985	0.0933196	0.0924689
M9NCS8	M9NCS8	Glt	FALSE	0	-0.151047	-0.395165	0.0930711	28.3789	-1.50169	0.182211	0.340482	-5.80179	0.124201	0.100584
M9ND19	M9ND19	Gale	FALSE	0	0.100242	-0.054384	0.254867	27.9586	1.57339	0.165028	0.320528	-5.71035	0.116922	0.0637107
M9ND28	M9ND28	Spn	FALSE	0	-0.393438	-0.745658	-0.0412178	27.1252	-2.71101	0.0338806	0.128813	-4.1322	0.0469884	0.145126
M9NDC3	M9NDC3	Fs(2)Ket	FALSE	0	0.217265	-0.0746659	0.509196	29.4509	1.80625	0.119233	0.264836	-5.40214	0.0966065	0.120285
M9NDH8	M9NDH8	mRpS6	TRUE	4	0.109708	-0.289229	0.508646	24.6548	0.667426	0.52851	0.670347	-6.65852	0.244529	0.164375
M9NDM4	M9NDM4	wds	FALSE	0	0.192301	-0.032355	0.416956	27.1052	2.07746	0.0814495	0.216598	-5.02803	0.0790106	0.0925654
M9NDP0	M9NDP0	CG9932	FALSE	0	0.0263702	-0.129478	0.182218	24.3362	0.410658	0.695118	0.798099	-6.81008	0.29113	0.0642145
M9NDP1	M9NDP1	ctp	FALSE	0	-0.178171	-0.550074	0.193732	27.947	-1.16272	0.287669	0.450877	-6.20337	0.16447	0.153236
M9NDS8	M9NDS8	Mbs	FALSE	0	0.113263	-0.203452	0.429979	25.499	0.867938	0.417702	0.574388	-6.49726	0.209525	0.130497
M9NDW1	M9NDW1	DIP2	TRUE	1	0.141236	-0.469387	0.751859	25.4042	0.561359	0.594217	0.721355	-6.72907	0.263135	0.251597
M9NDX3	M9NDX3	Top1	FALSE	0	-0.0945283	-0.269652	0.0805954	31.9116	-1.31004	0.236553	0.398354	-6.03583	0.145311	0.0721567
M9NE89	M9NE89	Lam	FALSE	0	0.150694	-0.0149809	0.316369	34.1233	2.20754	0.0678696	0.194036	-4.84517	0.0707803	0.0682635
M9NEA5	M9NEA5	ct	FALSE	0	0.663054	0.262178	1.06393	28.2588	4.01428	0.0065248	0.0544679	-2.38394	0.0198688	0.165174
M9NEF4	M9NEF4	CG17233	FALSE	0	-0.218462	-0.534244	0.0973198	27.0328	-1.67903	0.142475	0.296846	-5.57245	0.108283	0.130112
M9NEL3	M9NEL3	kis	FALSE	0	0.0307227	-0.13806	0.199506	30.5998	0.441774	0.673623	0.779552	-6.79528	0.284364	0.069544
M9NEQ9	M9NEQ9	RpS10b	FALSE	0	-0.705414	-0.988247	-0.42258	27.527	-6.05316	0.000810346	0.0230498	-0.145912	0.0084081	0.116537
M9NEU5	M9NEU5	chic	FALSE	0	0.0630371	-0.140354	0.266428	26.4466	0.7522	0.479462	0.631607	-6.5946	0.230397	0.0838036
M9NEV0	M9NEV0	lid	FALSE	0	-0.101093	-0.353123	0.150937	26.5178	-0.973505	0.366682	0.528353	-6.39911	0.192732	0.103844
M9NEY8	M9NEY8	Tet	TRUE	7	0.302457	0.0623176	0.542597	24.4647	3.05681	0.0213666	0.100672	-3.64872	0.036723	0.0989453
M9NF33	M9NF33	Cpsf6	FALSE	0	0.22758	0.0183305	0.436829	31.2193	2.6396	0.0373334	0.135554	-4.23308	0.0494473	0.0862174
M9NF67	M9NF67	nbs	TRUE	6	0.52094	0.0496588	0.992222	24.5376	2.68273	0.0352058	0.132882	-4.17213	0.0484725	0.194183
M9NFE1	M9NFE1	CG14200	FALSE	0	0.179961	-0.154371	0.514294	25.8965	1.30638	0.237721	0.39906	-6.04014	0.145569	0.137756
M9NFR5	M9NFR5	yps	FALSE	0	-0.134667	-0.375735	0.106401	25.7022	-1.35579	0.222396	0.382961	-5.98149	0.139696	0.0993277
M9NH51	M9NH51	U2af50	FALSE	0	-0.0959248	-0.270009	0.0781595	28.6414	-1.33733	0.228013	0.389708	-6.00353	0.142158	0.0717284
M9PB45	M9PB45	CG14005	TRUE	3	-0.074846	-0.561644	0.411952	24.6835	-0.373154	0.721441	0.818414	-6.82657	0.298541	0.200577
M9PB84	M9PB84	RpS2	FALSE	0	-0.0775536	-0.250604	0.0954969	29.8603	-1.08767	0.317143	0.478988	-6.28384	0.174725	0.0713024
M9PB96	M9PB96	CG6724	FALSE	0	-0.081002	-0.289474	0.12747	27.042	-0.943009	0.380902	0.541226	-6.42833	0.197428	0.0858974
M9PBE2	M9PBE2	Hakai	FALSE	0	0.53627	0.240511	0.83203	28.02	4.40061	0.00420545	0.0454719	-1.91191	0.0165872	0.121863
M9PBH8	M9PBH8	CG2199	FALSE	0	0.0902806	-0.10164	0.282201	31.4127	1.14167	0.295694	0.459688	-6.22629	0.167685	0.0790776
M9PBK5	M9PBK5	RpLP1	FALSE	0	-0.116641	-0.293989	0.0607062	26.9805	-1.59623	0.159881	0.31493	-5.68084	0.11488	0.0730729
M9PBL3	M9PBL3	Hsp83	FALSE	0	0.220365	0.0137219	0.427008	29.3502	2.58816	0.0400512	0.14069	-4.3059	0.0513208	0.0851437
M9PBM1	M9PBM1	U2af38	FALSE	0	-0.198685	-0.550309	0.152939	28.9925	-1.37137	0.217749	0.37964	-5.96274	0.138485	0.144881
M9PBM2	M9PBM2	enc	FALSE	0	-0.601422	-0.964249	-0.238596	26.7789	-4.02299	0.0064589	0.0542124	-2.37304	0.0197756	0.149496
M9PBN7	M9PBN7	cpb	TRUE	3	-0.221637	-1.15442	0.711149	24.8186	-0.576671	0.584445	0.71585	-6.71955	0.261127	0.384338
M9PBZ9	M9PBZ9	eIF4E1	FALSE	0	-0.187903	-0.715652	0.339846	27.3319	-0.864122	0.419642	0.575263	-6.50065	0.209844	0.21745
M9PC85	M9PC85	x16	FALSE	0	-0.136675	-0.365279	0.0919285	28.9747	-1.45103	0.195342	0.358049	-5.86521	0.130609	0.0941921
M9PC89	M9PC89	snRNP-U1-70K	FALSE	0	-0.285484	-0.518494	-0.0524738	29.9182	-2.97355	0.0238404	0.104925	-3.76419	0.0382746	0.0960077
M9PCF6	M9PCF6	lilli	TRUE	6	-0.181208	-0.665631	0.303216	24.7931	-0.907863	0.397811	0.558026	-6.46114	0.203556	0.199598
M9PCH8	M9PCH8	baf	FALSE	0	-0.104728	-0.345729	0.136272	27.77	-1.05466	0.330873	0.492612	-6.31808	0.179695	0.0993001
M9PCI2	M9PCI2	NHP2	FALSE	0	-0.154196	-0.382517	0.0741245	28.7438	-1.63907	0.150637	0.30669	-5.62502	0.111874	0.0940754
M9PCQ8	M9PCQ8	chico	TRUE	5	-0.398595	-0.881965	0.0847742	24.55	-2.00134	0.090644	0.227871	-5.1342	0.0831227	0.199164
M9PD08	M9PD08	eRF3	TRUE	6	-0.271365	-0.569711	0.0269808	24.5924	-2.20751	0.0678722	0.194036	-4.84521	0.0707803	0.122928
M9PD27	M9PD27	eRF1	FALSE	0	0.667512	0.175461	1.15956	29.8659	3.29244	0.0157544	0.0864241	-3.32607	0.0315257	0.202741
M9PD43	M9PD43	CG16865	TRUE	1	-0.0903643	-0.386422	0.205693	25.0955	-0.740781	0.485883	0.636246	-6.60358	0.232089	0.121985
M9PD50	M9PD50	skd	TRUE	3	-0.38377	-0.984899	0.217358	25.0712	-1.54943	0.170593	0.326233	-5.74111	0.119003	0.247684
M9PD94	M9PD94	crol	TRUE	1	-0.60184	-1.29107	0.0873881	25.3478	-2.11927	0.0768059	0.207335	-4.96942	0.0756317	0.283984
M9PDC7	M9PDC7	Dap160	FALSE	0	-0.380662	-0.938043	0.176719	26.6839	-1.65751	0.146816	0.301887	-5.60082	0.110122	0.229659
M9PDU3	M9PDU3	ush	TRUE	4	-0.292956	-1.02533	0.439419	24.9425	-0.970817	0.367919	0.529638	-6.40171	0.193201	0.301762
M9PDU4	M9PDU4	ND-ACP	TRUE	1	1.10684	0.918184	1.29549	24.7233	14.2391	5.645e-06	0.00407631	4.76502	0.00148695	0.0777321
M9PDV1	M9PDV1	dia	FALSE	0	-0.135942	-0.486508	0.214623	26.1041	-0.941141	0.381786	0.541481	-6.4301	0.197521	0.144444
M9PDW8	M9PDW8	CG34417	FALSE	0	-0.187228	-0.41792	0.0434628	29.2588	-1.96974	0.0947619	0.232887	-5.17804	0.0849523	0.0950522
M9PE12	M9PE12	E(bx)	FALSE	0	0.151483	-0.0131668	0.316132	30.7007	2.23291	0.0655033	0.19014	-4.80935	0.0693591	0.0678409
M9PE73	M9PE73	Dhc64C	FALSE	0	0.503173	0.224496	0.78185	30.0457	4.38213	0.00429259	0.0454719	-1.93397	0.0165872	0.114824
M9PEB2	M9PEB2	Chd1	FALSE	0	-0.083569	-0.63156	0.464422	25.31	-0.370118	0.723591	0.819642	-6.82784	0.298989	0.22579
M9PEJ2	M9PEJ2	Ist1	TRUE	6	-0.730149	-1.16899	-0.291305	24.7611	-4.03803	0.00634686	0.0542124	-2.35425	0.0197756	0.180818
M9PEY6	M9PEY6	Rat1	FALSE	0	-0.447214	-0.661008	-0.233419	27.8528	-5.07677	0.00205362	0.032858	-1.14121	0.0119859	0.0880901
M9PEZ4	M9PEZ4	thoc6	TRUE	4	-0.451606	-0.75068	-0.152532	24.7569	-3.6648	0.00989914	0.0674382	-2.83067	0.0246001	0.123228
M9PFF0	M9PFF0	RpL13	FALSE	0	-0.0168817	-0.229376	0.195612	30.4916	-0.192814	0.853257	0.906535	-6.88441	0.330685	0.0875544
M9PFL9	M9PFL9	cmet	TRUE	1	-0.000677663	-0.757495	0.75614	25.2569	-0.00217316	0.998334	0.998334	-6.90571	0.364172	0.311833
M9PFN1	M9PFN1	rept	FALSE	0	-0.000405805	-0.167585	0.166774	29.6931	-0.00589119	0.995484	0.996133	-6.90569	0.363369	0.0688833
M9PFP4	M9PFP4	Plp	TRUE	4	0.210102	-1.17101	1.59122	24.9593	0.369207	0.724237	0.81977	-6.82822	0.299035	0.569063
M9PFR0	M9PFR0	RhoGAP71E	TRUE	6	-0.261683	-0.882407	0.359041	24.2707	-1.02317	0.344423	0.505286	-6.35007	0.184318	0.255758
M9PFR5	M9PFR5	Su(var)3-3	TRUE	3	0.0310727	-0.379593	0.441738	24.6389	0.183637	0.860149	0.908658	-6.88638	0.33146	0.169207
M9PFS7	M9PFS7	Sfmbt	FALSE	0	0.106093	-0.0971928	0.30938	26.6358	1.26663	0.250722	0.412477	-6.08644	0.150463	0.0837605
M9PFV9	M9PFV9	TfIIS	TRUE	7	-0.0580443	-0.523071	0.406982	24.4621	-0.302936	0.771831	0.85146	-6.85335	0.310595	0.191606
M9PFY2	M9PFY2	CG6479	FALSE	0	0.0883919	-0.204249	0.381033	27.563	0.733071	0.490252	0.638158	-6.60958	0.232787	0.120578
M9PG47	M9PG47	RpS26	FALSE	0	0.0507232	-0.186848	0.288294	27.6947	0.518182	0.62227	0.744978	-6.75465	0.271753	0.0978868
M9PG50	M9PG50	Cdk12	FALSE	0	-0.0846522	-0.391422	0.222117	28.6684	-0.669723	0.527139	0.670008	-6.65687	0.244405	0.126399
M9PG55	M9PG55	CG10600	FALSE	0	0.240933	0.0223711	0.459494	27.4981	2.67541	0.0355574	0.13321	-4.18246	0.0485923	0.0900544
M9PG76	M9PG76	RpLP0	FALSE	0	0.0830031	-0.103006	0.269013	27.7168	1.083	0.319057	0.480534	-6.28873	0.175289	0.0766419
M9PGC9	M9PGC9	SMC5	TRUE	1	-0.361676	-0.578116	-0.145235	24.9332	-4.05555	0.00621907	0.0542124	-2.33242	0.0197756	0.0891805
M9PGK3	M9PGK3	CG43736	FALSE	0	-0.251423	-0.490811	-0.0120364	26.6103	-2.54902	0.0422582	0.145209	-4.36134	0.0529694	0.0986352
M9PGQ6	M9PGQ6	Bx42	FALSE	0	0.32144	0.119915	0.522966	28.5172	3.87114	0.00772208	0.0590105	-2.56469	0.0215258	0.0830352
M9PGS2	M9PGS2	usp	TRUE	6	-0.097663	-0.681504	0.486178	24.5952	-0.40598	0.698377	0.798146	-6.81222	0.291147	0.240561
M9PGW8	M9PGW8	bif	FALSE	0	0.13076	-0.0641346	0.325654	26.3327	1.62833	0.152904	0.308798	-5.63906	0.112643	0.0803027
M9PH59	M9PH59	RpL37a	FALSE	0	0.384071	0.0596207	0.708522	26.9155	2.87298	0.0272479	0.112987	-3.90453	0.0412152	0.133684
M9PHK2	M9PHK2	Tao	TRUE	4	-0.0522252	-0.725215	0.620764	24.7884	-0.188339	0.856616	0.907942	-6.88538	0.331199	0.277293
M9PHL0	M9PHL0	e(y)3	TRUE	2	0.033094	-0.492734	0.558922	24.6554	0.152748	0.88344	0.921851	-6.89233	0.336272	0.216658
M9PHM6	M9PHM6	RpL18	FALSE	0	0.192024	-0.0269174	0.410966	31.3178	2.12861	0.075806	0.206482	-4.9563	0.0753203	0.090211
M9PI05	M9PI05	JIL-1	FALSE	0	-0.115573	-0.311764	0.080618	31.321	-1.4297	0.201125	0.363444	-5.89159	0.132577	0.080837
M9PI07	M9PI07	FoxK	FALSE	0	-0.226854	-0.494183	0.0404752	28.7381	-2.05953	0.0835262	0.218287	-5.0531	0.0796267	0.110148
M9PI41	M9PI41	sti	FALSE	0	0.114847	-0.569105	0.798799	29.1259	0.407533	0.697294	0.798146	-6.81151	0.291147	0.28181
M9PI47	M9PI47	Sap130	FALSE	0	-0.0159907	-0.225406	0.193424	27.0768	-0.185323	0.858881	0.908067	-6.88603	0.331244	0.0862857
M9PIA6	M9PIA6	Mi-2	FALSE	0	0.124989	-0.0904592	0.340437	30.3914	1.40798	0.207175	0.370887	-5.91826	0.135292	0.0887715
M9PID3	M9PID3	HIPP1	FALSE	0	0.0114561	-0.189179	0.212091	27.6435	0.13858	0.894167	0.929886	-6.89469	0.339203	0.0826682
M9PIM0	M9PIM0	RpL10	FALSE	0	0.0955262	-0.134231	0.325283	30.33	1.00907	0.350628	0.512918	-6.36417	0.187102	0.0946673
M9PJE8	M9PJE8	e(r)	FALSE	0	-0.716365	-1.25387	-0.178855	27.8994	-3.23457	0.0169659	0.0902366	-3.40471	0.0329165	0.221471
M9PJN0	M9PJN0	mud	FALSE	0	0.0985797	-0.912124	1.10928	27.088	0.236719	0.820491	0.885646	-6.87365	0.323065	0.416442
M9PJN8	M9PJN8	Gapdh2	TRUE	2	-0.288904	-1.44047	0.862661	25.578	-0.608883	0.564198	0.698551	-6.69879	0.254817	0.474482
N0D8I3	N0D8I3	Spt6	FALSE	0	-0.112767	-0.291404	0.0658708	31.2805	-1.53207	0.174737	0.330858	-5.76328	0.12069	0.0736044
O01666	O01666	ATPsyngamma	FALSE	0	-0.344026	-0.588929	-0.099122	25.9672	-3.40929	0.013586	0.0802617	-3.16858	0.0292778	0.100908
O02193	O02193	mof	FALSE	0	0.254513	0.0210838	0.487942	29.0073	2.64621	0.036999	0.135554	-4.22374	0.0494473	0.0961803
O16102	O16102	Chd3	FALSE	0	0.0302882	-0.20002	0.260597	26.3272	0.319178	0.760056	0.843382	-6.84763	0.307648	0.0948945
O16797	O16797	RpL3	FALSE	0	0.131739	-0.0436044	0.307082	31.1683	1.82345	0.116391	0.261368	-5.37882	0.0953418	0.0722471
O16810	O16810	Orc1	FALSE	0	0.215	0.0361093	0.39389	28.1077	2.91689	0.0256999	0.110574	-3.84315	0.0403352	0.0737087
O18332	O18332	Rab1	TRUE	6	-0.245827	-0.762185	0.270532	24.6515	-1.15544	0.290425	0.45427	-6.21134	0.165708	0.212757
O18353	O18353	Chi	FALSE	0	0.0243944	-0.150239	0.199028	25.4544	0.339024	0.745763	0.832951	-6.84026	0.303843	0.0719546
O18373	O18373	Sps1	FALSE	0	0.0118327	-0.238823	0.262489	30.8314	0.114571	0.9124	0.940778	-6.89818	0.343176	0.103278
O18404	O18404	scu	FALSE	0	-0.276774	-0.515586	-0.0379613	28.1954	-2.81279	0.0295345	0.117222	-3.98892	0.0427602	0.0983985
O18405	O18405	Surf4	TRUE	6	0.714329	0.105947	1.32271	24.5856	2.84965	0.0281109	0.113927	-3.93721	0.0415582	0.250673
O18413	O18413	Rpt6	FALSE	0	-0.205074	-0.681214	0.271066	24.557	-1.04531	0.334852	0.495668	-6.32765	0.180809	0.196185
O18640	O18640	Rack1	FALSE	0	-0.40003	-0.56755	-0.232511	28.727	-5.79556	0.00102423	0.0249718	-0.395774	0.0091092	0.0690235
O44081	O44081	Nop60B	FALSE	0	0.215261	0.0200263	0.410495	32.0792	2.67594	0.0355316	0.13321	-4.1817	0.0485923	0.0804428
O44434	O44434	qkr58E-3	FALSE	0	-0.123995	-0.355694	0.107704	28.4773	-1.29882	0.240146	0.402251	-6.04901	0.146733	0.0954674
O44437	O44437	SmD3	FALSE	0	-0.0911656	-0.451836	0.269505	27.8089	-0.613463	0.561354	0.697605	-6.69576	0.254472	0.148608
O46048	O46048	east	FALSE	0	0.033831	-0.1428	0.210462	29.5273	0.464854	0.65789	0.769691	-6.78364	0.280767	0.0727778
O46050	O46050	Nmd3	TRUE	5	0.183056	-0.551011	0.917123	24.5514	0.605226	0.566475	0.699442	-6.7012	0.255142	0.302459
O46084	O46084	Pgam5	FALSE	0	-0.154266	-0.406258	0.0977267	27.5256	-1.48577	0.186248	0.34676	-5.82183	0.126491	0.103829
O46106	O46106	noi	FALSE	0	0.159809	-0.0185092	0.338128	27.9214	2.17508	0.0710255	0.198355	-4.89094	0.0723558	0.073473
O46307	O46307	CG11417	FALSE	0	-0.100718	-0.335392	0.133957	28.8753	-1.04162	0.336432	0.496884	-6.33141	0.181253	0.0966935
O61345	O61345	peng	FALSE	0	0.240874	0.0123359	0.469413	30.3454	2.558	0.041741	0.144401	-4.34863	0.0526746	0.0941652
O61360	O61360	crol	FALSE	0	-0.583678	-0.859996	-0.30736	31.0666	-5.12664	0.00195273	0.0319084	-1.0871	0.0116395	0.113852
O61380	O61380	eIF4G1	FALSE	0	-0.246025	-0.401906	-0.0901446	31.7462	-3.8305	0.00810495	0.0607278	-2.61657	0.0221523	0.0642279
O62530	O62530	AP-2mu	TRUE	3	0.223793	-0.209733	0.657318	24.6893	1.25285	0.255371	0.416401	-6.10229	0.151894	0.178626
O62619	O62619	PyK	FALSE	0	-0.357406	-0.761972	0.0471586	26.6523	-2.14409	0.0741783	0.203294	-4.93455	0.0741574	0.166694
O62621	O62621	beta'COP	FALSE	0	0.0935287	-0.21768	0.404737	27.6323	0.729394	0.492345	0.64034	-6.61243	0.233583	0.128228
O76268	O76268	NTPase	FALSE	0	0.0122239	-0.170181	0.194629	25.3399	0.162645	0.875962	0.917163	-6.89054	0.334562	0.0751567
O76521	O76521	Kap-alpha1	TRUE	4	0.115871	-0.210624	0.442367	24.7463	0.861328	0.421066	0.576432	-6.50312	0.210271	0.134527
O76742	O76742	Rab7	TRUE	4	-0.511175	-1.41343	0.39108	24.0163	-1.37502	0.216674	0.379056	-5.95833	0.138272	0.371758
O76857	O76857	BCL7-like	TRUE	7	0.981725	0.287945	1.67551	24.7732	3.43429	0.0131659	0.0791288	-3.13513	0.0288646	0.28586
O76863	O76863	eIF2Bbeta	TRUE	2	-0.487534	-0.889498	-0.0855698	25.2873	-2.94365	0.0248029	0.107619	-3.80582	0.0392573	0.165622
O76928	O76928	cm	TRUE	5	0.198893	-0.112894	0.510679	24.3929	1.54821	0.170881	0.326233	-5.74267	0.119003	0.128466
O76994	O76994	Ip259	FALSE	0	0.0478673	-0.164551	0.260286	28.8571	0.546909	0.603525	0.726406	-6.73784	0.264978	0.0875233
O77263	O77263	CG4045	TRUE	7	-0.371068	-0.985441	0.243306	24.6615	-1.46585	0.191413	0.35423	-5.84677	0.129216	0.253142
O77410	O77410	eIF3e	FALSE	0	0.258643	0.0757895	0.441496	29.2103	3.43294	0.0131881	0.0791288	-3.13692	0.0288646	0.0753414
O77430	O77430	SkpA	TRUE	2	-0.71423	-1.42883	0.000370746	25.7616	-2.42574	0.0500872	0.160279	-4.53621	0.0584665	0.294438
O77434	O77434	Sec22	TRUE	2	-0.922965	-1.93499	0.0890634	25.7731	-2.21341	0.0673145	0.193397	-4.83689	0.0705474	0.416988
O77459	O77459	ken	FALSE	0	-0.276033	-0.701694	0.149629	26.2126	-1.57386	0.164921	0.320528	-5.70975	0.116922	0.175386
O96433	O96433	CycT	TRUE	2	-0.0249851	-0.338074	0.288104	25.3941	-0.193679	0.852608	0.906535	-6.88422	0.330685	0.129003
O96689	O96689	vtd	FALSE	0	0.196927	-0.167131	0.560986	27.6833	1.31281	0.235673	0.397795	-6.03257	0.145107	0.150004
O97102	O97102	smt3	FALSE	0	-0.021419	-0.203952	0.161114	32.1775	-0.284791	0.785064	0.857792	-6.8594	0.312905	0.0752096
O97183	O97183	RpII33	FALSE	0	0.331939	0.075086	0.588792	30.1618	3.13648	0.0192577	0.0960551	-3.53892	0.0350389	0.105832
O97454	O97454	l(1)10Bb	TRUE	2	-0.514229	-0.78994	-0.238518	24.861	-4.52659	0.00366173	0.0426092	-1.76301	0.0155429	0.113602
P02283	P02283	His2B:CG17949	FALSE	0	0.418398	0.214605	0.622191	34.8799	4.98275	0.00226028	0.0340026	-1.24422	0.0124034	0.0839693
P02299	P02299	His3:CG31613	FALSE	0	0.224683	0.00119143	0.448174	34.868	2.43993	0.0491129	0.158816	-4.51607	0.0579327	0.0920857
P04052	P04052	RpII215	FALSE	0	-0.582039	-0.827439	-0.336638	32.5619	-5.75632	0.00106215	0.0254917	-0.434611	0.00929883	0.101113
P04359	P04359	RpL32	FALSE	0	0.288297	0.043801	0.532792	29.4525	2.86179	0.0276582	0.112987	-3.9202	0.0412152	0.10074
P05205	P05205	Su(var)205	FALSE	0	-0.830922	-1.11457	-0.547273	30.4198	-7.10963	0.000333543	0.0146378	0.79297	0.00533956	0.116873
P05552	P05552	Adf1	FALSE	0	-0.230996	-0.485917	0.0239246	28.067	-2.19922	0.0686644	0.194403	-4.85691	0.0709143	0.105036
P06603	P06603	alphaTub84B	FALSE	0	0.414743	0.175166	0.654319	33.9167	4.20149	0.00525922	0.0495593	-2.15232	0.0180782	0.0987133
P07664	P07664	Sry-delta	FALSE	0	-0.0844016	-0.254643	0.0858404	26.5345	-1.20324	0.272739	0.434572	-6.1585	0.158523	0.0701452
P08120	P08120	Col4a1	FALSE	0	-0.00416306	-0.564889	0.556563	30.6938	-0.018019	0.986189	0.988764	-6.90553	0.360681	0.231037
P08736	P08736	eEF1alpha1	FALSE	0	-0.132254	-0.294184	0.0296768	34.4201	-1.9822	0.0931165	0.231435	-5.16077	0.0844227	0.0667207
P09180	P09180	RpL4	FALSE	0	-0.157159	-0.35993	0.0456129	32.8395	-1.88105	0.107345	0.25138	-5.30024	0.0916983	0.0835485
P12297	P12297	su(w[a])	TRUE	2	0.298956	-0.353913	0.951824	25.2733	1.11135	0.307585	0.471037	-6.25884	0.171825	0.269003
P12982	P12982	Pp1-87B	FALSE	0	-0.389365	-0.696	-0.0827297	28.8894	-3.08179	0.0206795	0.0986574	-3.61422	0.0359882	0.126344
P13060	P13060	eEF2	FALSE	0	-0.0251419	-0.214072	0.163788	32.04	-0.322972	0.757315	0.84152	-6.84626	0.306969	0.0778453
P13395	P13395	alpha-Spec	FALSE	0	0.240841	-0.199768	0.681449	30.413	1.32662	0.231333	0.392251	-6.01626	0.143085	0.181545
P13468	P13468	fs(1)K10	TRUE	3	-0.298508	-0.628652	0.0316365	25.5082	-2.19442	0.0691268	0.195182	-4.86367	0.0711982	0.13603
P13709	P13709	fs(1)h	FALSE	0	0.212917	0.0415846	0.384249	30.1393	3.01606	0.022541	0.103527	-3.70516	0.0377646	0.0705943
P15348	P15348	Top2	FALSE	0	0.14391	-0.0632581	0.351079	33.5972	1.68592	0.14111	0.294491	-5.56333	0.107424	0.0853601
P15357	P15357	RpS27A	FALSE	0	0.0354155	-0.289784	0.360615	30.5358	0.264309	0.800096	0.870007	-6.86578	0.317361	0.133993
P17336	P17336	Cat	FALSE	0	-0.0274298	-0.554502	0.499642	26.9739	-0.126305	0.903481	0.935139	-6.89655	0.34112	0.217171
P17704	P17704	RpS17	FALSE	0	0.0536762	-0.228764	0.336117	28.7575	0.461237	0.660344	0.771322	-6.7855	0.281362	0.116375
P17886	P17886	crn	FALSE	0	0.47262	0.251044	0.694196	26.408	5.17676	0.00185692	0.0317427	-1.03308	0.0115791	0.0912964
P18289	P18289	Jra	FALSE	0	-0.0450295	-0.295084	0.205025	26.428	-0.43705	0.676865	0.781703	-6.79759	0.285149	0.103031
P19018	P19018	tra2	FALSE	0	-0.0541625	-0.316738	0.208413	26.9826	-0.500626	0.633881	0.753592	-6.76451	0.274895	0.10819
P20028	P20028	RpI135	FALSE	0	0.185652	0.00180339	0.369501	28.6028	2.4508	0.0483805	0.157829	-4.50065	0.0575727	0.0757516
P20193	P20193	Su(var)3-7	FALSE	0	-0.197923	-0.488926	0.0930806	27.2777	-1.65069	0.148217	0.303954	-5.60978	0.110876	0.119903
P20227	P20227	Tbp	FALSE	0	0.0448621	-0.367595	0.457319	29.2018	0.263979	0.800339	0.870007	-6.86588	0.317361	0.169946
P20240	P20240	Ote	FALSE	0	-0.176617	-0.386826	0.0335921	32.3411	-2.03915	0.0859527	0.220614	-5.08155	0.0804755	0.0866128
P21187	P21187	pAbp	FALSE	0	-0.0412007	-0.200361	0.11796	30.9683	-0.628257	0.552227	0.68961	-6.68582	0.251555	0.0655793
P22700	P22700	SERCA	FALSE	0	0.0782011	-0.188585	0.344987	26.6497	0.711407	0.502668	0.651559	-6.62616	0.237675	0.109925
P22813	P22813	Hsf	FALSE	0	-0.0877737	-0.429291	0.253744	27.5076	-0.623764	0.554989	0.691374	-6.68886	0.252199	0.140716
P23128	P23128	me31B	FALSE	0	-0.201887	-0.42857	0.0247961	28.0611	-2.16151	0.0723883	0.201064	-4.91004	0.073344	0.0934007
P23257	P23257	gammaTub23C	TRUE	2	0.165217	-0.556072	0.886507	25.0288	0.555923	0.597709	0.722898	-6.73239	0.263698	0.297194
P23572	P23572	Cdk1	TRUE	5	-0.696056	-1.19039	-0.201717	24.8129	-3.41734	0.0134492	0.0800694	-3.1578	0.0292077	0.203684
P24785	P24785	mle	FALSE	0	-0.158892	-0.39815	0.0803664	29.6197	-1.61177	0.156467	0.31212	-5.66066	0.113855	0.0985822
P25007	P25007	Cyp1	FALSE	0	-0.171475	-0.600932	0.257982	26.3045	-0.969056	0.368731	0.53031	-6.40341	0.193446	0.17695
P25167	P25167	RpIII128	TRUE	3	0.324013	-0.197604	0.845629	24.9891	1.50758	0.18074	0.338557	-5.79435	0.123499	0.214923
P25171	P25171	Rcc1	FALSE	0	-0.153124	-0.311058	0.00480927	30.5544	-2.35309	0.0553979	0.17121	-4.63924	0.0624537	0.0650738
P25439	P25439	brm	FALSE	0	-0.102765	-0.281865	0.0763343	30.9274	-1.39258	0.211565	0.375498	-5.93705	0.136974	0.0737947
P25991	P25991	su(f)	FALSE	0	0.204651	-0.417413	0.826714	26.2171	0.798449	0.454055	0.610361	-6.55705	0.222647	0.25631
P25992	P25992	yem	FALSE	0	-0.0289015	-0.323568	0.265766	25.6751	-0.238044	0.819508	0.885207	-6.87329	0.322905	0.121412
P26017	P26017	Pc	TRUE	1	-0.155859	-0.788095	0.476378	25.1361	-0.598302	0.570802	0.703297	-6.70572	0.256548	0.260502
P26019	P26019	DNApol-alpha180	FALSE	0	0.0333584	-0.254045	0.320762	27.1513	0.281696	0.787329	0.859515	-6.86039	0.313533	0.11842
P26802	P26802	Dbp73D	FALSE	0	-0.144283	-0.375062	0.0864968	28.8962	-1.51735	0.178322	0.335664	-5.78198	0.122443	0.0950886
P27864	P27864	Rrp1	FALSE	0	0.0458525	-0.322098	0.413803	30.0267	0.302443	0.77219	0.85146	-6.85352	0.310595	0.151607
P28166	P28166	zfh1	FALSE	0	0.0974569	-0.143905	0.338819	26.4301	0.97997	0.363722	0.526062	-6.39282	0.191896	0.0994489
P28668	P28668	GluProRS	FALSE	0	0.100876	-0.123852	0.325605	31.3522	1.08943	0.316423	0.478372	-6.28199	0.1745	0.0925954
P29327	P29327	RpS6	FALSE	0	0.0443936	-0.166694	0.255481	29.9612	0.51042	0.627389	0.748191	-6.75905	0.272925	0.0869748
P32234	P32234	128up	FALSE	0	-0.206056	-0.423879	0.0117675	27.494	-2.29588	0.0599905	0.180677	-4.72029	0.0659073	0.0897503
P34739	P34739	lds	FALSE	0	-0.0593849	-0.323222	0.204452	28.4211	-0.546272	0.603937	0.726406	-6.73822	0.264978	0.108709
P35381	P35381	blw	FALSE	0	0.080314	-0.262222	0.42285	25.9135	0.569054	0.589295	0.718949	-6.72432	0.262258	0.141136
P35600	P35600	Gnf1	FALSE	0	0.194302	0.0167965	0.371807	29.7357	2.65665	0.0364764	0.134234	-4.20897	0.0489659	0.0731379
P35875	P35875	Parp	FALSE	0	-0.0956253	-0.454473	0.263223	26.6873	-0.646742	0.540953	0.679398	-6.67311	0.24783	0.147857
P36241	P36241	RpL19	FALSE	0	0.319911	0.12219	0.517632	30.3012	3.92686	0.0072292	0.0569438	-2.49396	0.0207719	0.0814674
P38979	P38979	sta	FALSE	0	0.0479173	-0.236147	0.331982	28.1641	0.409397	0.695996	0.798099	-6.81066	0.29113	0.117044
P39413	P39413	Aef1	TRUE	4	0.282462	-0.607723	1.17265	25.0647	0.770102	0.469513	0.623596	-6.58028	0.227475	0.366785
P40796	P40796	La	FALSE	0	0.433385	-0.00318387	0.869954	26.2811	2.40929	0.0512408	0.16228	-4.55953	0.0591964	0.17988
P40797	P40797	pnut	FALSE	0	-0.0373125	-0.28808	0.213455	26.6521	-0.36112	0.729978	0.822631	-6.83154	0.300079	0.103324
P41073	P41073	Pep	FALSE	0	-0.318513	-0.523902	-0.113123	33.1937	-3.76372	0.00878078	0.0636193	-2.70237	0.023207	0.0846271
P41093	P41093	RpL18A	FALSE	0	0.108058	-0.05736	0.273477	31.1199	1.58542	0.162298	0.317567	-5.69483	0.115842	0.0681577
P41094	P41094	RpS18	FALSE	0	-0.356437	-0.632698	-0.0801769	28.0747	-3.13136	0.0193861	0.0960551	-3.54595	0.0350389	0.113828
P41375	P41375	eIF2beta	FALSE	0	-0.189865	-0.406681	0.0269512	25.6354	-2.12531	0.0761583	0.206677	-4.96094	0.0753914	0.0893352
P41900	P41900	TfIIFbeta	TRUE	6	0.137727	-0.0492536	0.324707	24.4445	1.78768	0.12238	0.268536	-5.42725	0.0979563	0.0770418
P42207	P42207	Sep1	FALSE	0	-0.286442	-0.771347	0.198463	26.9851	-1.43367	0.200038	0.363189	-5.8867	0.132484	0.199796
P45437	P45437	betaCOP	FALSE	0	0.00614753	-0.301342	0.313637	26.5902	0.0485221	0.962823	0.974531	-6.90436	0.355489	0.126696
P45594	P45594	tsr	FALSE	0	-0.0399752	-0.418629	0.338679	25.929	-0.256222	0.806057	0.874546	-6.86818	0.319016	0.156018
P45889	P45889	Arp1	FALSE	0	0.485935	0.137456	0.834413	27.1263	3.38431	0.0140205	0.0811977	-3.2021	0.0296192	0.143584
P45890	P45890	Arp6	FALSE	0	0.105998	-0.0762843	0.28828	25.6606	1.41131	0.206238	0.369766	-5.91419	0.134883	0.0751061
P45975	P45975	Su(var)3-9	TRUE	7	0.357703	-0.00373921	0.719146	24.2625	2.40189	0.0517695	0.163281	-4.57004	0.0595617	0.148926
P46863	P46863	Klp61F	FALSE	0	0.24175	0.0378845	0.445616	30.7181	2.878	0.0270657	0.112987	-3.89749	0.0412152	0.0839993
P48159	P48159	RpL23	FALSE	0	0.0198671	-0.1952	0.234934	28.9266	0.224197	0.829799	0.891807	-6.87694	0.325313	0.0886145
P48423	P48423	RasGAP1	FALSE	0	0.112208	-0.152324	0.37674	26.5056	1.02947	0.341676	0.502214	-6.34372	0.183197	0.108996
P48555	P48555	Rala	TRUE	6	-0.87054	-1.24815	-0.492926	24.6472	-5.59513	0.00123557	0.0271119	-0.596344	0.00988985	0.155589
P48588	P48588	RpS25	FALSE	0	-0.215785	-0.422877	-0.00869379	27.9567	-2.52888	0.0434438	0.147306	-4.3899	0.0537342	0.0853284
P48591	P48591	RnrL	FALSE	0	-0.205686	-0.66861	0.257239	27.8544	-1.07836	0.32097	0.481925	-6.29357	0.175796	0.19074
P48610	P48610	Argk	TRUE	2	-0.244553	-0.650615	0.16151	25.3789	-1.46167	0.192514	0.355839	-5.85198	0.129803	0.167311
P49028	P49028	mago	FALSE	0	-0.110424	-0.287447	0.0665986	26.8311	-1.51392	0.179166	0.336834	-5.78632	0.12287	0.0729391
P49846	P49846	Taf5	FALSE	0	0.362714	0.144766	0.580661	27.6684	4.03907	0.00633922	0.0542124	-2.35296	0.0197756	0.0898013
P49847	P49847	Taf6	FALSE	0	0.0464813	-0.106222	0.199185	27.2539	0.73875	0.487031	0.637206	-6.60517	0.23244	0.0629188
P50536	P50536	msl-3	FALSE	0	0.379212	0.188516	0.569908	27.2073	4.82625	0.00265845	0.0346049	-1.41864	0.0126232	0.0785728
P50887	P50887	RpL22	FALSE	0	0.143333	-0.0957887	0.382454	28.6946	1.45477	0.194342	0.356641	-5.86056	0.130095	0.0985258
P51406	P51406	bys	FALSE	0	0.0169005	-0.167631	0.201432	29.5715	0.222279	0.831227	0.891807	-6.87743	0.325313	0.0760328
P52172	P52172	srp	FALSE	0	-0.0837817	-0.315676	0.148113	29.2062	-0.876854	0.413197	0.571261	-6.4893	0.208384	0.095548
P52295	P52295	Pen	FALSE	0	0.941824	0.674387	1.20926	30.874	8.54705	0.000116746	0.0117274	1.87987	0.0042779	0.110193
P52304	P52304	polo	FALSE	0	0.010312	-0.208642	0.229266	27.7756	0.114304	0.912604	0.940778	-6.89821	0.343176	0.0902162
P52656	P52656	TfIIA-S	TRUE	3	-0.0130558	-0.502097	0.475985	24.7348	-0.0647926	0.950375	0.967379	-6.9033	0.35288	0.201501
P53034	P53034	RfC4	FALSE	0	0.0619766	-0.199177	0.323131	27.8247	0.57597	0.58489	0.71585	-6.71999	0.261127	0.107604
P54353	P54353	dod	FALSE	0	-0.170706	-0.506409	0.164997	25.8207	-1.23413	0.261808	0.421615	-6.12366	0.153796	0.13832
P54357	P54357	Mlc-c	FALSE	0	0.395398	0.147124	0.643671	27.8945	3.86521	0.00777669	0.0591336	-2.57225	0.0215707	0.102297
P54359	P54359	Sep2	FALSE	0	-0.144413	-0.335582	0.0467557	27.498	-1.8334	0.114775	0.25949	-5.36529	0.0946567	0.0787677
P54362	P54362	g	FALSE	0	-0.155552	-0.492155	0.181051	26.13	-1.12157	0.303534	0.467404	-6.24793	0.1705	0.138691
P54397	P54397	Fkbp39	FALSE	0	-0.272583	-0.456947	-0.0882188	33.9954	-3.58832	0.0108718	0.0716057	-2.93085	0.0261203	0.0759639
P54622	P54622	mtSSB	FALSE	0	-0.524099	-0.90891	-0.139288	29.0535	-3.30548	0.0154946	0.0855017	-3.30841	0.0311892	0.158555
P55162	P55162	Hem	FALSE	0	0.0249157	-0.218011	0.267842	28.5225	0.248924	0.811449	0.878974	-6.87027	0.320632	0.100094
P55828	P55828	RpS20	FALSE	0	-0.0929432	-0.271367	0.0854803	27.7048	-1.26425	0.251518	0.412747	-6.08917	0.150562	0.0735162
P55830	P55830	RpS3A	FALSE	0	0.15373	-0.0494818	0.356942	31.6841	1.83602	0.114354	0.25949	-5.36172	0.0946567	0.0837299
P55841	P55841	RpL14	FALSE	0	0.109151	-0.124054	0.342356	30.0895	1.13595	0.297909	0.461744	-6.23248	0.168435	0.096088
P55935	P55935	RpS9	FALSE	0	-0.0914501	-0.283054	0.100154	30.7182	-1.15837	0.289311	0.452989	-6.20813	0.165241	0.078947
P56175	P56175	Rtc1	FALSE	0	-0.293861	-0.542729	-0.044993	27.1149	-2.86577	0.0275113	0.112987	-3.91462	0.0412152	0.102542
P56538	P56538	eIF6	FALSE	0	0.135965	-0.065894	0.337824	26.401	1.63474	0.151548	0.30669	-5.6307	0.111874	0.0831723
P80455	P80455	RpS12	TRUE	2	-0.808063	-1.69831	0.0821878	25.3856	-2.20293	0.0683082	0.194403	-4.85167	0.0709143	0.366812
P91638	P91638	smid	FALSE	0	-0.147278	-0.467638	0.173082	27.2605	-1.11576	0.305831	0.469757	-6.25414	0.171358	0.131999
P91875	P91875	RpI1	FALSE	0	0.00523549	-0.238827	0.249298	29.6657	0.0520625	0.960113	0.974141	-6.90416	0.355347	0.100562
P91926	P91926	AP-2alpha	FALSE	0	0.123182	-0.050488	0.296851	26.4601	1.72144	0.134278	0.286346	-5.51615	0.104453	0.0715575
P91928	P91928	Mitofilin	FALSE	0	0.0868876	-0.219633	0.393408	27.1602	0.687966	0.516336	0.66312	-6.64363	0.241893	0.126296
P92177	P92177	14-3-3epsilon	FALSE	0	-0.0582455	-0.28259	0.166099	26.2467	-0.63011	0.55109	0.688751	-6.68456	0.251242	0.092437
P92204	P92204	Nelf-E	TRUE	4	0.907882	-0.0253259	1.84109	25.0563	2.36113	0.0547823	0.169991	-4.62784	0.0620093	0.384512
Q00963	Q00963	beta-Spec	FALSE	0	0.0234592	-0.333849	0.380768	30.0487	0.159345	0.878454	0.919059	-6.89115	0.335254	0.147223
Q02427	Q02427	Rbp1	FALSE	0	-0.14153	-0.361759	0.0787001	29.3057	-1.5597	0.168187	0.325769	-5.72795	0.118834	0.0907417
Q04688	Q04688	Ets97D	TRUE	1	0.559611	0.079954	1.03927	25.3743	2.83155	0.0288004	0.115502	-3.96258	0.0421329	0.197634
Q05344	Q05344	Ssrp	FALSE	0	0.0676661	-0.114354	0.249687	29.6744	0.902236	0.400571	0.560362	-6.46631	0.204408	0.0749983
Q05856	Q05856	SmB	FALSE	0	0.950346	0.530587	1.3701	32.5471	5.49478	0.00135969	0.0285447	-0.698838	0.0104125	0.172954
Q07886	Q07886	Dbp45A	FALSE	0	0.0382423	-0.322098	0.398582	25.9343	0.257573	0.80506	0.874521	-6.86778	0.319007	0.148472
Q0E8G6	Q0E8G6	Cpsf5	FALSE	0	-0.351452	-0.5716	-0.131304	27.7913	-3.87454	0.00769095	0.0590105	-2.56036	0.0215258	0.090708
Q0E8J0	Q0E8J0	MEP-1	FALSE	0	0.078655	-0.113712	0.271022	27.6535	0.992348	0.358106	0.520389	-6.38071	0.189827	0.0792614
Q0E8X6	Q0E8X6	eIF2Bdelta	FALSE	0	-0.247853	-0.442581	-0.0531246	27.4529	-3.08911	0.0204828	0.0986258	-3.60412	0.0359766	0.0802343
Q0E931	Q0E931	Dgp-1	FALSE	0	-0.0784648	-0.325873	0.168943	26.5517	-0.769715	0.469727	0.623596	-6.5806	0.227475	0.10194
Q0E965	Q0E965	SRPK	FALSE	0	-0.469244	-0.628068	-0.310421	27.6726	-7.17055	0.000317935	0.0146378	0.843214	0.00533956	0.0654405
Q0E9B6	Q0E9B6	RpS11	FALSE	0	0.0536891	-0.246157	0.353535	30.437	0.434567	0.678572	0.782868	-6.7988	0.285574	0.123546
Q0KHR5	Q0KHR5	RhoGAP15B	FALSE	0	-0.314891	-0.684897	0.0551148	27.1192	-2.06548	0.0828316	0.218287	-5.04479	0.0796267	0.152454
Q0KI68	Q0KI68	nsl1	FALSE	0	-0.116249	-0.323585	0.091087	28.1803	-1.36077	0.220902	0.381671	-5.97551	0.139226	0.0854292
Q1LZ24	Q1LZ24	CG1603	FALSE	0	-0.112287	-0.387513	0.162939	26.3675	-0.990171	0.35909	0.521325	-6.38285	0.190168	0.113402
Q23978	Q23978	Myo31DF	FALSE	0	0.0050265	-0.181134	0.191187	28.7651	0.065531	0.94981	0.967379	-6.90325	0.35288	0.0767041
Q24090	Q24090	Snr1	FALSE	0	-0.0112538	-0.304605	0.282098	27.5669	-0.0931066	0.92875	0.950407	-6.90073	0.346689	0.12087
Q24113	Q24113	nonA-l	TRUE	2	-0.232209	-1.25088	0.786466	25.4149	-0.553238	0.599438	0.723281	-6.73402	0.263838	0.419727
Q24154	Q24154	RpL29	TRUE	5	0.0346477	-0.417955	0.48725	24.6523	0.185791	0.858529	0.908067	-6.88593	0.331244	0.186487
Q24168	Q24168	Orc2	FALSE	0	0.0323319	-0.15882	0.223484	26.8894	0.410507	0.695223	0.798099	-6.81015	0.29113	0.0787608
Q24169	Q24169	Orc5	FALSE	0	0.165823	-0.0216733	0.353319	26.1021	2.14645	0.0739331	0.203151	-4.93123	0.0741051	0.0772544
Q24253	Q24253	AP-1-2beta	TRUE	4	0.189027	-0.403149	0.781203	24.9534	0.774714	0.466973	0.622091	-6.57655	0.226926	0.243996
Q24317	Q24317	DNApol-alpha50	TRUE	3	0.161899	-0.303412	0.627209	24.2904	0.844441	0.429748	0.584569	-6.51792	0.213239	0.191723
Q24318	Q24318	Dp	FALSE	0	-0.0803087	-0.294468	0.133851	27.1734	-0.910111	0.396713	0.556994	-6.45907	0.20318	0.0882406
Q24319	Q24319	Ost48	FALSE	0	-0.112607	-0.316954	0.0917399	28.4952	-1.33741	0.227989	0.389708	-6.00344	0.142158	0.0841975
Q24368	Q24368	Iswi	FALSE	0	0.292115	0.112849	0.471382	30.9873	3.9548	0.00699532	0.0559626	-2.45867	0.020414	0.0738636
Q24472	Q24472	Rbf	TRUE	4	0.734974	0.39199	1.07796	24.5061	5.20077	0.00181293	0.0317427	-1.00735	0.0115791	0.14132
Q24478	Q24478	Cp190	FALSE	0	-0.0780741	-0.279293	0.123145	29.1932	-0.941686	0.381528	0.541481	-6.42958	0.197521	0.0829089
Q24491	Q24491	Rsf1	FALSE	0	-0.515359	-0.849217	-0.181502	26.3095	-3.74643	0.00896569	0.063756	-2.72469	0.0232569	0.13756
Q24492	Q24492	RpA-70	FALSE	0	0.0424484	-0.417932	0.502829	26.6619	0.223776	0.830113	0.891807	-6.87705	0.325313	0.189692
Q24560	Q24560	betaTub56D	FALSE	0	-0.0297568	-0.240668	0.181155	32.6371	-0.342417	0.74333	0.832183	-6.83895	0.303563	0.0869024
Q24572	Q24572	Caf1-55	FALSE	0	-0.0513442	-0.220681	0.117993	30.3993	-0.735883	0.488655	0.637702	-6.6074	0.23262	0.0697722
Q24595	Q24595	Xpc	FALSE	0	0.116666	-0.170286	0.403619	25.5213	0.986742	0.360641	0.522097	-6.38621	0.19045	0.118234
Q27237	Q27237	CG5504	FALSE	0	-0.202307	-0.395438	-0.00917685	27.3656	-2.54232	0.0426491	0.146226	-4.37085	0.0533401	0.079576
Q27268	Q27268	Hel25E	FALSE	0	0.253652	0.0632965	0.444007	30.0343	3.23401	0.0169781	0.0902366	-3.40547	0.0329165	0.0784326
Q27272	Q27272	e(y)1	TRUE	3	0.582628	0.411255	0.754001	25.0111	8.25121	0.000143048	0.0122068	1.67198	0.00445277	0.0706112
Q27294	Q27294	caz	FALSE	0	0.222581	-0.182563	0.627725	29.546	1.33336	0.229239	0.390368	-6.00826	0.142398	0.166932
Q27333	Q27333	Alg3	TRUE	7	0.499466	0.21124	0.787693	24.6206	4.20573	0.00523388	0.0495593	-2.14713	0.0180782	0.118758
Q29QQ9	Q29QQ9	Rrp42	TRUE	7	-0.08768	-0.389581	0.214221	24.3413	-0.704862	0.50646	0.654817	-6.63109	0.238864	0.124393
Q29R10	Q29R10	CG7987	FALSE	0	-0.0736274	-0.334484	0.187229	24.9934	-0.685025	0.518068	0.664789	-6.64578	0.242501	0.107481
Q2PDY2	Q2PDY2	Trl	FALSE	0	-0.108933	-0.305598	0.0877311	29.539	-1.34432	0.225871	0.38764	-5.9952	0.141403	0.081032
Q3YMU0	Q3YMU0	ERp60	FALSE	0	-0.286755	-0.512321	-0.0611888	26.8624	-3.08536	0.0205834	0.0986574	-3.6093	0.0359882	0.0929405
Q4AB54	Q4AB54	His1:CG33861	FALSE	0	-0.188341	-0.355716	-0.020966	32.4899	-2.73101	0.0329756	0.126944	-4.104	0.0463064	0.068964
Q4AB57	Q4AB57	His2A:CG33859	FALSE	0	0.231415	-0.129054	0.591884	31.4095	1.55809	0.168562	0.326084	-5.73002	0.118949	0.148525
Q4V5A5	Q4V5A5	CG8388	TRUE	5	-0.380673	-1.02322	0.26187	24.181	-1.43787	0.198893	0.361984	-5.88152	0.132044	0.264748
Q4V6X9	Q4V6X9	CG17385	TRUE	6	-0.480612	-0.700047	-0.261176	24.5283	-5.31565	0.00161806	0.0310667	-0.885319	0.0113325	0.0904144
Q53YG3	Q53YG3	Myb	FALSE	0	0.138873	-0.0845625	0.362308	28.5616	1.50846	0.18052	0.338557	-5.79324	0.123499	0.0920625
Q53YH3	Q53YH3	Calr	FALSE	0	-0.140719	-0.453247	0.17181	26.3101	-1.09278	0.315062	0.477724	-6.27848	0.174264	0.128772
Q53ZT0	Q53ZT0	DnaJ-1	FALSE	0	-0.00899031	-0.22238	0.204399	28.2919	-0.102252	0.921779	0.947693	-6.89971	0.345699	0.0879234
Q59DT6	Q59DT6	Rb97D	FALSE	0	0.206917	-0.102637	0.516472	27.7466	1.62229	0.154196	0.310819	-5.64696	0.11338	0.127547
Q59E33	Q59E33	scaf6	FALSE	0	0.150395	-0.158937	0.459727	25.9942	1.17999	0.281224	0.443036	-6.18437	0.16161	0.127455
Q59E36	Q59E36	CoRest	FALSE	0	0.00364572	-0.199487	0.206778	25.287	0.0435584	0.966623	0.977441	-6.90462	0.35655	0.0836973
Q59E58	Q59E58	zip	FALSE	0	0.371169	-0.120343	0.862681	30.7934	1.83276	0.114878	0.25949	-5.36616	0.0946567	0.202519
Q5BI50	Q5BI50	Cul4	FALSE	0	0.170076	-0.069945	0.410096	27.9844	1.71974	0.134597	0.286346	-5.51841	0.104453	0.0988962
Q5EAK6	Q5EAK6	tefu	TRUE	4	-2.20374	-6.04812	1.64064	25.766	-1.39124	0.211951	0.375498	-5.93868	0.136974	1.58401
Q5LJZ2	Q5LJZ2	Set1	FALSE	0	-0.101922	-0.528193	0.324349	26.3789	-0.580298	0.582144	0.714767	-6.71727	0.260732	0.175637
Q5U0V7	Q5U0V7	Synj	FALSE	0	-0.543414	-0.816586	-0.270242	25.7613	-4.82795	0.00265371	0.0346049	-1.41672	0.0126232	0.112556
Q5U0X8	Q5U0X8	CG12325	FALSE	0	0.359016	0.0445179	0.673514	28.266	2.77054	0.0312615	0.121872	-4.04831	0.0444565	0.129583
Q6AWG9	Q6AWG9	CG5098	FALSE	0	-0.219112	-0.61237	0.174147	26.7586	-1.35225	0.223463	0.384367	-5.98573	0.140209	0.162035
Q6IGE3	Q6IGE3	Rpb12	TRUE	3	-0.474212	-1.63271	0.684287	25.4872	-0.993449	0.357611	0.520389	-6.37963	0.189827	0.477339
Q6NP69	Q6NP69	gfzf	FALSE	0	0.0751699	-0.106972	0.257312	30.0684	1.00162	0.353946	0.516129	-6.37157	0.188273	0.0750485
Q6NP72	Q6NP72	CG13220	TRUE	4	-0.595703	-0.842325	-0.34908	24.9138	-5.86227	0.00096325	0.0243634	-0.330224	0.00888726	0.101616
Q6NQY9	Q6NQY9	CG9143	FALSE	0	0.180682	-0.0163795	0.377743	28.9599	2.22527	0.0662071	0.190999	-4.82015	0.0696725	0.0811956
Q6NR46	Q6NR46	Spt-I	TRUE	1	-0.293571	-0.698727	0.111586	24.8181	-1.75857	0.127477	0.276962	-5.46646	0.10103	0.166938
Q709R6	Q709R6	bocks	FALSE	0	-0.454877	-0.749339	-0.160416	28.1357	-3.74916	0.00893624	0.063756	-2.72116	0.0232569	0.121328
Q76NQ0	Q76NQ0	CG33303	FALSE	0	-0.278115	-0.481882	-0.0743486	28.287	-3.31253	0.0153561	0.0854598	-3.29886	0.031174	0.0839585
Q7JNE1	Q7JNE1	prod	FALSE	0	-0.141027	-0.361468	0.0794149	30.217	-1.55266	0.169833	0.326233	-5.73698	0.119003	0.090829
Q7JQH9	Q7JQH9	whd	FALSE	0	0.0952851	-0.21358	0.40415	25.8339	0.748729	0.481408	0.633627	-6.59734	0.231134	0.127262
Q7JQN4	Q7JQN4	Rs1	FALSE	0	0.242307	0.079757	0.404856	30.9834	3.61783	0.0104845	0.0695862	-2.8921	0.0253836	0.0669757
Q7JQT9	Q7JQT9	CG1671	FALSE	0	0.0143104	-0.173256	0.201877	29.292	0.185168	0.858998	0.908067	-6.88606	0.331244	0.0772834
Q7JQY8	Q7JQY8	CG30020	FALSE	0	-0.327774	-0.507255	-0.148293	27.954	-4.43226	0.00406084	0.0451989	-1.87428	0.0164876	0.0739519
Q7JR58	Q7JR58	Echs1	FALSE	0	-0.214463	-0.467525	0.0385999	27.8628	-2.0568	0.0838473	0.218287	-5.05691	0.0796267	0.10427
Q7JRE4	Q7JRE4	MAN1	FALSE	0	-0.0474015	-0.273253	0.17845	27.4453	-0.509375	0.62808	0.748434	-6.75963	0.273013	0.0930582
Q7JRH2	Q7JRH2	ReepA	FALSE	0	0.891813	0.372302	1.41132	25.9653	4.16628	0.0054747	0.0507681	-2.19547	0.0185192	0.214055
Q7JRH5	Q7JRH5	CG5726	FALSE	0	-0.0823563	-0.390615	0.225902	27.9514	-0.648411	0.539941	0.678683	-6.67195	0.247569	0.127012
Q7JRJ1	Q7JRJ1	Eaf	TRUE	6	-0.120198	-0.3703	0.129904	24.5349	-1.1664	0.286284	0.449165	-6.19934	0.163846	0.10305
Q7JRJ9	Q7JRJ9	Incenp	FALSE	0	-0.264933	-0.527718	-0.00214904	28.4364	-2.44684	0.0486459	0.157829	-4.50626	0.0575727	0.108276
Q7JVL3	Q7JVL3	Prp38	FALSE	0	-0.0511529	-0.310219	0.207914	27.1526	-0.479212	0.648198	0.76447	-6.77612	0.278863	0.106744
Q7JVP4	Q7JVP4	Br140	FALSE	0	0.209389	-0.0374306	0.456209	27.2966	2.05894	0.0835962	0.218287	-5.05393	0.0796267	0.101698
Q7JVW5	Q7JVW5	CG8950	TRUE	6	-0.404925	-0.894878	0.0850288	24.2571	-2.0058	0.0900776	0.227246	-5.128	0.0828945	0.201877
Q7JVY0	Q7JVY0	coro	TRUE	2	-0.401331	-1.02046	0.217795	25.4269	-1.57323	0.165064	0.320528	-5.71055	0.116922	0.2551
Q7JW66	Q7JW66	CG12129	TRUE	5	-0.81748	-1.25058	-0.384376	24.906	-4.58093	0.0034519	0.0411017	-1.69954	0.014993	0.178453
Q7JWP6	Q7JWP6	HipHop	TRUE	3	0.132706	-0.175487	0.4409	24.5495	1.04505	0.334963	0.495668	-6.32792	0.180809	0.126986
Q7JX87	Q7JX87	Prx2540-2	TRUE	3	0.461459	0.0635506	0.859367	24.2272	2.81461	0.0294621	0.117222	-3.98635	0.0427602	0.163951
Q7JX95	Q7JX95	CG11123	TRUE	4	-0.195896	-0.62089	0.229099	24.5076	-1.11869	0.30467	0.468441	-6.25101	0.170878	0.175112
Q7JXC4	Q7JXC4	P32	TRUE	6	-0.946251	-1.41033	-0.48217	24.8854	-4.94859	0.0023411	0.0340026	-1.28198	0.0124034	0.191216
Q7JXF7	Q7JXF7	sel	TRUE	7	0.499574	0.204281	0.794866	24.5113	4.10597	0.00586701	0.0524747	-2.26983	0.0191417	0.12167
Q7JXU4	Q7JXU4	Ns2	FALSE	0	0.031077	-0.172156	0.23431	30.6046	0.371119	0.722881	0.819444	-6.82742	0.298916	0.0837386
Q7JZ53	Q7JZ53	CG4866	TRUE	3	-0.913744	-1.82587	-0.00161915	25.5713	-2.4313	0.0497028	0.159638	-4.52831	0.0582327	0.375825
Q7JZF5	Q7JZF5	Rpb5	FALSE	0	-0.344714	-0.539436	-0.149991	28.2129	-4.29647	0.0047237	0.0480354	-2.03688	0.0175223	0.0802319
Q7JZW2	Q7JZW2	RpS15	FALSE	0	-0.100756	-0.466243	0.264732	26.3612	-0.66906	0.527534	0.670008	-6.65735	0.244405	0.150593
Q7K012	Q7K012	Bap55	FALSE	0	0.274276	0.0363541	0.512198	30.8336	2.79784	0.0301337	0.118152	-4.00993	0.0430992	0.0980315
Q7K0B6	Q7K0B6	GstT1	FALSE	0	-0.674614	-1.00463	-0.344595	26.6773	-4.96119	0.00231093	0.0340026	-1.26804	0.0124034	0.135978
Q7K0D3	Q7K0D3	CG12909	FALSE	0	-0.309727	-0.529062	-0.090392	28.1369	-3.4272	0.0132835	0.0793909	-3.1446	0.0289601	0.0903731
Q7K0D8	Q7K0D8	Nup50	FALSE	0	0.0147677	-0.202967	0.232502	29.3919	0.164609	0.87448	0.916236	-6.89017	0.334224	0.0897137
Q7K0E6	Q7K0E6	AspRS	FALSE	0	-0.188753	-0.386852	0.00934687	29.1395	-2.31248	0.0586184	0.17759	-4.69678	0.064781	0.0816235
Q7K0F0	Q7K0F0	CG15084	TRUE	5	0.0440048	-0.274735	0.362745	24.5455	0.335068	0.748604	0.834819	-6.84176	0.304525	0.131331
Q7K0F7	Q7K0F7	CG11200	FALSE	0	0.0516068	-0.141365	0.244579	27.9602	0.649054	0.539552	0.678683	-6.6715	0.247569	0.0795108
Q7K0K1	Q7K0K1	CG2063	TRUE	1	0.143233	-0.47619	0.762656	25.4513	0.561209	0.594313	0.721355	-6.72916	0.263135	0.255222
Q7K0L8	Q7K0L8	FLASH	FALSE	0	-0.111979	-0.30815	0.0841915	28.3852	-1.38539	0.213644	0.377256	-5.94578	0.137615	0.0808288
Q7K0X3	Q7K0X3	Ctr9	FALSE	0	0.301314	0.109829	0.492798	29.1191	3.81903	0.00821686	0.0612675	-2.63126	0.0223491	0.078898
Q7K0Y1	Q7K0Y1	CG5033	FALSE	0	-0.0953653	-0.268789	0.0780589	30.778	-1.33459	0.228858	0.39015	-6.00679	0.142319	0.0714564
Q7K110	Q7K110	OstDelta	FALSE	0	0.184155	-0.0545451	0.422855	29.1584	1.8724	0.108657	0.252216	-5.31208	0.0920032	0.0983521
Q7K159	Q7K159	mip40	FALSE	0	0.0481041	-0.156005	0.252213	26.9485	0.571991	0.587422	0.717234	-6.72249	0.261632	0.0840995
Q7K180	Q7K180	Map60	FALSE	0	-0.419435	-0.712642	-0.126227	28.2516	-3.47183	0.0125615	0.0771913	-3.08504	0.0281578	0.120811
Q7K1Q7	Q7K1Q7	RpLP0-like	FALSE	0	0.100881	-0.106068	0.307831	26.2459	1.18308	0.280082	0.442014	-6.18094	0.161238	0.0852699
Q7K231	Q7K231	CG7747	TRUE	1	-0.286146	-0.669977	0.0976845	24.7001	-1.80933	0.11872	0.264836	-5.39797	0.0966065	0.158151
Q7K264	Q7K264	CG8569	FALSE	0	0.0764188	-0.12849	0.281327	26.5327	0.905126	0.399152	0.558885	-6.46366	0.20387	0.0844289
Q7K2B0	Q7K2B0	CG7137	FALSE	0	-0.22673	-0.382769	-0.0706907	30.1059	-3.5265	0.011735	0.0744833	-3.01244	0.02717	0.0642932
Q7K2D2	Q7K2D2	DCTN2-p50	FALSE	0	-0.314731	-0.682562	0.0530987	28.1126	-2.07664	0.0815429	0.216598	-5.02917	0.0790106	0.151558
Q7K2L1	Q7K2L1	Orc3	TRUE	1	0.635409	-0.116117	1.38693	25.8879	2.052	0.0844143	0.218652	-5.06361	0.0797596	0.309653
Q7K2X8	Q7K2X8	Nup44A	FALSE	0	-0.342128	-0.536774	-0.147483	29.5115	-4.26593	0.00488893	0.0480354	-2.07384	0.0175223	0.0802001
Q7K332	Q7K332	CG30159	TRUE	4	-0.230608	-0.57251	0.111294	24.4235	-1.63697	0.151077	0.30669	-5.62777	0.111874	0.140875
Q7K3D4	Q7K3D4	zda	TRUE	5	0.112597	-0.359119	0.584312	24.4134	0.579314	0.582768	0.714961	-6.71789	0.260803	0.194362
Q7K3D8	Q7K3D8	DMAP1	FALSE	0	0.211175	-0.146781	0.569131	27.0131	1.4318	0.20055	0.363261	-5.88901	0.13251	0.14749
Q7K3E9	Q7K3E9	CG7745	FALSE	0	0.348123	-0.0144604	0.710706	25.8557	2.3302	0.0571899	0.173948	-4.67168	0.0634526	0.149396
Q7K3J0	Q7K3J0	CCT8	FALSE	0	0.166043	-0.311928	0.644014	25.7918	0.843117	0.430434	0.584569	-6.51907	0.213239	0.19694
Q7K3M5	Q7K3M5	Dhx15	FALSE	0	-0.10681	-0.304794	0.0911753	30.3514	-1.30932	0.236782	0.398354	-6.03668	0.145311	0.0815762
Q7K3Q3	Q7K3Q3	CG10209	TRUE	4	0.844213	0.481259	1.20717	24.8902	5.64507	0.00117862	0.026237	-0.545852	0.00957072	0.149549
Q7K4B2	Q7K4B2	l(2)k09848	FALSE	0	-0.185064	-0.471277	0.101148	29.517	-1.56929	0.165967	0.321876	-5.71562	0.117414	0.117929
Q7K4G8	Q7K4G8	CG12391	TRUE	5	-0.720176	-1.11888	-0.321472	24.9106	-4.38386	0.00428434	0.0454719	-1.9319	0.0165872	0.164279
Q7K4L8	Q7K4L8	CG7878	FALSE	0	-0.15013	-0.354977	0.054717	29.105	-1.77872	0.123928	0.271214	-5.43934	0.0989332	0.0844036
Q7K5K3	Q7K5K3	Pdhb	FALSE	0	-0.35065	-0.693752	-0.0075488	25.6416	-2.48039	0.0464436	0.153744	-4.45867	0.0560828	0.141369
Q7K5M2	Q7K5M2	CG10139	FALSE	0	0.0262205	-0.304191	0.356632	29.7981	0.192599	0.853418	0.906535	-6.88445	0.330685	0.13614
Q7K7A9	Q7K7A9	Fen1	FALSE	0	0.119377	-0.239196	0.47795	25.7772	0.808	0.448928	0.605402	-6.54907	0.220838	0.147744
Q7KAH0	Q7KAH0	jim	FALSE	0	-0.092818	-0.302367	0.11673	28.7667	-1.07502	0.322349	0.483524	-6.29705	0.17638	0.0863408
Q7KHK9	Q7KHK9	Strica	FALSE	0	0.0164365	-0.17197	0.204843	27.1287	0.21173	0.839096	0.896281	-6.88004	0.326945	0.0776294
Q7KJA9	Q7KJA9	sxc	FALSE	0	0.756012	0.541368	0.970655	25.5811	8.54828	0.00011665	0.0117274	1.88072	0.0042779	0.0884402
Q7KK96	Q7KK96	SMC2	FALSE	0	0.265953	0.0573275	0.474579	28.1292	3.0939	0.0203552	0.0986258	-3.59752	0.0359766	0.0859605
Q7KKH3	Q7KKH3	Mys45A	FALSE	0	0.187282	-0.0605094	0.435073	26.8961	1.83433	0.114625	0.25949	-5.36402	0.0946567	0.102098
Q7KKI0	Q7KKI0	CCT5	FALSE	0	-0.0607858	-0.325214	0.203642	25.3503	-0.557908	0.596432	0.721923	-6.73118	0.263343	0.108953
Q7KLW9	Q7KLW9	Prp19	FALSE	0	0.0448596	-0.122847	0.212566	31.3318	0.649192	0.539469	0.678683	-6.67141	0.247569	0.0691006
Q7KLX3	Q7KLX3	Tapdelta	TRUE	4	-0.903687	-1.70288	-0.104493	25.2482	-2.74432	0.0323875	0.125308	-4.08523	0.0457097	0.329294
Q7KM04	Q7KM04	Eip63E	FALSE	0	-0.106521	-0.296932	0.08389	24.9239	-1.35773	0.221813	0.382385	-5.97916	0.139486	0.0784555
Q7KMI3	Q7KMI3	CG8878	FALSE	0	0.209316	0.00588328	0.412749	26.0853	2.49718	0.0453809	0.151204	-4.43485	0.0551562	0.0838209
Q7KMJ6	Q7KMJ6	nito	FALSE	0	-0.269621	-0.448754	-0.0904885	30.8457	-3.65298	0.0100429	0.0676577	-2.8461	0.0246801	0.0738085
Q7KMQ0	Q7KMQ0	Rpt1	TRUE	5	0.67591	-0.53196	1.88378	24.9842	1.35812	0.221695	0.382385	-5.97869	0.139486	0.497681
Q7KN62	Q7KN62	TER94	FALSE	0	0.53386	0.268323	0.799397	29.0522	4.87945	0.00251486	0.0346049	-1.35894	0.0126232	0.10941
Q7KN75	Q7KN75	Dp1	FALSE	0	-0.0870737	-0.323831	0.149683	30.5072	-0.892592	0.405334	0.564829	-6.47511	0.206038	0.0975515
Q7KN97	Q7KN97	PCB	TRUE	6	-1.92805	-2.53045	-1.32564	25.1089	-7.76775	0.000202143	0.0141132	1.31527	0.00514822	0.248212
Q7KND8	Q7KND8	Mad1	FALSE	0	0.219674	0.0265107	0.412838	27.5898	2.76009	0.0317054	0.12329	-4.06303	0.0449736	0.0795897
Q7KNS5	Q7KNS5	qkr54B	TRUE	1	-0.2924	-0.795324	0.210523	25.4374	-1.41106	0.206308	0.369766	-5.9145	0.134883	0.207221
Q7KQZ4	Q7KQZ4	lola	FALSE	0	-0.0152491	-0.21928	0.188781	28.8503	-0.181392	0.861836	0.90919	-6.88685	0.331654	0.0840671
Q7KRS9	Q7KRS9	CG1815	FALSE	0	0.285987	0.0977136	0.474259	26.7967	3.6866	0.00963975	0.0669985	-2.80227	0.0244397	0.0775745
Q7KRW8	Q7KRW8	CG1646	FALSE	0	-0.276524	-0.97873	0.425682	25.9971	-0.955734	0.374917	0.534754	-6.41622	0.195067	0.289331
Q7KSE8	Q7KSE8	osa	FALSE	0	-0.895533	-1.19248	-0.598587	30.918	-7.31937	0.000283206	0.0146378	0.964272	0.00533956	0.122351
Q7KSN8	Q7KSN8	CG31368	FALSE	0	0.386301	0.144915	0.627686	28.2535	3.88403	0.0076048	0.0589948	-2.54828	0.0215201	0.0994587
Q7KSQ0	Q7KSQ0	sea	TRUE	1	-0.370003	-1.00257	0.262561	24.8705	-1.41961	0.203915	0.367191	-5.90401	0.133944	0.260637
Q7KSZ0	Q7KSZ0	Alh	FALSE	0	-0.110136	-0.331719	0.111447	26.6676	-1.20632	0.271634	0.433261	-6.15506	0.158045	0.0912993
Q7KTL5	Q7KTL5	sip2	TRUE	2	-0.48415	-1.10111	0.132814	25.1179	-1.90453	0.10386	0.247715	-5.26802	0.0903615	0.254209
Q7KTT0	Q7KTT0	Xe7	TRUE	2	1.02546	0.0897707	1.96115	25.5057	2.65984	0.0363183	0.134098	-4.20446	0.0489164	0.385534
Q7KTV5	Q7KTV5	Nopp140	FALSE	0	-0.369084	-0.666528	-0.0716393	28.3134	-3.01153	0.0226756	0.10366	-3.71143	0.0378129	0.122557
Q7KU01	Q7KU01	PNUTS	FALSE	0	-0.0350659	-0.969945	0.899813	26.3229	-0.091033	0.930332	0.951392	-6.90095	0.347048	0.3852
Q7KUK4	Q7KUK4	CG3919	TRUE	2	0.210349	-0.371238	0.791936	24.9726	0.877799	0.412722	0.571118	-6.48846	0.208332	0.239633
Q7KUT2	Q7KUT2	Lon	FALSE	0	0.530412	-0.410308	1.47113	27.2812	1.36843	0.21862	0.380726	-5.96629	0.138881	0.387607
Q7KVB1	Q7KVB1	ABCB7	TRUE	7	1.36889	0.352694	2.38508	24.8387	3.26934	0.0162263	0.0879066	-3.35741	0.0320665	0.418704
Q7KVD1	Q7KVD1	trio	FALSE	0	-0.269217	-0.430655	-0.10778	26.1481	-4.04732	0.00627873	0.0542124	-2.34267	0.0197756	0.0665174
Q7KVP9	Q7KVP9	Xpd	TRUE	5	0.139901	-0.695744	0.975547	24.6846	0.406321	0.69814	0.798146	-6.81207	0.291147	0.344313
Q7KVQ0	Q7KVQ0	CG4038	FALSE	0	-0.68503	-0.896311	-0.47375	31.0755	-7.86899	0.000187745	0.0140805	1.39178	0.00513627	0.0870544
Q7KVS9	Q7KVS9	Trf4-1	FALSE	0	-0.222312	-0.398235	-0.0463881	25.6852	-3.06695	0.0210848	0.0996499	-3.63471	0.0363502	0.0724861
Q7KVW2	Q7KVW2	Pop1	FALSE	0	-0.187968	-0.359757	-0.0161794	26.279	-2.65557	0.0365299	0.134234	-4.21049	0.0489659	0.0707825
Q7KVX1	Q7KVX1	Pdha	TRUE	6	-0.0389219	-0.314706	0.236863	24.5843	-0.342525	0.743253	0.832183	-6.83891	0.303563	0.113632
Q7KY08	Q7KY08	AGO1	FALSE	0	0.386287	0.118645	0.653928	27.0163	3.50288	0.0120845	0.0754547	-3.04376	0.0275243	0.110277
Q7PL83	Q7PL83	Spf45	TRUE	3	-0.30726	-0.965547	0.351027	25.3521	-1.13282	0.299126	0.462855	-6.23586	0.16884	0.271236
Q7PLI2	Q7PLI2	Nipped-B	FALSE	0	0.0645568	-0.120049	0.249163	28.9278	0.848722	0.427535	0.583728	-6.51419	0.212932	0.0760636
Q7PLI7	Q7PLI7	CG17528	TRUE	1	-0.380813	-0.678378	-0.0832483	25.6335	-3.10598	0.020037	0.0977163	-3.58087	0.0356449	0.122606
Q7PLL6	Q7PLL6	l(3)80Fj	FALSE	0	0.222994	-0.18834	0.634327	28.105	1.31573	0.23475	0.39711	-6.02913	0.144857	0.169483
Q7PLS8	Q7PLS8	IntS3	FALSE	0	0.209073	0.0444174	0.373728	29.145	3.0817	0.0206821	0.0986574	-3.61435	0.0359882	0.0678433
Q7YU88	Q7YU88	CG14442	FALSE	0	-0.206747	-0.428944	0.0154508	26.571	-2.25823	0.0632263	0.186045	-4.77356	0.0678655	0.0915526
Q7YZ93	Q7YZ93	CG12236	TRUE	5	0.0776066	-0.346541	0.501754	24.3701	0.444069	0.672049	0.779552	-6.79414	0.284364	0.174762
Q7YZ99	Q7YZ99	Srrm234	FALSE	0	0.604773	0.405561	0.803986	29.8298	7.3679	0.000272834	0.0146378	1.00325	0.00533956	0.0820822
Q7YZA2	Q7YZA2	CG7065	FALSE	0	-0.036423	-0.276835	0.203989	29.2687	-0.367696	0.725308	0.820349	-6.82884	0.299246	0.0990575
Q7YZH1	Q7YZH1	rno	TRUE	1	-0.203268	-0.573604	0.167069	24.945	-1.33211	0.229626	0.390593	-6.00974	0.14248	0.152591
Q867Z4	Q867Z4	lola	FALSE	0	0.100984	-0.155204	0.357172	26.4783	0.956668	0.374481	0.534754	-6.41533	0.195067	0.105558
Q86B47	Q86B47	CG8611	FALSE	0	0.220324	-0.06765	0.508299	28.8712	1.85685	0.111057	0.254983	-5.33333	0.0930127	0.118655
Q86B87	Q86B87	mod(mdg4)	FALSE	0	-0.32911	-0.554749	-0.103471	31.278	-3.53994	0.0115411	0.0744833	-2.99466	0.02717	0.0929706
Q86BI3	Q86BI3	Zn72D	FALSE	0	-0.57661	-0.770425	-0.382796	28.9414	-7.22045	0.000305774	0.0146378	0.884066	0.00533956	0.079858
Q86BI8	Q86BI8	CG33051	TRUE	3	1.33992	1.03646	1.64339	25.4454	10.7162	3.10159e-05	0.00539248	3.19844	0.00196707	0.125038
Q86BP7	Q86BP7	CG15812	TRUE	7	-0.297237	-0.858224	0.26375	24.3133	-1.28594	0.244331	0.405283	-6.06405	0.147839	0.231145
Q86BS3	Q86BS3	Chro	FALSE	0	0.153119	-0.0303342	0.336572	30.0962	2.02569	0.0875946	0.223248	-5.10032	0.0814363	0.0755886
Q86CW5	Q86CW5	Hmr	FALSE	0	-0.210988	-0.484137	0.0621622	27.0241	-1.87467	0.108312	0.252216	-5.30898	0.0920032	0.112547
Q8I0Q7	Q8I0Q7	CG14995	FALSE	0	-0.626471	-0.886426	-0.366517	26.9273	-5.84888	0.000975156	0.0243634	-0.343338	0.00888726	0.10711
Q8I8U7	Q8I8U7	Nipped-A	FALSE	0	0.339556	0.183734	0.495377	28.4557	5.28873	0.00166151	0.031123	-0.913749	0.011353	0.0642037
Q8I937	Q8I937	CG32409	FALSE	0	0.0303873	-0.18126	0.242034	29.8968	0.348457	0.739008	0.829157	-6.8366	0.302459	0.0872053
Q8IH00	Q8IH00	Mat89Ba	FALSE	0	0.223281	0.0112528	0.43531	30.3164	2.5558	0.041867	0.144512	-4.35174	0.0527149	0.0873626
Q8IH18	Q8IH18	4E-T	TRUE	5	0.0355862	-0.436844	0.508016	24.438	0.182816	0.860766	0.908685	-6.88655	0.331469	0.194656
Q8IHB0	Q8IHB0	gish	FALSE	0	-0.177817	-0.384847	0.029213	26.4096	-2.08453	0.0806441	0.215425	-5.01813	0.0785826	0.0853031
Q8IMB7	Q8IMB7	Rad23	TRUE	6	-0.172093	-0.569893	0.225708	24.5688	-1.04994	0.332877	0.494486	-6.32292	0.180378	0.163907
Q8IMF5	Q8IMF5	Map205	FALSE	0	0.0739233	-0.138576	0.286423	31.1879	0.844292	0.429826	0.584569	-6.51805	0.213239	0.0875566
Q8IMI7	Q8IMI7	RpS7	FALSE	0	0.200661	-0.00795639	0.409279	30.7013	2.33443	0.0568542	0.173674	-4.66568	0.0633527	0.0859572
Q8IMK5	Q8IMK5	Gnpnat	FALSE	0	-0.662114	-1.01614	-0.308087	25.5337	-4.53905	0.00361237	0.0423557	-1.74841	0.0154505	0.145871
Q8IMP6	Q8IMP6	CG5815	TRUE	2	0.0886637	-0.624926	0.802253	25.5743	0.301555	0.772836	0.851561	-6.85383	0.310632	0.294022
Q8IMV6	Q8IMV6	Saf-B	FALSE	0	-0.360444	-0.62524	-0.0956483	31.058	-3.30366	0.0155306	0.0855017	-3.31087	0.0311892	0.109104
Q8IMX8	Q8IMX8	LSm3	TRUE	1	-1.57125	-2.71292	-0.429581	26.9916	-3.34021	0.0148253	0.0840285	-3.26148	0.0306519	0.470405
Q8IMZ9	Q8IMZ9	wfs1	FALSE	0	0.308408	-0.0654989	0.682314	25.1354	2.00185	0.0905799	0.227871	-5.1335	0.0831227	0.154062
Q8INM3	Q8INM3	sle	FALSE	0	-0.266502	-0.427177	-0.105828	32.7869	-4.02554	0.00643981	0.0542124	-2.36987	0.0197756	0.066203
Q8INR6	Q8INR6	gpp	TRUE	1	0.0858367	-0.40219	0.573864	24.9503	0.426872	0.683877	0.787432	-6.80249	0.287239	0.201083
Q8IP71	Q8IP71	Ing5	TRUE	1	0.207511	-0.155728	0.57075	24.8317	1.38649	0.213324	0.377256	-5.94445	0.137615	0.149666
Q8IPA8	Q8IPA8	CG33695	TRUE	3	-0.797615	-1.84891	0.253683	25.3942	-1.84135	0.113502	0.25828	-5.35447	0.0942151	0.433169
Q8IPE8	Q8IPE8	Mtpalpha	FALSE	0	0.185835	-0.118358	0.490029	28.2172	1.48268	0.18704	0.347518	-5.82571	0.126768	0.125338
Q8IPL4	Q8IPL4	l(2)05714	FALSE	0	-0.00429697	-0.220903	0.212309	27.6214	-0.048146	0.963111	0.974531	-6.90438	0.355489	0.0892487
Q8IPP4	Q8IPP4	cno	TRUE	6	-0.0464094	-0.252646	0.159827	24.5866	-0.546148	0.604017	0.726406	-6.73829	0.264978	0.084976
Q8IPX7	Q8IPX7	Rrp40	FALSE	0	-0.689475	-0.953945	-0.425005	25.5567	-6.32718	0.00063672	0.0199592	0.110493	0.00728072	0.10897
Q8IQ71	Q8IQ71	dikar	FALSE	0	-0.523286	-0.714	-0.332571	26.5361	-6.65923	0.000480419	0.0174689	0.408801	0.0063723	0.0785805
Q8IQB7	Q8IQB7	CG32032	FALSE	0	0.301661	-0.157289	0.760611	25.195	1.59523	0.160104	0.31493	-5.68214	0.11488	0.189102
Q8IQT4	Q8IQT4	CG14073	TRUE	7	0.154212	-0.196851	0.505275	24.3656	1.06611	0.326059	0.488494	-6.30629	0.178193	0.144649
Q8IQV9	Q8IQV9	Nup205	FALSE	0	0.287673	-0.138805	0.714151	31.5452	1.63708	0.151053	0.30669	-5.62762	0.111874	0.175723
Q8IQZ4	Q8IQZ4	CG32554	TRUE	5	0.15849	-0.0512423	0.368222	24.5107	1.83403	0.114675	0.25949	-5.36444	0.0946567	0.0864165
Q8IRC0	Q8IRC0	ens	FALSE	0	0.24512	-0.093685	0.583925	25.8538	1.75589	0.127956	0.277207	-5.47005	0.101119	0.139599
Q8IRG6	Q8IRG6	dre4	FALSE	0	0.125793	-0.0358479	0.287433	31.1768	1.88875	0.10619	0.250405	-5.28969	0.0913427	0.0666011
Q8IRJ8	Q8IRJ8	thoc7	FALSE	0	-0.368855	-0.836466	0.0987548	25.3897	-1.91444	0.102424	0.245818	-5.2544	0.0896695	0.192671
Q8IRW8	Q8IRW8	trr	FALSE	0	0.130997	-0.0542551	0.316249	27.0631	1.7162	0.135265	0.287369	-5.52313	0.104826	0.0763299
Q8MKK1	Q8MKK1	AIMP3	TRUE	1	-0.902789	-1.43977	-0.365812	25.9582	-4.08036	0.00604294	0.0536529	-2.30156	0.0195715	0.221252
Q8MLV1	Q8MLV1	LBR	FALSE	0	0.255175	0.0188939	0.491456	28.1344	2.62107	0.0382894	0.13614	-4.2593	0.0496612	0.0973555
Q8MLW2	Q8MLW2	dom	FALSE	0	0.185832	0.014062	0.357601	28.7624	2.62568	0.038049	0.13614	-4.25277	0.0496612	0.0707747
Q8MMD3	Q8MMD3	Eps-15	TRUE	1	-0.961283	-2.25042	0.327853	25.894	-1.80976	0.118648	0.264836	-5.39739	0.0966065	0.531165
Q8MQX9	Q8MQX9	Ankle2	TRUE	6	-0.573971	-1.53978	0.391833	24.7663	-1.44235	0.197677	0.361467	-5.87597	0.131856	0.397943
Q8MRW1	Q8MRW1	Tim23	TRUE	1	0.689869	-0.365091	1.74483	26.0693	1.58708	0.161924	0.317239	-5.69268	0.115722	0.434678
Q8MS38	Q8MS38	CG33217	FALSE	0	-0.261334	-0.474617	-0.0480512	28.4815	-2.97378	0.0238333	0.104925	-3.76387	0.0382746	0.0878795
Q8MSU4	Q8MSU4	Sym	FALSE	0	0.299589	0.142841	0.456336	27.4639	4.63867	0.00324363	0.0398577	-1.6326	0.0145393	0.0645851
Q8MSV2	Q8MSV2	shep	FALSE	0	0.122788	-0.125682	0.371257	26.4223	1.19936	0.274139	0.436122	-6.16284	0.159088	0.102377
Q8MSW0	Q8MSW0	IleRS	FALSE	0	-0.0141669	-0.209621	0.181287	31.1825	-0.175913	0.865959	0.911036	-6.88797	0.332327	0.0805334
Q8MSW9	Q8MSW9	U3-55K	FALSE	0	-0.0497343	-0.212505	0.113036	29.9286	-0.741565	0.485441	0.636209	-6.60297	0.232076	0.0670667
Q8MT06	Q8MT06	Ns1	FALSE	0	-0.0930901	-0.254181	0.0680012	30.9729	-1.40249	0.208731	0.37237	-5.92497	0.135833	0.0663748
Q8MT36	Q8MT36	NSD	TRUE	6	-0.4058	-0.880907	0.0693059	24.6957	-2.07296	0.0819659	0.216815	-5.03433	0.0790895	0.195759
Q8MT78	Q8MT78	CG5522	TRUE	7	-0.0629461	-0.676101	0.550208	24.5814	-0.249154	0.811279	0.878974	-6.87021	0.320632	0.252639
Q8MZI3	Q8MZI3	CG10077	FALSE	0	-0.159418	-0.334763	0.0159263	27.7064	-2.20655	0.0679631	0.194036	-4.84656	0.0707803	0.0722477
Q8ST83	Q8ST83	pho	FALSE	0	0.659326	0.403159	0.915493	26.5022	6.24663	0.00068292	0.0209793	0.0361016	0.00765281	0.105549
Q8STG9	Q8STG9	Sec61alpha	FALSE	0	0.188738	-0.12544	0.502916	29.0446	1.45798	0.19349	0.355946	-5.85657	0.129842	0.129452
Q8STI6	Q8STI6	CG1142	FALSE	0	-0.454474	-0.705763	-0.203185	27.8942	-4.38939	0.00425813	0.0454719	-1.9253	0.0165872	0.103539
Q8SWR8	Q8SWR8	Atx2	FALSE	0	-0.392819	-0.611755	-0.173884	29.2019	-4.35457	0.00442629	0.046567	-1.96695	0.0169867	0.0902085
Q8SWS7	Q8SWS7	vito	TRUE	1	-0.320686	-1.04007	0.398695	25.7995	-1.08191	0.319506	0.480534	-6.28987	0.175289	0.296408
Q8SWW4	Q8SWW4	CG16972	FALSE	0	0.0288539	-0.166514	0.224221	28.6413	0.358443	0.731883	0.82357	-6.83262	0.300421	0.0804977
Q8SWX8	Q8SWX8	CG5196	TRUE	5	0.0222227	-1.07656	1.12101	24.7886	0.0490854	0.962392	0.974531	-6.90433	0.355489	0.452736
Q8SX38	Q8SX38	CG13197	TRUE	1	0.226666	-0.289616	0.742948	24.9053	1.06553	0.326299	0.488494	-6.30688	0.178193	0.212725
Q8SXM8	Q8SXM8	LysRS	FALSE	0	-0.133016	-0.310887	0.0448543	28.4192	-1.81497	0.117784	0.263726	-5.39032	0.0962018	0.0732884
Q8SXU0	Q8SXU0	CG11555	FALSE	0	-0.602656	-0.86928	-0.336032	26.105	-5.48578	0.00137149	0.0285447	-0.708096	0.0104125	0.109858
Q8SXY6	Q8SXY6	bai	TRUE	3	-0.360224	-0.562255	-0.158193	24.5915	-4.32736	0.0045629	0.0473555	-1.99964	0.0172743	0.0832433
Q8SXZ6	Q8SXZ6	CG11906	TRUE	7	0.228199	-0.0138916	0.47029	24.3216	2.28773	0.0606762	0.182029	-4.73183	0.0664003	0.0997491
Q8SY39	Q8SY39	CG32344	FALSE	0	0.228813	0.0523418	0.405285	30.0969	3.14684	0.0190003	0.0956867	-3.52469	0.0349045	0.072712
Q8SY53	Q8SY53	Ostgamma	FALSE	0	0.169256	-0.0858676	0.424379	27.7711	1.61013	0.156823	0.312426	-5.66279	0.113966	0.105119
Q8SYL1	Q8SYL1	l(2)09851	TRUE	4	0.129378	-0.738049	0.996806	24.9519	0.36199	0.72936	0.822538	-6.83118	0.300045	0.357408
Q8SZ28	Q8SZ28	CG44250	FALSE	0	-0.566628	-1.07518	-0.0580768	26.7531	-2.70416	0.0341966	0.129694	-4.14187	0.0473096	0.209539
Q8SZY9	Q8SZY9	CG32075	FALSE	0	-0.20737	-0.429608	0.0148677	28.7004	-2.26463	0.062664	0.185255	-4.76452	0.0675771	0.0915691
Q8T007	Q8T007	CG6791	TRUE	5	0.346213	-0.00524047	0.697667	24.7288	2.39081	0.0525712	0.164794	-4.58576	0.0601136	0.14481
Q8T051	Q8T051	CG31365	FALSE	0	0.169877	0.00317851	0.336576	25.7776	2.47327	0.0469022	0.154265	-4.46877	0.0562727	0.0686852
Q8T060	Q8T060	AIMP2	FALSE	0	-0.664921	-0.908035	-0.421807	26.5197	-6.63788	0.000489038	0.0174689	0.39001	0.0063723	0.100171
Q8T076	Q8T076	Rcd1	FALSE	0	0.119084	-0.090122	0.32829	28.7963	1.38149	0.214779	0.377461	-5.95051	0.13769	0.0861995
Q8T0E7	Q8T0E7	CG10984	FALSE	0	0.222841	-0.0733904	0.519073	25.8408	1.82571	0.116021	0.261302	-5.37574	0.0953177	0.122057
Q8T4A9	Q8T4A9	Rrp45	FALSE	0	0.102447	-0.244638	0.449532	27.3518	0.716362	0.49981	0.64895	-6.62241	0.236724	0.14301
Q8T4F7	Q8T4F7	ena	FALSE	0	-0.24176	-0.556749	0.0732294	30.9456	-1.86276	0.110139	0.253531	-5.32526	0.0924827	0.129786
Q8T4G5	Q8T4G5	CG6512	FALSE	0	-0.120189	-0.426385	0.186007	27.726	-0.952648	0.376362	0.536263	-6.41917	0.195618	0.126163
Q8T6B9	Q8T6B9	hfp	FALSE	0	0.158896	-0.00551558	0.323308	27.6837	2.34557	0.0559797	0.172314	-4.64989	0.0628567	0.0677429
Q8T6I0	Q8T6I0	Past1	TRUE	2	-0.728594	-1.28567	-0.171514	24.6393	-3.17422	0.0183384	0.0935806	-3.48715	0.0341363	0.229535
Q94513	Q94513	BEAF-32	FALSE	0	0.0266413	-0.177011	0.230293	29.4335	0.317494	0.761274	0.843466	-6.84824	0.307679	0.0839111
Q94517	Q94517	HDAC1	FALSE	0	-0.03518	-0.290981	0.220621	29.3231	-0.333781	0.749528	0.834863	-6.84225	0.304541	0.105398
Q94522	Q94522	Scsalpha1	FALSE	0	-0.483116	-0.744535	-0.221698	29.9509	-4.48522	0.00383107	0.0434709	-1.81164	0.0158573	0.107713
Q94523	Q94523	SdhA	FALSE	0	0.583244	0.184668	0.98182	26.8319	3.55147	0.0113776	0.0737382	-2.97942	0.0268982	0.164226
Q94524	Q94524	Dlc90F	FALSE	0	-0.063809	-0.369923	0.242305	25.8983	-0.505904	0.630378	0.75059	-6.76158	0.2738	0.126129
Q94545	Q94545	ash2	FALSE	0	0.0753303	-0.209556	0.360216	26.1248	0.641752	0.543982	0.68153	-6.67658	0.248608	0.117382
Q94546	Q94546	Atu	FALSE	0	-0.255358	-0.638508	0.127793	25.3711	-1.61751	0.155222	0.311841	-5.65318	0.113753	0.15787
Q94883	Q94883	Dref	FALSE	0	0.00472335	-0.21588	0.225327	29.6882	0.0519645	0.960188	0.974141	-6.90416	0.355347	0.0908957
Q94901	Q94901	lark	FALSE	0	-0.132346	-0.32882	0.0641267	31.1021	-1.63485	0.151524	0.30669	-5.63055	0.111874	0.0809533
Q95029	Q95029	Cp1	TRUE	4	-0.485949	-0.882327	-0.0895717	24.9541	-2.97544	0.0237812	0.104925	-3.76157	0.0382746	0.16332
Q95RB1	Q95RB1	CG14641	FALSE	0	-0.133711	-0.395056	0.127634	29.0668	-1.24171	0.259185	0.420229	-6.11503	0.153291	0.107683
Q95RF6	Q95RF6	Tom20	TRUE	3	-0.10676	-0.358705	0.145184	25.2939	-1.02843	0.342129	0.5024	-6.34478	0.183265	0.103809
Q95RI7	Q95RI7	CG17454	FALSE	0	-0.192067	-0.368802	-0.0153325	26.2872	-2.63755	0.0374382	0.135554	-4.23599	0.0494473	0.0728204
Q95RJ9	Q95RJ9	ebi	FALSE	0	0.0263675	-0.260577	0.313312	27.0518	0.223018	0.830677	0.891807	-6.87724	0.325313	0.11823
Q95RQ8	Q95RQ8	pita	FALSE	0	-0.00875767	-0.19339	0.175875	29.2056	-0.11512	0.911983	0.940778	-6.8981	0.343176	0.0760744
Q95RV3	Q95RV3	Lhr	TRUE	2	-0.600048	-1.04698	-0.153121	24.7068	-3.2585	0.016453	0.088598	-3.37214	0.0323187	0.184148
Q95RY2	Q95RY2	CG7945	FALSE	0	-0.00987582	-0.251918	0.232167	26.5644	-0.0990261	0.924237	0.948315	-6.90008	0.345926	0.0997294
Q95T98	Q95T98	CG31523	TRUE	5	0.190237	-0.498545	0.879019	24.7419	0.670319	0.526784	0.670008	-6.65644	0.244405	0.2838
Q95TS5	Q95TS5	IntS9	FALSE	0	0.242054	-0.0383509	0.522459	25.7514	2.09506	0.0794614	0.213007	-5.00339	0.0777004	0.115536
Q95WY3	Q95WY3	Nop56	FALSE	0	0.103666	-0.0964829	0.303815	32.1011	1.25705	0.253947	0.414519	-6.09747	0.151208	0.0824678
Q960E4	Q960E4	CG8929	FALSE	0	0.0975986	-0.149207	0.344404	26.5123	0.959747	0.373045	0.533518	-6.41238	0.194616	0.101692
Q960E9	Q960E9	CG32452	TRUE	2	0.865478	0.611593	1.11936	24.9566	8.27346	0.000140849	0.0122068	1.68788	0.00445277	0.104609
Q960S0	Q960S0	BtbVII	FALSE	0	-0.12071	-0.350105	0.108685	27.0502	-1.27711	0.247234	0.407459	-6.07431	0.148633	0.094518
Q960V1	Q960V1	simj	TRUE	1	0.474904	0.00379267	0.946016	25.0056	2.44653	0.0486667	0.157829	-4.5067	0.0575727	0.194113
Q960W6	Q960W6	CG8306	FALSE	0	0.0623857	-0.246758	0.371529	25.3423	0.489772	0.641117	0.760429	-6.77045	0.277389	0.127377
Q960Y8	Q960Y8	alt	FALSE	0	0.0327122	-0.218033	0.283458	29.4093	0.316625	0.761902	0.843466	-6.84855	0.307679	0.103315
Q961C3	Q961C3	CG8478	FALSE	0	0.0345764	-0.161461	0.230614	27.9849	0.428064	0.683054	0.787075	-6.80193	0.287109	0.0807739
Q961D1	Q961D1	CycK	FALSE	0	0.13149	-0.145922	0.408902	29.0296	1.15037	0.292356	0.455897	-6.21686	0.166302	0.114303
Q99323	Q99323	zip	TRUE	5	0.484468	-0.861032	1.82997	24.9546	0.873877	0.414698	0.572464	-6.49197	0.208823	0.554389
Q9GNC8	Q9GNC8	ps	TRUE	6	0.0215454	-0.21594	0.259031	24.5245	0.220184	0.832788	0.892024	-6.87795	0.325392	0.0978518
Q9GU68	Q9GU68	eEF5	TRUE	6	0.769151	-0.240494	1.7788	24.3892	1.84889	0.112306	0.256318	-5.34419	0.0934995	0.416007
Q9GYU8	Q9GYU8	mbo	FALSE	0	0.0204876	-0.408593	0.449568	29.0853	0.115883	0.911402	0.940778	-6.898	0.343176	0.176795
Q9I7F7	Q9I7F7	Ack-like	FALSE	0	0.0581679	-0.245584	0.36192	25.8826	0.464765	0.65795	0.769691	-6.78368	0.280767	0.125156
Q9I7H8	Q9I7H8	CG18766	TRUE	3	-0.680281	-0.912125	-0.448438	24.8998	-7.12134	0.000330474	0.0146378	0.802664	0.00533956	0.0955271
Q9I7I8	Q9I7I8	CG42668	FALSE	0	-0.11129	-0.319725	0.0971438	28.3161	-1.29586	0.241103	0.402278	-6.05247	0.146743	0.0858816
Q9I7K0	Q9I7K0	Jupiter	FALSE	0	0.154979	-0.148442	0.4584	26.1661	1.23964	0.259899	0.420229	-6.11739	0.153291	0.125019
Q9I7S8	Q9I7S8	Paics	FALSE	0	-0.24584	-0.408807	-0.0828734	29.8131	-3.66119	0.00994285	0.0674382	-2.83538	0.0246001	0.0671477
Q9I7T7	Q9I7T7	Larp4B	FALSE	0	-0.454137	-0.748877	-0.159396	26.9642	-3.73952	0.00904087	0.0639944	-2.73363	0.0233438	0.121443
Q9I7W5	Q9I7W5	Sas10	FALSE	0	-0.275257	-0.507234	-0.0432803	31.1518	-2.8798	0.0270008	0.112987	-3.89498	0.0412152	0.0955819
Q9I7Z8	Q9I7Z8	CG18273	FALSE	0	0.282492	0.0939796	0.471005	29.4103	3.63693	0.010242	0.0686975	-2.86708	0.0250594	0.0776733
Q9N693	Q9N693	sbb	TRUE	4	-0.0703221	-0.647239	0.506595	24.6571	-0.295834	0.777001	0.853701	-6.85576	0.311413	0.237708
Q9NBD7	Q9NBD7	chb	FALSE	0	0.0934959	-0.212445	0.399437	28.6951	0.741693	0.485369	0.636209	-6.60287	0.232076	0.126057
Q9NCC3	Q9NCC3	SH3PX1	TRUE	4	-0.40722	-0.733713	-0.0807275	24.8817	-3.02708	0.0222165	0.103134	-3.68987	0.0376211	0.134525
Q9NG60	Q9NG60	eIF2D	TRUE	5	-0.0911804	-0.852732	0.670372	24.7138	-0.290583	0.780831	0.856072	-6.85751	0.312277	0.313784
Q9NKV0	Q9NKV0	Mlf	TRUE	6	-0.214432	-0.952065	0.5232	24.6074	-0.705536	0.506069	0.654817	-6.63058	0.238864	0.303928
Q9TVQ5	Q9TVQ5	spt4	TRUE	5	-0.1321	-1.5564	1.2922	25.1765	-0.225098	0.829129	0.891807	-6.87671	0.325313	0.586856
Q9TW12	Q9TW12	DIP1	TRUE	1	-0.211892	-0.479587	0.0558037	25.1151	-1.92106	0.101475	0.244302	-5.24528	0.0891165	0.110299
Q9U1H9	Q9U1H9	sbr	FALSE	0	0.0509694	-0.158697	0.260636	27.7369	0.589997	0.576018	0.708945	-6.71109	0.258608	0.0863893
Q9U405	Q9U405	grau	FALSE	0	0.392727	0.0860805	0.699374	26.7109	3.10829	0.0199769	0.0977163	-3.5777	0.0356449	0.126348
Q9U5L1	Q9U5L1	SrpRalpha	FALSE	0	-0.156547	-0.431199	0.118106	28.7275	-1.38334	0.214239	0.377256	-5.94827	0.137615	0.113166
Q9U9Q1	Q9U9Q1	RfC38	FALSE	0	0.0343245	-0.146818	0.215467	27.9556	0.459889	0.661259	0.771544	-6.78619	0.281443	0.0746365
Q9U9Q2	Q9U9Q2	Neos	FALSE	0	-0.0249915	-0.290456	0.240473	26.6444	-0.228484	0.826609	0.890373	-6.87583	0.32479	0.10938
Q9U9Q4	Q9U9Q4	eIF3h	FALSE	0	-0.0702289	-0.352553	0.212095	26.3728	-0.603721	0.567414	0.700038	-6.70218	0.25536	0.116327
Q9V3A7	Q9V3A7	glu	FALSE	0	0.237173	0.000781267	0.473564	28.1423	2.43502	0.0494481	0.159564	-4.52304	0.0582055	0.0974009
Q9V3C0	Q9V3C0	abs	FALSE	0	-0.0251842	-0.233675	0.183307	30.3537	-0.293163	0.778949	0.855229	-6.85665	0.31197	0.0859051
Q9V3D6	Q9V3D6	Cpsf100	FALSE	0	0.00156765	-0.253403	0.256539	27.1644	0.014922	0.988562	0.990497	-6.90558	0.361313	0.105056
Q9V3E7	Q9V3E7	Ref1	FALSE	0	0.651695	0.350867	0.952524	32.0062	5.25768	0.00171326	0.0313438	-0.946655	0.0114336	0.123951
Q9V3F2	Q9V3F2	lace	FALSE	0	0.238686	0.0513145	0.426057	26.7039	3.09166	0.0204147	0.0986258	-3.6006	0.0359766	0.0772029
Q9V3F3	Q9V3F3	mTTF	FALSE	0	-0.459326	-0.697887	-0.220764	26.445	-4.67293	0.00312672	0.0390458	-1.59312	0.0142431	0.098295
Q9V3G1	Q9V3G1	RpL8	FALSE	0	-0.217203	-0.409718	-0.0246868	29.8242	-2.73821	0.0326558	0.126028	-4.09384	0.0459726	0.0793227
Q9V3G3	Q9V3G3	cyp33	FALSE	0	-0.118009	-0.351682	0.115665	25.9971	-1.22567	0.264765	0.424508	-6.13326	0.154852	0.096281
Q9V3H9	Q9V3H9	Nab2	FALSE	0	0.269899	0.0421472	0.49765	27.9961	2.87613	0.0271335	0.112987	-3.90012	0.0412152	0.0938409
Q9V3J4	Q9V3J4	Sec13	FALSE	0	0.0218907	-0.200427	0.244209	28.2981	0.238975	0.818817	0.885083	-6.87304	0.32286	0.0916022
Q9V3L6	Q9V3L6	Cbp20	FALSE	0	-0.522864	-0.865863	-0.179865	26.4321	-3.69968	0.00948778	0.066242	-2.78527	0.0241637	0.141327
Q9V3P2	Q9V3P2	l(2)34Fd	FALSE	0	0.273956	0.0619148	0.485998	28.6438	3.13566	0.0192781	0.0960551	-3.54005	0.0350389	0.0873679
Q9V3P3	Q9V3P3	REG	FALSE	0	-0.426343	-0.68587	-0.166816	29.2555	-3.98699	0.00673619	0.0552173	-2.41817	0.0201421	0.106934
Q9V3Q4	Q9V3Q4	Jafrac2	TRUE	1	-0.265939	-1.21429	0.682407	26.6968	-0.680588	0.520687	0.667025	-6.64902	0.243317	0.390749
Q9V3T8	Q9V3T8	SC35	TRUE	1	-0.348825	-0.774285	0.0766346	25.5972	-1.98984	0.092122	0.230455	-5.15017	0.0840652	0.175303
Q9V3V3	Q9V3V3	Pez	TRUE	7	0.104596	-0.135818	0.345011	24.5921	1.0559	0.330349	0.492612	-6.31681	0.179695	0.0990585
Q9V3W7	Q9V3W7	SF2	FALSE	0	0.670571	0.434509	0.906632	33.0965	6.89427	0.00039618	0.016014	0.612122	0.00584158	0.097265
Q9V3Y5	Q9V3Y5	CG4119	FALSE	0	0.110746	-0.0659363	0.287428	30.2415	1.52126	0.177362	0.334268	-5.77702	0.121934	0.0727988
Q9V405	Q9V405	Rpt3	FALSE	0	0.991785	0.525846	1.45772	25.6545	5.16604	0.00187697	0.0317427	-1.04461	0.0115791	0.191982
Q9V406	Q9V406	crp	FALSE	0	0.147692	-0.0517287	0.347113	29.6585	1.79744	0.120716	0.267018	-5.41406	0.0974027	0.0821678
Q9V414	Q9V414	Smg5	TRUE	2	-0.133963	-0.624344	0.356419	24.7678	-0.663007	0.531152	0.672034	-6.66167	0.245144	0.202053
Q9V426	Q9V426	vig	TRUE	3	-0.310935	-0.677062	0.0551927	24.9855	-2.06113	0.0833388	0.218287	-5.05086	0.0796267	0.150856
Q9V431	Q9V431	cass	FALSE	0	-0.274587	-0.519553	-0.0296204	28.9457	-2.72046	0.0334497	0.127763	-4.11887	0.0466051	0.100934
Q9V455	Q9V455	Kap-alpha3	FALSE	0	0.12085	-0.049676	0.291376	28.5509	1.71998	0.134551	0.286346	-5.51808	0.104453	0.0702621
Q9V460	Q9V460	Spt5	FALSE	0	-0.129004	-0.324465	0.0664577	30.9518	-1.60181	0.158648	0.314025	-5.67361	0.11455	0.0805364
Q9V463	Q9V463	Nup154	FALSE	0	0.24211	-0.155097	0.639318	30.6569	1.47933	0.187903	0.348574	-5.82991	0.127152	0.163662
Q9V466	Q9V466	Nup107	FALSE	0	0.266939	-0.0799826	0.61386	30.47	1.86745	0.109416	0.253107	-5.31885	0.0923281	0.142943
Q9V468	Q9V468	CG9776	FALSE	0	0.594063	0.386387	0.801738	30.5645	6.9425	0.000381058	0.0158191	0.653073	0.00577047	0.085569
Q9V474	Q9V474	dbr	FALSE	0	0.227439	0.0439651	0.410913	26.5105	3.00857	0.0227644	0.103757	-3.71555	0.0378484	0.0755971
Q9V492	Q9V492	CG11077	FALSE	0	0.143785	-0.037169	0.324739	26.0689	1.92848	0.100423	0.24253	-5.23507	0.08847	0.0745589
Q9V493	Q9V493	CG11076	FALSE	0	-0.875816	-1.10052	-0.651115	27.9511	-9.45972	6.46868e-05	0.00892539	2.47594	0.0032558	0.0925837
Q9V4C8	Q9V4C8	Hcf	FALSE	0	0.0635477	-0.109768	0.236864	29.9202	0.889877	0.406682	0.565819	-6.47757	0.206399	0.0714118
Q9V4D4	Q9V4D4	bip2	FALSE	0	0.369505	0.0331941	0.705816	27.0441	2.66654	0.0359888	0.133847	-4.19499	0.0488247	0.138571
Q9V4F9	Q9V4F9	MED26	TRUE	1	0.204535	-0.00438625	0.413456	24.4881	2.37604	0.0536595	0.167863	-4.6067	0.0612331	0.0860822
Q9V4P1	Q9V4P1	scra	FALSE	0	-0.108643	-0.413149	0.195862	29.2837	-0.865917	0.418729	0.575004	-6.49905	0.20975	0.125466
Q9V4Q8	Q9V4Q8	U2A	FALSE	0	1.11593	0.752859	1.479	30.8634	7.45957	0.000254409	0.0146378	1.07621	0.00533956	0.149597
Q9V4W1	Q9V4W1	Gle1	TRUE	2	0.121891	-0.301076	0.544857	24.6419	0.699411	0.509632	0.657811	-6.63516	0.239956	0.174276
Q9V535	Q9V535	tsu	FALSE	0	-0.0808167	-0.592995	0.431362	27.0848	-0.382956	0.71452	0.813567	-6.8224	0.296773	0.211034
Q9V597	Q9V597	RpL31	FALSE	0	0.0295763	-0.167106	0.226258	27.3783	0.364962	0.727248	0.821362	-6.82997	0.299616	0.0810393
Q9V5P6	Q9V5P6	CG7637	FALSE	0	1.57461	1.12397	2.02525	30.7026	8.48027	0.00012216	0.0117274	1.83361	0.0042779	0.185679
Q9V5Q4	Q9V5Q4	CG12343	TRUE	3	-0.161523	-0.430013	0.106966	24.62	-1.46008	0.192934	0.355946	-5.85396	0.129842	0.110626
Q9V6B9	Q9V6B9	Nup54	FALSE	0	-0.0795331	-0.487612	0.328546	25.1969	-0.473012	0.652374	0.767263	-6.77939	0.279882	0.168142
Q9V6Q2	Q9V6Q2	cid	FALSE	0	-0.551577	-0.956073	-0.14708	26.8704	-3.30948	0.0154158	0.0854828	-3.30299	0.0311823	0.166665
Q9V726	Q9V726	Cpsf160	FALSE	0	0.550268	0.274904	0.825631	26.8903	4.84994	0.00259341	0.0346049	-1.39201	0.0126232	0.113459
Q9V773	Q9V773	Cyp6a20	TRUE	7	-0.109546	-0.54875	0.329659	24.3265	-0.605336	0.566406	0.699442	-6.70113	0.255142	0.180966
Q9V7P1	Q9V7P1	wcd	FALSE	0	-0.416092	-0.681685	-0.150498	28.5297	-3.80225	0.00838361	0.0616528	-2.65279	0.0224897	0.109433
Q9V7Y2	Q9V7Y2	Sply	FALSE	0	-0.061	-0.273648	0.151648	28.5737	-0.696204	0.511505	0.659674	-6.63755	0.240635	0.0876179
Q9V8R9	Q9V8R9	cora	FALSE	0	-0.395981	-0.640605	-0.151356	30.0489	-3.92865	0.007214	0.0569438	-2.4917	0.0207719	0.100793
Q9V8V8	Q9V8V8	par-1	FALSE	0	-0.0343622	-0.218641	0.149917	27.7393	-0.452558	0.666249	0.774684	-6.78991	0.282589	0.0759289
Q9V9K7	Q9V9K7	Ars2	FALSE	0	0.147929	-0.0520927	0.34795	30.802	1.79492	0.121144	0.267353	-5.41747	0.097525	0.0824152
Q9V9M7	Q9V9M7	RpL21	FALSE	0	0.654147	0.394472	0.913822	31.8168	6.11384	0.000767673	0.022248	-0.0883118	0.00811562	0.106994
Q9V9N4	Q9V9N4	Clamp	FALSE	0	-0.15989	-0.429941	0.11016	26.9664	-1.43696	0.199138	0.361984	-5.88263	0.132044	0.11127
Q9V9S8	Q9V9S8	FeCH	TRUE	5	-0.121487	-0.845507	0.602533	24.7794	-0.407237	0.697501	0.798146	-6.81165	0.291147	0.29832
Q9V9T4	Q9V9T4	Acf	FALSE	0	0.341383	0.0939411	0.588825	27.848	3.3484	0.0146721	0.0834681	-3.25043	0.0304474	0.101954
Q9V9T5	Q9V9T5	Mccc1	TRUE	6	1.31518	0.608	2.02236	24.065	4.51361	0.00371392	0.0428916	-1.77823	0.015646	0.291381
Q9V9U9	Q9V9U9	CG11563	FALSE	0	-0.00532656	-0.30895	0.298297	27.6324	-0.0425775	0.967374	0.977557	-6.90467	0.356593	0.125103
Q9V9V0	Q9V9V0	CstF50	FALSE	0	-0.697353	-1.40511	0.0104089	26.8098	-2.3913	0.052535	0.164794	-4.58505	0.0601136	0.291621
Q9V9W2	Q9V9W2	RpL6	FALSE	0	0.254453	0.0531632	0.455743	31.1705	3.068	0.021056	0.0996499	-3.63327	0.0363502	0.0829378
Q9V9Z8	Q9V9Z8	CG15561	TRUE	6	0.23606	-0.225527	0.697647	24.3397	1.24119	0.259367	0.420229	-6.11563	0.153291	0.190189
Q9V9Z9	Q9V9Z9	CG1542	FALSE	0	0.283536	0.00974471	0.557327	30.3611	2.51338	0.0443803	0.149164	-4.41189	0.0544121	0.112811
Q9VA18	Q9VA18	Chchd3	FALSE	0	-0.994446	-1.34786	-0.641033	27.1487	-6.82915	0.000417694	0.0164507	0.556427	0.00600088	0.145618
Q9VA69	Q9VA69	PH4alphaEFB	FALSE	0	0.129188	-0.152518	0.410893	26.8623	1.113	0.306928	0.4705	-6.25708	0.171629	0.116072
Q9VAA9	Q9VAA9	Jasper	FALSE	0	0.287113	0.0927722	0.481454	30.1511	3.58557	0.0109087	0.0716057	-2.93448	0.0261203	0.0800746
Q9VAC1	Q9VAC1	CG7920	FALSE	0	-0.310285	-0.537006	-0.0835638	29.059	-3.32152	0.0151814	0.0851429	-3.28671	0.0310584	0.0934163
Q9VAC4	Q9VAC4	Nph	FALSE	0	-0.45525	-0.771764	-0.138735	26.5863	-3.4908	0.0122677	0.0759806	-3.0598	0.0277162	0.130414
Q9VAC7	Q9VAC7	CG15525	TRUE	4	3.02512	1.60039	4.44986	25.9655	5.15322	0.00190125	0.0317427	-1.05841	0.0115791	0.587036
Q9VAC9	Q9VAC9	CG7903	FALSE	0	-0.137455	-0.320865	0.045954	25.7344	-1.8189	0.117136	0.262658	-5.38499	0.0958122	0.0755706
Q9VAF3	Q9VAF3	CG7824	FALSE	0	0.365221	0.0602082	0.670233	25.8398	2.90607	0.0260722	0.111863	-3.85825	0.0408052	0.125675
Q9VAH9	Q9VAH9	IntS11	FALSE	0	0.0565091	-0.10438	0.217398	27.0411	0.852436	0.425622	0.581633	-6.51094	0.212168	0.0662914
Q9VAJ1	Q9VAJ1	Cap-D2	FALSE	0	0.580031	0.395469	0.764594	27.4416	7.62741	0.000224245	0.0146378	1.20757	0.00533956	0.0760457
Q9VAJ2	Q9VAJ2	Bub3	FALSE	0	-0.267079	-0.489206	-0.0449518	26.3213	-2.91814	0.025657	0.110574	-3.84139	0.0403352	0.0915236
Q9VAL7	Q9VAL7	Cnx99A	FALSE	0	-0.0323297	-0.278604	0.213945	26.1465	-0.318604	0.760471	0.843382	-6.84784	0.307648	0.101473
Q9VAQ5	Q9VAQ5	CG11837	FALSE	0	-0.191622	-0.417397	0.0341522	24.8939	-2.05987	0.0834866	0.218287	-5.05262	0.0796267	0.0930264
Q9VAQ7	Q9VAQ7	Slu7	FALSE	0	0.0706789	-0.187611	0.328969	26.7991	0.664126	0.530482	0.67174	-6.66087	0.245037	0.106424
Q9VAW1	Q9VAW1	Moca-cyp	FALSE	0	0.404678	0.205124	0.604232	28.4508	4.92174	0.00240692	0.0345517	-1.31179	0.0126038	0.0822225
Q9VAW3	Q9VAW3	Gfat2	TRUE	4	0.175894	-0.58842	0.940208	24.9119	0.558531	0.596032	0.721923	-6.7308	0.263343	0.314922
Q9VAW5	Q9VAW5	larp	FALSE	0	-0.18964	-0.368677	-0.0106032	29.1394	-2.57073	0.0410186	0.142868	-4.33058	0.0521151	0.0737691
Q9VAX8	Q9VAX8	CG4849	FALSE	0	0.0930835	-0.0905017	0.276669	31.6581	1.23056	0.263052	0.423087	-6.12771	0.154333	0.0756431
Q9VAY2	Q9VAY2	Gp93	TRUE	1	1.04285	0.719796	1.36591	24.7309	7.83455	0.000192507	0.0140805	1.36587	0.00513627	0.133109
Q9VAY6	Q9VAY6	BCAS2	FALSE	0	-0.229776	-0.43485	-0.0247033	29.3755	-2.71935	0.0334998	0.127763	-4.12043	0.0466051	0.0844968
Q9VAY8	Q9VAY8	CG33213	TRUE	2	-0.658129	-1.44797	0.131714	25.2542	-2.02227	0.0880164	0.22346	-5.10508	0.0815135	0.325441
Q9VB04	Q9VB04	btz	TRUE	1	-0.450539	-1.05522	0.154139	25.232	-1.80833	0.118887	0.264836	-5.39933	0.0966065	0.249147
Q9VB46	Q9VB46	Hmu	FALSE	0	-0.147254	-0.338264	0.0437554	27.2949	-1.87103	0.108867	0.252216	-5.31395	0.0920032	0.0787022
Q9VB49	Q9VB49	mrt	FALSE	0	0.261512	-0.0350221	0.558046	26.4094	2.14035	0.0745677	0.203801	-4.9398	0.0743423	0.122182
Q9VB52	Q9VB52	l(3)mbt	FALSE	0	0.219587	-0.0844476	0.523621	26.8205	1.75288	0.128497	0.277987	-5.47409	0.101404	0.125272
Q9VB62	Q9VB62	DNApol-alpha73	TRUE	2	-0.234834	-0.516245	0.0465765	24.8199	-2.0253	0.0876424	0.223248	-5.10086	0.0814363	0.11595
Q9VB74	Q9VB74	CG6066	FALSE	0	0.306353	0.0751675	0.537539	26.7371	3.21611	0.0173736	0.0904605	-3.42989	0.0329981	0.0952559
Q9VBB3	Q9VBB3	IntS12	TRUE	1	-0.20234	-0.494949	0.0902695	25.3212	-1.67827	0.142625	0.296846	-5.57345	0.108283	0.120564
Q9VBH8	Q9VBH8	RpL34a	FALSE	0	-0.0267118	-0.238553	0.18513	29.5632	-0.306028	0.769585	0.850419	-6.85229	0.310215	0.0872854
Q9VBI4	Q9VBI4	Exo84	FALSE	0	-0.197333	-0.422472	0.0278065	25.201	-2.12724	0.075952	0.206482	-4.95823	0.0753203	0.0927647
Q9VBK9	Q9VBK9	CG5913	FALSE	0	-0.112758	-0.333522	0.108006	28.4988	-1.23962	0.259907	0.420229	-6.11741	0.153291	0.0909619
Q9VBN5	Q9VBN5	RpL27	FALSE	0	0.372853	0.161268	0.584437	29.7866	4.27684	0.00482918	0.0480354	-2.06062	0.0175223	0.0871795
Q9VBP5	Q9VBP5	jigr1	FALSE	0	-0.312116	-0.612005	-0.0122265	27.2889	-2.52594	0.0436196	0.147576	-4.39407	0.0538329	0.123564
Q9VBU4	Q9VBU4	CG11858	TRUE	7	-0.470056	-0.945507	0.00539444	24.8132	-2.39946	0.0519441	0.163496	-4.57348	0.0596401	0.195901
Q9VBU6	Q9VBU6	CG11857	TRUE	1	1.14267	-0.21778	2.50311	26.3635	2.03848	0.0860338	0.220614	-5.08249	0.0804755	0.560548
Q9VBU8	Q9VBU8	Nup37	FALSE	0	-0.168105	-0.412495	0.0762838	27.4185	-1.66943	0.144395	0.29891	-5.58512	0.109036	0.100696
Q9VBU9	Q9VBU9	RpS27	FALSE	0	0.104705	-0.206882	0.416291	27.6908	0.81556	0.444899	0.600497	-6.5427	0.219049	0.128384
Q9VBV8	Q9VBV8	Alg9	TRUE	1	-0.0579036	-0.428325	0.312518	24.9748	-0.379383	0.717039	0.815227	-6.82393	0.297378	0.152626
Q9VBX1	Q9VBX1	Clbn	FALSE	0	0.0659594	-0.143617	0.275536	26.2261	0.763842	0.472976	0.625207	-6.58532	0.228063	0.0863521
Q9VBX3	Q9VBX3	vig2	FALSE	0	0.274417	0.0241352	0.524699	26.5065	2.66103	0.0362594	0.134098	-4.20278	0.0489164	0.103124
Q9VBX4	Q9VBX4	CG31510	FALSE	0	-0.168867	-0.417501	0.0797668	27.7982	-1.64837	0.148699	0.304535	-5.61283	0.111088	0.102445
Q9VBY2	Q9VBY2	CG11920	FALSE	0	-0.191667	-0.55583	0.172496	28.68	-1.27738	0.247145	0.407459	-6.074	0.148633	0.150047
Q9VBY6	Q9VBY6	PQBP1	TRUE	3	-0.353732	-0.856329	0.148865	25.0824	-1.70814	0.136798	0.289474	-5.53385	0.105594	0.207086
Q9VBZ5	Q9VBZ5	Ythdf	FALSE	0	0.194349	-0.133097	0.521794	26.1759	1.44049	0.198179	0.361954	-5.87827	0.132033	0.134918
Q9VC08	Q9VC08	Mink	FALSE	0	-0.0385693	-0.204104	0.126965	27.5583	-0.565487	0.591574	0.720659	-6.72653	0.262882	0.0682055
Q9VC28	Q9VC28	CG7006	FALSE	0	-0.6381	-0.86948	-0.406721	29.2329	-6.6932	0.000467066	0.0174689	0.438574	0.0063723	0.0953357
Q9VC36	Q9VC36	polybromo	FALSE	0	0.0743933	-0.134642	0.283429	28.672	0.863738	0.419837	0.575263	-6.50099	0.209844	0.0861295
Q9VC45	Q9VC45	asp	FALSE	0	-0.33253	-2.15461	1.48955	25.7084	-0.442927	0.672832	0.779552	-6.79471	0.284364	0.750757
Q9VC49	Q9VC49	Rpb10	FALSE	0	-0.295598	-0.556687	-0.0345088	26.2471	-2.74778	0.0322366	0.125039	-4.08036	0.0456117	0.107577
Q9VC54	Q9VC54	CG6695	FALSE	0	0.418797	0.0790485	0.758545	25.9204	2.99168	0.0232767	0.103886	-3.73899	0.0378956	0.139987
Q9VC60	Q9VC60	CG13625	TRUE	2	-0.398336	-0.782092	-0.0145808	25.0137	-2.51921	0.0440255	0.148297	-4.40362	0.0540955	0.15812
Q9VC93	Q9VC93	Dis3	FALSE	0	-0.0474116	-0.300817	0.205994	27.0914	-0.454085	0.665207	0.774521	-6.78914	0.282529	0.104411
Q9VC94	Q9VC94	CG5728	FALSE	0	-0.0226346	-0.224529	0.17926	31.6011	-0.272092	0.794373	0.865359	-6.86341	0.315665	0.0831872
Q9VC96	Q9VC96	BRWD3	FALSE	0	0.419403	0.228524	0.610283	28.9195	5.33262	0.00159133	0.0310667	-0.867457	0.0113325	0.0786485
Q9VCB8	Q9VCB8	jnj	TRUE	6	0.116909	-0.244241	0.478058	24.4974	0.78565	0.460989	0.616257	-6.56763	0.224798	0.148805
Q9VCC6	Q9VCC6	CG6178	TRUE	4	-0.0726536	-0.654062	0.508755	24.8613	-0.30328	0.771581	0.85146	-6.85323	0.310595	0.239559
Q9VCD8	Q9VCD8	SMC1	FALSE	0	0.443058	0.243765	0.642351	28.8022	5.39558	0.00149647	0.0302444	-0.801551	0.0110325	0.0821151
Q9VCE3	Q9VCE3	Rox8	TRUE	2	0.165299	-0.742735	1.07333	25.7865	0.441811	0.673597	0.779552	-6.79526	0.284364	0.374139
Q9VCG3	Q9VCG3	CG13601	TRUE	1	0.00811345	-0.255561	0.271788	25.0759	0.0746802	0.942817	0.963007	-6.90251	0.351285	0.108643
Q9VCG4	Q9VCG4	Ndc1	FALSE	0	0.121685	-0.363593	0.606963	26.3746	0.608576	0.564389	0.698551	-6.69899	0.254817	0.19995
Q9VCH2	Q9VCH2	CG33111	TRUE	3	-2.34187	-7.54118	2.85744	30.1469	-1.09317	0.314903	0.477724	-6.27807	0.174264	2.14228
Q9VCH5	Q9VCH5	Nup98-96	FALSE	0	0.147665	-0.0580166	0.353346	31.1265	1.74241	0.130394	0.280905	-5.48812	0.102468	0.0847474
Q9VCK0	Q9VCK0	eIF3d1	FALSE	0	0.110851	-0.134697	0.3564	29.9117	1.09565	0.313894	0.476896	-6.27545	0.173962	0.101174
Q9VCU6	Q9VCU6	HP1c	FALSE	0	0.287191	-0.173475	0.747857	27.2024	1.51305	0.179382	0.336834	-5.78743	0.12287	0.189809
Q9VCW3	Q9VCW3	Nup133	FALSE	0	0.201926	-0.147882	0.551733	30.6499	1.40098	0.209162	0.372441	-5.92682	0.135859	0.144132
Q9VCX1	Q9VCX1	loco	TRUE	3	-0.589512	-1.20284	0.0238144	24.938	-2.33276	0.0569868	0.173674	-4.66805	0.0633527	0.25271
Q9VCX7	Q9VCX7	CG31156	FALSE	0	-0.265185	-0.629481	0.0991115	25.5089	-1.7667	0.126033	0.274591	-5.45552	0.100165	0.150102
Q9VCY1	Q9VCY1	CG6937	FALSE	0	-0.15723	-0.323768	0.0093087	30.4376	-2.29134	0.0603717	0.18147	-4.72672	0.0661963	0.0686192
Q9VD07	Q9VD07	CG12499	FALSE	0	0.245245	0.055215	0.435275	30.1696	3.13218	0.0193655	0.0960551	-3.54483	0.0350389	0.0782985
Q9VD26	Q9VD26	CG5382	TRUE	3	0.74995	0.116413	1.38349	24.9366	2.87296	0.0272487	0.112987	-3.90456	0.0412152	0.261038
Q9VD52	Q9VD52	CG6015	FALSE	0	0.291403	0.0231793	0.559626	29.7826	2.63673	0.0374799	0.135554	-4.23714	0.0494473	0.110517
Q9VD58	Q9VD58	Idh3b	TRUE	6	-0.247461	-0.607793	0.112871	24.3816	-1.66676	0.144934	0.299622	-5.58864	0.109296	0.148468
Q9VD81	Q9VD81	RpI12	TRUE	5	-1.57998	-1.92416	-1.23579	25.1543	-11.1411	2.46184e-05	0.00539248	3.42035	0.00196707	0.141815
Q9VDE5	Q9VDE5	ppan	FALSE	0	-0.273776	-0.443327	-0.104224	30.6493	-3.91888	0.00729759	0.0571893	-2.50406	0.0208615	0.0698606
Q9VDI1	Q9VDI1	Synd	TRUE	1	0.115216	-0.464653	0.695085	25.307	0.482228	0.646171	0.762889	-6.77451	0.278286	0.238925
Q9VDK7	Q9VDK7	Srp72	FALSE	0	-0.142952	-0.447043	0.161139	26.4758	-1.14092	0.295984	0.459688	-6.22711	0.167685	0.125295
Q9VDL2	Q9VDL2	TFAM	FALSE	0	-0.737267	-1.07782	-0.396709	27.2469	-5.25415	0.00171926	0.0313438	-0.95041	0.0114336	0.140321
Q9VDN4	Q9VDN4	CG4360	FALSE	0	-0.0553952	-0.275337	0.164547	28.1641	-0.611271	0.562714	0.698166	-6.69721	0.254676	0.0906231
Q9VDQ3	Q9VDQ3	CG4936	FALSE	0	-0.0508149	-0.352334	0.250705	26.1519	-0.40902	0.696259	0.798099	-6.81083	0.29113	0.124236
Q9VDR1	Q9VDR1	MED25	FALSE	0	0.0272138	-0.484964	0.539391	25.8789	0.128955	0.901469	0.934316	-6.89617	0.340819	0.211034
Q9VDS6	Q9VDS6	Surf6	FALSE	0	-0.337177	-0.559407	-0.114947	30.0122	-3.68234	0.0096899	0.0670437	-2.80782	0.0244561	0.0915659
Q9VDT1	Q9VDT1	Arc42	FALSE	0	-0.0325043	-0.321746	0.256737	25.4772	-0.272741	0.793896	0.865359	-6.86321	0.315665	0.119177
Q9VDV3	Q9VDV3	Nup58	FALSE	0	-0.287251	-0.535379	-0.0391232	25.9918	-2.80967	0.0296584	0.117411	-3.9933	0.042829	0.102237
Q9VDY1	Q9VDY1	Ino80	FALSE	0	0.0649552	-0.154363	0.284274	26.9657	0.718798	0.498408	0.647678	-6.62055	0.23626	0.0903663
Q9VDZ4	Q9VDZ4	Nsun5	TRUE	5	-0.403255	-0.869015	0.0625049	24.7913	-2.10129	0.0787687	0.211519	-4.99464	0.0771577	0.191908
Q9VE17	Q9VE17	snRNP-U1-C	FALSE	0	0.0175574	-0.353796	0.388911	26.7086	0.114747	0.912266	0.940778	-6.89815	0.343176	0.15301
Q9VE18	Q9VE18	Smu1	FALSE	0	0.0933337	-0.108706	0.295374	25.2197	1.12117	0.303691	0.467404	-6.24836	0.1705	0.0832469
Q9VE51	Q9VE51	Cpsf73	FALSE	0	0.432094	-0.0393323	0.903521	25.735	2.2245	0.0662777	0.190999	-4.82122	0.0696725	0.194243
Q9VE52	Q9VE52	CstF64	FALSE	0	-0.374874	-0.675476	-0.0742723	27.7647	-3.02665	0.0222291	0.103134	-3.69047	0.0376211	0.123858
Q9VE85	Q9VE85	Nup43	FALSE	0	-0.102132	-0.294733	0.0904703	28.7663	-1.28697	0.243993	0.40516	-6.06285	0.147794	0.0793582
Q9VE94	Q9VE94	CG18600	FALSE	0	-0.316165	-0.653171	0.0208413	27.6362	-2.2769	0.0615996	0.183546	-4.74715	0.0669537	0.138857
Q9VE98	Q9VE98	CG8064	FALSE	0	0.168755	-0.0305775	0.368087	29.4519	2.05469	0.084096	0.218361	-5.05986	0.0796536	0.0821313
Q9VEA5	Q9VEA5	Rpb4	FALSE	0	-0.275972	-0.617768	0.0658234	27.3089	-1.9596	0.0961229	0.235103	-5.19208	0.0857608	0.140831
Q9VEB3	Q9VEB3	Non3	FALSE	0	0.341019	0.0846272	0.597411	30.0636	3.22807	0.0171082	0.0904605	-3.41357	0.0329981	0.105642
Q9VEB9	Q9VEB9	Ssdp	FALSE	0	-0.117668	-0.320818	0.0854829	26.3284	-1.40575	0.207807	0.371584	-5.92099	0.135546	0.0837046
Q9VEC1	Q9VEC1	MED17	FALSE	0	-0.108268	-0.410524	0.193987	27.0337	-0.869353	0.416985	0.574388	-6.496	0.209525	0.124539
Q9VEF0	Q9VEF0	Odj	FALSE	0	0.513636	0.0913004	0.935971	27.2495	2.95166	0.024541	0.106785	-3.79466	0.0389529	0.174016
Q9VEF5	Q9VEF5	CG7379	FALSE	0	-0.0164038	-0.250753	0.217945	26.5859	-0.169883	0.870502	0.912969	-6.88916	0.333032	0.0965595
Q9VEG9	Q9VEG9	CG7655	FALSE	0	-0.184627	-0.535215	0.16596	26.6657	-1.27811	0.246904	0.407459	-6.07315	0.148633	0.144453
Q9VEJ1	Q9VEJ1	SF1	FALSE	0	-0.00859888	-0.184585	0.167387	27.6146	-0.118586	0.909347	0.940577	-6.89764	0.343103	0.0725118
Q9VEL2	Q9VEL2	Brf	FALSE	0	0.401088	-0.0866849	0.888861	28.4066	1.99568	0.0913687	0.228943	-5.14207	0.0835139	0.200978
Q9VEN1	Q9VEN1	cher	TRUE	1	0.0795628	-1.21736	1.37649	25.1386	0.14889	0.886359	0.923346	-6.89299	0.336818	0.534374
Q9VEN9	Q9VEN9	Patr-1	TRUE	2	-0.31527	-0.811591	0.181052	24.9938	-1.54166	0.172436	0.327988	-5.75105	0.119643	0.204501
Q9VEP0	Q9VEP0	CG3995	FALSE	0	-0.342391	-0.542188	-0.142593	28.509	-4.15911	0.00551971	0.0507681	-2.20427	0.0185192	0.082323
Q9VEP9	Q9VEP9	Sf3a1	FALSE	0	0.14162	-0.145532	0.428772	26.6661	1.19697	0.275007	0.436641	-6.16551	0.159278	0.118316
Q9VEQ2	Q9VEQ2	EMC2B	FALSE	0	-0.395112	-0.585653	-0.204571	25.8289	-5.0327	0.00214772	0.0333223	-1.18934	0.0121553	0.078509
Q9VES0	Q9VES0	CG10324	TRUE	4	0.490483	0.108392	0.872574	24.8593	3.11548	0.0197906	0.0974307	-3.56779	0.0355407	0.157434
Q9VEX5	Q9VEX5	asun	FALSE	0	-0.122482	-0.354896	0.109932	27.3539	-1.27902	0.246603	0.407459	-6.07209	0.148633	0.0957621
Q9VEX6	Q9VEX6	bor	FALSE	0	0.0768309	-0.0922198	0.245882	30.7076	1.10303	0.310915	0.474245	-6.26766	0.172995	0.0696543
Q9VEY5	Q9VEY5	CG5903	FALSE	0	-1.29425	-1.87067	-0.717816	26.7234	-5.44928	0.00142058	0.0290934	-0.745771	0.0106127	0.237507
Q9VEZ3	Q9VEZ3	msps	FALSE	0	0.0855372	-0.0980017	0.269076	29.5124	1.13109	0.2998	0.463273	-6.23772	0.168992	0.075624
Q9VEZ8	Q9VEZ8	pnr	FALSE	0	0.104554	-0.116812	0.325919	26.6041	1.1463	0.293913	0.45786	-6.22128	0.167018	0.0912097
Q9VF56	Q9VF56	obe	TRUE	4	-0.567604	-0.880906	-0.254302	24.9353	-4.39694	0.00422259	0.0454719	-1.91629	0.0165872	0.129091
Q9VF87	Q9VF87	Sra-1	FALSE	0	0.374383	-0.0313046	0.780071	27.84	2.23972	0.064883	0.189109	-4.79973	0.0689829	0.167156
Q9VF92	Q9VF92	ear	TRUE	3	0.314112	-0.0856693	0.713893	24.1498	1.90691	0.103513	0.247517	-5.26475	0.0902889	0.164723
Q9VFB5	Q9VFB5	Rpb7	FALSE	0	-0.193918	-0.475339	0.0875024	26.8132	-1.67237	0.143805	0.29809	-5.58124	0.108737	0.115954
Q9VFC0	Q9VFC0	Mau2	FALSE	0	0.375996	0.0717926	0.6802	28.618	2.99977	0.0230297	0.103886	-3.72776	0.0378956	0.125342
Q9VFE6	Q9VFE6	CG3817	FALSE	0	0.201298	-0.250493	0.65309	28.8006	1.08136	0.31973	0.480534	-6.29044	0.175289	0.186153
Q9VFE7	Q9VFE7	Nup93-2	FALSE	0	0.380305	0.028898	0.731712	28.7644	2.62658	0.0380025	0.13614	-4.2515	0.0496612	0.144791
Q9VFF3	Q9VFF3	Rrp6	FALSE	0	0.0178274	-0.301142	0.336797	27.528	0.135646	0.896392	0.931332	-6.89515	0.339731	0.131426
Q9VFP0	Q9VFP0	CG3061	FALSE	0	-0.371963	-0.768806	0.0248789	25.4125	-2.27484	0.0617771	0.183546	-4.75007	0.0669537	0.163512
Q9VFS6	Q9VFS6	omd	FALSE	0	0.233969	-0.0289573	0.496896	26.2611	2.1597	0.0725726	0.201212	-4.91259	0.0733981	0.108334
Q9VFT4	Q9VFT4	rin	FALSE	0	0.286257	-0.0636942	0.636208	29.7056	1.98526	0.092717	0.231435	-5.15653	0.0844227	0.144191
Q9VFV8	Q9VFV8	CG9799	FALSE	0	0.296012	0.0798594	0.512165	29.1164	3.32367	0.0151401	0.0851429	-3.28381	0.0310584	0.089062
Q9VFV9	Q9VFV9	Droj2	FALSE	0	-0.0485174	-0.228873	0.131838	30.2984	-0.652886	0.537237	0.678566	-6.66882	0.247527	0.0743123
Q9VG73	Q9VG73	CG5641	FALSE	0	-0.19249	-0.39719	0.0122107	25.1864	-2.28222	0.0611443	0.182719	-4.73963	0.0666521	0.0843431
Q9VG78	Q9VG78	pps	FALSE	0	0.190375	-0.161078	0.541828	28.3267	1.31466	0.23509	0.397247	-6.0304	0.144908	0.14481
Q9VG81	Q9VG81	Sccpdh2	FALSE	0	0.0157964	-0.170885	0.202478	25.4263	0.205365	0.843854	0.900111	-6.88155	0.328342	0.0769189
Q9VG84	Q9VG84	DNAlig3	FALSE	0	0.191825	-0.0213402	0.404991	27.3592	2.18403	0.0701407	0.196958	-4.87833	0.0718463	0.0878311
Q9VGA4	Q9VGA4	MBD-R2	FALSE	0	0.16321	-0.00380826	0.330229	29.4945	2.37166	0.0539872	0.168203	-4.61292	0.0613571	0.0688171
Q9VGF7	Q9VGF7	GC1	TRUE	4	-0.148937	-0.384981	0.0871072	24.5249	-1.53136	0.174907	0.330858	-5.76418	0.12069	0.0972577
Q9VGH0	Q9VGH0	CG6962	FALSE	0	0.313813	-0.0930319	0.720659	27.5689	1.87202	0.108716	0.252216	-5.3126	0.0920032	0.167633
Q9VGH5	Q9VGH5	glo	FALSE	0	0.40267	0.149104	0.656236	30.0927	3.85414	0.00787977	0.0596223	-2.58637	0.021749	0.104477
Q9VGI8	Q9VGI8	Blm	FALSE	0	0.107928	-0.157314	0.37317	26.3626	0.987553	0.360274	0.522057	-6.38541	0.190436	0.109288
Q9VGL0	Q9VGL0	CG14712	FALSE	0	0.161916	-0.0315396	0.355371	28.2662	2.03131	0.0869048	0.222476	-5.09248	0.0811547	0.0797099
Q9VGL2	Q9VGL2	CG14711	TRUE	2	0.433021	-0.176201	1.04224	25.2393	1.72505	0.133601	0.285821	-5.51132	0.104262	0.251019
Q9VGN9	Q9VGN9	RpL24-like	FALSE	0	0.101573	-0.178069	0.381214	29.5286	0.881544	0.410842	0.569029	-6.48509	0.20757	0.115221
Q9VGQ1	Q9VGQ1	CG5214	FALSE	0	-0.134706	-0.307058	0.0376464	25.7385	-1.89687	0.104984	0.249237	-5.27854	0.0909164	0.0710148
Q9VGT3	Q9VGT3	Ugt302C1	TRUE	5	-0.0833776	-0.40661	0.239855	24.4691	-0.626041	0.553589	0.690749	-6.68732	0.251971	0.133182
Q9VGU4	Q9VGU4	Leash	TRUE	7	0.223073	-0.153248	0.599394	24.3909	1.43866	0.198678	0.361984	-5.88054	0.132044	0.155056
Q9VGZ2	Q9VGZ2	Rrp46	TRUE	5	-0.633539	-0.854071	-0.413007	24.7499	-6.97222	0.00037207	0.0158191	0.678174	0.00577047	0.0908662
Q9VH07	Q9VH07	pont	FALSE	0	0.181349	-0.032916	0.395614	29.1762	2.05415	0.08416	0.218361	-5.06061	0.0796536	0.0882841
Q9VH20	Q9VH20	TAF1B	FALSE	0	0.285198	0.0383331	0.532062	26.8197	2.80386	0.0298908	0.118026	-4.00146	0.0430536	0.101716
Q9VH45	Q9VH45	CG5359	TRUE	7	-0.24537	-0.61703	0.126289	24.5322	-1.60231	0.158538	0.314025	-5.67296	0.11455	0.153136
Q9VH64	Q9VH64	CG8507	FALSE	0	-0.0514552	-0.285574	0.182663	29.3933	-0.533412	0.612292	0.734751	-6.74584	0.268022	0.0964643
Q9VH84	Q9VH84	Pnn	FALSE	0	0.662333	0.44318	0.881486	28.803	7.33495	0.000279827	0.0146378	0.976814	0.00533956	0.0902982
Q9VH89	Q9VH89	dmt	TRUE	2	0.148578	-0.464833	0.761989	25.0381	0.587858	0.577366	0.710035	-6.71246	0.259006	0.252745
Q9VHA8	Q9VHA8	P58IPK	TRUE	5	0.253265	0.0651783	0.441352	24.3619	3.26803	0.0162536	0.0879066	-3.35919	0.0320665	0.0774978
Q9VHC0	Q9VHC0	RnpS1	FALSE	0	0.0326433	-0.221307	0.286593	28.1303	0.311971	0.765273	0.846263	-6.85021	0.308699	0.104636
Q9VHC4	Q9VHC4	CG8176	FALSE	0	-0.101492	-0.410856	0.207873	27.0277	-0.796214	0.45526	0.611258	-6.55891	0.222974	0.127468
Q9VHC7	Q9VHC7	rump	FALSE	0	-0.286179	-0.482974	-0.0893841	33.3984	-3.52933	0.0116938	0.0744833	-3.00869	0.02717	0.0810859
Q9VHE5	Q9VHE5	RpL34b	FALSE	0	-0.0165664	-0.247801	0.214669	27.0291	-0.173878	0.867492	0.911401	-6.88838	0.33246	0.0952763
Q9VHG6	Q9VHG6	Ibf2	FALSE	0	-0.0396726	-0.255924	0.176578	28.2761	-0.445247	0.671243	0.779552	-6.79356	0.284364	0.0891024
Q9VHH8	Q9VHH8	beag	FALSE	0	0.0924294	-0.199768	0.384627	29.0294	0.76772	0.470829	0.624519	-6.5822	0.227812	0.120395
Q9VHI1	Q9VHI1	hyx	FALSE	0	0.140446	-0.183913	0.464805	28.3419	1.05088	0.332478	0.494373	-6.32196	0.180337	0.133646
Q9VHI4	Q9VHI4	Sf3b5	TRUE	2	-0.630219	-1.3401	0.0796635	25.0747	-2.15464	0.0730895	0.201916	-4.91972	0.0736549	0.292495
Q9VHL1	Q9VHL1	CG9839	FALSE	0	-0.312129	-0.648599	0.024342	25.9481	-2.25141	0.0638312	0.186752	-4.7832	0.0681232	0.138637
Q9VHL2	Q9VHL2	CCT7	FALSE	0	0.113361	-0.212166	0.438889	26.0774	0.845173	0.429369	0.584569	-6.51728	0.213239	0.134128
Q9VHM3	Q9VHM3	M1BP	FALSE	0	-0.169891	-0.405532	0.0657507	30.1145	-1.74979	0.129053	0.278799	-5.47823	0.1017	0.0970919
Q9VHM5	Q9VHM5	CG8159	TRUE	1	0.842799	0.485259	1.20034	24.8474	5.72095	0.0010977	0.0255464	-0.469794	0.00931881	0.147318
Q9VHN7	Q9VHN7	CG8036	FALSE	0	-0.0723122	-0.308744	0.16412	26.3772	-0.742292	0.48503	0.636209	-6.6024	0.232076	0.0974175
Q9VHP0	Q9VHP0	bel	FALSE	0	-0.227411	-0.400206	-0.0546167	32.7319	-3.19412	0.017873	0.0921239	-3.45992	0.0336049	0.0711969
Q9VHP9	Q9VHP9	Cenp-C	FALSE	0	-0.506631	-0.692871	-0.320391	29.0777	-6.60219	0.000503837	0.0175885	0.358496	0.00641591	0.0767368
Q9VHR5	Q9VHR5	CG9684	FALSE	0	-0.313624	-0.593491	-0.0337571	26.6456	-2.71973	0.0334825	0.127763	-4.11989	0.0466051	0.115314
Q9VHS0	Q9VHS0	CG9601	TRUE	3	0.328063	-0.22573	0.881856	24.6941	1.43773	0.198929	0.361984	-5.88168	0.132044	0.228181
Q9VHS8	Q9VHS8	CG7483	FALSE	0	0.151191	-0.0466701	0.349051	29.4472	1.85453	0.11142	0.255435	-5.3365	0.0931772	0.081525
Q9VHT2	Q9VHT2	tex	FALSE	0	-0.275593	-0.628764	0.0775794	26.2252	-1.89387	0.105429	0.249671	-5.28267	0.091075	0.145518
Q9VI10	Q9VI10	SmD2	FALSE	0	0.187453	-0.0470838	0.421989	25.6218	1.93977	0.0988408	0.240601	-5.21949	0.0877664	0.0966367
Q9VI18	Q9VI18	CG1024	FALSE	0	-0.123231	-0.332947	0.0864839	27.1071	-1.42613	0.202108	0.364792	-5.89599	0.133069	0.0864095
Q9VI24	Q9VI24	Zif	TRUE	3	-0.077211	-0.316771	0.162349	24.7192	-0.78223	0.462855	0.61714	-6.57043	0.22512	0.0987063
Q9VI54	Q9VI54	CG1965	TRUE	4	0.161339	-0.649612	0.972291	24.4935	0.482853	0.645752	0.762889	-6.77418	0.278286	0.334138
Q9VI58	Q9VI58	Tailor	FALSE	0	-0.0612763	-0.292674	0.170122	26.4876	-0.642689	0.543412	0.68153	-6.67593	0.248608	0.0953435
Q9VI82	Q9VI82	CG1234	FALSE	0	0.061503	-0.116927	0.239933	30.0395	0.836561	0.433845	0.588525	-6.52475	0.214682	0.0735189
Q9VID9	Q9VID9	CG8677	FALSE	0	0.0719272	-0.297835	0.44169	27.8473	0.472106	0.652986	0.767396	-6.77987	0.27993	0.152354
Q9VIE8	Q9VIE8	mAcon1	TRUE	7	0.0768696	-0.103767	0.257506	24.4219	1.0328	0.34023	0.501049	-6.34036	0.182772	0.0744281
Q9VIF0	Q9VIF0	CG9246	FALSE	0	-0.0486884	-0.209224	0.111848	30.5434	-0.736075	0.488547	0.637702	-6.60725	0.23262	0.066146
Q9VIF6	Q9VIF6	CG9253	FALSE	0	0.167033	-0.0393323	0.373398	29.0423	1.96442	0.0954737	0.234261	-5.18541	0.0854537	0.0850292
Q9VIG1	Q9VIG1	l(2)05287	FALSE	0	0.150701	-0.0497583	0.35116	29.9133	1.82456	0.116209	0.261342	-5.37731	0.0953323	0.0825956
Q9VIH1	Q9VIH1	RPA2	FALSE	0	-0.522547	-0.775958	-0.269136	25.9406	-5.0046	0.00221025	0.0336133	-1.22017	0.0122614	0.104413
Q9VIP0	Q9VIP0	nesd	FALSE	0	-0.0327202	-0.342924	0.277484	26.7433	-0.255998	0.806222	0.874546	-6.86824	0.319016	0.127814
Q9VIP9	Q9VIP9	barr	FALSE	0	0.340518	-0.0670485	0.748085	26.3859	2.02773	0.0873434	0.223227	-5.09747	0.0814287	0.167931
Q9VIS0	Q9VIS0	CG10466	TRUE	6	0.542765	0.211759	0.873771	24.5597	3.97965	0.00679432	0.0552173	-2.42739	0.0201421	0.136385
Q9VIS4	Q9VIS4	CG10463	TRUE	7	0.388119	0.0942716	0.681966	24.3157	3.20562	0.0176099	0.0910732	-3.44421	0.0332216	0.121075
Q9VIT3	Q9VIT3	msb1l	FALSE	0	-0.040438	-0.298003	0.217127	24.9722	-0.381041	0.715869	0.8145	-6.82323	0.297113	0.106125
Q9VIV2	Q9VIV2	swm	FALSE	0	0.231492	0.0183712	0.444612	27.2481	2.6362	0.0375068	0.135554	-4.23789	0.0494473	0.0878125
Q9VIW3	Q9VIW3	RanGAP	FALSE	0	-0.138571	-0.336274	0.0591319	31.5707	-1.70109	0.138152	0.291287	-5.54322	0.106255	0.0814599
Q9VIW7	Q9VIW7	RtcB	FALSE	0	-0.0906019	-0.34464	0.163436	27.0039	-0.865581	0.4189	0.575004	-6.49935	0.20975	0.104672
Q9VIZ3	Q9VIZ3	l(2)37Cb	TRUE	1	0.0610951	-0.625719	0.74791	25.1334	0.215892	0.83599	0.894555	-6.87902	0.326315	0.28299
Q9VJ11	Q9VJ11	CG10470	TRUE	1	-0.608241	-1.42715	0.210673	26.0197	-1.80263	0.119841	0.265622	-5.40705	0.0968935	0.337419
Q9VJ12	Q9VJ12	Acn	FALSE	0	0.0666762	-0.13802	0.271373	30.2563	0.79055	0.458326	0.614177	-6.56359	0.224039	0.0843416
Q9VJ19	Q9VJ19	RpL30	FALSE	0	-0.184671	-0.367611	-0.00173072	29.4946	-2.44995	0.0484371	0.157829	-4.50185	0.0575727	0.0753772
Q9VJ25	Q9VJ25	EMC5	TRUE	1	1.28966	0.347223	2.2321	25.9019	3.32117	0.0151883	0.0851429	-3.28719	0.0310584	0.388316
Q9VJ73	Q9VJ73	Atac2	TRUE	4	0.0920231	-0.692683	0.87673	24.8613	0.284615	0.785193	0.857792	-6.85945	0.312905	0.323324
Q9VJ74	Q9VJ74	CG10333	FALSE	0	0.288496	0.074814	0.502178	27.9628	3.27673	0.0160737	0.0875504	-3.34738	0.0319366	0.0880439
Q9VJ77	Q9VJ77	CG15160	FALSE	0	-0.14625	-0.34379	0.0512903	27.9659	-1.79684	0.120819	0.267018	-5.41488	0.0974027	0.0813929
Q9VJ86	Q9VJ86	bsf	FALSE	0	0.358353	-0.382958	1.09966	25.9362	1.17322	0.283735	0.446077	-6.19184	0.16272	0.305444
Q9VJ87	Q9VJ87	ncm	FALSE	0	0.287022	0.056703	0.517341	30.1588	3.0245	0.022292	0.103134	-3.69345	0.0376211	0.0948988
Q9VJE4	Q9VJE4	Rpb11	TRUE	6	-1.01373	-2.46062	0.433162	24.927	-1.70041	0.138283	0.291287	-5.54412	0.106255	0.596165
Q9VJG2	Q9VJG2	CG12288	TRUE	1	0.556487	-0.273154	1.38613	25.8486	1.62792	0.152992	0.308798	-5.6396	0.112643	0.341839
Q9VJH2	Q9VJH2	AspRS-m	TRUE	2	0.394886	-0.364679	1.15445	24.7477	1.26176	0.252358	0.413022	-6.09205	0.150662	0.312965
Q9VJI6	Q9VJI6	BuGZ	FALSE	0	0.312212	-0.0889855	0.71341	28.023	1.88869	0.106199	0.250405	-5.28977	0.0913427	0.165306
Q9VJJ8	Q9VJJ8	mtgo	FALSE	0	-0.292305	-0.617118	0.032508	25.3774	-2.1841	0.0701338	0.196958	-4.87823	0.0718463	0.133833
Q9VJQ4	Q9VJQ4	Rnmt	TRUE	2	0.643982	-0.221543	1.50951	25.3703	1.80577	0.119314	0.264836	-5.40279	0.0966065	0.356624
Q9VJQ5	Q9VJQ5	NC2beta	TRUE	2	2.94084	1.7506	4.13108	26.895	5.9966	0.000852565	0.0238098	-0.200026	0.00868533	0.490418
Q9VJQ6	Q9VJQ6	DCTN5-p25	TRUE	3	0.246957	-0.140499	0.634413	24.4286	1.54692	0.171187	0.326233	-5.74433	0.119003	0.159644
Q9VJY7	Q9VJY7	CG7099	TRUE	5	0.316105	-0.655942	1.28815	24.8031	0.789246	0.459033	0.614177	-6.56467	0.224039	0.400515
Q9VJZ1	Q9VJZ1	CG9302	FALSE	0	-0.0801803	-0.276236	0.115876	27.3782	-0.99256	0.358011	0.520389	-6.3805	0.189827	0.0807813
Q9VJZ7	Q9VJZ7	Nnp-1	FALSE	0	0.0730176	-0.0965248	0.24256	29.326	1.04524	0.33488	0.495668	-6.32772	0.180809	0.069857
Q9VK18	Q9VK18	CG16812	FALSE	0	0.143193	-0.0729089	0.359294	27.2116	1.60817	0.157252	0.312698	-5.66534	0.114066	0.0890408
Q9VK58	Q9VK58	Pih1D1	FALSE	0	0.437881	0.280857	0.594906	28.4532	6.76797	0.000439135	0.0168628	0.503653	0.00615119	0.0646991
Q9VK59	Q9VK59	CG5787	FALSE	0	-0.0606781	-0.225429	0.104073	32.6714	-0.893866	0.404702	0.564829	-6.47395	0.206038	0.0678828
Q9VK69	Q9VK69	CCT4	FALSE	0	0.0763957	-0.190246	0.343037	27.8515	0.695361	0.511998	0.659756	-6.63817	0.240665	0.109865
Q9VK89	Q9VK89	CG6388	TRUE	2	0.164095	-0.264924	0.593114	25.1853	0.928299	0.387911	0.547638	-6.44218	0.199767	0.17677
Q9VKB4	Q9VKB4	CG6712	FALSE	0	0.106483	-0.0933113	0.306277	28.8966	1.2935	0.241867	0.402918	-6.05523	0.146976	0.0823217
Q9VKC1	Q9VKC1	RpL7-like	FALSE	0	-0.0884171	-0.260794	0.0839598	30.3167	-1.24488	0.258097	0.419067	-6.11142	0.152867	0.0710248
Q9VKD3	Q9VKD3	Nfs1	FALSE	0	-0.232323	-0.420895	-0.0437515	26.5667	-2.99009	0.0233254	0.103886	-3.74119	0.0378956	0.0776976
Q9VKD8	Q9VKD8	CG6686	FALSE	0	1.24179	0.626667	1.85692	29.6345	4.89953	0.00246295	0.0346049	-1.33652	0.0126232	0.253451
Q9VKG8	Q9VKG8	Dlg5	FALSE	0	-0.196093	-0.568651	0.176465	28.5944	-1.27743	0.247128	0.407459	-6.07394	0.148633	0.153506
Q9VKI2	Q9VKI2	CG4788	TRUE	3	-1.69033	-1.96355	-1.41711	25.3347	-15.015	4.09375e-06	0.00407631	5.03993	0.00148695	0.112576
Q9VKJ1	Q9VKJ1	CG4751	TRUE	5	-0.40928	-0.854363	0.0358028	24.6739	-2.23176	0.0656082	0.19014	-4.81097	0.0693591	0.183388
Q9VKJ6	Q9VKJ6	CG6230	FALSE	0	0.173782	-0.298837	0.646402	26.2993	0.892406	0.405426	0.564829	-6.47527	0.206038	0.194735
Q9VKK1	Q9VKK1	Ge-1	FALSE	0	-0.0113292	-0.513627	0.490968	28.3242	-0.0547403	0.958064	0.973272	-6.90399	0.355029	0.206963
Q9VKM2	Q9VKM2	SCAR	FALSE	0	-0.143189	-0.379941	0.093563	29.664	-1.46786	0.190886	0.353679	-5.84425	0.129015	0.0975495
Q9VKM7	Q9VKM7	CG33129	FALSE	0	-0.350017	-0.643514	-0.0565193	29.4423	-2.89436	0.0264817	0.112365	-3.87461	0.0409883	0.12093
Q9VKN7	Q9VKN7	aurB	FALSE	0	-0.40516	-0.846269	0.0359495	27.1239	-2.2292	0.065844	0.190464	-4.81459	0.0694773	0.181751
Q9VKU1	Q9VKU1	Fatp1	FALSE	0	-0.0875463	-0.577005	0.401912	26.247	-0.434101	0.678893	0.782868	-6.79902	0.285574	0.201673
Q9VKV5	Q9VKV5	holn1	FALSE	0	0.0493387	-0.20576	0.304438	25.9923	0.469406	0.654809	0.767777	-6.78128	0.280069	0.105109
Q9VKV8	Q9VKV8	Bug22	TRUE	5	0.0838759	-0.442621	0.610373	24.5334	0.386643	0.711923	0.811815	-6.82081	0.296133	0.216934
Q9VKW3	Q9VKW3	RfC3	FALSE	0	0.0754019	-0.13052	0.281324	28.3425	0.888684	0.407276	0.565994	-6.47865	0.206463	0.0848466
Q9VKZ0	Q9VKZ0	GATAd	FALSE	0	0.0753075	-0.174003	0.324618	25.4844	0.733106	0.490232	0.638158	-6.60956	0.232787	0.102724
Q9VKZ7	Q9VKZ7	CG4972	FALSE	0	-0.246378	-0.597143	0.104388	26.2511	-1.70472	0.137453	0.290409	-5.5384	0.105935	0.144527
Q9VL18	Q9VL18	eEF1delta	FALSE	0	-0.222153	-0.445694	0.00138795	31.2149	-2.41193	0.0510543	0.162024	-4.5558	0.0591029	0.092106
Q9VL25	Q9VL25	CG4901	FALSE	0	0.0564641	-0.140881	0.253809	28.4868	0.694408	0.512556	0.659921	-6.63888	0.240725	0.0813126
Q9VL29	Q9VL29	CG34159	TRUE	3	1.04414	-0.483971	2.57224	26.0519	1.65833	0.146647	0.301887	-5.59973	0.110122	0.629629
Q9VL70	Q9VL70	yip2	FALSE	0	-0.117983	-0.413744	0.177778	27.2734	-0.96816	0.369144	0.530408	-6.40428	0.193482	0.121863
Q9VL71	Q9VL71	Srp54	FALSE	0	0.233906	-0.0467484	0.514559	29.3707	2.02273	0.0879594	0.22346	-5.10444	0.0815135	0.115638
Q9VL72	Q9VL72	Etl1	TRUE	2	-0.131555	-0.582492	0.319382	24.897	-0.708045	0.504614	0.65353	-6.6287	0.238394	0.185801
Q9VL75	Q9VL75	Bka	FALSE	0	-0.403386	-0.805845	-0.000925804	26.7505	-2.43258	0.0496152	0.159638	-4.5265	0.0582327	0.165826
Q9VL89	Q9VL89	und	FALSE	0	0.188014	-0.362185	0.738213	26.3321	0.829352	0.437617	0.592228	-6.53095	0.216033	0.2267
Q9VL91	Q9VL91	zf30C	FALSE	0	-0.166629	-0.320143	-0.0131146	28.8336	-2.63433	0.0376027	0.135582	-4.24054	0.0494574	0.0632529
Q9VL96	Q9VL96	CG4364	FALSE	0	-0.179288	-0.347492	-0.0110843	30.976	-2.58693	0.0401186	0.14069	-4.30764	0.0513208	0.0693055
Q9VLA6	Q9VLA6	brwl	TRUE	1	0.456544	-0.725977	1.63907	25.6309	0.937006	0.38375	0.542763	-6.434	0.197989	0.487237
Q9VLD6	Q9VLD6	borr	FALSE	0	-0.336352	-0.636594	-0.0361097	27.0957	-2.71888	0.033521	0.127763	-4.12109	0.0466051	0.12371
Q9VLK1	Q9VLK1	CG13097	FALSE	0	0.206276	0.0466176	0.365935	28.5152	3.13563	0.0192788	0.0960551	-3.54008	0.0350389	0.0657845
Q9VLK8	Q9VLK8	prg	FALSE	0	0.226652	0.0427337	0.410571	26.5925	2.99091	0.0233003	0.103886	-3.74006	0.0378956	0.0757804
Q9VLL1	Q9VLL1	D12	FALSE	0	-0.0144937	-0.173938	0.144951	26.1721	-0.220617	0.832466	0.892024	-6.87785	0.325392	0.0656963
Q9VLN1	Q9VLN1	Wdr82	FALSE	0	0.039073	-0.146396	0.224542	25.4248	0.511298	0.626809	0.74808	-6.75855	0.272884	0.0764193
Q9VLP7	Q9VLP7	Mettl14	TRUE	6	-0.315769	-0.565586	-0.0659506	24.5305	-3.06771	0.0210639	0.0996499	-3.63367	0.0363502	0.102933
Q9VLT7	Q9VLT7	RpL36A	FALSE	0	0.587556	0.23365	0.941462	26.8625	4.0293	0.00641164	0.0542124	-2.36516	0.0197756	0.145821
Q9VLV5	Q9VLV5	SmE	FALSE	0	-0.545289	-1.05	-0.0405836	26.3806	-2.62215	0.0382328	0.13614	-4.25777	0.0496612	0.207955
Q9VLX0	Q9VLX0	LKRSDH	TRUE	7	-0.194996	-0.446746	0.0567531	24.3896	-1.87987	0.107524	0.25138	-5.30187	0.0916983	0.103729
Q9VLX2	Q9VLX2	CG7154	FALSE	0	0.168932	-0.0615882	0.399451	26.3109	1.77857	0.123953	0.271214	-5.43954	0.0989332	0.0949816
Q9VM17	Q9VM17	CG5181	FALSE	0	-0.138502	-0.35191	0.0749063	26.6868	-1.57512	0.164632	0.320528	-5.70812	0.116922	0.0879311
Q9VM49	Q9VM49	Caper	FALSE	0	0.100921	-0.0891011	0.290943	28.6756	1.28898	0.243337	0.404508	-6.06051	0.147556	0.0782952
Q9VM62	Q9VM62	SA	FALSE	0	0.426453	0.226297	0.626609	30.218	5.17096	0.00186774	0.0317427	-1.03932	0.0115791	0.0824708
Q9VM69	Q9VM69	nop5	FALSE	0	-0.118824	-0.290851	0.0532029	33.0047	-1.67639	0.142999	0.297222	-5.57593	0.10842	0.0708806
Q9VM72	Q9VM72	CG13773	TRUE	3	-0.200719	-0.925402	0.523965	24.9029	-0.672214	0.525655	0.670008	-6.65508	0.244405	0.298593
Q9VM75	Q9VM75	l(2)k09022	FALSE	0	0.0935863	-0.126541	0.313713	31.5377	1.03183	0.340653	0.50119	-6.34134	0.182824	0.0906994
Q9VM95	Q9VM95	Aatf	FALSE	0	-0.793529	-1.03203	-0.555028	28.8094	-8.07498	0.000161935	0.0130912	1.54446	0.00477538	0.0982701
Q9VMC8	Q9VMC8	Phf5a	FALSE	0	0.372642	0.0272982	0.717986	26.6514	2.61884	0.038406	0.136239	-4.26245	0.0496973	0.142293
Q9VMI5	Q9VMI5	CG9135	FALSE	0	-0.22037	-0.440455	-0.000284955	25.5306	-2.43014	0.049783	0.159638	-4.52996	0.0582327	0.0906821
Q9VMJ1	Q9VMJ1	CG9107	FALSE	0	-0.379274	-0.620738	-0.137809	27.6011	-3.81213	0.00828496	0.0614768	-2.64011	0.0224255	0.0994913
Q9VMM3	Q9VMM3	CG7239	FALSE	0	0.129711	-0.10575	0.365172	29.4393	1.33698	0.228122	0.389708	-6.00395	0.142158	0.0970176
Q9VMM7	Q9VMM7	CG11030	FALSE	0	-0.37101	-0.556508	-0.185511	28.764	-4.85415	0.00258202	0.0346049	-1.38728	0.0126232	0.0764314
Q9VMV5	Q9VMV5	vkg	FALSE	0	-0.371629	-0.625228	-0.118029	32.1738	-3.55655	0.0113063	0.0737309	-2.97271	0.0268955	0.104491
Q9VMX3	Q9VMX3	CG3756	FALSE	0	-0.730629	-0.89662	-0.564638	28.1052	-10.6827	3.15966e-05	0.00539248	3.18051	0.00196707	0.0683937
Q9VN21	Q9VN21	lost	FALSE	0	0.0781089	-0.159391	0.315609	30.6106	0.798189	0.454194	0.610361	-6.55727	0.222647	0.0978576
Q9VN25	Q9VN25	eIF3a	FALSE	0	0.396028	0.119172	0.672885	28.5699	3.47169	0.0125637	0.0771913	-3.08523	0.0281578	0.114074
Q9VN31	Q9VN31	Fip1	FALSE	0	0.200492	-0.139739	0.540724	27.951	1.43018	0.200993	0.363444	-5.891	0.132577	0.140186
Q9VN39	Q9VN39	CG9775	FALSE	0	1.37793	1.12931	1.62655	29.2911	13.451	7.96154e-06	0.00407631	4.46298	0.00148695	0.102441
Q9VN44	Q9VN44	Karybeta3	FALSE	0	-0.0171454	-1.10366	1.06937	25.5366	-0.0382984	0.970651	0.980224	-6.90487	0.357565	0.447679
Q9VN50	Q9VN50	eIF3f1	FALSE	0	-0.167912	-0.471661	0.135838	26.5438	-1.34164	0.226693	0.388616	-5.99841	0.141759	0.125155
Q9VN55	Q9VN55	atms	FALSE	0	0.249437	-0.035931	0.534804	27.2143	2.12141	0.0765761	0.207079	-4.96642	0.0755381	0.117581
Q9VN88	Q9VN88	Vps37B	TRUE	5	0.583649	0.206573	0.960726	24.6714	3.75657	0.00885679	0.063756	-2.7116	0.0232569	0.155368
Q9VNA3	Q9VNA3	CG11999	FALSE	0	0.774308	0.302304	1.24631	30.0782	3.98141	0.00678032	0.0552173	-2.42517	0.0201421	0.194481
Q9VNB9	Q9VNB9	RpL35A	FALSE	0	0.0580272	-0.139251	0.255306	29.7505	0.713872	0.501244	0.650263	-6.6243	0.237203	0.0812851
Q9VND7	Q9VND7	CG2931	FALSE	0	0.0138663	-0.323934	0.351666	25.474	0.0996253	0.92378	0.948315	-6.90001	0.345926	0.139185
Q9VNE0	Q9VNE0	CG2926	FALSE	0	0.222362	0.0624107	0.382313	28.2457	3.37397	0.0142048	0.0817174	-3.21599	0.0298088	0.065905
Q9VNE9	Q9VNE9	RpL13A	FALSE	0	0.271484	0.0972582	0.445711	31.5554	3.78181	0.00859172	0.0625444	-2.67906	0.0228149	0.0717868
Q9VNF7	Q9VNF7	MTA1-like	FALSE	0	0.123493	-0.102974	0.34996	28.6555	1.32344	0.232325	0.393441	-6.02002	0.143519	0.0933117
Q9VNG0	Q9VNG0	MED27	TRUE	5	-0.25481	-0.695368	0.185748	24.6077	-1.40372	0.208381	0.372178	-5.92347	0.135763	0.181524
Q9VNG2	Q9VNG2	Wdr33	FALSE	0	0.103895	-0.186492	0.394282	26.4391	0.868335	0.417501	0.574388	-6.49691	0.209525	0.119649
Q9VNH6	Q9VNH6	Sec8	TRUE	1	0.189518	-0.143127	0.522164	24.9632	1.38273	0.214417	0.377256	-5.949	0.137615	0.137061
Q9VNI5	Q9VNI5	CG10979	TRUE	4	0.18435	-0.286806	0.655506	24.3104	0.949614	0.377786	0.537794	-6.42206	0.196176	0.194132
Q9VNI8	Q9VNI8	Hpr1	FALSE	0	0.493243	0.121941	0.864546	27.008	3.22405	0.0171969	0.0904605	-3.41905	0.0329981	0.152989
Q9VNP3	Q9VNP3	Mes2	FALSE	0	0.0443214	-0.158632	0.247275	29.043	0.530011	0.614513	0.736839	-6.74782	0.268784	0.0836235
Q9VNV3	Q9VNV3	Ddx1	FALSE	0	-0.26815	-0.605271	0.0689704	26.8794	-1.93046	0.100142	0.24253	-5.23233	0.08847	0.138905
Q9VNX8	Q9VNX8	CG7414	FALSE	0	0.0502315	-0.185796	0.286259	26.4368	0.516514	0.623368	0.745131	-6.7556	0.271808	0.0972509
Q9VNZ3	Q9VNZ3	Rpb8	FALSE	0	-0.482776	-1.05042	0.0848721	27.256	-2.06412	0.0829896	0.218287	-5.04668	0.0796267	0.233889
Q9VP47	Q9VP47	Tsr1	FALSE	0	0.00146391	-0.193912	0.19684	25.6723	0.018185	0.986062	0.988764	-6.90552	0.360681	0.0805013
Q9VP57	Q9VP57	pzg	FALSE	0	-0.167904	-0.364521	0.0287134	30.9507	-2.07256	0.0820112	0.216815	-5.03488	0.0790895	0.0810126
Q9VP77	Q9VP77	CG10565	FALSE	0	0.223434	-0.0515253	0.498393	26.1907	1.97219	0.0944359	0.232458	-5.17465	0.0847958	0.113292
Q9VPB8	Q9VPB8	Pex14	TRUE	2	0.0403107	-0.988209	1.06883	25.8322	0.0951209	0.927214	0.950101	-6.90052	0.346577	0.423783
Q9VPC0	Q9VPC0	Pitslre	FALSE	0	0.158583	-0.0223102	0.339477	28.1354	2.12766	0.0759069	0.206482	-4.95763	0.0753203	0.074534
Q9VPH2	Q9VPH2	DNApol-alpha60	FALSE	0	0.715774	0.339197	1.09235	27.8795	4.61308	0.00333413	0.0403246	-1.6622	0.0147096	0.155162
Q9VPH4	Q9VPH4	kin17	TRUE	6	-0.425832	-0.76979	-0.0818738	24.5887	-3.0047	0.0228805	0.103886	-3.72091	0.0378956	0.141722
Q9VPH8	Q9VPH8	Rbbp5	FALSE	0	-0.364775	-0.597971	-0.13158	26.5592	-3.79641	0.00844245	0.0617505	-2.66028	0.0225253	0.0960842
Q9VPJ9	Q9VPJ9	CG3164	TRUE	1	0.169354	-0.438265	0.776972	25.4347	0.676445	0.523141	0.668507	-6.65203	0.243857	0.250358
Q9VPK4	Q9VPK4	CG11454	TRUE	1	0.197055	-0.23494	0.62905	24.26	1.10708	0.309291	0.472707	-6.26337	0.172434	0.177996
Q9VPL0	Q9VPL0	CG3436	FALSE	0	0.147879	-0.0863792	0.382138	28.1483	1.53208	0.174734	0.330858	-5.76327	0.12069	0.0965221
Q9VPM5	Q9VPM5	mbm	FALSE	0	-0.319046	-0.548001	-0.0900918	27.1993	-3.382	0.0140616	0.0811977	-3.20521	0.0296192	0.0943367
Q9VPM7	Q9VPM7	CG17078	FALSE	0	-0.166865	-0.36528	0.0315496	26.8465	-2.04108	0.0857199	0.220614	-5.07886	0.0804755	0.0817533
Q9VPQ2	Q9VPQ2	shv	FALSE	0	-0.042509	-0.389494	0.304476	30.4449	-0.29733	0.775911	0.853113	-6.85526	0.311198	0.142969
Q9VPQ7	Q9VPQ7	Spp	FALSE	0	0.290845	-0.0809726	0.662664	28.3014	1.89846	0.104751	0.249068	-5.27637	0.0908547	0.153201
Q9VPR4	Q9VPR4	Nle	TRUE	2	-0.090469	-0.368574	0.187636	24.9216	-0.789514	0.458888	0.614177	-6.56445	0.224039	0.114588
Q9VPR5	Q9VPR5	Sf3b1	FALSE	0	-0.0539019	-0.307544	0.19974	30.1493	-0.515765	0.623862	0.745141	-6.75602	0.271812	0.104509
Q9VPT8	Q9VPT8	Clp	TRUE	3	-0.668998	-2.07755	0.739555	25.3916	-1.15271	0.291462	0.454965	-6.21431	0.165962	0.580369
Q9VPU4	Q9VPU4	CG4291	TRUE	2	-0.0375309	-0.54938	0.474318	24.2343	-0.177957	0.86442	0.910041	-6.88756	0.331964	0.210898
Q9VPU7	Q9VPU7	aru	TRUE	3	-0.129465	-0.632637	0.373706	24.8766	-0.624461	0.55456	0.691374	-6.68839	0.252199	0.207323
Q9VPU8	Q9VPU8	dbe	FALSE	0	-0.0179917	-0.267651	0.231667	27.0962	-0.174901	0.866721	0.911214	-6.88817	0.332392	0.102868
Q9VPY0	Q9VPY0	IntS14	FALSE	0	0.305048	-0.057992	0.668089	28.2817	2.03931	0.0859341	0.220614	-5.08134	0.0804755	0.149584
Q9VPY4	Q9VPY4	CG4887	FALSE	0	0.643072	-0.175689	1.46183	26.5175	1.90621	0.103615	0.247517	-5.26571	0.0902889	0.337356
Q9VQ27	Q9VQ27	CG14352	TRUE	3	-0.763825	-2.21313	0.685479	25.5856	-1.2791	0.246578	0.407459	-6.072	0.148633	0.59716
Q9VQ30	Q9VQ30	chinmo	FALSE	0	0.0222461	-0.329851	0.374344	26.0163	0.153341	0.882991	0.921851	-6.89222	0.336272	0.145076
Q9VQ58	Q9VQ58	CG15356	FALSE	0	0.111027	-0.049973	0.272026	27.4876	1.67368	0.143543	0.297949	-5.57952	0.108686	0.0663371
Q9VQ76	Q9VQ76	tho2	FALSE	0	0.186902	-0.0282877	0.402092	29.1674	2.10795	0.0780356	0.210285	-4.9853	0.0767078	0.0886652
Q9VQ77	Q9VQ77	CG11723	FALSE	0	-0.303833	-0.481844	-0.125822	24.7948	-4.14244	0.00562613	0.0508924	-2.22479	0.0185645	0.0733464
Q9VQ94	Q9VQ94	Sec24CD	TRUE	4	0.596716	-0.552159	1.74559	24.7616	1.26056	0.252761	0.413022	-6.09343	0.150662	0.473374
Q9VQD8	Q9VQD8	Arpc5	FALSE	0	0.385245	0.120523	0.649966	25.8605	3.53196	0.0116557	0.0744833	-3.00521	0.02717	0.109074
Q9VQF5	Q9VQF5	Cwc25	TRUE	2	0.686164	0.341941	1.03039	25.1332	4.8379	0.00262623	0.0346049	-1.40553	0.0126232	0.141831
Q9VQI6	Q9VQI6	CG8814	TRUE	1	0.448613	-0.449475	1.3467	25.3163	1.21233	0.269483	0.430723	-6.1483	0.157119	0.370041
Q9VQJ6	Q9VQJ6	CG9641	FALSE	0	-0.192128	-0.458902	0.0746459	27.0118	-1.7479	0.129396	0.279147	-5.48077	0.101827	0.10992
Q9VQK5	Q9VQK5	CG3542	FALSE	0	0.0938796	-0.111389	0.299148	27.8029	1.10999	0.308127	0.471398	-6.26028	0.171956	0.0845771
Q9VQK7	Q9VQK7	Sf3b2	FALSE	0	0.162702	-0.0204612	0.345865	27.9499	2.15587	0.0729627	0.201916	-4.91798	0.0736549	0.0754691
Q9VQM4	Q9VQM4	gkt	TRUE	5	-0.509225	-0.996054	-0.0223966	24.0477	-2.53865	0.0428646	0.146637	-4.37605	0.0534901	0.200589
Q9VQR8	Q9VQR8	LeuRS	FALSE	0	-0.0696263	-0.297144	0.157892	28.3204	-0.742722	0.484788	0.636209	-6.60206	0.232076	0.0937448
Q9VQR9	Q9VQR9	CG17593	FALSE	0	0.0929665	-0.306101	0.492034	25.9384	0.565391	0.591635	0.720659	-6.72659	0.262882	0.164429
Q9VQZ8	Q9VQZ8	CG15439	FALSE	0	0.229102	-0.048132	0.506335	25.5825	2.00563	0.0900993	0.227246	-5.12824	0.0828945	0.114229
Q9VR56	Q9VR56	CG14618	TRUE	4	-0.842021	-1.61574	-0.0682989	25.2008	-2.64123	0.0372505	0.135554	-4.23077	0.0494473	0.318798
Q9VR89	Q9VR89	l(1)G0004	FALSE	0	-0.194672	-0.446615	0.057272	27.0958	-1.87529	0.108218	0.252216	-5.30813	0.0920032	0.103809
Q9VR99	Q9VR99	cactin	FALSE	0	0.268952	0.0791982	0.458705	27.3372	3.43996	0.0130726	0.0790989	-3.12754	0.0288536	0.0781845
Q9VRG7	Q9VRG7	Dd	TRUE	1	-0.116168	-0.457141	0.224806	25.0486	-0.826862	0.438925	0.593476	-6.53308	0.216488	0.140492
Q9VRI0	Q9VRI0	Hlc	FALSE	0	0.122469	-0.0815236	0.326462	28.8422	1.45707	0.193731	0.355946	-5.8577	0.129842	0.0840516
Q9VRJ2	Q9VRJ2	Fitm	TRUE	6	0.73718	0.0530634	1.4213	24.1888	2.61524	0.038595	0.136594	-4.26754	0.0498268	0.281878
Q9VRJ4	Q9VRJ4	CG10672	FALSE	0	-0.556408	-0.827932	-0.284883	25.6633	-4.9734	0.0022821	0.0340026	-1.25455	0.0124034	0.111877
Q9VRJ7	Q9VRJ7	CG4611	TRUE	5	0.39022	-0.0516301	0.83207	24.5297	2.1434	0.0742499	0.203294	-4.93552	0.0741574	0.182056
Q9VRL0	Q9VRL0	Cyt-c1	FALSE	0	-0.905114	-1.24957	-0.560657	26.3427	-6.37731	0.000609771	0.0195127	0.156383	0.00711782	0.141927
Q9VRL8	Q9VRL8	blanks	FALSE	0	-0.323363	-0.547337	-0.0993897	30.0713	-3.50399	0.0120678	0.0754547	-3.04228	0.0275243	0.0922844
Q9VRM6	Q9VRM6	l(3)psg2	FALSE	0	0.237809	0.0728629	0.402754	25.8867	3.49909	0.0121416	0.0755042	-3.04878	0.0275424	0.067963
Q9VRP2	Q9VRP2	CG10576	TRUE	3	-0.3966	-0.757345	-0.0358563	24.6012	-2.66823	0.0359064	0.133847	-4.19261	0.0488247	0.148638
Q9VRP5	Q9VRP5	scny	FALSE	0	-0.209862	-0.401159	-0.0185643	28.7686	-2.66252	0.0361862	0.134098	-4.20068	0.0489164	0.0788208
Q9VRQ2	Q9VRQ2	mad2	FALSE	0	-0.71311	-0.912858	-0.513362	26.7683	-8.6645	0.00010788	0.0117274	1.96032	0.0042779	0.0823025
Q9VRV4	Q9VRV4	D19B	FALSE	0	-0.238646	-0.455837	-0.021456	27.77	-2.66675	0.0359784	0.133847	-4.19469	0.0488247	0.0894895
Q9VRV5	Q9VRV5	D19A	FALSE	0	-0.0563053	-0.261499	0.148889	28.6274	-0.665969	0.52938	0.670898	-6.65956	0.24473	0.0845465
Q9VRV7	Q9VRV7	Sf3b6	FALSE	0	-0.368854	-0.898533	0.160825	26.3845	-1.69009	0.140291	0.29318	-5.55781	0.106946	0.218245
Q9VRX7	Q9VRX7	Rexo5	FALSE	0	0.243495	-0.153114	0.640104	27.0198	1.49003	0.185158	0.345569	-5.81647	0.126056	0.163416
Q9VRY4	Q9VRY4	velo	TRUE	1	-0.124639	-0.948935	0.699656	25.8805	-0.366979	0.725817	0.820349	-6.82914	0.299246	0.339636
Q9VS37	Q9VS37	Cdc27	FALSE	0	1.04899	0.452034	1.64595	27.6799	4.26478	0.00489529	0.0480354	-2.07524	0.0175223	0.245967
Q9VS38	Q9VS38	MED4	TRUE	5	-0.0225001	-0.313455	0.268454	24.3671	-0.187685	0.857107	0.907942	-6.88552	0.331199	0.119883
Q9VS55	Q9VS55	CTCF	FALSE	0	-0.0250395	-0.196398	0.146318	26.7669	-0.354642	0.734591	0.82574	-6.83415	0.301213	0.070605
Q9VS57	Q9VS57	Sec63	TRUE	5	0.589079	-0.076137	1.25429	24.7356	2.14921	0.0736472	0.202728	-4.92735	0.0739509	0.27409
Q9VSD6	Q9VSD6	msk	TRUE	3	0.795354	0.1875	1.40321	25.0771	3.17563	0.018305	0.0935806	-3.48522	0.0341363	0.250456
Q9VSF2	Q9VSF2	MED24	FALSE	0	0.136985	-0.0787252	0.352695	24.6552	1.54124	0.172536	0.327988	-5.75158	0.119643	0.0888795
Q9VSL9	Q9VSL9	CG6638	TRUE	5	0.212181	-0.200534	0.624895	24.5122	1.24774	0.257114	0.418356	-6.10814	0.152608	0.170052
Q9VSN9	Q9VSN9	SrpRbeta	FALSE	0	-0.529614	-0.945659	-0.11357	25.9145	-3.0895	0.0204724	0.0986258	-3.60359	0.0359766	0.171424
Q9VSS2	Q9VSS2	Srp68	TRUE	2	-0.0146425	-1.49759	1.4683	25.2343	-0.0239639	0.981633	0.986127	-6.90538	0.359719	0.611022
Q9VSW5	Q9VSW5	Klp67A	FALSE	0	0.44116	0.230481	0.65184	27.7701	5.08209	0.00204259	0.032858	-1.13542	0.0119859	0.0868068
Q9VT00	Q9VT00	Jarid2	FALSE	0	-0.284172	-0.865387	0.297042	25.062	-1.18663	0.278779	0.44054	-6.17702	0.1607	0.239479
Q9VT19	Q9VT19	CG3335	FALSE	0	0.357094	-0.041992	0.75618	26.7795	2.17162	0.0713698	0.198955	-4.8958	0.0725745	0.164436
Q9VT32	Q9VT32	Prps	FALSE	0	-0.354837	-0.532163	-0.177511	26.5661	-4.85651	0.00257568	0.0346049	-1.38463	0.0126232	0.0730642
Q9VT38	Q9VT38	CG18178	FALSE	0	0.118936	-0.0623382	0.300211	26.347	1.59238	0.160738	0.315721	-5.68583	0.115169	0.0746909
Q9VT41	Q9VT41	defl	FALSE	0	0.411766	0.0653338	0.758198	26.1258	2.8847	0.026825	0.112987	-3.88812	0.0412152	0.142741
Q9VT57	Q9VT57	Cdk8	FALSE	0	-0.184653	-0.457711	0.0884053	25.0189	-1.64123	0.150184	0.306351	-5.62219	0.11175	0.112509
Q9VT61	Q9VT61	CG8108	FALSE	0	0.0655729	-0.170357	0.301503	30.9468	0.674543	0.52427	0.669392	-6.6534	0.244181	0.0972107
Q9VTC1	Q9VTC1	CG6418	FALSE	0	-0.327329	-0.513721	-0.140938	28.7739	-4.26214	0.00490987	0.0480354	-2.07844	0.0175223	0.0767992
Q9VTE6	Q9VTE6	CG7839	FALSE	0	0.0465241	-0.121799	0.214848	30.3377	0.670813	0.526489	0.670008	-6.65609	0.244405	0.0693547
Q9VTH2	Q9VTH2	CG42671	FALSE	0	-0.0139887	-0.605181	0.577204	26.3073	-0.0574271	0.956008	0.971826	-6.90382	0.354502	0.24359
Q9VTL1	Q9VTL1	PCID2	TRUE	1	-0.42741	-1.13832	0.283501	25.7796	-1.45914	0.193181	0.355946	-5.85512	0.129842	0.292918
Q9VTP4	Q9VTP4	RpL10Ab	FALSE	0	0.0714543	-0.157678	0.300586	30.5434	0.756853	0.476862	0.629261	-6.5909	0.229542	0.0944097
Q9VTT2	Q9VTT2	vers	FALSE	0	-0.170048	-0.343981	0.00388594	27.318	-2.37277	0.0539036	0.168203	-4.61133	0.0613571	0.0716662
Q9VTT3	Q9VTT3	ssp	FALSE	0	-0.110634	-0.30745	0.0861826	26.1063	-1.36425	0.21986	0.381446	-5.97131	0.139144	0.0810947
Q9VTU0	Q9VTU0	CG5645	FALSE	0	-0.116663	-0.533766	0.30044	26.5076	-0.678826	0.52173	0.667259	-6.6503	0.243402	0.17186
Q9VTU4	Q9VTU4	eIF3l	FALSE	0	0.171206	-0.0612147	0.403628	28.9014	1.78778	0.122364	0.268536	-5.42712	0.0979563	0.095765
Q9VTZ0	Q9VTZ0	tral	FALSE	0	-0.112271	-0.332778	0.108237	28.7024	-1.2357	0.261265	0.421537	-6.12188	0.153768	0.0908562
Q9VTZ1	Q9VTZ1	Gcn5	TRUE	1	-0.197558	-0.435312	0.0401948	24.9998	-2.01668	0.0887102	0.22485	-5.11286	0.0820205	0.097962
Q9VU02	Q9VU02	SmD1	FALSE	0	0.441901	0.0642981	0.819505	28.6351	2.84026	0.0284662	0.114761	-3.95036	0.0418626	0.155585
Q9VU15	Q9VU15	Sf3a2	FALSE	0	-0.0803568	-0.332376	0.171663	25.6246	-0.77385	0.467448	0.622184	-6.57725	0.22696	0.10384
Q9VU43	Q9VU43	Srrm1	FALSE	0	0.420785	0.228133	0.613437	28.3567	5.30097	0.00164159	0.031123	-0.900807	0.011353	0.0793789
Q9VU65	Q9VU65	Poc1	TRUE	5	-0.065062	-0.63125	0.501126	24.6715	-0.278891	0.789384	0.861146	-6.86128	0.314128	0.233288
Q9VUB5	Q9VUB5	upSET	FALSE	0	0.206369	0.0328257	0.379911	27.9055	2.88606	0.0267764	0.112987	-3.88622	0.0412152	0.0715052
Q9VUB7	Q9VUB7	Ptip	TRUE	1	-0.305672	-0.818732	0.207387	25.2421	-1.44596	0.196701	0.360111	-5.87149	0.131361	0.211397
Q9VUC3	Q9VUC3	CG6833	FALSE	0	0.134453	-0.173381	0.442287	26.5064	1.06004	0.328605	0.490989	-6.31255	0.179103	0.126838
Q9VUC6	Q9VUC6	Frl	FALSE	0	0.16471	-0.285762	0.615183	25.9505	0.887404	0.407913	0.565994	-6.47981	0.206463	0.185609
Q9VUE5	Q9VUE5	stwl	FALSE	0	0.285531	0.0938781	0.477184	29.5947	3.61582	0.0105104	0.0695862	-2.89474	0.0253836	0.0789671
Q9VUH8	Q9VUH8	Tdrd3	TRUE	6	0.0975747	-0.324678	0.519827	24.3796	0.560834	0.594554	0.721355	-6.72939	0.263135	0.173982
Q9VUM1	Q9VUM1	Prp31	FALSE	0	-0.0817329	-0.255001	0.0915348	27.097	-1.14485	0.294471	0.458264	-6.22285	0.167165	0.0713919
Q9VUN7	Q9VUN7	CG7275	FALSE	0	0.102888	-0.133931	0.339706	28.8985	1.05443	0.330974	0.492612	-6.31832	0.179695	0.0975768
Q9VUQ5	Q9VUQ5	AGO2	FALSE	0	-0.27848	-0.445938	-0.111022	29.7626	-4.03606	0.00636145	0.0542124	-2.35672	0.0197756	0.068998
Q9VUR2	Q9VUR2	CG12301	FALSE	0	-0.131862	-0.300881	0.0371577	30.4407	-1.89344	0.105493	0.249671	-5.28326	0.091075	0.0696414
Q9VUV9	Q9VUV9	l(3)72Ab	FALSE	0	0.289493	0.132704	0.446282	31.8849	4.48117	0.00384813	0.0434709	-1.81641	0.0158573	0.0646021
Q9VUZ0	Q9VUZ0	SsRbeta	TRUE	3	-1.3394	-2.44977	-0.229023	26.0013	-2.92758	0.0253373	0.109629	-3.82822	0.0399903	0.457509
Q9VUZ6	Q9VUZ6	l(3)72Dn	FALSE	0	0.150292	-0.0493719	0.349957	28.4814	1.82686	0.115835	0.261266	-5.37418	0.0953043	0.0822681
Q9VV52	Q9VV52	RAF2	FALSE	0	0.0434907	-0.126239	0.21322	31.5703	0.621882	0.556148	0.691696	-6.69013	0.252316	0.069934
Q9VV75	Q9VV75	UQCR-C2	FALSE	0	-0.475507	-0.722987	-0.228027	28.0231	-4.66322	0.00315935	0.0391352	-1.60428	0.0142757	0.10197
Q9VVA7	Q9VVA7	TSG101	TRUE	3	-0.31758	-0.694335	0.0591737	24.804	-2.04581	0.0851528	0.220156	-5.07227	0.0803083	0.155235
Q9VVA9	Q9VVA9	Zcchc7	FALSE	0	-0.0593066	-0.319234	0.200621	26.7639	-0.553758	0.599103	0.723281	-6.73371	0.263838	0.107098
Q9VVC5	Q9VVC5	Nc73EF	FALSE	0	0.0205102	-0.210832	0.251853	25.576	0.215171	0.836527	0.894555	-6.8792	0.326315	0.0953207
Q9VVC9	Q9VVC9	CG7728	FALSE	0	0.0318557	-0.129633	0.193345	29.9972	0.478754	0.648506	0.76447	-6.77636	0.278863	0.0665387
Q9VVG4	Q9VVG4	Sec3	TRUE	3	0.126559	-0.39961	0.652728	24.7206	0.583763	0.579951	0.712644	-6.71507	0.259958	0.216799
Q9VVH5	Q9VVH5	UQCR-Q	FALSE	0	1.17161	0.685454	1.65777	28.4691	5.84892	0.00097512	0.0243634	-0.343298	0.00888726	0.200312
Q9VVI0	Q9VVI0	U4-U6-60K	FALSE	0	-0.581011	-0.82938	-0.332642	28.3442	-5.67748	0.00114326	0.0258242	-0.513275	0.00942014	0.102336
Q9VVI1	Q9VVI1	CG7564	FALSE	0	0.203322	0.0155361	0.391109	27.7306	2.62779	0.0379399	0.13614	-4.24979	0.0496612	0.0773741
Q9VVI2	Q9VVI2	Edc3	TRUE	1	-0.260196	-0.65609	0.135698	25.4538	-1.59511	0.160131	0.31493	-5.68229	0.11488	0.163121
Q9VVK8	Q9VVK8	CG5589	FALSE	0	0.324612	0.0600004	0.589224	27.1248	2.97731	0.0237223	0.104925	-3.75896	0.0382746	0.109029
Q9VVL8	Q9VVL8	TrpRS-m	TRUE	1	-0.426834	-1.05604	0.202373	25.3715	-1.6464	0.149107	0.304965	-5.61542	0.111245	0.259254
Q9VVU2	Q9VVU2	RpL26	FALSE	0	-0.217196	-0.427635	-0.00675697	28.8869	-2.50492	0.0448997	0.149926	-4.42387	0.0546899	0.0867077
Q9VVU6	Q9VVU6	CG6841	FALSE	0	-0.101824	-0.280524	0.076875	29.0718	-1.38292	0.214362	0.377256	-5.94877	0.137615	0.07363
Q9VVV7	Q9VVV7	CG3808	TRUE	4	-0.336787	-0.594505	-0.0790698	24.7132	-3.17162	0.0184002	0.0935853	-3.49072	0.034138	0.106188
Q9VW10	Q9VW10	CG9300	FALSE	0	-0.150784	-0.324921	0.0233525	29.6367	-2.10152	0.0787432	0.211519	-4.99432	0.0771577	0.0717499
Q9VW37	Q9VW37	SREBP	TRUE	2	0.551703	-0.263527	1.36693	25.1817	1.64246	0.149928	0.306235	-5.62058	0.111708	0.335901
Q9VW47	Q9VW47	kto	FALSE	0	-0.0486072	-0.364381	0.267167	26.6279	-0.373588	0.721134	0.818414	-6.82639	0.298541	0.130109
Q9VW52	Q9VW52	Prp3	FALSE	0	0.345841	0.0952332	0.59645	26.2479	3.34927	0.0146559	0.0834681	-3.24925	0.0304474	0.103259
Q9VW53	Q9VW53	Mtr3	FALSE	0	0.0313948	-0.229897	0.292687	27.6612	0.291608	0.780083	0.855863	-6.85717	0.312201	0.107661
Q9VW54	Q9VW54	Rpn1	TRUE	7	0.66073	0.28269	1.03877	24.7137	4.24185	0.00502379	0.0482283	-2.10309	0.0175927	0.155765
Q9VWA8	Q9VWA8	FRG1	TRUE	3	0.392711	-0.198052	0.983474	24.7586	1.61335	0.156124	0.311841	-5.6586	0.113753	0.243413
Q9VWC7	Q9VWC7	CG12702	FALSE	0	0.284696	0.0379087	0.531482	28.5972	2.7998	0.0300542	0.118152	-4.00716	0.0430992	0.101684
Q9VWD0	Q9VWD0	parvin	TRUE	1	-0.290497	-0.570027	-0.0109674	24.8766	-2.52222	0.0438437	0.148008	-4.39935	0.0539904	0.115175
Q9VWD4	Q9VWD4	CG14230	FALSE	0	0.359279	0.0551968	0.663362	27.7394	2.86754	0.0274464	0.112987	-3.91214	0.0412152	0.125292
Q9VWG1	Q9VWG1	CG14207	TRUE	7	-0.990271	-2.05588	0.0753378	24.8976	-2.25541	0.0634761	0.186347	-4.77755	0.0679757	0.439065
Q9VWG2	Q9VWG2	CG14220	FALSE	0	0.637386	0.267867	1.0069	27.0724	4.18635	0.00535069	0.0501138	-2.17085	0.0182805	0.152253
Q9VWI1	Q9VWI1	pcm	TRUE	3	0.0683058	-0.610415	0.747026	24.7747	0.244251	0.814907	0.882099	-6.87159	0.321771	0.279655
Q9VWK5	Q9VWK5	Ulp1	FALSE	0	0.148271	-0.0682679	0.36481	29.6776	1.66184	0.145932	0.300875	-5.59512	0.109753	0.0892211
Q9VWL4	Q9VWL4	CG7556	FALSE	0	0.128155	-0.195814	0.452124	27.9426	0.960063	0.372898	0.533518	-6.41207	0.194616	0.133486
Q9VWN4	Q9VWN4	Flacc	FALSE	0	0.115951	-0.161203	0.393105	26.8917	1.01536	0.347847	0.509335	-6.35789	0.185795	0.114196
Q9VWP1	Q9VWP1	Usp39	FALSE	0	-0.154188	-0.343681	0.035306	25.9663	-1.9748	0.0940903	0.231979	-5.17103	0.084621	0.0780775
Q9VWP5	Q9VWP5	htk	FALSE	0	0.0877034	-0.107266	0.282672	29.0844	1.09174	0.315483	0.477891	-6.27957	0.174325	0.0803335
Q9VWQ6	Q9VWQ6	CG18259	FALSE	0	0.393563	0.194003	0.593123	27.3064	4.78641	0.00277205	0.0349005	-1.46363	0.012731	0.0822251
Q9VWS2	Q9VWS2	Nup35	FALSE	0	-0.307759	-0.533065	-0.0824534	28.5289	-3.31518	0.0153044	0.0854598	-3.29528	0.031174	0.0928332
Q9VWY6	Q9VWY6	Taf8	FALSE	0	-0.227283	-0.471501	0.0169359	25.6971	-2.25869	0.0631859	0.186045	-4.77292	0.0678655	0.100626
Q9VWZ1	Q9VWZ1	Ada3	TRUE	7	0.336595	-0.115402	0.788592	24.3591	1.80734	0.119051	0.264836	-5.40066	0.0966065	0.186237
Q9VX09	Q9VX09	Arp8	FALSE	0	0.0450608	-0.30078	0.390901	25.0963	0.316222	0.762194	0.843466	-6.8487	0.307679	0.142497
Q9VX15	Q9VX15	CG8142	FALSE	0	-0.231509	-0.460125	-0.00289349	27.4468	-2.45771	0.0479207	0.157278	-4.49084	0.0573718	0.0941971
Q9VX31	Q9VX31	IntS2	FALSE	0	0.288812	0.0827432	0.49488	26.6572	3.40151	0.0137197	0.0807414	-3.17901	0.0294528	0.0849068
Q9VX32	Q9VX32	RhoGAPp190	TRUE	5	-0.0389916	-0.280105	0.202121	24.3296	-0.392481	0.707821	0.807736	-6.81826	0.294646	0.0993463
Q9VX34	Q9VX34	CG5800	FALSE	0	-0.0156742	-0.217683	0.186334	28.5958	-0.188315	0.856633	0.907942	-6.88539	0.331199	0.0832341
Q9VX38	Q9VX38	CG8326	TRUE	4	0.0322003	-0.494171	0.558572	24.4644	0.148469	0.886677	0.923346	-6.89306	0.336818	0.216882
Q9VXE6	Q9VXE6	Nup153	FALSE	0	0.18137	-0.0414202	0.404161	30.421	1.97578	0.0939612	0.231979	-5.16968	0.084621	0.0917969
Q9VXE9	Q9VXE9	SMC3	FALSE	0	0.374809	0.190904	0.558715	28.9374	4.94634	0.00234653	0.0340026	-1.28447	0.0124034	0.075775
Q9VXG1	Q9VXG1	hang	FALSE	0	-0.10896	-0.298015	0.0800959	27.5488	-1.39877	0.209792	0.372964	-5.92952	0.13605	0.077897
Q9VXK5	Q9VXK5	CG8939	FALSE	0	0.0463695	-0.120803	0.213542	30.6658	0.673189	0.525075	0.669863	-6.65438	0.244352	0.0688803
Q9VXL4	Q9VXL4	Rrp47	TRUE	1	-0.619848	-1.04302	-0.196675	25.1884	-3.55497	0.0113284	0.0737309	-2.9748	0.0268955	0.174361
Q9VXN4	Q9VXN4	ArgRS	FALSE	0	0.032522	-0.240195	0.305239	28.3681	0.289424	0.781678	0.856389	-6.85789	0.312393	0.112368
Q9VXQ2	Q9VXQ2	Graf	FALSE	0	0.0459308	-0.188321	0.280183	24.8815	0.475871	0.650446	0.76617	-6.77789	0.279483	0.0965193
Q9VXQ5	Q9VXQ5	CCT6	FALSE	0	0.0680794	-0.6144	0.750559	25.7903	0.2421	0.816501	0.883201	-6.87218	0.322173	0.281204
Q9VXR5	Q9VXR5	CG9281	FALSE	0	-0.0158327	-0.231055	0.199389	26.7913	-0.178541	0.863981	0.910041	-6.88744	0.331964	0.0886784
Q9VXW2	Q9VXW2	CG6227	TRUE	6	0.391826	0.0192051	0.764447	24.5717	2.55208	0.0420811	0.144925	-4.35701	0.0528656	0.153532
Q9VXW3	Q9VXW3	CG12608	FALSE	0	-0.211591	-0.461254	0.0380722	26.6498	-2.05689	0.0838368	0.218287	-5.05679	0.0796267	0.102869
Q9VXW9	Q9VXW9	CG5877	FALSE	0	0.371948	0.109633	0.634263	26.5331	3.44134	0.0130499	0.0790989	-3.12569	0.0288536	0.108082
Q9VY44	Q9VY44	mRNA-cap	FALSE	0	-0.081412	-0.511437	0.348613	25.2231	-0.459477	0.661538	0.771544	-6.7864	0.281443	0.177184
Q9VY54	Q9VY54	l(1)G0007	TRUE	7	0.320732	0.0944154	0.547048	24.5841	3.4395	0.0130802	0.0790989	-3.12816	0.0288536	0.0932496
Q9VY97	Q9VY97	mus101	TRUE	5	0.154063	-0.565742	0.873868	24.829	0.519461	0.621429	0.744551	-6.75392	0.271597	0.296583
Q9VYE3	Q9VYE3	CG15747	TRUE	6	-1.08429	-1.48946	-0.679114	24.7539	-6.49489	0.000551513	0.0184735	0.262818	0.00673877	0.166945
Q9VYE9	Q9VYE9	CG1622	FALSE	0	-0.131545	-0.390269	0.127179	29.5323	-1.23398	0.261862	0.421615	-6.12383	0.153796	0.106603
Q9VYG2	Q9VYG2	Bap60	FALSE	0	-0.188945	-0.399359	0.0214701	29.6989	-2.17935	0.0706015	0.19789	-4.88492	0.0721863	0.0866976
Q9VYK0	Q9VYK0	Smr	FALSE	0	-0.106125	-0.502412	0.290161	26.6132	-0.649947	0.539012	0.678683	-6.67088	0.247569	0.163283
Q9VYQ9	Q9VYQ9	Tango4	FALSE	0	-0.0370461	-0.210866	0.136774	28.5094	-0.517263	0.622875	0.745122	-6.75517	0.271805	0.0716195
Q9VYW4	Q9VYW4	CG1703	FALSE	0	0.167532	-0.163474	0.498537	26.3901	1.22837	0.263817	0.423873	-6.13019	0.15462	0.136385
Q9VYW5	Q9VYW5	CG2247	FALSE	0	0.0358545	-0.160339	0.232048	28.7184	0.443536	0.672415	0.779552	-6.79441	0.284364	0.0808379
Q9VYY7	Q9VYY7	HP5	FALSE	0	-0.548585	-0.791412	-0.305758	28.9701	-5.48297	0.0013752	0.0285447	-0.71099	0.0104125	0.100053
Q9VZ02	Q9VZ02	CG1738	TRUE	1	-0.293051	-0.940467	0.354364	25.4608	-1.09857	0.312711	0.47604	-6.27237	0.173649	0.266756
Q9VZ04	Q9VZ04	GCS1	FALSE	0	0.177579	-0.0443699	0.399528	25.4713	1.94181	0.0985572	0.240292	-5.21667	0.0876535	0.0914502
Q9VZ20	Q9VZ20	Dlic	FALSE	0	-0.0723093	-0.445031	0.300412	26.6851	-0.470845	0.653837	0.767621	-6.78053	0.280012	0.153573
Q9VZ22	Q9VZ22	Lint-1	TRUE	4	0.289391	-0.497953	1.07673	24.7696	0.892049	0.405603	0.564829	-6.4756	0.206038	0.324411
Q9VZ27	Q9VZ27	CDK2AP1	FALSE	0	-0.142269	-0.546695	0.262158	25.9388	-0.853766	0.424938	0.581215	-6.50977	0.212015	0.166637
Q9VZ60	Q9VZ60	CG2186	FALSE	0	0.171396	-0.225607	0.568399	26.9077	1.04779	0.333792	0.495367	-6.32512	0.1807	0.163578
Q9VZ62	Q9VZ62	feo	FALSE	0	0.0806811	-0.212186	0.373548	28.8018	0.668605	0.527805	0.670008	-6.65767	0.244405	0.120671
Q9VZ69	Q9VZ69	Imp	FALSE	0	-0.0769748	-0.322124	0.168174	26.8553	-0.762056	0.473967	0.625978	-6.58675	0.228344	0.101009
Q9VZC8	Q9VZC8	CG15019	FALSE	0	0.271851	-0.204713	0.748416	28.3943	1.38445	0.213916	0.377256	-5.94692	0.137615	0.19636
Q9VZE4	Q9VZE4	CG1316	FALSE	0	-0.259706	-0.534168	0.0147557	28.8082	-2.29651	0.0599376	0.180677	-4.71939	0.0659073	0.113087
Q9VZE6	Q9VZE6	CG11583	FALSE	0	0.0477398	-0.159658	0.255138	30.9176	0.558656	0.595952	0.721923	-6.73072	0.263343	0.0854548
Q9VZF5	Q9VZF5	pav	FALSE	0	0.176	-0.215855	0.567855	30.3482	1.09008	0.316161	0.478372	-6.28131	0.1745	0.161457
Q9VZI2	Q9VZI2	Ack	FALSE	0	-0.181917	-0.43653	0.0726959	26.3845	-1.73405	0.131929	0.283417	-5.4993	0.103385	0.104909
Q9VZJ3	Q9VZJ3	Rcd5	FALSE	0	0.0767595	-0.137614	0.291133	28.3608	0.86902	0.417154	0.574388	-6.4963	0.209525	0.0883288
Q9VZL3	Q9VZL3	Sc2	FALSE	0	0.101727	-0.165046	0.368499	28.5607	0.925471	0.38927	0.548046	-6.44482	0.199916	0.109919
Q9VZP5	Q9VZP5	eIF5B	FALSE	0	-0.00455075	-0.339314	0.330212	28.1899	-0.0329924	0.974716	0.981746	-6.90509	0.358121	0.137933
Q9VZQ1	Q9VZQ1	Ythdc1	FALSE	0	-0.0211751	-0.285491	0.243141	27.0158	-0.194433	0.852042	0.906535	-6.88405	0.330685	0.108907
Q9VZQ3	Q9VZQ3	kst	FALSE	0	0.0341146	-0.717179	0.785408	26.8827	0.110205	0.915723	0.94336	-6.89874	0.344118	0.309557
Q9VZS5	Q9VZS5	RpL28	FALSE	0	0.00383154	-0.179782	0.187445	29.3701	0.0506451	0.961198	0.974522	-6.90424	0.355485	0.0756547
Q9VZV8	Q9VZV8	CG16753	FALSE	0	0.877755	0.494711	1.2608	27.5422	5.56152	0.00127565	0.0275971	-0.630515	0.0100669	0.157827
Q9VZY0	Q9VZY0	Non2	TRUE	4	-0.498186	-1.12886	0.132491	25.0778	-1.91714	0.102036	0.24527	-5.25068	0.0894693	0.259859
Q9W002	Q9W002	msn	FALSE	0	-0.0359798	-0.216735	0.144776	28.8991	-0.483098	0.645587	0.762889	-6.77405	0.278286	0.0744772
Q9W020	Q9W020	CG9004	FALSE	0	0.465209	0.0691422	0.861276	26.2708	2.85068	0.028072	0.113927	-3.93576	0.0415582	0.163192
Q9W039	Q9W039	CG9018	FALSE	0	0.0187239	-0.192958	0.230406	25.4683	0.214674	0.836898	0.894555	-6.87932	0.326315	0.08722
Q9W047	Q9W047	CG5704	TRUE	5	0.0814849	-0.221732	0.384701	24.379	0.652218	0.53764	0.678566	-6.66929	0.247527	0.124935
Q9W061	Q9W061	mu2	TRUE	2	0.321615	-0.19763	0.84086	25.0493	1.50326	0.181819	0.340164	-5.79981	0.124085	0.213946
Q9W062	Q9W062	Mfap1	TRUE	7	0.514633	0.0171101	1.01216	24.5361	2.51046	0.0445587	0.149437	-4.41602	0.0545116	0.204996
Q9W074	Q9W074	HBS1	FALSE	0	-0.354559	-0.709703	0.00058553	25.4927	-2.42299	0.0502777	0.160554	-4.5401	0.0585669	0.146331
Q9W0A8	Q9W0A8	RpL23A	FALSE	0	-0.267495	-0.494044	-0.040946	30.5239	-2.86564	0.027516	0.112987	-3.91479	0.0412152	0.0933454
Q9W0B2	Q9W0B2	CG7970	TRUE	1	-0.351096	-0.852891	0.150698	24.1696	-1.69812	0.138726	0.291496	-5.54716	0.106332	0.206756
Q9W0B8	Q9W0B8	alphaCOP	FALSE	0	0.0860482	-0.14281	0.314906	29.3853	0.912524	0.395537	0.55585	-6.45685	0.202763	0.0942969
Q9W0D6	Q9W0D6	CG7879	FALSE	0	0.164892	-0.0478098	0.377593	25.7797	1.88147	0.107282	0.25138	-5.29967	0.0916983	0.0876399
Q9W0H8	Q9W0H8	scf	TRUE	1	-0.0317107	-0.519212	0.45579	25.4667	-0.15787	0.879568	0.919059	-6.89142	0.335254	0.200866
Q9W0L7	Q9W0L7	Usp10	FALSE	0	-0.421763	-0.601477	-0.242049	28.5532	-5.69581	0.00112379	0.0257634	-0.494912	0.00939796	0.074048
Q9W0M4	Q9W0M4	CG13887	FALSE	0	-0.309611	-0.491034	-0.128189	26.8074	-4.14186	0.00562988	0.0508924	-2.2255	0.0185645	0.0747518
Q9W0M7	Q9W0M7	Sf3b3	FALSE	0	0.245285	0.0503239	0.440247	28.5997	3.05346	0.0214608	0.100807	-3.65337	0.0367722	0.0803304
Q9W0P3	Q9W0P3	MED30	FALSE	0	0.186063	-0.0742336	0.446359	26.2123	1.73484	0.131783	0.283417	-5.49824	0.103385	0.107251
Q9W0P8	Q9W0P8	MED14	FALSE	0	0.138435	-0.102978	0.379848	27.711	1.39173	0.211812	0.375498	-5.93809	0.136974	0.09947
Q9W0R0	Q9W0R0	Cdc5	FALSE	0	0.147294	-0.0261388	0.320727	30.3742	2.06121	0.0833295	0.218287	-5.05075	0.0796267	0.0714599
Q9W0R7	Q9W0R7	Atac3	FALSE	0	0.123654	-0.127166	0.374473	26.2239	1.1965	0.275175	0.436641	-6.16603	0.159278	0.103346
Q9W0S7	Q9W0S7	Tudor-SN	FALSE	0	0.101759	-0.0794541	0.282972	29.1335	1.36286	0.220275	0.381446	-5.97299	0.139144	0.0746657
Q9W0T7	Q9W0T7	Dis3l2	FALSE	0	-0.106667	-0.384349	0.171015	25.2876	-0.932289	0.386	0.545442	-6.43844	0.198966	0.114414
Q9W102	Q9W102	Orc4	FALSE	0	0.115632	-0.090159	0.321422	25.8931	1.3637	0.220025	0.381446	-5.97198	0.139144	0.0847924
Q9W107	Q9W107	TyrRS-m	TRUE	4	0.095839	-0.136297	0.327975	24.6753	1.002	0.353775	0.516129	-6.37119	0.188273	0.0956475
Q9W124	Q9W124	CG4806	FALSE	0	0.232102	0.0575028	0.406702	29.1631	3.2263	0.0171472	0.0904605	-3.41598	0.0329981	0.0719406
Q9W135	Q9W135	CG42360	TRUE	5	-0.129922	-0.615108	0.355265	24.4946	-0.649892	0.539045	0.678683	-6.67092	0.247569	0.199913
Q9W137	Q9W137	CG4707	TRUE	3	0.389986	0.0706082	0.709364	24.5825	2.96356	0.0241577	0.106018	-3.7781	0.0386731	0.131594
Q9W140	Q9W140	CG3548	FALSE	0	0.0988459	-0.104024	0.301716	27.8372	1.18252	0.280287	0.442014	-6.18156	0.161238	0.0835889
Q9W141	Q9W141	ATPsynF	TRUE	7	0.407297	0.159397	0.655197	24.6068	3.98752	0.006732	0.0552173	-2.4175	0.0201421	0.102143
Q9W149	Q9W149	CG11414	FALSE	0	0.0190579	-0.253776	0.291891	25.1381	0.16953	0.870768	0.912969	-6.88923	0.333032	0.112416
Q9W158	Q9W158	CG4612	FALSE	0	-0.0170668	-0.314206	0.280073	26.9089	-0.139399	0.893546	0.929869	-6.89456	0.339197	0.122431
Q9W198	Q9W198	ocm	TRUE	2	-0.112912	-0.371328	0.145505	24.8586	-1.06044	0.328434	0.490989	-6.31214	0.179103	0.106476
Q9W1A2	Q9W1A2	Naa35	TRUE	3	0.743146	0.393625	1.09267	24.8319	5.16023	0.00188792	0.0317427	-1.05086	0.0115791	0.144014
Q9W1A9	Q9W1A9	enok	FALSE	0	0.0359407	-0.151894	0.223776	28.4437	0.464386	0.658207	0.769691	-6.78388	0.280767	0.0773941
Q9W1B9	Q9W1B9	RpL12	FALSE	0	-0.35965	-0.541457	-0.177843	28.3442	-4.80107	0.00272962	0.0349005	-1.44705	0.012731	0.0749104
Q9W1C5	Q9W1C5	IntS1	FALSE	0	0.179627	-0.038603	0.397857	28.7046	1.99768	0.091112	0.228673	-5.13928	0.0834153	0.0899179
Q9W1C8	Q9W1C8	CG3163	FALSE	0	0.00556532	-0.192293	0.203424	28.6147	0.068266	0.947719	0.965957	-6.90303	0.352361	0.081524
Q9W1F4	Q9W1F4	thoc5	FALSE	0	-0.0930094	-0.386195	0.200176	27.661	-0.769932	0.469607	0.623596	-6.58042	0.227475	0.120802
Q9W1F7	Q9W1F7	Stoml2	FALSE	0	-0.140858	-0.402304	0.120588	25.7475	-1.30758	0.237338	0.398853	-6.03873	0.145493	0.107724
Q9W1G1	Q9W1G1	CG3735	FALSE	0	-0.192737	-0.359956	-0.0255177	29.0529	-2.79735	0.0301532	0.118152	-4.0106	0.0430992	0.0688997
Q9W1G7	Q9W1G7	Nap1	FALSE	0	-0.494084	-1.09904	0.110867	27.7357	-1.98221	0.0931157	0.231435	-5.16076	0.0844227	0.24926
Q9W1H4	Q9W1H4	DNAlig1	TRUE	6	0.411595	-0.230471	1.05366	24.8185	1.55582	0.169092	0.326233	-5.73293	0.119003	0.264552
Q9W1H5	Q9W1H5	DCP1	FALSE	0	-0.191931	-0.466002	0.0821401	25.3043	-1.69962	0.138437	0.291287	-5.54518	0.106255	0.112926
Q9W1H8	Q9W1H8	Mtpbeta	FALSE	0	-0.190882	-0.378043	-0.00372156	26.3404	-2.47525	0.0467741	0.154174	-4.46596	0.0562394	0.0771163
Q9W1I0	Q9W1I0	TBPH	FALSE	0	-0.163382	-0.412778	0.086013	26.9769	-1.58996	0.161279	0.316379	-5.68896	0.115409	0.102759
Q9W1I6	Q9W1I6	ytr	TRUE	1	0.502022	0.127868	0.876175	25.1815	3.25643	0.0164968	0.088598	-3.37496	0.0323187	0.154163
Q9W1I8	Q9W1I8	Snap29	TRUE	2	0.287747	-0.220107	0.795601	24.6974	1.37512	0.216644	0.379056	-5.95821	0.138272	0.209252
Q9W1M9	Q9W1M9	Rrp4	TRUE	3	-0.525874	-0.700927	-0.350821	24.5282	-7.29088	0.000289504	0.0146378	0.941278	0.00533956	0.0721276
Q9W1N3	Q9W1N3	levy	FALSE	0	-0.277585	-0.684728	0.129557	26.4299	-1.6547	0.147392	0.302666	-5.60451	0.110406	0.167756
Q9W1R5	Q9W1R5	vir	FALSE	0	0.11097	-0.0451579	0.267098	29.5298	1.72502	0.133607	0.285821	-5.51137	0.104262	0.0643298
Q9W1V3	Q9W1V3	Fib	FALSE	0	-0.165598	-0.336911	0.00571482	33.6319	-2.34603	0.0559441	0.172314	-4.64924	0.0628567	0.0705865
Q9W1X4	Q9W1X4	Nup214	FALSE	0	-0.0174167	-0.347344	0.312511	28.9443	-0.12812	0.902103	0.934343	-6.89629	0.340829	0.135941
Q9W1X7	Q9W1X7	MED23	FALSE	0	0.118465	-0.0701679	0.307098	26.3246	1.5242	0.176645	0.333325	-5.77329	0.12159	0.0777229
Q9W1X9	Q9W1X9	asrij	TRUE	2	0.2126	-0.956782	1.38198	25.1888	0.441241	0.673988	0.779552	-6.79554	0.284364	0.481823
Q9W1Y1	Q9W1Y1	EMC8-9	FALSE	0	0.265573	-0.0945919	0.625737	26.9618	1.78958	0.122055	0.268536	-5.42469	0.0979563	0.148399
Q9W229	Q9W229	RpS24	FALSE	0	0.192394	-0.00511787	0.389906	29.434	2.36411	0.0545562	0.169632	-4.62362	0.0618783	0.0813814
Q9W246	Q9W246	CG4554	FALSE	0	0.216576	-0.0489742	0.482126	30.4898	1.97939	0.0934847	0.231899	-5.16467	0.0845921	0.109415
Q9W254	Q9W254	qkr58E-2	FALSE	0	-0.204831	-0.458358	0.0486969	26.1915	-1.96082	0.0959577	0.235074	-5.19039	0.08575	0.104461
Q9W255	Q9W255	qkr58E-1	FALSE	0	-0.434191	-0.680086	-0.188297	31.9731	-4.2855	0.00478232	0.0480354	-2.05014	0.0175223	0.101316
Q9W2D9	Q9W2D9	eIF3k	FALSE	0	-0.145885	-0.377464	0.0856944	25.8151	-1.5289	0.175502	0.331576	-5.76731	0.120952	0.095418
Q9W2E3	Q9W2E3	NC2alpha	FALSE	0	0.675408	0.447793	0.903022	25.1494	7.2017	0.000310281	0.0146378	0.868743	0.00533956	0.0937845
Q9W2E7	Q9W2E7	Rae1	FALSE	0	-0.414904	-0.606882	-0.222926	28.7003	-5.24523	0.00173452	0.0313438	-0.95989	0.0114336	0.0791012
Q9W2G5	Q9W2G5	TAF1C-like	FALSE	0	0.006954	-0.167472	0.18138	26.8692	0.096759	0.925965	0.949454	-6.90034	0.346341	0.0718693
Q9W2I4	Q9W2I4	Sgf29	TRUE	6	-0.0707812	-0.672939	0.531377	24.6418	-0.285283	0.784704	0.857792	-6.85924	0.312905	0.248108
Q9W2K3	Q9W2K3	hng1	FALSE	0	-0.0730767	-0.264635	0.118482	27.1694	-0.92586	0.389082	0.548046	-6.44446	0.199916	0.0789284
Q9W2N0	Q9W2N0	cpa	TRUE	5	-2.0464	-2.91307	-1.17973	25.2594	-5.73069	0.00108778	0.0255464	-0.460088	0.00931881	0.357095
Q9W2N6	Q9W2N6	CG9346	FALSE	0	0.437998	0.219963	0.656032	26.9932	4.87545	0.00252533	0.0346049	-1.36341	0.0126232	0.0898373
Q9W2N8	Q9W2N8	CG10543	TRUE	3	-0.368521	-0.765268	0.0282258	24.8691	-2.25433	0.0635717	0.186347	-4.77908	0.0679757	0.163473
Q9W2S1	Q9W2S1	Tango5	FALSE	0	0.239662	0.0100945	0.46923	25.1711	2.53371	0.0431562	0.147293	-4.38305	0.0537294	0.0945892
Q9W2U7	Q9W2U7	nocte	FALSE	0	-0.670528	-1.0337	-0.307354	28.6622	-4.48097	0.00384898	0.0434709	-1.81665	0.0158573	0.149639
Q9W2Y5	Q9W2Y5	ZAP3	TRUE	4	-1.07363	-2.68082	0.533568	26.2802	-1.62126	0.154416	0.310855	-5.64829	0.113393	0.662216
Q9W335	Q9W335	l(1)G0320	FALSE	0	-0.231705	-0.488867	0.025457	27.493	-2.18674	0.0698745	0.196931	-4.8745	0.0718363	0.105959
Q9W351	Q9W351	Aladin	FALSE	0	0.0968498	-0.200217	0.393916	27.5964	0.79125	0.457946	0.614177	-6.56302	0.224039	0.122401
Q9W363	Q9W363	mxc	FALSE	0	0.003002	-0.227338	0.233342	28.6191	0.0316307	0.975759	0.982153	-6.90514	0.358269	0.0949076
Q9W384	Q9W384	Bap111	FALSE	0	-0.350488	-0.679694	-0.0212828	30.6979	-2.5839	0.0402854	0.140953	-4.31193	0.0514167	0.135643
Q9W392	Q9W392	CCT2	FALSE	0	0.34259	-0.350889	1.03607	25.0658	1.19897	0.27428	0.436122	-6.16327	0.159088	0.285736
Q9W394	Q9W394	CG32708	FALSE	0	-0.265786	-0.495001	-0.0365702	25.5187	-2.81421	0.0294781	0.117222	-3.98692	0.0427602	0.0944441
Q9W396	Q9W396	HP1b	FALSE	0	-0.0560988	-0.335352	0.223155	25.0667	-0.487555	0.6426	0.761012	-6.77165	0.277602	0.115061
Q9W397	Q9W397	CG7246	FALSE	0	-0.0696954	-0.279725	0.140334	27.6645	-0.805363	0.450339	0.606772	-6.55128	0.221338	0.086539
Q9W3B2	Q9W3B2	Rbm13	FALSE	0	-0.649377	-0.903369	-0.395385	28.9123	-6.20506	0.000708249	0.0213308	-0.00260726	0.00778104	0.104653
Q9W3C0	Q9W3C0	CG1789	FALSE	0	-0.385303	-0.720806	-0.049799	25.2854	-2.78723	0.0305665	0.119466	-4.02483	0.0435788	0.138238
Q9W3C1	Q9W3C1	l(1)G0020	FALSE	0	0.136649	-0.0624736	0.335771	30.5315	1.66554	0.145182	0.29973	-5.59025	0.109335	0.0820448
Q9W3C2	Q9W3C2	CG1785	FALSE	0	0.000464496	-0.16535	0.166279	29.3121	0.00679874	0.994789	0.996086	-6.90569	0.363351	0.068321
Q9W3D1	Q9W3D1	Caf1-180	FALSE	0	-0.0798244	-0.342746	0.183097	26.6395	-0.736847	0.488109	0.637702	-6.60665	0.23262	0.108332
Q9W3E0	Q9W3E0	CG12112	TRUE	5	0.28274	-0.119018	0.684498	24.5814	1.70801	0.136822	0.289474	-5.53402	0.105594	0.165537
Q9W3E1	Q9W3E1	IntS4	FALSE	0	0.286295	0.0233204	0.549271	26.9264	2.64222	0.0372005	0.135554	-4.22938	0.0494473	0.108354
Q9W3K3	Q9W3K3	CG2260	FALSE	0	0.285352	0.0700481	0.500655	28.9006	3.21661	0.0173624	0.0904605	-3.4292	0.0329981	0.088712
Q9W3K4	Q9W3K4	CG1575	FALSE	0	-0.108275	-0.34675	0.130199	27.3218	-1.10194	0.311355	0.474446	-6.26882	0.173068	0.0982591
Q9W3M4	Q9W3M4	l(1)G0193	FALSE	0	-0.230114	-0.452727	-0.00750116	25.4624	-2.50877	0.0446622	0.149458	-4.41841	0.0545192	0.0917238
Q9W3M7	Q9W3M7	mahe	FALSE	0	-0.535922	-0.787789	-0.284054	28.3183	-5.16413	0.00188056	0.0317427	-1.04666	0.0115791	0.103778
Q9W3N1	Q9W3N1	spidey	FALSE	0	-0.492085	-0.818334	-0.165836	28.5921	-3.66066	0.00994927	0.0674382	-2.83608	0.0246001	0.134425
Q9W3Q5	Q9W3Q5	CHES-1-like	TRUE	3	-0.350777	-0.725206	0.0236521	25.0811	-2.27368	0.0618768	0.183546	-4.7517	0.0669537	0.154277
Q9W3R9	Q9W3R9	CG1677	FALSE	0	-0.191654	-0.390867	0.00755804	27.4832	-2.33491	0.056816	0.173674	-4.665	0.0633527	0.0820819
Q9W3W1	Q9W3W1	pod1	FALSE	0	-0.0385457	-0.237444	0.160353	25.4005	-0.470341	0.654177	0.767621	-6.78079	0.280012	0.0819527
Q9W3W6	Q9W3W6	sov	FALSE	0	-0.0133642	-0.254866	0.228137	27.182	-0.134305	0.897409	0.931332	-6.89536	0.339731	0.0995064
Q9W3X1	Q9W3X1	CG14440	FALSE	0	-0.192971	-0.8242	0.438258	25.041	-0.741948	0.485224	0.636209	-6.60267	0.232076	0.260087
Q9W3Y0	Q9W3Y0	CG3224	TRUE	1	-0.370839	-0.744762	0.00308328	25.2381	-2.40698	0.0514052	0.162466	-4.56281	0.0592642	0.154068
Q9W401	Q9W401	kdn	FALSE	0	-0.0707934	-0.24721	0.105623	26.8127	-0.973916	0.366494	0.528353	-6.39871	0.192732	0.0726895
Q9W403	Q9W403	CG3847	FALSE	0	-0.343341	-0.533215	-0.153467	25.9184	-4.38862	0.00426174	0.0454719	-1.92621	0.0165872	0.0782342
Q9W410	Q9W410	CG3815	FALSE	0	-0.251166	-0.566147	0.063814	27.3006	-1.93529	0.0994647	0.241376	-5.22567	0.088049	0.129782
Q9W424	Q9W424	Spx	FALSE	0	0.222331	-0.125213	0.569875	29.4799	1.5526	0.169847	0.326233	-5.73706	0.119003	0.143199
Q9W425	Q9W425	Rbcn-3A	TRUE	3	-1.08598	-4.36743	2.19546	26.925	-0.803205	0.451497	0.607799	-6.55309	0.221713	1.35206
Q9W445	Q9W445	MCTS1	TRUE	7	0.2109	-0.0142459	0.436047	24.5474	2.27343	0.0618989	0.183546	-4.75207	0.0669537	0.0927676
Q9W464	Q9W464	GAA1	TRUE	4	0.0201431	-0.449249	0.489536	24.4685	0.10415	0.920333	0.94684	-6.89948	0.345388	0.193405
Q9W485	Q9W485	IntS6	FALSE	0	0.0359309	-0.141733	0.213595	27.3808	0.490836	0.640405	0.760172	-6.76988	0.277295	0.0732035
Q9W499	Q9W499	RpL35	FALSE	0	0.0175918	-0.375718	0.410902	29.0185	0.108553	0.91698	0.944022	-6.89895	0.34436	0.162057
Q9W4B2	Q9W4B2	Vsx1	TRUE	3	0.270242	-0.335478	0.875962	25.1064	1.0828	0.319138	0.480534	-6.28893	0.175289	0.249576
Q9W4C1	Q9W4C1	CG15784	FALSE	0	0.510755	0.0979137	0.923596	29.3977	3.00261	0.0229438	0.103886	-3.72382	0.0378956	0.170104
Q9W4C4	Q9W4C4	spoon	TRUE	6	0.0148111	-0.490461	0.520083	24.5866	0.0711427	0.94552	0.964355	-6.9028	0.351777	0.208188
Q9W4H8	Q9W4H8	Pp2C1	FALSE	0	-0.0853165	-0.464733	0.2941	25.4851	-0.54574	0.604281	0.726406	-6.73854	0.264978	0.156332
Q9W4J5	Q9W4J5	CG3527	FALSE	0	-0.392213	-0.614841	-0.169585	28.8985	-4.27573	0.00483522	0.0480354	-2.06196	0.0175223	0.09173
Q9W4K1	Q9W4K1	rb	FALSE	0	-0.00841027	-0.210614	0.193794	25.4322	-0.100946	0.922774	0.948081	-6.89986	0.34584	0.0833147
Q9W4M9	Q9W4M9	Nsun2	FALSE	0	0.121504	-0.0709828	0.313992	26.4079	1.532	0.174752	0.330858	-5.76336	0.12069	0.079311
Q9W4N8	Q9W4N8	Vap33	FALSE	0	-0.296143	-0.466849	-0.125436	30.0811	-4.21037	0.00520638	0.0495593	-2.14146	0.0180782	0.0703366
Q9W4R1	Q9W4R1	CG2875	FALSE	0	-0.222358	-0.386661	-0.0580556	28.6793	-3.28456	0.0159137	0.0869871	-3.33675	0.0317311	0.067698
Q9W4W7	Q9W4W7	CG2662	FALSE	0	0.12943	-0.0818062	0.340666	25.0256	1.48708	0.185911	0.346553	-5.82018	0.126415	0.087036
Q9W4X7	Q9W4X7	eIF3g1	TRUE	3	-0.0356925	-0.425872	0.354487	25.5853	-0.222015	0.831425	0.891807	-6.87749	0.325313	0.160767
Q9W4Y3	Q9W4Y3	trol	FALSE	0	-0.0795042	-0.518248	0.35924	28.3354	-0.439792	0.674982	0.780115	-6.79625	0.28457	0.180777
Q9W4Z9	Q9W4Z9	CG3071	FALSE	0	-0.254276	-0.452972	-0.0555806	31.0772	-3.10589	0.0200395	0.0977163	-3.581	0.0356449	0.0818691
Q9W526	Q9W526	CG16903	FALSE	0	0.200491	0.0326122	0.368369	28.0884	2.89846	0.0263376	0.112062	-3.86888	0.040878	0.0691713
Q9W531	Q9W531	CG4281	TRUE	6	0.0277732	-0.310369	0.365916	24.4647	0.19934	0.848364	0.904294	-6.88295	0.329868	0.139326
Q9W542	Q9W542	mip130	FALSE	0	0.436613	0.178451	0.694775	30.4968	4.10463	0.00587607	0.0524747	-2.27148	0.0191417	0.106371
Q9W543	Q9W543	Rbcn-3B	TRUE	4	-1.44747	-3.19672	0.30179	25.4129	-2.00828	0.0897648	0.227148	-5.12456	0.0828589	0.72075
Q9W550	Q9W550	CG14805	FALSE	0	-0.769136	-0.936796	-0.601477	29.857	-11.1338	2.4715e-05	0.00539248	3.41661	0.00196707	0.0690812
Q9W592	Q9W592	Lrpprc2	TRUE	4	0.00216967	-0.257765	0.262104	24.61	0.0202581	0.984473	0.988333	-6.90548	0.360524	0.107102
Q9W5C2	Q9W5C2	TRAM	FALSE	0	0.161618	-0.0910502	0.414286	25.2865	1.55241	0.16989	0.326233	-5.73729	0.119003	0.104107
Q9W5E4	Q9W5E4	Mybbp1A	FALSE	0	0.21376	0.00887833	0.418642	30.4314	2.53217	0.0432481	0.147293	-4.38524	0.0537294	0.084418
Q9XYZ4	Q9XYZ4	mre11	FALSE	0	-0.00215996	-0.181062	0.176743	26.8749	-0.029302	0.977543	0.982661	-6.90522	0.358454	0.0737136
Q9XYZ5	Q9XYZ5	pic	FALSE	0	0.324784	0.109371	0.540196	27.857	3.65925	0.00996646	0.0674382	-2.83792	0.0246001	0.088757
Q9XYZ6	Q9XYZ6	CG5808	FALSE	0	0.426808	0.0976631	0.755952	26.0933	3.14713	0.0189933	0.0956867	-3.5243	0.0349045	0.135618
Q9XZ03	Q9XZ03	mbf1	FALSE	0	-0.324575	-0.570024	-0.0791258	26.3454	-3.20939	0.0175245	0.090938	-3.43906	0.0331723	0.101133
Q9XZ06	Q9XZ06	Nup93-1	FALSE	0	0.234419	-0.132566	0.601405	30.2389	1.55029	0.17039	0.326233	-5.74001	0.119003	0.15121
Q9XZ11	Q9XZ11	CG7139	TRUE	4	-0.43504	-1.45339	0.583311	24.773	-1.03681	0.338498	0.498977	-6.3363	0.182016	0.419594
Q9XZ19	Q9XZ19	CG3909	TRUE	4	-0.402956	-1.11552	0.309612	25.1834	-1.37246	0.217427	0.37951	-5.96143	0.138437	0.293601
Q9XZ21	Q9XZ21	snama	FALSE	0	0.233518	0.0573998	0.409637	29.5447	3.21799	0.0173315	0.0904605	-3.42732	0.0329981	0.0725665
Q9XZ29	Q9XZ29	Klp3A	FALSE	0	0.29249	0.0738872	0.511092	25.7484	3.24731	0.0166907	0.0893271	-3.38736	0.0325847	0.0900712
Q9XZ34	Q9XZ34	Rif1	FALSE	0	0.415316	0.118019	0.712614	29.4395	3.39045	0.0139124	0.0809451	-3.19386	0.0295271	0.122496
Q9XZ53	Q9XZ53	Stt3B	FALSE	0	0.12663	-0.179498	0.432757	27.6403	1.00393	0.352915	0.515774	-6.36928	0.188144	0.126134
Q9XZ57	Q9XZ57	Eb1	FALSE	0	0.769997	0.420432	1.11956	30.1816	5.34601	0.00157061	0.0310667	-0.853398	0.0113325	0.144032
Q9XZ61	Q9XZ61	Uch-L5	TRUE	4	-0.0487539	-0.708683	0.611175	24.7436	-0.1793	0.86341	0.910041	-6.88728	0.331964	0.271912
Q9XZT7	Q9XZT7	Taf10b	TRUE	1	0.131871	-0.682804	0.946547	25.3928	0.392857	0.707557	0.807736	-6.81809	0.294646	0.335673
Q9Y091	Q9Y091	fl(2)d	FALSE	0	0.182636	-0.1841	0.549371	29.9673	1.20865	0.270797	0.432375	-6.15244	0.157721	0.151107
Q9Y095	Q9Y095	XRCC1	FALSE	0	-0.0358666	-0.219271	0.147537	26.0944	-0.474625	0.651286	0.766571	-6.77854	0.279629	0.0755683
Q9Y0I1	Q9Y0I1	MRG15	FALSE	0	-0.414621	-0.700474	-0.128768	27.4956	-3.52028	0.0118259	0.0747515	-3.02068	0.0272678	0.117781
Q9Y0Z1	Q9Y0Z1	CG11970	TRUE	4	0.340551	-0.296972	0.978073	24.6248	1.29645	0.240912	0.402278	-6.05178	0.146743	0.26268
Q9Y105	Q9Y105	GlnRS	FALSE	0	0.140154	-0.112164	0.392473	27.7266	1.34811	0.224716	0.38609	-5.99067	0.140838	0.103963
Q9Y109	Q9Y109	Nulp1	FALSE	0	0.461099	0.230542	0.691656	25.2194	4.85383	0.00258288	0.0346049	-1.38763	0.0126232	0.0949969
Q9Y113	Q9Y113	NELF-B	FALSE	0	0.536053	0.187448	0.884658	27.9729	3.73201	0.00912328	0.0642815	-2.74334	0.0234485	0.143636
Q9Y134	Q9Y134	Mtr4	FALSE	0	0.0604117	-0.174997	0.29582	28.0987	0.622828	0.555566	0.691531	-6.68949	0.252256	0.0969958
Q9Y140	Q9Y140	CG7601	FALSE	0	-0.123094	-0.529966	0.283778	25.8862	-0.734256	0.489579	0.638158	-6.60866	0.232787	0.167644
Q9Y145	Q9Y145	CG7028	FALSE	0	0.210343	0.0421178	0.378568	28.2846	3.03463	0.0219974	0.103012	-3.67942	0.0375767	0.0693142
Q9Y1B2	Q9Y1B2	Orc6	TRUE	2	0.297313	-0.342276	0.936903	24.9848	1.12819	0.300932	0.464538	-6.24083	0.169454	0.263531
R9PY73	R9PY73	wcy	FALSE	0	0.114756	-0.110552	0.340064	25.6373	1.23614	0.261112	0.421537	-6.12138	0.153768	0.0928342
R9Q794	R9Q794	RpL5	FALSE	0	0.0528182	-0.133462	0.239098	31.2181	0.688153	0.516226	0.66312	-6.64349	0.241893	0.0767535
T2GGJ9	T2GGJ9	CG6379	TRUE	4	0.785556	0.243417	1.3277	24.6948	3.5167	0.0118787	0.0747773	-3.02543	0.0272772	0.223379
X2J5G6	X2J5G6	RpL7	FALSE	0	0.190605	-0.0196536	0.400864	31.6807	2.20014	0.0685764	0.194403	-4.85562	0.0709143	0.0866334
X2J6S0	X2J6S0	msl-1	FALSE	0	0.825965	0.61499	1.03694	27.0935	9.50168	6.30314e-05	0.00892539	2.50181	0.0032558	0.0869283
X2J875	X2J875	Bdp1	TRUE	5	0.245079	-0.019469	0.509628	24.5781	2.24838	0.0641019	0.187187	-4.78748	0.0682821	0.109003
X2J8R0	X2J8R0	sip1	FALSE	0	0.107798	-0.170881	0.386477	26.3468	0.938805	0.382895	0.542052	-6.4323	0.197729	0.114825
X2J935	X2J935	Nedd8	FALSE	0	0.180204	-0.0523825	0.41279	25.712	1.88039	0.107444	0.25138	-5.30114	0.0916983	0.0958331
X2J950	X2J950	RpS13	FALSE	0	-0.297531	-0.630898	0.0358369	29.0198	-2.16609	0.0719251	0.200139	-4.90359	0.0730068	0.137358
X2J969	X2J969	MED19	FALSE	0	0.895475	0.386154	1.4048	27.1272	4.26708	0.00488262	0.0480354	-2.07245	0.0175223	0.209857
X2J9A4	X2J9A4	Trp1	FALSE	0	-0.209411	-0.405605	-0.0132174	27.8604	-2.5905	0.039923	0.140646	-4.30258	0.0513048	0.0808382
X2J9B3	X2J9B3	E2f2	FALSE	0	0.208768	-0.0629877	0.480523	28.2255	1.86446	0.109876	0.253424	-5.32294	0.0924438	0.111972
X2J9F3	X2J9F3	Nup160	FALSE	0	0.228937	-0.130097	0.58797	30.5304	1.54757	0.171033	0.326233	-5.7435	0.119003	0.147933
X2J9X1	X2J9X1	Hnf4	FALSE	0	0.431073	0.162242	0.699903	25.4168	3.89171	0.00753589	0.058757	-2.53852	0.0214333	0.110767
X2JA36	X2JA36	YL-1	FALSE	0	-0.0874326	-0.395619	0.220754	27.145	-0.688538	0.515999	0.66312	-6.64321	0.241893	0.126983
X2JA43	X2JA43	Ns3	TRUE	4	0.663079	-0.252054	1.57821	25.1273	1.75853	0.127484	0.276962	-5.4665	0.10103	0.377065
X2JAA8	X2JAA8	wapl	FALSE	0	0.243888	-0.0629398	0.550716	26.3369	1.92914	0.100328	0.24253	-5.23415	0.08847	0.126423
X2JAF1	X2JAF1	lva	FALSE	0	0.0832282	-0.318154	0.484611	30.4303	0.503247	0.63214	0.752105	-6.76306	0.274352	0.165383
X2JB48	X2JB48	sesB	FALSE	0	0.0159923	-0.170793	0.202777	33.6069	0.207796	0.842036	0.898796	-6.88098	0.327862	0.0769614
X2JBC1	X2JBC1	Upf1	FALSE	0	0.188567	-0.00569553	0.38283	30.1323	2.35584	0.0551867	0.170901	-4.63534	0.062341	0.0800424
X2JC31	X2JC31	Chc	FALSE	0	-0.0850011	-0.388438	0.218436	29.6538	-0.679868	0.521113	0.667025	-6.64954	0.243317	0.125026
X2JC35	X2JC35	RpL36	FALSE	0	0.0971054	-0.288259	0.48247	29.0946	0.611562	0.562533	0.698166	-6.69702	0.254676	0.158783
X2JC79	X2JC79	eIF4H1	FALSE	0	-0.0712975	-0.300738	0.158143	29.4772	-0.754175	0.478357	0.630692	-6.59303	0.230064	0.094537
X2JCE0	X2JCE0	kz	FALSE	0	-0.113727	-0.286561	0.0591072	29.7936	-1.59699	0.159712	0.31493	-5.67985	0.11488	0.0712132
X2JCP8	X2JCP8	Act5C	FALSE	0	-0.29122	-0.469509	-0.112931	32.3059	-3.96429	0.00691774	0.0556316	-2.44671	0.0202933	0.0734608
X2JCS6	X2JCS6	RpL7A	FALSE	0	0.290881	0.0696092	0.512153	30.5867	3.19049	0.0179568	0.0922461	-3.46488	0.0336495	0.0911712
X2JCX8	X2JCX8	RpS14a	FALSE	0	0.208726	0.0293969	0.388056	29.6692	2.82484	0.0290605	0.116242	-3.97199	0.0424027	0.0738896
X2JDP6	X2JDP6	Ndf	FALSE	0	0.0889692	-0.087743	0.265681	31.2639	1.22192	0.266085	0.42618	-6.1375	0.155462	0.0728111
X2JDU0	X2JDU0	RpL9	FALSE	0	-0.34156	-0.616373	-0.0667466	29.3576	-3.01646	0.022529	0.103527	-3.70459	0.0377646	0.113232
X2JE06	X2JE06	RpL24	FALSE	0	0.0266864	-0.153494	0.206867	28.8097	0.35946	0.731159	0.823358	-6.83221	0.300344	0.0742402
X2JE29	X2JE29	TH1	FALSE	0	-0.460063	-0.850203	-0.0699228	25.5341	-2.86197	0.0276514	0.112987	-3.91994	0.0412152	0.16075
X2JEU3	X2JEU3	CG1737	FALSE	0	0.22062	0.0430133	0.398227	29.1411	3.01477	0.0225792	0.103527	-3.70694	0.0377646	0.0731797
X2JEW2	X2JEW2	CG2691	FALSE	0	0.101671	-0.0573639	0.260706	30.079	1.55158	0.170087	0.326233	-5.73836	0.119003	0.0655276
X2JF59	X2JF59	Jafrac1	FALSE	0	0.0932162	-0.202694	0.389126	28.7257	0.764541	0.472588	0.625207	-6.58476	0.228063	0.121924
X2JFM3	X2JFM3	mnb	TRUE	1	0.10567	-0.562431	0.773771	25.2149	0.383865	0.713879	0.813441	-6.82201	0.296726	0.275279
X2JFP6	X2JFP6	Rip11	FALSE	0	-0.273415	-0.560701	0.0138704	26.3286	-2.30982	0.0588365	0.177899	-4.70056	0.064894	0.118371
X2JFR1	X2JFR1	nonA	FALSE	0	-0.422983	-0.766341	-0.0796254	28.2136	-2.98982	0.0233338	0.103886	-3.74157	0.0378956	0.141474
X2JFR6	X2JFR6	eIF2alpha	FALSE	0	-0.191925	-0.547495	0.163645	26.4223	-1.31001	0.236563	0.398354	-6.03587	0.145311	0.146506
X2JFW6	X2JFW6	CG8289	FALSE	0	-0.273986	-0.451326	-0.0966451	28.5668	-3.74963	0.0089312	0.063756	-2.72056	0.0232569	0.0730701
X2JG50	X2JG50	Elys	FALSE	0	0.166875	-0.129427	0.463176	30.3454	1.36687	0.219084	0.381101	-5.96817	0.139018	0.122086
X2JGB3	X2JGB3	Bre1	FALSE	0	0.602138	0.310329	0.893947	26.3359	5.00802	0.00220253	0.0336133	-1.21641	0.0122614	0.120235
X2JGM9	X2JGM9	RpS4	FALSE	0	-0.0436597	-0.234848	0.147528	30.5571	-0.554228	0.5988	0.723281	-6.73342	0.263838	0.0787756
X2JH42	X2JH42	ATPsynbeta	FALSE	0	-0.284862	-0.772803	0.20308	25.9264	-1.41689	0.204675	0.368127	-5.90735	0.134285	0.201048
X2JIQ5	X2JIQ5	RpL17	FALSE	0	-0.00556009	-0.392615	0.381494	30.2114	-0.0348641	0.973282	0.98159	-6.90501	0.358064	0.159479
X2JJP5	X2JJP5	Sec16	FALSE	0	-0.384813	-0.69635	-0.0732768	25.944	-2.99785	0.0230881	0.103886	-3.73042	0.0378956	0.128363
X2JKF2	X2JKF2	CG9213	TRUE	1	0.626523	0.180959	1.07209	24.996	3.41268	0.0135282	0.0802291	-3.16404	0.0292659	0.183587
X2JKU5	X2JKU5	RpS5a	FALSE	0	-0.413289	-0.763347	-0.0632313	28.4147	-2.86538	0.0275256	0.112987	-3.91516	0.0412152	0.144235
X2JLB5	X2JLB5	Rpp20	TRUE	3	0.907715	-0.785336	2.60077	25.9816	1.30121	0.239376	0.4014	-6.0462	0.146422	0.697592

## Sheet: H3K4me3_vs_H3K9me3
name	Uniprot	symbol	imputed	num_NAs	H3K4me3_vs_H3K9me3.logFC	H3K4me3_vs_H3K9me3.CI.L	H3K4me3_vs_H3K9me3.CI.R	H3K4me3_vs_H3K9me3.AveExpr	H3K4me3_vs_H3K9me3.t	H3K4me3_vs_H3K9me3.P.Value	H3K4me3_vs_H3K9me3.adj.P.Val	H3K4me3_vs_H3K9me3.B	H3K4me3_vs_H3K9me3.q.val	H3K4me3_vs_H3K9me3.SEM
A0A023GQA5	A0A023GQA5	l(2)37Cc	FALSE	0	-1.66207	-1.92005	-1.4041	26.2656	-15.6366	3.20039e-06	0.00182951	5.36583	0.000569487	0.106294
A0A0B4JCV4	A0A0B4JCV4	tacc	FALSE	0	-0.401384	-0.645049	-0.15772	26.9334	-3.99794	0.00665045	0.0291028	-2.53047	0.00905909	0.100398
A0A0B4JCW4	A0A0B4JCW4	ScsbetaA	FALSE	0	-0.104142	-0.303091	0.0948065	29.2527	-1.27044	0.249449	0.359768	-6.22874	0.111988	0.0819733
A0A0B4JCZ3	A0A0B4JCZ3	pre-mod(mdg4)-W	FALSE	0	-0.610858	-0.897529	-0.324188	26.7906	-5.17161	0.00186652	0.0151757	-1.14971	0.00472387	0.118118
A0A0B4JD11	A0A0B4JD11	eEF1gamma	FALSE	0	-0.339291	-0.547866	-0.130716	32.0361	-3.94801	0.00705133	0.029837	-2.59384	0.00928763	0.0859396
A0A0B4JD24	A0A0B4JD24	CG17002	FALSE	0	-0.881147	-1.38863	-0.373669	26.589	-4.21405	0.00518462	0.0258505	-2.26052	0.00804669	0.209097
A0A0B4JD39	A0A0B4JD39	ttk	FALSE	0	0.116349	-0.132328	0.365026	28.6388	1.13553	0.298072	0.409883	-6.38012	0.127588	0.102463
A0A0B4JD46	A0A0B4JD46	CNBP	FALSE	0	-0.881418	-1.34262	-0.420217	29.1595	-4.63832	0.00324483	0.0204265	-1.75131	0.00635832	0.19003
A0A0B4JDA0	A0A0B4JDA0	mor	FALSE	0	0.0840837	-0.0910901	0.259258	29.7808	1.16496	0.286826	0.398873	-6.34801	0.124161	0.0721773
A0A0B4JDC3	A0A0B4JDC3	CG6621	FALSE	0	0.54272	0.293069	0.792371	27.3499	5.27607	0.00168238	0.0144477	-1.03674	0.00449725	0.102864
A0A0B4K618	A0A0B4K618	Fmr1	FALSE	0	-0.263638	-0.436489	-0.0907865	31.4471	-3.70172	0.00946433	0.0365256	-2.9119	0.0113697	0.0712204
A0A0B4K652	A0A0B4K652	RpII15	FALSE	0	-0.371939	-0.676378	-0.067501	28.2075	-2.96511	0.0241079	0.0678201	-3.91222	0.0211109	0.125438
A0A0B4K6J3	A0A0B4K6J3	mld	FALSE	0	0.249301	-0.21787	0.716472	24.9633	1.29514	0.241334	0.3507	-6.19993	0.109165	0.192489
A0A0B4K6L4	A0A0B4K6L4	Prat	FALSE	0	-0.154344	-0.30872	3.11734e-05	26.6401	-2.4265	0.0500339	0.113687	-4.6756	0.0353882	0.0636077
A0A0B4K6N1	A0A0B4K6N1	RpS8	FALSE	0	-0.126	-0.330624	0.0786237	30.6369	-1.49446	0.184035	0.287859	-5.95671	0.0896043	0.0843116
A0A0B4K6U6	A0A0B4K6U6	sqd	FALSE	0	-0.370111	-0.656287	-0.0839346	32.5793	-3.13882	0.0191991	0.0597968	-3.67047	0.0186135	0.117914
A0A0B4K6W1	A0A0B4K6W1	su(Hw)	FALSE	0	0.157183	-0.0498952	0.364261	28.093	1.84221	0.113364	0.201303	-5.4974	0.0626614	0.0853229
A0A0B4K6Y4	A0A0B4K6Y4	unk	TRUE	1	-0.683301	-1.09075	-0.275855	25.4376	-4.07016	0.0061147	0.0277875	-2.43947	0.00864965	0.167881
A0A0B4K726	A0A0B4K726	Tfb1	FALSE	0	-0.0522255	-0.481975	0.377524	25.4957	-0.294942	0.777651	0.835296	-7.00502	0.26001	0.177071
A0A0B4K7G4	A0A0B4K7G4	mod	FALSE	0	-0.0883883	-0.283622	0.106845	31.9234	-1.09877	0.31263	0.424205	-6.41947	0.132046	0.0804426
A0A0B4K7J2	A0A0B4K7J2	Nup358	FALSE	0	0.13223	-0.123892	0.388353	33.2993	1.25301	0.255319	0.366128	-6.24889	0.113968	0.105531
A0A0B4K7L0	A0A0B4K7L0	rad50	FALSE	0	0.44733	0.265009	0.629651	28.6365	5.95471	0.000885453	0.00968482	-0.33967	0.00301468	0.0751221
A0A0B4K7T7	A0A0B4K7T7	RhoGEF2	FALSE	0	-1.22415	-1.52707	-0.921234	26.3239	-9.80793	5.23244e-05	0.00307637	2.66281	0.000957608	0.124813
A0A0B4K812	A0A0B4K812	Lis-1	TRUE	3	-0.614642	-1.11308	-0.116202	25.0205	-2.9928	0.0232422	0.0667499	-3.87348	0.0207778	0.205373
A0A0B4K849	A0A0B4K849	hts	FALSE	0	-0.175759	-0.353392	0.00187295	30.2809	-2.4014	0.0518042	0.115993	-4.71138	0.0361061	0.0731903
A0A0B4K859	A0A0B4K859	Nup188	FALSE	0	0.5181	0.0411752	0.995024	29.3894	2.63653	0.0374902	0.0918419	-4.37637	0.0285884	0.196508
A0A0B4K891	A0A0B4K891	CG8963	TRUE	4	-0.798039	-1.26962	-0.326462	24.9262	-4.10715	0.00585902	0.0271352	-2.39316	0.00844662	0.194305
A0A0B4KEE4	A0A0B4KEE4	koi	FALSE	0	-0.102682	-0.317987	0.112622	31.3953	-1.15747	0.289651	0.402265	-6.35622	0.125216	0.0887124
A0A0B4KEH0	A0A0B4KEH0	14-3-3zeta	FALSE	0	-0.166923	-0.400826	0.0669797	26.9878	-1.73201	0.132307	0.224101	-5.64672	0.0697579	0.0963756
A0A0B4KEK1	A0A0B4KEK1	E(Pc)	TRUE	2	0.241251	-0.0872118	0.569714	25.1291	1.78259	0.123257	0.214651	-5.57854	0.0668163	0.135337
A0A0B4KER0	A0A0B4KER0	row	FALSE	0	-0.325657	-0.586881	-0.0644332	31.0752	-3.02563	0.0222589	0.0654974	-3.82765	0.0203879	0.107633
A0A0B4KEW3	A0A0B4KEW3	Zasp52	FALSE	0	-0.962829	-1.31922	-0.606443	25.7366	-6.55687	0.000523377	0.00762955	0.228942	0.00237492	0.146843
A0A0B4KEX0	A0A0B4KEX0	clu	FALSE	0	0.107145	-0.301836	0.516125	27.777	0.635825	0.547594	0.650003	-6.82915	0.202332	0.168513
A0A0B4KF46	A0A0B4KF46	Uba1	TRUE	1	0.0723623	-0.776391	0.921115	25.6314	0.206919	0.842692	0.884136	-7.03021	0.275213	0.349714
A0A0B4KF79	A0A0B4KF79	CG14657	TRUE	7	0.548683	-0.0123831	1.10975	24.4467	2.37343	0.0538544	0.118178	-4.75125	0.0367864	0.231177
A0A0B4KFB8	A0A0B4KFB8	CG42724	FALSE	0	1.29821	0.84421	1.75221	27.4496	6.93999	0.000381829	0.00674125	0.568385	0.00209841	0.187062
A0A0B4KFE9	A0A0B4KFE9	Mtor	FALSE	0	0.290659	0.0397344	0.541584	32.3759	2.81131	0.0295929	0.078099	-4.12856	0.0243105	0.103389
A0A0B4KFJ7	A0A0B4KFJ7	Kdm2	TRUE	2	0.65003	-0.0382197	1.33828	25.611	2.29222	0.0602975	0.127747	-4.86687	0.039765	0.283581
A0A0B4KFN0	A0A0B4KFN0	Taf12	TRUE	7	-0.455691	-1.09581	0.184424	24.8578	-1.72775	0.133097	0.225013	-5.65242	0.0700417	0.263748
A0A0B4KFV4	A0A0B4KFV4	CG15107	FALSE	0	-0.158009	-0.323527	0.00751	27.466	-2.31688	0.0582609	0.124636	-4.83179	0.0387965	0.068199
A0A0B4KFZ9	A0A0B4KFZ9	His4r	FALSE	0	0.310977	0.114135	0.507819	35.223	3.83424	0.00806888	0.0326821	-2.73965	0.0101732	0.0811053
A0A0B4KG58	A0A0B4KG58	Patronin	FALSE	0	-0.733357	-0.980025	-0.486688	29.2723	-7.21556	0.000306943	0.00635886	0.802536	0.00197938	0.101635
A0A0B4KG83	A0A0B4KG83	Arp5	FALSE	0	0.448397	0.209391	0.687403	25.4558	4.55327	0.00355698	0.0211591	-1.85119	0.00658638	0.0984781
A0A0B4KG97	A0A0B4KG97	fru	FALSE	0	-0.0761244	-0.325481	0.173232	26.2237	-0.740921	0.485804	0.59128	-6.75175	0.184053	0.102743
A0A0B4KGD7	A0A0B4KGD7	cic	TRUE	3	-0.13488	-0.766907	0.497147	24.8194	-0.517942	0.622428	0.715071	-6.90347	0.222586	0.260415
A0A0B4KGP8	A0A0B4KGP8	eIF2gamma	FALSE	0	-0.0698701	-0.329593	0.189853	28.5097	-0.652904	0.537226	0.640667	-6.81726	0.199426	0.107014
A0A0B4KH12	A0A0B4KH12	bon	FALSE	0	0.311168	0.0141468	0.608189	27.3105	2.54259	0.0426332	0.101369	-4.51011	0.0315541	0.122382
A0A0B4KH25	A0A0B4KH25	His2Av	FALSE	0	0.953776	0.522582	1.38497	36.0809	5.36837	0.00153666	0.0138995	-0.938226	0.00432663	0.177666
A0A0B4KH34	A0A0B4KH34	AnxB9	FALSE	0	-0.205864	-0.416881	0.00515265	26.5148	-2.36773	0.0542822	0.118602	-4.75937	0.0369184	0.0869458
A0A0B4KH51	A0A0B4KH51	Abi	FALSE	0	-0.850323	-1.29293	-0.407718	27.4849	-4.66269	0.00316115	0.0199816	-1.72289	0.00621983	0.182367
A0A0B4KHD9	A0A0B4KHD9	CG5746	FALSE	0	-0.764735	-1.1669	-0.362574	28.0513	-4.61509	0.00332693	0.020773	-1.77848	0.00646619	0.165703
A0A0B4KHE1	A0A0B4KHE1	CG15514	FALSE	0	-0.0531063	-0.431001	0.324788	25.7249	-0.34107	0.744295	0.810581	-6.98838	0.252316	0.155705
A0A0B4KHF2	A0A0B4KHF2	tmod	TRUE	4	-0.846727	-1.04438	-0.649076	24.842	-10.3971	3.70954e-05	0.00307637	3.0142	0.000957608	0.0814388
A0A0B4KHH6	A0A0B4KHH6	dgt1	FALSE	0	0.0214376	-0.179947	0.222822	28.4336	0.258357	0.804482	0.859308	-7.01654	0.267484	0.0829769
A0A0B4KHI4	A0A0B4KHI4	Syp	TRUE	1	-0.602154	-1.25281	0.048504	25.89	-2.24607	0.0643094	0.133926	-4.93246	0.0416883	0.268092
A0A0B4KHL2	A0A0B4KHL2	gammaCOP	FALSE	0	-0.00443319	-0.305931	0.297064	26.9644	-0.0356863	0.972652	0.979668	-7.05406	0.30495	0.124227
A0A0B4KHR8	A0A0B4KHR8	mask	FALSE	0	-0.388494	-0.620687	-0.156301	26.8074	-4.06073	0.00618184	0.0279488	-2.4513	0.00869988	0.095671
A0A0B4KHS9	A0A0B4KHS9	Pp1alpha-96A	TRUE	1	-0.11997	-0.541444	0.301503	25.1874	-0.690833	0.514651	0.62049	-6.7899	0.193145	0.173661
A0A0B4KHX3	A0A0B4KHX3	dco	FALSE	0	-0.157556	-0.321902	0.00678974	28.3516	-2.32673	0.0574672	0.123282	-4.81777	0.0383749	0.0677159
A0A0B4KI24	A0A0B4KI24	Nlp	FALSE	0	-0.397373	-0.685665	-0.109081	26.4795	-3.3453	0.0147299	0.0492923	-3.38746	0.0153436	0.118786
A0A0B4KI32	A0A0B4KI32	cindr	TRUE	1	-0.0543152	-0.744858	0.636228	25.2393	-0.190897	0.854695	0.893677	-7.03386	0.278182	0.284526
A0A0B4KI43	A0A0B4KI43	woc	FALSE	0	-0.0385697	-0.196376	0.119237	29.1186	-0.593186	0.574012	0.674584	-6.8576	0.209984	0.0650213
A0A0B4LEK8	A0A0B4LEK8	Sec24AB	TRUE	5	0.182998	-0.829956	1.19595	24.6813	0.438455	0.6759	0.758351	-6.9457	0.236058	0.417369
A0A0B4LEV3	A0A0B4LEV3	CG8635	FALSE	0	-0.297979	-0.631885	0.0359263	26.392	-2.16586	0.0719482	0.143828	-5.04613	0.0447704	0.13758
A0A0B4LEV8	A0A0B4LEV8	coil	FALSE	0	-0.0011929	-0.239125	0.236739	28.4027	-0.012168	0.990673	0.992612	-7.05471	0.308979	0.0980356
A0A0B4LEY9	A0A0B4LEY9	Non1	FALSE	0	0.26888	0.0835215	0.454238	30.8698	3.52059	0.0118214	0.0419347	-3.15141	0.0130534	0.0763735
A0A0B4LF25	A0A0B4LF25	Prosap	TRUE	3	-0.698368	-1.27626	-0.120477	25.0728	-2.93297	0.0251569	0.0702564	-3.95728	0.0218693	0.23811
A0A0B4LF26	A0A0B4LF26	eIF3j	FALSE	0	-0.228204	-0.756916	0.300507	25.7714	-1.04755	0.333896	0.443271	-6.47284	0.137981	0.217846
A0A0B4LF82	A0A0B4LF82	Sin3A	FALSE	0	-0.0381332	-0.192685	0.116419	30.2771	-0.598821	0.570477	0.670944	-6.85394	0.20885	0.0636804
A0A0B4LFB3	A0A0B4LFB3	eIF3m	TRUE	1	0.126469	-1.53112	1.78406	23.9993	0.185172	0.858994	0.896951	-7.03509	0.279202	0.682979
A0A0B4LFB8	A0A0B4LFB8	Opa1	FALSE	0	0.109553	-0.0563209	0.275426	28.1648	1.60293	0.1584	0.256649	-5.81746	0.0798893	0.0683453
A0A0B4LFD2	A0A0B4LFD2	Hsc70-5	FALSE	0	0.162656	-0.22287	0.548181	25.9704	1.02396	0.344074	0.453647	-6.49681	0.14121	0.158849
A0A0B4LFD9	A0A0B4LFD9	RpS23	FALSE	0	-0.191119	-0.356632	-0.0256053	28.7452	-2.80246	0.0299472	0.0784964	-4.14107	0.0244342	0.0681969
A0A0B4LFK8	A0A0B4LFK8	Dcr-2	TRUE	5	0.111432	-0.940793	1.16366	24.2034	0.257021	0.805467	0.859762	-7.01693	0.267625	0.433551
A0A0B4LFL2	A0A0B4LFL2	eIF3c	FALSE	0	0.216016	-0.0867015	0.518734	27.9481	1.73188	0.132331	0.224101	-5.64689	0.0697579	0.124729
A0A0B4LFL3	A0A0B4LFL3	eEF1beta	FALSE	0	-0.480019	-0.648785	-0.311252	30.8673	-6.90305	0.000393377	0.00681106	0.536369	0.00212014	0.0695372
A0A0B4LFW6	A0A0B4LFW6	Rme-8	FALSE	0	0.651179	-0.668534	1.97089	25.4075	1.19754	0.2748	0.38477	-6.31185	0.119771	0.543764
A0A0B4LFY2	A0A0B4LFY2	CG11007	TRUE	1	-0.0964151	-0.345126	0.152295	24.7301	-0.940849	0.381925	0.491732	-6.57816	0.153066	0.102477
A0A0B4LG52	A0A0B4LG52	RpS16	FALSE	0	-0.161177	-0.373188	0.0508345	30.5674	-1.84507	0.112911	0.200977	-5.4935	0.0625598	0.0873554
A0A0B4LGC6	A0A0B4LGC6	l(2)k09913	FALSE	0	-0.076312	-0.264896	0.112272	25.5693	-0.982104	0.362749	0.470992	-6.53841	0.14661	0.0777026
A0A0B4LGG6	A0A0B4LGG6	Lpt	FALSE	0	0.0731523	-0.100058	0.246363	25.4342	1.025	0.343623	0.453441	-6.49577	0.141147	0.0713683
A0A0B4LGH1	A0A0B4LGH1	betaTub60D	FALSE	0	-0.0220668	-0.208514	0.16438	27.5072	-0.287245	0.78327	0.840156	-7.00756	0.261522	0.0768222
A0A0B4LGR2	A0A0B4LGR2	ctrip	FALSE	0	0.00599651	-0.301396	0.313389	25.3544	0.047345	0.963724	0.972589	-7.05351	0.302746	0.126655
A0A0B4LGT9	A0A0B4LGT9	CG9667	TRUE	1	-0.0913771	-0.637959	0.455205	25.4088	-0.405743	0.698543	0.776946	-6.96117	0.241847	0.225209
A0A0B4LGV1	A0A0B4LGV1	EMC1	FALSE	0	0.0618169	-0.0931041	0.216738	27.1568	0.968424	0.369022	0.477924	-6.55173	0.148768	0.0638325
A0A0B4LGV6	A0A0B4LGV6	Ibf1	FALSE	0	-0.0582923	-0.297743	0.181158	30.0565	-0.590833	0.575491	0.674775	-6.85912	0.210043	0.0986613
A0A0B4LGW1	A0A0B4LGW1	sub	FALSE	0	-0.228071	-0.516	0.0598583	25.8758	-1.92244	0.101278	0.185637	-5.38705	0.0577847	0.118636
A0A0B4LGZ0	A0A0B4LGZ0	Unc-115a	FALSE	0	-0.439037	-0.687132	-0.190942	27.3853	-4.29489	0.0047321	0.0247228	-2.16138	0.00769567	0.102223
A0A0B4LGZ5	A0A0B4LGZ5	RpL11	FALSE	0	-0.10895	-0.356853	0.138953	29.3393	-1.06663	0.325841	0.436729	-6.45316	0.135944	0.102144
A0A0B4LH50	A0A0B4LH50	Act87E	FALSE	0	-0.288889	-0.537487	-0.0402908	28.8173	-2.82034	0.0292365	0.07756	-4.11581	0.0241427	0.10243
A0A0B4LHC1	A0A0B4LHC1	RhoGAP92B	FALSE	0	-0.0613359	-0.293784	0.171112	27.5629	-0.640409	0.544799	0.64869	-6.82598	0.201923	0.0957761
A0A0B4LHE5	A0A0B4LHE5	pre-mod(mdg4)-P	TRUE	5	-0.212302	-0.562963	0.138359	24.6103	-1.46938	0.190487	0.294354	-5.98827	0.0916262	0.144484
A0A0B4LHE8	A0A0B4LHE8	pre-mod(mdg4)-B	TRUE	3	-0.445068	-0.791528	-0.0986081	24.8773	-3.11776	0.0197322	0.0606173	-3.69962	0.0188689	0.142753
A0A0B4LHF7	A0A0B4LHF7	pit	FALSE	0	0.24257	0.0351639	0.449976	30.999	2.83847	0.0285346	0.0764907	-4.09022	0.0238099	0.0854581
A0A0B4LHH1	A0A0B4LHH1	Gpat4	TRUE	6	0.648996	0.288098	1.00989	24.4359	4.36442	0.004378	0.0241734	-2.0769	0.00752466	0.148702
A0A0B4LHR3	A0A0B4LHR3	XNP	FALSE	0	0.0679472	-0.137436	0.273331	28.3715	0.802924	0.451647	0.557661	-6.70146	0.173588	0.0846247
A0A0B4LHU8	A0A0B4LHU8	kay	TRUE	1	0.856358	-0.311946	2.02466	26.2008	1.77897	0.123884	0.215065	-5.58345	0.0669451	0.481379
A0A0B4LI25	A0A0B4LI25	ncd	FALSE	0	0.227849	-0.0886753	0.544374	31.1102	1.74706	0.129547	0.22134	-5.62649	0.0688984	0.130418
A0A0B4LI86	A0A0B4LI86	RpII140	FALSE	0	-0.0375619	-0.246534	0.17141	31.8709	-0.436243	0.67742	0.758947	-6.94679	0.236244	0.0861033
A0A0B4LIF3	A0A0B4LIF3	Nelf-A	FALSE	0	0.0147089	-0.164296	0.193714	26.9795	0.199427	0.848299	0.888805	-7.03195	0.276666	0.0737557
A0A0B4LIF8	A0A0B4LIF8	pre-mod(mdg4)-J	FALSE	0	0.0327468	-0.312465	0.377959	25.525	0.230225	0.825315	0.874868	-7.02438	0.272328	0.142238
A0A0B4LIJ0	A0A0B4LIJ0	Rpt2	FALSE	0	0.0198937	-0.210233	0.25002	25.9938	0.209805	0.840534	0.884136	-7.02952	0.275213	0.0948196
A0A0C4DHA1	A0A0C4DHA1	Cdep	TRUE	5	-0.0999056	-0.409624	0.209813	24.7826	-0.782873	0.462503	0.567758	-6.71808	0.176731	0.127614
A0A0C4DHE8	A0A0C4DHE8	RpS29	FALSE	0	-0.195196	-0.464895	0.0745024	26.8051	-1.75655	0.127837	0.218905	-5.61372	0.0681404	0.111125
A0A0C4DHG4	A0A0C4DHG4	CG10265	FALSE	0	-0.0939129	-0.44122	0.253394	26.0568	-0.656268	0.535199	0.639243	-6.81489	0.198983	0.143102
A0A0C4DHG5	A0A0C4DHG5	B52	FALSE	0	-0.0125303	-0.229011	0.20395	31.4222	-0.140479	0.892728	0.924632	-7.04344	0.287818	0.089197
A0A0S0WNN6	A0A0S0WNN6	emb	TRUE	1	0.212885	-0.109711	0.535482	24.5056	1.6016	0.158693	0.256852	-5.81919	0.0799525	0.13292
A0A126GUM1	A0A126GUM1	psq	FALSE	0	-0.212363	-0.611167	0.186441	26.2908	-1.29237	0.242232	0.351479	-6.20317	0.109408	0.16432
A0A126GUM8	A0A126GUM8	lig	FALSE	0	-1.19818	-1.45746	-0.938904	31.6888	-11.2156	2.36611e-05	0.00307637	3.46699	0.000957608	0.106832
A0A126GUS7	A0A126GUS7	Fmr1	TRUE	5	0.732751	-0.0817167	1.54722	24.8928	2.18349	0.0701933	0.142168	-5.02119	0.0442538	0.335587
A0A126GUT1	A0A126GUT1	Tctp	TRUE	6	-0.243863	-1.39653	0.908805	24.821	-0.513464	0.625379	0.717388	-6.90602	0.223307	0.474936
A0A126GUU7	A0A126GUU7	Bin1	FALSE	0	0.0936332	-0.262026	0.449293	29.9554	0.638947	0.545689	0.649248	-6.827	0.202097	0.146543
A0A126GUW2	A0A126GUW2	l(3)07882	FALSE	0	-0.0298703	-0.219951	0.16021	29.8842	-0.381391	0.715622	0.787954	-6.97195	0.245273	0.0783192
A0A126GUY7	A0A126GUY7	pre-mod(mdg4)-N	TRUE	1	0.57708	-0.616736	1.7709	26.3503	1.17319	0.283747	0.395495	-6.33894	0.123109	0.491891
A0A126GUZ1	A0A126GUZ1	pre-mod(mdg4)-V	FALSE	0	-0.445663	-0.660125	-0.231202	27.9	-5.04343	0.00212437	0.015986	-1.29048	0.0049761	0.0883651
A0A126GV10	A0A126GV10	spas	TRUE	7	0.547129	0.269766	0.824492	24.4367	4.78751	0.00276885	0.0188184	-1.57875	0.00585776	0.114283
A0A126GV30	A0A126GV30	Apc	TRUE	6	0.0634792	-0.648541	0.775499	24.5368	0.216375	0.835629	0.882148	-7.02792	0.274594	0.293375
A0A1Z1CGZ3	A0A1Z1CGZ3	CG5316	TRUE	6	-0.622601	-0.983808	-0.261394	24.7157	-4.18334	0.00536909	0.0262641	-2.29845	0.00817544	0.148829
A0A4D6K557	A0A4D6K557		FALSE	0	0.507507	0.0691821	0.945832	27.8103	2.81005	0.029643	0.078099	-4.13034	0.0243105	0.180604
A1A708	A1A708	CG4951	TRUE	1	0.732272	-0.557553	2.0221	25.9737	1.37788	0.215835	0.323437	-6.10118	0.100679	0.53145
A1YK02	A1YK02	Nup75	FALSE	0	0.357598	0.045211	0.669986	30.1136	2.77825	0.0309386	0.0808192	-4.1753	0.0251573	0.128714
A1Z6E6	A1Z6E6	d4	FALSE	0	-0.267008	-0.61395	0.0799343	25.8077	-1.86782	0.109359	0.196462	-5.46232	0.0611545	0.142951
A1Z6H7	A1Z6H7	Gp210	FALSE	0	0.517148	0.27008	0.764217	33.0567	5.08003	0.00204685	0.0158786	-1.25004	0.00494268	0.1018
A1Z6M0	A1Z6M0	Bap170	FALSE	0	0.20608	0.0199809	0.39218	28.2344	2.68757	0.0349748	0.0885167	-4.30383	0.0275533	0.076679
A1Z6Q0	A1Z6Q0	koi	FALSE	0	-0.390933	-0.616225	-0.165641	29.9651	-4.21138	0.00520039	0.0258505	-2.26381	0.00804669	0.0928277
A1Z6Z3	A1Z6Z3	Aldh-III	FALSE	0	-0.275962	-0.528346	-0.0235775	27.8067	-2.65372	0.0366221	0.0902915	-4.35192	0.0281058	0.10399
A1Z729	A1Z729	CG2064	TRUE	2	-1.37172	-2.1239	-0.619534	25.1554	-4.42598	0.00408907	0.0228447	-2.00272	0.00711105	0.309924
A1Z768	A1Z768	rnh1	TRUE	4	0.547804	0.100591	0.995017	24.2756	2.97289	0.0238613	0.0674892	-3.90133	0.021008	0.184266
A1Z784	A1Z784	ACC	FALSE	0	-0.786133	-1.14527	-0.426999	29.8265	-5.31262	0.00162289	0.0144477	-0.997591	0.00449725	0.147975
A1Z7H3	A1Z7H3	Acsl	FALSE	0	-0.00806642	-0.237557	0.221424	27.0426	-0.0853071	0.934701	0.955224	-7.05061	0.297341	0.0945574
A1Z7J7	A1Z7J7	Sec31	TRUE	2	-0.962614	-1.41633	-0.508896	25.1402	-5.14913	0.00190906	0.0152725	-1.17422	0.004754	0.186947
A1Z7K2	A1Z7K2	CG30349	FALSE	0	0.112186	-0.0662017	0.290574	29.8268	1.52631	0.176131	0.280349	-5.91627	0.0872666	0.0735016
A1Z7K8	A1Z7K8	AIMP1	FALSE	0	-0.946624	-1.12165	-0.771595	27.501	-13.1261	9.225e-06	0.00182951	4.38721	0.000569487	0.0721177
A1Z7L1	A1Z7L1	FANCI	TRUE	3	0.444613	0.127894	0.761332	24.5345	3.40704	0.0136246	0.0467025	-3.30386	0.0145375	0.130498
A1Z7P7	A1Z7P7	Su(var)2-10	FALSE	0	0.0198163	-0.150212	0.189845	28.4916	0.28286	0.786477	0.843007	-7.00899	0.26241	0.0700571
A1Z818	A1Z818	tea	TRUE	3	-0.0138932	-0.649627	0.621841	24.8553	-0.0530389	0.959366	0.970742	-7.05318	0.302171	0.261943
A1Z830	A1Z830	CG12128	FALSE	0	-0.369606	-0.571485	-0.167728	27.9628	-4.44343	0.00401113	0.0226892	-1.98181	0.00706267	0.0831805
A1Z898	A1Z898	Caf1-105	TRUE	1	-0.849676	-1.66384	-0.0355127	25.8456	-2.53286	0.043207	0.10196	-4.52398	0.0317381	0.335462
A1Z8D0	A1Z8D0	nclb	TRUE	3	-0.272696	-0.690083	0.14469	24.8065	-1.58566	0.162244	0.26095	-5.83991	0.0812281	0.171977
A1Z8D5	A1Z8D5	CG18004	FALSE	0	0.284741	0.035518	0.533963	27.4488	2.77288	0.0311633	0.0812678	-4.1829	0.0252969	0.102688
A1Z8J0	A1Z8J0	CG7741	TRUE	4	0.293751	0.0174523	0.570049	24.4784	2.58029	0.0404846	0.0977741	-4.4564	0.030435	0.113844
A1Z8M2	A1Z8M2	tou	FALSE	0	0.358575	0.170675	0.546475	27.2495	4.63151	0.00326866	0.0204925	-1.75926	0.00637887	0.0774208
A1Z8R2	A1Z8R2	ADD1	FALSE	0	-0.247262	-0.424063	-0.0704616	25.0862	-3.39424	0.013846	0.0469481	-3.32115	0.014614	0.0728477
A1Z8S6	A1Z8S6	pds5	FALSE	0	0.396135	0.170007	0.622263	26.3898	4.25165	0.00496842	0.0253538	-2.21429	0.0078921	0.0931721
A1Z8U0	A1Z8U0	Prp8	FALSE	0	0.484802	0.3203	0.649303	31.8596	7.15258	0.000322451	0.00643226	0.749737	0.00200222	0.0677799
A1Z909	A1Z909	CG8545	FALSE	0	0.0889502	-0.0850214	0.262922	30.73	1.2409	0.259465	0.370044	-6.26277	0.115187	0.0716819
A1Z934	A1Z934	CG8778	TRUE	1	-0.467254	-0.890686	-0.0438226	25.3765	-2.67817	0.0354242	0.0889078	-4.31718	0.0276751	0.174468
A1Z968	A1Z968	NAT1	FALSE	0	-1.08543	-1.38106	-0.789798	27.616	-8.91083	9.16836e-05	0.0038264	2.08168	0.00119108	0.12181
A1Z987	A1Z987	Cap-G	FALSE	0	0.444723	0.274727	0.614718	27.6787	6.34921	0.000624715	0.00807662	0.0378592	0.00251408	0.0700438
A1Z9E2	A1Z9E2	mip120	FALSE	0	0.649215	0.478999	0.81943	28.9002	9.25672	7.34364e-05	0.00341813	2.31274	0.00106399	0.0701344
A1Z9E3	A1Z9E3	mEFTu1	FALSE	0	-0.512565	-0.886769	-0.138361	27.5046	-3.32437	0.0151266	0.0500474	-3.41591	0.0155787	0.154184
A1Z9G2	A1Z9G2	fand	FALSE	0	0.705941	0.33011	1.08177	27.1103	4.55873	0.00353595	0.0211591	-1.84474	0.00658638	0.154855
A1Z9I5	A1Z9I5	tum	FALSE	0	0.126591	-0.154661	0.407844	30.261	1.09239	0.315219	0.426212	-6.42622	0.132671	0.115885
A1Z9J1	A1Z9J1	shot	TRUE	5	0.177015	-0.69563	1.04966	24.6854	0.492314	0.639418	0.730764	-6.9178	0.227471	0.359558
A1Z9J3	A1Z9J3	shot	FALSE	0	0.530766	0.0346019	1.02693	29.0871	2.59625	0.0396101	0.0962249	-4.43368	0.0299528	0.204436
A1Z9L3	A1Z9L3	pea	FALSE	0	0.403721	-0.0624295	0.869872	26.9777	2.10196	0.0786952	0.152429	-5.13633	0.0474477	0.192069
A1Z9S6	A1Z9S6	Su(var)2-HP2	FALSE	0	0.0995504	-0.0933668	0.292468	29.5688	1.25239	0.255527	0.366128	-6.24959	0.113968	0.0794881
A1Z9S8	A1Z9S8	CG12863	FALSE	0	-0.169339	-0.51014	0.171461	25.9347	-1.20594	0.271768	0.381917	-6.30242	0.118883	0.140421
A1ZA22	A1ZA22	eIF2Bgamma	FALSE	0	-0.269196	-0.476771	-0.061621	24.7087	-3.14747	0.0189848	0.0592695	-3.65851	0.0184493	0.0855277
A1ZA92	A1ZA92	CG8414	FALSE	0	0.141231	-0.0208507	0.303313	30.0907	2.11478	0.0772918	0.150517	-5.11826	0.0468528	0.066783
A1ZAK1	A1ZAK1	IntS8	TRUE	2	1.55492	0.929395	2.18045	25.8466	6.03297	0.000825132	0.00931745	-0.263213	0.00290032	0.257737
A1ZAK9	A1ZAK9	Psi	TRUE	3	-1.36745	-1.7603	-0.974611	25.4657	-8.44815	0.000124867	0.00416946	1.75783	0.00129786	0.161864
A1ZAV3	A1ZAV3	MESR4	FALSE	0	0.249859	-0.00710748	0.506826	28.2311	2.35987	0.0548786	0.119735	-4.77058	0.037271	0.105879
A1ZBB4	A1ZBB4	CG30122	FALSE	0	-0.144062	-0.323499	0.0353736	28.7067	-1.94854	0.0976291	0.179806	-5.35089	0.0559698	0.0739335
A1ZBE9	A1ZBE9	MetRS	FALSE	0	0.0787147	-0.13703	0.29446	29.9901	0.885491	0.408868	0.517776	-6.62947	0.161173	0.0888938
A1ZBJ2	A1ZBJ2	CG7461	FALSE	0	0.0910764	-0.180063	0.362215	25.2344	0.815234	0.445072	0.549985	-6.69108	0.171198	0.111718
A1ZBT5	A1ZBT5	MED8	TRUE	7	-0.279278	-0.738291	0.179736	24.6378	-1.47666	0.188594	0.292565	-5.97914	0.0910692	0.189128
A1ZBW1	A1ZBW1	HnRNP-K	FALSE	0	-0.693712	-0.93207	-0.455354	28.1699	-7.06347	0.000345953	0.00648715	0.674306	0.00201931	0.0982113
A1ZBW6	A1ZBW6	CG11180	FALSE	0	-0.0823744	-0.255379	0.0906306	27.832	-1.15559	0.290368	0.402532	-6.35829	0.125299	0.0712837
A4V2B8	A4V2B8	CkIIalpha	FALSE	0	0.0635495	-0.139686	0.266785	30.2101	0.758895	0.475725	0.580853	-6.73751	0.180807	0.0837396
A4V2K7	A4V2K7	D1	FALSE	0	0.347256	-0.0707422	0.765255	32.1864	2.01625	0.0887645	0.166735	-5.25659	0.0519012	0.172229
A4V2S3	A4V2S3	CtBP	FALSE	0	-0.126656	-0.328155	0.0748423	28.3353	-1.52554	0.176318	0.280357	-5.91725	0.0872691	0.0830238
A4V303	A4V303	CCT3	FALSE	0	-0.131511	-0.480653	0.217632	26.0744	-0.914171	0.394735	0.50484	-6.60318	0.157146	0.143858
A4V391	A4V391	CCT1	FALSE	0	-0.393862	-0.694621	-0.0931031	26.6598	-3.1783	0.018242	0.0575352	-3.61598	0.0179095	0.123922
A4V3G8	A4V3G8	ball	FALSE	0	-0.129833	-0.372403	0.112737	29.5549	-1.29902	0.24008	0.350203	-6.19537	0.109011	0.0999466
A4V3J6	A4V3J6	Hrb98DE	FALSE	0	-0.372055	-0.69927	-0.0448396	32.8934	-2.75957	0.0317272	0.0820422	-4.20173	0.025538	0.134823
A4V4A1	A4V4A1	Klp10A	FALSE	0	0.0865636	-0.168012	0.341139	28.3481	0.825254	0.439772	0.545629	-6.68254	0.169843	0.104893
A4V4A5	A4V4A5	Ran	FALSE	0	-0.285116	-0.439985	-0.130246	29.1738	-4.4681	0.00390371	0.0223335	-1.95231	0.00695193	0.0638114
A4V4I8	A4V4I8	shi	FALSE	0	0.206333	0.0112533	0.401412	26.7745	2.567	0.041229	0.0988014	-4.47534	0.0307548	0.080379
A8DYB0	A8DYB0	CG13185	FALSE	0	1.04879	-0.829445	2.92703	25.9758	1.35521	0.222569	0.330305	-6.12856	0.102817	0.773894
A8DYD2	A8DYD2	cg	FALSE	0	0.0344855	-0.181491	0.250462	29.2276	0.387525	0.711303	0.78545	-6.96929	0.244494	0.0889891
A8DYI6	A8DYI6	Phb2	FALSE	0	-0.421353	-0.836804	-0.00590338	29.8719	-2.46148	0.0476719	0.109453	-4.62573	0.0340703	0.171179
A8DYK5	A8DYK5	CG4266	FALSE	0	0.0384083	-0.16337	0.240186	26.8861	0.461977	0.659841	0.750197	-6.93389	0.23352	0.0831391
A8DYV8	A8DYV8	CG34179	TRUE	4	0.277138	-0.581571	1.13585	24.7531	0.783282	0.46228	0.567758	-6.71775	0.176731	0.353816
A8JNL9	A8JNL9	CG10274	TRUE	4	-0.792229	-1.37028	-0.214174	25.0434	-3.32622	0.0150911	0.0500474	-3.4134	0.0155787	0.238177
A8JUV0	A8JUV0	sno	FALSE	0	0.102171	-0.134387	0.338729	25.5708	1.04823	0.333605	0.443271	-6.47214	0.137981	0.0974696
A8JUY3	A8JUY3	RpIIIC160	TRUE	2	1.37931	0.140498	2.61812	26.1837	2.70225	0.0342853	0.0874788	-4.283	0.0272303	0.510431
A8Y560	A8Y560	RpL15	FALSE	0	0.250595	0.0497542	0.451435	31.9794	3.02823	0.022183	0.0653993	-3.82402	0.0203574	0.0827528
B7YZQ1	B7YZQ1	Slik	FALSE	0	0.0285785	-0.415209	0.472366	28.0537	0.156291	0.880762	0.914853	-7.04075	0.284774	0.182855
B7YZQ7	B7YZQ7	Nurf-38	FALSE	0	-0.14034	-0.328099	0.0474195	26.6	-1.81404	0.117937	0.20703	-5.53584	0.0644439	0.0773629
B7Z0D7	B7Z0D7	CG7504	FALSE	0	0.331515	0.0707798	0.592251	26.5483	3.08583	0.0205708	0.0623209	-3.74389	0.0193992	0.107431
B7Z0G1	B7Z0G1	hay	FALSE	0	-0.0130871	-0.322888	0.296714	26.2385	-0.102525	0.921571	0.946212	-7.04874	0.294535	0.127648
B7Z0I8	B7Z0I8	CG42232	FALSE	0	0.301391	0.062512	0.540269	32.4988	3.06211	0.0212188	0.063906	-3.77685	0.0198926	0.0984257
B7Z0R6	B7Z0R6	Doa	FALSE	0	0.279396	0.120086	0.438707	29.6704	4.25642	0.00494168	0.0253014	-2.20843	0.00787579	0.0656411
B7Z0V1	B7Z0V1	Taf7	FALSE	0	0.126385	-0.14274	0.395511	26.6011	1.13975	0.296435	0.408363	-6.37555	0.127115	0.110888
B7Z120	B7Z120	Tlk	FALSE	0	-0.487902	-0.698617	-0.277188	28.4746	-5.61962	0.00120725	0.0120412	-0.676046	0.00374815	0.0868212
C0HL67	C0HL67		FALSE	0	-2.62174	-3.55077	-1.69271	30.9516	-6.849	0.000410998	0.00692252	0.489261	0.00215483	0.382791
C7LA75	C7LA75	Hsc70-4	FALSE	0	0.351869	0.187804	0.515934	32.7396	5.20517	0.001805	0.0150678	-1.11325	0.0046903	0.0676
C9QP42	C9QP42	eIF4A	FALSE	0	-0.0367073	-0.257366	0.183952	27.7042	-0.403737	0.699942	0.777376	-6.96208	0.241981	0.0909187
D2NUK9	D2NUK9	hoip	FALSE	0	-0.615327	-0.85997	-0.370685	30.4036	-6.1044	0.000774138	0.00900815	-0.194121	0.00280404	0.100801
D5AEK7	D5AEK7	Agpat3	FALSE	0	-0.15166	-0.41669	0.11337	28.0182	-1.38882	0.212651	0.319601	-6.08787	0.0994851	0.109201
E1JGK7	E1JGK7	lolal	FALSE	0	-0.130624	-0.35836	0.097111	26.1725	-1.39207	0.211711	0.319125	-6.0839	0.0993367	0.0938343
E1JGZ8	E1JGZ8	LRR	FALSE	0	0.0953629	-0.174519	0.365244	26.9351	0.857581	0.422981	0.529071	-6.65442	0.164688	0.1112
E1JH57	E1JH57	mars	FALSE	0	0.232064	-0.110778	0.574907	28.237	1.64279	0.149858	0.247152	-5.76527	0.076933	0.141262
E1JH79	E1JH79	Mlf	FALSE	0	-0.0815291	-0.266834	0.103776	28.6057	-1.06781	0.325347	0.436448	-6.45193	0.135857	0.0763516
E1JHA4	E1JHA4	Hrb27C	FALSE	0	-0.749309	-1.04137	-0.457244	32.0285	-6.22658	0.000695004	0.00843633	-0.0774173	0.00262605	0.12034
E1JHK0	E1JHK0	CLIP-190	FALSE	0	-0.409678	-0.745224	-0.0741329	25.853	-2.9632	0.0241692	0.0678681	-3.9149	0.0211259	0.138256
E1JI11	E1JI11	Taf4	FALSE	0	0.272618	0.111818	0.433417	28.0024	4.1147	0.00580829	0.0271352	-2.38374	0.00844662	0.0662546
E1JI58	E1JI58	Sin	TRUE	1	0.101011	-0.181337	0.383359	24.6035	0.868265	0.417537	0.525255	-6.64494	0.163501	0.116337
E1JIC9	E1JIC9	TfIIEbeta	TRUE	6	-0.258417	-0.784461	0.267628	24.4843	-1.19225	0.276723	0.386757	-6.31776	0.120389	0.216747
E1JIK0	E1JIK0	Hrb87F	FALSE	0	-0.217787	-0.542487	0.106912	33.3629	-1.62787	0.153003	0.251082	-5.78487	0.0781564	0.133787
E1JIP3	E1JIP3	WRNexo	TRUE	3	-1.06884	-2.44588	0.30821	25.5218	-1.88379	0.106933	0.19369	-5.44038	0.0602916	0.567388
E1JIT0	E1JIT0	how	TRUE	2	-1.29476	-1.61806	-0.971462	25.45	-9.71969	5.5178e-05	0.00307637	2.60821	0.000957608	0.13321
E1JIT7	E1JIT7	Efa6	TRUE	4	-0.695252	-1.55927	0.168766	25.231	-1.95294	0.0970278	0.179128	-5.3448	0.0557588	0.356003
E1JIV0	E1JIV0	CG5902	TRUE	7	0.154099	-0.268288	0.576485	24.6145	0.885437	0.408895	0.517776	-6.62952	0.161173	0.174037
E1JIZ7	E1JIZ7	CG42487	TRUE	5	0.321447	-0.254903	0.897796	24.6195	1.3536	0.223054	0.330706	-6.1305	0.102942	0.237475
E1JJ68	E1JJ68	Rm62	FALSE	0	0.0968675	-0.0976238	0.291359	32.8968	1.20878	0.270752	0.381011	-6.29923	0.118601	0.0801367
E1JJ72	E1JJ72	Taf1	FALSE	0	0.138105	-0.0757137	0.351924	29.9341	1.56759	0.166359	0.266729	-5.86329	0.0830272	0.0881003
E1JJ73	E1JJ73	CG1307	TRUE	3	-0.541824	-1.18891	0.105264	24.6296	-2.03219	0.0867982	0.164392	-5.2343	0.0511717	0.266621
E1JJD6	E1JJD6	tyf	TRUE	3	-1.06951	-1.54385	-0.595182	25.2019	-5.47233	0.00138936	0.0130428	-0.828688	0.00405995	0.195441
E1JJI5	E1JJI5	CkIalpha	FALSE	0	0.0933558	-0.0776333	0.264345	28.3061	1.32508	0.231814	0.339757	-6.16459	0.105759	0.0704531
E1JJM9	E1JJM9	RpS15Aa	FALSE	0	-0.238085	-0.480255	0.0040852	28.0275	-2.38605	0.0529189	0.117368	-4.73326	0.0365342	0.0997818
E1JJN9	E1JJN9	Set2	FALSE	0	0.38364	0.0851189	0.682162	25.9067	3.11901	0.0196999	0.0606173	-3.69788	0.0188689	0.123
E1JJS2	E1JJS2	RhoGAP19D	FALSE	0	-0.138242	-0.316668	0.0401841	25.3902	-1.8804	0.107443	0.194156	-5.44503	0.0604366	0.0735174
E2QC83	E2QC83	Pabp2	FALSE	0	-0.116182	-0.368861	0.136496	29.3289	-1.11594	0.305759	0.418579	-6.4012	0.130295	0.104112
E2QCG7	E2QCG7	eIF3b	FALSE	0	-0.012414	-0.477134	0.452306	27.9693	-0.0648318	0.950345	0.966069	-7.05238	0.300716	0.19148
E2QCY2	E2QCY2	CG3961	FALSE	0	0.170573	-0.202085	0.543232	27.5493	1.11088	0.30777	0.420065	-6.4066	0.130757	0.153547
E2QD64	E2QD64	NO66	FALSE	0	0.196883	-0.0195485	0.413315	29.9589	2.20778	0.0678462	0.139321	-4.98678	0.0433675	0.0891769
E2QD65	E2QD65	RpS19a	FALSE	0	-0.361769	-0.553556	-0.169981	27.6967	-4.57804	0.00346271	0.0210018	-1.82198	0.00653742	0.0790226
E2QD75	E2QD75	Cbp80	FALSE	0	0.512159	0.271554	0.752764	28.8447	5.16617	0.00187673	0.0151757	-1.15564	0.00472387	0.099137
E4NKG1	E4NKG1	Capr	FALSE	0	-0.770391	-1.04955	-0.491228	28.9185	-6.69766	0.000465342	0.00715773	0.355617	0.00222805	0.115024
E8NH77	E8NH77	sw	FALSE	0	-0.411176	-0.693909	-0.128443	26.9481	-3.52955	0.0116906	0.0415667	-3.13944	0.0129388	0.116495
E8NHB1	E8NHB1	Taf2	FALSE	0	0.189628	0.00406317	0.375192	28.8255	2.48014	0.04646	0.107474	-4.59913	0.0334543	0.0764585
F2FBA6	F2FBA6	Dsp1	FALSE	0	-0.152275	-0.352232	0.0476812	26.5923	-1.84826	0.112406	0.200529	-5.48913	0.0624204	0.0823885
F3YDH0	F3YDH0	Hsc70-3	FALSE	0	0.188561	-0.070778	0.4479	29.2375	1.76463	0.1264	0.217901	-5.60283	0.0678279	0.106856
G3M3A2	G3M3A2	RpS3	FALSE	0	-0.237216	-0.531276	0.0568444	31.2803	-1.95784	0.0963618	0.178542	-5.33799	0.0555764	0.121162
H0RNK7	H0RNK7	Rtf1	FALSE	0	0.021653	-0.192829	0.236135	25.9877	0.245016	0.81434	0.865624	-7.02037	0.26945	0.0883736
H0RNN8	H0RNN8	CG13096	FALSE	0	0.265725	0.012855	0.518596	30.8466	2.55037	0.0421799	0.100447	-4.49902	0.031267	0.104191
H8F4P0	H8F4P0	MED1	FALSE	0	0.482691	0.205868	0.759513	26.049	4.23191	0.00508063	0.0256706	-2.23853	0.0079907	0.11406
L0MLK7	L0MLK7	zfh2	FALSE	0	0.170682	-0.0670749	0.40844	24.9419	1.7423	0.130414	0.222079	-5.63289	0.0691286	0.0979637
M9MQH9	M9MQH9	Pp2A-29B	FALSE	0	0.304222	0.00290047	0.605543	26.7226	2.45036	0.0484102	0.110488	-4.64159	0.0343924	0.124154
M9MRC9	M9MRC9	RpL27A	FALSE	0	0.063031	-0.183317	0.309379	30.7342	0.620976	0.556707	0.658785	-6.83925	0.205065	0.101503
M9MRF2	M9MRF2	RpL37A	FALSE	0	-0.354276	-0.881588	0.173037	27.0645	-1.63058	0.152427	0.250405	-5.78131	0.0779456	0.21727
M9MRG4	M9MRG4	Utx	FALSE	0	0.147892	-0.0698693	0.365654	25.8473	1.64829	0.148715	0.246149	-5.75803	0.0766208	0.0897248
M9MRJ4	M9MRJ4	Msp300	FALSE	0	-0.23568	-0.424196	-0.0471634	30.7354	-3.03418	0.0220102	0.0650148	-3.81573	0.0202377	0.0776748
M9MRM4	M9MRM4	Sac1	FALSE	0	0.0293292	-0.277408	0.336066	28.0677	0.232062	0.823949	0.874339	-7.0239	0.272163	0.126386
M9MS35	M9MS35	Cfp1	FALSE	0	0.190688	-0.0582304	0.439607	25.4772	1.85924	0.110686	0.19815	-5.47409	0.06168	0.102563
M9MSJ7	M9MSJ7	CG42676	FALSE	0	0.567037	0.261057	0.873017	29.2715	4.49766	0.00377924	0.0218902	-1.91708	0.00681394	0.126074
M9MSQ1	M9MSQ1	CG5004	FALSE	0	-0.183025	-0.53939	0.173341	25.1319	-1.24647	0.257549	0.367996	-6.25639	0.114549	0.146834
M9NCM6	M9NCM6	spen	FALSE	0	0.39238	0.167958	0.616801	26.588	4.24337	0.00501515	0.0254233	-2.22445	0.00791373	0.0924689
M9NCS8	M9NCS8	Glt	FALSE	0	-0.432906	-0.677024	-0.188788	28.3789	-4.30391	0.00468441	0.0246999	-2.15038	0.00768856	0.100584
M9ND19	M9ND19	Gale	FALSE	0	-0.590229	-0.744855	-0.435603	27.9586	-9.2642	7.30905e-05	0.00341813	2.31764	0.00106399	0.0637107
M9ND28	M9ND28	Spn	FALSE	0	-0.623975	-0.976194	-0.271755	27.1252	-4.29954	0.00470744	0.0246999	-2.1557	0.00768856	0.145126
M9NDC3	M9NDC3	Fs(2)Ket	FALSE	0	0.464881	0.17295	0.756812	29.4509	3.86483	0.00778019	0.0321246	-2.70026	0.00999971	0.120285
M9NDH8	M9NDH8	mRpS6	TRUE	4	-0.00799069	-0.406928	0.390947	24.6548	-0.0486125	0.962754	0.972249	-7.05344	0.30264	0.164375
M9NDM4	M9NDM4	wds	FALSE	0	0.238613	0.0139569	0.463268	27.1052	2.57777	0.0406247	0.0979225	-4.45999	0.0304812	0.0925654
M9NDP0	M9NDP0	CG9932	FALSE	0	0.313475	0.157627	0.469323	24.3362	4.88168	0.00250902	0.0177598	-1.47154	0.00552823	0.0642145
M9NDP1	M9NDP1	ctp	FALSE	0	-0.0532153	-0.425118	0.318688	27.947	-0.347277	0.739852	0.807684	-6.98597	0.251415	0.153236
M9NDS8	M9NDS8	Mbs	FALSE	0	-0.18307	-0.499786	0.133646	25.499	-1.40286	0.208625	0.316336	-6.07071	0.0984687	0.130497
M9NDW1	M9NDW1	DIP2	TRUE	1	-1.15644	-1.76706	-0.545814	25.4042	-4.59639	0.00339468	0.0209692	-1.8004	0.00652726	0.251597
M9NDX3	M9NDX3	Top1	FALSE	0	-0.171256	-0.34638	0.00386791	31.9116	-2.37339	0.0538573	0.118178	-4.75131	0.0367864	0.0721567
M9NE89	M9NE89	Lam	FALSE	0	0.215065	0.0493901	0.38074	34.1233	3.15052	0.01891	0.0591565	-3.65431	0.0184141	0.0682635
M9NEA5	M9NEA5	ct	FALSE	0	0.515919	0.115044	0.916795	28.2588	3.1235	0.0195853	0.0605293	-3.69167	0.0188415	0.165174
M9NEF4	M9NEF4	CG17233	FALSE	0	-0.486355	-0.802136	-0.170573	27.0328	-3.73796	0.00905793	0.035487	-2.86454	0.0110463	0.130112
M9NEL3	M9NEL3	kis	FALSE	0	0.165077	-0.00370617	0.33386	30.5998	2.3737	0.053834	0.118178	-4.75086	0.0367864	0.069544
M9NEQ9	M9NEQ9	RpS10b	FALSE	0	-0.86777	-1.1506	-0.584937	27.527	-7.44634	0.000256978	0.00563883	0.992512	0.00175525	0.116537
M9NEU5	M9NEU5	chic	FALSE	0	-0.229544	-0.432935	-0.0261533	26.4466	-2.73907	0.0326179	0.0837812	-4.23077	0.0260793	0.0838036
M9NEV0	M9NEV0	lid	FALSE	0	-0.0216316	-0.273662	0.230398	26.5178	-0.208308	0.841654	0.884136	-7.02988	0.275213	0.103844
M9NEY8	M9NEY8	Tet	TRUE	7	0.285742	0.045602	0.525881	24.4647	2.88788	0.0267117	0.0732665	-4.02062	0.0228063	0.0989453
M9NF33	M9NF33	Cpsf6	FALSE	0	-0.0097231	-0.218972	0.199526	31.2193	-0.112774	0.913767	0.940715	-7.04748	0.292824	0.0862174
M9NF67	M9NF67	nbs	TRUE	6	0.188565	-0.282716	0.659847	24.5376	0.971069	0.367803	0.476747	-6.54916	0.148401	0.194183
M9NFE1	M9NFE1	CG14200	FALSE	0	0.43041	0.0960773	0.764742	25.8965	3.12444	0.0195613	0.0605293	-3.69037	0.0188415	0.137756
M9NFR5	M9NFR5	yps	FALSE	0	-0.27965	-0.520718	-0.0385822	25.7022	-2.81543	0.02943	0.0778045	-4.12275	0.0242189	0.0993277
M9NH51	M9NH51	U2af50	FALSE	0	-0.173742	-0.347826	0.000342296	28.6414	-2.42222	0.0503314	0.114194	-4.6817	0.035546	0.0717284
M9PB45	M9PB45	CG14005	TRUE	3	0.278943	-0.207855	0.765741	24.6835	1.39071	0.212105	0.319406	-6.08557	0.0994241	0.200577
M9PB84	M9PB84	RpS2	FALSE	0	-0.156114	-0.329165	0.0169361	29.8603	-2.18947	0.069608	0.141426	-5.01273	0.0440228	0.0713024
M9PB96	M9PB96	CG6724	FALSE	0	-0.0363145	-0.244787	0.172158	27.042	-0.422766	0.686716	0.767124	-6.95326	0.238789	0.0858974
M9PBE2	M9PBE2	Hakai	FALSE	0	0.200132	-0.0956273	0.495892	28.02	1.64228	0.149964	0.247152	-5.76594	0.076933	0.121863
M9PBH8	M9PBH8	CG2199	FALSE	0	0.193981	0.00206013	0.385902	31.4127	2.45305	0.0482306	0.110396	-4.63776	0.0343639	0.0790776
M9PBK5	M9PBK5	RpLP1	FALSE	0	-0.221998	-0.399345	-0.0446507	26.9805	-3.03804	0.0218992	0.0649742	-3.81036	0.0202251	0.0730729
M9PBL3	M9PBL3	Hsp83	FALSE	0	0.0472355	-0.159408	0.253879	29.3502	0.554774	0.598448	0.694336	-6.88172	0.216132	0.0851437
M9PBM1	M9PBM1	U2af38	FALSE	0	-0.388655	-0.74028	-0.0370312	28.9925	-2.68259	0.0352122	0.0886654	-4.3109	0.0275996	0.144881
M9PBM2	M9PBM2	enc	FALSE	0	-1.07724	-1.44006	-0.71441	26.7789	-7.20578	0.000309293	0.00635886	0.794365	0.00197938	0.149496
M9PBN7	M9PBN7	cpb	TRUE	3	-0.331179	-1.26396	0.601606	24.8186	-0.861688	0.420882	0.527712	-6.65079	0.164265	0.384338
M9PBZ9	M9PBZ9	eIF4E1	FALSE	0	-0.938995	-1.46674	-0.411246	27.3319	-4.31822	0.00460984	0.0245545	-2.13295	0.0076433	0.21745
M9PC85	M9PC85	x16	FALSE	0	-0.226353	-0.454957	0.00225099	28.9747	-2.4031	0.0516828	0.11589	-4.70897	0.0360741	0.0941921
M9PC89	M9PC89	snRNP-U1-70K	FALSE	0	-0.228318	-0.461328	0.00469221	29.9182	-2.37812	0.0535047	0.118178	-4.74457	0.0367864	0.0960077
M9PCF6	M9PCF6	lilli	TRUE	6	-0.435583	-0.920006	0.0488397	24.7931	-2.1823	0.0703101	0.142168	-5.02287	0.0442538	0.199598
M9PCH8	M9PCH8	baf	FALSE	0	-0.261278	-0.502279	-0.0202777	27.77	-2.6312	0.0377636	0.0923644	-4.38395	0.0287511	0.0993001
M9PCI2	M9PCI2	NHP2	FALSE	0	-0.140966	-0.369286	0.0873548	28.7438	-1.49843	0.18303	0.286872	-5.95168	0.0892972	0.0940754
M9PCQ8	M9PCQ8	chico	TRUE	5	-0.285423	-0.768792	0.197947	24.55	-1.43311	0.200192	0.305965	-6.03347	0.0952402	0.199164
M9PD08	M9PD08	eRF3	TRUE	6	-0.186467	-0.484813	0.111879	24.5924	-1.51688	0.178438	0.281397	-5.92828	0.0875928	0.122928
M9PD27	M9PD27	eRF1	FALSE	0	0.333429	-0.158622	0.82548	29.8659	1.64461	0.149479	0.246881	-5.76288	0.0768488	0.202741
M9PD43	M9PD43	CG16865	TRUE	1	-0.164726	-0.460784	0.131331	25.0955	-1.35038	0.224029	0.331511	-6.13437	0.103192	0.121985
M9PD50	M9PD50	skd	TRUE	3	-0.228915	-0.830044	0.372213	25.0712	-0.924221	0.389871	0.499451	-6.59382	0.155468	0.247684
M9PD94	M9PD94	crol	TRUE	1	-0.858329	-1.54756	-0.169101	25.3478	-3.02245	0.0223521	0.0655207	-3.83208	0.0203952	0.283984
M9PDC7	M9PDC7	Dap160	FALSE	0	-1.04872	-1.6061	-0.491337	26.6839	-4.56641	0.00350661	0.0211222	-1.83568	0.00657487	0.229659
M9PDU3	M9PDU3	ush	TRUE	4	0.138069	-0.594306	0.870445	24.9425	0.457542	0.662854	0.752012	-6.93616	0.234085	0.301762
M9PDU4	M9PDU4	ND-ACP	TRUE	1	0.503715	0.31506	0.692371	24.7233	6.48014	0.000558462	0.00767958	0.158935	0.00239049	0.0777321
M9PDV1	M9PDV1	dia	FALSE	0	0.185519	-0.165046	0.536085	26.1041	1.28437	0.244845	0.354795	-6.21254	0.11044	0.144444
M9PDW8	M9PDW8	CG34417	FALSE	0	-0.661606	-0.892297	-0.430915	29.2588	-6.96045	0.000375602	0.00670842	0.586046	0.00208819	0.0950522
M9PE12	M9PE12	E(bx)	FALSE	0	0.293694	0.129044	0.458343	30.7007	4.32916	0.00455373	0.0244564	-2.11965	0.00761275	0.0678409
M9PE73	M9PE73	Dhc64C	FALSE	0	0.586575	0.307898	0.865252	30.0457	5.10848	0.00198882	0.0155067	-1.21875	0.00482691	0.114824
M9PEB2	M9PEB2	Chd1	FALSE	0	-0.797496	-1.34549	-0.249505	25.31	-3.53203	0.0116548	0.04154	-3.13614	0.0129305	0.22579
M9PEJ2	M9PEJ2	Ist1	TRUE	6	-0.771773	-1.21062	-0.332929	24.7611	-4.26824	0.00487624	0.0251339	-2.19396	0.00782365	0.180818
M9PEY6	M9PEY6	Rat1	FALSE	0	-0.764281	-0.978076	-0.550487	27.8528	-8.67613	0.000107045	0.0039148	1.91959	0.00121859	0.0880901
M9PEZ4	M9PEZ4	thoc6	TRUE	4	0.047111	-0.251963	0.346185	24.7569	0.382308	0.714976	0.787807	-6.97155	0.245228	0.123228
M9PFF0	M9PFF0	RpL13	FALSE	0	0.0513567	-0.161137	0.263851	30.4916	0.586569	0.578179	0.676947	-6.86186	0.210719	0.0875544
M9PFL9	M9PFL9	cmet	TRUE	1	0.310091	-0.446726	1.06691	25.2569	0.994414	0.357176	0.464576	-6.52631	0.144612	0.311833
M9PFN1	M9PFN1	rept	FALSE	0	0.195232	0.0280529	0.362412	29.6931	2.83425	0.0286965	0.076657	-4.09618	0.0238617	0.0688833
M9PFP4	M9PFP4	Plp	TRUE	4	0.350759	-1.03035	1.73187	24.9593	0.616379	0.559547	0.661127	-6.84234	0.205795	0.569063
M9PFR0	M9PFR0	RhoGAP71E	TRUE	6	0.405892	-0.214832	1.02662	24.2707	1.58701	0.161939	0.260733	-5.83816	0.0811605	0.255758
M9PFR5	M9PFR5	Su(var)3-3	TRUE	3	0.208768	-0.201898	0.619433	24.6389	1.2338	0.261925	0.372861	-6.27089	0.116064	0.169207
M9PFS7	M9PFS7	Sfmbt	FALSE	0	0.169695	-0.0335917	0.372981	26.6358	2.02595	0.0875625	0.165026	-5.24303	0.051369	0.0837605
M9PFV9	M9PFV9	TfIIS	TRUE	7	0.267906	-0.197121	0.732932	24.4621	1.39821	0.20995	0.317093	-6.0764	0.0987043	0.191606
M9PFY2	M9PFY2	CG6479	FALSE	0	0.486986	0.194345	0.779627	27.563	4.03878	0.00634138	0.0284089	-2.47892	0.00884309	0.120578
M9PG47	M9PG47	RpS26	FALSE	0	-0.208706	-0.446277	0.0288644	27.6947	-2.13212	0.0754341	0.148357	-5.09381	0.0461803	0.0978868
M9PG50	M9PG50	Cdk12	FALSE	0	-0.204048	-0.510818	0.102721	28.6684	-1.61432	0.155914	0.254229	-5.8026	0.0791359	0.126399
M9PG55	M9PG55	CG10600	FALSE	0	-0.00791997	-0.226481	0.210642	27.4981	-0.0879465	0.932687	0.954435	-7.05034	0.297095	0.0900544
M9PG76	M9PG76	RpLP0	FALSE	0	0.0102505	-0.175759	0.19626	27.7168	0.133745	0.897834	0.928375	-7.0445	0.288983	0.0766419
M9PGC9	M9PGC9	SMC5	TRUE	1	0.225871	0.00943085	0.442312	24.9332	2.53274	0.0432137	0.10196	-4.52414	0.0317381	0.0891805
M9PGK3	M9PGK3	CG43736	FALSE	0	0.0206694	-0.218718	0.260057	26.6103	0.209554	0.840722	0.884136	-7.02958	0.275213	0.0986352
M9PGQ6	M9PGQ6	Bx42	FALSE	0	0.339804	0.138278	0.541329	28.5172	4.09228	0.00596031	0.0274103	-2.41175	0.00853223	0.0830352
M9PGS2	M9PGS2	usp	TRUE	6	-0.201317	-0.785158	0.382523	24.5952	-0.836865	0.433686	0.539386	-6.67254	0.167899	0.240561
M9PGW8	M9PGW8	bif	FALSE	0	0.424104	0.229209	0.618998	26.3327	5.28131	0.00167371	0.0144477	-1.03112	0.00449725	0.0803027
M9PH59	M9PH59	RpL37a	FALSE	0	0.152743	-0.171708	0.477194	26.9155	1.14257	0.295349	0.407963	-6.37249	0.12699	0.133684
M9PHK2	M9PHK2	Tao	TRUE	4	-0.252695	-0.925684	0.420295	24.7884	-0.911291	0.396137	0.506212	-6.60585	0.157573	0.277293
M9PHL0	M9PHL0	e(y)3	TRUE	2	0.296445	-0.229383	0.822273	24.6554	1.36826	0.218669	0.325776	-6.11282	0.101407	0.216658
M9PHM6	M9PHM6	RpL18	FALSE	0	0.0948519	-0.12409	0.313793	31.3178	1.05144	0.332238	0.4426	-6.46884	0.137772	0.090211
M9PI05	M9PI05	JIL-1	FALSE	0	-0.198215	-0.394406	-0.00202398	31.321	-2.45203	0.0482982	0.110396	-4.6392	0.0343639	0.080837
M9PI07	M9PI07	FoxK	FALSE	0	-0.514971	-0.7823	-0.247642	28.7381	-4.67526	0.00311893	0.0197962	-1.70827	0.00616212	0.110148
M9PI41	M9PI41	sti	FALSE	0	0.052368	-0.631584	0.73632	29.1259	0.185827	0.858502	0.896951	-7.03495	0.279202	0.28181
M9PI47	M9PI47	Sap130	FALSE	0	0.118234	-0.0911807	0.327649	27.0768	1.37026	0.218076	0.325525	-6.1104	0.101329	0.0862857
M9PIA6	M9PIA6	Mi-2	FALSE	0	0.362823	0.147375	0.578271	30.3914	4.08716	0.00599571	0.0274908	-2.41817	0.00855729	0.0887715
M9PID3	M9PID3	HIPP1	FALSE	0	0.0420688	-0.158566	0.242704	27.6435	0.508887	0.628403	0.719471	-6.90861	0.223956	0.0826682
M9PIM0	M9PIM0	RpL10	FALSE	0	-0.196981	-0.426738	0.032776	30.33	-2.08077	0.0810713	0.155657	-5.16614	0.0484527	0.0946673
M9PJE8	M9PJE8	e(r)	FALSE	0	-0.235079	-0.772588	0.302431	27.8994	-1.06144	0.328016	0.438878	-6.45854	0.136613	0.221471
M9PJN0	M9PJN0	mud	FALSE	0	0.538076	-0.472627	1.54878	27.088	1.29208	0.242328	0.351479	-6.20352	0.109408	0.416442
M9PJN8	M9PJN8	Gapdh2	TRUE	2	-0.424873	-1.57644	0.726692	25.578	-0.895445	0.40392	0.513169	-6.62042	0.159738	0.474482
N0D8I3	N0D8I3	Spt6	FALSE	0	-0.169365	-0.348003	0.00927238	31.2805	-2.30102	0.0595623	0.12675	-4.85436	0.0394545	0.0736044
O01666	O01666	ATPsyngamma	FALSE	0	-0.478168	-0.723072	-0.233265	25.9672	-4.73865	0.0029155	0.0193704	-1.6349	0.00602959	0.100908
O02193	O02193	mof	FALSE	0	0.255466	0.0220374	0.488895	29.0073	2.65612	0.0365027	0.0901764	-4.34851	0.02807	0.0961803
O16102	O16102	Chd3	FALSE	0	-0.00625573	-0.236564	0.224053	26.3272	-0.065923	0.94951	0.96586	-7.05229	0.300651	0.0948945
O16797	O16797	RpL3	FALSE	0	0.0120511	-0.163292	0.187394	31.1683	0.166804	0.872824	0.908305	-7.0388	0.282736	0.0722471
O16810	O16810	Orc1	FALSE	0	0.441981	0.263091	0.620872	28.1077	5.99633	0.000852772	0.00942344	-0.298912	0.00293331	0.0737087
O18332	O18332	Rab1	TRUE	6	-0.351822	-0.868181	0.164536	24.6515	-1.65364	0.14761	0.244584	-5.75098	0.0761337	0.212757
O18353	O18353	Chi	FALSE	0	-0.0480287	-0.222662	0.126605	25.4544	-0.667486	0.528473	0.634168	-6.8069	0.197403	0.0719546
O18373	O18373	Sps1	FALSE	0	-0.114876	-0.365532	0.13578	30.8314	-1.11229	0.307208	0.419815	-6.40509	0.130679	0.103278
O18404	O18404	scu	FALSE	0	-0.399505	-0.638317	-0.160692	28.1954	-4.06007	0.00618659	0.0279488	-2.45214	0.00869988	0.0983985
O18405	O18405	Surf4	TRUE	6	0.49828	-0.110101	1.10666	24.5856	1.98777	0.0923901	0.172432	-5.29634	0.0536743	0.250673
O18413	O18413	Rpt6	FALSE	0	0.174701	-0.301439	0.650842	24.557	0.890493	0.406376	0.515863	-6.62493	0.160577	0.196185
O18640	O18640	Rack1	FALSE	0	-0.470296	-0.637816	-0.302776	28.727	-6.81356	0.000423042	0.00692252	0.458198	0.00215483	0.0690235
O44081	O44081	Nop60B	FALSE	0	0.280945	0.0857111	0.47618	32.0792	3.49249	0.0122419	0.0431275	-3.18897	0.0134247	0.0804428
O44434	O44434	qkr58E-3	FALSE	0	-0.713657	-0.945356	-0.481958	28.4773	-7.4754	0.000251373	0.00559579	1.01605	0.00174185	0.0954674
O44437	O44437	SmD3	FALSE	0	0.0462021	-0.314469	0.406873	27.8089	0.310899	0.76605	0.826882	-6.99953	0.25739	0.148608
O46048	O46048	east	FALSE	0	0.312071	0.13544	0.488702	29.5273	4.288	0.00476889	0.0247466	-2.16979	0.0077031	0.0727778
O46050	O46050	Nmd3	TRUE	5	0.0109863	-0.723081	0.745054	24.5514	0.0363231	0.972164	0.979668	-7.05404	0.30495	0.302459
O46084	O46084	Pgam5	FALSE	0	-0.109295	-0.361288	0.142697	27.5256	-1.05265	0.331728	0.442304	-6.4676	0.13768	0.103829
O46106	O46106	noi	FALSE	0	0.30164	0.123321	0.479958	27.9214	4.10545	0.00587051	0.0271352	-2.39529	0.00844662	0.073473
O46307	O46307	CG11417	FALSE	0	-0.172367	-0.407042	0.0623071	28.8753	-1.78262	0.123252	0.214651	-5.57851	0.0668163	0.0966935
O61345	O61345	peng	FALSE	0	0.316216	0.0876771	0.544754	30.3454	3.35809	0.0144931	0.0486055	-3.3701	0.0151299	0.0941652
O61360	O61360	crol	FALSE	0	-0.329068	-0.605386	-0.0527497	31.0666	-2.89031	0.0266251	0.0732665	-4.0172	0.0228063	0.113852
O61380	O61380	eIF4G1	FALSE	0	-0.462495	-0.618375	-0.306614	31.7462	-7.20083	0.000310491	0.00635886	0.790225	0.00197938	0.0642279
O62530	O62530	AP-2mu	TRUE	3	0.0818217	-0.351704	0.515347	24.6893	0.45806	0.662502	0.752012	-6.9359	0.234085	0.178626
O62619	O62619	PyK	FALSE	0	-0.364768	-0.769333	0.0397972	26.6523	-2.18825	0.069727	0.14148	-5.01445	0.0440398	0.166694
O62621	O62621	beta'COP	FALSE	0	-0.327304	-0.638512	-0.0160949	27.6323	-2.55251	0.0420563	0.100308	-4.49597	0.0312238	0.128228
O76268	O76268	NTPase	FALSE	0	0.0709988	-0.111406	0.253404	25.3399	0.944677	0.380113	0.490222	-6.57452	0.152595	0.0751567
O76521	O76521	Kap-alpha1	TRUE	4	0.0738274	-0.252668	0.400323	24.7463	0.548794	0.602306	0.697961	-6.88534	0.21726	0.134527
O76742	O76742	Rab7	TRUE	4	-0.142264	-1.04452	0.75999	24.0163	-0.38268	0.714714	0.787807	-6.97139	0.245228	0.371758
O76857	O76857	BCL7-like	TRUE	7	0.309237	-0.384544	1.00302	24.7732	1.08178	0.319559	0.430564	-6.43737	0.134025	0.28586
O76863	O76863	eIF2Bbeta	TRUE	2	-0.59717	-0.999134	-0.195206	25.2873	-3.60561	0.010643	0.0394869	-3.0384	0.0122914	0.165622
O76928	O76928	cm	TRUE	5	0.398508	0.0867216	0.710295	24.3929	3.10205	0.0201401	0.0612577	-3.72139	0.0190682	0.128466
O76994	O76994	Ip259	FALSE	0	-0.00556024	-0.217979	0.206858	28.8571	-0.0635286	0.951341	0.966442	-7.05247	0.300833	0.0875233
O77263	O77263	CG4045	TRUE	7	-0.147329	-0.761703	0.467044	24.6615	-0.582003	0.581065	0.679753	-6.86477	0.211592	0.253142
O77410	O77410	eIF3e	FALSE	0	-0.0819863	-0.264839	0.100867	29.2103	-1.0882	0.316928	0.42809	-6.43063	0.133255	0.0753414
O77430	O77430	SkpA	TRUE	2	-0.5819	-1.2965	0.1327	25.7616	-1.97631	0.0938916	0.175021	-5.31231	0.0544804	0.294438
O77434	O77434	Sec22	TRUE	2	-0.99065	-2.00268	0.0213782	25.7731	-2.37573	0.0536829	0.118178	-4.74798	0.0367864	0.416988
O77459	O77459	ken	FALSE	0	-0.107116	-0.532778	0.318545	26.2126	-0.610745	0.56304	0.664603	-6.84609	0.206877	0.175386
O96433	O96433	CycT	TRUE	2	-1.04559	-1.35867	-0.732497	25.3941	-8.10515	0.000158507	0.00486934	1.50613	0.00151572	0.129003
O96689	O96689	vtd	FALSE	0	0.533632	0.169574	0.897691	27.6833	3.55746	0.0112936	0.0412043	-3.10228	0.012826	0.150004
O97102	O97102	smt3	FALSE	0	0.0983405	-0.0841927	0.280874	32.1775	1.30755	0.237346	0.346735	-6.18533	0.107931	0.0752096
O97183	O97183	RpII33	FALSE	0	0.34445	0.087597	0.601303	30.1618	3.2547	0.0165335	0.0538786	-3.51102	0.0167713	0.105832
O97454	O97454	l(1)10Bb	TRUE	2	-0.46713	-0.742841	-0.191419	24.861	-4.11199	0.00582644	0.0271352	-2.38712	0.00844662	0.113602
P02283	P02283	His2B:CG17949	FALSE	0	0.331927	0.128134	0.53572	34.8799	3.95295	0.0070105	0.0297462	-2.58755	0.00925935	0.0839693
P02299	P02299	His3:CG31613	FALSE	0	0.286722	0.0632306	0.510214	34.868	3.11364	0.0198381	0.060821	-3.70532	0.0189323	0.0920857
P04052	P04052	RpII215	FALSE	0	-0.719174	-0.964574	-0.473773	32.5619	-7.11258	0.000332767	0.00648715	0.715982	0.00201931	0.101113
P04359	P04359	RpL32	FALSE	0	0.19283	-0.0516658	0.437325	29.4525	1.91413	0.102468	0.187148	-5.39854	0.058255	0.10074
P05205	P05205	Su(var)205	FALSE	0	-0.848103	-1.13175	-0.564453	30.4198	-7.25663	0.000297289	0.00634217	0.836744	0.00197418	0.116873
P05552	P05552	Adf1	FALSE	0	-0.140875	-0.395795	0.114046	28.067	-1.34121	0.226823	0.335	-6.14536	0.104278	0.105036
P06603	P06603	alphaTub84B	FALSE	0	0.236664	-0.00291282	0.47624	33.9167	2.39749	0.0520863	0.116286	-4.71697	0.0361973	0.0987133
P07664	P07664	Sry-delta	FALSE	0	0.213058	0.0428162	0.3833	26.5345	3.03739	0.0219179	0.0649742	-3.81127	0.0202251	0.0701452
P08120	P08120	Col4a1	FALSE	0	-0.0582592	-0.618986	0.502467	30.6938	-0.252164	0.809054	0.862991	-7.01834	0.268631	0.231037
P08736	P08736	eEF1alpha1	FALSE	0	-0.120362	-0.282292	0.041569	34.4201	-1.80396	0.119617	0.209739	-5.54955	0.0652873	0.0667207
P09180	P09180	RpL4	FALSE	0	0.0341877	-0.168584	0.236959	32.8395	0.409196	0.696136	0.77483	-6.95959	0.241188	0.0835485
P12297	P12297	su(w[a])	TRUE	2	0.633218	-0.0196509	1.28609	25.2733	2.35394	0.0553322	0.120235	-4.77901	0.0374264	0.269003
P12982	P12982	Pp1-87B	FALSE	0	-0.175587	-0.482222	0.131048	28.8894	-1.38976	0.212379	0.319505	-6.08673	0.0994551	0.126344
P13060	P13060	eEF2	FALSE	0	-0.0212076	-0.210138	0.167723	32.04	-0.272432	0.794123	0.849424	-7.01228	0.264407	0.0778453
P13395	P13395	alpha-Spec	FALSE	0	0.295013	-0.145595	0.735621	30.413	1.62501	0.153612	0.251812	-5.78861	0.0783837	0.181545
P13468	P13468	fs(1)K10	TRUE	3	-1.46974	-1.79988	-1.13959	25.5082	-10.8045	2.95419e-05	0.00307637	3.24445	0.000957608	0.13603
P13709	P13709	fs(1)h	FALSE	0	0.219197	0.0478647	0.390529	30.1393	3.10502	0.0200622	0.0611716	-3.71727	0.0190414	0.0705943
P15348	P15348	Top2	FALSE	0	0.159267	-0.0479017	0.366435	33.5972	1.86582	0.109667	0.196644	-5.46506	0.0612109	0.0853601
P15357	P15357	RpS27A	FALSE	0	0.3859	0.0607	0.7111	30.5358	2.88	0.0269936	0.0737761	-4.0317	0.0229649	0.133993
P17336	P17336	Cat	FALSE	0	-1.72722	-2.2543	-1.20015	26.9739	-7.9533	0.000176649	0.00516903	1.39136	0.00160901	0.217171
P17704	P17704	RpS17	FALSE	0	-0.130387	-0.412827	0.152054	28.7575	-1.1204	0.303992	0.416532	-6.39642	0.129657	0.116375
P17886	P17886	crn	FALSE	0	0.61971	0.398134	0.841286	26.408	6.78789	0.000432019	0.00692252	0.435607	0.00215483	0.0912964
P18289	P18289	Jra	FALSE	0	-0.0524003	-0.302455	0.197655	26.428	-0.508589	0.6286	0.719471	-6.90878	0.223956	0.103031
P19018	P19018	tra2	FALSE	0	0.0606159	-0.201959	0.323191	26.9826	0.560275	0.594913	0.692787	-6.87836	0.21565	0.10819
P20028	P20028	RpI135	FALSE	0	0.26088	0.0770312	0.444728	28.6028	3.44389	0.0130084	0.0452055	-3.2542	0.0140715	0.0757516
P20193	P20193	Su(var)3-7	FALSE	0	-0.0282381	-0.319241	0.262765	27.2777	-0.235509	0.821389	0.872513	-7.02298	0.271595	0.119903
P20227	P20227	Tbp	FALSE	0	-0.290006	-0.702463	0.122451	29.2018	-1.70647	0.137118	0.229927	-5.68089	0.0715714	0.169946
P20240	P20240	Ote	FALSE	0	-0.423586	-0.633795	-0.213377	32.3411	-4.89057	0.00248595	0.0177598	-1.46149	0.00552823	0.0866128
P21187	P21187	pAbp	FALSE	0	-0.0479545	-0.207115	0.111206	30.9683	-0.731244	0.491291	0.596069	-6.7593	0.185543	0.0655793
P22700	P22700	SERCA	FALSE	0	-0.0508369	-0.317623	0.215949	26.6497	-0.462471	0.659506	0.750197	-6.93363	0.23352	0.109925
P22813	P22813	Hsf	FALSE	0	-0.436088	-0.777606	-0.0945711	27.5076	-3.09906	0.0202186	0.061375	-3.72553	0.0191047	0.140716
P23128	P23128	me31B	FALSE	0	-0.164442	-0.391125	0.0622405	28.0611	-1.76061	0.127112	0.218394	-5.60824	0.0679815	0.0934007
P23257	P23257	gammaTub23C	TRUE	2	-0.00643934	-0.727729	0.71485	25.0288	-0.0216671	0.983393	0.987895	-7.05453	0.307511	0.297194
P23572	P23572	Cdk1	TRUE	5	-0.425179	-0.919517	0.0691599	24.8129	-2.08745	0.0803147	0.154979	-5.15675	0.0482417	0.203684
P24785	P24785	mle	FALSE	0	-0.0450177	-0.284276	0.194241	29.6197	-0.456652	0.66346	0.752012	-6.93661	0.234085	0.0985822
P25007	P25007	Cyp1	FALSE	0	-0.607231	-1.03669	-0.177774	26.3045	-3.43165	0.0132095	0.0456978	-3.27067	0.0142248	0.17695
P25167	P25167	RpIII128	TRUE	3	0.899459	0.377843	1.42108	24.9891	4.18503	0.0053587	0.0262641	-2.29635	0.00817544	0.214923
P25171	P25171	Rcc1	FALSE	0	-0.170544	-0.328478	-0.0126107	30.5544	-2.62078	0.0383042	0.0932412	-4.39876	0.029024	0.0650738
P25439	P25439	brm	FALSE	0	-0.104412	-0.283511	0.0746878	30.9274	-1.41489	0.205233	0.311499	-6.05594	0.096963	0.0737947
P25991	P25991	su(f)	FALSE	0	0.64234	0.0202766	1.2644	26.2171	2.5061	0.0448267	0.1048	-4.56211	0.0326221	0.25631
P25992	P25992	yem	FALSE	0	0.0189529	-0.275714	0.31362	25.6751	0.156103	0.880903	0.914853	-7.04078	0.284774	0.121412
P26017	P26017	Pc	TRUE	1	0.418847	-0.213389	1.05108	25.1361	1.60785	0.157322	0.255928	-5.81105	0.0796648	0.260502
P26019	P26019	DNApol-alpha180	FALSE	0	-0.0977597	-0.385163	0.189644	27.1513	-0.825537	0.439622	0.545629	-6.6823	0.169843	0.11842
P26802	P26802	Dbp73D	FALSE	0	-0.177867	-0.408646	0.0529126	28.8962	-1.87054	0.108942	0.195943	-5.45859	0.0609929	0.0950886
P27864	P27864	Rrp1	FALSE	0	0.152722	-0.215228	0.520672	30.0267	1.00735	0.351391	0.459351	-6.51347	0.142986	0.151607
P28166	P28166	zfh1	FALSE	0	0.218101	-0.0232606	0.459463	26.4301	2.1931	0.0692552	0.141082	-5.00759	0.0439159	0.0994489
P28668	P28668	GluProRS	FALSE	0	0.0507827	-0.173946	0.275511	31.3522	0.548437	0.602537	0.697961	-6.88556	0.21726	0.0925954
P29327	P29327	RpS6	FALSE	0	0.116361	-0.0947261	0.327449	29.9612	1.33787	0.227847	0.33619	-6.14934	0.104649	0.0869748
P32234	P32234	128up	FALSE	0	-0.290827	-0.508651	-0.0730038	27.494	-3.2404	0.0168393	0.0542247	-3.5306	0.016879	0.0897503
P34739	P34739	lds	FALSE	0	-0.21433	-0.478167	0.0495072	28.4211	-1.97159	0.0945168	0.175973	-5.31888	0.0547766	0.108709
P35381	P35381	blw	FALSE	0	-0.173129	-0.515665	0.169408	25.9135	-1.22668	0.26441	0.375203	-6.27899	0.116793	0.141136
P35600	P35600	Gnf1	FALSE	0	0.207476	0.0299703	0.384981	29.7357	2.83677	0.0285996	0.0765313	-4.09262	0.0238226	0.0731379
P35875	P35875	Parp	FALSE	0	0.230029	-0.128819	0.588878	26.6873	1.55576	0.169107	0.270571	-5.87854	0.0842229	0.147857
P36241	P36241	RpL19	FALSE	0	0.221843	0.0241217	0.419563	30.3012	2.72308	0.033331	0.0853274	-4.25344	0.0265606	0.0814674
P38979	P38979	sta	FALSE	0	-0.118367	-0.402432	0.165697	28.1641	-1.01131	0.349638	0.458229	-6.50952	0.142637	0.117044
P39413	P39413	Aef1	TRUE	4	0.760635	-0.129549	1.65082	25.0647	2.07379	0.0818698	0.156756	-5.17595	0.0487947	0.366785
P40796	P40796	La	FALSE	0	0.159556	-0.277013	0.596125	26.2811	0.887011	0.40811	0.517635	-6.62809	0.161129	0.17988
P40797	P40797	pnut	FALSE	0	-0.1325	-0.383267	0.118267	26.6521	-1.28237	0.245501	0.355089	-6.21487	0.110531	0.103324
P41073	P41073	Pep	FALSE	0	-0.403856	-0.609245	-0.198466	33.1937	-4.77218	0.00281393	0.0189238	-1.59632	0.00589056	0.0846271
P41093	P41093	RpL18A	FALSE	0	0.0232457	-0.142173	0.188664	31.1199	0.341058	0.744305	0.810581	-6.98839	0.252316	0.0681577
P41094	P41094	RpS18	FALSE	0	-0.113186	-0.389446	0.163075	28.0747	-0.994354	0.357203	0.464576	-6.52637	0.144612	0.113828
P41375	P41375	eIF2beta	FALSE	0	-0.332236	-0.549051	-0.11542	25.6354	-3.71898	0.00926833	0.0359499	-2.88932	0.0111904	0.0893352
P41900	P41900	TfIIFbeta	TRUE	6	0.0794986	-0.107481	0.266479	24.4445	1.03189	0.340627	0.450344	-6.4888	0.140182	0.0770418
P42207	P42207	Sep1	FALSE	0	-0.599451	-1.08436	-0.114546	26.9851	-3.00031	0.0230134	0.0664883	-3.863	0.0206964	0.199796
P45437	P45437	betaCOP	FALSE	0	-0.016781	-0.324271	0.290708	26.5902	-0.132452	0.898815	0.928375	-7.0447	0.288983	0.126696
P45594	P45594	tsr	FALSE	0	-0.217889	-0.596543	0.160765	25.929	-1.39657	0.210421	0.317492	-6.07841	0.0988284	0.156018
P45889	P45889	Arp1	FALSE	0	0.311193	-0.0372854	0.659672	27.1263	2.16732	0.0718017	0.143791	-5.04408	0.044759	0.143584
P45890	P45890	Arp6	FALSE	0	0.299538	0.117256	0.48182	25.6606	3.98819	0.00672669	0.0292336	-2.54281	0.0090998	0.0751061
P45975	P45975	Su(var)3-9	TRUE	7	0.678255	0.316812	1.0397	24.2625	4.55431	0.00355297	0.0211591	-1.84996	0.00658638	0.148926
P46863	P46863	Klp61F	FALSE	0	0.268124	0.0642579	0.47199	30.7181	3.19198	0.0179225	0.0567606	-3.59714	0.0176684	0.0839993
P48159	P48159	RpL23	FALSE	0	-0.0971435	-0.31221	0.117923	28.9266	-1.09625	0.313652	0.424841	-6.42214	0.132244	0.0886145
P48423	P48423	RasGAP1	FALSE	0	-0.076318	-0.34085	0.188214	26.5056	-0.700191	0.509177	0.615339	-6.78294	0.191542	0.108996
P48555	P48555	Rala	TRUE	6	-0.648822	-1.02644	-0.271208	24.6472	-4.1701	0.00545081	0.0264115	-2.31484	0.00822133	0.155589
P48588	P48588	RpS25	FALSE	0	-0.340242	-0.547334	-0.133151	27.9567	-3.98744	0.0067326	0.0292336	-2.54376	0.0090998	0.0853284
P48591	P48591	RnrL	FALSE	0	-0.121405	-0.58433	0.34152	27.8544	-0.636494	0.547185	0.650003	-6.82869	0.202332	0.19074
P48610	P48610	Argk	TRUE	2	-1.12447	-1.53054	-0.718412	25.3789	-6.72087	0.000456497	0.00715773	0.376283	0.00222805	0.167311
P49028	P49028	mago	FALSE	0	0.201348	0.0243253	0.378371	26.8311	2.7605	0.0316879	0.0820422	-4.20043	0.025538	0.0729391
P49846	P49846	Taf5	FALSE	0	0.545906	0.327959	0.763853	27.6684	6.07905	0.000791819	0.00907637	-0.218574	0.00282528	0.0898013
P49847	P49847	Taf6	FALSE	0	0.273855	0.121152	0.426559	27.2539	4.35252	0.00443643	0.0242506	-2.09131	0.00754868	0.0629188
P50536	P50536	msl-3	FALSE	0	0.336028	0.145332	0.526724	27.2073	4.27664	0.00483024	0.0249807	-2.18367	0.00777594	0.0785728
P50887	P50887	RpL22	FALSE	0	-0.0450077	-0.284129	0.194114	28.6946	-0.456811	0.663352	0.752012	-6.93653	0.234085	0.0985258
P51406	P51406	bys	FALSE	0	-0.0928692	-0.2774	0.091662	29.5715	-1.22144	0.266255	0.376928	-6.28494	0.11733	0.0760328
P52172	P52172	srp	FALSE	0	-0.325383	-0.557278	-0.0934889	29.2062	-3.40544	0.013652	0.0467025	-3.30601	0.0145375	0.095548
P52295	P52295	Pen	FALSE	0	0.760225	0.492788	1.02766	30.874	6.89905	0.000394651	0.00681106	0.532894	0.00212014	0.110193
P52304	P52304	polo	FALSE	0	0.16978	-0.0491746	0.388734	27.7756	1.88192	0.107214	0.19397	-5.44295	0.0603788	0.0902162
P52656	P52656	TfIIA-S	TRUE	3	0.296089	-0.192952	0.78513	24.7348	1.46942	0.190478	0.294354	-5.98822	0.0916262	0.201501
P53034	P53034	RfC4	FALSE	0	0.243153	-0.0180011	0.504307	27.8247	2.2597	0.0630963	0.132218	-4.91309	0.0411567	0.107604
P54353	P54353	dod	FALSE	0	-0.311922	-0.647624	0.023781	25.8207	-2.25507	0.0635062	0.132896	-4.91968	0.0413676	0.13832
P54357	P54357	Mlc-c	FALSE	0	0.0848067	-0.163467	0.33308	27.8945	0.829027	0.437787	0.544046	-6.6793	0.16935	0.102297
P54359	P54359	Sep2	FALSE	0	-0.164101	-0.35527	0.0270673	27.498	-2.08336	0.0807772	0.155657	-5.1625	0.0484527	0.0787677
P54362	P54362	g	FALSE	0	-0.204712	-0.541315	0.131891	26.13	-1.47603	0.188758	0.292565	-5.97993	0.0910692	0.138691
P54397	P54397	Fkbp39	FALSE	0	-0.172483	-0.356847	0.0118815	33.9954	-2.27058	0.0621451	0.131085	-4.89763	0.040804	0.0759639
P54622	P54622	mtSSB	FALSE	0	-0.725437	-1.11025	-0.340626	29.0535	-4.57531	0.00347296	0.0210018	-1.8252	0.00653742	0.158555
P55162	P55162	Hem	FALSE	0	0.150132	-0.0927941	0.393059	28.5225	1.49992	0.182656	0.286871	-5.9498	0.0892968	0.100094
P55828	P55828	RpS20	FALSE	0	-0.162318	-0.340741	0.0161058	27.7048	-2.20792	0.0678337	0.139321	-4.98659	0.0433675	0.0735162
P55830	P55830	RpS3A	FALSE	0	0.00522243	-0.197989	0.208434	31.6841	0.0623723	0.952226	0.966464	-7.05256	0.30084	0.0837299
P55841	P55841	RpL14	FALSE	0	-0.0380552	-0.27126	0.19515	30.0895	-0.396046	0.705322	0.781092	-6.96554	0.243137	0.096088
P55935	P55935	RpS9	FALSE	0	-0.0257145	-0.217319	0.165889	30.7182	-0.325719	0.755334	0.819584	-6.99418	0.255119	0.078947
P56175	P56175	Rtc1	FALSE	0	-0.22517	-0.474038	0.0236976	27.1149	-2.19589	0.0689849	0.140718	-5.00363	0.0438025	0.102542
P56538	P56538	eIF6	FALSE	0	-0.00605652	-0.207915	0.195802	26.401	-0.0728189	0.944239	0.961772	-7.05174	0.299379	0.0831723
P80455	P80455	RpS12	TRUE	2	-0.401128	-1.29138	0.489123	25.3856	-1.09355	0.314746	0.425947	-6.42499	0.132588	0.366812
P91638	P91638	smid	FALSE	0	-0.01857	-0.33893	0.30179	27.2605	-0.140683	0.892573	0.924632	-7.04341	0.287818	0.131999
P91875	P91875	RpI1	FALSE	0	0.113498	-0.130565	0.35756	29.6657	1.12864	0.300757	0.412466	-6.38756	0.128392	0.100562
P91926	P91926	AP-2alpha	FALSE	0	0.170707	-0.00296301	0.344376	26.4601	2.38559	0.0529532	0.117368	-4.73393	0.0365342	0.0715575
P91928	P91928	Mitofilin	FALSE	0	0.134586	-0.171934	0.441107	27.1602	1.06564	0.326255	0.436903	-6.45419	0.135998	0.126296
P92177	P92177	14-3-3epsilon	FALSE	0	0.200648	-0.0236962	0.424992	26.2467	2.17064	0.0714679	0.143309	-5.03937	0.044609	0.092437
P92204	P92204	Nelf-E	TRUE	4	1.14373	0.210523	2.07694	25.0563	2.9745	0.0238106	0.0674892	-3.89908	0.021008	0.384512
Q00963	Q00963	beta-Spec	FALSE	0	0.0996558	-0.257653	0.456964	30.0487	0.676905	0.522868	0.627933	-6.8001	0.195462	0.147223
Q02427	Q02427	Rbp1	FALSE	0	-0.290255	-0.510485	-0.0700256	29.3057	-3.1987	0.0177677	0.0566207	-3.58789	0.0176248	0.0907417
Q04688	Q04688	Ets97D	TRUE	1	0.984764	0.505107	1.46442	25.3743	4.98276	0.00226027	0.0166912	-1.35795	0.00519563	0.197634
Q05344	Q05344	Ssrp	FALSE	0	0.048263	-0.133757	0.230283	29.6744	0.643521	0.542907	0.646939	-6.82383	0.201378	0.0749983
Q05856	Q05856	SmB	FALSE	0	0.494995	0.0752356	0.914754	32.5471	2.862	0.0276504	0.0750373	-4.05706	0.0233575	0.172954
Q07886	Q07886	Dbp45A	FALSE	0	0.0920315	-0.268308	0.452371	25.9343	0.619859	0.557397	0.659093	-6.84001	0.205161	0.148472
Q0E8G6	Q0E8G6	Cpsf5	FALSE	0	-0.441544	-0.661692	-0.221397	27.7913	-4.86775	0.00254566	0.0177598	-1.48732	0.00552823	0.090708
Q0E8J0	Q0E8J0	MEP-1	FALSE	0	0.328301	0.135934	0.520668	27.6535	4.142	0.00562896	0.0269627	-2.34973	0.00839292	0.0792614
Q0E8X6	Q0E8X6	eIF2Bdelta	FALSE	0	-0.338713	-0.533442	-0.143985	27.4529	-4.22155	0.00514069	0.0258042	-2.25128	0.00803231	0.0802343
Q0E931	Q0E931	Dgp-1	FALSE	0	-0.194406	-0.441814	0.0530023	26.5517	-1.90706	0.103492	0.188569	-5.40831	0.0586976	0.10194
Q0E965	Q0E965	SRPK	FALSE	0	-0.580549	-0.739373	-0.421725	27.6726	-8.87141	9.40767e-05	0.0038264	2.05476	0.00119108	0.0654405
Q0E9B6	Q0E9B6	RpS11	FALSE	0	0.0687329	-0.231113	0.368579	30.437	0.556334	0.597445	0.694336	-6.88077	0.216132	0.123546
Q0KHR5	Q0KHR5	RhoGAP15B	FALSE	0	-0.833912	-1.20392	-0.463906	27.1192	-5.46991	0.00139259	0.0130428	-0.831215	0.00405995	0.152454
Q0KI68	Q0KI68	nsl1	FALSE	0	0.088141	-0.119195	0.295477	28.1803	1.03174	0.34069	0.450344	-6.48895	0.140182	0.0854292
Q1LZ24	Q1LZ24	CG1603	FALSE	0	-0.0173647	-0.29259	0.257861	26.3675	-0.153125	0.883154	0.916571	-7.04131	0.285309	0.113402
Q23978	Q23978	Myo31DF	FALSE	0	0.162801	-0.0233598	0.348961	28.7651	2.12245	0.0764642	0.149807	-5.10745	0.0466319	0.0767041
Q24090	Q24090	Snr1	FALSE	0	0.0485428	-0.244809	0.341894	27.5669	0.401611	0.701428	0.777901	-6.96304	0.242144	0.12087
Q24113	Q24113	nonA-l	TRUE	2	-0.219265	-1.23794	0.799409	25.4149	-0.5224	0.619498	0.713305	-6.90091	0.222037	0.419727
Q24154	Q24154	RpL29	TRUE	5	0.273448	-0.179155	0.726051	24.6523	1.46631	0.191291	0.29505	-5.99211	0.0918426	0.186487
Q24168	Q24168	Orc2	FALSE	0	0.0795932	-0.111559	0.270745	26.8894	1.01057	0.349965	0.458266	-6.51026	0.142648	0.0787608
Q24169	Q24169	Orc5	FALSE	0	0.250487	0.0629912	0.437983	26.1021	3.24237	0.0167969	0.0542247	-3.52791	0.016879	0.0772544
Q24253	Q24253	AP-1-2beta	TRUE	4	0.0777605	-0.514415	0.669937	24.9534	0.318696	0.760404	0.822345	-6.99674	0.255978	0.243996
Q24317	Q24317	DNApol-alpha50	TRUE	3	-0.194893	-0.660204	0.270418	24.2904	-1.01653	0.347332	0.456765	-6.50429	0.142181	0.191723
Q24318	Q24318	Dp	FALSE	0	0.0972958	-0.116864	0.311455	27.1734	1.10262	0.31108	0.422849	-6.41539	0.131624	0.0882406
Q24319	Q24319	Ost48	FALSE	0	-0.202788	-0.407135	0.0015584	28.4952	-2.40849	0.0512982	0.115365	-4.70129	0.0359105	0.0841975
Q24368	Q24368	Iswi	FALSE	0	0.56321	0.383943	0.742476	30.9873	7.625	0.000224648	0.00546178	1.1359	0.00170013	0.0738636
Q24472	Q24472	Rbf	TRUE	4	0.777103	0.43412	1.12009	24.5061	5.49888	0.00135435	0.0130428	-0.800952	0.00405995	0.14132
Q24478	Q24478	Cp190	FALSE	0	0.0164354	-0.184784	0.217655	29.1932	0.198235	0.849192	0.889134	-7.03222	0.276768	0.0829089
Q24491	Q24491	Rsf1	FALSE	0	-0.874059	-1.20792	-0.540201	26.3095	-6.35402	0.000622129	0.00807662	0.042342	0.00251408	0.13756
Q24492	Q24492	RpA-70	FALSE	0	0.017068	-0.443313	0.477449	26.6619	0.0899778	0.931137	0.953484	-7.05013	0.296799	0.189692
Q24560	Q24560	betaTub56D	FALSE	0	-0.0465087	-0.25742	0.164403	32.6371	-0.535183	0.611138	0.706326	-6.89346	0.219864	0.0869024
Q24572	Q24572	Caf1-55	FALSE	0	0.116644	-0.0526927	0.285981	30.3993	1.67178	0.143922	0.239766	-5.727	0.0746341	0.0697722
Q24595	Q24595	Xpc	FALSE	0	0.197896	-0.0890564	0.484849	25.5213	1.67377	0.143524	0.239362	-5.72436	0.0745083	0.118234
Q27237	Q27237	CG5504	FALSE	0	-0.436413	-0.629543	-0.243282	27.3656	-5.48423	0.00137354	0.0130428	-0.816244	0.00405995	0.079576
Q27268	Q27268	Hel25E	FALSE	0	0.122983	-0.0673728	0.313338	30.0343	1.568	0.166263	0.266729	-5.86276	0.0830272	0.0784326
Q27272	Q27272	e(y)1	TRUE	3	0.949444	0.778071	1.12082	25.0111	13.4461	7.97904e-06	0.00182951	4.52511	0.000569487	0.0706112
Q27294	Q27294	caz	FALSE	0	-0.41791	-0.823054	-0.0127664	29.546	-2.50347	0.0449896	0.105021	-4.56587	0.0326909	0.166932
Q27333	Q27333	Alg3	TRUE	7	0.211247	-0.0769791	0.499473	24.6206	1.7788	0.123914	0.215065	-5.58368	0.0669451	0.118758
Q29QQ9	Q29QQ9	Rrp42	TRUE	7	0.00832059	-0.293581	0.310222	24.3413	0.0668894	0.948772	0.965748	-7.05222	0.300616	0.124393
Q29R10	Q29R10	CG7987	FALSE	0	-0.0578398	-0.318697	0.203017	24.9934	-0.538138	0.609214	0.704633	-6.89171	0.219337	0.107481
Q2PDY2	Q2PDY2	Trl	FALSE	0	0.057653	-0.139011	0.254317	29.539	0.711484	0.502623	0.608376	-6.77444	0.189374	0.081032
Q3YMU0	Q3YMU0	ERp60	FALSE	0	-0.607703	-0.83327	-0.382137	26.8624	-6.53863	0.000531486	0.00762955	0.212359	0.00237492	0.0929405
Q4AB54	Q4AB54	His1:CG33861	FALSE	0	-0.307927	-0.475302	-0.140552	32.4899	-4.46504	0.00391687	0.0223335	-1.95596	0.00695193	0.068964
Q4AB57	Q4AB57	His2A:CG33859	FALSE	0	0.314162	-0.0463072	0.674631	31.4095	2.11521	0.0772446	0.150517	-5.11765	0.0468528	0.148525
Q4V5A5	Q4V5A5	CG8388	TRUE	5	-0.16109	-0.803632	0.481453	24.181	-0.608463	0.564459	0.664947	-6.84761	0.206984	0.264748
Q4V6X9	Q4V6X9	CG17385	TRUE	6	-0.425665	-0.6451	-0.20623	24.5283	-4.70793	0.00301214	0.0193704	-1.67037	0.00602959	0.0904144
Q53YG3	Q53YG3	Myb	FALSE	0	0.29636	0.0729249	0.519795	28.5616	3.21912	0.0173064	0.0553803	-3.55981	0.0172387	0.0920625
Q53YH3	Q53YH3	Calr	FALSE	0	-0.493238	-0.805767	-0.18071	26.3101	-3.83033	0.00810669	0.0326821	-2.7447	0.0101732	0.128772
Q53ZT0	Q53ZT0	DnaJ-1	FALSE	0	0.143466	-0.069924	0.356855	28.2919	1.63171	0.152187	0.250278	-5.77983	0.0779061	0.0879234
Q59DT6	Q59DT6	Rb97D	FALSE	0	-0.60988	-0.919434	-0.300325	27.7466	-4.78162	0.00278606	0.018852	-1.5855	0.00586821	0.127547
Q59E33	Q59E33	scaf6	FALSE	0	0.29325	-0.0160818	0.602582	25.9942	2.30082	0.059579	0.12675	-4.85464	0.0394545	0.127455
Q59E36	Q59E36	CoRest	FALSE	0	0.153537	-0.0495962	0.356669	25.287	1.83443	0.11461	0.20258	-5.50804	0.0630587	0.0836973
Q59E58	Q59E58	zip	FALSE	0	0.397213	-0.094299	0.888725	30.7934	1.96136	0.095885	0.178052	-5.33309	0.0554239	0.202519
Q5BI50	Q5BI50	Cul4	FALSE	0	0.476187	0.236166	0.716207	27.9844	4.81502	0.00268995	0.0183634	-1.5473	0.00571612	0.0988962
Q5EAK6	Q5EAK6	tefu	TRUE	4	-0.210986	-4.05537	3.6334	25.766	-0.133197	0.898249	0.928375	-7.04459	0.288983	1.58401
Q5LJZ2	Q5LJZ2	Set1	FALSE	0	0.488351	0.0620797	0.914622	26.3789	2.78045	0.030847	0.0807173	-4.17219	0.0251256	0.175637
Q5U0V7	Q5U0V7	Synj	FALSE	0	-0.958739	-1.23191	-0.685567	25.7613	-8.51791	0.000119074	0.00412734	1.80779	0.00128475	0.112556
Q5U0X8	Q5U0X8	CG12325	FALSE	0	0.523497	0.208998	0.837995	28.266	4.03984	0.00633352	0.0284089	-2.47757	0.00884309	0.129583
Q6AWG9	Q6AWG9	CG5098	FALSE	0	-0.326663	-0.719921	0.0665951	26.7586	-2.016	0.0887953	0.166735	-5.25694	0.0519012	0.162035
Q6IGE3	Q6IGE3	Rpb12	TRUE	3	0.969517	-0.188982	2.12802	25.4872	2.03109	0.0869326	0.164444	-5.23584	0.0511879	0.477339
Q6NP69	Q6NP69	gfzf	FALSE	0	0.265743	0.0836006	0.447885	30.0684	3.54095	0.0115267	0.0414636	-3.12425	0.0129067	0.0750485
Q6NP72	Q6NP72	CG13220	TRUE	4	-0.893715	-1.14034	-0.647093	24.9138	-8.795	9.89232e-05	0.00389605	2.00223	0.00121276	0.101616
Q6NQY9	Q6NQY9	CG9143	FALSE	0	0.287805	0.0907433	0.484866	28.9599	3.54458	0.0114749	0.0414636	-3.11941	0.0129067	0.0811956
Q6NR46	Q6NR46	Spt-I	TRUE	1	-0.364252	-0.769408	0.0409046	24.8181	-2.18196	0.0703435	0.142168	-5.02335	0.0442538	0.166938
Q709R6	Q709R6	bocks	FALSE	0	-0.811049	-1.10551	-0.516587	28.1357	-6.68477	0.000470337	0.00715773	0.344116	0.00222805	0.121328
Q76NQ0	Q76NQ0	CG33303	FALSE	0	-0.296536	-0.500303	-0.0927695	28.287	-3.53194	0.0116561	0.04154	-3.13626	0.0129305	0.0839585
Q7JNE1	Q7JNE1	prod	FALSE	0	-0.138781	-0.359223	0.0816601	30.217	-1.52794	0.175735	0.280009	-5.91419	0.0871607	0.090829
Q7JQH9	Q7JQH9	whd	FALSE	0	0.127307	-0.181558	0.436172	25.8339	1.00035	0.354513	0.462251	-6.52043	0.143889	0.127262
Q7JQN4	Q7JQN4	Rs1	FALSE	0	0.338606	0.176057	0.501156	30.9834	5.05566	0.00209811	0.015986	-1.27695	0.0049761	0.0669757
Q7JQT9	Q7JQT9	CG1671	FALSE	0	0.040939	-0.146627	0.228505	29.292	0.529725	0.614699	0.709375	-6.89666	0.220813	0.0772834
Q7JQY8	Q7JQY8	CG30020	FALSE	0	-0.0332739	-0.212755	0.146207	27.954	-0.44994	0.668035	0.752274	-6.94001	0.234167	0.0739519
Q7JR58	Q7JR58	Echs1	FALSE	0	-0.294878	-0.54794	-0.0418152	27.8628	-2.82802	0.0289369	0.0769044	-4.10497	0.0239387	0.10427
Q7JRE4	Q7JRE4	MAN1	FALSE	0	-0.176901	-0.402752	0.048951	27.4453	-1.90097	0.104382	0.189965	-5.41671	0.059132	0.0930582
Q7JRH2	Q7JRH2	ReepA	FALSE	0	0.798821	0.27931	1.31833	25.9653	3.73184	0.00912514	0.0355742	-2.87252	0.0110735	0.214055
Q7JRH5	Q7JRH5	CG5726	FALSE	0	-0.517567	-0.825826	-0.209309	27.9514	-4.07493	0.00608102	0.0277164	-2.43348	0.00862753	0.127012
Q7JRJ1	Q7JRJ1	Eaf	TRUE	6	0.109092	-0.141011	0.359194	24.5349	1.05863	0.3292	0.439697	-6.46145	0.136868	0.10305
Q7JRJ9	Q7JRJ9	Incenp	FALSE	0	-0.417883	-0.680667	-0.155098	28.4364	-3.85943	0.00783028	0.0322069	-2.7072	0.0100253	0.108276
Q7JVL3	Q7JVL3	Prp38	FALSE	0	0.0481074	-0.210959	0.307174	27.1526	0.450681	0.667529	0.752256	-6.93963	0.234161	0.106744
Q7JVP4	Q7JVP4	Br140	FALSE	0	0.419585	0.172765	0.666405	27.2966	4.12581	0.0057346	0.0271352	-2.36989	0.00844662	0.101698
Q7JVW5	Q7JVW5	CG8950	TRUE	6	-0.302573	-0.792526	0.18738	24.2571	-1.4988	0.182938	0.286872	-5.95122	0.0892972	0.201877
Q7JVY0	Q7JVY0	coro	TRUE	2	-0.97646	-1.59559	-0.357333	25.4269	-3.82775	0.00813164	0.0326968	-2.74802	0.0101778	0.2551
Q7JW66	Q7JW66	CG12129	TRUE	5	-1.17431	-1.60741	-0.741202	24.906	-6.58048	0.000513091	0.00757797	0.250347	0.00235886	0.178453
Q7JWP6	Q7JWP6	HipHop	TRUE	3	0.487512	0.179318	0.795705	24.5495	3.83911	0.00802217	0.0326821	-2.73337	0.0101732	0.126986
Q7JX87	Q7JX87	Prx2540-2	TRUE	3	0.635923	0.238015	1.03383	24.2272	3.87874	0.00765272	0.0316835	-2.6824	0.0098624	0.163951
Q7JX95	Q7JX95	CG11123	TRUE	4	0.199865	-0.22513	0.62486	24.5076	1.14136	0.295815	0.40824	-6.3738	0.127076	0.175112
Q7JXC4	Q7JXC4	P32	TRUE	6	-0.677964	-1.14204	-0.213883	24.8854	-3.54554	0.0114614	0.0414636	-3.11814	0.0129067	0.191216
Q7JXF7	Q7JXF7	sel	TRUE	7	0.174097	-0.121195	0.46939	24.5113	1.4309	0.200797	0.306584	-6.0362	0.0954331	0.12167
Q7JXU4	Q7JXU4	Ns2	FALSE	0	-0.0108758	-0.214109	0.192357	30.6046	-0.129878	0.900768	0.929201	-7.04509	0.28924	0.0837386
Q7JZ53	Q7JZ53	CG4866	TRUE	3	-0.29736	-1.20948	0.614765	25.5713	-0.791219	0.457962	0.564098	-6.7112	0.175592	0.375825
Q7JZF5	Q7JZF5	Rpb5	FALSE	0	-0.415771	-0.610494	-0.221049	28.2129	-5.18212	0.001847	0.0151711	-1.13828	0.00472244	0.0802319
Q7JZW2	Q7JZW2	RpS15	FALSE	0	-0.277013	-0.642501	0.0884743	26.3612	-1.83949	0.113799	0.201522	-5.50113	0.0627294	0.150593
Q7K012	Q7K012	Bap55	FALSE	0	0.17349	-0.0644321	0.411411	30.8336	1.76973	0.125498	0.216834	-5.59593	0.0674956	0.0980315
Q7K0B6	Q7K0B6	GstT1	FALSE	0	-0.843919	-1.17394	-0.513901	26.6773	-6.20628	0.000707493	0.00848992	-0.0966857	0.00264273	0.135978
Q7K0D3	Q7K0D3	CG12909	FALSE	0	-0.380959	-0.600294	-0.161624	28.1369	-4.2154	0.00517669	0.0258505	-2.25886	0.00804669	0.0903731
Q7K0D8	Q7K0D8	Nup50	FALSE	0	0.103683	-0.114052	0.321418	29.3919	1.15571	0.290321	0.402532	-6.35816	0.125299	0.0897137
Q7K0E6	Q7K0E6	AspRS	FALSE	0	-0.186303	-0.384403	0.0117962	29.1395	-2.28247	0.0611226	0.129139	-4.88073	0.0401983	0.0816235
Q7K0F0	Q7K0F0	CG15084	TRUE	5	0.27688	-0.04186	0.595619	24.5455	2.10826	0.0780023	0.15166	-5.12745	0.0472086	0.131331
Q7K0F7	Q7K0F7	CG11200	FALSE	0	-0.264827	-0.457799	-0.0718544	27.9602	-3.3307	0.0150054	0.0500355	-3.4073	0.015575	0.0795108
Q7K0K1	Q7K0K1	CG2063	TRUE	1	-0.298306	-0.917728	0.321117	25.4513	-1.16881	0.285383	0.397414	-6.34377	0.123707	0.255222
Q7K0L8	Q7K0L8	FLASH	FALSE	0	-0.173947	-0.370118	0.0222235	28.3852	-2.15205	0.073355	0.145638	-5.06566	0.0453341	0.0808288
Q7K0X3	Q7K0X3	Ctr9	FALSE	0	0.383625	0.19214	0.57511	29.1191	4.86229	0.00256019	0.0177598	-1.49351	0.00552823	0.078898
Q7K0Y1	Q7K0Y1	CG5033	FALSE	0	0.104326	-0.0690977	0.277751	30.778	1.46	0.192954	0.296674	-6.00001	0.0923483	0.0714564
Q7K110	Q7K110	OstDelta	FALSE	0	0.210633	-0.0280674	0.449332	29.1584	2.14162	0.0744358	0.147147	-5.0804	0.0458038	0.0983521
Q7K159	Q7K159	mip40	FALSE	0	0.231335	0.0272262	0.435444	26.9485	2.75073	0.0321082	0.0827485	-4.21425	0.0257578	0.0840995
Q7K180	Q7K180	Map60	FALSE	0	-0.270152	-0.56336	0.0230552	28.2516	-2.23616	0.0652066	0.135348	-4.94653	0.0421309	0.120811
Q7K1Q7	Q7K1Q7	RpLP0-like	FALSE	0	0.149595	-0.0573541	0.356545	26.2459	1.75438	0.128228	0.219329	-5.61665	0.0682725	0.0852699
Q7K231	Q7K231	CG7747	TRUE	1	-0.475961	-0.859792	-0.0921305	24.7001	-3.00954	0.0227351	0.0661119	-3.8501	0.0205792	0.158151
Q7K264	Q7K264	CG8569	FALSE	0	0.379595	0.174686	0.584503	26.5327	4.49603	0.00378601	0.0218902	-1.91903	0.00681394	0.0844289
Q7K2B0	Q7K2B0	CG7137	FALSE	0	-0.329865	-0.485905	-0.173826	30.1059	-5.13065	0.00194487	0.0153986	-1.19444	0.00479325	0.0642932
Q7K2D2	Q7K2D2	DCTN2-p50	FALSE	0	-0.454645	-0.822475	-0.0868145	28.1126	-2.99981	0.0230285	0.0664883	-3.86369	0.0206964	0.151558
Q7K2L1	Q7K2L1	Orc3	TRUE	1	0.747919	-0.00360623	1.49945	25.8879	2.41535	0.0508128	0.114658	-4.6915	0.0356905	0.309653
Q7K2X8	Q7K2X8	Nup44A	FALSE	0	-0.189919	-0.384565	0.00472608	29.5115	-2.36807	0.054257	0.118602	-4.75889	0.0369184	0.0802001
Q7K332	Q7K332	CG30159	TRUE	4	-0.0675403	-0.409443	0.274362	24.4235	-0.479435	0.648048	0.739526	-6.92475	0.230198	0.140875
Q7K3D4	Q7K3D4	zda	TRUE	5	0.155339	-0.316376	0.627055	24.4134	0.799228	0.453634	0.559216	-6.70455	0.174072	0.194362
Q7K3D8	Q7K3D8	DMAP1	FALSE	0	0.406806	0.0488499	0.764763	27.0131	2.7582	0.031786	0.082056	-4.20367	0.0255423	0.14749
Q7K3E9	Q7K3E9	CG7745	FALSE	0	0.256525	-0.106059	0.619108	25.8557	1.71708	0.135099	0.227784	-5.66671	0.0709044	0.149396
Q7K3J0	Q7K3J0	CCT8	FALSE	0	-0.00326547	-0.481237	0.474706	25.7918	-0.0165811	0.987291	0.991162	-7.05464	0.308528	0.19694
Q7K3M5	Q7K3M5	Dhx15	FALSE	0	-0.089474	-0.287459	0.108511	30.3514	-1.09682	0.313423	0.424841	-6.42154	0.132244	0.0815762
Q7K3Q3	Q7K3Q3	CG10209	TRUE	4	0.656395	0.293442	1.01935	24.8902	4.38918	0.00425913	0.023703	-2.047	0.00737823	0.149549
Q7K4B2	Q7K4B2	l(2)k09848	FALSE	0	-0.16722	-0.453432	0.118993	29.517	-1.41797	0.204372	0.3105	-6.05215	0.096652	0.117929
Q7K4G8	Q7K4G8	CG12391	TRUE	5	-0.687892	-1.0866	-0.289188	24.9106	-4.18734	0.00534462	0.0262641	-2.2935	0.00817544	0.164279
Q7K4L8	Q7K4L8	CG7878	FALSE	0	-0.286092	-0.490939	-0.0812455	29.105	-3.38958	0.0139277	0.047121	-3.32745	0.0146677	0.0844036
Q7K5K3	Q7K5K3	Pdhb	FALSE	0	-0.249126	-0.592228	0.0939755	25.6416	-1.76224	0.126823	0.218386	-5.60605	0.0679787	0.141369
Q7K5M2	Q7K5M2	CG10139	FALSE	0	-0.0104828	-0.340894	0.319928	29.7981	-0.0770003	0.941044	0.960428	-7.05138	0.298961	0.13614
Q7K7A9	Q7K7A9	Fen1	FALSE	0	0.0769684	-0.281604	0.435541	25.7772	0.520959	0.620444	0.713859	-6.90174	0.222209	0.147744
Q7KAH0	Q7KAH0	jim	FALSE	0	-0.0370901	-0.246639	0.172458	28.7667	-0.429578	0.682009	0.762976	-6.95001	0.237498	0.0863408
Q7KHK9	Q7KHK9	Strica	FALSE	0	0.00772489	-0.180681	0.196131	27.1287	0.0995098	0.923868	0.947937	-7.0491	0.295073	0.0776294
Q7KJA9	Q7KJA9	sxc	FALSE	0	1.18973	0.975086	1.40437	25.5811	13.4524	7.95659e-06	0.00182951	4.52778	0.000569487	0.0884402
Q7KK96	Q7KK96	SMC2	FALSE	0	0.449659	0.241033	0.658285	28.1292	5.23099	0.00175921	0.0149289	-1.0853	0.00464706	0.0859605
Q7KKH3	Q7KKH3	Mys45A	FALSE	0	0.145495	-0.102296	0.393286	26.8961	1.42505	0.202406	0.308123	-6.04342	0.0959121	0.102098
Q7KKI0	Q7KKI0	CCT5	FALSE	0	-0.145027	-0.409455	0.119401	25.3503	-1.3311	0.22994	0.338303	-6.15743	0.105307	0.108953
Q7KLW9	Q7KLW9	Prp19	FALSE	0	0.104874	-0.0628329	0.272581	31.3318	1.5177	0.178236	0.281384	-5.92724	0.0875888	0.0691006
Q7KLX3	Q7KLX3	Tapdelta	TRUE	4	-1.49844	-2.29763	-0.699244	25.2482	-4.55046	0.00356785	0.0211591	-1.8545	0.00658638	0.329294
Q7KM04	Q7KM04	Eip63E	FALSE	0	-0.10415	-0.294561	0.0862609	24.9239	-1.32751	0.231056	0.338971	-6.1617	0.105514	0.0784555
Q7KMI3	Q7KMI3	CG8878	FALSE	0	0.169838	-0.0335948	0.373271	26.0853	2.0262	0.0875314	0.165026	-5.24267	0.051369	0.0838209
Q7KMJ6	Q7KMJ6	nito	FALSE	0	-0.377066	-0.556199	-0.197933	30.8457	-5.10871	0.00198835	0.0155067	-1.21849	0.00482691	0.0738085
Q7KMQ0	Q7KMQ0	Rpt1	TRUE	5	0.294126	-0.913744	1.502	24.9842	0.590992	0.575391	0.674775	-6.85902	0.210043	0.497681
Q7KN62	Q7KN62	TER94	FALSE	0	0.379672	0.114135	0.645209	29.0522	3.47018	0.0125873	0.0439412	-3.21887	0.0136779	0.10941
Q7KN75	Q7KN75	Dp1	FALSE	0	-0.0645709	-0.301328	0.172186	30.5072	-0.661916	0.531806	0.637172	-6.81088	0.198338	0.0975515
Q7KN97	Q7KN97	PCB	TRUE	6	-1.81653	-2.41894	-1.21412	25.1089	-7.31847	0.000283403	0.00613108	0.887922	0.00190847	0.248212
Q7KND8	Q7KND8	Mad1	FALSE	0	0.361574	0.16841	0.554738	27.5898	4.54298	0.00359698	0.0212499	-1.86335	0.00661463	0.0795897
Q7KNS5	Q7KNS5	qkr54B	TRUE	1	-0.805889	-1.30881	-0.302966	25.4374	-3.88904	0.00755976	0.0314683	-2.66918	0.0097954	0.207221
Q7KQZ4	Q7KQZ4	lola	FALSE	0	0.135913	-0.0681177	0.339943	28.8503	1.61672	0.155395	0.253867	-5.79947	0.0790235	0.0840671
Q7KRS9	Q7KRS9	CG1815	FALSE	0	0.547842	0.359569	0.736114	26.7967	7.06213	0.000346319	0.00648715	0.673171	0.00201931	0.0775745
Q7KRW8	Q7KRW8	CG1646	FALSE	0	-0.758687	-1.46089	-0.056481	25.9971	-2.62221	0.0382299	0.0932081	-4.39674	0.0290137	0.289331
Q7KSE8	Q7KSE8	osa	FALSE	0	-1.25537	-1.55231	-0.958421	30.918	-10.2604	4.01141e-05	0.00307637	2.93464	0.000957608	0.122351
Q7KSN8	Q7KSN8	CG31368	FALSE	0	0.664777	0.423391	0.906162	28.2535	6.68395	0.000470658	0.00715773	0.343381	0.00222805	0.0994587
Q7KSQ0	Q7KSQ0	sea	TRUE	1	-0.263689	-0.896254	0.368876	24.8705	-1.01171	0.34946	0.458229	-6.50912	0.142637	0.260637
Q7KSZ0	Q7KSZ0	Alh	FALSE	0	-0.0412898	-0.262873	0.180293	26.6676	-0.452247	0.666461	0.752012	-6.93885	0.234085	0.0912993
Q7KTL5	Q7KTL5	sip2	TRUE	2	-0.319408	-0.936372	0.297556	25.1179	-1.25648	0.25414	0.364822	-6.24489	0.113561	0.254209
Q7KTT0	Q7KTT0	Xe7	TRUE	2	1.51351	0.577825	2.4492	25.5057	3.92576	0.00723862	0.0304617	-2.62221	0.00948207	0.385534
Q7KTV5	Q7KTV5	Nopp140	FALSE	0	-0.314597	-0.612041	-0.0171527	28.3134	-2.56695	0.0412316	0.0988014	-4.4754	0.0307548	0.122557
Q7KU01	Q7KU01	PNUTS	FALSE	0	-0.959148	-1.89403	-0.024269	26.3229	-2.49	0.0458325	0.106343	-4.58507	0.0331021	0.3852
Q7KUK4	Q7KUK4	CG3919	TRUE	2	0.302213	-0.279374	0.8838	24.9726	1.26115	0.252561	0.362895	-6.2395	0.112961	0.239633
Q7KUT2	Q7KUT2	Lon	FALSE	0	0.562412	-0.378307	1.50313	27.2812	1.45099	0.195353	0.299509	-6.01126	0.0932307	0.387607
Q7KVB1	Q7KVB1	ABCB7	TRUE	7	0.343933	-0.672259	1.36013	24.8387	0.821424	0.441793	0.547253	-6.68582	0.170348	0.418704
Q7KVD1	Q7KVD1	trio	FALSE	0	-0.349829	-0.511267	-0.188392	26.1481	-5.25922	0.00171065	0.0145976	-1.05486	0.00454391	0.0665174
Q7KVP9	Q7KVP9	Xpd	TRUE	5	0.511011	-0.324634	1.34666	24.6846	1.48415	0.186663	0.291081	-5.96972	0.0906072	0.344313
Q7KVQ0	Q7KVQ0	CG4038	FALSE	0	-0.657948	-0.869229	-0.446667	31.0755	-7.55789	0.000236212	0.00546178	1.08241	0.00170013	0.0870544
Q7KVS9	Q7KVS9	Trf4-1	FALSE	0	-0.163087	-0.339011	0.0128361	25.6852	-2.24991	0.0639654	0.133675	-4.92701	0.04161	0.0724861
Q7KVW2	Q7KVW2	Pop1	FALSE	0	-0.152305	-0.324093	0.0194841	26.279	-2.15173	0.073388	0.145638	-5.06612	0.0453341	0.0707825
Q7KVX1	Q7KVX1	Pdha	TRUE	6	0.211123	-0.0646614	0.486907	24.5843	1.85795	0.110886	0.198278	-5.47585	0.0617196	0.113632
Q7KY08	Q7KY08	AGO1	FALSE	0	-0.018737	-0.286379	0.248904	27.0163	-0.169909	0.870482	0.907097	-7.0382	0.28236	0.110277
Q7PL83	Q7PL83	Spf45	TRUE	3	-0.543795	-1.20208	0.114493	25.3521	-2.00488	0.0901945	0.16895	-5.27248	0.0525904	0.271236
Q7PLI2	Q7PLI2	Nipped-B	FALSE	0	0.202127	0.0175208	0.386732	28.9278	2.65734	0.0364423	0.0901764	-4.34678	0.02807	0.0760636
Q7PLI7	Q7PLI7	CG17528	TRUE	1	-0.719203	-1.01677	-0.421638	25.6335	-5.86595	0.000960011	0.0101059	-0.427328	0.00314575	0.122606
Q7PLL6	Q7PLL6	l(3)80Fj	FALSE	0	-0.0382244	-0.449558	0.373109	28.105	-0.225536	0.828803	0.877354	-7.0256	0.273101	0.169483
Q7PLS8	Q7PLS8	IntS3	FALSE	0	0.395274	0.230618	0.559929	29.145	5.82627	0.000995632	0.010333	-0.466847	0.00321646	0.0678433
Q7YU88	Q7YU88	CG14442	FALSE	0	-0.0862706	-0.308468	0.135927	26.571	-0.942306	0.381234	0.491255	-6.57677	0.152917	0.0915526
Q7YZ93	Q7YZ93	CG12236	TRUE	5	0.214736	-0.209412	0.638883	24.3701	1.22873	0.263693	0.374683	-6.27666	0.116631	0.174762
Q7YZ99	Q7YZ99	Srrm234	FALSE	0	0.787069	0.587856	0.986282	29.8298	9.58879	5.97481e-05	0.00307637	2.52622	0.000957608	0.0820822
Q7YZA2	Q7YZA2	CG7065	FALSE	0	0.0305053	-0.209907	0.270917	29.2687	0.307955	0.768185	0.827673	-7.00056	0.257637	0.0990575
Q7YZH1	Q7YZH1	rno	TRUE	1	-0.331286	-0.701623	0.0390503	24.945	-2.17108	0.0714244	0.143309	-5.03876	0.044609	0.152591
Q867Z4	Q867Z4	lola	FALSE	0	0.117218	-0.13897	0.373406	26.4783	1.11046	0.307938	0.420065	-6.40705	0.130757	0.105558
Q86B47	Q86B47	CG8611	FALSE	0	0.213724	-0.0742502	0.501699	28.8712	1.80123	0.120077	0.210066	-5.55327	0.0653891	0.118655
Q86B87	Q86B87	mod(mdg4)	FALSE	0	-0.515152	-0.740792	-0.289513	31.278	-5.54103	0.00130081	0.0126458	-0.757126	0.00393638	0.0929706
Q86BI3	Q86BI3	Zn72D	FALSE	0	-1.05874	-1.25256	-0.864927	28.9414	-13.2578	8.68668e-06	0.00182951	4.44449	0.000569487	0.079858
Q86BI8	Q86BI8	CG33051	TRUE	3	1.29704	0.993577	1.60051	25.4454	10.3732	3.7603e-05	0.00307637	3.00039	0.000957608	0.125038
Q86BP7	Q86BP7	CG15812	TRUE	7	0.213785	-0.347202	0.774772	24.3133	0.924898	0.389545	0.49945	-6.59318	0.155468	0.231145
Q86BS3	Q86BS3	Chro	FALSE	0	0.412295	0.228842	0.595748	30.0962	5.45447	0.00141349	0.0131583	-0.8474	0.00409589	0.0755886
Q86CW5	Q86CW5	Hmr	FALSE	0	0.0634057	-0.209744	0.336555	27.0241	0.563373	0.592926	0.690998	-6.87645	0.215093	0.112547
Q8I0Q7	Q8I0Q7	CG14995	FALSE	0	-1.15743	-1.41738	-0.897476	26.9273	-10.806	2.95169e-05	0.00307637	3.2453	0.000957608	0.10711
Q8I8U7	Q8I8U7	Nipped-A	FALSE	0	0.643452	0.48763	0.799274	28.4557	10.022	4.6079e-05	0.00307637	2.79313	0.000957608	0.0642037
Q8I937	Q8I937	CG32409	FALSE	0	0.116421	-0.0952258	0.328068	29.8968	1.33502	0.228726	0.337162	-6.15275	0.104951	0.0872053
Q8IH00	Q8IH00	Mat89Ba	FALSE	0	0.352589	0.140561	0.564618	30.3164	4.03593	0.00636241	0.0284089	-2.4825	0.00884309	0.0873626
Q8IH18	Q8IH18	4E-T	TRUE	5	0.423847	-0.0485827	0.896277	24.438	2.17741	0.0707935	0.142889	-5.02979	0.0444784	0.194656
Q8IHB0	Q8IHB0	gish	FALSE	0	-0.24162	-0.44865	-0.0345896	26.4096	-2.83249	0.0287643	0.0767048	-4.09867	0.0238766	0.0853031
Q8IMB7	Q8IMB7	Rad23	TRUE	6	-0.0461852	-0.443986	0.351615	24.5688	-0.281777	0.78727	0.843268	-7.00933	0.262491	0.163907
Q8IMF5	Q8IMF5	Map205	FALSE	0	-0.17577	-0.388269	0.0367295	31.1879	-2.0075	0.089863	0.168534	-5.26882	0.0524611	0.0875566
Q8IMI7	Q8IMI7	RpS7	FALSE	0	-0.0248087	-0.233426	0.183809	30.7013	-0.288616	0.782268	0.839667	-7.00711	0.26137	0.0859572
Q8IMK5	Q8IMK5	Gnpnat	FALSE	0	-0.553514	-0.907541	-0.199487	25.5337	-3.79456	0.00846126	0.0339334	-2.79096	0.0105627	0.145871
Q8IMP6	Q8IMP6	CG5815	TRUE	2	-0.656623	-1.37021	0.0569666	25.5743	-2.23324	0.0654726	0.135717	-4.95067	0.0422456	0.294022
Q8IMV6	Q8IMV6	Saf-B	FALSE	0	-0.666975	-0.931771	-0.402179	31.058	-6.11318	0.000768122	0.00900637	-0.185673	0.00280349	0.109104
Q8IMX8	Q8IMX8	LSm3	TRUE	1	-1.1794	-2.32107	-0.0377275	26.9916	-2.5072	0.0447594	0.1048	-4.56055	0.0326221	0.470405
Q8IMZ9	Q8IMZ9	wfs1	FALSE	0	0.460603	0.0866969	0.83451	25.1354	2.98974	0.0233364	0.0667499	-3.87777	0.0207778	0.154062
Q8INM3	Q8INM3	sle	FALSE	0	-0.137771	-0.298446	0.0229029	32.7869	-2.08104	0.0810402	0.155657	-5.16575	0.0484527	0.066203
Q8INR6	Q8INR6	gpp	TRUE	1	0.132861	-0.355166	0.620888	24.9503	0.660728	0.532518	0.637528	-6.81173	0.198449	0.201083
Q8IP71	Q8IP71	Ing5	TRUE	1	0.455391	0.0921522	0.818631	24.8317	3.04271	0.0217652	0.064916	-3.80385	0.0202069	0.149666
Q8IPA8	Q8IPA8	CG33695	TRUE	3	-1.04643	-2.09772	0.00487254	25.3942	-2.41575	0.0507848	0.114658	-4.69094	0.0356905	0.433169
Q8IPE8	Q8IPE8	Mtpalpha	FALSE	0	-0.0375461	-0.34174	0.266647	28.2172	-0.29956	0.774287	0.83343	-7.00346	0.259429	0.125338
Q8IPL4	Q8IPL4	l(2)05714	FALSE	0	-0.103942	-0.320548	0.112664	27.6214	-1.16463	0.28695	0.398873	-6.34837	0.124161	0.0892487
Q8IPP4	Q8IPP4	cno	TRUE	6	0.161013	-0.0452236	0.367249	24.5866	1.8948	0.105291	0.191166	-5.42521	0.0595058	0.084976
Q8IPX7	Q8IPX7	Rrp40	FALSE	0	-0.746999	-1.01147	-0.482529	25.5567	-6.85507	0.000408974	0.00692252	0.49457	0.00215483	0.10897
Q8IQ71	Q8IQ71	dikar	FALSE	0	-1.01078	-1.2015	-0.820067	26.5361	-12.863	1.042e-05	0.00182951	4.2706	0.000569487	0.0785805
Q8IQB7	Q8IQB7	CG32032	FALSE	0	-0.0612269	-0.520177	0.397723	25.195	-0.323777	0.756735	0.820285	-6.99489	0.255337	0.189102
Q8IQT4	Q8IQT4	CG14073	TRUE	7	0.214314	-0.13675	0.565377	24.3656	1.48161	0.187316	0.291506	-5.97291	0.0907397	0.144649
Q8IQV9	Q8IQV9	Nup205	FALSE	0	0.433727	0.00724858	0.860205	31.5452	2.46824	0.0472287	0.108732	-4.61609	0.033846	0.175723
Q8IQZ4	Q8IQZ4	CG32554	TRUE	5	-0.0543417	-0.264074	0.155391	24.5107	-0.628835	0.551872	0.654576	-6.83393	0.203755	0.0864165
Q8IRC0	Q8IRC0	ens	FALSE	0	0.017947	-0.320858	0.356752	25.8538	0.128561	0.901768	0.929608	-7.04528	0.289367	0.139599
Q8IRG6	Q8IRG6	dre4	FALSE	0	0.204152	0.042511	0.365792	31.1768	3.06529	0.0211308	0.063766	-3.77243	0.019849	0.0666011
Q8IRJ8	Q8IRJ8	thoc7	FALSE	0	-0.258491	-0.726102	0.209119	25.3897	-1.34162	0.226696	0.335	-6.14486	0.104278	0.192671
Q8IRW8	Q8IRW8	trr	FALSE	0	0.361159	0.175906	0.546411	27.0631	4.73155	0.00293752	0.0193704	-1.64308	0.00602959	0.0763299
Q8MKK1	Q8MKK1	AIMP3	TRUE	1	-1.37673	-1.9137	-0.839749	25.9582	-6.22243	0.000697535	0.00843633	-0.0813501	0.00262605	0.221252
Q8MLV1	Q8MLV1	LBR	FALSE	0	0.295584	0.0593025	0.531865	28.1344	3.03613	0.0219542	0.0649742	-3.81302	0.0202251	0.0973555
Q8MLW2	Q8MLW2	dom	FALSE	0	0.536933	0.365163	0.708702	28.7624	7.58651	0.000231199	0.00546178	1.10528	0.00170013	0.0707747
Q8MMD3	Q8MMD3	Eps-15	TRUE	1	-1.85757	-3.14671	-0.568438	25.894	-3.49717	0.0121708	0.0429753	-3.18271	0.0133773	0.531165
Q8MQX9	Q8MQX9	Ankle2	TRUE	6	-0.604541	-1.57034	0.361264	24.7663	-1.51917	0.177876	0.281377	-5.92537	0.0875865	0.397943
Q8MRW1	Q8MRW1	Tim23	TRUE	1	0.376685	-0.678275	1.43164	26.0693	0.866585	0.418389	0.525897	-6.64644	0.1637	0.434678
Q8MS38	Q8MS38	CG33217	FALSE	0	0.0598894	-0.153394	0.273173	28.4815	0.681494	0.520152	0.625648	-6.79676	0.194751	0.0878795
Q8MSU4	Q8MSU4	Sym	FALSE	0	0.647855	0.491107	0.804602	27.4639	10.031	4.58365e-05	0.00307637	2.79853	0.000957608	0.0645851
Q8MSV2	Q8MSV2	shep	FALSE	0	-0.366796	-0.615265	-0.118327	26.4223	-3.58278	0.0109461	0.0403196	-3.06864	0.0125506	0.102377
Q8MSW0	Q8MSW0	IleRS	FALSE	0	0.00498136	-0.190473	0.200435	31.1825	0.0618546	0.952622	0.966464	-7.05259	0.30084	0.0805334
Q8MSW9	Q8MSW9	U3-55K	FALSE	0	-0.103441	-0.266212	0.0593293	29.9286	-1.54236	0.172268	0.275343	-5.89574	0.0857082	0.0670667
Q8MT06	Q8MT06	Ns1	FALSE	0	-0.127533	-0.288624	0.0335587	30.9729	-1.9214	0.101426	0.185687	-5.38849	0.0578002	0.0663748
Q8MT36	Q8MT36	NSD	TRUE	6	0.179339	-0.295767	0.654446	24.6957	0.916122	0.393787	0.504047	-6.60137	0.156899	0.195759
Q8MT78	Q8MT78	CG5522	TRUE	7	-0.0262191	-0.639374	0.586935	24.5814	-0.103781	0.920614	0.945862	-7.0486	0.294427	0.252639
Q8MZI3	Q8MZI3	CG10077	FALSE	0	-0.38777	-0.563115	-0.212426	27.7064	-5.36723	0.00153836	0.0138995	-0.939428	0.00432663	0.0722477
Q8ST83	Q8ST83	pho	FALSE	0	0.747408	0.491241	1.00358	26.5022	7.08115	0.000341138	0.00648715	0.689339	0.00201931	0.105549
Q8STG9	Q8STG9	Sec61alpha	FALSE	0	0.222675	-0.0915027	0.536854	29.0446	1.72015	0.134521	0.227059	-5.66261	0.0706786	0.129452
Q8STI6	Q8STI6	CG1142	FALSE	0	-0.432503	-0.683793	-0.181214	27.8942	-4.17719	0.00540686	0.0262815	-2.30606	0.00818086	0.103539
Q8SWR8	Q8SWR8	Atx2	FALSE	0	-0.909314	-1.12825	-0.690378	29.2019	-10.0801	4.4536e-05	0.00307637	2.82796	0.000957608	0.0902085
Q8SWS7	Q8SWS7	vito	TRUE	1	-0.134402	-0.853784	0.584979	25.7995	-0.453436	0.66565	0.752012	-6.93825	0.234085	0.296408
Q8SWW4	Q8SWW4	CG16972	FALSE	0	0.176941	-0.0184268	0.372308	28.6413	2.19808	0.0687736	0.140661	-5.00052	0.0437847	0.0804977
Q8SWX8	Q8SWX8	CG5196	TRUE	5	0.15463	-0.944157	1.25342	24.7886	0.341547	0.743954	0.810581	-6.9882	0.252316	0.452736
Q8SX38	Q8SX38	CG13197	TRUE	1	0.161438	-0.354844	0.67772	24.9053	0.758904	0.47572	0.580853	-6.73751	0.180807	0.212725
Q8SXM8	Q8SXM8	LysRS	FALSE	0	-0.249017	-0.426887	-0.0711466	28.4192	-3.39777	0.0137846	0.0469433	-3.31638	0.0146124	0.0732884
Q8SXU0	Q8SXU0	CG11555	FALSE	0	-0.677587	-0.944211	-0.410963	26.105	-6.16786	0.000731828	0.00871386	-0.133278	0.00271244	0.109858
Q8SXY6	Q8SXY6	bai	TRUE	3	-0.50651	-0.708541	-0.304479	24.5915	-6.08469	0.00078784	0.00907637	-0.21312	0.00282528	0.0832433
Q8SXZ6	Q8SXZ6	CG11906	TRUE	7	0.151385	-0.0907058	0.393475	24.3216	1.51766	0.178246	0.281384	-5.92729	0.0875888	0.0997491
Q8SY39	Q8SY39	CG32344	FALSE	0	0.288371	0.111899	0.464842	30.0969	3.96593	0.0069045	0.0296238	-2.57106	0.00922125	0.072712
Q8SY53	Q8SY53	Ostgamma	FALSE	0	0.119902	-0.135222	0.375025	27.7711	1.14063	0.296096	0.408262	-6.37459	0.127083	0.105119
Q8SYL1	Q8SYL1	l(2)09851	TRUE	4	-0.670653	-1.53808	0.196775	24.9519	-1.87643	0.108044	0.194757	-5.45049	0.0606236	0.357408
Q8SZ28	Q8SZ28	CG44250	FALSE	0	-0.935166	-1.44372	-0.426616	26.7531	-4.46296	0.00392581	0.0223335	-1.95844	0.00695193	0.209539
Q8SZY9	Q8SZY9	CG32075	FALSE	0	-0.0131643	-0.235402	0.209073	28.7004	-0.143763	0.89024	0.9233	-7.04291	0.287404	0.0915691
Q8T007	Q8T007	CG6791	TRUE	5	0.122152	-0.229302	0.473605	24.7288	0.843529	0.430221	0.535944	-6.66675	0.166828	0.14481
Q8T051	Q8T051	CG31365	FALSE	0	0.342558	0.175859	0.509257	25.7776	4.98736	0.00224962	0.0166912	-1.35281	0.00519563	0.0686852
Q8T060	Q8T060	AIMP2	FALSE	0	-0.771595	-1.01471	-0.528482	26.5197	-7.7028	0.000212045	0.00546178	1.19737	0.00170013	0.100171
Q8T076	Q8T076	Rcd1	FALSE	0	0.25729	0.048084	0.466496	28.7963	2.98482	0.0234884	0.0668367	-3.88465	0.0208048	0.0861995
Q8T0E7	Q8T0E7	CG10984	FALSE	0	0.0744839	-0.221748	0.370715	25.8408	0.610239	0.563355	0.664603	-6.84643	0.206877	0.122057
Q8T4A9	Q8T4A9	Rrp45	FALSE	0	-0.278132	-0.625217	0.0689523	27.3518	-1.94484	0.098138	0.180527	-5.35602	0.0561942	0.14301
Q8T4F7	Q8T4F7	ena	FALSE	0	-0.841764	-1.15675	-0.526775	30.9456	-6.4858	0.000555785	0.00767958	0.164122	0.00239049	0.129786
Q8T4G5	Q8T4G5	CG6512	FALSE	0	-0.15432	-0.460516	0.151876	27.726	-1.22318	0.265639	0.376404	-6.28296	0.117166	0.126163
Q8T6B9	Q8T6B9	hfp	FALSE	0	0.353617	0.189206	0.518029	27.6837	5.21999	0.00177855	0.0149842	-1.0972	0.00466427	0.0677429
Q8T6I0	Q8T6I0	Past1	TRUE	2	-0.810823	-1.3679	-0.253743	24.6393	-3.53246	0.0116486	0.04154	-3.13557	0.0129305	0.229535
Q94513	Q94513	BEAF-32	FALSE	0	0.0725335	-0.131118	0.276185	29.4335	0.864408	0.419496	0.526857	-6.64838	0.163999	0.0839111
Q94517	Q94517	HDAC1	FALSE	0	0.194462	-0.0613393	0.450262	29.3231	1.84502	0.112919	0.200977	-5.49357	0.0625598	0.105398
Q94522	Q94522	Scsalpha1	FALSE	0	-0.69941	-0.960829	-0.437992	29.9509	-6.49328	0.000552267	0.00767958	0.170974	0.00239049	0.107713
Q94523	Q94523	SdhA	FALSE	0	0.172392	-0.226184	0.570968	26.8319	1.04972	0.33297	0.44319	-6.47061	0.137956	0.164226
Q94524	Q94524	Dlc90F	FALSE	0	-0.0739738	-0.380088	0.23214	25.8983	-0.586495	0.578225	0.676947	-6.86191	0.210719	0.126129
Q94545	Q94545	ash2	FALSE	0	0.167557	-0.117329	0.452443	26.1248	1.42745	0.201746	0.307422	-6.04046	0.0956939	0.117382
Q94546	Q94546	Atu	FALSE	0	0.0092068	-0.373944	0.392357	25.3711	0.0583187	0.955326	0.968568	-7.05284	0.301495	0.15787
Q94883	Q94883	Dref	FALSE	0	0.0665085	-0.154095	0.287112	29.6882	0.731701	0.491031	0.596069	-6.75894	0.185543	0.0908957
Q94901	Q94901	lark	FALSE	0	-0.393068	-0.589542	-0.196595	31.1021	-4.8555	0.0025784	0.0177598	-1.50122	0.00552823	0.0809533
Q95029	Q95029	Cp1	TRUE	4	-0.896656	-1.29303	-0.500279	24.9541	-5.49017	0.00136572	0.0130428	-0.810042	0.00405995	0.16332
Q95RB1	Q95RB1	CG14641	FALSE	0	-0.503811	-0.765156	-0.242466	29.0668	-4.67867	0.00310761	0.0197962	-1.70431	0.00616212	0.107683
Q95RF6	Q95RF6	Tom20	TRUE	3	-1.11343	-1.36538	-0.861486	25.2939	-10.7257	3.08523e-05	0.00307637	3.20071	0.000957608	0.103809
Q95RI7	Q95RI7	CG17454	FALSE	0	-0.343312	-0.520047	-0.166577	26.2872	-4.7145	0.00299118	0.0193704	-1.66278	0.00602959	0.0728204
Q95RJ9	Q95RJ9	ebi	FALSE	0	0.377789	0.0908452	0.664733	27.0518	3.19537	0.0178441	0.0567465	-3.59246	0.017664	0.11823
Q95RQ8	Q95RQ8	pita	FALSE	0	-0.0574831	-0.242115	0.127149	29.2056	-0.755616	0.477552	0.582621	-6.74013	0.181358	0.0760744
Q95RV3	Q95RV3	Lhr	TRUE	2	-0.183531	-0.630458	0.263396	24.7068	-0.996647	0.356172	0.464021	-6.5241	0.14444	0.184148
Q95RY2	Q95RY2	CG7945	FALSE	0	0.0349073	-0.207135	0.27695	26.5644	0.35002	0.737891	0.80669	-6.98489	0.251105	0.0997294
Q95T98	Q95T98	CG31523	TRUE	5	-0.240844	-0.929626	0.447938	24.7419	-0.848638	0.427578	0.533518	-6.66229	0.166073	0.2838
Q95TS5	Q95TS5	IntS9	FALSE	0	0.345079	0.0646739	0.625484	25.7514	2.98677	0.023428	0.0668367	-3.88192	0.0208048	0.115536
Q95WY3	Q95WY3	Nop56	FALSE	0	0.311054	0.110905	0.511203	32.1011	3.77183	0.0086955	0.0346916	-2.82045	0.0107988	0.0824678
Q960E4	Q960E4	CG8929	FALSE	0	0.021112	-0.225694	0.267918	26.5123	0.207608	0.842177	0.884136	-7.03005	0.275213	0.101692
Q960E9	Q960E9	CG32452	TRUE	2	0.911602	0.657717	1.16549	24.9566	8.71437	0.000104351	0.00390936	1.9463	0.0012169	0.104609
Q960S0	Q960S0	BtbVII	FALSE	0	-0.312551	-0.541946	-0.0831568	27.0502	-3.30679	0.0154688	0.0507615	-3.43985	0.015801	0.094518
Q960V1	Q960V1	simj	TRUE	1	0.728534	0.257423	1.19965	25.0056	3.75314	0.00889344	0.0351366	-2.84475	0.0109373	0.194113
Q960W6	Q960W6	CG8306	FALSE	0	0.0620092	-0.247134	0.371153	25.3423	0.486816	0.643095	0.734419	-6.92079	0.228609	0.127377
Q960Y8	Q960Y8	alt	FALSE	0	-0.0306886	-0.281434	0.220057	29.4093	-0.297038	0.776124	0.834238	-7.00431	0.25968	0.103315
Q961C3	Q961C3	CG8478	FALSE	0	-0.00408518	-0.200123	0.191953	27.9849	-0.0505755	0.961252	0.971705	-7.05332	0.302471	0.0807739
Q961D1	Q961D1	CycK	FALSE	0	-0.400683	-0.678095	-0.123271	29.0296	-3.50545	0.0120459	0.0426325	-3.17163	0.0132706	0.114303
Q99323	Q99323	zip	TRUE	5	0.212996	-1.1325	1.5585	24.9546	0.3842	0.713643	0.787468	-6.97074	0.245122	0.554389
Q9GNC8	Q9GNC8	ps	TRUE	6	0.246879	0.00939307	0.484365	24.5245	2.52299	0.0437973	0.103179	-4.53805	0.0321174	0.0978518
Q9GU68	Q9GU68	eEF5	TRUE	6	0.684443	-0.325203	1.69409	24.3892	1.64527	0.149341	0.246881	-5.76201	0.0768488	0.416007
Q9GYU8	Q9GYU8	mbo	FALSE	0	0.176969	-0.252111	0.60605	29.0853	1.00099	0.354229	0.462251	-6.5198	0.143889	0.176795
Q9I7F7	Q9I7F7	Ack-like	FALSE	0	-0.244687	-0.548439	0.0590648	25.8826	-1.95506	0.0967381	0.178906	-5.34184	0.0556896	0.125156
Q9I7H8	Q9I7H8	CG18766	TRUE	3	-1.22298	-1.45483	-0.991139	24.8998	-12.8025	1.07198e-05	0.00182951	4.24334	0.000569487	0.0955271
Q9I7I8	Q9I7I8	CG42668	FALSE	0	-0.186599	-0.395033	0.021835	28.3161	-2.17275	0.0712575	0.143309	-5.03639	0.044609	0.0858816
Q9I7K0	Q9I7K0	Jupiter	FALSE	0	-0.366804	-0.670224	-0.0633833	26.1661	-2.93398	0.025123	0.0702564	-3.95585	0.0218693	0.125019
Q9I7S8	Q9I7S8	Paics	FALSE	0	-0.265642	-0.428609	-0.102675	29.8131	-3.95609	0.00698472	0.0297462	-2.58357	0.00925935	0.0671477
Q9I7T7	Q9I7T7	Larp4B	FALSE	0	-0.850519	-1.14526	-0.555779	26.9642	-7.00347	0.000362879	0.00655744	0.623047	0.00204119	0.121443
Q9I7W5	Q9I7W5	Sas10	FALSE	0	-0.439479	-0.671456	-0.207503	31.1518	-4.59793	0.00338904	0.0209692	-1.7986	0.00652726	0.0955819
Q9I7Z8	Q9I7Z8	CG18273	FALSE	0	0.431012	0.242499	0.619525	29.4103	5.54904	0.0012909	0.0126295	-0.748823	0.00393129	0.0776733
Q9N693	Q9N693	sbb	TRUE	4	-0.122462	-0.699379	0.454455	24.6571	-0.515177	0.62425	0.716627	-6.90505	0.223071	0.237708
Q9NBD7	Q9NBD7	chb	FALSE	0	0.135327	-0.170614	0.441268	28.6951	1.07353	0.322965	0.434391	-6.44598	0.135217	0.126057
Q9NCC3	Q9NCC3	SH3PX1	TRUE	4	-0.766135	-1.09263	-0.439642	24.8817	-5.69509	0.00112455	0.0114672	-0.598987	0.0035695	0.134525
Q9NG60	Q9NG60	eIF2D	TRUE	5	-0.122299	-0.883851	0.639253	24.7138	-0.389755	0.709736	0.784283	-6.96832	0.244131	0.313784
Q9NKV0	Q9NKV0	Mlf	TRUE	6	-0.283782	-1.02142	0.45385	24.6074	-0.933714	0.385319	0.495272	-6.5849	0.154168	0.303928
Q9TVQ5	Q9TVQ5	spt4	TRUE	5	-0.734506	-2.1588	0.689791	25.1765	-1.25159	0.255799	0.366177	-6.25051	0.113983	0.586856
Q9TW12	Q9TW12	DIP1	TRUE	1	-0.567977	-0.835672	-0.300282	25.1151	-5.14942	0.00190851	0.0152725	-1.17391	0.004754	0.110299
Q9U1H9	Q9U1H9	sbr	FALSE	0	0.11199	-0.0976761	0.321657	27.7369	1.29634	0.240946	0.3507	-6.19852	0.109165	0.0863893
Q9U405	Q9U405	grau	FALSE	0	0.273578	-0.0330688	0.580225	26.7109	2.16527	0.0720084	0.143828	-5.04698	0.0447704	0.126348
Q9U5L1	Q9U5L1	SrpRalpha	FALSE	0	-0.461202	-0.735854	-0.186549	28.7275	-4.07546	0.00607733	0.0277164	-2.43282	0.00862753	0.113166
Q9U9Q1	Q9U9Q1	RfC38	FALSE	0	0.187981	0.00683835	0.369123	27.9556	2.51862	0.0440614	0.103642	-4.54428	0.0322616	0.0746365
Q9U9Q2	Q9U9Q2	Neos	FALSE	0	0.110361	-0.155103	0.375826	26.6444	1.00897	0.350672	0.458801	-6.51185	0.142815	0.10938
Q9U9Q4	Q9U9Q4	eIF3h	FALSE	0	-0.200943	-0.483267	0.0813813	26.3728	-1.7274	0.133162	0.225013	-5.65289	0.0700417	0.116327
Q9V3A7	Q9V3A7	glu	FALSE	0	0.404271	0.16788	0.640663	28.1423	4.15059	0.00557385	0.0268383	-2.33905	0.00835419	0.0974009
Q9V3C0	Q9V3C0	abs	FALSE	0	0.0619642	-0.146527	0.270455	30.3537	0.721309	0.496967	0.602004	-6.76696	0.187391	0.0859051
Q9V3D6	Q9V3D6	Cpsf100	FALSE	0	0.328406	0.0734348	0.583376	27.1644	3.126	0.0195217	0.0605293	-3.68821	0.0188415	0.105056
Q9V3E7	Q9V3E7	Ref1	FALSE	0	0.583677	0.282849	0.884505	32.0062	4.70893	0.00300895	0.0193704	-1.66922	0.00602959	0.123951
Q9V3F2	Q9V3F2	lace	FALSE	0	-0.078517	-0.265888	0.108854	26.7039	-1.01702	0.347118	0.456765	-6.5038	0.142181	0.0772029
Q9V3F3	Q9V3F3	mTTF	FALSE	0	-0.440925	-0.679486	-0.202363	26.445	-4.48573	0.00382894	0.0220272	-1.93129	0.00685659	0.098295
Q9V3G1	Q9V3G1	RpL8	FALSE	0	-0.235612	-0.428128	-0.0430967	29.8242	-2.9703	0.0239431	0.0674892	-3.90495	0.021008	0.0793227
Q9V3G3	Q9V3G3	cyp33	FALSE	0	-0.0127949	-0.246468	0.220879	25.9971	-0.132891	0.898482	0.928375	-7.04463	0.288983	0.096281
Q9V3H9	Q9V3H9	Nab2	FALSE	0	0.532865	0.305114	0.760616	27.9961	5.67839	0.00114228	0.0115431	-0.615977	0.00359311	0.0938409
Q9V3J4	Q9V3J4	Sec13	FALSE	0	0.0671502	-0.155168	0.289468	28.2981	0.733063	0.490257	0.596069	-6.75788	0.185543	0.0916022
Q9V3L6	Q9V3L6	Cbp20	FALSE	0	-0.44747	-0.79047	-0.104471	26.4321	-3.16621	0.0185294	0.0583219	-3.63264	0.0181544	0.141327
Q9V3P2	Q9V3P2	l(2)34Fd	FALSE	0	0.380028	0.167987	0.59207	28.6438	4.34975	0.00445017	0.0242506	-2.09466	0.00754868	0.0873679
Q9V3P3	Q9V3P3	REG	FALSE	0	-0.234236	-0.493763	0.0252915	29.2555	-2.19048	0.0695097	0.141413	-5.0113	0.0440189	0.106934
Q9V3Q4	Q9V3Q4	Jafrac2	TRUE	1	-1.43036	-2.37871	-0.482013	26.6968	-3.66055	0.00995056	0.0378318	-2.96592	0.0117762	0.390749
Q9V3T8	Q9V3T8	SC35	TRUE	1	-0.62609	-1.05155	-0.20063	25.5972	-3.57147	0.0110999	0.0406908	-3.08366	0.0126662	0.175303
Q9V3V3	Q9V3V3	Pez	TRUE	7	0.0724599	-0.167954	0.312874	24.5921	0.731486	0.491153	0.596069	-6.75911	0.185543	0.0990585
Q9V3W7	Q9V3W7	SF2	FALSE	0	0.523627	0.287566	0.759689	33.0965	5.38351	0.00151414	0.01388	-0.922176	0.00432055	0.097265
Q9V3Y5	Q9V3Y5	CG4119	FALSE	0	-0.0310596	-0.207742	0.145623	30.2415	-0.426649	0.684031	0.764681	-6.95142	0.238029	0.0727988
Q9V405	Q9V405	Rpt3	FALSE	0	0.375261	-0.0906766	0.8412	25.6545	1.95467	0.0967909	0.178906	-5.34238	0.0556896	0.191982
Q9V406	Q9V406	crp	FALSE	0	0.376519	0.177099	0.57594	29.6585	4.58232	0.0034467	0.0210018	-1.81694	0.00653742	0.0821678
Q9V414	Q9V414	Smg5	TRUE	2	-0.191001	-0.681382	0.299381	24.7678	-0.945301	0.379818	0.490222	-6.57393	0.152595	0.202053
Q9V426	Q9V426	vig	TRUE	3	-0.515199	-0.881326	-0.149071	24.9855	-3.41516	0.013486	0.0464451	-3.29289	0.0144574	0.150856
Q9V431	Q9V431	cass	FALSE	0	-0.366269	-0.611236	-0.121303	28.9457	-3.6288	0.0103445	0.038944	-3.00776	0.0121224	0.100934
Q9V455	Q9V455	Kap-alpha3	FALSE	0	0.218139	0.0476134	0.388665	28.5509	3.10465	0.0200719	0.0611716	-3.71778	0.0190414	0.0702621
Q9V460	Q9V460	Spt5	FALSE	0	-0.272693	-0.468155	-0.0772316	30.9518	-3.38596	0.0139914	0.0472326	-3.33235	0.0147025	0.0805364
Q9V463	Q9V463	Nup154	FALSE	0	0.405382	0.00817463	0.80259	30.6569	2.47694	0.0466652	0.107786	-4.60369	0.0335515	0.163662
Q9V466	Q9V466	Nup107	FALSE	0	0.401453	0.0545319	0.748375	30.47	2.80849	0.0297054	0.0781293	-4.13255	0.02432	0.142943
Q9V468	Q9V468	CG9776	FALSE	0	0.66761	0.459934	0.875285	30.5645	7.80201	0.000197134	0.00531223	1.2749	0.00165358	0.085569
Q9V474	Q9V474	dbr	FALSE	0	0.29992	0.116447	0.483394	26.5105	3.96735	0.00689296	0.0296238	-2.56925	0.00922125	0.0755971
Q9V492	Q9V492	CG11077	FALSE	0	-0.221455	-0.402409	-0.0405007	26.0689	-2.9702	0.0239464	0.0674892	-3.9051	0.021008	0.0745589
Q9V493	Q9V493	CG11076	FALSE	0	-0.725463	-0.950163	-0.500763	27.9511	-7.83575	0.000192339	0.00527557	1.30106	0.00164217	0.0925837
Q9V4C8	Q9V4C8	Hcf	FALSE	0	0.295723	0.122407	0.469039	29.9202	4.1411	0.00563479	0.0269627	-2.35085	0.00839292	0.0714118
Q9V4D4	Q9V4D4	bip2	FALSE	0	0.78881	0.4525	1.12512	27.0441	5.69247	0.00112731	0.0114672	-0.601652	0.0035695	0.138571
Q9V4F9	Q9V4F9	MED26	TRUE	1	0.19116	-0.017761	0.400081	24.4881	2.22067	0.0666342	0.137938	-4.96851	0.0429372	0.0860822
Q9V4P1	Q9V4P1	scra	FALSE	0	-0.232887	-0.537393	0.0716189	29.2837	-1.85617	0.111163	0.198543	-5.4783	0.0618022	0.125466
Q9V4Q8	Q9V4Q8	U2A	FALSE	0	0.899287	0.536215	1.26236	30.8634	6.01139	0.000841289	0.00936392	-0.284223	0.00291479	0.149597
Q9V4W1	Q9V4W1	Gle1	TRUE	2	0.35907	-0.0638969	0.782036	24.6419	2.06035	0.0834301	0.1586	-5.19482	0.0493687	0.174276
Q9V535	Q9V535	tsu	FALSE	0	0.413764	-0.0984148	0.925942	27.0848	1.96065	0.0959814	0.178052	-5.33408	0.0554239	0.211034
Q9V597	Q9V597	RpL31	FALSE	0	-0.045026	-0.241708	0.151656	27.3783	-0.555607	0.597912	0.694336	-6.88121	0.216132	0.0810393
Q9V5P6	Q9V5P6	CG7637	FALSE	0	1.17111	0.720466	1.62175	30.7026	6.30717	0.00064786	0.00815666	-0.00145895	0.00253899	0.185679
Q9V5Q4	Q9V5Q4	CG12343	TRUE	3	0.258874	-0.00961582	0.527364	24.62	2.34007	0.0564098	0.121693	-4.79877	0.0378804	0.110626
Q9V6B9	Q9V6B9	Nup54	FALSE	0	0.293301	-0.114777	0.70138	25.1969	1.74437	0.130037	0.221759	-5.63012	0.0690287	0.168142
Q9V6Q2	Q9V6Q2	cid	FALSE	0	-0.853145	-1.25764	-0.448649	26.8704	-5.11891	0.00196801	0.0155018	-1.2073	0.00482539	0.166665
Q9V726	Q9V726	Cpsf160	FALSE	0	0.772332	0.496968	1.0477	26.8903	6.80716	0.00042526	0.00692252	0.452571	0.00215483	0.113459
Q9V773	Q9V773	Cyp6a20	TRUE	7	0.393079	-0.0461254	0.832283	24.3265	2.17211	0.0713212	0.143309	-5.0373	0.044609	0.180966
Q9V7P1	Q9V7P1	wcd	FALSE	0	-0.230199	-0.495792	0.0353945	28.5297	-2.10356	0.0785185	0.152278	-5.13407	0.047401	0.109433
Q9V7Y2	Q9V7Y2	Sply	FALSE	0	-0.128877	-0.341525	0.083771	28.5737	-1.4709	0.190091	0.294334	-5.98636	0.0916198	0.0876179
Q9V8R9	Q9V8R9	cora	FALSE	0	-0.79347	-1.0381	-0.548846	30.0489	-7.87226	0.0001873	0.00523079	1.32924	0.00162823	0.100793
Q9V8V8	Q9V8V8	par-1	FALSE	0	-0.269085	-0.453364	-0.0848056	27.7393	-3.5439	0.0114846	0.0414636	-3.12032	0.0129067	0.0759289
Q9V9K7	Q9V9K7	Ars2	FALSE	0	0.00208134	-0.19794	0.202103	30.802	0.0252543	0.980644	0.98707	-7.05443	0.307254	0.0824152
Q9V9M7	Q9V9M7	RpL21	FALSE	0	0.315136	0.0554608	0.574811	31.8168	2.94535	0.0247472	0.0693645	-3.93991	0.0215917	0.106994
Q9V9N4	Q9V9N4	Clamp	FALSE	0	-0.17775	-0.447801	0.0923003	26.9664	-1.59748	0.159605	0.258056	-5.82456	0.0803273	0.11127
Q9V9S8	Q9V9S8	FeCH	TRUE	5	-0.403126	-1.12715	0.320895	24.7794	-1.35132	0.223744	0.331409	-6.13324	0.10316	0.29832
Q9V9T4	Q9V9T4	Acf	FALSE	0	0.513813	0.266371	0.761255	27.848	5.03965	0.00213257	0.015986	-1.29467	0.0049761	0.101954
Q9V9T5	Q9V9T5	Mccc1	TRUE	6	1.64854	0.941364	2.35572	24.065	5.6577	0.00116469	0.0116926	-0.637072	0.00363966	0.291381
Q9V9U9	Q9V9U9	CG11563	FALSE	0	-0.22784	-0.531464	0.0757836	27.6324	-1.82122	0.116755	0.20566	-5.52606	0.0640174	0.125103
Q9V9V0	Q9V9V0	CstF50	FALSE	0	-0.299876	-1.00764	0.407886	26.8098	-1.02831	0.342181	0.451926	-6.49243	0.140675	0.291621
Q9V9W2	Q9V9W2	RpL6	FALSE	0	0.224963	0.0236734	0.426253	31.1705	2.71243	0.0338154	0.0864234	-4.26855	0.0269017	0.0829378
Q9V9Z8	Q9V9Z8	CG15561	TRUE	6	0.694344	0.232757	1.15593	24.3397	3.65082	0.0100696	0.0381232	-2.97874	0.0118669	0.190189
Q9V9Z9	Q9V9Z9	CG1542	FALSE	0	0.238544	-0.035247	0.512335	30.3611	2.11455	0.0773164	0.150517	-5.11858	0.0468528	0.112811
Q9VA18	Q9VA18	Chchd3	FALSE	0	-1.91871	-2.27212	-1.56529	27.1487	-13.1763	9.0153e-06	0.00182951	4.40914	0.000569487	0.145618
Q9VA69	Q9VA69	PH4alphaEFB	FALSE	0	-0.140823	-0.422529	0.140883	26.8623	-1.21324	0.269159	0.380339	-6.2942	0.118391	0.116072
Q9VAA9	Q9VAA9	Jasper	FALSE	0	0.367035	0.172694	0.561376	30.1511	4.58366	0.00344172	0.0210018	-1.81537	0.00653742	0.0800746
Q9VAC1	Q9VAC1	CG7920	FALSE	0	-0.246405	-0.473126	-0.0196839	29.059	-2.63771	0.03743	0.0918419	-4.37469	0.0285884	0.0934163
Q9VAC4	Q9VAC4	Nph	FALSE	0	-0.415672	-0.732186	-0.099157	26.5863	-3.18732	0.0180306	0.0569855	-3.60355	0.0177384	0.130414
Q9VAC7	Q9VAC7	CG15525	TRUE	4	1.95078	0.526044	3.37551	25.9655	3.3231	0.0151511	0.0500474	-3.41764	0.0155787	0.587036
Q9VAC9	Q9VAC9	CG7903	FALSE	0	-0.487915	-0.671324	-0.304505	25.7344	-6.45641	0.000569853	0.00774596	0.13714	0.00241115	0.0755706
Q9VAF3	Q9VAF3	CG7824	FALSE	0	0.284814	-0.0201982	0.589827	25.8398	2.26628	0.06252	0.131369	-4.90376	0.0408923	0.125675
Q9VAH9	Q9VAH9	IntS11	FALSE	0	0.265818	0.104929	0.426707	27.0411	4.00984	0.00655867	0.0287832	-2.51541	0.00895959	0.0662914
Q9VAJ1	Q9VAJ1	Cap-D2	FALSE	0	0.728487	0.543924	0.913049	27.4416	9.57959	6.00854e-05	0.00307637	2.52041	0.000957608	0.0760457
Q9VAJ2	Q9VAJ2	Bub3	FALSE	0	-0.367886	-0.590013	-0.145759	26.3213	-4.01958	0.00648465	0.0287787	-2.50312	0.00895819	0.0915236
Q9VAL7	Q9VAL7	Cnx99A	FALSE	0	-0.305815	-0.552089	-0.0595402	26.1465	-3.01375	0.0226095	0.0658978	-3.84422	0.0205126	0.101473
Q9VAQ5	Q9VAQ5	CG11837	FALSE	0	0.0366583	-0.189116	0.262433	24.8939	0.394063	0.706711	0.781504	-6.96642	0.243265	0.0930264
Q9VAQ7	Q9VAQ7	Slu7	FALSE	0	-0.046739	-0.305029	0.211551	26.7991	-0.439177	0.675404	0.758348	-6.94535	0.236057	0.106424
Q9VAW1	Q9VAW1	Moca-cyp	FALSE	0	0.627365	0.427811	0.826918	28.4508	7.63008	0.000223798	0.00546178	1.13994	0.00170013	0.0822225
Q9VAW3	Q9VAW3	Gfat2	TRUE	4	-0.233951	-0.998265	0.530364	24.9119	-0.742884	0.484696	0.590399	-6.75021	0.183779	0.314922
Q9VAW5	Q9VAW5	larp	FALSE	0	-0.291778	-0.470815	-0.112741	29.1394	-3.95528	0.00699132	0.0297462	-2.58459	0.00925935	0.0737691
Q9VAX8	Q9VAX8	CG4849	FALSE	0	0.16058	-0.0230049	0.344166	31.6581	2.12287	0.0764192	0.149807	-5.10686	0.0466319	0.0756431
Q9VAY2	Q9VAY2	Gp93	TRUE	1	0.932568	0.609513	1.25562	24.7309	7.00603	0.000362137	0.00655744	0.625243	0.00204119	0.133109
Q9VAY6	Q9VAY6	BCAS2	FALSE	0	-0.447014	-0.652087	-0.241941	29.3755	-5.29031	0.00165893	0.0144477	-1.02147	0.00449725	0.0844968
Q9VAY8	Q9VAY8	CG33213	TRUE	2	-0.591116	-1.38096	0.198727	25.2542	-1.81635	0.117555	0.206596	-5.53269	0.0643089	0.325441
Q9VB04	Q9VB04	btz	TRUE	1	-1.00364	-1.60832	-0.398964	25.232	-4.02832	0.006419	0.0285785	-2.4921	0.00889588	0.249147
Q9VB46	Q9VB46	Hmu	FALSE	0	-0.33762	-0.52863	-0.14661	27.2949	-4.28984	0.00475902	0.0247466	-2.16754	0.0077031	0.0787022
Q9VB49	Q9VB49	mrt	FALSE	0	0.139128	-0.157407	0.435662	26.4094	1.13869	0.296844	0.408559	-6.37669	0.127176	0.122182
Q9VB52	Q9VB52	l(3)mbt	FALSE	0	0.459033	0.154999	0.763068	26.8205	3.66429	0.00990529	0.0377532	-2.961	0.0117518	0.125272
Q9VB62	Q9VB62	DNApol-alpha73	TRUE	2	-0.386124	-0.667534	-0.104713	24.8199	-3.33008	0.0150172	0.0500355	-3.40814	0.015575	0.11595
Q9VB74	Q9VB74	CG6066	FALSE	0	0.222178	-0.00900753	0.453364	26.7371	2.33243	0.0570126	0.122477	-4.80965	0.0381246	0.0952559
Q9VBB3	Q9VBB3	IntS12	TRUE	1	-0.569728	-0.862337	-0.277118	25.3212	-4.7255	0.00295643	0.0193704	-1.65006	0.00602959	0.120564
Q9VBH8	Q9VBH8	RpL34a	FALSE	0	0.0379563	-0.173885	0.249798	29.5632	0.434852	0.678376	0.759465	-6.94746	0.236405	0.0872854
Q9VBI4	Q9VBI4	Exo84	FALSE	0	-0.112146	-0.337285	0.112994	25.201	-1.20893	0.270699	0.381011	-6.29907	0.118601	0.0927647
Q9VBK9	Q9VBK9	CG5913	FALSE	0	-0.822763	-1.04353	-0.601999	28.4988	-9.04514	8.40393e-05	0.0037966	2.17249	0.0011818	0.0909619
Q9VBN5	Q9VBN5	RpL27	FALSE	0	0.166583	-0.045001	0.378167	29.7866	1.91081	0.102948	0.187801	-5.40313	0.0584585	0.0871795
Q9VBP5	Q9VBP5	jigr1	FALSE	0	-0.0701442	-0.370034	0.229745	27.2889	-0.567675	0.590175	0.688523	-6.87378	0.214322	0.123564
Q9VBU4	Q9VBU4	CG11858	TRUE	7	-0.334379	-0.809829	0.141072	24.8132	-1.70688	0.13704	0.229927	-5.68034	0.0715714	0.195901
Q9VBU6	Q9VBU6	CG11857	TRUE	1	0.859803	-0.500643	2.22025	26.3635	1.53386	0.174304	0.278017	-5.90662	0.0865408	0.560548
Q9VBU8	Q9VBU8	Nup37	FALSE	0	-0.17692	-0.421309	0.0674694	27.4185	-1.75697	0.127763	0.218905	-5.61316	0.0681404	0.100696
Q9VBU9	Q9VBU9	RpS27	FALSE	0	-0.554137	-0.865723	-0.242551	27.6908	-4.31626	0.00461996	0.0245545	-2.13533	0.0076433	0.128384
Q9VBV8	Q9VBV8	Alg9	TRUE	1	-0.194577	-0.564998	0.175845	24.9748	-1.27486	0.247978	0.357983	-6.22361	0.111433	0.152626
Q9VBX1	Q9VBX1	Clbn	FALSE	0	-0.138554	-0.34813	0.0710219	26.2261	-1.60453	0.15805	0.256351	-5.81538	0.0797967	0.0863521
Q9VBX3	Q9VBX3	vig2	FALSE	0	-0.158745	-0.409027	0.0915369	26.5065	-1.53936	0.172985	0.276201	-5.89959	0.0859755	0.103124
Q9VBX4	Q9VBX4	CG31510	FALSE	0	-0.239969	-0.488603	0.00866489	27.7982	-2.34241	0.0562264	0.121468	-4.79543	0.0378104	0.102445
Q9VBY2	Q9VBY2	CG11920	FALSE	0	-0.252686	-0.616849	0.111477	28.68	-1.68405	0.14148	0.23621	-5.71073	0.073527	0.150047
Q9VBY6	Q9VBY6	PQBP1	TRUE	3	-0.598941	-1.10154	-0.0963444	25.0824	-2.89223	0.0265571	0.073264	-4.0145	0.0228055	0.207086
Q9VBZ5	Q9VBZ5	Ythdf	FALSE	0	-0.357449	-0.684894	-0.0300032	26.1759	-2.64937	0.0368396	0.090682	-4.3581	0.0282274	0.134918
Q9VC08	Q9VC08	Mink	FALSE	0	0.177022	0.0114875	0.342556	27.5583	2.59542	0.0396552	0.0962249	-4.43487	0.0299528	0.0682055
Q9VC28	Q9VC28	CG7006	FALSE	0	-0.809904	-1.04128	-0.578525	29.2329	-8.49529	0.000120918	0.00412734	1.79164	0.00128475	0.0953357
Q9VC36	Q9VC36	polybromo	FALSE	0	0.541951	0.332915	0.750987	28.672	6.29228	0.000656285	0.00819556	-0.0154271	0.0025511	0.0861295
Q9VC45	Q9VC45	asp	FALSE	0	-0.39562	-2.2177	1.42646	25.7084	-0.526962	0.616507	0.710394	-6.89827	0.22113	0.750757
Q9VC49	Q9VC49	Rpb10	FALSE	0	-0.285708	-0.546797	-0.0246185	26.2471	-2.65584	0.0365167	0.0901764	-4.34891	0.02807	0.107577
Q9VC54	Q9VC54	CG6695	FALSE	0	0.147831	-0.191918	0.487579	25.9204	1.05603	0.330296	0.440777	-6.46412	0.137204	0.139987
Q9VC60	Q9VC60	CG13625	TRUE	2	-0.499659	-0.883414	-0.115903	25.0137	-3.16	0.0186789	0.0585528	-3.64121	0.0182262	0.15812
Q9VC93	Q9VC93	Dis3	FALSE	0	0.0912926	-0.162113	0.344698	27.0914	0.874356	0.414456	0.522404	-6.6395	0.162613	0.104411
Q9VC94	Q9VC94	CG5728	FALSE	0	0.142131	-0.0597643	0.344025	31.6011	1.70856	0.136717	0.229756	-5.67809	0.0715181	0.0831872
Q9VC96	Q9VC96	BRWD3	FALSE	0	0.669517	0.478638	0.860397	28.9195	8.51277	0.00011949	0.00412734	1.80412	0.00128475	0.0786485
Q9VCB8	Q9VCB8	jnj	TRUE	6	0.427658	0.0665085	0.788807	24.4974	2.87394	0.0272127	0.0742429	-4.04023	0.0231102	0.148805
Q9VCC6	Q9VCC6	CG6178	TRUE	4	-0.385867	-0.967275	0.195542	24.8613	-1.61074	0.156692	0.255227	-5.80728	0.0794466	0.239559
Q9VCD8	Q9VCD8	SMC1	FALSE	0	0.795183	0.59589	0.994475	28.8022	9.68376	5.63911e-05	0.00307637	2.58582	0.000957608	0.0821151
Q9VCE3	Q9VCE3	Rox8	TRUE	2	0.286187	-0.621847	1.19422	25.7865	0.764921	0.472378	0.577685	-6.73268	0.179821	0.374139
Q9VCG3	Q9VCG3	CG13601	TRUE	1	-0.240634	-0.504309	0.0230412	25.0759	-2.21491	0.0671729	0.13868	-4.97667	0.043168	0.108643
Q9VCG4	Q9VCG4	Ndc1	FALSE	0	0.266604	-0.218674	0.751882	26.3746	1.33335	0.229241	0.337598	-6.15474	0.105087	0.19995
Q9VCH2	Q9VCH2	CG33111	TRUE	3	3.16904	-2.03027	8.36835	30.1469	1.47928	0.187916	0.291849	-5.97584	0.0908462	2.14228
Q9VCH5	Q9VCH5	Nup98-96	FALSE	0	0.311978	0.106296	0.517659	31.1265	3.68126	0.00970258	0.0371882	-2.93871	0.0115759	0.0847474
Q9VCK0	Q9VCK0	eIF3d1	FALSE	0	-0.0696121	-0.315161	0.175937	29.9117	-0.688043	0.51629	0.621978	-6.79196	0.193608	0.101174
Q9VCU6	Q9VCU6	HP1c	FALSE	0	0.0012939	-0.459372	0.461959	27.2024	0.00681685	0.994775	0.995423	-7.05477	0.309854	0.189809
Q9VCW3	Q9VCW3	Nup133	FALSE	0	0.386862	0.0370541	0.73667	30.6499	2.68408	0.0351412	0.0886654	-4.30879	0.0275996	0.144132
Q9VCX1	Q9VCX1	loco	TRUE	3	-0.573405	-1.18673	0.0399207	24.938	-2.26902	0.0622806	0.131085	-4.89985	0.040804	0.25271
Q9VCX7	Q9VCX7	CG31156	FALSE	0	-0.323528	-0.687824	0.0407687	25.5089	-2.15539	0.0730125	0.145268	-5.06094	0.0452189	0.150102
Q9VCY1	Q9VCY1	CG6937	FALSE	0	-0.168786	-0.335325	-0.00224806	30.4376	-2.45976	0.0477856	0.10955	-4.62819	0.0341006	0.0686192
Q9VD07	Q9VD07	CG12499	FALSE	0	0.380385	0.190355	0.570415	30.1696	4.85814	0.00257128	0.0177598	-1.49821	0.00552823	0.0782985
Q9VD26	Q9VD26	CG5382	TRUE	3	1.04071	0.407176	1.67425	24.9366	3.98683	0.00673744	0.0292336	-2.54454	0.0090998	0.261038
Q9VD52	Q9VD52	CG6015	FALSE	0	0.226951	-0.0412726	0.495174	29.7826	2.05354	0.0842321	0.159926	-5.20437	0.0497817	0.110517
Q9VD58	Q9VD58	Idh3b	TRUE	6	0.262086	-0.0982466	0.622418	24.3816	1.76526	0.126287	0.217901	-5.60197	0.0678279	0.148468
Q9VD81	Q9VD81	RpI12	TRUE	5	-1.12173	-1.46592	-0.777551	25.1543	-7.90986	0.000182269	0.00518454	1.35814	0.00161383	0.141815
Q9VDE5	Q9VDE5	ppan	FALSE	0	-0.243433	-0.412984	-0.0738812	30.6493	-3.48455	0.0123637	0.0434471	-3.19961	0.0135241	0.0698606
Q9VDI1	Q9VDI1	Synd	TRUE	1	-0.205565	-0.785434	0.374303	25.307	-0.860378	0.421551	0.527712	-6.65195	0.164265	0.238925
Q9VDK7	Q9VDK7	Srp72	FALSE	0	-0.0507084	-0.354799	0.253383	26.4758	-0.404711	0.699263	0.777184	-6.96164	0.241921	0.125295
Q9VDL2	Q9VDL2	TFAM	FALSE	0	0.00189116	-0.338667	0.342449	27.2469	0.0134774	0.98967	0.992612	-7.05469	0.308979	0.140321
Q9VDN4	Q9VDN4	CG4360	FALSE	0	0.00454403	-0.215398	0.224486	28.1641	0.0501421	0.961583	0.971705	-7.05335	0.302471	0.0906231
Q9VDQ3	Q9VDQ3	CG4936	FALSE	0	-0.0870342	-0.388554	0.214485	26.1519	-0.700557	0.508964	0.615339	-6.78267	0.191542	0.124236
Q9VDR1	Q9VDR1	MED25	FALSE	0	-0.0441049	-0.556282	0.468073	25.8789	-0.208995	0.84114	0.884136	-7.02971	0.275213	0.211034
Q9VDS6	Q9VDS6	Surf6	FALSE	0	-0.304536	-0.526766	-0.0823062	30.0122	-3.32587	0.0150978	0.0500474	-3.41387	0.0155787	0.0915659
Q9VDT1	Q9VDT1	Arc42	FALSE	0	-0.15675	-0.445992	0.132491	25.4772	-1.31528	0.234894	0.343616	-6.17621	0.10696	0.119177
Q9VDV3	Q9VDV3	Nup58	FALSE	0	-0.0621985	-0.310326	0.185929	25.9918	-0.608378	0.564512	0.664947	-6.84766	0.206984	0.102237
Q9VDY1	Q9VDY1	Ino80	FALSE	0	0.241111	0.0217925	0.46043	26.9657	2.66815	0.0359101	0.0892522	-4.33142	0.0277823	0.0903663
Q9VDZ4	Q9VDZ4	Nsun5	TRUE	5	-0.198863	-0.664622	0.266897	24.7913	-1.03624	0.338746	0.448934	-6.48438	0.139743	0.191908
Q9VE17	Q9VE17	snRNP-U1-C	FALSE	0	-0.130434	-0.501788	0.24092	26.7086	-0.852456	0.425611	0.531495	-6.65894	0.165443	0.15301
Q9VE18	Q9VE18	Smu1	FALSE	0	0.319024	0.116984	0.521064	25.2197	3.83226	0.00808796	0.0326821	-2.7422	0.0101732	0.0832469
Q9VE51	Q9VE51	Cpsf73	FALSE	0	0.762707	0.29128	1.23413	25.735	3.92656	0.00723175	0.0304617	-2.62118	0.00948207	0.194243
Q9VE52	Q9VE52	CstF64	FALSE	0	-0.46427	-0.764873	-0.163668	27.7647	-3.74842	0.00894427	0.0351366	-2.85091	0.0109373	0.123858
Q9VE85	Q9VE85	Nup43	FALSE	0	-0.0132628	-0.205865	0.179339	28.7663	-0.167126	0.872581	0.908305	-7.03874	0.282736	0.0793582
Q9VE94	Q9VE94	CG18600	FALSE	0	-0.311825	-0.648831	0.025181	27.6362	-2.24565	0.0643472	0.133926	-4.93306	0.0416883	0.138857
Q9VE98	Q9VE98	CG8064	FALSE	0	0.329643	0.130311	0.528975	29.4519	4.01361	0.00652993	0.0287787	-2.51066	0.00895819	0.0821313
Q9VEA5	Q9VEA5	Rpb4	FALSE	0	-0.179909	-0.521705	0.161886	27.3089	-1.27749	0.24711	0.357066	-6.22056	0.111147	0.140831
Q9VEB3	Q9VEB3	Non3	FALSE	0	0.251532	-0.00485975	0.507924	30.0636	2.38099	0.0532919	0.117949	-4.74047	0.0367149	0.105642
Q9VEB9	Q9VEB9	Ssdp	FALSE	0	-0.490952	-0.694103	-0.287802	26.3284	-5.86529	0.000960588	0.0101059	-0.42798	0.00314575	0.0837046
Q9VEC1	Q9VEC1	MED17	FALSE	0	0.189225	-0.11303	0.491481	27.0337	1.5194	0.177817	0.281377	-5.92507	0.0875865	0.124539
Q9VEF0	Q9VEF0	Odj	FALSE	0	0.188917	-0.233419	0.611252	27.2495	1.08563	0.317978	0.42881	-6.43333	0.133479	0.174016
Q9VEF5	Q9VEF5	CG7379	FALSE	0	-0.0437767	-0.278126	0.190573	26.5859	-0.453365	0.665698	0.752012	-6.93828	0.234085	0.0965595
Q9VEG9	Q9VEG9	CG7655	FALSE	0	-0.199236	-0.549824	0.151351	26.6657	-1.37924	0.215436	0.323437	-6.09952	0.100679	0.144453
Q9VEJ1	Q9VEJ1	SF1	FALSE	0	0.0232998	-0.152686	0.199285	27.6146	0.321324	0.758506	0.821046	-6.99579	0.255574	0.0725118
Q9VEL2	Q9VEL2	Brf	FALSE	0	0.376974	-0.110799	0.864746	28.4066	1.87569	0.108156	0.194757	-5.4515	0.0606236	0.200978
Q9VEN1	Q9VEN1	cher	TRUE	1	-0.113639	-1.41056	1.18328	25.1386	-0.212658	0.838403	0.883862	-7.02883	0.275127	0.534374
Q9VEN9	Q9VEN9	Patr-1	TRUE	2	-0.490597	-0.986919	0.00572448	24.9938	-2.399	0.051977	0.116211	-4.71481	0.0361739	0.204501
Q9VEP0	Q9VEP0	CG3995	FALSE	0	-0.224688	-0.424486	-0.0248909	28.509	-2.72935	0.0330496	0.0847481	-4.24455	0.0263803	0.082323
Q9VEP9	Q9VEP9	Sf3a1	FALSE	0	0.344352	0.0572	0.631504	26.6661	2.91045	0.0259209	0.0719974	-3.98889	0.0224112	0.118316
Q9VEQ2	Q9VEQ2	EMC2B	FALSE	0	-0.414158	-0.604699	-0.223617	25.8289	-5.2753	0.00168368	0.0144477	-1.03758	0.00449725	0.078509
Q9VES0	Q9VES0	CG10324	TRUE	4	0.48121	0.0991192	0.863301	24.8593	3.05659	0.0213729	0.0639937	-3.78453	0.0199199	0.157434
Q9VEX5	Q9VEX5	asun	FALSE	0	0.0841522	-0.148262	0.316566	27.3539	0.878763	0.412237	0.521579	-6.63554	0.162356	0.0957621
Q9VEX6	Q9VEX6	bor	FALSE	0	0.0866223	-0.0824283	0.255673	30.7076	1.2436	0.258534	0.36906	-6.25968	0.114881	0.0696543
Q9VEY5	Q9VEY5	CG5903	FALSE	0	-1.33244	-1.90887	-0.756016	26.7234	-5.61012	0.00121815	0.0120715	-0.685806	0.00375759	0.237507
Q9VEZ3	Q9VEZ3	msps	FALSE	0	0.152585	-0.0309537	0.336124	29.5124	2.01768	0.0885857	0.166735	-5.25459	0.0519012	0.075624
Q9VEZ8	Q9VEZ8	pnr	FALSE	0	0.250523	0.0291579	0.471889	26.6041	2.74667	0.0322846	0.083064	-4.22	0.025856	0.0912097
Q9VF56	Q9VF56	obe	TRUE	4	0.327861	0.0145589	0.641163	24.9353	2.53977	0.0427983	0.101584	-4.51412	0.031621	0.129091
Q9VF87	Q9VF87	Sra-1	FALSE	0	0.440835	0.0351477	0.846523	27.84	2.63726	0.0374526	0.0918419	-4.37532	0.0285884	0.167156
Q9VF92	Q9VF92	ear	TRUE	3	0.164824	-0.234957	0.564605	24.1498	1.00061	0.354395	0.462251	-6.52017	0.143889	0.164723
Q9VFB5	Q9VFB5	Rpb7	FALSE	0	-0.0905038	-0.371924	0.190917	26.8132	-0.780513	0.463794	0.568092	-6.72002	0.176835	0.115954
Q9VFC0	Q9VFC0	Mau2	FALSE	0	0.336851	0.0326471	0.641054	28.618	2.68746	0.0349802	0.0885167	-4.30399	0.0275533	0.125342
Q9VFE6	Q9VFE6	CG3817	FALSE	0	0.0812975	-0.370494	0.533089	28.8006	0.436725	0.677088	0.758947	-6.94655	0.236244	0.186153
Q9VFE7	Q9VFE7	Nup93-2	FALSE	0	0.512893	0.161486	0.8643	28.7644	3.5423	0.0115075	0.0414636	-3.12246	0.0129067	0.144791
Q9VFF3	Q9VFF3	Rrp6	FALSE	0	0.0428518	-0.276118	0.361822	27.528	0.326053	0.755093	0.819584	-6.99405	0.255119	0.131426
Q9VFP0	Q9VFP0	CG3061	FALSE	0	-0.348891	-0.745734	0.0479512	25.4125	-2.13374	0.0752631	0.14821	-5.09152	0.0461347	0.163512
Q9VFS6	Q9VFS6	omd	FALSE	0	0.686023	0.423096	0.948949	26.2611	6.33247	0.000633817	0.00807662	0.0222281	0.00251408	0.108334
Q9VFT4	Q9VFT4	rin	FALSE	0	-0.358147	-0.708098	-0.00819543	29.7056	-2.48383	0.0462239	0.107089	-4.59386	0.0333344	0.144191
Q9VFV8	Q9VFV8	CG9799	FALSE	0	0.384713	0.16856	0.600866	29.1164	4.31961	0.00460266	0.0245545	-2.13126	0.0076433	0.089062
Q9VFV9	Q9VFV9	Droj2	FALSE	0	-0.125918	-0.306273	0.0544378	30.2984	-1.69444	0.139442	0.233314	-5.69692	0.0726256	0.0743123
Q9VG73	Q9VG73	CG5641	FALSE	0	-0.162707	-0.367407	0.0419937	25.1864	-1.9291	0.100334	0.184126	-5.37783	0.0573144	0.0843431
Q9VG78	Q9VG78	pps	FALSE	0	0.389846	0.038393	0.741299	28.3267	2.69212	0.0347595	0.088249	-4.29737	0.02747	0.14481
Q9VG81	Q9VG81	Sccpdh2	FALSE	0	-0.451782	-0.638463	-0.2651	25.4263	-5.87348	0.000953413	0.0101059	-0.419849	0.00314575	0.0769189
Q9VG84	Q9VG84	DNAlig3	FALSE	0	0.326727	0.113562	0.539893	27.3592	3.71995	0.00925746	0.0359499	-2.88805	0.0111904	0.0878311
Q9VGA4	Q9VGA4	MBD-R2	FALSE	0	0.298569	0.13155	0.465587	29.4945	4.33858	0.00450599	0.0242849	-2.1082	0.00755937	0.0688171
Q9VGF7	Q9VGF7	GC1	TRUE	4	0.365042	0.128998	0.601086	24.5249	3.75335	0.00889125	0.0351366	-2.84449	0.0109373	0.0972577
Q9VGH0	Q9VGH0	CG6962	FALSE	0	0.368501	-0.038344	0.775346	27.5689	2.19826	0.0687569	0.140661	-5.00028	0.0437847	0.167633
Q9VGH5	Q9VGH5	glo	FALSE	0	0.261094	0.00752815	0.51466	30.0927	2.49905	0.0452644	0.105343	-4.57217	0.0327909	0.104477
Q9VGI8	Q9VGI8	Blm	FALSE	0	0.361687	0.0964451	0.626929	26.3626	3.30948	0.0154159	0.0507042	-3.43619	0.0157831	0.109288
Q9VGL0	Q9VGL0	CG14712	FALSE	0	0.37594	0.182485	0.569395	28.2662	4.71635	0.00298529	0.0193704	-1.66063	0.00602959	0.0797099
Q9VGL2	Q9VGL2	CG14711	TRUE	2	-0.100863	-0.710085	0.508358	25.2393	-0.401815	0.701285	0.777901	-6.96295	0.242144	0.251019
Q9VGN9	Q9VGN9	RpL24-like	FALSE	0	0.161307	-0.118334	0.440948	29.5286	1.39998	0.209447	0.316644	-6.07424	0.0985644	0.115221
Q9VGQ1	Q9VGQ1	CG5214	FALSE	0	-0.224646	-0.396998	-0.0522935	25.7385	-3.16337	0.0185977	0.0584173	-3.63656	0.018184	0.0710148
Q9VGT3	Q9VGT3	Ugt302C1	TRUE	5	0.306102	-0.017131	0.629335	24.4691	2.29837	0.0597829	0.126832	-4.85813	0.0394802	0.133182
Q9VGU4	Q9VGU4	Leash	TRUE	7	0.502635	0.126313	0.878956	24.3909	3.24162	0.016813	0.0542247	-3.52893	0.016879	0.155056
Q9VGZ2	Q9VGZ2	Rrp46	TRUE	5	-0.603228	-0.82376	-0.382696	24.7499	-6.63864	0.000488726	0.00735964	0.302793	0.0022909	0.0908662
Q9VH07	Q9VH07	pont	FALSE	0	0.469468	0.255203	0.683733	29.1762	5.31769	0.00161482	0.0144477	-0.99217	0.00449725	0.0882841
Q9VH20	Q9VH20	TAF1B	FALSE	0	0.0664987	-0.180366	0.313363	26.8197	0.653768	0.536705	0.640543	-6.81666	0.199387	0.101716
Q9VH45	Q9VH45	CG5359	TRUE	7	-0.1065	-0.478159	0.26516	24.5322	-0.695459	0.511941	0.617993	-6.78647	0.192368	0.153136
Q9VH64	Q9VH64	CG8507	FALSE	0	-0.230576	-0.464694	0.00354261	29.3933	-2.39027	0.0526103	0.117285	-4.72725	0.0365083	0.0964643
Q9VH84	Q9VH84	Pnn	FALSE	0	0.681435	0.462282	0.900588	28.803	7.5465	0.000238242	0.00546178	1.07329	0.00170013	0.0902982
Q9VH89	Q9VH89	dmt	TRUE	2	0.104857	-0.508555	0.718268	25.0381	0.414871	0.692189	0.770995	-6.95697	0.239994	0.252745
Q9VHA8	Q9VHA8	P58IPK	TRUE	5	0.390526	0.20244	0.578613	24.3619	5.0392	0.00213355	0.015986	-1.29517	0.0049761	0.0774978
Q9VHC0	Q9VHC0	RnpS1	FALSE	0	0.26163	0.00767962	0.51558	28.1303	2.50039	0.045181	0.105308	-4.57026	0.0327801	0.104636
Q9VHC4	Q9VHC4	CG8176	FALSE	0	-0.341525	-0.65089	-0.0321606	27.0277	-2.6793	0.0353702	0.0889078	-4.31558	0.0276751	0.127468
Q9VHC7	Q9VHC7	rump	FALSE	0	-0.360175	-0.55697	-0.16338	33.3984	-4.4419	0.00401789	0.0226892	-1.98364	0.00706267	0.0810859
Q9VHE5	Q9VHE5	RpL34b	FALSE	0	-0.0419047	-0.27314	0.18933	27.0291	-0.439823	0.67496	0.758348	-6.94503	0.236057	0.0952763
Q9VHG6	Q9VHG6	Ibf2	FALSE	0	0.0278771	-0.188374	0.244128	28.2761	0.312866	0.764624	0.825923	-6.99883	0.257092	0.0891024
Q9VHH8	Q9VHH8	beag	FALSE	0	-0.105236	-0.397433	0.186962	29.0294	-0.87409	0.41459	0.522404	-6.63974	0.162613	0.120395
Q9VHI1	Q9VHI1	hyx	FALSE	0	0.216213	-0.108146	0.540572	28.3419	1.6178	0.155161	0.253809	-5.79805	0.0790054	0.133646
Q9VHI4	Q9VHI4	Sf3b5	TRUE	2	-0.508597	-1.21848	0.201285	25.0747	-1.73883	0.13105	0.222669	-5.63756	0.0693121	0.292495
Q9VHL1	Q9VHL1	CG9839	FALSE	0	-0.270321	-0.606792	0.0661495	25.9481	-1.94985	0.0974496	0.179691	-5.34908	0.0559339	0.138637
Q9VHL2	Q9VHL2	CCT7	FALSE	0	0.115453	-0.210075	0.440981	26.0774	0.860769	0.421351	0.527712	-6.6516	0.164265	0.134128
Q9VHM3	Q9VHM3	M1BP	FALSE	0	-0.146691	-0.382332	0.0889504	30.1145	-1.51085	0.179927	0.283165	-5.93595	0.088143	0.0970919
Q9VHM5	Q9VHM5	CG8159	TRUE	1	0.615678	0.258138	0.973217	24.8474	4.17925	0.0053942	0.0262815	-2.30352	0.00818086	0.147318
Q9VHN7	Q9VHN7	CG8036	FALSE	0	-0.294089	-0.530521	-0.0576572	26.3772	-3.01885	0.0224583	0.0657066	-3.83711	0.0204531	0.0974175
Q9VHP0	Q9VHP0	bel	FALSE	0	-0.461368	-0.634163	-0.288574	32.7319	-6.48017	0.000558447	0.00767958	0.158965	0.00239049	0.0711969
Q9VHP9	Q9VHP9	Cenp-C	FALSE	0	-0.34642	-0.53266	-0.16018	29.0777	-4.51439	0.00371076	0.0217547	-1.8972	0.00677177	0.0767368
Q9VHR5	Q9VHR5	CG9684	FALSE	0	-0.562788	-0.842655	-0.28292	26.6456	-4.88047	0.00251219	0.0177598	-1.47292	0.00552823	0.115314
Q9VHS0	Q9VHS0	CG9601	TRUE	3	0.415312	-0.138481	0.969105	24.6941	1.8201	0.116939	0.205748	-5.52759	0.0640448	0.228181
Q9VHS8	Q9VHS8	CG7483	FALSE	0	0.470417	0.272557	0.668278	29.4472	5.77022	0.00104854	0.0108091	-0.523028	0.00336465	0.081525
Q9VHT2	Q9VHT2	tex	FALSE	0	0.000247584	-0.352924	0.35342	26.2252	0.0017014	0.998696	0.998696	-7.0548	0.310873	0.145518
Q9VI10	Q9VI10	SmD2	FALSE	0	0.229451	-0.00508592	0.463987	25.6218	2.37436	0.0537844	0.118178	-4.74992	0.0367864	0.0966367
Q9VI18	Q9VI18	CG1024	FALSE	0	0.175079	-0.0346366	0.384794	27.1071	2.02615	0.0875376	0.165026	-5.24275	0.051369	0.0864095
Q9VI24	Q9VI24	Zif	TRUE	3	0.00216465	-0.237395	0.241724	24.7192	0.0219302	0.983191	0.987895	-7.05452	0.307511	0.0987063
Q9VI54	Q9VI54	CG1965	TRUE	4	0.616104	-0.194847	1.42706	24.4935	1.84386	0.113102	0.201071	-5.49515	0.062589	0.334138
Q9VI58	Q9VI58	Tailor	FALSE	0	-0.226086	-0.457484	0.00531249	26.4876	-2.37127	0.0540157	0.118357	-4.75432	0.0368419	0.0953435
Q9VI82	Q9VI82	CG1234	FALSE	0	0.219419	0.0409894	0.397849	30.0395	2.98453	0.0234973	0.0668367	-3.88505	0.0208048	0.0735189
Q9VID9	Q9VID9	CG8677	FALSE	0	-0.27376	-0.643522	0.0960024	27.8473	-1.79687	0.120814	0.210913	-5.55919	0.0656527	0.152354
Q9VIE8	Q9VIE8	mAcon1	TRUE	7	0.163521	-0.017115	0.344158	24.4219	2.19704	0.0688741	0.140679	-5.002	0.0437903	0.0744281
Q9VIF0	Q9VIF0	CG9246	FALSE	0	-0.018215	-0.178751	0.142321	30.5434	-0.275376	0.791962	0.847702	-7.01136	0.263872	0.066146
Q9VIF6	Q9VIF6	CG9253	FALSE	0	0.14975	-0.056615	0.356116	29.0423	1.76116	0.127014	0.218394	-5.6075	0.0679815	0.0850292
Q9VIG1	Q9VIG1	l(2)05287	FALSE	0	0.294323	0.0938642	0.494782	29.9133	3.56343	0.0112107	0.0409991	-3.09435	0.0127621	0.0825956
Q9VIH1	Q9VIH1	RPA2	FALSE	0	-0.561829	-0.815239	-0.308418	25.9406	-5.38081	0.00151813	0.01388	-0.925034	0.00432055	0.104413
Q9VIP0	Q9VIP0	nesd	FALSE	0	0.176148	-0.134057	0.486352	26.7433	1.37815	0.215754	0.323437	-6.10084	0.100679	0.127814
Q9VIP9	Q9VIP9	barr	FALSE	0	0.489221	0.0816542	0.896788	26.3859	2.91323	0.0258251	0.071861	-3.98498	0.0223688	0.167931
Q9VIS0	Q9VIS0	CG10466	TRUE	6	0.328677	-0.00232944	0.659683	24.5597	2.40991	0.0511967	0.115305	-4.69925	0.0358921	0.136385
Q9VIS4	Q9VIS4	CG10463	TRUE	7	0.773586	0.479739	1.06743	24.3157	6.38934	0.000603503	0.00807662	0.0751832	0.00251408	0.121075
Q9VIT3	Q9VIT3	msb1l	FALSE	0	-0.096077	-0.353642	0.161488	24.9722	-0.905319	0.399057	0.508673	-6.61136	0.158339	0.106125
Q9VIV2	Q9VIV2	swm	FALSE	0	-0.0795571	-0.292678	0.133563	27.2481	-0.905989	0.398729	0.508673	-6.61074	0.158339	0.0878125
Q9VIW3	Q9VIW3	RanGAP	FALSE	0	-0.0825914	-0.280294	0.115111	31.5707	-1.01389	0.348497	0.457905	-6.50694	0.142536	0.0814599
Q9VIW7	Q9VIW7	RtcB	FALSE	0	-0.338032	-0.59207	-0.0839936	27.0039	-3.22944	0.0170781	0.0548787	-3.54564	0.0170825	0.104672
Q9VIZ3	Q9VIZ3	l(2)37Cb	TRUE	1	0.154901	-0.531914	0.841715	25.1334	0.547372	0.603225	0.698232	-6.8862	0.217345	0.28299
Q9VJ11	Q9VJ11	CG10470	TRUE	1	0.159067	-0.659846	0.977981	26.0197	0.471424	0.653446	0.744579	-6.92898	0.231771	0.337419
Q9VJ12	Q9VJ12	Acn	FALSE	0	0.271732	0.0670356	0.476429	30.2563	3.2218	0.0172466	0.0553045	-3.55612	0.0172151	0.0843416
Q9VJ19	Q9VJ19	RpL30	FALSE	0	-0.256321	-0.439261	-0.0733807	29.4946	-3.40051	0.0137371	0.0468894	-3.31268	0.0145957	0.0753772
Q9VJ25	Q9VJ25	EMC5	TRUE	1	0.392757	-0.549683	1.3352	25.9019	1.01144	0.349581	0.458229	-6.50939	0.142637	0.388316
Q9VJ73	Q9VJ73	Atac2	TRUE	4	0.153993	-0.630714	0.938699	24.8613	0.476279	0.650172	0.741398	-6.92642	0.230781	0.323324
Q9VJ74	Q9VJ74	CG10333	FALSE	0	0.350766	0.137084	0.564449	27.9628	3.98399	0.00675984	0.0292482	-2.54813	0.00910434	0.0880439
Q9VJ77	Q9VJ77	CG15160	FALSE	0	-0.398393	-0.595933	-0.200853	27.9659	-4.89469	0.00247533	0.0177598	-1.45684	0.00552823	0.0813929
Q9VJ86	Q9VJ86	bsf	FALSE	0	0.520287	-0.221024	1.2616	25.9362	1.70338	0.137711	0.23067	-5.68501	0.0718025	0.305444
Q9VJ87	Q9VJ87	ncm	FALSE	0	0.464092	0.233773	0.69441	30.1588	4.89038	0.00248643	0.0177598	-1.4617	0.00552823	0.0948988
Q9VJE4	Q9VJE4	Rpb11	TRUE	6	-0.56876	-2.01565	0.878129	24.927	-0.954031	0.375714	0.485772	-6.56559	0.15121	0.596165
Q9VJG2	Q9VJG2	CG12288	TRUE	1	0.6611	-0.168541	1.49074	25.8486	1.93395	0.0996526	0.183094	-5.37112	0.0569931	0.341839
Q9VJH2	Q9VJH2	AspRS-m	TRUE	2	0.47584	-0.283725	1.2354	24.7477	1.52042	0.177567	0.281377	-5.92377	0.0875865	0.312965
Q9VJI6	Q9VJI6	BuGZ	FALSE	0	-0.18288	-0.584078	0.218318	28.023	-1.10631	0.309598	0.421581	-6.41147	0.131229	0.165306
Q9VJJ8	Q9VJJ8	mtgo	FALSE	0	-0.473618	-0.798431	-0.148805	25.3774	-3.53886	0.0115566	0.041474	-3.12704	0.01291	0.133833
Q9VJQ4	Q9VJQ4	Rnmt	TRUE	2	0.0759984	-0.789527	0.941524	25.3703	0.213105	0.83807	0.883862	-7.02872	0.275127	0.356624
Q9VJQ5	Q9VJQ5	NC2beta	TRUE	2	2.91811	1.72787	4.10835	26.895	5.95025	0.000889037	0.00968482	-0.344049	0.00301468	0.490418
Q9VJQ6	Q9VJQ6	DCTN5-p25	TRUE	3	-0.0278471	-0.415303	0.359609	24.4286	-0.174432	0.867075	0.904773	-7.03731	0.281637	0.159644
Q9VJY7	Q9VJY7	CG7099	TRUE	5	0.609543	-0.362505	1.58159	24.8031	1.5219	0.177206	0.281187	-5.92189	0.0875275	0.400515
Q9VJZ1	Q9VJZ1	CG9302	FALSE	0	-0.274339	-0.470395	-0.0782836	27.3782	-3.39608	0.013814	0.0469433	-3.31867	0.0146124	0.0807813
Q9VJZ7	Q9VJZ7	Nnp-1	FALSE	0	0.145423	-0.0241195	0.314965	29.326	2.08172	0.0809628	0.155657	-5.1648	0.0484527	0.069857
Q9VK18	Q9VK18	CG16812	FALSE	0	0.0273942	-0.188707	0.243496	27.2116	0.307659	0.7684	0.827673	-7.00066	0.257637	0.0890408
Q9VK58	Q9VK58	Pih1D1	FALSE	0	0.635697	0.478673	0.792721	28.4532	9.82544	5.17783e-05	0.00307637	2.67359	0.000957608	0.0646991
Q9VK59	Q9VK59	CG5787	FALSE	0	-0.100647	-0.265398	0.0641041	32.6714	-1.48266	0.187045	0.291381	-5.97159	0.0907006	0.0678828
Q9VK69	Q9VK69	CCT4	FALSE	0	-0.0689897	-0.335631	0.197652	27.8515	-0.62795	0.552415	0.654714	-6.83453	0.203799	0.109865
Q9VK89	Q9VK89	CG6388	TRUE	2	-0.892918	-1.32194	-0.463899	25.1853	-5.05131	0.00210741	0.015986	-1.28176	0.0049761	0.17677
Q9VKB4	Q9VKB4	CG6712	FALSE	0	0.156377	-0.0434177	0.356171	28.8966	1.89958	0.104586	0.190111	-5.41862	0.0591775	0.0823217
Q9VKC1	Q9VKC1	RpL7-like	FALSE	0	-0.178493	-0.35087	-0.00611658	30.3167	-2.51311	0.0443963	0.10427	-4.55212	0.0324571	0.0710248
Q9VKD3	Q9VKD3	Nfs1	FALSE	0	-0.27052	-0.459092	-0.0819484	26.5667	-3.4817	0.0124076	0.0434471	-3.20341	0.0135241	0.0776976
Q9VKD8	Q9VKD8	CG6686	FALSE	0	0.632817	0.0176917	1.24794	29.6345	2.4968	0.045405	0.10551	-4.57538	0.032843	0.253451
Q9VKG8	Q9VKG8	Dlg5	FALSE	0	-0.324672	-0.69723	0.0478859	28.5944	-2.11505	0.0772627	0.150517	-5.11789	0.0468528	0.153506
Q9VKI2	Q9VKI2	CG4788	TRUE	3	-0.564279	-0.8375	-0.291059	25.3347	-5.01245	0.00219258	0.0163486	-1.32487	0.00508896	0.112576
Q9VKJ1	Q9VKJ1	CG4751	TRUE	5	-0.0762328	-0.521315	0.36885	24.6739	-0.41569	0.69162	0.770921	-6.95659	0.239971	0.183388
Q9VKJ6	Q9VKJ6	CG6230	FALSE	0	0.315777	-0.156843	0.788397	26.2993	1.62158	0.154349	0.25275	-5.79311	0.0786756	0.194735
Q9VKK1	Q9VKK1	Ge-1	FALSE	0	0.0152423	-0.487055	0.51754	28.3242	0.0736477	0.943606	0.961764	-7.05167	0.299377	0.206963
Q9VKM2	Q9VKM2	SCAR	FALSE	0	-0.618557	-0.855309	-0.381805	29.664	-6.34095	0.000629185	0.00807662	0.0301549	0.00251408	0.0975495
Q9VKM7	Q9VKM7	CG33129	FALSE	0	-0.555556	-0.849054	-0.262059	29.4423	-4.59402	0.00340341	0.0209692	-1.8032	0.00652726	0.12093
Q9VKN7	Q9VKN7	aurB	FALSE	0	-0.649698	-1.09081	-0.208589	27.1239	-3.57465	0.0110564	0.0406283	-3.07943	0.0126467	0.181751
Q9VKU1	Q9VKU1	Fatp1	FALSE	0	-0.401332	-0.89079	0.0881269	26.247	-1.99001	0.0920993	0.172098	-5.29321	0.0535704	0.201673
Q9VKV5	Q9VKV5	holn1	FALSE	0	-0.388697	-0.643796	-0.133598	25.9923	-3.69804	0.00950674	0.0365974	-2.91672	0.011392	0.105109
Q9VKV8	Q9VKV8	Bug22	TRUE	5	0.447796	-0.0787011	0.974293	24.5334	2.06421	0.0829797	0.158135	-5.18941	0.0492241	0.216934
Q9VKW3	Q9VKW3	RfC3	FALSE	0	0.105812	-0.100111	0.311734	28.3425	1.24709	0.257337	0.367996	-6.25568	0.114549	0.0848466
Q9VKZ0	Q9VKZ0	GATAd	FALSE	0	0.0224634	-0.226847	0.271774	25.4844	0.218677	0.833912	0.881547	-7.02735	0.274407	0.102724
Q9VKZ7	Q9VKZ7	CG4972	FALSE	0	-0.412451	-0.763217	-0.0616859	26.2511	-2.85381	0.0279548	0.0755962	-4.0686	0.0235315	0.144527
Q9VL18	Q9VL18	eEF1delta	FALSE	0	-0.315128	-0.538669	-0.0915877	31.2149	-3.42137	0.0133812	0.0461879	-3.28453	0.0143773	0.092106
Q9VL25	Q9VL25	CG4901	FALSE	0	0.230902	0.0335566	0.428247	28.4868	2.83968	0.0284884	0.0764907	-4.08852	0.0238099	0.0813126
Q9VL29	Q9VL29	CG34159	TRUE	3	-0.997613	-2.52572	0.530493	26.0519	-1.58445	0.162517	0.261115	-5.84149	0.0812796	0.629629
Q9VL70	Q9VL70	yip2	FALSE	0	-0.112803	-0.408564	0.182959	27.2734	-0.925649	0.389184	0.499404	-6.59248	0.155454	0.121863
Q9VL71	Q9VL71	Srp54	FALSE	0	0.325762	0.045108	0.606416	29.3707	2.81707	0.0293651	0.0777668	-4.12042	0.0242071	0.115638
Q9VL72	Q9VL72	Etl1	TRUE	2	-0.00762106	-0.458558	0.443316	24.897	-0.0410174	0.968569	0.976837	-7.05383	0.304068	0.185801
Q9VL75	Q9VL75	Bka	FALSE	0	-0.458623	-0.861083	-0.056163	26.7505	-2.76568	0.0314671	0.081691	-4.19309	0.0254287	0.165826
Q9VL89	Q9VL89	und	FALSE	0	-0.102531	-0.65273	0.447668	26.3321	-0.452277	0.66644	0.752012	-6.93883	0.234085	0.2267
Q9VL91	Q9VL91	zf30C	FALSE	0	-0.284312	-0.437827	-0.130798	28.8336	-4.49485	0.00379088	0.0218902	-1.92043	0.00681394	0.0632529
Q9VL96	Q9VL96	CG4364	FALSE	0	-0.122663	-0.290867	0.0455412	30.976	-1.76989	0.125471	0.216834	-5.59573	0.0674956	0.0693055
Q9VLA6	Q9VLA6	brwl	TRUE	1	0.521211	-0.66131	1.70373	25.6309	1.06973	0.324548	0.435757	-6.44994	0.135642	0.487237
Q9VLD6	Q9VLD6	borr	FALSE	0	-0.458056	-0.758298	-0.157813	27.0957	-3.70267	0.00945341	0.0365256	-2.91065	0.0113697	0.12371
Q9VLK1	Q9VLK1	CG13097	FALSE	0	0.238535	0.0788762	0.398193	28.5152	3.626	0.01038	0.0389821	-3.01145	0.0121343	0.0657845
Q9VLK8	Q9VLK8	prg	FALSE	0	0.356773	0.172854	0.540691	26.5925	4.70798	0.003012	0.0193704	-1.67032	0.00602959	0.0757804
Q9VLL1	Q9VLL1	D12	FALSE	0	0.131142	-0.0283027	0.290586	26.1721	1.99618	0.0913041	0.17082	-5.28461	0.0531725	0.0656963
Q9VLN1	Q9VLN1	Wdr82	FALSE	0	0.0716086	-0.113861	0.257078	25.4248	0.937048	0.38373	0.493643	-6.58175	0.15366	0.0764193
Q9VLP7	Q9VLP7	Mettl14	TRUE	6	-0.171784	-0.421602	0.0780335	24.5305	-1.66889	0.144503	0.240474	-5.73082	0.0748543	0.102933
Q9VLT7	Q9VLT7	RpL36A	FALSE	0	0.342261	-0.0116449	0.696167	26.8625	2.34714	0.0558583	0.121013	-4.78871	0.0376688	0.145821
Q9VLV5	Q9VLV5	SmE	FALSE	0	-0.496777	-1.00148	0.00792913	26.3806	-2.38887	0.0527129	0.117343	-4.72925	0.0365265	0.207955
Q9VLX0	Q9VLX0	LKRSDH	TRUE	7	0.244509	-0.0072406	0.496258	24.3896	2.35719	0.055083	0.120011	-4.77439	0.0373567	0.103729
Q9VLX2	Q9VLX2	CG7154	FALSE	0	0.303279	0.0727588	0.533799	26.3109	3.19302	0.0178982	0.0567606	-3.59569	0.0176684	0.0949816
Q9VM17	Q9VM17	CG5181	FALSE	0	-0.119226	-0.332634	0.0941826	26.6868	-1.3559	0.222362	0.330305	-6.12773	0.102817	0.0879311
Q9VM49	Q9VM49	Caper	FALSE	0	0.167093	-0.0229292	0.357115	28.6756	2.13414	0.0752206	0.14821	-5.09096	0.0461347	0.0782952
Q9VM62	Q9VM62	SA	FALSE	0	0.525299	0.325143	0.725455	30.218	6.36952	0.000613875	0.00807662	0.0567737	0.00251408	0.0824708
Q9VM69	Q9VM69	nop5	FALSE	0	-0.0144311	-0.186458	0.157596	33.0047	-0.203597	0.845177	0.886137	-7.03099	0.275836	0.0708806
Q9VM72	Q9VM72	CG13773	TRUE	3	-0.238981	-0.963665	0.485702	24.9029	-0.800358	0.453026	0.558914	-6.7036	0.173978	0.298593
Q9VM75	Q9VM75	l(2)k09022	FALSE	0	0.304977	0.0848499	0.525104	31.5377	3.3625	0.0144124	0.0484409	-3.36412	0.0150786	0.0906994
Q9VM95	Q9VM95	Aatf	FALSE	0	-0.546636	-0.785137	-0.308135	28.8094	-5.56258	0.00127436	0.0125475	-0.734805	0.00390577	0.0982701
Q9VMC8	Q9VMC8	Phf5a	FALSE	0	0.182468	-0.162876	0.527811	26.6514	1.28234	0.24551	0.355089	-6.2149	0.110531	0.142293
Q9VMI5	Q9VMI5	CG9135	FALSE	0	-0.166762	-0.386847	0.0533227	25.5306	-1.83898	0.113881	0.201522	-5.50183	0.0627294	0.0906821
Q9VMJ1	Q9VMJ1	CG9107	FALSE	0	-0.206851	-0.448316	0.0346136	27.6011	-2.07909	0.0812631	0.15583	-5.1685	0.0485067	0.0994913
Q9VMM3	Q9VMM3	CG7239	FALSE	0	-0.0429234	-0.278385	0.192538	29.4393	-0.442428	0.673174	0.757505	-6.94375	0.235795	0.0970176
Q9VMM7	Q9VMM7	CG11030	FALSE	0	-0.171789	-0.357288	0.0137093	28.764	-2.24763	0.0641698	0.13392	-4.93025	0.0416863	0.0764314
Q9VMV5	Q9VMV5	vkg	FALSE	0	-0.654457	-0.908057	-0.400858	32.1738	-6.26327	0.00067307	0.00833738	-0.0427337	0.00259525	0.104491
Q9VMX3	Q9VMX3	CG3756	FALSE	0	-0.773889	-0.93988	-0.607898	28.1052	-11.3152	2.24478e-05	0.00307637	3.51947	0.000957608	0.0683937
Q9VN21	Q9VN21	lost	FALSE	0	0.0664365	-0.171063	0.303936	30.6106	0.67891	0.521681	0.626996	-6.79864	0.195171	0.0978576
Q9VN25	Q9VN25	eIF3a	FALSE	0	0.299598	0.0227413	0.576454	28.5699	2.62635	0.0380143	0.0928298	-4.39085	0.0288959	0.114074
Q9VN31	Q9VN31	Fip1	FALSE	0	0.110164	-0.230068	0.450396	27.951	0.78584	0.460886	0.56679	-6.71565	0.176429	0.140186
Q9VN39	Q9VN39	CG9775	FALSE	0	1.36292	1.11429	1.61154	29.2911	13.3044	8.50499e-06	0.00182951	4.46458	0.000569487	0.102441
Q9VN44	Q9VN44	Karybeta3	FALSE	0	0.0493858	-1.03713	1.1359	25.5366	0.110315	0.915639	0.94201	-7.04779	0.293227	0.447679
Q9VN50	Q9VN50	eIF3f1	FALSE	0	-0.38909	-0.69284	-0.0853409	26.5438	-3.10888	0.0199616	0.0610777	-3.71192	0.0190122	0.125155
Q9VN55	Q9VN55	atms	FALSE	0	0.247607	-0.0377609	0.532974	27.2143	2.10585	0.0782669	0.151982	-5.13085	0.0473088	0.117581
Q9VN88	Q9VN88	Vps37B	TRUE	5	0.262181	-0.114896	0.639257	24.6714	1.68749	0.140802	0.235335	-5.70616	0.0732546	0.155368
Q9VNA3	Q9VNA3	CG11999	FALSE	0	0.235017	-0.236987	0.707021	30.0782	1.20843	0.270875	0.381011	-6.29962	0.118601	0.194481
Q9VNB9	Q9VNB9	RpL35A	FALSE	0	-0.0683126	-0.265591	0.128966	29.7505	-0.840408	0.431842	0.537527	-6.66947	0.167321	0.0812851
Q9VND7	Q9VND7	CG2931	FALSE	0	0.190454	-0.147347	0.528254	25.474	1.36835	0.218642	0.325776	-6.11271	0.101407	0.139185
Q9VNE0	Q9VNE0	CG2926	FALSE	0	0.26456	0.104609	0.424511	28.2457	4.01426	0.00652494	0.0287787	-2.50983	0.00895819	0.065905
Q9VNE9	Q9VNE9	RpL13A	FALSE	0	0.259112	0.0848862	0.433339	31.5554	3.60947	0.0105927	0.0394869	-3.0333	0.0122914	0.0717868
Q9VNF7	Q9VNF7	MTA1-like	FALSE	0	0.383136	0.156669	0.609603	28.6555	4.10598	0.00586691	0.0271352	-2.39462	0.00844662	0.0933117
Q9VNG0	Q9VNG0	MED27	TRUE	5	-0.218575	-0.659133	0.221983	24.6077	-1.20411	0.272427	0.382494	-6.30448	0.119062	0.181524
Q9VNG2	Q9VNG2	Wdr33	FALSE	0	0.0889781	-0.201409	0.379365	26.4391	0.743661	0.484258	0.590334	-6.7496	0.183758	0.119649
Q9VNH6	Q9VNH6	Sec8	TRUE	1	0.365719	0.0330739	0.698365	24.9632	2.6683	0.0359027	0.0892522	-4.3312	0.0277823	0.137061
Q9VNI5	Q9VNI5	CG10979	TRUE	4	-0.00248556	-0.473642	0.468671	24.3104	-0.0128035	0.990186	0.992612	-7.0547	0.308979	0.194132
Q9VNI8	Q9VNI8	Hpr1	FALSE	0	0.670387	0.299084	1.04169	27.008	4.38193	0.00429352	0.0238081	-2.05574	0.00741096	0.152989
Q9VNP3	Q9VNP3	Mes2	FALSE	0	0.250176	0.047222	0.45313	29.043	2.99169	0.0232763	0.0667499	-3.87504	0.0207778	0.0836235
Q9VNV3	Q9VNV3	Ddx1	FALSE	0	-0.031716	-0.368837	0.305405	26.8794	-0.22833	0.826724	0.875757	-7.02488	0.272604	0.138905
Q9VNX8	Q9VNX8	CG7414	FALSE	0	-0.0768507	-0.312878	0.159177	26.4368	-0.790231	0.458499	0.564306	-6.71202	0.175656	0.0972509
Q9VNZ3	Q9VNZ3	Rpb8	FALSE	0	-1.23885	-1.8065	-0.671202	27.256	-5.29674	0.00164845	0.0144477	-1.01458	0.00449725	0.233889
Q9VP47	Q9VP47	Tsr1	FALSE	0	0.0290353	-0.166341	0.224411	25.6723	0.360681	0.730291	0.800661	-6.98061	0.249229	0.0805013
Q9VP57	Q9VP57	pzg	FALSE	0	0.194707	-0.00190966	0.391324	30.9507	2.40342	0.0516595	0.11589	-4.70851	0.0360741	0.0810126
Q9VP77	Q9VP77	CG10565	FALSE	0	0.122435	-0.152524	0.397394	26.1907	1.0807	0.320001	0.430782	-6.43849	0.134093	0.113292
Q9VPB8	Q9VPB8	Pex14	TRUE	2	0.416908	-0.611612	1.44543	25.8322	0.983776	0.361988	0.470401	-6.53677	0.146426	0.423783
Q9VPC0	Q9VPC0	Pitslre	FALSE	0	0.0901059	-0.0907876	0.271	28.1354	1.20892	0.2707	0.381011	-6.29907	0.118601	0.074534
Q9VPH2	Q9VPH2	DNApol-alpha60	FALSE	0	0.320302	-0.0562746	0.696879	27.8795	2.06431	0.0829675	0.158135	-5.18926	0.0492241	0.155162
Q9VPH4	Q9VPH4	kin17	TRUE	6	-0.166916	-0.510874	0.177042	24.5887	-1.17777	0.282044	0.393478	-6.33386	0.122481	0.141722
Q9VPH8	Q9VPH8	Rbbp5	FALSE	0	-0.213208	-0.446404	0.0199879	26.5592	-2.21897	0.0667927	0.13808	-4.97092	0.0429814	0.0960842
Q9VPJ9	Q9VPJ9	CG3164	TRUE	1	-0.283899	-0.891517	0.32372	25.4347	-1.13397	0.298677	0.409981	-6.38181	0.127618	0.250358
Q9VPK4	Q9VPK4	CG11454	TRUE	1	0.372569	-0.0594263	0.804564	24.26	2.09313	0.0796764	0.153941	-5.14875	0.0479185	0.177996
Q9VPL0	Q9VPL0	CG3436	FALSE	0	0.118635	-0.115624	0.352893	28.1483	1.2291	0.263564	0.374683	-6.27624	0.116631	0.0965221
Q9VPM5	Q9VPM5	mbm	FALSE	0	-0.346361	-0.575316	-0.117406	27.1993	-3.67154	0.00981817	0.0375142	-2.95148	0.0116774	0.0943367
Q9VPM7	Q9VPM7	CG17078	FALSE	0	-0.175745	-0.37416	0.0226696	26.8465	-2.1497	0.0735968	0.145708	-5.06898	0.0453556	0.0817533
Q9VPQ2	Q9VPQ2	shv	FALSE	0	0.0331204	-0.313865	0.380106	30.4449	0.231661	0.824247	0.874339	-7.024	0.272163	0.142969
Q9VPQ7	Q9VPQ7	Spp	FALSE	0	0.359772	-0.0120458	0.73159	28.3014	2.34837	0.0557628	0.120977	-4.78696	0.0376575	0.153201
Q9VPR4	Q9VPR4	Nle	TRUE	2	-0.39034	-0.668444	-0.112235	24.9216	-3.40646	0.0136346	0.0467025	-3.30464	0.0145375	0.114588
Q9VPR5	Q9VPR5	Sf3b1	FALSE	0	0.0650598	-0.188582	0.318702	30.1493	0.62253	0.555749	0.658158	-6.83821	0.20487	0.104509
Q9VPT8	Q9VPT8	Clp	TRUE	3	-0.369076	-1.77763	1.03948	25.3916	-0.635934	0.547527	0.650003	-6.82907	0.202332	0.580369
Q9VPU4	Q9VPU4	CG4291	TRUE	2	0.223701	-0.288148	0.73555	24.2343	1.06071	0.328325	0.438909	-6.4593	0.136623	0.210898
Q9VPU7	Q9VPU7	aru	TRUE	3	-0.330863	-0.834034	0.172309	24.8766	-1.59588	0.159959	0.258356	-5.82664	0.0804206	0.207323
Q9VPU8	Q9VPU8	dbe	FALSE	0	0.021534	-0.228125	0.271193	27.0962	0.209337	0.840884	0.884136	-7.02963	0.275213	0.102868
Q9VPY0	Q9VPY0	IntS14	FALSE	0	0.117029	-0.246011	0.48007	28.2817	0.782364	0.462782	0.567758	-6.7185	0.176731	0.149584
Q9VPY4	Q9VPY4	CG4887	FALSE	0	0.616969	-0.201792	1.43573	26.5175	1.82884	0.115513	0.203941	-5.51568	0.0634824	0.337356
Q9VQ27	Q9VQ27	CG14352	TRUE	3	-1.2501	-2.6994	0.199205	25.5856	-2.09341	0.0796455	0.153941	-5.14836	0.0479185	0.59716
Q9VQ30	Q9VQ30	chinmo	FALSE	0	0.0481894	-0.303908	0.400287	26.0163	0.332168	0.750689	0.816035	-6.99178	0.254014	0.145076
Q9VQ58	Q9VQ58	CG15356	FALSE	0	0.254246	0.0932464	0.415246	27.4876	3.83264	0.00808431	0.0326821	-2.74171	0.0101732	0.0663371
Q9VQ76	Q9VQ76	tho2	FALSE	0	0.385073	0.169883	0.600263	29.1674	4.343	0.00448383	0.0242506	-2.10285	0.00754868	0.0886652
Q9VQ77	Q9VQ77	CG11723	FALSE	0	-0.296083	-0.474095	-0.118072	24.7948	-4.03678	0.00635609	0.0284089	-2.48143	0.00884309	0.0733464
Q9VQ94	Q9VQ94	Sec24CD	TRUE	4	0.21383	-0.935045	1.36271	24.7616	0.451715	0.666823	0.752012	-6.93911	0.234085	0.473374
Q9VQD8	Q9VQD8	Arpc5	FALSE	0	0.163747	-0.100974	0.428468	25.8605	1.50125	0.182322	0.286639	-5.94812	0.0892246	0.109074
Q9VQF5	Q9VQF5	Cwc25	TRUE	2	0.870314	0.526091	1.21454	25.1332	6.13627	0.000752548	0.00889164	-0.163498	0.00276778	0.141831
Q9VQI6	Q9VQI6	CG8814	TRUE	1	-0.245545	-1.14363	0.652543	25.3163	-0.663561	0.530821	0.636488	-6.80971	0.198125	0.370041
Q9VQJ6	Q9VQJ6	CG9641	FALSE	0	-0.195214	-0.461989	0.0715597	27.0118	-1.77598	0.124405	0.215673	-5.5875	0.0671343	0.10992
Q9VQK5	Q9VQK5	CG3542	FALSE	0	0.186952	-0.0183159	0.39222	27.8029	2.21044	0.0675949	0.139177	-4.98302	0.0433227	0.0845771
Q9VQK7	Q9VQK7	Sf3b2	FALSE	0	0.346511	0.163348	0.529674	27.9499	4.59142	0.00341295	0.0209692	-1.80624	0.00652726	0.0754691
Q9VQM4	Q9VQM4	gkt	TRUE	5	0.562768	0.0759388	1.0496	24.0477	2.80557	0.029822	0.0783019	-4.13667	0.0243737	0.200589
Q9VQR8	Q9VQR8	LeuRS	FALSE	0	-0.0150847	-0.242603	0.212433	28.3204	-0.160913	0.87727	0.912313	-7.03991	0.283983	0.0937448
Q9VQR9	Q9VQR9	CG17593	FALSE	0	-0.245856	-0.644923	0.153211	25.9384	-1.49521	0.183843	0.287853	-5.95575	0.0896024	0.164429
Q9VQZ8	Q9VQZ8	CG15439	FALSE	0	0.268874	-0.00835964	0.546108	25.5825	2.35381	0.0553423	0.120235	-4.7792	0.0374264	0.114229
Q9VR56	Q9VR56	CG14618	TRUE	4	-1.34026	-2.11398	-0.566538	25.2008	-4.2041	0.00524362	0.0259813	-2.2728	0.00808742	0.318798
Q9VR89	Q9VR89	l(1)G0004	FALSE	0	0.0894893	-0.162454	0.341433	27.0958	0.862058	0.420693	0.527712	-6.65046	0.164265	0.103809
Q9VR99	Q9VR99	cactin	FALSE	0	0.301041	0.111287	0.490794	27.3372	3.85039	0.00791504	0.0323338	-2.71884	0.0100648	0.0781845
Q9VRG7	Q9VRG7	Dd	TRUE	1	-0.379289	-0.720263	-0.0383157	25.0486	-2.69972	0.0344031	0.0876337	-4.28659	0.0272785	0.140492
Q9VRI0	Q9VRI0	Hlc	FALSE	0	0.244182	0.0401897	0.448175	28.8422	2.90515	0.0261042	0.0722452	-3.99634	0.0224884	0.0840516
Q9VRJ2	Q9VRJ2	Fitm	TRUE	6	0.673031	-0.011085	1.35715	24.1888	2.38767	0.0528004	0.117368	-4.73096	0.0365342	0.281878
Q9VRJ4	Q9VRJ4	CG10672	FALSE	0	-0.459101	-0.730625	-0.187576	25.6633	-4.10363	0.00588284	0.0271352	-2.39756	0.00844662	0.111877
Q9VRJ7	Q9VRJ7	CG4611	TRUE	5	0.277231	-0.164619	0.719081	24.5297	1.52278	0.176992	0.281137	-5.92077	0.0875118	0.182056
Q9VRL0	Q9VRL0	Cyt-c1	FALSE	0	-0.929519	-1.27398	-0.585063	26.3427	-6.54927	0.000526737	0.00762955	0.22204	0.00237492	0.141927
Q9VRL8	Q9VRL8	blanks	FALSE	0	-0.449291	-0.673264	-0.225317	30.0713	-4.86854	0.00254356	0.0177598	-1.48642	0.00552823	0.0922844
Q9VRM6	Q9VRM6	l(3)psg2	FALSE	0	0.246116	0.0811705	0.411062	25.8867	3.62133	0.0104396	0.0391104	-3.01763	0.0121742	0.067963
Q9VRP2	Q9VRP2	CG10576	TRUE	3	-0.175256	-0.536	0.185488	24.6012	-1.17908	0.281561	0.393162	-6.33242	0.122383	0.148638
Q9VRP5	Q9VRP5	scny	FALSE	0	-0.119091	-0.310389	0.0722063	28.7686	-1.51091	0.179911	0.283165	-5.93587	0.088143	0.0788208
Q9VRQ2	Q9VRQ2	mad2	FALSE	0	-0.71879	-0.918538	-0.519043	26.7683	-8.73352	0.000103032	0.00390936	1.95963	0.0012169	0.0823025
Q9VRV4	Q9VRV4	D19B	FALSE	0	-0.0299082	-0.247099	0.187282	27.77	-0.33421	0.749221	0.815016	-6.99101	0.253697	0.0894895
Q9VRV5	Q9VRV5	D19A	FALSE	0	-0.0656461	-0.27084	0.139548	28.6274	-0.77645	0.46602	0.570364	-6.72334	0.177542	0.0845465
Q9VRV7	Q9VRV7	Sf3b6	FALSE	0	-0.392129	-0.921808	0.13755	26.3845	-1.79674	0.120836	0.210913	-5.55936	0.0656527	0.218245
Q9VRX7	Q9VRX7	Rexo5	FALSE	0	0.378348	-0.0182611	0.774958	27.0198	2.31525	0.0583931	0.124745	-4.83411	0.0388305	0.163416
Q9VRY4	Q9VRY4	velo	TRUE	1	-0.793647	-1.61794	0.0306485	25.8805	-2.33676	0.0566707	0.122084	-4.80349	0.0380023	0.339636
Q9VS37	Q9VS37	Cdc27	FALSE	0	0.702647	0.105687	1.29961	27.6799	2.85667	0.0278479	0.0754399	-4.06456	0.0234828	0.245967
Q9VS38	Q9VS38	MED4	TRUE	5	-0.128462	-0.419417	0.162492	24.3671	-1.07157	0.323782	0.435109	-6.44803	0.13544	0.119883
Q9VS55	Q9VS55	CTCF	FALSE	0	0.188446	0.0170882	0.359804	26.7669	2.66902	0.0358677	0.0892522	-4.33018	0.0277823	0.070605
Q9VS57	Q9VS57	Sec63	TRUE	5	0.666979	0.00176346	1.33219	24.7356	2.43343	0.0495568	0.112769	-4.66573	0.0351026	0.27409
Q9VSD6	Q9VSD6	msk	TRUE	3	0.0432259	-0.564629	0.65108	25.0771	0.172589	0.868463	0.905607	-7.03767	0.281896	0.250456
Q9VSF2	Q9VSF2	MED24	FALSE	0	0.332052	0.116342	0.547762	24.6552	3.73597	0.00907968	0.035487	-2.86713	0.0110463	0.0888795
Q9VSL9	Q9VSL9	CG6638	TRUE	5	0.253419	-0.159296	0.666133	24.5122	1.49024	0.185105	0.289238	-5.96203	0.0900335	0.170052
Q9VSN9	Q9VSN9	SrpRbeta	FALSE	0	-0.235266	-0.651311	0.180779	25.9145	-1.37242	0.217439	0.324889	-6.10779	0.101131	0.171424
Q9VSS2	Q9VSS2	Srp68	TRUE	2	-0.278106	-1.76105	1.20484	25.2343	-0.455149	0.664483	0.752012	-6.93738	0.234085	0.611022
Q9VSW5	Q9VSW5	Klp67A	FALSE	0	0.689239	0.47856	0.899919	27.7701	7.93992	0.000178358	0.00516903	1.38115	0.00160901	0.0868068
Q9VT00	Q9VT00	Jarid2	FALSE	0	-0.354548	-0.935763	0.226666	25.062	-1.4805	0.187602	0.291656	-5.97431	0.0907862	0.239479
Q9VT19	Q9VT19	CG3335	FALSE	0	0.357835	-0.0412511	0.75692	26.7795	2.17613	0.0709207	0.142958	-5.03161	0.0444998	0.164436
Q9VT32	Q9VT32	Prps	FALSE	0	-0.64777	-0.825097	-0.470444	26.5661	-8.86577	9.44247e-05	0.0038264	2.0509	0.00119108	0.0730642
Q9VT38	Q9VT38	CG18178	FALSE	0	0.239497	0.0582229	0.420772	26.347	3.20651	0.0175896	0.0561697	-3.57714	0.0174844	0.0746909
Q9VT41	Q9VT41	defl	FALSE	0	0.558624	0.212192	0.905056	26.1258	3.91354	0.00734372	0.0307356	-2.63781	0.00956732	0.142741
Q9VT57	Q9VT57	Cdk8	FALSE	0	-0.16496	-0.438019	0.108098	25.0189	-1.4662	0.191321	0.29505	-5.99226	0.0918426	0.112509
Q9VT61	Q9VT61	CG8108	FALSE	0	0.260846	0.0249159	0.496776	30.9468	2.6833	0.0351782	0.0886654	-4.30989	0.0275996	0.0972107
Q9VTC1	Q9VTC1	CG6418	FALSE	0	-0.54275	-0.729142	-0.356359	28.7739	-7.06713	0.000344948	0.00648715	0.677427	0.00201931	0.0767992
Q9VTE6	Q9VTE6	CG7839	FALSE	0	0.200569	0.0322456	0.368893	30.3377	2.89193	0.0265677	0.073264	-4.01492	0.0228055	0.0693547
Q9VTH2	Q9VTH2	CG42671	FALSE	0	-0.67359	-1.26478	-0.0823972	26.3073	-2.76526	0.0314851	0.081691	-4.19369	0.0254287	0.24359
Q9VTL1	Q9VTL1	PCID2	TRUE	1	0.16322	-0.54769	0.874131	25.7796	0.557221	0.596874	0.694336	-6.88023	0.216132	0.292918
Q9VTP4	Q9VTP4	RpL10Ab	FALSE	0	0.0372676	-0.191864	0.266399	30.5434	0.394743	0.706235	0.781504	-6.96612	0.243265	0.0944097
Q9VTT2	Q9VTT2	vers	FALSE	0	-0.0248892	-0.198823	0.149044	27.318	-0.347294	0.739839	0.807684	-6.98596	0.251415	0.0716662
Q9VTT3	Q9VTT3	ssp	FALSE	0	-0.0449823	-0.241799	0.151834	26.1063	-0.554689	0.598503	0.694336	-6.88177	0.216132	0.0810947
Q9VTU0	Q9VTU0	CG5645	FALSE	0	-0.190396	-0.6075	0.226707	26.5076	-1.10786	0.308979	0.42111	-6.40982	0.131083	0.17186
Q9VTU4	Q9VTU4	eIF3l	FALSE	0	-0.218863	-0.451285	0.0135579	28.9014	-2.28542	0.0608719	0.128787	-4.87654	0.0400886	0.095765
Q9VTZ0	Q9VTZ0	tral	FALSE	0	-0.355592	-0.5761	-0.135085	28.7024	-3.91379	0.00734157	0.0307356	-2.63749	0.00956732	0.0908562
Q9VTZ1	Q9VTZ1	Gcn5	TRUE	1	0.518754	0.281001	0.756507	24.9998	5.29546	0.00165052	0.0144477	-1.01595	0.00449725	0.097962
Q9VU02	Q9VU02	SmD1	FALSE	0	0.445389	0.0677855	0.822992	28.6351	2.86268	0.0276253	0.0750373	-4.0561	0.0233575	0.155585
Q9VU15	Q9VU15	Sf3a2	FALSE	0	0.232436	-0.0195836	0.484456	25.6246	2.2384	0.0650025	0.135107	-4.94335	0.0420558	0.10384
Q9VU43	Q9VU43	Srrm1	FALSE	0	0.596869	0.404217	0.789521	28.3567	7.51924	0.000243181	0.00549304	1.0514	0.00170986	0.0793789
Q9VU65	Q9VU65	Poc1	TRUE	5	-0.257536	-0.823724	0.308652	24.6715	-1.10394	0.310549	0.4225	-6.41399	0.131515	0.233288
Q9VUB5	Q9VUB5	upSET	FALSE	0	0.30347	0.129928	0.477013	27.9055	4.24403	0.0050114	0.0254233	-2.22363	0.00791373	0.0715052
Q9VUB7	Q9VUB7	Ptip	TRUE	1	0.0991717	-0.413887	0.612231	25.2421	0.469126	0.654999	0.745796	-6.93018	0.23215	0.211397
Q9VUC3	Q9VUC3	CG6833	FALSE	0	0.0378381	-0.269996	0.345672	26.5064	0.298319	0.775191	0.833819	-7.00388	0.25955	0.126838
Q9VUC6	Q9VUC6	Frl	FALSE	0	-0.295324	-0.745797	0.155148	25.9505	-1.59111	0.161022	0.259527	-5.83284	0.0807852	0.185609
Q9VUE5	Q9VUE5	stwl	FALSE	0	0.466405	0.274752	0.658058	29.5947	5.90632	0.00092525	0.0100083	-0.387334	0.00311538	0.0789671
Q9VUH8	Q9VUH8	Tdrd3	TRUE	6	0.370759	-0.0514934	0.793011	24.3796	2.13102	0.07555	0.148395	-5.09535	0.0461921	0.173982
Q9VUM1	Q9VUM1	Prp31	FALSE	0	-0.0926119	-0.26588	0.0806559	27.097	-1.29723	0.240659	0.3507	-6.19748	0.109165	0.0713919
Q9VUN7	Q9VUN7	CG7275	FALSE	0	0.127547	-0.109272	0.364365	28.8985	1.30714	0.237477	0.346735	-6.18582	0.107931	0.0975768
Q9VUQ5	Q9VUQ5	AGO2	FALSE	0	-0.680101	-0.847559	-0.512644	29.7626	-9.85683	5.08163e-05	0.00307637	2.69285	0.000957608	0.068998
Q9VUR2	Q9VUR2	CG12301	FALSE	0	-0.0659672	-0.234987	0.103052	30.4407	-0.947241	0.378904	0.489483	-6.57208	0.152366	0.0696414
Q9VUV9	Q9VUV9	l(3)72Ab	FALSE	0	0.526426	0.369637	0.683215	31.8849	8.14874	0.000153701	0.00481807	1.53869	0.00149976	0.0646021
Q9VUZ0	Q9VUZ0	SsRbeta	TRUE	3	-2.05832	-3.16869	-0.947946	26.0013	-4.49896	0.00377385	0.0218902	-1.91553	0.00681394	0.457509
Q9VUZ6	Q9VUZ6	l(3)72Dn	FALSE	0	0.30935	0.109686	0.509015	28.4814	3.76027	0.00881735	0.0350867	-2.83548	0.0109217	0.0822681
Q9VV52	Q9VV52	RAF2	FALSE	0	0.113021	-0.0567086	0.28275	31.5703	1.61611	0.155527	0.253867	-5.80027	0.0790235	0.069934
Q9VV75	Q9VV75	UQCR-C2	FALSE	0	-0.54961	-0.797089	-0.30213	28.0231	-5.38993	0.00150471	0.01388	-0.915381	0.00432055	0.10197
Q9VVA7	Q9VVA7	TSG101	TRUE	3	-0.413165	-0.789919	-0.0364108	24.804	-2.66155	0.0362341	0.0899122	-4.3408	0.0279877	0.155235
Q9VVA9	Q9VVA9	Zcchc7	FALSE	0	0.0211132	-0.238814	0.28104	26.7639	0.197138	0.850014	0.889388	-7.03247	0.276847	0.107098
Q9VVC5	Q9VVC5	Nc73EF	FALSE	0	-0.0628718	-0.294215	0.168471	25.576	-0.659583	0.533206	0.637854	-6.81254	0.19855	0.0953207
Q9VVC9	Q9VVC9	CG7728	FALSE	0	0.189091	0.0276023	0.35058	29.9972	2.84182	0.0284067	0.0764907	-4.08549	0.0238099	0.0665387
Q9VVG4	Q9VVG4	Sec3	TRUE	3	0.0536425	-0.472527	0.579812	24.7206	0.24743	0.812554	0.864922	-7.01969	0.269232	0.216799
Q9VVH5	Q9VVH5	UQCR-Q	FALSE	0	0.614298	0.128141	1.10045	28.4691	3.0667	0.0210917	0.063766	-3.77047	0.019849	0.200312
Q9VVI0	Q9VVI0	U4-U6-60K	FALSE	0	-0.532091	-0.78046	-0.283722	28.3442	-5.19944	0.00181533	0.0150721	-1.11946	0.00469163	0.102336
Q9VVI1	Q9VVI1	CG7564	FALSE	0	0.0877401	-0.100046	0.275527	27.7306	1.13397	0.298675	0.409981	-6.3818	0.127618	0.0773741
Q9VVI2	Q9VVI2	Edc3	TRUE	1	-0.59543	-0.991324	-0.199535	25.4538	-3.65023	0.0100768	0.0381232	-2.97951	0.0118669	0.163121
Q9VVK8	Q9VVK8	CG5589	FALSE	0	0.40878	0.144169	0.673392	27.1248	3.7493	0.00893477	0.0351366	-2.84976	0.0109373	0.109029
Q9VVL8	Q9VVL8	TrpRS-m	TRUE	1	-0.748213	-1.37742	-0.119006	25.3715	-2.88603	0.0267776	0.0733161	-4.02322	0.0228217	0.259254
Q9VVU2	Q9VVU2	RpL26	FALSE	0	-0.425273	-0.635712	-0.214834	28.8869	-4.90467	0.00244984	0.0177598	-1.44557	0.00552823	0.0867077
Q9VVU6	Q9VVU6	CG6841	FALSE	0	0.0277679	-0.150932	0.206467	29.0718	0.377128	0.718632	0.78957	-6.97377	0.245776	0.07363
Q9VVV7	Q9VVV7	CG3808	TRUE	4	-0.548558	-0.806275	-0.29084	24.7132	-5.16592	0.0018772	0.0151757	-1.15592	0.00472387	0.106188
Q9VW10	Q9VW10	CG9300	FALSE	0	0.0228295	-0.151307	0.196966	29.6367	0.318182	0.760776	0.822345	-6.99693	0.255978	0.0717499
Q9VW37	Q9VW37	SREBP	TRUE	2	0.303361	-0.511869	1.11859	25.1817	0.903126	0.400133	0.509622	-6.61338	0.158635	0.335901
Q9VW47	Q9VW47	kto	FALSE	0	-0.428895	-0.74467	-0.113121	26.6279	-3.29643	0.0156745	0.0512255	-3.45398	0.0159454	0.130109
Q9VW52	Q9VW52	Prp3	FALSE	0	0.137082	-0.113526	0.387691	26.2479	1.32756	0.231038	0.338971	-6.16163	0.105514	0.103259
Q9VW53	Q9VW53	Mtr3	FALSE	0	-0.444579	-0.705871	-0.183286	27.6612	-4.12944	0.00571071	0.0271352	-2.36536	0.00844662	0.107661
Q9VW54	Q9VW54	Rpn1	TRUE	7	0.201739	-0.176301	0.579779	24.7137	1.29515	0.241332	0.3507	-6.19992	0.109165	0.155765
Q9VWA8	Q9VWA8	FRG1	TRUE	3	0.564586	-0.0261766	1.15535	24.7586	2.31945	0.058052	0.124362	-4.82812	0.0387113	0.243413
Q9VWC7	Q9VWC7	CG12702	FALSE	0	0.33609	0.0893034	0.582877	28.5972	3.30524	0.0154994	0.0507615	-3.44197	0.015801	0.101684
Q9VWD0	Q9VWD0	parvin	TRUE	1	-0.502369	-0.781898	-0.222839	24.8766	-4.36178	0.00439087	0.0241734	-2.08009	0.00752466	0.115175
Q9VWD4	Q9VWD4	CG14230	FALSE	0	0.324523	0.0204403	0.628605	27.7394	2.59014	0.0399429	0.0966761	-4.44239	0.0300932	0.125292
Q9VWG1	Q9VWG1	CG14207	TRUE	7	-0.615014	-1.68062	0.450595	24.8976	-1.40073	0.209231	0.31663	-6.07332	0.09856	0.439065
Q9VWG2	Q9VWG2	CG14220	FALSE	0	0.593005	0.223486	0.962523	27.0724	3.89485	0.00750789	0.0313373	-2.66173	0.00975463	0.152253
Q9VWI1	Q9VWI1	pcm	TRUE	3	-0.030236	-0.708957	0.648485	24.7747	-0.108119	0.91731	0.943098	-7.04807	0.293566	0.279655
Q9VWK5	Q9VWK5	Ulp1	FALSE	0	0.395654	0.179115	0.612193	29.6776	4.43453	0.00405067	0.0227906	-1.99247	0.00709421	0.0892211
Q9VWL4	Q9VWL4	CG7556	FALSE	0	-0.255985	-0.579954	0.0679845	27.9426	-1.91769	0.101957	0.186435	-5.39362	0.0580332	0.133486
Q9VWN4	Q9VWN4	Flacc	FALSE	0	0.378235	0.10108	0.655389	26.8917	3.31214	0.0153638	0.0506411	-3.43256	0.0157635	0.114196
Q9VWP1	Q9VWP1	Usp39	FALSE	0	0.0702491	-0.119245	0.259743	25.9663	0.899736	0.401802	0.511323	-6.61649	0.159164	0.0780775
Q9VWP5	Q9VWP5	htk	FALSE	0	0.170047	-0.0249223	0.365016	29.0844	2.11676	0.0770773	0.150517	-5.11547	0.0468528	0.0803335
Q9VWQ6	Q9VWQ6	CG18259	FALSE	0	0.389539	0.189979	0.589099	27.3064	4.73747	0.00291915	0.0193704	-1.63626	0.00602959	0.0822251
Q9VWS2	Q9VWS2	Nup35	FALSE	0	-0.481933	-0.707238	-0.256627	28.5289	-5.19138	0.00182999	0.0151122	-1.12821	0.0047041	0.0928332
Q9VWY6	Q9VWY6	Taf8	FALSE	0	-0.164384	-0.408603	0.0798345	25.6971	-1.63362	0.151784	0.249883	-5.77733	0.0777832	0.100626
Q9VWZ1	Q9VWZ1	Ada3	TRUE	7	0.0688475	-0.383149	0.520844	24.3591	0.369676	0.723904	0.794226	-6.9769	0.247225	0.186237
Q9VX09	Q9VX09	Arp8	FALSE	0	0.344451	-0.00139	0.690291	25.0963	2.41724	0.0506799	0.114658	-4.68881	0.0356905	0.142497
Q9VX15	Q9VX15	CG8142	FALSE	0	-0.0124085	-0.241024	0.216207	27.4468	-0.131729	0.899363	0.928375	-7.04481	0.288983	0.0941971
Q9VX31	Q9VX31	IntS2	FALSE	0	0.650274	0.444206	0.856343	26.6572	7.65868	0.000219089	0.00546178	1.16259	0.00170013	0.0849068
Q9VX32	Q9VX32	RhoGAPp190	TRUE	5	0.357467	0.116355	0.59858	24.3296	3.5982	0.0107404	0.0397525	-3.04822	0.0123741	0.0993463
Q9VX34	Q9VX34	CG5800	FALSE	0	0.0684804	-0.133528	0.270489	28.5958	0.822745	0.441095	0.546829	-6.68469	0.170216	0.0832341
Q9VX38	Q9VX38	CG8326	TRUE	4	0.076983	-0.449388	0.603354	24.4644	0.354954	0.734369	0.803413	-6.98292	0.250085	0.216882
Q9VXE6	Q9VXE6	Nup153	FALSE	0	0.273009	0.0502185	0.495799	30.421	2.97406	0.0238246	0.0674892	-3.8997	0.021008	0.0917969
Q9VXE9	Q9VXE9	SMC3	FALSE	0	0.635182	0.451276	0.819087	28.9374	8.38247	0.000130618	0.00426871	1.71042	0.00132876	0.075775
Q9VXG1	Q9VXG1	hang	FALSE	0	0.0804015	-0.108654	0.269457	27.5488	1.03215	0.340513	0.450344	-6.48853	0.140182	0.077897
Q9VXK5	Q9VXK5	CG8939	FALSE	0	0.0700908	-0.0970814	0.237263	30.6658	1.01757	0.346875	0.456765	-6.50324	0.142181	0.0688803
Q9VXL4	Q9VXL4	Rrp47	TRUE	1	-0.533398	-0.956572	-0.110225	25.1884	-3.05916	0.0213011	0.0639925	-3.78096	0.0199195	0.174361
Q9VXN4	Q9VXN4	ArgRS	FALSE	0	0.00126181	-0.271455	0.273979	28.3681	0.0112293	0.991393	0.992685	-7.05472	0.309002	0.112368
Q9VXQ2	Q9VXQ2	Graf	FALSE	0	-0.141022	-0.375274	0.0932302	24.8815	-1.46107	0.192671	0.296536	-5.99867	0.0923054	0.0965193
Q9VXQ5	Q9VXQ5	CCT6	FALSE	0	-0.344837	-1.02732	0.337642	25.7903	-1.22629	0.264547	0.375203	-6.27943	0.116793	0.281204
Q9VXR5	Q9VXR5	CG9281	FALSE	0	-0.258459	-0.473681	-0.0432369	26.7913	-2.91456	0.0257794	0.071861	-3.98311	0.0223688	0.0886784
Q9VXW2	Q9VXW2	CG6227	TRUE	6	0.267779	-0.104842	0.6404	24.5717	1.74413	0.130081	0.221759	-5.63044	0.0690287	0.153532
Q9VXW3	Q9VXW3	CG12608	FALSE	0	-0.170559	-0.420222	0.0791036	26.6498	-1.65802	0.146711	0.24362	-5.7452	0.0758336	0.102869
Q9VXW9	Q9VXW9	CG5877	FALSE	0	0.389713	0.127398	0.652027	26.5331	3.6057	0.0106418	0.0394869	-3.03828	0.0122914	0.108082
Q9VY44	Q9VY44	mRNA-cap	FALSE	0	-0.282337	-0.712361	0.147688	25.2231	-1.59347	0.160496	0.258951	-5.82977	0.0806058	0.177184
Q9VY54	Q9VY54	l(1)G0007	TRUE	7	0.370271	0.143955	0.596588	24.5841	3.97076	0.00686549	0.0296219	-2.56493	0.00922066	0.0932496
Q9VY97	Q9VY97	mus101	TRUE	5	0.0798807	-0.639924	0.799685	24.829	0.269337	0.796397	0.851263	-7.01324	0.26498	0.296583
Q9VYE3	Q9VYE3	CG15747	TRUE	6	-1.01205	-1.41722	-0.606876	24.7539	-6.06219	0.000803827	0.00914576	-0.234876	0.00284688	0.166945
Q9VYE9	Q9VYE9	CG1622	FALSE	0	-0.437977	-0.696701	-0.179253	29.5323	-4.10851	0.00584987	0.0271352	-2.39147	0.00844662	0.106603
Q9VYG2	Q9VYG2	Bap60	FALSE	0	-0.190581	-0.400996	0.0198332	29.6989	-2.19823	0.0687594	0.140661	-5.00032	0.0437847	0.0866976
Q9VYK0	Q9VYK0	Smr	FALSE	0	-0.474687	-0.870973	-0.0784002	26.6132	-2.90714	0.026035	0.0721838	-3.99353	0.0224693	0.163283
Q9VYQ9	Q9VYQ9	Tango4	FALSE	0	0.0822141	-0.091606	0.256034	28.5094	1.14793	0.293289	0.405799	-6.36665	0.126317	0.0716195
Q9VYW4	Q9VYW4	CG1703	FALSE	0	0.0484604	-0.282545	0.379466	26.3901	0.355321	0.734108	0.803413	-6.98278	0.250085	0.136385
Q9VYW5	Q9VYW5	CG2247	FALSE	0	0.208241	0.0120476	0.404434	28.7184	2.57603	0.0407219	0.0979225	-4.46248	0.0304812	0.0808379
Q9VYY7	Q9VYY7	HP5	FALSE	0	-0.49317	-0.735997	-0.250343	28.9701	-4.92911	0.00238866	0.0175549	-1.41806	0.00546447	0.100053
Q9VZ02	Q9VZ02	CG1738	TRUE	1	-0.101222	-0.748637	0.546193	25.4608	-0.379455	0.716988	0.788893	-6.97278	0.245565	0.266756
Q9VZ04	Q9VZ04	GCS1	FALSE	0	0.124973	-0.0969761	0.346922	25.4713	1.36657	0.219171	0.326209	-6.11487	0.101542	0.0914502
Q9VZ20	Q9VZ20	Dlic	FALSE	0	-0.133421	-0.506143	0.239301	26.6851	-0.868777	0.417277	0.525255	-6.64449	0.163501	0.153573
Q9VZ22	Q9VZ22	Lint-1	TRUE	4	0.445505	-0.341839	1.23285	24.7696	1.37327	0.217188	0.324831	-6.10676	0.101113	0.324411
Q9VZ27	Q9VZ27	CDK2AP1	FALSE	0	-0.136571	-0.540997	0.267856	25.9388	-0.819571	0.442772	0.548025	-6.68739	0.170588	0.166637
Q9VZ60	Q9VZ60	CG2186	FALSE	0	-0.148148	-0.545151	0.248855	26.9077	-0.905671	0.398885	0.508673	-6.61104	0.158339	0.163578
Q9VZ62	Q9VZ62	feo	FALSE	0	-0.0103906	-0.303258	0.282477	28.8018	-0.0861067	0.934091	0.955224	-7.05053	0.297341	0.120671
Q9VZ69	Q9VZ69	Imp	FALSE	0	-0.134371	-0.37952	0.110778	26.8553	-1.33028	0.230193	0.33835	-6.1584	0.105321	0.101009
Q9VZC8	Q9VZC8	CG15019	FALSE	0	-0.0432563	-0.519821	0.433308	28.3943	-0.220291	0.832709	0.880882	-7.02694	0.2742	0.19636
Q9VZE4	Q9VZE4	CG1316	FALSE	0	-0.453754	-0.728216	-0.179292	28.8082	-4.01243	0.00653891	0.0287787	-2.51215	0.00895819	0.113087
Q9VZE6	Q9VZE6	CG11583	FALSE	0	-0.0356615	-0.24306	0.171737	30.9176	-0.417314	0.690493	0.770223	-6.95583	0.239754	0.0854548
Q9VZF5	Q9VZF5	pav	FALSE	0	0.193456	-0.198399	0.585311	30.3482	1.19819	0.274564	0.38477	-6.31112	0.119771	0.161457
Q9VZI2	Q9VZI2	Ack	FALSE	0	-0.474973	-0.729586	-0.22036	26.3845	-4.52748	0.00365816	0.0215285	-1.88168	0.00670136	0.104909
Q9VZJ3	Q9VZJ3	Rcd5	FALSE	0	0.131554	-0.0828191	0.345928	28.3608	1.48937	0.185327	0.289291	-5.96313	0.09005	0.0883288
Q9VZL3	Q9VZL3	Sc2	FALSE	0	0.0409138	-0.225859	0.307686	28.5607	0.372218	0.722104	0.792817	-6.97584	0.246787	0.109919
Q9VZP5	Q9VZP5	eIF5B	FALSE	0	0.197042	-0.137721	0.531806	28.1899	1.42853	0.201446	0.30727	-6.03912	0.0956467	0.137933
Q9VZQ1	Q9VZQ1	Ythdc1	FALSE	0	-0.00612962	-0.270446	0.258187	27.0158	-0.0562831	0.956884	0.969507	-7.05297	0.301787	0.108907
Q9VZQ3	Q9VZQ3	kst	FALSE	0	0.100734	-0.65056	0.852028	26.8827	0.325413	0.755554	0.819584	-6.99429	0.255119	0.309557
Q9VZS5	Q9VZS5	RpL28	FALSE	0	0.0017469	-0.181867	0.185361	29.3701	0.0230904	0.982302	0.987895	-7.05449	0.307511	0.0756547
Q9VZV8	Q9VZV8	CG16753	FALSE	0	0.513407	0.130363	0.896452	27.5422	3.25299	0.0165697	0.0538786	-3.51336	0.0167713	0.157827
Q9VZY0	Q9VZY0	Non2	TRUE	4	-0.0644591	-0.695136	0.566218	25.0778	-0.248054	0.812092	0.864922	-7.01951	0.269232	0.259859
Q9W002	Q9W002	msn	FALSE	0	-0.0889398	-0.269695	0.0918159	28.8991	-1.19419	0.276016	0.386121	-6.3156	0.120191	0.0744772
Q9W020	Q9W020	CG9004	FALSE	0	0.633576	0.237509	1.02964	26.2708	3.88239	0.00761964	0.0316318	-2.67771	0.00984631	0.163192
Q9W039	Q9W039	CG9018	FALSE	0	-0.0268402	-0.238523	0.184842	25.4683	-0.30773	0.768349	0.827673	-7.00064	0.257637	0.08722
Q9W047	Q9W047	CG5704	TRUE	5	0.28721	-0.0160059	0.590427	24.379	2.29888	0.0597401	0.126832	-4.8574	0.0394802	0.124935
Q9W061	Q9W061	mu2	TRUE	2	0.238119	-0.281126	0.757364	25.0493	1.11299	0.306932	0.419811	-6.40435	0.130678	0.213946
Q9W062	Q9W062	Mfap1	TRUE	7	0.548481	0.0509585	1.046	24.5361	2.67558	0.0355494	0.0889313	-4.32087	0.0276824	0.204996
Q9W074	Q9W074	HBS1	FALSE	0	-0.374784	-0.729929	-0.0196398	25.4927	-2.56121	0.0415575	0.0992726	-4.48358	0.0309014	0.146331
Q9W0A8	Q9W0A8	RpL23A	FALSE	0	-0.397833	-0.624382	-0.171284	30.5239	-4.26195	0.00491096	0.0252282	-2.20166	0.007853	0.0933454
Q9W0B2	Q9W0B2	CG7970	TRUE	1	-0.300875	-0.80267	0.200919	24.1696	-1.45522	0.194222	0.298326	-6.00597	0.0928623	0.206756
Q9W0B8	Q9W0B8	alphaCOP	FALSE	0	0.0537279	-0.17513	0.282586	29.3853	0.569774	0.588835	0.687795	-6.87247	0.214096	0.0942969
Q9W0D6	Q9W0D6	CG7879	FALSE	0	0.216491	0.0037892	0.429192	25.7797	2.47023	0.0470994	0.108626	-4.61326	0.0338129	0.0876399
Q9W0H8	Q9W0H8	scf	TRUE	1	-0.773812	-1.26131	-0.286311	25.4667	-3.85238	0.0078963	0.0323338	-2.71628	0.0100648	0.200866
Q9W0L7	Q9W0L7	Usp10	FALSE	0	-0.757045	-0.936759	-0.577331	28.5532	-10.2237	4.09711e-05	0.00307637	2.91311	0.000957608	0.074048
Q9W0M4	Q9W0M4	CG13887	FALSE	0	-0.577267	-0.758689	-0.395845	26.8074	-7.72246	0.000208991	0.00546178	1.2128	0.00170013	0.0747518
Q9W0M7	Q9W0M7	Sf3b3	FALSE	0	0.564097	0.369135	0.759058	28.5997	7.02221	0.000357494	0.00655744	0.639095	0.00204119	0.0803304
Q9W0P3	Q9W0P3	MED30	FALSE	0	0.155607	-0.104689	0.415904	26.2123	1.45087	0.195383	0.299509	-6.01139	0.0932307	0.107251
Q9W0P8	Q9W0P8	MED14	FALSE	0	0.172973	-0.0684401	0.414386	27.711	1.73895	0.131028	0.222669	-5.6374	0.0693121	0.09947
Q9W0R0	Q9W0R0	Cdc5	FALSE	0	0.0699921	-0.103441	0.243425	30.3742	0.979461	0.363955	0.472157	-6.54099	0.146972	0.0714599
Q9W0R7	Q9W0R7	Atac3	FALSE	0	0.436383	0.185563	0.687202	26.2239	4.22255	0.00513487	0.0258042	-2.25005	0.00803231	0.103346
Q9W0S7	Q9W0S7	Tudor-SN	FALSE	0	0.120006	-0.0612077	0.301219	29.1335	1.60724	0.157456	0.255928	-5.81184	0.0796648	0.0746657
Q9W0T7	Q9W0T7	Dis3l2	FALSE	0	-0.491836	-0.769518	-0.214154	25.2876	-4.29874	0.00471164	0.0246999	-2.15667	0.00768856	0.114414
Q9W102	Q9W102	Orc4	FALSE	0	0.253723	0.0479319	0.459513	25.8931	2.99228	0.0232582	0.0667499	-3.87421	0.0207778	0.0847924
Q9W107	Q9W107	TyrRS-m	TRUE	4	-0.0810579	-0.313194	0.151078	24.6753	-0.847465	0.428184	0.53384	-6.66331	0.166173	0.0956475
Q9W124	Q9W124	CG4806	FALSE	0	0.296227	0.121627	0.470826	29.1631	4.11766	0.00578859	0.0271352	-2.38005	0.00844662	0.0719406
Q9W135	Q9W135	CG42360	TRUE	5	0.171159	-0.314028	0.656345	24.4946	0.856168	0.423705	0.529545	-6.65567	0.164836	0.199913
Q9W137	Q9W137	CG4707	TRUE	3	0.324688	0.00531032	0.644066	24.5825	2.46735	0.0472872	0.108732	-4.61737	0.033846	0.131594
Q9W140	Q9W140	CG3548	FALSE	0	0.0284724	-0.174397	0.231342	27.8372	0.340624	0.744615	0.810581	-6.98856	0.252316	0.0835889
Q9W141	Q9W141	ATPsynF	TRUE	7	0.218624	-0.0292764	0.466524	24.6068	2.14037	0.0745659	0.147215	-5.08216	0.0458248	0.102143
Q9W149	Q9W149	CG11414	FALSE	0	-0.433721	-0.706554	-0.160887	25.1381	-3.85817	0.00784205	0.0322069	-2.70882	0.0100253	0.112416
Q9W158	Q9W158	CG4612	FALSE	0	-0.0837939	-0.380933	0.213345	26.9089	-0.684417	0.518426	0.624061	-6.79462	0.194257	0.122431
Q9W198	Q9W198	ocm	TRUE	2	0.368181	0.109765	0.626597	24.8586	3.45788	0.0127824	0.044521	-3.23538	0.0138584	0.106476
Q9W1A2	Q9W1A2	Naa35	TRUE	3	0.165615	-0.183907	0.515136	24.8319	1.14999	0.2925	0.405122	-6.36441	0.126106	0.144014
Q9W1A9	Q9W1A9	enok	FALSE	0	0.0943182	-0.0935168	0.282153	28.4437	1.21867	0.26723	0.377961	-6.28806	0.117651	0.0773941
Q9W1B9	Q9W1B9	RpL12	FALSE	0	-0.169957	-0.351764	0.01185	28.3442	-2.26881	0.0622996	0.131085	-4.90016	0.040804	0.0749104
Q9W1C5	Q9W1C5	IntS1	FALSE	0	0.525173	0.306943	0.743403	28.7046	5.84058	0.000982615	0.0102673	-0.45257	0.003196	0.0899179
Q9W1C8	Q9W1C8	CG3163	FALSE	0	-0.0200616	-0.21792	0.177797	28.6147	-0.246082	0.813551	0.865384	-7.02007	0.269376	0.081524
Q9W1F4	Q9W1F4	thoc5	FALSE	0	0.188212	-0.104974	0.481397	27.661	1.55802	0.168578	0.270007	-5.87563	0.0840473	0.120802
Q9W1F7	Q9W1F7	Stoml2	FALSE	0	-0.337988	-0.599434	-0.0765414	25.7475	-3.13753	0.0192315	0.0597968	-3.67226	0.0186135	0.107724
Q9W1G1	Q9W1G1	CG3735	FALSE	0	-0.208346	-0.375565	-0.041127	29.0529	-3.02391	0.0223095	0.0655207	-3.83006	0.0203952	0.0688997
Q9W1G7	Q9W1G7	Nap1	FALSE	0	-0.632819	-1.23777	-0.0278674	27.7357	-2.53879	0.0428559	0.101584	-4.51552	0.031621	0.24926
Q9W1H4	Q9W1H4	DNAlig1	TRUE	6	0.158826	-0.48324	0.800891	24.8185	0.600358	0.569515	0.670325	-6.85294	0.208658	0.264552
Q9W1H5	Q9W1H5	DCP1	FALSE	0	-0.589048	-0.863119	-0.314977	25.3043	-5.21622	0.00178523	0.0149842	-1.10127	0.00466427	0.112926
Q9W1H8	Q9W1H8	Mtpbeta	FALSE	0	-0.49948	-0.68664	-0.312319	26.3404	-6.47697	0.000559969	0.00767958	0.156027	0.00239049	0.0771163
Q9W1I0	Q9W1I0	TBPH	FALSE	0	-0.37823	-0.627625	-0.128835	26.9769	-3.68075	0.00970863	0.0371882	-2.93938	0.0115759	0.102759
Q9W1I6	Q9W1I6	ytr	TRUE	1	0.438829	0.0646758	0.812982	25.1815	2.84652	0.0282286	0.0762024	-4.07887	0.0237202	0.154163
Q9W1I8	Q9W1I8	Snap29	TRUE	2	-0.219221	-0.727075	0.288633	24.6974	-1.04764	0.333857	0.443271	-6.47274	0.137981	0.209252
Q9W1M9	Q9W1M9	Rrp4	TRUE	3	-0.126835	-0.301888	0.0482182	24.5282	-1.75848	0.127492	0.218803	-5.61112	0.0681086	0.0721276
Q9W1N3	Q9W1N3	levy	FALSE	0	-0.0702252	-0.477368	0.336917	26.4299	-0.418615	0.689591	0.769776	-6.95522	0.239615	0.167756
Q9W1R5	Q9W1R5	vir	FALSE	0	0.2694	0.113272	0.425528	29.5298	4.18779	0.0053419	0.0262641	-2.29294	0.00817544	0.0643298
Q9W1V3	Q9W1V3	Fib	FALSE	0	-0.176925	-0.348238	-0.00561209	33.6319	-2.5065	0.0448022	0.1048	-4.56155	0.0326221	0.0705865
Q9W1X4	Q9W1X4	Nup214	FALSE	0	-0.0439097	-0.373837	0.286018	28.9443	-0.323006	0.757291	0.82031	-6.99518	0.255345	0.135941
Q9W1X7	Q9W1X7	MED23	FALSE	0	0.207519	0.0188862	0.396152	26.3246	2.66999	0.0358205	0.0892522	-4.32881	0.0277823	0.0777229
Q9W1X9	Q9W1X9	asrij	TRUE	2	-0.524038	-1.69342	0.645344	25.1888	-1.08762	0.317165	0.42809	-6.43124	0.133255	0.481823
Q9W1Y1	Q9W1Y1	EMC8-9	FALSE	0	0.078911	-0.281253	0.439076	26.9618	0.531747	0.613378	0.708383	-6.89548	0.220504	0.148399
Q9W229	Q9W229	RpS24	FALSE	0	0.0894568	-0.108055	0.286969	29.434	1.09923	0.312446	0.424205	-6.41898	0.132046	0.0813814
Q9W246	Q9W246	CG4554	FALSE	0	0.394823	0.129273	0.660373	30.4898	3.60848	0.0106055	0.0394869	-3.03461	0.0122914	0.109415
Q9W254	Q9W254	qkr58E-2	FALSE	0	-0.665725	-0.919253	-0.412198	26.1915	-6.37293	0.000612076	0.00807662	0.0599439	0.00251408	0.104461
Q9W255	Q9W255	qkr58E-1	FALSE	0	-0.809698	-1.05559	-0.563804	31.9731	-7.99178	0.000171836	0.00516903	1.42064	0.00160901	0.101316
Q9W2D9	Q9W2D9	eIF3k	FALSE	0	-0.247103	-0.478682	-0.0155245	25.8151	-2.58969	0.039967	0.0966761	-4.44301	0.0300932	0.095418
Q9W2E3	Q9W2E3	NC2alpha	FALSE	0	0.928749	0.701135	1.15636	25.1494	9.90302	4.94377e-05	0.00307637	2.72106	0.000957608	0.0937845
Q9W2E7	Q9W2E7	Rae1	FALSE	0	-0.385812	-0.577791	-0.193834	28.7003	-4.87746	0.00252008	0.0177598	-1.47633	0.00552823	0.0791012
Q9W2G5	Q9W2G5	TAF1C-like	FALSE	0	0.0410345	-0.133392	0.215461	26.8692	0.570959	0.588079	0.687435	-6.87173	0.213984	0.0718693
Q9W2I4	Q9W2I4	Sgf29	TRUE	6	0.0187488	-0.583409	0.620907	24.6418	0.0755668	0.94214	0.960907	-7.05151	0.29911	0.248108
Q9W2K3	Q9W2K3	hng1	FALSE	0	0.00648848	-0.18507	0.198047	27.1694	0.0822072	0.937068	0.957005	-7.0509	0.297895	0.0789284
Q9W2N0	Q9W2N0	cpa	TRUE	5	-1.72428	-2.59095	-0.857617	25.2594	-4.82864	0.00265179	0.0181837	-1.53176	0.00566021	0.357095
Q9W2N6	Q9W2N6	CG9346	FALSE	0	0.594466	0.376431	0.8125	26.9932	6.61714	0.000497579	0.00742021	0.283445	0.00230975	0.0898373
Q9W2N8	Q9W2N8	CG10543	TRUE	3	-0.497399	-0.894146	-0.100652	24.8691	-3.04271	0.0217654	0.064916	-3.80386	0.0202069	0.163473
Q9W2S1	Q9W2S1	Tango5	FALSE	0	0.124777	-0.104791	0.354344	25.1711	1.31914	0.233674	0.342157	-6.17163	0.106506	0.0945892
Q9W2U7	Q9W2U7	nocte	FALSE	0	-1.1335	-1.49667	-0.770327	28.6622	-7.5749	0.000233218	0.00546178	1.09601	0.00170013	0.149639
Q9W2Y5	Q9W2Y5	ZAP3	TRUE	4	-3.24001	-4.8472	-1.63282	26.2802	-4.89268	0.00248051	0.0177598	-1.45911	0.00552823	0.662216
Q9W335	Q9W335	l(1)G0320	FALSE	0	-0.455618	-0.71278	-0.198456	27.493	-4.29994	0.0047053	0.0246999	-2.15521	0.00768856	0.105959
Q9W351	Q9W351	Aladin	FALSE	0	0.21774	-0.0793269	0.514806	27.5964	1.7789	0.123896	0.215065	-5.58353	0.0669451	0.122401
Q9W363	Q9W363	mxc	FALSE	0	0.488192	0.257852	0.718533	28.6191	5.14387	0.00191919	0.0152739	-1.17998	0.00475445	0.0949076
Q9W384	Q9W384	Bap111	FALSE	0	-0.924245	-1.25345	-0.595039	30.6979	-6.81379	0.000422964	0.00692252	0.458396	0.00215483	0.135643
Q9W392	Q9W392	CCT2	FALSE	0	0.250412	-0.443067	0.943891	25.0658	0.876376	0.413438	0.521808	-6.63769	0.162428	0.285736
Q9W394	Q9W394	CG32708	FALSE	0	-0.284127	-0.513342	-0.0549113	25.5187	-3.00841	0.022769	0.0661119	-3.85168	0.0205792	0.0944441
Q9W396	Q9W396	HP1b	FALSE	0	-0.211664	-0.490918	0.067589	25.0667	-1.83958	0.113785	0.201522	-5.50101	0.0627294	0.115061
Q9W397	Q9W397	CG7246	FALSE	0	0.264644	0.0546145	0.474674	27.6645	3.05809	0.0213308	0.0639925	-3.78244	0.0199195	0.086539
Q9W3B2	Q9W3B2	Rbm13	FALSE	0	-0.529505	-0.783497	-0.275513	28.9123	-5.05963	0.00208965	0.015986	-1.27256	0.0049761	0.104653
Q9W3C0	Q9W3C0	CG1789	FALSE	0	-0.522383	-0.857886	-0.186879	25.2854	-3.77885	0.00862233	0.0344893	-2.81133	0.0107358	0.138238
Q9W3C1	Q9W3C1	l(1)G0020	FALSE	0	0.24741	0.0482875	0.446532	30.5315	3.01554	0.0225562	0.0658675	-3.84172	0.0205031	0.0820448
Q9W3C2	Q9W3C2	CG1785	FALSE	0	0.0474867	-0.118328	0.213301	29.3121	0.695054	0.512178	0.617993	-6.78677	0.192368	0.068321
Q9W3D1	Q9W3D1	Caf1-180	FALSE	0	-0.0545202	-0.317442	0.208402	26.6395	-0.503268	0.632126	0.722968	-6.91176	0.225044	0.108332
Q9W3E0	Q9W3E0	CG12112	TRUE	5	0.200404	-0.201354	0.602162	24.5814	1.21063	0.270091	0.381011	-6.29715	0.118601	0.165537
Q9W3E1	Q9W3E1	IntS4	FALSE	0	0.638467	0.375492	0.901442	26.9264	5.89241	0.000937066	0.0100653	-0.401093	0.0031331	0.108354
Q9W3K3	Q9W3K3	CG2260	FALSE	0	0.314518	0.099214	0.529821	28.9006	3.54538	0.0114637	0.0414636	-3.11835	0.0129067	0.088712
Q9W3K4	Q9W3K4	CG1575	FALSE	0	0.133447	-0.105027	0.371922	27.3218	1.35812	0.221695	0.329646	-6.12506	0.102612	0.0982591
Q9W3M4	Q9W3M4	l(1)G0193	FALSE	0	-0.398544	-0.621157	-0.175931	25.4624	-4.34504	0.00447358	0.0242506	-2.10036	0.00754868	0.0917238
Q9W3M7	Q9W3M7	mahe	FALSE	0	-0.919669	-1.17154	-0.667801	28.3183	-8.86192	9.46636e-05	0.0038264	2.04826	0.00119108	0.103778
Q9W3N1	Q9W3N1	spidey	FALSE	0	-0.381825	-0.708074	-0.0555762	28.5921	-2.84043	0.0284598	0.0764907	-4.08746	0.0238099	0.134425
Q9W3Q5	Q9W3Q5	CHES-1-like	TRUE	3	-0.963441	-1.33787	-0.589012	25.0811	-6.24489	0.000683961	0.00840451	-0.0600932	0.00261614	0.154277
Q9W3R9	Q9W3R9	CG1677	FALSE	0	-0.433296	-0.632508	-0.234084	27.4832	-5.27883	0.00167782	0.0144477	-1.03379	0.00449725	0.0820819
Q9W3W1	Q9W3W1	pod1	FALSE	0	-0.135756	-0.334654	0.0631429	25.4005	-1.65651	0.14702	0.243869	-5.74719	0.0759111	0.0819527
Q9W3W6	Q9W3W6	sov	FALSE	0	0.119168	-0.122334	0.360669	27.182	1.19759	0.274782	0.38477	-6.31179	0.119771	0.0995064
Q9W3X1	Q9W3X1	CG14440	FALSE	0	-0.364655	-0.995884	0.266574	25.041	-1.40205	0.208856	0.316374	-6.07171	0.0984804	0.260087
Q9W3Y0	Q9W3Y0	CG3224	TRUE	1	-0.724649	-1.09857	-0.350726	25.2381	-4.70343	0.00302663	0.0193704	-1.67559	0.00602959	0.154068
Q9W401	Q9W401	kdn	FALSE	0	-0.126141	-0.302558	0.0502759	26.8127	-1.73534	0.131691	0.223511	-5.64224	0.0695741	0.0726895
Q9W403	Q9W403	CG3847	FALSE	0	-0.49507	-0.684944	-0.305196	25.9184	-6.32805	0.000636244	0.00807662	0.0180979	0.00251408	0.0782342
Q9W410	Q9W410	CG3815	FALSE	0	-0.534311	-0.849292	-0.219331	27.3006	-4.11699	0.00579301	0.0271352	-2.38088	0.00844662	0.129782
Q9W424	Q9W424	Spx	FALSE	0	-0.177243	-0.524787	0.170301	29.4799	-1.23774	0.260558	0.371259	-6.26639	0.115565	0.143199
Q9W425	Q9W425	Rbcn-3A	TRUE	3	-0.612468	-3.89391	2.66898	26.925	-0.452989	0.665955	0.752012	-6.93847	0.234085	1.35206
Q9W445	Q9W445	MCTS1	TRUE	7	0.289456	0.06431	0.514603	24.5474	3.12023	0.0196687	0.0606173	-3.69619	0.0188689	0.0927676
Q9W464	Q9W464	GAA1	TRUE	4	-0.0176258	-0.487018	0.451767	24.4685	-0.0911344	0.930255	0.953216	-7.05001	0.296716	0.193405
Q9W485	Q9W485	IntS6	FALSE	0	0.300913	0.123248	0.478577	27.3808	4.11063	0.00583556	0.0271352	-2.38882	0.00844662	0.0732035
Q9W499	Q9W499	RpL35	FALSE	0	0.306422	-0.086888	0.699732	29.0185	1.89084	0.105879	0.192007	-5.43067	0.0597678	0.162057
Q9W4B2	Q9W4B2	Vsx1	TRUE	3	0.987818	0.382098	1.59354	25.1064	3.95798	0.0069692	0.0297462	-2.58116	0.00925935	0.249576
Q9W4C1	Q9W4C1	CG15784	FALSE	0	0.366909	-0.0459327	0.77975	29.3977	2.15697	0.072851	0.145135	-5.05871	0.0451774	0.170104
Q9W4C4	Q9W4C4	spoon	TRUE	6	0.4241	-0.0811718	0.929372	24.5866	2.0371	0.0862012	0.163463	-5.22742	0.0508825	0.208188
Q9W4H8	Q9W4H8	Pp2C1	FALSE	0	-0.0085945	-0.388011	0.370822	25.4851	-0.054976	0.957884	0.969881	-7.05306	0.301903	0.156332
Q9W4J5	Q9W4J5	CG3527	FALSE	0	-0.380736	-0.603364	-0.158107	28.8985	-4.15061	0.0055737	0.0268383	-2.33903	0.00835419	0.09173
Q9W4K1	Q9W4K1	rb	FALSE	0	0.122093	-0.0801112	0.324297	25.4322	1.46544	0.191519	0.295059	-5.9932	0.0918455	0.0833147
Q9W4M9	Q9W4M9	Nsun2	FALSE	0	0.061973	-0.130514	0.25446	26.4079	0.781392	0.463312	0.567955	-6.7193	0.176792	0.079311
Q9W4N8	Q9W4N8	Vap33	FALSE	0	-0.228583	-0.39929	-0.057877	30.0811	-3.24985	0.0166364	0.0539105	-3.51766	0.0167812	0.0703366
Q9W4R1	Q9W4R1	CG2875	FALSE	0	-0.0297394	-0.194042	0.134563	28.6793	-0.439296	0.675322	0.758348	-6.94529	0.236057	0.067698
Q9W4W7	Q9W4W7	CG2662	FALSE	0	0.180434	-0.0308018	0.39167	25.0256	2.0731	0.0819498	0.156756	-5.17692	0.0487947	0.087036
Q9W4X7	Q9W4X7	eIF3g1	TRUE	3	-1.314	-1.70418	-0.923824	25.5853	-8.17336	0.000151061	0.00481807	1.55701	0.00149976	0.160767
Q9W4Y3	Q9W4Y3	trol	FALSE	0	-0.162458	-0.601202	0.276287	28.3354	-0.898664	0.40233	0.511572	-6.61747	0.159241	0.180777
Q9W4Z9	Q9W4Z9	CG3071	FALSE	0	-0.231523	-0.430218	-0.0328267	31.0772	-2.82796	0.0289393	0.0769044	-4.10505	0.0239387	0.0818691
Q9W526	Q9W526	CG16903	FALSE	0	0.416758	0.24888	0.584637	28.0884	6.02502	0.000831048	0.00931745	-0.270953	0.00290032	0.0691713
Q9W531	Q9W531	CG4281	TRUE	6	0.315026	-0.0231162	0.653169	24.4647	2.26108	0.0629753	0.132145	-4.91114	0.0411339	0.139326
Q9W542	Q9W542	mip130	FALSE	0	0.518227	0.260065	0.776389	30.4968	4.87188	0.00253473	0.0177598	-1.48264	0.00552823	0.106371
Q9W543	Q9W543	Rbcn-3B	TRUE	4	-0.82694	-2.5762	0.922316	25.4129	-1.14733	0.293517	0.405799	-6.36731	0.126317	0.72075
Q9W550	Q9W550	CG14805	FALSE	0	-0.731256	-0.898916	-0.563596	29.857	-10.5855	3.33559e-05	0.00307637	3.1219	0.000957608	0.0690812
Q9W592	Q9W592	Lrpprc2	TRUE	4	0.258654	-0.00128038	0.518589	24.61	2.41504	0.0508345	0.114658	-4.69194	0.0356905	0.107102
Q9W5C2	Q9W5C2	TRAM	FALSE	0	0.132185	-0.120484	0.384853	25.2865	1.26969	0.249697	0.359789	-6.22961	0.111995	0.104107
Q9W5E4	Q9W5E4	Mybbp1A	FALSE	0	0.402648	0.197766	0.60753	30.4314	4.7697	0.00282132	0.0189238	-1.59917	0.00589056	0.084418
Q9XYZ4	Q9XYZ4	mre11	FALSE	0	0.10483	-0.0740726	0.283732	26.8749	1.42212	0.203217	0.309051	-6.04704	0.0962011	0.0737136
Q9XYZ5	Q9XYZ5	pic	FALSE	0	0.486396	0.270984	0.701809	27.857	5.48009	0.00137902	0.0130428	-0.820569	0.00405995	0.088757
Q9XYZ6	Q9XYZ6	CG5808	FALSE	0	0.41214	0.0829952	0.741284	26.0933	3.03897	0.0218724	0.0649742	-3.80906	0.0202251	0.135618
Q9XZ03	Q9XZ03	mbf1	FALSE	0	-0.439767	-0.685216	-0.194318	26.3454	-4.34841	0.00445682	0.0242506	-2.09629	0.00754868	0.101133
Q9XZ06	Q9XZ06	Nup93-1	FALSE	0	0.433287	0.0663021	0.800273	30.2389	2.86547	0.0275224	0.0749546	-4.05216	0.0233318	0.15121
Q9XZ11	Q9XZ11	CG7139	TRUE	4	-0.402937	-1.42129	0.615415	24.773	-0.960302	0.372787	0.482393	-6.55957	0.150159	0.419594
Q9XZ19	Q9XZ19	CG3909	TRUE	4	-1.02204	-1.73461	-0.309476	25.1834	-3.48106	0.0124175	0.0434471	-3.20427	0.0135241	0.293601
Q9XZ21	Q9XZ21	snama	FALSE	0	0.150229	-0.0258895	0.326348	29.5447	2.07022	0.0822811	0.157194	-5.18096	0.0489311	0.0725665
Q9XZ29	Q9XZ29	Klp3A	FALSE	0	0.611231	0.392629	0.829834	25.7484	6.78609	0.000432657	0.00692252	0.434017	0.00215483	0.0900712
Q9XZ34	Q9XZ34	Rif1	FALSE	0	0.57651	0.279213	0.873808	29.4395	4.70635	0.00301721	0.0193704	-1.6722	0.00602959	0.122496
Q9XZ53	Q9XZ53	Stt3B	FALSE	0	0.116987	-0.189141	0.423114	27.6403	0.927477	0.388305	0.498693	-6.59077	0.155232	0.126134
Q9XZ57	Q9XZ57	Eb1	FALSE	0	0.416124	0.0665584	0.765689	30.1816	2.8891	0.0266681	0.0732665	-4.0189	0.0228063	0.144032
Q9XZ61	Q9XZ61	Uch-L5	TRUE	4	0.510327	-0.149602	1.17026	24.7436	1.87681	0.107987	0.194757	-5.44997	0.0606236	0.271912
Q9XZT7	Q9XZT7	Taf10b	TRUE	1	0.127096	-0.68758	0.941772	25.3928	0.378631	0.71757	0.788967	-6.97313	0.245589	0.335673
Q9Y091	Q9Y091	fl(2)d	FALSE	0	0.0144249	-0.352311	0.381161	29.9673	0.0954614	0.926955	0.950469	-7.04955	0.295861	0.151107
Q9Y095	Q9Y095	XRCC1	FALSE	0	0.0398409	-0.143563	0.223245	26.0944	0.527217	0.61634	0.710394	-6.89812	0.22113	0.0755683
Q9Y0I1	Q9Y0I1	MRG15	FALSE	0	-0.383018	-0.668871	-0.097165	27.4956	-3.25196	0.0165915	0.0538786	-3.51477	0.0167713	0.117781
Q9Y0Z1	Q9Y0Z1	CG11970	TRUE	4	0.449172	-0.18835	1.08669	24.6248	1.70996	0.13645	0.229559	-5.67622	0.0714567	0.26268
Q9Y105	Q9Y105	GlnRS	FALSE	0	0.061521	-0.190797	0.313839	27.7266	0.591757	0.57491	0.674775	-6.85852	0.210043	0.103963
Q9Y109	Q9Y109	Nulp1	FALSE	0	0.136516	-0.0940408	0.367073	25.2194	1.43706	0.199112	0.304618	-6.02857	0.0948211	0.0949969
Q9Y113	Q9Y113	NELF-B	FALSE	0	0.384316	0.0357112	0.732921	27.9729	2.67562	0.0355475	0.0889313	-4.32081	0.0276824	0.143636
Q9Y134	Q9Y134	Mtr4	FALSE	0	0.363692	0.128284	0.5991	28.0987	3.74957	0.00893188	0.0351366	-2.84941	0.0109373	0.0969958
Q9Y140	Q9Y140	CG7601	FALSE	0	-0.296859	-0.703731	0.110013	25.8862	-1.77077	0.125317	0.216834	-5.59454	0.0674956	0.167644
Q9Y145	Q9Y145	CG7028	FALSE	0	0.306769	0.138543	0.474994	28.2846	4.42577	0.00409003	0.0228447	-2.00298	0.00711105	0.0693142
Q9Y1B2	Q9Y1B2	Orc6	TRUE	2	0.710182	0.0705922	1.34977	24.9848	2.69486	0.0346304	0.0880667	-4.29348	0.0274133	0.263531
R9PY73	R9PY73	wcy	FALSE	0	0.0473815	-0.177927	0.27269	25.6373	0.510388	0.62741	0.719181	-6.90777	0.223866	0.0928342
R9Q794	R9Q794	RpL5	FALSE	0	0.127513	-0.0587676	0.313793	31.2181	1.66133	0.146036	0.242762	-5.74083	0.0755666	0.0767535
T2GGJ9	T2GGJ9	CG6379	TRUE	4	0.196102	-0.346037	0.738242	24.6948	0.877892	0.412675	0.521703	-6.63632	0.162395	0.223379
X2J5G6	X2J5G6	RpL7	FALSE	0	0.202104	-0.00815466	0.412363	31.6807	2.33287	0.0569782	0.122477	-4.80903	0.0381246	0.0866334
X2J6S0	X2J6S0	msl-1	FALSE	0	0.808617	0.597643	1.01959	27.0935	9.30212	7.13671e-05	0.00341813	2.3424	0.00106399	0.0869283
X2J875	X2J875	Bdp1	TRUE	5	0.279223	0.014675	0.543772	24.5781	2.56162	0.0415338	0.0992726	-4.48299	0.0309014	0.109003
X2J8R0	X2J8R0	sip1	FALSE	0	0.184324	-0.0943549	0.463003	26.3468	1.60526	0.157888	0.256351	-5.81442	0.0797967	0.114825
X2J935	X2J935	Nedd8	FALSE	0	0.17502	-0.0575664	0.407606	25.712	1.8263	0.115926	0.204434	-5.51914	0.0636358	0.0958331
X2J950	X2J950	RpS13	FALSE	0	-0.317446	-0.650814	0.0159214	29.0198	-2.31108	0.0587328	0.125297	-4.84004	0.0390022	0.137358
X2J969	X2J969	MED19	FALSE	0	0.763252	0.253931	1.27257	27.1272	3.63701	0.010241	0.0386489	-2.99692	0.0120306	0.209857
X2J9A4	X2J9A4	Trp1	FALSE	0	-0.578913	-0.775107	-0.382719	27.8604	-7.16138	0.00032023	0.00643226	0.757141	0.00200222	0.0808382
X2J9B3	X2J9B3	E2f2	FALSE	0	0.240689	-0.0310662	0.512445	28.2255	2.14955	0.0736126	0.145708	-5.0692	0.0453556	0.111972
X2J9F3	X2J9F3	Nup160	FALSE	0	0.44241	0.0833764	0.801443	30.5304	2.9906	0.0233098	0.0667499	-3.87656	0.0207778	0.147933
X2J9X1	X2J9X1	Hnf4	FALSE	0	0.140526	-0.128305	0.409356	25.4168	1.26866	0.250043	0.359925	-6.23081	0.112037	0.110767
X2JA36	X2JA36	YL-1	FALSE	0	0.0504097	-0.257777	0.358596	27.145	0.396981	0.704667	0.78093	-6.96512	0.243087	0.126983
X2JA43	X2JA43	Ns3	TRUE	4	0.0817913	-0.833342	0.996925	25.1273	0.216916	0.835225	0.882148	-7.02778	0.274594	0.377065
X2JAA8	X2JAA8	wapl	FALSE	0	0.0313907	-0.275437	0.338219	26.3369	0.248299	0.811911	0.864922	-7.01944	0.269232	0.126423
X2JAF1	X2JAF1	lva	FALSE	0	0.05904	-0.342343	0.460423	30.4303	0.35699	0.732918	0.802968	-6.9821	0.249947	0.165383
X2JB48	X2JB48	sesB	FALSE	0	-0.00956675	-0.196352	0.177218	33.6069	-0.124306	0.905	0.932314	-7.0459	0.290209	0.0769614
X2JBC1	X2JBC1	Upf1	FALSE	0	-0.202785	-0.397047	-0.00852234	30.1323	-2.53347	0.0431708	0.10196	-4.52311	0.0317381	0.0800424
X2JC31	X2JC31	Chc	FALSE	0	-0.2706	-0.574037	0.0328374	29.6538	-2.16435	0.0721011	0.143828	-5.04827	0.0447704	0.125026
X2JC35	X2JC35	RpL36	FALSE	0	-0.104377	-0.489742	0.280987	29.0946	-0.65736	0.534542	0.638954	-6.81412	0.198893	0.158783
X2JC79	X2JC79	eIF4H1	FALSE	0	-0.319815	-0.549255	-0.0903739	29.4772	-3.38296	0.0140445	0.0473079	-3.33641	0.0147259	0.094537
X2JCE0	X2JCE0	kz	FALSE	0	-0.0580771	-0.230911	0.114757	29.7936	-0.815538	0.444911	0.549985	-6.69082	0.171198	0.0712132
X2JCP8	X2JCP8	Act5C	FALSE	0	-0.252216	-0.430505	-0.0739267	32.3059	-3.43334	0.0131816	0.0456978	-3.2684	0.0142248	0.0734608
X2JCS6	X2JCS6	RpL7A	FALSE	0	0.179455	-0.0418169	0.400727	30.5867	1.96833	0.0949503	0.176566	-5.32341	0.0549613	0.0911712
X2JCX8	X2JCX8	RpS14a	FALSE	0	0.106537	-0.0727928	0.285866	29.6692	1.44184	0.197815	0.302935	-6.02264	0.0942972	0.0738896
X2JDP6	X2JDP6	Ndf	FALSE	0	0.177312	0.000599475	0.354024	31.2639	2.43523	0.0494336	0.112656	-4.66316	0.0350673	0.0728111
X2JDU0	X2JDU0	RpL9	FALSE	0	-0.265285	-0.540098	0.00952802	29.3576	-2.34285	0.0561924	0.121468	-4.79482	0.0378104	0.113232
X2JE06	X2JE06	RpL24	FALSE	0	0.152979	-0.0272015	0.33316	28.8097	2.0606	0.0834015	0.1586	-5.19448	0.0493687	0.0742402
X2JE29	X2JE29	TH1	FALSE	0	-0.168095	-0.558235	0.222045	25.5341	-1.04569	0.334688	0.443939	-6.47474	0.138189	0.16075
X2JEU3	X2JEU3	CG1737	FALSE	0	0.369444	0.191838	0.547051	29.1411	5.04845	0.00211354	0.015986	-1.28492	0.0049761	0.0731797
X2JEW2	X2JEW2	CG2691	FALSE	0	0.0900845	-0.0689507	0.24912	30.079	1.37476	0.216752	0.324494	-6.10496	0.101008	0.0655276
X2JF59	X2JF59	Jafrac1	FALSE	0	-0.154601	-0.450511	0.141309	28.7257	-1.26801	0.25026	0.359925	-6.23156	0.112037	0.121924
X2JFM3	X2JFM3	mnb	TRUE	1	0.24143	-0.426671	0.909531	25.2149	0.877036	0.413106	0.521808	-6.63709	0.162428	0.275279
X2JFP6	X2JFP6	Rip11	FALSE	0	-0.424141	-0.711427	-0.136855	26.3286	-3.58315	0.0109412	0.0403196	-3.06816	0.0125506	0.118371
X2JFR1	X2JFR1	nonA	FALSE	0	-0.424485	-0.767843	-0.0811274	28.2136	-3.00044	0.0230095	0.0664883	-3.86282	0.0206964	0.141474
X2JFR6	X2JFR6	eIF2alpha	FALSE	0	-0.273308	-0.628878	0.0822621	26.4223	-1.8655	0.109716	0.196644	-5.4655	0.0612109	0.146506
X2JFW6	X2JFW6	CG8289	FALSE	0	-0.20211	-0.379451	-0.0247694	28.5668	-2.76598	0.0314545	0.081691	-4.19267	0.0254287	0.0730701
X2JG50	X2JG50	Elys	FALSE	0	0.270108	-0.0261936	0.566409	30.3454	2.21244	0.0674053	0.138972	-4.98017	0.0432592	0.122086
X2JGB3	X2JGB3	Bre1	FALSE	0	0.911347	0.619538	1.20316	26.3359	7.57973	0.000232375	0.00546178	1.09987	0.00170013	0.120235
X2JGM9	X2JGM9	RpS4	FALSE	0	-0.0575368	-0.248725	0.133651	30.5571	-0.730388	0.491778	0.596189	-6.75996	0.185581	0.0787756
X2JH42	X2JH42	ATPsynbeta	FALSE	0	-0.343876	-0.831818	0.144065	25.9264	-1.71042	0.136362	0.229559	-5.67561	0.0714567	0.201048
X2JIQ5	X2JIQ5	RpL17	FALSE	0	-0.287299	-0.674354	0.0997551	30.2114	-1.80149	0.120033	0.210066	-5.55291	0.0653891	0.159479
X2JJP5	X2JJP5	Sec16	FALSE	0	-0.862532	-1.17407	-0.550995	25.944	-6.71946	0.000457028	0.00715773	0.375031	0.00222805	0.128363
X2JKF2	X2JKF2	CG9213	TRUE	1	0.472874	0.02731	0.918439	24.996	2.57575	0.0407373	0.0979225	-4.46287	0.0304812	0.183587
X2JKU5	X2JKU5	RpS5a	FALSE	0	-0.0818381	-0.431896	0.26822	28.4147	-0.567394	0.590355	0.688523	-6.87396	0.214322	0.144235
X2JLB5	X2JLB5	Rpp20	TRUE	3	-0.361624	-2.05468	1.33143	25.9816	-0.51839	0.622133	0.715071	-6.90322	0.222586	0.697592

## Sheet: H4K16Ac_vs_H3K4me3
name	Uniprot	symbol	imputed	num_NAs	H4K16Ac_vs_H3K4me3.logFC	H4K16Ac_vs_H3K4me3.CI.L	H4K16Ac_vs_H3K4me3.CI.R	H4K16Ac_vs_H3K4me3.AveExpr	H4K16Ac_vs_H3K4me3.t	H4K16Ac_vs_H3K4me3.P.Value	H4K16Ac_vs_H3K4me3.adj.P.Val	H4K16Ac_vs_H3K4me3.B	H4K16Ac_vs_H3K4me3.q.val	H4K16Ac_vs_H3K4me3.SEM
A0A023GQA5	A0A023GQA5	l(2)37Cc	FALSE	0	0.423793	0.165819	0.681767	26.2656	3.987	0.0067361	0.117447	-2.1551	0.0560642	0.106294
A0A0B4JCV4	A0A0B4JCV4	tacc	FALSE	0	0.00526373	-0.238401	0.248928	26.9334	0.0524287	0.959833	0.978304	-6.55146	0.467001	0.100398
A0A0B4JCW4	A0A0B4JCW4	ScsbetaA	FALSE	0	0.020897	-0.178052	0.219846	29.2527	0.254925	0.807014	0.908113	-6.51625	0.433495	0.0819733
A0A0B4JCZ3	A0A0B4JCZ3	pre-mod(mdg4)-W	FALSE	0	0.316631	0.0299603	0.603302	26.7906	2.68064	0.0353056	0.212613	-3.86373	0.101492	0.118118
A0A0B4JD11	A0A0B4JD11	eEF1gamma	FALSE	0	0.119337	-0.0892376	0.327912	32.0361	1.38862	0.212708	0.471457	-5.60041	0.225054	0.0859396
A0A0B4JD24	A0A0B4JD24	CG17002	FALSE	0	-0.0860729	-0.593551	0.421405	26.589	-0.41164	0.694435	0.849224	-6.45793	0.405384	0.209097
A0A0B4JD39	A0A0B4JD39	ttk	FALSE	0	-0.0541193	-0.302796	0.194557	28.6388	-0.528185	0.615707	0.79431	-6.39783	0.37917	0.102463
A0A0B4JD46	A0A0B4JD46	CNBP	FALSE	0	0.151213	-0.309988	0.612414	29.1595	0.795733	0.45552	0.679549	-6.21032	0.324388	0.19003
A0A0B4JDA0	A0A0B4JDA0	mor	FALSE	0	-0.0625699	-0.237744	0.112604	29.7808	-0.866892	0.418233	0.655517	-6.14989	0.312916	0.0721773
A0A0B4JDC3	A0A0B4JDC3	CG6621	FALSE	0	-0.0973422	-0.346993	0.152309	27.3499	-0.946316	0.379339	0.626432	-6.07774	0.299032	0.102864
A0A0B4K618	A0A0B4K618	Fmr1	FALSE	0	0.178997	0.00614586	0.351849	31.4471	2.51329	0.0443856	0.235381	-4.09575	0.112361	0.0712204
A0A0B4K652	A0A0B4K652	RpII15	FALSE	0	0.115452	-0.188987	0.41989	28.2075	0.920386	0.391722	0.638332	-6.10182	0.304713	0.125438
A0A0B4K6J3	A0A0B4K6J3	mld	FALSE	0	-0.223387	-0.690558	0.243784	24.9633	-1.16051	0.288502	0.5498	-5.86096	0.262451	0.192489
A0A0B4K6L4	A0A0B4K6L4	Prat	FALSE	0	-0.0984372	-0.252813	0.0559384	26.6401	-1.54757	0.171034	0.413879	-5.40475	0.197568	0.0636077
A0A0B4K6N1	A0A0B4K6N1	RpS8	FALSE	0	0.156631	-0.0479927	0.361255	30.6369	1.85776	0.110915	0.347419	-4.99944	0.165843	0.0843116
A0A0B4K6U6	A0A0B4K6U6	sqd	FALSE	0	0.336467	0.0502905	0.622643	32.5793	2.8535	0.0279665	0.202235	-3.62587	0.0965383	0.117914
A0A0B4K6W1	A0A0B4K6W1	su(Hw)	FALSE	0	-0.0717642	-0.278842	0.135314	28.093	-0.84109	0.431487	0.663152	-6.17228	0.316561	0.0853229
A0A0B4K6Y4	A0A0B4K6Y4	unk	TRUE	1	0.366554	-0.0408912	0.773999	25.4376	2.18342	0.0702001	0.280456	-4.55408	0.133878	0.167881
A0A0B4K726	A0A0B4K726	Tfb1	FALSE	0	-0.317339	-0.747088	0.11241	25.4957	-1.79216	0.121614	0.361269	-5.08717	0.172455	0.177071
A0A0B4K7G4	A0A0B4K7G4	mod	FALSE	0	0.0141228	-0.181111	0.209357	31.9234	0.175564	0.866222	0.929449	-6.53553	0.44368	0.0804426
A0A0B4K7J2	A0A0B4K7J2	Nup358	FALSE	0	-0.0969207	-0.353043	0.159201	33.2993	-0.918414	0.392676	0.638332	-6.10363	0.304713	0.105531
A0A0B4K7L0	A0A0B4K7L0	rad50	FALSE	0	-0.385879	-0.5682	-0.203558	28.6365	-5.13669	0.00193308	0.075289	-0.868835	0.0359398	0.0751221
A0A0B4K7T7	A0A0B4K7T7	RhoGEF2	FALSE	0	0.720588	0.417668	1.02351	26.3239	5.77335	0.0010455	0.0669122	-0.245753	0.031941	0.124813
A0A0B4K812	A0A0B4K812	Lis-1	TRUE	3	0.162967	-0.335473	0.661407	25.0205	0.793517	0.456718	0.679549	-6.21213	0.324388	0.205373
A0A0B4K849	A0A0B4K849	hts	FALSE	0	0.244503	0.0668706	0.422135	30.2809	3.34065	0.0148171	0.16492	-2.97182	0.078726	0.0731903
A0A0B4K859	A0A0B4K859	Nup188	FALSE	0	-0.200842	-0.677767	0.276082	29.3894	-1.02206	0.344909	0.602708	-6.0046	0.287707	0.196508
A0A0B4K891	A0A0B4K891	CG8963	TRUE	4	0.306395	-0.165181	0.777972	24.9262	1.57688	0.164231	0.407063	-5.36763	0.194315	0.194305
A0A0B4KEE4	A0A0B4KEE4	koi	FALSE	0	-0.0624988	-0.277803	0.152806	31.3953	-0.704511	0.506664	0.708776	-6.28157	0.33834	0.0887124
A0A0B4KEH0	A0A0B4KEH0	14-3-3zeta	FALSE	0	-0.110269	-0.344172	0.123634	26.9878	-1.14416	0.294735	0.554171	-5.87855	0.264538	0.0963756
A0A0B4KEK1	A0A0B4KEK1	E(Pc)	TRUE	2	-0.26686	-0.595323	0.0616029	25.1291	-1.97181	0.0944864	0.322008	-4.84503	0.153713	0.135337
A0A0B4KER0	A0A0B4KER0	row	FALSE	0	0.152622	-0.108602	0.413846	31.0752	1.41799	0.204367	0.461629	-5.56502	0.220362	0.107633
A0A0B4KEW3	A0A0B4KEW3	Zasp52	FALSE	0	0.847904	0.491517	1.20429	25.7366	5.77423	0.00104466	0.0669122	-0.244938	0.031941	0.146843
A0A0B4KEX0	A0A0B4KEX0	clu	FALSE	0	0.158351	-0.25063	0.567331	27.777	0.939693	0.382473	0.627648	-6.08394	0.299613	0.168513
A0A0B4KF46	A0A0B4KF46	Uba1	TRUE	1	0.35451	-0.494243	1.20326	25.6314	1.01371	0.348575	0.605004	-6.01285	0.288803	0.349714
A0A0B4KF79	A0A0B4KF79	CG14657	TRUE	7	-0.259411	-0.820476	0.301655	24.4467	-1.12213	0.303312	0.562258	-5.90199	0.268398	0.231177
A0A0B4KFB8	A0A0B4KFB8	CG42724	FALSE	0	-0.205824	-0.659822	0.248174	27.4496	-1.1003	0.312015	0.569864	-5.92493	0.272029	0.187062
A0A0B4KFE9	A0A0B4KFE9	Mtor	FALSE	0	-0.174094	-0.425018	0.0768311	32.3759	-1.68387	0.141515	0.377007	-5.22984	0.179967	0.103389
A0A0B4KFJ7	A0A0B4KFJ7	Kdm2	TRUE	2	-0.377122	-1.06537	0.311127	25.611	-1.32986	0.230325	0.495049	-5.67004	0.236316	0.283581
A0A0B4KFN0	A0A0B4KFN0	Taf12	TRUE	7	-0.182865	-0.822979	0.457249	24.8578	-0.693333	0.513185	0.716556	-6.28979	0.342054	0.263748
A0A0B4KFV4	A0A0B4KFV4	CG15107	FALSE	0	-0.191709	-0.357228	-0.0261905	27.466	-2.81103	0.0296044	0.205489	-3.6841	0.0980918	0.068199
A0A0B4KFZ9	A0A0B4KFZ9	His4r	FALSE	0	0.047144	-0.149698	0.243986	35.223	0.581268	0.581529	0.771355	-6.36594	0.368212	0.0811053
A0A0B4KG58	A0A0B4KG58	Patronin	FALSE	0	0.310415	0.0637465	0.557084	29.2723	3.0542	0.0214398	0.183975	-3.35306	0.087822	0.101635
A0A0B4KG83	A0A0B4KG83	Arp5	FALSE	0	-0.0104674	-0.249473	0.228538	25.4558	-0.106291	0.918702	0.949473	-6.5466	0.453238	0.0984781
A0A0B4KG97	A0A0B4KG97	fru	FALSE	0	0.126279	-0.123077	0.375636	26.2237	1.22908	0.263569	0.519695	-5.78551	0.24808	0.102743
A0A0B4KGD7	A0A0B4KGD7	cic	TRUE	3	-0.0424237	-0.67445	0.589603	24.8194	-0.162908	0.875764	0.932228	-6.53796	0.445006	0.260415
A0A0B4KGP8	A0A0B4KGP8	eIF2gamma	FALSE	0	-0.240729	-0.500452	0.0189943	28.5097	-2.2495	0.0640019	0.271566	-4.46248	0.129634	0.107014
A0A0B4KH12	A0A0B4KH12	bon	FALSE	0	-0.330577	-0.627598	-0.0335559	27.3105	-2.70118	0.0343348	0.2118	-3.83535	0.101105	0.122382
A0A0B4KH25	A0A0B4KH25	His2Av	FALSE	0	0.092293	-0.338901	0.523487	36.0809	0.519475	0.62142	0.798289	-6.4028	0.38107	0.177666
A0A0B4KH34	A0A0B4KH34	AnxB9	FALSE	0	0.279419	0.0684019	0.490436	26.5148	3.21371	0.0174272	0.17322	-3.13946	0.0826881	0.0869458
A0A0B4KH51	A0A0B4KH51	Abi	FALSE	0	0.59896	0.156356	1.04156	27.4849	3.28436	0.0159177	0.171514	-3.04589	0.0818733	0.182367
A0A0B4KHD9	A0A0B4KHD9	CG5746	FALSE	0	0.854703	0.452542	1.25686	28.0513	5.15803	0.00189209	0.075289	-0.846958	0.0359398	0.165703
A0A0B4KHE1	A0A0B4KHE1	CG15514	FALSE	0	0.000410172	-0.377484	0.378305	25.7249	0.0026343	0.997981	0.997981	-6.55302	0.476394	0.155705
A0A0B4KHF2	A0A0B4KHF2	tmod	TRUE	4	0.08616	-0.111491	0.283811	24.842	1.05797	0.329476	0.588459	-5.96853	0.280905	0.0814388
A0A0B4KHH6	A0A0B4KHH6	dgt1	FALSE	0	-0.206794	-0.408178	-0.00540908	28.4336	-2.49218	0.0456948	0.24002	-4.12508	0.114576	0.0829769
A0A0B4KHI4	A0A0B4KHI4	Syp	TRUE	1	0.627147	-0.0235106	1.2778	25.89	2.3393	0.0564706	0.258922	-4.33772	0.123598	0.268092
A0A0B4KHL2	A0A0B4KHL2	gammaCOP	FALSE	0	-0.110617	-0.412115	0.19088	26.9644	-0.890447	0.406399	0.648215	-6.129	0.30943	0.124227
A0A0B4KHR8	A0A0B4KHR8	mask	FALSE	0	0.199321	-0.0328721	0.431514	26.8074	2.0834	0.0807726	0.300202	-4.69217	0.143304	0.095671
A0A0B4KHS9	A0A0B4KHS9	Pp1alpha-96A	TRUE	1	-0.153834	-0.575308	0.267639	25.1874	-0.885832	0.408698	0.648215	-6.13312	0.30943	0.173661
A0A0B4KHX3	A0A0B4KHX3	dco	FALSE	0	-0.130584	-0.29493	0.0337624	28.3516	-1.9284	0.100433	0.327096	-4.90405	0.156142	0.0677159
A0A0B4KI24	A0A0B4KI24	Nlp	FALSE	0	0.136212	-0.15208	0.424504	26.4795	1.14671	0.293758	0.554171	-5.87582	0.264538	0.118786
A0A0B4KI32	A0A0B4KI32	cindr	TRUE	1	-0.478481	-1.16902	0.212061	25.2393	-1.68168	0.141948	0.377007	-5.2327	0.179967	0.284526
A0A0B4KI43	A0A0B4KI43	woc	FALSE	0	-0.0767692	-0.234575	0.0810372	29.1186	-1.18068	0.280969	0.540136	-5.83905	0.257838	0.0650213
A0A0B4LEK8	A0A0B4LEK8	Sec24AB	TRUE	5	0.0568501	-0.956103	1.0698	24.6813	0.13621	0.895964	0.940028	-6.54248	0.448729	0.417369
A0A0B4LEV3	A0A0B4LEV3	CG8635	FALSE	0	0.148875	-0.185031	0.48278	26.392	1.0821	0.319429	0.579529	-5.94382	0.276642	0.13758
A0A0B4LEV8	A0A0B4LEV8	coil	FALSE	0	-0.144137	-0.382068	0.0937953	28.4027	-1.47025	0.190261	0.44392	-5.50117	0.211909	0.0980356
A0A0B4LEY9	A0A0B4LEY9	Non1	FALSE	0	-0.0131474	-0.198506	0.172211	30.8698	-0.172146	0.868797	0.929449	-6.5362	0.44368	0.0763735
A0A0B4LF25	A0A0B4LF25	Prosap	TRUE	3	0.373762	-0.204129	0.951653	25.0728	1.56971	0.165872	0.408217	-5.37674	0.194866	0.23811
A0A0B4LF26	A0A0B4LF26	eIF3j	FALSE	0	0.358484	-0.170228	0.887195	25.7714	1.64558	0.149277	0.387312	-5.27955	0.184887	0.217846
A0A0B4LF82	A0A0B4LF82	Sin3A	FALSE	0	-0.0646799	-0.219232	0.0898721	30.2771	-1.0157	0.347701	0.605004	-6.0109	0.288803	0.0636804
A0A0B4LFB3	A0A0B4LFB3	eIF3m	TRUE	1	-1.01259	-2.67018	0.644992	23.9993	-1.48261	0.187057	0.439999	-5.4859	0.210037	0.682979
A0A0B4LFB8	A0A0B4LFB8	Opa1	FALSE	0	0.0211012	-0.144772	0.186975	28.1648	0.308744	0.767613	0.889181	-6.49921	0.424457	0.0683453
A0A0B4LFD2	A0A0B4LFD2	Hsc70-5	FALSE	0	0.208051	-0.177475	0.593576	25.9704	1.30974	0.23665	0.497908	-5.6935	0.23768	0.158849
A0A0B4LFD9	A0A0B4LFD9	RpS23	FALSE	0	0.251529	0.0860153	0.417042	28.7452	3.68827	0.00962023	0.137733	-2.52453	0.065748	0.0681969
A0A0B4LFK8	A0A0B4LFK8	Dcr-2	TRUE	5	-0.0796499	-1.13187	0.972575	24.2034	-0.183715	0.860089	0.929449	-6.53387	0.44368	0.433551
A0A0B4LFL2	A0A0B4LFL2	eIF3c	FALSE	0	-0.0147386	-0.317456	0.287979	27.9481	-0.118165	0.909667	0.944725	-6.54509	0.450972	0.124729
A0A0B4LFL3	A0A0B4LFL3	eEF1beta	FALSE	0	0.0286387	-0.140128	0.197405	30.8673	0.411848	0.694291	0.849224	-6.45784	0.405384	0.0695372
A0A0B4LFW6	A0A0B4LFW6	Rme-8	FALSE	0	-0.319377	-1.63909	1.00034	25.4075	-0.587345	0.577689	0.768917	-6.36211	0.367048	0.543764
A0A0B4LFY2	A0A0B4LFY2	CG11007	TRUE	1	0.0929949	-0.155716	0.341705	24.7301	0.907473	0.398002	0.643082	-6.11363	0.30698	0.102477
A0A0B4LG52	A0A0B4LG52	RpS16	FALSE	0	0.326109	0.114098	0.53812	30.5674	3.73313	0.00911092	0.137733	-2.46814	0.065748	0.0873554
A0A0B4LGC6	A0A0B4LGC6	l(2)k09913	FALSE	0	0.157017	-0.0315668	0.345601	25.5693	2.02074	0.0882056	0.308619	-4.77819	0.147322	0.0777026
A0A0B4LGG6	A0A0B4LGG6	Lpt	FALSE	0	0.0172247	-0.155986	0.190435	25.4342	0.241349	0.817057	0.91074	-6.52004	0.434749	0.0713683
A0A0B4LGH1	A0A0B4LGH1	betaTub60D	FALSE	0	0.185167	-0.00127988	0.371614	27.5072	2.41033	0.051167	0.247185	-4.23891	0.117996	0.0768222
A0A0B4LGR2	A0A0B4LGR2	ctrip	FALSE	0	0.0356053	-0.271787	0.342997	25.3544	0.281119	0.787752	0.895623	-6.50835	0.427533	0.126655
A0A0B4LGT9	A0A0B4LGT9	CG9667	TRUE	1	-0.5476	-1.09418	-0.0010176	25.4088	-2.43151	0.0496883	0.245608	-4.20945	0.117243	0.225209
A0A0B4LGV1	A0A0B4LGV1	EMC1	FALSE	0	0.0526504	-0.102271	0.207571	27.1568	0.824822	0.439999	0.666508	-6.18612	0.318163	0.0638325
A0A0B4LGV6	A0A0B4LGV6	Ibf1	FALSE	0	-0.031146	-0.270596	0.208304	30.0565	-0.315686	0.762582	0.888544	-6.49678	0.424153	0.0986613
A0A0B4LGW1	A0A0B4LGW1	sub	FALSE	0	0.204934	-0.082995	0.492864	25.8758	1.72742	0.133159	0.372554	-5.17282	0.177842	0.118636
A0A0B4LGZ0	A0A0B4LGZ0	Unc-115a	FALSE	0	0.317203	0.0691075	0.565298	27.3853	3.10304	0.0201141	0.178589	-3.28733	0.0852507	0.102223
A0A0B4LGZ5	A0A0B4LGZ5	RpL11	FALSE	0	-0.128694	-0.376597	0.119209	29.3393	-1.25993	0.252975	0.509933	-5.75073	0.243421	0.102144
A0A0B4LH50	A0A0B4LH50	Act87E	FALSE	0	0.169314	-0.0792837	0.417912	28.8173	1.65297	0.147748	0.385953	-5.26999	0.184238	0.10243
A0A0B4LHC1	A0A0B4LHC1	RhoGAP92B	FALSE	0	0.141292	-0.0911559	0.37374	27.5629	1.47523	0.188963	0.44245	-5.49502	0.211207	0.0957761
A0A0B4LHE5	A0A0B4LHE5	pre-mod(mdg4)-P	TRUE	5	-0.286913	-0.637574	0.0637486	24.6103	-1.98578	0.0926495	0.317655	-4.82599	0.151635	0.144484
A0A0B4LHE8	A0A0B4LHE8	pre-mod(mdg4)-B	TRUE	3	0.260128	-0.086332	0.606588	24.8773	1.82223	0.11659	0.356988	-5.04707	0.170411	0.142753
A0A0B4LHF7	A0A0B4LHF7	pit	FALSE	0	-0.0137286	-0.221135	0.193678	30.999	-0.160647	0.87747	0.932228	-6.53837	0.445006	0.0854581
A0A0B4LHH1	A0A0B4LHH1	Gpat4	TRUE	6	-0.339913	-0.700811	0.0209847	24.4359	-2.28587	0.0608333	0.264702	-4.41197	0.126358	0.148702
A0A0B4LHR3	A0A0B4LHR3	XNP	FALSE	0	0.00340797	-0.201976	0.208792	28.3715	0.0402715	0.96914	0.983873	-6.5521	0.469659	0.0846247
A0A0B4LHU8	A0A0B4LHU8	kay	TRUE	1	-0.172195	-1.3405	0.996109	26.2008	-0.357712	0.732404	0.873222	-6.48098	0.416839	0.481379
A0A0B4LI25	A0A0B4LI25	ncd	FALSE	0	-0.0259663	-0.342491	0.290558	31.1102	-0.1991	0.848544	0.924863	-6.53054	0.441491	0.130418
A0A0B4LI86	A0A0B4LI86	RpII140	FALSE	0	-0.0646312	-0.273603	0.144341	31.8709	-0.750625	0.480344	0.689554	-6.24645	0.329164	0.0861033
A0A0B4LIF3	A0A0B4LIF3	Nelf-A	FALSE	0	0.0866133	-0.0923914	0.265618	26.9795	1.17433	0.283323	0.542736	-5.84598	0.259079	0.0737557
A0A0B4LIF8	A0A0B4LIF8	pre-mod(mdg4)-J	FALSE	0	0.17451	-0.170701	0.519722	25.525	1.22689	0.264338	0.519892	-5.78797	0.248175	0.142238
A0A0B4LIJ0	A0A0B4LIJ0	Rpt2	FALSE	0	0.301908	0.0717808	0.532034	25.9938	3.18402	0.0181075	0.174469	-3.17898	0.0832843	0.0948196
A0A0C4DHA1	A0A0C4DHA1	Cdep	TRUE	5	-0.116457	-0.426176	0.193261	24.7826	-0.912574	0.395512	0.640837	-6.10898	0.305909	0.127614
A0A0C4DHE8	A0A0C4DHE8	RpS29	FALSE	0	0.273054	0.00335494	0.542753	26.8051	2.45719	0.0479556	0.243196	-4.17374	0.116091	0.111125
A0A0C4DHG4	A0A0C4DHG4	CG10265	FALSE	0	-0.135879	-0.483186	0.211428	26.0568	-0.949528	0.377827	0.626432	-6.07472	0.299032	0.143102
A0A0C4DHG5	A0A0C4DHG5	B52	FALSE	0	-0.10666	-0.32314	0.109821	31.4222	-1.19578	0.275438	0.531499	-5.82249	0.253715	0.089197
A0A0S0WNN6	A0A0S0WNN6	emb	TRUE	1	0.0331929	-0.289404	0.35579	24.5056	0.24972	0.81086	0.90911	-6.51772	0.433971	0.13292
A0A126GUM1	A0A126GUM1	psq	FALSE	0	0.200119	-0.198685	0.598923	26.2908	1.21786	0.267518	0.522742	-5.79804	0.249535	0.16432
A0A126GUM8	A0A126GUM8	lig	FALSE	0	0.544644	0.285364	0.803924	31.6888	5.09815	0.00200967	0.075289	-0.908516	0.0359398	0.106832
A0A126GUS7	A0A126GUS7	Fmr1	TRUE	5	0.258466	-0.556002	1.07293	24.8928	0.770191	0.469464	0.68765	-6.23099	0.328255	0.335587
A0A126GUT1	A0A126GUT1	Tctp	TRUE	6	0.607323	-0.545345	1.75999	24.821	1.27875	0.246694	0.507258	-5.72925	0.242143	0.474936
A0A126GUU7	A0A126GUU7	Bin1	FALSE	0	0.0453766	-0.310283	0.401036	29.9554	0.309647	0.766958	0.889092	-6.4989	0.424415	0.146543
A0A126GUW2	A0A126GUW2	l(3)07882	FALSE	0	-0.0918858	-0.281966	0.0981945	29.8842	-1.17322	0.283735	0.542736	-5.84718	0.259079	0.0783192
A0A126GUY7	A0A126GUY7	pre-mod(mdg4)-N	TRUE	1	-0.0181651	-1.21198	1.17565	26.3503	-0.0369291	0.9717	0.985169	-6.55225	0.470278	0.491891
A0A126GUZ1	A0A126GUZ1	pre-mod(mdg4)-V	FALSE	0	0.292621	0.0781589	0.507082	27.9	3.31149	0.0153764	0.169915	-3.01013	0.0811103	0.0883651
A0A126GV10	A0A126GV10	spas	TRUE	7	-0.186712	-0.464075	0.0906518	24.4367	-1.63377	0.151752	0.390437	-5.29479	0.186378	0.114283
A0A126GV30	A0A126GV30	Apc	TRUE	6	-0.158076	-0.870096	0.553944	24.5368	-0.53882	0.608771	0.790424	-6.39166	0.377315	0.293375
A0A1Z1CGZ3	A0A1Z1CGZ3	CG5316	TRUE	6	0.0681446	-0.293062	0.429351	24.7157	0.457872	0.66263	0.828152	-6.43575	0.395325	0.148829
A0A4D6K557	A0A4D6K557		FALSE	0	-0.267934	-0.706259	0.170391	27.8103	-1.48354	0.186818	0.439999	-5.48475	0.210037	0.180604
A1A708	A1A708	CG4951	TRUE	1	-0.0804676	-1.37029	1.20936	25.9737	-0.151412	0.884451	0.936336	-6.54001	0.446967	0.53145
A1YK02	A1YK02	Nup75	FALSE	0	-0.137178	-0.449566	0.175209	30.1136	-1.06576	0.326203	0.586468	-5.96059	0.279955	0.128714
A1Z6E6	A1Z6E6	d4	FALSE	0	0.147494	-0.199448	0.494436	25.8077	1.03178	0.340675	0.600831	-5.99492	0.286811	0.142951
A1Z6H7	A1Z6H7	Gp210	FALSE	0	-0.157554	-0.404623	0.0895142	33.0567	-1.54768	0.171006	0.413879	-5.4046	0.197568	0.1018
A1Z6M0	A1Z6M0	Bap170	FALSE	0	-0.0644566	-0.250556	0.121643	28.2344	-0.840603	0.43174	0.663152	-6.17269	0.316561	0.076679
A1Z6Q0	A1Z6Q0	koi	FALSE	0	0.0202678	-0.205025	0.24556	29.9651	0.218338	0.834165	0.916507	-6.52601	0.437502	0.0928277
A1Z6Z3	A1Z6Z3	Aldh-III	FALSE	0	0.0385831	-0.213801	0.290967	27.8067	0.371026	0.722948	0.868827	-6.47557	0.414741	0.10399
A1Z729	A1Z729	CG2064	TRUE	2	0.771942	0.0197588	1.52413	25.1554	2.49075	0.0457852	0.24002	-4.12707	0.114576	0.309924
A1Z768	A1Z768	rnh1	TRUE	4	-0.487344	-0.934558	-0.040131	24.2756	-2.64478	0.0370708	0.217331	-3.91333	0.103745	0.184266
A1Z784	A1Z784	ACC	FALSE	0	0.0739664	-0.285167	0.4331	29.8265	0.499858	0.634391	0.807311	-6.41371	0.385376	0.147975
A1Z7H3	A1Z7H3	Acsl	FALSE	0	-0.0172747	-0.246765	0.212216	27.0426	-0.18269	0.86086	0.929449	-6.53409	0.44368	0.0945574
A1Z7J7	A1Z7J7	Sec31	TRUE	2	0.103944	-0.349775	0.557663	25.1402	0.556008	0.597655	0.782808	-6.38146	0.373679	0.186947
A1Z7K2	A1Z7K2	CG30349	FALSE	0	-0.124759	-0.303147	0.0536287	29.8268	-1.69737	0.138872	0.374224	-5.21222	0.178639	0.0735016
A1Z7K8	A1Z7K8	AIMP1	FALSE	0	0.16733	-0.00769888	0.34236	27.501	2.32024	0.0579885	0.26044	-4.36421	0.124323	0.0721177
A1Z7L1	A1Z7L1	FANCI	TRUE	3	-0.0730814	-0.3898	0.243638	24.5345	-0.560017	0.595078	0.781899	-6.37904	0.373245	0.130498
A1Z7P7	A1Z7P7	Su(var)2-10	FALSE	0	-0.0747561	-0.244784	0.0952721	28.4916	-1.06707	0.325655	0.586468	-5.95925	0.279955	0.0700571
A1Z818	A1Z818	tea	TRUE	3	0.384719	-0.251015	1.02045	24.8553	1.46871	0.190663	0.44392	-5.50306	0.211909	0.261943
A1Z830	A1Z830	CG12128	FALSE	0	0.0533778	-0.148501	0.255256	27.9628	0.641711	0.544007	0.739085	-6.32632	0.352808	0.0831805
A1Z898	A1Z898	Caf1-105	TRUE	1	0.686746	-0.127418	1.50091	25.8456	2.04717	0.0849901	0.3043	-4.74197	0.14526	0.335462
A1Z8D0	A1Z8D0	nclb	TRUE	3	-0.0842809	-0.501668	0.333106	24.8065	-0.490071	0.640916	0.807919	-6.41901	0.385666	0.171977
A1Z8D5	A1Z8D5	CG18004	FALSE	0	0.130123	-0.1191	0.379346	27.4488	1.26717	0.250541	0.507873	-5.74249	0.242437	0.102688
A1Z8J0	A1Z8J0	CG7741	TRUE	4	-0.237041	-0.513339	0.0392577	24.4784	-2.08216	0.0809138	0.300202	-4.69388	0.143304	0.113844
A1Z8M2	A1Z8M2	tou	FALSE	0	-0.205454	-0.393354	-0.0175542	27.2495	-2.65373	0.0366217	0.21635	-3.90095	0.103276	0.0774208
A1Z8R2	A1Z8R2	ADD1	FALSE	0	-0.0621213	-0.238922	0.11468	25.0862	-0.852756	0.425457	0.66077	-6.16222	0.315424	0.0728477
A1Z8S6	A1Z8S6	pds5	FALSE	0	-0.12064	-0.346768	0.105488	26.3898	-1.29481	0.241442	0.50079	-5.71078	0.239056	0.0931721
A1Z8U0	A1Z8U0	Prp8	FALSE	0	-0.155762	-0.320264	0.00873908	31.8596	-2.29806	0.0598084	0.263819	-4.39504	0.125936	0.0677799
A1Z909	A1Z909	CG8545	FALSE	0	-0.00964929	-0.183621	0.164322	30.73	-0.134613	0.897176	0.940235	-6.54273	0.448829	0.0716819
A1Z934	A1Z934	CG8778	TRUE	1	0.294909	-0.128523	0.71834	25.3765	1.69033	0.140243	0.375941	-5.22141	0.179458	0.174468
A1Z968	A1Z968	NAT1	FALSE	0	0.643742	0.348109	0.939375	27.616	5.28479	0.00166798	0.075289	-0.718478	0.0359398	0.12181
A1Z987	A1Z987	Cap-G	FALSE	0	-0.0906609	-0.260657	0.0793349	27.6787	-1.29435	0.241592	0.50079	-5.71132	0.239056	0.0700438
A1Z9E2	A1Z9E2	mip120	FALSE	0	-0.145018	-0.315234	0.0251975	28.9002	-2.06772	0.082571	0.301622	-4.71374	0.143982	0.0701344
A1Z9E3	A1Z9E3	mEFTu1	FALSE	0	0.115407	-0.258797	0.489611	27.5046	0.7485	0.481536	0.690379	-6.24811	0.329558	0.154184
A1Z9G2	A1Z9G2	fand	FALSE	0	-0.489044	-0.864876	-0.113212	27.1103	-3.15808	0.0187255	0.174469	-3.2136	0.0832843	0.154855
A1Z9I5	A1Z9I5	tum	FALSE	0	-0.0253485	-0.306601	0.255904	30.261	-0.218738	0.833866	0.916507	-6.52591	0.437502	0.115885
A1Z9J1	A1Z9J1	shot	TRUE	5	-0.0101685	-0.882814	0.862477	24.6854	-0.0282805	0.978325	0.986589	-6.55257	0.470956	0.359558
A1Z9J3	A1Z9J3	shot	FALSE	0	-0.0859146	-0.582079	0.41025	29.0871	-0.420252	0.688456	0.846652	-6.45397	0.404156	0.204436
A1Z9L3	A1Z9L3	pea	FALSE	0	-0.0339976	-0.500148	0.432153	26.9777	-0.177007	0.865136	0.929449	-6.53524	0.44368	0.192069
A1Z9S6	A1Z9S6	Su(var)2-HP2	FALSE	0	-0.279514	-0.472431	-0.0865966	29.5688	-3.51642	0.0118827	0.150842	-2.7434	0.0720056	0.0794881
A1Z9S8	A1Z9S8	CG12863	FALSE	0	-0.109013	-0.449814	0.231787	25.9347	-0.776333	0.466084	0.68765	-6.22607	0.328255	0.140421
A1ZA22	A1ZA22	eIF2Bgamma	FALSE	0	0.221201	0.013626	0.428776	24.7087	2.58631	0.0401525	0.22427	-3.99436	0.107057	0.0855277
A1ZA92	A1ZA92	CG8414	FALSE	0	-0.156745	-0.318827	0.00533734	30.0907	-2.34707	0.0558632	0.257675	-4.3269	0.123003	0.066783
A1ZAK1	A1ZAK1	IntS8	TRUE	2	-1.20038	-1.82591	-0.574858	25.8466	-4.6574	0.00317911	0.0904749	-1.37901	0.0431889	0.257737
A1ZAK9	A1ZAK9	Psi	TRUE	3	1.10589	0.713047	1.49874	25.4657	6.83221	0.000416655	0.0492294	0.665898	0.0235001	0.161864
A1ZAV3	A1ZAV3	MESR4	FALSE	0	-0.13196	-0.388927	0.125006	28.2311	-1.24634	0.257596	0.514522	-5.76612	0.245611	0.105879
A1ZBB4	A1ZBB4	CG30122	FALSE	0	0.141472	-0.0379644	0.320908	28.7067	1.9135	0.102559	0.329842	-4.92425	0.157453	0.0739335
A1ZBE9	A1ZBE9	MetRS	FALSE	0	-0.0416047	-0.25735	0.17414	29.9901	-0.468026	0.655742	0.82155	-6.43059	0.392173	0.0888938
A1ZBJ2	A1ZBJ2	CG7461	FALSE	0	-0.0761566	-0.347296	0.194982	25.2344	-0.681686	0.520038	0.720269	-6.29825	0.343826	0.111718
A1ZBT5	A1ZBT5	MED8	TRUE	7	-0.127429	-0.586443	0.331584	24.6378	-0.673772	0.524729	0.723633	-6.30392	0.345432	0.189128
A1ZBW1	A1ZBW1	HnRNP-K	FALSE	0	0.110264	-0.128094	0.348622	28.1699	1.12272	0.303078	0.562258	-5.90136	0.268398	0.0982113
A1ZBW6	A1ZBW6	CG11180	FALSE	0	-0.27796	-0.450966	-0.104955	27.832	-3.89936	0.00746796	0.123342	-2.262	0.0588782	0.0712837
A4V2B8	A4V2B8	CkIIalpha	FALSE	0	-0.144158	-0.347393	0.0590774	30.2101	-1.7215	0.134265	0.373337	-5.18059	0.178215	0.0837396
A4V2K7	A4V2K7	D1	FALSE	0	0.174586	-0.243412	0.592585	32.1864	1.01369	0.348586	0.605004	-6.01288	0.288803	0.172229
A4V2S3	A4V2S3	CtBP	FALSE	0	-0.0204437	-0.221942	0.181055	28.3353	-0.246239	0.813436	0.910448	-6.5187	0.434609	0.0830238
A4V303	A4V303	CCT3	FALSE	0	0.181374	-0.167769	0.530516	26.0744	1.26078	0.252685	0.509933	-5.74975	0.243421	0.143858
A4V391	A4V391	CCT1	FALSE	0	0.104455	-0.196303	0.405214	26.6598	0.842909	0.430543	0.663152	-6.17072	0.316561	0.123922
A4V3G8	A4V3G8	ball	FALSE	0	0.0668162	-0.175754	0.309386	29.5549	0.668519	0.527857	0.726513	-6.30766	0.346807	0.0999466
A4V3J6	A4V3J6	Hrb98DE	FALSE	0	0.419813	0.0925978	0.747028	32.8934	3.1138	0.019834	0.178589	-3.27288	0.0852507	0.134823
A4V4A1	A4V4A1	Klp10A	FALSE	0	-0.201593	-0.456169	0.0529825	28.3481	-1.92189	0.101357	0.329143	-4.91289	0.157119	0.104893
A4V4A5	A4V4A5	Ran	FALSE	0	-0.0545905	-0.20946	0.100279	29.1738	-0.855498	0.424049	0.659907	-6.15984	0.315012	0.0638114
A4V4I8	A4V4I8	shi	FALSE	0	0.00225286	-0.192827	0.197332	26.7745	0.0280279	0.978519	0.986589	-6.55258	0.470956	0.080379
A8DYB0	A8DYB0	CG13185	FALSE	0	-1.49194	-3.37017	0.3863	25.9758	-1.92783	0.100514	0.327096	-4.90483	0.156142	0.773894
A8DYD2	A8DYD2	cg	FALSE	0	-0.113456	-0.329432	0.10252	29.2276	-1.27494	0.247953	0.507873	-5.73361	0.242437	0.0889891
A8DYI6	A8DYI6	Phb2	FALSE	0	0.588133	0.172683	1.00358	29.8719	3.43578	0.0131412	0.155885	-2.84764	0.0744129	0.171179
A8DYK5	A8DYK5	CG4266	FALSE	0	-0.179312	-0.38109	0.0224662	26.8861	-2.15677	0.0728711	0.284809	-4.59095	0.135956	0.0831391
A8DYV8	A8DYV8	CG34179	TRUE	4	0.0644886	-0.794221	0.923198	24.7531	0.182266	0.861179	0.929449	-6.53417	0.44368	0.353816
A8JNL9	A8JNL9	CG10274	TRUE	4	0.209656	-0.368399	0.787711	25.0434	0.880253	0.41149	0.649587	-6.13809	0.310085	0.238177
A8JUV0	A8JUV0	sno	FALSE	0	0.0238305	-0.212728	0.260389	25.5708	0.244492	0.814729	0.910448	-6.51918	0.434609	0.0974696
A8JUY3	A8JUY3	RpIIIC160	TRUE	2	0.101319	-1.13749	1.34013	26.1837	0.198498	0.848995	0.924863	-6.53068	0.441491	0.510431
A8Y560	A8Y560	RpL15	FALSE	0	0.145641	-0.0551991	0.346482	31.9794	1.75996	0.127229	0.363828	-5.12989	0.173676	0.0827528
B7YZQ1	B7YZQ1	Slik	FALSE	0	0.233307	-0.21048	0.677095	28.0537	1.27592	0.24763	0.507873	-5.7325	0.242437	0.182855
B7YZQ7	B7YZQ7	Nurf-38	FALSE	0	0.113111	-0.074648	0.30087	26.6	1.46209	0.192403	0.446765	-5.51122	0.213267	0.0773629
B7Z0D7	B7Z0D7	CG7504	FALSE	0	-0.155841	-0.416576	0.104895	26.5483	-1.45061	0.195455	0.450103	-5.5253	0.21486	0.107431
B7Z0G1	B7Z0G1	hay	FALSE	0	-0.0451285	-0.354929	0.264672	26.2385	-0.353538	0.735379	0.873222	-6.48263	0.416839	0.127648
B7Z0I8	B7Z0I8	CG42232	FALSE	0	-0.128404	-0.367283	0.110474	32.4988	-1.30458	0.238296	0.497908	-5.69948	0.23768	0.0984257
B7Z0R6	B7Z0R6	Doa	FALSE	0	-0.0251701	-0.184481	0.13414	29.6704	-0.383451	0.714171	0.861125	-6.47036	0.411065	0.0656411
B7Z0V1	B7Z0V1	Taf7	FALSE	0	0.00421994	-0.264905	0.273345	26.6011	0.0380558	0.970837	0.984945	-6.5522	0.470171	0.110888
B7Z120	B7Z120	Tlk	FALSE	0	0.19311	-0.0176048	0.403824	28.4746	2.22422	0.0663037	0.273685	-4.49755	0.130646	0.0868212
C0HL67	C0HL67		FALSE	0	3.05527	2.12624	3.9843	30.9516	7.98155	0.0001731	0.031249	1.50467	0.014917	0.382791
C7LA75	C7LA75	Hsc70-4	FALSE	0	-0.184534	-0.348599	-0.0204693	32.7396	-2.72979	0.0330297	0.208781	-3.79587	0.099663	0.0676
C9QP42	C9QP42	eIF4A	FALSE	0	0.0948975	-0.125762	0.315557	27.7042	1.04376	0.335514	0.596023	-5.9829	0.284516	0.0909187
[truncated: 1,337 more rows]
