# Supplementary material for: The role of RNA in the maintenance of chromatin domains as revealed by antibody-mediated proximity labelling coupled to mass spectrometry
Source: eLife. 2024 May 8;13:e95718. doi: 10.7554/eLife.95718 (PMC11147508; doi:10.7554/eLife.95718)
Supplement: Supplementary file 8. [file elife-95718-supp8.xlsx]

## Sheet: H4K16Ac_H4K16Ac_vs_H3K9me3
ID	Description	GeneRatio	BgRatio	pvalue	p.adjust	qvalue	geneID	Count
GO:0022613	ribonucleoprotein complex biogenesis	27/199	413/18885	3.49759e-14	3.16532e-11	2.90484e-11	Non1/pit/Prp8/CG13096/Nop60B/crn/CG12325/AGO1/CG32344/l(2)34Fd/CG7637/RpL6/CG12499/Non3/CG9799/CG6686/CG13097/eIF3a/SmD1/l(3)72Ab/CG7564/CG5589/CG16753/CG9004/CG2260/RpL7A/RpS14a	27
GO:0034470	ncRNA processing	24/199	355/18885	4.99043e-13	2.25817e-10	2.07234e-10	pit/Cbp80/CG13096/Nop60B/CG12325/AGO1/IntS3/CG32344/l(2)34Fd/CG7637/CG12499/Non3/CG9799/CG10463/CG6686/CG13097/defl/CG5589/IntS2/CG16753/IntS4/CG2260/RpL7A/RpS14a	24
GO:0016072	rRNA metabolic process	18/199	212/18885	1.10389e-11	3.21145e-09	2.94718e-09	pit/CG13096/Nop60B/CG12325/CG32344/l(2)34Fd/CG7637/CG12499/Non3/CG9799/TAF1B/CG6686/CG13097/CG5589/CG16753/CG2260/RpL7A/RpS14a	18
GO:0006364	rRNA processing	17/199	187/18885	1.41943e-11	3.21145e-09	2.94718e-09	pit/CG13096/Nop60B/CG12325/CG32344/l(2)34Fd/CG7637/CG12499/Non3/CG9799/CG6686/CG13097/CG5589/CG16753/CG2260/RpL7A/RpS14a	17
GO:0034660	ncRNA metabolic process	26/199	500/18885	1.96977e-11	3.30424e-09	3.03233e-09	pit/RpIIIC160/Cbp80/CG13096/Nop60B/CG12325/AGO1/IntS3/CG32344/l(2)34Fd/CG7637/CG12499/Non3/CG9799/TAF1B/CG10463/CG6686/CG13097/defl/CG5589/IntS2/CG16753/IntS4/CG2260/RpL7A/RpS14a	26
GO:0042254	ribosome biogenesis	20/199	283/18885	2.19066e-11	3.30424e-09	3.03233e-09	Non1/pit/CG13096/Nop60B/CG12325/CG32344/l(2)34Fd/CG7637/RpL6/CG12499/Non3/CG9799/CG6686/CG13097/CG5589/CG16753/CG9004/CG2260/RpL7A/RpS14a	20
GO:0000070	mitotic sister chromatid segregation	15/199	218/18885	1.10759e-08	1.41912e-06	1.30234e-06	spas/pds5/Cap-G/Dhc64C/Rbf/SMC2/Mad1/Cap-D2/SMC1/Mau2/SA/Cdc27/Klp67A/SMC3/Eb1	15
GO:0140014	mitotic nuclear division	17/199	290/18885	1.25447e-08	1.41912e-06	1.30234e-06	spas/pds5/Cap-G/Dhc64C/Klp61F/Rbf/SMC2/Mad1/Cap-D2/SMC1/Mau2/SA/Cdc27/Klp67A/SMC3/Klp3A/Eb1	17
GO:0098813	nuclear chromosome segregation	17/199	313/18885	3.85143e-08	3.87283e-06	3.55413e-06	spas/pds5/Cap-G/Dhc64C/Rbf/SMC2/Mad1/grau/Cap-D2/SMC1/Mau2/SA/Cdc27/Klp67A/SMC3/Klp3A/Eb1	17
GO:0000819	sister chromatid segregation	15/199	244/18885	4.98602e-08	4.51235e-06	4.14102e-06	spas/pds5/Cap-G/Dhc64C/Rbf/SMC2/Mad1/Cap-D2/SMC1/Mau2/SA/Cdc27/Klp67A/SMC3/Eb1	15
GO:0006325	chromatin organization	21/199	496/18885	6.89027e-08	5.66882e-06	5.20232e-06	His4r/Arp5/Fmr1/CG18004/mof/fs(1)h/msl-3/Iswi/Hel25E/Bap55/AGO1/Nipped-A/dom/pho/U2A/Acf/vig2/NC2beta/upSET/stwl/msl-1	21
GO:0031123	RNA 3'-end processing	11/199	129/18885	1.21493e-07	9.16263e-06	8.40862e-06	Fmr1/Cpsf6/Nop60B/Sym/Nab2/SF2/Cpsf160/swm/defl/IntS2/IntS4	11
GO:0007059	chromosome segregation	17/199	361/18885	2.97268e-07	2.06945e-05	1.89915e-05	spas/pds5/Cap-G/Dhc64C/Rbf/SMC2/Mad1/grau/Cap-D2/SMC1/Mau2/SA/Cdc27/Klp67A/SMC3/Klp3A/Eb1	17
GO:0002181	cytoplasmic translation	13/199	212/18885	4.11243e-07	2.65839e-05	2.43963e-05	RpL15/eRF1/RpL37a/RpL32/RpL19/RpL21/RpL6/RpL27/RpL36A/eIF3a/RpL13A/RpL7A/RpS14a	13
GO:0050684	regulation of mRNA processing	14/199	268/18885	1.01426e-06	6.11934e-05	5.61577e-05	Fmr1/Doa/Cpsf6/Hakai/crn/Hel25E/dom/Nab2/SF2/swm/CG2926/Srrm1/l(3)72Ab/l(1)G0007	14
GO:0050657	nucleic acid transport	11/199	162/18885	1.20594e-06	6.41986e-05	5.89156e-05	Fmr1/Cbp80/Dhc64C/Hel25E/Ref1/SF2/CG5382/Nup93-2/swm/Hpr1/CG18259	11
GO:0050658	RNA transport	11/199	162/18885	1.20594e-06	6.41986e-05	5.89156e-05	Fmr1/Cbp80/Dhc64C/Hel25E/Ref1/SF2/CG5382/Nup93-2/swm/Hpr1/CG18259	11
GO:0051236	establishment of RNA localization	11/199	165/18885	1.44503e-06	7.26528e-05	6.66741e-05	Fmr1/Cbp80/Dhc64C/Hel25E/Ref1/SF2/CG5382/Nup93-2/swm/Hpr1/CG18259	11
GO:0022618	ribonucleoprotein complex assembly	11/199	187/18885	4.87817e-06	0.000232355	0.000213234	Prp8/crn/CG12325/AGO1/RpL6/Non3/eIF3a/SmD1/l(3)72Ab/CG7564/RpS14a	11
GO:0006338	chromatin remodeling	12/199	229/18885	5.92909e-06	0.000259643	0.000238277	His4r/Arp5/CG18004/fs(1)h/Iswi/Hel25E/Bap55/Nipped-A/dom/pho/Acf/NC2beta	12
GO:0071826	ribonucleoprotein complex subunit organization	11/199	192/18885	6.27966e-06	0.000259643	0.000238277	Prp8/crn/CG12325/AGO1/RpL6/Non3/eIF3a/SmD1/l(3)72Ab/CG7564/RpS14a	11
GO:0006473	protein acetylation	10/199	157/18885	6.5826e-06	0.000259643	0.000238277	mof/msl-3/e(y)1/Bap55/Nipped-A/dom/NC2beta/upSET/Naa35/msl-1	10
GO:0015931	nucleobase-containing compound transport	11/199	193/18885	6.59867e-06	0.000259643	0.000238277	Fmr1/Cbp80/Dhc64C/Hel25E/Ref1/SF2/CG5382/Nup93-2/swm/Hpr1/CG18259	11
GO:1903311	regulation of mRNA metabolic process	15/199	362/18885	7.22767e-06	0.000267387	0.000245384	Fmr1/Doa/Cpsf6/Hakai/crn/Hel25E/AGO1/dom/Nab2/SF2/swm/CG2926/Srrm1/l(3)72Ab/l(1)G0007	15
GO:0000380	alternative mRNA splicing, via spliceosome	12/199	234/18885	7.38639e-06	0.000267387	0.000245384	Doa/Cpsf6/Hakai/crn/Hel25E/Srrm234/dom/SF2/CG2926/Srrm1/l(3)72Ab/l(1)G0007	12
GO:0042273	ribosomal large subunit biogenesis	7/199	72/18885	1.07154e-05	0.000372979	0.000342286	Non1/pit/CG13096/RpL6/CG12499/Non3/RpL7A	7
GO:0043631	RNA polyadenylation	6/199	50/18885	1.37151e-05	0.000459711	0.000421881	Fmr1/Cpsf6/Sym/Nab2/Cpsf160/swm	6
GO:0051028	mRNA transport	7/199	79/18885	1.98154e-05	0.000640463	0.000587759	Fmr1/Cbp80/Hel25E/Ref1/Nup93-2/Hpr1/CG18259	7
GO:0016573	histone acetylation	9/199	144/18885	2.23227e-05	0.000688619	0.000631952	mof/msl-3/e(y)1/Bap55/Nipped-A/dom/NC2beta/upSET/msl-1	9
GO:0006405	RNA export from nucleus	7/199	81/18885	2.33517e-05	0.000688619	0.000631952	Hel25E/Ref1/SF2/Nup93-2/swm/Hpr1/CG18259	7
GO:0006475	internal protein amino acid acetylation	9/199	147/18885	2.62953e-05	0.000688619	0.000631952	mof/msl-3/e(y)1/Bap55/Nipped-A/dom/NC2beta/upSET/msl-1	9
GO:0018393	internal peptidyl-lysine acetylation	9/199	147/18885	2.62953e-05	0.000688619	0.000631952	mof/msl-3/e(y)1/Bap55/Nipped-A/dom/NC2beta/upSET/msl-1	9
GO:0018394	peptidyl-lysine acetylation	9/199	147/18885	2.62953e-05	0.000688619	0.000631952	mof/msl-3/e(y)1/Bap55/Nipped-A/dom/NC2beta/upSET/msl-1	9
GO:0043484	regulation of RNA splicing	12/199	266/18885	2.65712e-05	0.000688619	0.000631952	Doa/Cpsf6/Hakai/crn/Hel25E/dom/SF2/glo/CG2926/Srrm1/l(3)72Ab/l(1)G0007	12
GO:0031124	mRNA 3'-end processing	7/199	83/18885	2.73926e-05	0.000688619	0.000631952	Fmr1/Cpsf6/Sym/Nab2/SF2/Cpsf160/swm	7
GO:0042274	ribosomal small subunit biogenesis	7/199	83/18885	2.73926e-05	0.000688619	0.000631952	CG12325/l(2)34Fd/CG5589/CG16753/CG9004/CG2260/RpS14a	7
GO:0000381	regulation of alternative mRNA splicing, via spliceosome	11/199	228/18885	3.1373e-05	0.000767366	0.000704218	Doa/Cpsf6/Hakai/crn/Hel25E/dom/SF2/CG2926/Srrm1/l(3)72Ab/l(1)G0007	11
GO:0030490	maturation of SSU-rRNA	6/199	59/18885	3.59472e-05	0.000856112	0.000785661	CG12325/l(2)34Fd/CG5589/CG16753/CG2260/RpS14a	6
GO:0007062	sister chromatid cohesion	6/199	60/18885	3.95941e-05	0.000918786	0.000843178	pds5/Rbf/SMC1/Mau2/SA/SMC3	6
GO:0018205	peptidyl-lysine modification	12/199	283/18885	4.85725e-05	0.00109895	0.00100852	ND-ACP/mof/msl-3/e(y)1/Bap55/Ctr9/Nipped-A/dom/vig2/NC2beta/upSET/msl-1	12
GO:0048024	regulation of mRNA splicing, via spliceosome	11/199	240/18885	5.00588e-05	0.00110496	0.00101403	Doa/Cpsf6/Hakai/crn/Hel25E/dom/SF2/CG2926/Srrm1/l(3)72Ab/l(1)G0007	11
GO:0043543	protein acylation	10/199	204/18885	6.30991e-05	0.00135964	0.00124775	mof/msl-3/e(y)1/Bap55/Nipped-A/dom/NC2beta/upSET/Naa35/msl-1	10
GO:0016570	histone modification	13/199	345/18885	7.88812e-05	0.00166017	0.00152356	mof/msl-3/e(y)1/Bap55/Ctr9/Nipped-A/dom/vig2/NC2beta/upSET/CG14220/msl-1/Bre1	13
GO:0006403	RNA localization	13/199	354/18885	0.00010212	0.00205462	0.00188554	Fmr1/Cbp80/Dhc64C/Hel25E/TER94/Ref1/SF2/CG5382/Nup93-2/glo/swm/Hpr1/CG18259	13
GO:0071824	protein-DNA complex subunit organization	9/199	175/18885	0.000102163	0.00205462	0.00188554	His4r/Iswi/e(y)1/Bap55/Nipped-A/dom/Acf/TAF1B/NC2beta	9
GO:0006913	nucleocytoplasmic transport	10/199	221/18885	0.000122543	0.0023596	0.00216542	Gp210/Pen/Hel25E/Ref1/SF2/Nup93-2/swm/Hpr1/msk/CG18259	10
GO:0051169	nuclear transport	10/199	221/18885	0.000122543	0.0023596	0.00216542	Gp210/Pen/Hel25E/Ref1/SF2/Nup93-2/swm/Hpr1/msk/CG18259	10
GO:0006406	mRNA export from nucleus	5/199	56/18885	0.000305133	0.00575302	0.0052796	Hel25E/Ref1/Nup93-2/Hpr1/CG18259	5
GO:0034728	nucleosome organization	6/199	92/18885	0.000426783	0.00788242	0.00723377	His4r/Iswi/Bap55/Nipped-A/dom/Acf	6
GO:0071897	DNA biosynthetic process	5/199	67/18885	0.000702638	0.0127178	0.0116712	mip120/Orc1/Rbf/mip130/pic	5
GO:0051168	nuclear export	7/199	150/18885	0.00107382	0.0190551	0.017487	Hel25E/Ref1/SF2/Nup93-2/swm/Hpr1/CG18259	7
GO:0065004	protein-DNA complex assembly	6/199	110/18885	0.00109667	0.0190862	0.0175156	His4r/Iswi/e(y)1/Acf/TAF1B/NC2beta	6
GO:0040029	regulation of gene expression, epigenetic	8/199	220/18885	0.00236515	0.0403861	0.0370627	Fmr1/mof/msl-3/AGO1/pho/Acf/upSET/msl-1	8
GO:0006352	DNA-templated transcription, initiation	6/199	129/18885	0.00247139	0.0414186	0.0380102	His4r/Taf5/e(y)1/SF2/TAF1B/NC2beta	6

## Sheet: H3K9me3_H4K16Ac_vs_H3K9me3
ID	Description	GeneRatio	BgRatio	pvalue	p.adjust	qvalue	geneID	Count
GO:0042254	ribosome biogenesis	32/202	283/18885	1.26965e-23	1.24171e-20	1.1654e-20	CG11180/Ran/hoip/RpS19a/Rtc1/P32/CG12909/Nopp140/CG4038/Pop1/Rrp40/CG33217/Sas10/wcd/CG7006/ppan/Surf6/CG9107/CG11030/mbm/Rrp47/RpL23A/CG3735/Rrp4/CG32708/Rbm13/CG1789/CG3527/CG2875/CG3071/CG14805/RpS5a	32
GO:0022613	ribonucleoprotein complex biogenesis	36/202	413/18885	1.33525e-22	6.52936e-20	6.12808e-20	eIF2gamma/CG9667/CG11180/Ran/hoip/RpS19a/Rtc1/P32/CG12909/Nopp140/CG4038/Pop1/Rrp40/CG33217/Sas10/wcd/CG7006/ppan/Surf6/SmE/CG9107/CG11030/mbm/AGO2/Rrp47/RpL23A/CG3735/Rrp4/CG32708/Rbm13/CG1789/CG3527/CG2875/CG3071/CG14805/RpS5a	36
GO:0006364	rRNA processing	21/202	187/18885	9.54758e-16	2.44805e-13	2.2976e-13	Rtc1/CG12909/Nopp140/CG4038/Pop1/Rrp40/CG33217/Sas10/wcd/ppan/CG9107/CG11030/Rrp47/CG3735/Rrp4/CG32708/Rbm13/CG1789/CG3527/CG3071/CG14805	21
GO:0016072	rRNA metabolic process	22/202	212/18885	1.02987e-15	2.44805e-13	2.2976e-13	Rtc1/CG12909/Nopp140/CG4038/Pop1/Rrp40/CG33217/Sas10/wcd/ppan/Rrp46/CG9107/CG11030/Rrp47/CG3735/Rrp4/CG32708/Rbm13/CG1789/CG3527/CG3071/CG14805	22
GO:0034470	ncRNA processing	27/202	355/18885	1.25156e-15	2.44805e-13	2.2976e-13	scu/Rtc1/CG12909/Nopp140/CG4038/Pop1/Rrp40/CG33217/Sas10/Cbp20/wcd/ppan/Rrp46/Nfs1/CG9107/CG11030/CG14618/AGO2/Rrp47/CG3735/Rrp4/CG32708/Rbm13/CG1789/CG3527/CG3071/CG14805	27
GO:0034660	ncRNA metabolic process	31/202	500/18885	2.4433e-15	3.98258e-13	3.73782e-13	scu/Rtc1/Rpb5/CG12909/Nopp140/CG4038/Trf4-1/Pop1/Rrp40/CG33217/Sas10/Cbp20/wcd/Rpb10/ppan/Rrp46/Nfs1/CG9107/CG11030/CG3756/CG14618/AGO2/Rrp47/CG3735/Rrp4/CG32708/Rbm13/CG1789/CG3527/CG3071/CG14805	31
GO:0042274	ribosomal small subunit biogenesis	10/202	83/18885	1.93598e-08	2.70484e-06	2.53861e-06	RpS19a/Sas10/Surf6/CG9107/CG11030/mbm/CG3735/CG32708/CG3071/RpS5a	10
GO:0042255	ribosome assembly	8/202	61/18885	2.70257e-07	3.30389e-05	3.10084e-05	RpS19a/P32/CG7006/ppan/CG9107/RpL23A/CG32708/RpS5a	8
GO:0090501	RNA phosphodiester bond hydrolysis	7/202	55/18885	1.89674e-06	0.000206113	0.000193445	Rtc1/Pop1/Rrp40/RpI12/CstF64/Rrp4/CG32708	7
GO:1903311	regulation of mRNA metabolic process	15/202	362/18885	8.66038e-06	0.000846985	0.000794931	HnRNP-K/how/snRNP-U1-70K/Pep/Rsf1/nito/Saf-B/Rrp40/CG17454/obe/rump/Mettl14/Rrp4/qkr58E-1/mbf1	15
GO:0022618	ribonucleoprotein complex assembly	10/202	187/18885	3.43209e-05	0.00305144	0.00286391	eIF2gamma/CG9667/RpS19a/ppan/SmE/CG9107/AGO2/RpL23A/CG32708/RpS5a	10
GO:0071826	ribonucleoprotein complex subunit organization	10/202	192/18885	4.29482e-05	0.00350028	0.00328516	eIF2gamma/CG9667/RpS19a/ppan/SmE/CG9107/AGO2/RpL23A/CG32708/RpS5a	10
GO:0090305	nucleic acid phosphodiester bond hydrolysis	7/202	90/18885	5.09352e-05	0.0038319	0.0035964	Rtc1/Pop1/Rrp40/RpI12/CstF64/Rrp4/CG32708	7
GO:0048024	regulation of mRNA splicing, via spliceosome	11/202	240/18885	5.7327e-05	0.0040047	0.00375858	HnRNP-K/how/snRNP-U1-70K/Pep/Rsf1/nito/Saf-B/CG17454/obe/Mettl14/qkr58E-1	11
GO:0031497	chromatin assembly	10/202	201/18885	6.31787e-05	0.00411925	0.00386609	ADD1/lolal/Su(var)205/His1:CG33861/P32/CG7137/cid/scny/AGO2/MRG15	10
GO:0002181	cytoplasmic translation	10/202	212/18885	9.84372e-05	0.00601697	0.00564719	CNBP/eIF2gamma/RpS19a/RpS10b/RpS18/RpL8/RpL23A/RpL12/RpL9/RpS5a	10
GO:0043484	regulation of RNA splicing	11/202	266/18885	0.000142974	0.00782804	0.00734695	HnRNP-K/how/snRNP-U1-70K/Pep/Rsf1/nito/Saf-B/CG17454/obe/Mettl14/qkr58E-1	11
GO:0007059	chromosome segregation	13/202	361/18885	0.000144074	0.00782804	0.00734695	14-3-3zeta/Tlk/SMC5/Pp1-87B/mod(mdg4)/Lhr/cid/Bub3/bel/Cenp-C/borr/mad2/MRG15	13
GO:0050684	regulation of mRNA processing	11/202	268/18885	0.000152651	0.00785751	0.0073746	HnRNP-K/how/snRNP-U1-70K/Pep/Rsf1/nito/Saf-B/CG17454/obe/Mettl14/qkr58E-1	11
GO:0000381	regulation of alternative mRNA splicing, via spliceosome	10/202	228/18885	0.000178583	0.0087327	0.00819602	HnRNP-K/how/snRNP-U1-70K/Rsf1/nito/Saf-B/CG17454/obe/Mettl14/qkr58E-1	10
GO:0006399	tRNA metabolic process	9/202	189/18885	0.00020452	0.00952478	0.00893941	scu/Rpb5/Pop1/Rrp40/Rpb10/Nfs1/CG3756/CG14618/Rrp4	9
GO:0000380	alternative mRNA splicing, via spliceosome	10/202	234/18885	0.000220261	0.00979158	0.00918982	HnRNP-K/how/snRNP-U1-70K/Rsf1/nito/Saf-B/CG17454/obe/Mettl14/qkr58E-1	10
GO:0030490	maturation of SSU-rRNA	5/202	59/18885	0.000417464	0.0173311	0.0162659	Sas10/CG11030/CG3735/CG32708/CG3071	5
GO:0031507	heterochromatin assembly	8/202	166/18885	0.000425302	0.0173311	0.0162659	ADD1/lolal/Su(var)205/CG7137/cid/scny/AGO2/MRG15	8
GO:0045814	negative regulation of gene expression, epigenetic	8/202	168/18885	0.000460619	0.0180194	0.016912	ADD1/lolal/Su(var)205/CG7137/cid/scny/AGO2/MRG15	8
GO:0070828	heterochromatin organization	8/202	173/18885	0.000559422	0.0210429	0.0197496	ADD1/lolal/Su(var)205/CG7137/cid/scny/AGO2/MRG15	8
GO:0006325	chromatin organization	14/202	496/18885	0.000938913	0.0338037	0.0317262	ADD1/Tlk/lolal/Su(var)205/His1:CG33861/P32/CG7137/osa/cid/Nph/scny/AGO2/MRG15/Act5C	14
GO:0001510	RNA methylation	5/202	71/18885	0.000979013	0.0338037	0.0317262	nito/Nopp140/Mettl14/CG14618/CG3527	5
GO:0010608	post-transcriptional regulation of gene expression	13/202	443/18885	0.00100236	0.0338037	0.0317262	CNBP/eIF2gamma/hoip/how/eIF4G1/Rrp40/Atx2/Larp4B/Cbp20/rump/AGO2/Rrp4/mbf1	13
GO:0042273	ribosomal large subunit biogenesis	5/202	72/18885	0.00104306	0.0340037	0.031914	CG7006/ppan/Surf6/RpL23A/Rbm13	5
GO:0006401	RNA catabolic process	8/202	192/18885	0.00110243	0.0347799	0.0326424	Rat1/Trf4-1/LSm3/Rrp40/Rrp46/rump/Rrp4/mbf1	8
GO:0043414	macromolecule methylation	8/202	193/18885	0.00113977	0.0348341	0.0326933	Su(var)205/nito/Nopp140/Mettl14/Rbbp5/CG14618/CG3527/MRG15	8
GO:0000819	sister chromatid segregation	9/202	244/18885	0.00128923	0.0382081	0.0358599	SMC5/Pp1-87B/Lhr/cid/Bub3/bel/Cenp-C/borr/mad2	9
GO:0032259	methylation	8/202	199/18885	0.00138552	0.0398542	0.0374049	Su(var)205/nito/Nopp140/Mettl14/Rbbp5/CG14618/CG3527/MRG15	8
GO:0006402	mRNA catabolic process	7/202	157/18885	0.00152371	0.0413941	0.0388501	Rat1/LSm3/Rrp40/Rrp46/rump/Rrp4/mbf1	7
GO:0009451	RNA modification	7/202	157/18885	0.00152371	0.0413941	0.0388501	nito/Nopp140/CG4038/Nfs1/Mettl14/CG14618/CG3527	7
GO:0006997	nucleus organization	7/202	163/18885	0.00188751	0.0498915	0.0468253	tacc/Ran/P32/CG7137/sle/Nph/Nup35	7

## Sheet: H3K4me3_H3K4me3_vs_H3K9me3
ID	Description	GeneRatio	BgRatio	pvalue	p.adjust	qvalue	geneID	Count
GO:0022613	ribonucleoprotein complex biogenesis	49/368	413/18885	1.63112e-24	1.57596e-21	1.41779e-21	Non1/pit/Prp8/fand/CG8414/CG13096/rept/Nop60B/su(w[a])/crn/CG12325/Mat89Ba/CG32344/hfp/Nop56/l(2)34Fd/CG7637/RpL6/CG15561/CG1542/CG12499/CG8064/Non3/CG9799/pont/SmD2/l(2)05287/Nnp-1/CG6686/CG13097/l(2)k09022/eIF3a/Rexo5/CG18178/SmD1/Sf3a2/l(3)72Ab/l(3)72Dn/CG7728/CG5589/CG16753/CG9004/CG7246/l(1)G0020/CG2260/MCTS1/Mybbp1A/Mtr4/RpL7	49
GO:0006325	chromatin organization	53/368	496/18885	2.74318e-24	1.57596e-21	1.41779e-21	Mtor/His4r/Arp5/bon/Fmr1/Bap170/CG18004/tou/pea/wds/Lam/kis/E(bx)/rept/Mi-2/mof/His3:CG31613/fs(1)h/Arp6/Su(var)3-9/msl-3/Iswi/His2A:CG33859/HipHop/DMAP1/Nipped-B/Nipped-A/dre4/dom/pho/Hcf/U2A/Acf/polybromo/pont/CG7483/barr/NC2beta/pzg/CTCF/Gcn5/upSET/stwl/FRG1/Ulp1/Arp8/Nup153/Atac3/ocm/vir/Nup93-1/msl-1/Ndf	53
GO:0034470	ncRNA processing	43/368	355/18885	5.99921e-22	2.2977e-19	2.0671e-19	pit/CG8414/IntS8/Cbp80/CG13096/Nop60B/CG12325/IntS3/Mat89Ba/CG32344/IntS9/Nop56/l(2)34Fd/CG7637/CG1542/IntS11/CG12499/CG8064/Non3/omd/CG9799/l(2)05287/CG10463/Nnp-1/CG6686/CG13097/l(2)k09022/Rexo5/CG18178/defl/l(3)72Dn/CG7728/CG5589/IntS2/CG16753/IntS1/CG7246/l(1)G0020/IntS4/CG2260/IntS6/Mtr4/RpL7	43
GO:0016072	rRNA metabolic process	33/368	212/18885	1.83223e-20	5.26308e-18	4.73487e-18	pit/CG8414/CG13096/rept/Nop60B/CG12325/Mat89Ba/CG32344/Nop56/l(2)34Fd/CG7637/CG1542/CG12499/CG8064/Non3/CG9799/l(2)05287/Nnp-1/CG6686/CG13097/l(2)k09022/Rexo5/CG18178/l(3)72Dn/CG7728/CG5589/CG16753/CG7246/l(1)G0020/CG2260/Mybbp1A/Mtr4/RpL7	33
GO:0006364	rRNA processing	31/368	187/18885	4.06813e-20	9.34856e-18	8.41032e-18	pit/CG8414/CG13096/Nop60B/CG12325/Mat89Ba/CG32344/Nop56/l(2)34Fd/CG7637/CG1542/CG12499/CG8064/Non3/CG9799/l(2)05287/Nnp-1/CG6686/CG13097/l(2)k09022/Rexo5/CG18178/l(3)72Dn/CG7728/CG5589/CG16753/CG7246/l(1)G0020/CG2260/Mtr4/RpL7	31
GO:0034660	ncRNA metabolic process	47/368	500/18885	2.7223e-19	5.15426e-17	4.63697e-17	pit/CG8414/IntS8/RpIIIC160/Cbp80/CG13096/rept/Nop60B/RpIII128/CG12325/IntS3/Mat89Ba/CG32344/IntS9/Nop56/l(2)34Fd/CG7637/CG1542/IntS11/CG12499/CG8064/Non3/omd/CG9799/l(2)05287/CG10463/Nnp-1/CG6686/CG13097/l(2)k09022/Rexo5/CG18178/defl/l(3)72Dn/CG7728/CG5589/IntS2/CG16753/IntS1/CG7246/l(1)G0020/IntS4/CG2260/IntS6/Mybbp1A/Mtr4/RpL7	47
GO:0042254	ribosome biogenesis	36/368	283/18885	3.14011e-19	5.15426e-17	4.63697e-17	Non1/pit/CG8414/CG13096/Nop60B/CG12325/Mat89Ba/CG32344/Nop56/l(2)34Fd/CG7637/RpL6/CG15561/CG1542/CG12499/CG8064/Non3/CG9799/l(2)05287/Nnp-1/CG6686/CG13097/l(2)k09022/Rexo5/CG18178/l(3)72Dn/CG7728/CG5589/CG16753/CG9004/CG7246/l(1)G0020/CG2260/Mybbp1A/Mtr4/RpL7	36
GO:0006338	chromatin remodeling	30/368	229/18885	1.46417e-16	2.10291e-14	1.89186e-14	Mtor/His4r/Arp5/Bap170/CG18004/tou/wds/kis/E(bx)/rept/Mi-2/His3:CG31613/fs(1)h/Arp6/Su(var)3-9/Iswi/HipHop/DMAP1/Nipped-A/dom/pho/Hcf/Acf/polybromo/pont/NC2beta/Gcn5/Arp8/Nup153/Atac3	30
GO:0006405	RNA export from nucleus	18/368	81/18885	1.62072e-14	2.06912e-12	1.86146e-12	Mtor/Nup75/Mat89Ba/Ref1/SF2/Nup154/Nup107/Gle1/Nup98-96/Nup133/Nup93-2/CG14712/Hpr1/tho2/CG18259/Nup153/Nup93-1/Nup160	18
GO:0016570	histone modification	33/368	345/18885	4.82512e-14	5.54407e-12	4.98765e-12	Kdm2/Set2/NO66/wds/rept/mof/Su(var)3-9/msl-3/e(y)1/Set1/Br140/Ctr9/DMAP1/Nipped-A/Ing5/trr/dom/ebi/Hcf/MBD-R2/pont/NC2beta/LKRSDH/atms/Gcn5/upSET/FRG1/CG14220/Atac3/l(1)G0020/msl-1/Ndf/Bre1	33
GO:0018205	peptidyl-lysine modification	29/368	283/18885	3.07935e-13	3.1532e-11	2.83674e-11	Set2/wds/ND-ACP/rept/mof/Su(var)3-9/msl-3/e(y)1/Set1/Br140/Ctr9/DMAP1/Nipped-A/Ing5/trr/dom/Hcf/MBD-R2/pont/NC2beta/atms/Gcn5/upSET/FRG1/Ulp1/Atac3/l(1)G0020/msl-1/Ndf	29
GO:0000819	sister chromatid segregation	27/368	244/18885	3.29316e-13	3.1532e-11	2.83674e-11	Mtor/spas/pds5/Cap-G/Dhc64C/SMC5/Mi-2/vtd/RfC4/Orc5/Rbf/SMC2/Mad1/Nipped-B/Chro/RfC38/glu/Cap-D2/Mink/SMC1/Mau2/barr/SA/Cdc27/Klp67A/SMC3/Eb1	27
GO:0140014	mitotic nuclear division	29/368	290/18885	5.73618e-13	5.0699e-11	4.56107e-11	Mtor/spas/pds5/Cap-G/Lam/Dhc64C/vtd/Klp61F/14-3-3epsilon/Orc5/Rbf/Myb/SMC2/Mad1/Nipped-B/Chro/glu/Cap-D2/Mink/SMC1/Mau2/pont/barr/SA/Cdc27/Klp67A/SMC3/Klp3A/Eb1	29
GO:0098813	nuclear chromosome segregation	30/368	313/18885	6.80998e-13	5.58905e-11	5.02812e-11	Mtor/spas/pds5/Cap-G/Dhc64C/SMC5/Mi-2/east/vtd/RfC4/Orc5/Rbf/SMC2/Mad1/Nipped-B/Chro/grau/RfC38/glu/Cap-D2/Mink/SMC1/Mau2/barr/SA/Cdc27/Klp67A/SMC3/Klp3A/Eb1	30
GO:0031123	RNA 3'-end processing	20/368	129/18885	7.6279e-13	5.80456e-11	5.222e-11	Fmr1/IntS8/Nop60B/su(f)/Sym/IntS9/Cpsf100/Nab2/SF2/Cpsf160/IntS11/Cpsf73/omd/Srp54/Rexo5/defl/IntS2/IntS1/IntS4/IntS6	20
GO:0050657	nucleic acid transport	22/368	162/18885	8.58812e-13	5.80456e-11	5.222e-11	Mtor/Fmr1/Nup75/Cbp80/Dhc64C/Mat89Ba/Ref1/SF2/Nup154/Nup107/Gle1/Nup98-96/Nup133/CG5382/Nup93-2/CG14712/Hpr1/tho2/CG18259/Nup153/Nup93-1/Nup160	22
GO:0050658	RNA transport	22/368	162/18885	8.58812e-13	5.80456e-11	5.222e-11	Mtor/Fmr1/Nup75/Cbp80/Dhc64C/Mat89Ba/Ref1/SF2/Nup154/Nup107/Gle1/Nup98-96/Nup133/CG5382/Nup93-2/CG14712/Hpr1/tho2/CG18259/Nup153/Nup93-1/Nup160	22
GO:0051236	establishment of RNA localization	22/368	165/18885	1.25448e-12	8.00779e-11	7.20412e-11	Mtor/Fmr1/Nup75/Cbp80/Dhc64C/Mat89Ba/Ref1/SF2/Nup154/Nup107/Gle1/Nup98-96/Nup133/CG5382/Nup93-2/CG14712/Hpr1/tho2/CG18259/Nup153/Nup93-1/Nup160	22
GO:0007059	chromosome segregation	31/368	361/18885	5.04625e-12	3.05165e-10	2.74538e-10	Mtor/spas/pds5/Cap-G/Pp2A-29B/Dhc64C/SMC5/Mi-2/east/vtd/RfC4/Orc5/Rbf/SMC2/Mad1/Nipped-B/Chro/grau/RfC38/glu/Cap-D2/Mink/SMC1/Mau2/barr/SA/Cdc27/Klp67A/SMC3/Klp3A/Eb1	31
GO:0016573	histone acetylation	20/368	144/18885	6.25299e-12	3.59234e-10	3.23181e-10	wds/rept/mof/msl-3/e(y)1/Br140/DMAP1/Nipped-A/Ing5/dom/Hcf/MBD-R2/pont/NC2beta/Gcn5/upSET/Atac3/l(1)G0020/msl-1/Ndf	20
GO:0006475	internal protein amino acid acetylation	20/368	147/18885	9.22429e-12	4.60814e-10	4.14566e-10	wds/rept/mof/msl-3/e(y)1/Br140/DMAP1/Nipped-A/Ing5/dom/Hcf/MBD-R2/pont/NC2beta/Gcn5/upSET/Atac3/l(1)G0020/msl-1/Ndf	20
GO:0018393	internal peptidyl-lysine acetylation	20/368	147/18885	9.22429e-12	4.60814e-10	4.14566e-10	wds/rept/mof/msl-3/e(y)1/Br140/DMAP1/Nipped-A/Ing5/dom/Hcf/MBD-R2/pont/NC2beta/Gcn5/upSET/Atac3/l(1)G0020/msl-1/Ndf	20
GO:0018394	peptidyl-lysine acetylation	20/368	147/18885	9.22429e-12	4.60814e-10	4.14566e-10	wds/rept/mof/msl-3/e(y)1/Br140/DMAP1/Nipped-A/Ing5/dom/Hcf/MBD-R2/pont/NC2beta/Gcn5/upSET/Atac3/l(1)G0020/msl-1/Ndf	20
GO:0006606	protein import into nucleus	16/368	87/18885	1.05302e-11	5.04132e-10	4.53537e-10	Mtor/Nup75/Gp210/Fs(2)Ket/Pen/Nup205/Kap-alpha3/Nup154/Nup107/Nup98-96/Nup133/Nup93-2/CG14712/Nup153/Nup93-1/Nup160	16
GO:0051170	import into nucleus	16/368	90/18885	1.80973e-11	8.31751e-10	7.48275e-10	Mtor/Nup75/Gp210/Fs(2)Ket/Pen/Nup205/Kap-alpha3/Nup154/Nup107/Nup98-96/Nup133/Nup93-2/CG14712/Nup153/Nup93-1/Nup160	16
GO:0034504	protein localization to nucleus	17/368	105/18885	2.00921e-11	8.87915e-10	7.98802e-10	Mtor/Nup75/Gp210/Fs(2)Ket/Lam/Pen/Nup205/Kap-alpha3/Nup154/Nup107/Nup98-96/Nup133/Nup93-2/CG14712/Nup153/Nup93-1/Nup160	17
GO:0015931	nucleobase-containing compound transport	22/368	193/18885	2.99528e-11	1.27466e-09	1.14673e-09	Mtor/Fmr1/Nup75/Cbp80/Dhc64C/Mat89Ba/Ref1/SF2/Nup154/Nup107/Gle1/Nup98-96/Nup133/CG5382/Nup93-2/CG14712/Hpr1/tho2/CG18259/Nup153/Nup93-1/Nup160	22
GO:0006473	protein acetylation	20/368	157/18885	3.15279e-11	1.29377e-09	1.16392e-09	wds/rept/mof/msl-3/e(y)1/Br140/DMAP1/Nipped-A/Ing5/dom/Hcf/MBD-R2/pont/NC2beta/Gcn5/upSET/Atac3/l(1)G0020/msl-1/Ndf	20
GO:0000070	mitotic sister chromatid segregation	23/368	218/18885	5.18096e-11	2.05273e-09	1.84671e-09	Mtor/spas/pds5/Cap-G/Dhc64C/vtd/Orc5/Rbf/SMC2/Mad1/Nipped-B/Chro/glu/Cap-D2/Mink/SMC1/Mau2/barr/SA/Cdc27/Klp67A/SMC3/Eb1	23
GO:0006913	nucleocytoplasmic transport	23/368	221/18885	6.84185e-11	2.5359e-09	2.28139e-09	Mtor/Nup75/Gp210/Fs(2)Ket/Pen/Mat89Ba/Nup205/Ref1/SF2/Kap-alpha3/Nup154/Nup107/Gle1/Nup98-96/Nup133/Nup93-2/CG14712/Hpr1/tho2/CG18259/Nup153/Nup93-1/Nup160	23
GO:0051169	nuclear transport	23/368	221/18885	6.84185e-11	2.5359e-09	2.28139e-09	Mtor/Nup75/Gp210/Fs(2)Ket/Pen/Mat89Ba/Nup205/Ref1/SF2/Kap-alpha3/Nup154/Nup107/Gle1/Nup98-96/Nup133/Nup93-2/CG14712/Hpr1/tho2/CG18259/Nup153/Nup93-1/Nup160	23
GO:0051028	mRNA transport	14/368	79/18885	3.51894e-10	1.26352e-08	1.13671e-08	Mtor/Fmr1/Nup75/Cbp80/Ref1/Nup107/Gle1/Nup133/Nup93-2/Hpr1/tho2/CG18259/Nup93-1/Nup160	14
GO:0006406	mRNA export from nucleus	12/368	56/18885	6.47573e-10	2.25473e-08	2.02844e-08	Mtor/Nup75/Ref1/Nup107/Gle1/Nup133/Nup93-2/Hpr1/tho2/CG18259/Nup93-1/Nup160	12
GO:0051168	nuclear export	18/368	150/18885	8.33648e-10	2.81724e-08	2.5345e-08	Mtor/Nup75/Mat89Ba/Ref1/SF2/Nup154/Nup107/Gle1/Nup98-96/Nup133/Nup93-2/CG14712/Hpr1/tho2/CG18259/Nup153/Nup93-1/Nup160	18
GO:0000380	alternative mRNA splicing, via spliceosome	22/368	234/18885	1.2555e-09	4.12161e-08	3.70796e-08	fand/pea/Doa/crn/Srrm234/dom/hfp/ps/SF2/Sf3a1/obe/pps/Srp54/Caper/CG2926/CG11454/Srrm1/l(3)72Ab/Flacc/l(1)G0007/CG7879/vir	22
GO:0007062	sister chromatid cohesion	12/368	60/18885	1.51307e-09	4.82921e-08	4.34454e-08	pds5/SMC5/Mi-2/vtd/RfC4/Rbf/Nipped-B/RfC38/SMC1/Mau2/SA/SMC3	12
GO:0006403	RNA localization	27/368	354/18885	1.74673e-09	5.42432e-08	4.87992e-08	Mtor/Fmr1/Nup75/Cbp80/Dhc64C/Sry-delta/mago/TER94/Mat89Ba/Ref1/SF2/Nup154/Nup107/Gle1/Nup98-96/Nup133/CG5382/Nup93-2/glo/CG14712/CG7483/Hpr1/tho2/CG18259/Nup153/Nup93-1/Nup160	27
GO:0050684	regulation of mRNA processing	23/368	268/18885	3.10571e-09	9.3907e-08	8.44823e-08	Fmr1/fand/pea/Doa/crn/dom/hfp/ps/Nab2/SF2/Sf3a1/obe/pps/Srp54/Caper/CG2926/CG11454/Srrm1/l(3)72Ab/Flacc/l(1)G0007/CG7879/vir	23
GO:0043543	protein acylation	20/368	204/18885	3.48384e-09	1.02639e-07	9.23381e-08	wds/rept/mof/msl-3/e(y)1/Br140/DMAP1/Nipped-A/Ing5/dom/Hcf/MBD-R2/pont/NC2beta/Gcn5/upSET/Atac3/l(1)G0020/msl-1/Ndf	20
GO:0000381	regulation of alternative mRNA splicing, via spliceosome	21/368	228/18885	4.34797e-09	1.24895e-07	1.12361e-07	fand/pea/Doa/crn/dom/hfp/ps/SF2/Sf3a1/obe/pps/Srp54/Caper/CG2926/CG11454/Srrm1/l(3)72Ab/Flacc/l(1)G0007/CG7879/vir	21
GO:0048024	regulation of mRNA splicing, via spliceosome	21/368	240/18885	1.08367e-08	3.03691e-07	2.73212e-07	fand/pea/Doa/crn/dom/hfp/ps/SF2/Sf3a1/obe/pps/Srp54/Caper/CG2926/CG11454/Srrm1/l(3)72Ab/Flacc/l(1)G0007/CG7879/vir	21
GO:0043484	regulation of RNA splicing	22/368	266/18885	1.3541e-08	3.70442e-07	3.33264e-07	fand/pea/Doa/crn/dom/hfp/ps/SF2/Sf3a1/obe/pps/glo/Srp54/Caper/CG2926/CG11454/Srrm1/l(3)72Ab/Flacc/l(1)G0007/CG7879/vir	22
GO:0030490	maturation of SSU-rRNA	11/368	59/18885	1.60621e-08	4.29194e-07	3.86119e-07	CG12325/l(2)34Fd/CG8064/l(2)k09022/l(3)72Dn/CG7728/CG5589/CG16753/CG7246/l(1)G0020/CG2260	11
GO:0071824	protein-DNA complex subunit organization	17/368	175/18885	6.05765e-08	1.58187e-06	1.42311e-06	His4r/Taf2/rept/His3:CG31613/Arp6/Su(var)3-9/Taf6/Iswi/e(y)1/HipHop/DMAP1/Nipped-A/dom/Acf/pont/NC2beta/Bdp1	17
GO:0071897	DNA biosynthetic process	11/368	67/18885	6.41593e-08	1.6382e-06	1.47379e-06	rad50/mip120/Orc1/Rbf/Myb/Cul4/mip40/DNAlig3/Blm/mip130/pic	11
GO:0017038	protein import	16/368	156/18885	6.9635e-08	1.71187e-06	1.54006e-06	Mtor/Nup75/Gp210/Fs(2)Ket/Pen/Nup205/Kap-alpha3/Nup154/Nup107/Nup98-96/Nup133/Nup93-2/CG14712/Nup153/Nup93-1/Nup160	16
GO:0042274	ribosomal small subunit biogenesis	12/368	83/18885	7.00242e-08	1.71187e-06	1.54006e-06	CG12325/l(2)34Fd/CG8064/l(2)k09022/l(3)72Dn/CG7728/CG5589/CG16753/CG9004/CG7246/l(1)G0020/CG2260	12
GO:0006261	DNA-templated DNA replication	15/368	137/18885	7.51452e-08	1.79879e-06	1.61826e-06	rnh1/Orc1/RfC4/Orc5/Rbf/Orc3/RfC38/DNAlig3/Blm/CG1234/DNApol-alpha60/Orc4/Rif1/Orc6/E2f2	15
GO:0006974	cellular response to DNA damage stimulus	25/368	378/18885	1.17009e-07	2.74374e-06	2.46838e-06	rad50/FANCI/pds5/SMC5/mof/vtd/Gnf1/RfC4/14-3-3epsilon/Rbf/Cul4/HipHop/DMAP1/Nipped-B/Nipped-A/RfC38/Nup107/jnj/Ino80/DNAlig3/Blm/gkt/Arp8/pic/Nup160	25
GO:0006260	DNA replication	16/368	168/18885	1.95556e-07	4.49389e-06	4.04287e-06	rnh1/Orc1/Gnf1/RfC4/Orc5/Rbf/Orc3/RfC38/DNAlig3/Blm/CG1234/DNApol-alpha60/Orc4/Rif1/Orc6/E2f2	16
GO:1903311	regulation of mRNA metabolic process	24/368	362/18885	2.01518e-07	4.54007e-06	4.08442e-06	Fmr1/fand/pea/Doa/crn/dom/hfp/ps/Nab2/SF2/Sf3a1/obe/pps/Srp54/Caper/CG2926/CG11454/Srrm1/l(3)72Ab/Flacc/l(1)G0007/CG7879/vir/Lrpprc2	24
GO:0071826	ribonucleoprotein complex subunit organization	17/368	192/18885	2.33374e-07	5.15666e-06	4.63913e-06	Prp8/fand/pea/rept/su(w[a])/crn/CG12325/hfp/RpL6/Non3/pont/SmD2/eIF3a/SmD1/Sf3a2/l(3)72Ab/MCTS1	17
GO:0040029	regulation of gene expression, epigenetic	18/368	220/18885	3.36948e-07	7.30478e-06	6.57166e-06	Mtor/Fmr1/Lam/rept/mof/Su(var)3-9/msl-3/pho/Acf/CTCF/upSET/Ulp1/Nup153/ocm/vir/Nup93-1/msl-1/Ndf	18
GO:0006281	DNA repair	21/368	304/18885	6.05578e-07	1.28854e-05	1.15922e-05	rad50/FANCI/pds5/SMC5/mof/vtd/Gnf1/RfC4/DMAP1/Nipped-B/Nipped-A/RfC38/Nup107/jnj/Ino80/DNAlig3/Blm/gkt/Arp8/pic/Nup160	21
GO:0022618	ribonucleoprotein complex assembly	16/368	187/18885	8.38818e-07	1.75237e-05	1.5765e-05	Prp8/fand/rept/su(w[a])/crn/CG12325/hfp/RpL6/Non3/pont/SmD2/eIF3a/SmD1/Sf3a2/l(3)72Ab/MCTS1	16
GO:0042273	ribosomal large subunit biogenesis	10/368	72/18885	1.28029e-06	2.62687e-05	2.36324e-05	Non1/pit/CG8414/CG13096/RpL6/CG1542/CG12499/Non3/CG18178/RpL7	10
GO:0035075	response to ecdysone	12/368	110/18885	1.58698e-06	3.14386e-05	2.82833e-05	Set2/E(bx)/rept/Iswi/trr/BRWD3/Nup98-96/LKRSDH/pzg/l(3)psg2/CTCF/MED24	12
GO:0036314	response to sterol	12/368	110/18885	1.58698e-06	3.14386e-05	2.82833e-05	Set2/E(bx)/rept/Iswi/trr/BRWD3/Nup98-96/LKRSDH/pzg/l(3)psg2/CTCF/MED24	12
GO:0034728	nucleosome organization	11/368	92/18885	1.73759e-06	3.38388e-05	3.04427e-05	His4r/rept/His3:CG31613/Arp6/Iswi/HipHop/DMAP1/Nipped-A/dom/Acf/pont	11
GO:0000122	negative regulation of transcription by RNA polymerase II	25/368	441/18885	2.0304e-06	3.88821e-05	3.49798e-05	Mtor/mip120/CG9932/ct/kis/CG2199/Mi-2/zfh1/Nelf-E/MEP-1/Rbf/mip40/DMAP1/simj/l(3)mbt/polybromo/pnr/NC2beta/LKRSDH/CG14220/NC2alpha/Vsx1/mip130/NELF-B/E2f2	25
GO:1901654	response to ketone	12/368	114/18885	2.32401e-06	4.37753e-05	3.93819e-05	Set2/E(bx)/rept/Iswi/trr/BRWD3/Nup98-96/LKRSDH/pzg/l(3)psg2/CTCF/MED24	12
GO:0033365	protein localization to organelle	24/368	433/18885	4.78993e-06	8.87683e-05	7.98593e-05	Mtor/His2Av/Nup75/Gp210/Fs(2)Ket/Lam/Dhc64C/Mi-2/Pen/Rbf/Nipped-B/Nup205/Kap-alpha3/Nup154/Nup107/Nup98-96/Nup133/Nup93-2/CG14712/Sec63/Nup153/Nup93-1/Eb1/Nup160	24
GO:0016571	histone methylation	11/368	103/18885	5.32696e-06	9.62113e-05	8.65553e-05	Kdm2/Set2/wds/Su(var)3-9/Set1/Ctr9/trr/Hcf/LKRSDH/atms/FRG1	11
GO:0031056	regulation of histone modification	10/368	84/18885	5.35903e-06	9.62113e-05	8.65553e-05	Kdm2/mof/Ctr9/trr/ebi/LKRSDH/atms/upSET/FRG1/Ndf	10
GO:0007549	dosage compensation	8/368	53/18885	7.94316e-06	0.000140411	0.000126319	Mtor/mof/msl-3/Nup153/ocm/vir/msl-1/Ndf	8
GO:0033993	response to lipid	12/368	129/18885	8.47541e-06	0.000147549	0.000132741	Set2/E(bx)/rept/Iswi/trr/BRWD3/Nup98-96/LKRSDH/pzg/l(3)psg2/CTCF/MED24	12
GO:0065004	protein-DNA complex assembly	11/368	110/18885	1.00852e-05	0.000172954	0.000155596	His4r/Taf2/His3:CG31613/Su(var)3-9/Taf6/Iswi/e(y)1/HipHop/Acf/NC2beta/Bdp1	11
GO:0072594	establishment of protein localization to organelle	18/368	296/18885	2.21359e-05	0.000374031	0.000336492	Mtor/Nup75/Gp210/Fs(2)Ket/Pen/Nipped-B/Nup205/Kap-alpha3/Nup154/Nup107/Nup98-96/Nup133/Nup93-2/CG14712/Sec63/Nup153/Nup93-1/Nup160	18
GO:0010628	positive regulation of gene expression	21/368	391/18885	3.00263e-05	0.000500004	0.000449822	Fmr1/IntS8/RpIIIC160/Doa/vtd/mago/DMAP1/Nipped-B/pho/ps/MED26/CG4849/Nup98-96/pnr/omd/pont/CG7483/CG6686/Sf3a2/IntS2/MED23	21
GO:0034968	histone lysine methylation	9/368	84/18885	3.73411e-05	0.000612928	0.000551413	Set2/wds/Su(var)3-9/Set1/Ctr9/trr/Hcf/atms/FRG1	9
GO:0006479	protein methylation	11/368	127/18885	3.92e-05	0.000625567	0.000562784	Kdm2/Set2/wds/Su(var)3-9/Set1/Ctr9/trr/Hcf/LKRSDH/atms/FRG1	11
GO:0008213	protein alkylation	11/368	127/18885	3.92e-05	0.000625567	0.000562784	Kdm2/Set2/wds/Su(var)3-9/Set1/Ctr9/trr/Hcf/LKRSDH/atms/FRG1	11
GO:0061982	meiosis I cell cycle process	14/368	200/18885	3.98254e-05	0.000626841	0.00056393	pds5/Lam/east/vtd/Nipped-B/grau/Nup154/Nup107/Blm/SA/Sec8/Klp67A/Nup93-1/Klp3A	14
GO:0006352	DNA-templated transcription, initiation	11/368	129/18885	4.52892e-05	0.000703207	0.000632632	His4r/Taf4/Taf2/Taf5/Taf6/e(y)1/SF2/Nup98-96/NC2beta/Srp54/Bdp1	11
GO:0006310	DNA recombination	13/368	181/18885	5.74559e-05	0.000880224	0.000791883	rad50/SMC5/vtd/mago/Nipped-B/Nup107/jnj/DNAlig3/Blm/RnpS1/Acn/Klp3A/Nup160	13
GO:0018022	peptidyl-lysine methylation	9/368	90/18885	6.46652e-05	0.000977636	0.000879519	Set2/wds/Su(var)3-9/Set1/Ctr9/trr/Hcf/atms/FRG1	9
GO:0030261	chromosome condensation	10/368	113/18885	7.31535e-05	0.0010916	0.000982047	Cap-G/Mi-2/Orc5/Myb/SMC2/glu/Cap-D2/Mink/barr/MTA1-like	10
GO:0043414	macromolecule methylation	13/368	193/18885	0.000110438	0.00162684	0.00146356	Kdm2/Set2/wds/Su(var)3-9/Set1/Ctr9/trr/Hcf/LKRSDH/atms/FRG1/Flacc/vir	13
GO:0043486	histone exchange	7/368	57/18885	0.00011525	0.00167623	0.001508	rept/Arp6/HipHop/DMAP1/Nipped-A/dom/pont	7
GO:0032259	methylation	13/368	199/18885	0.000150009	0.0021545	0.00193827	Kdm2/Set2/wds/Su(var)3-9/Set1/Ctr9/trr/Hcf/LKRSDH/atms/FRG1/Flacc/vir	13
GO:0010948	negative regulation of cell cycle process	11/368	150/18885	0.000176321	0.00250115	0.00225013	Mtor/pds5/Mi-2/mof/RfC4/14-3-3epsilon/Rbf/Mad1/Chro/Rif1/E2f2	11
GO:0031124	mRNA 3'-end processing	8/368	83/18885	0.000212881	0.00298293	0.00268356	Fmr1/Sym/Cpsf100/Nab2/SF2/Cpsf160/Cpsf73/Srp54	8
GO:0006367	transcription initiation from RNA polymerase II promoter	9/368	109/18885	0.00028247	0.00391034	0.00351789	Taf4/Taf2/Taf5/Taf6/e(y)1/SF2/Nup98-96/NC2beta/Srp54	9
GO:0014070	response to organic cyclic compound	13/368	215/18885	0.000319933	0.00437623	0.00393703	Set2/E(bx)/rept/Iswi/trr/BRWD3/jnj/Nup98-96/LKRSDH/pzg/l(3)psg2/CTCF/MED24	13
GO:1901987	regulation of cell cycle phase transition	13/368	219/18885	0.00038189	0.00516226	0.00464416	Mtor/Dhc64C/mof/RfC4/14-3-3epsilon/Rbf/Myb/Mad1/Chro/Cdc27/Mfap1/Rif1/E2f2	13
GO:0043631	RNA polyadenylation	6/368	50/18885	0.00040513	0.00541273	0.00486949	Fmr1/Sym/Cpsf100/Nab2/Cpsf160/Cpsf73	6
GO:0036315	cellular response to sterol	6/368	54/18885	0.000616842	0.0079635	0.00716427	Set2/E(bx)/Iswi/Nup98-96/LKRSDH/pzg	6
GO:0071390	cellular response to ecdysone	6/368	54/18885	0.000616842	0.0079635	0.00716427	Set2/E(bx)/Iswi/Nup98-96/LKRSDH/pzg	6
GO:1901655	cellular response to ketone	6/368	54/18885	0.000616842	0.0079635	0.00716427	Set2/E(bx)/Iswi/Nup98-96/LKRSDH/pzg	6
GO:0006302	double-strand break repair	11/368	174/18885	0.000629248	0.0080334	0.00722715	rad50/SMC5/vtd/Nipped-B/Nup107/jnj/DNAlig3/Blm/gkt/Arp8/Nup160	11
GO:0045786	negative regulation of cell cycle	11/368	175/18885	0.000660009	0.00833353	0.00749716	Mtor/pds5/Mi-2/mof/RfC4/14-3-3epsilon/Rbf/Mad1/Chro/Rif1/E2f2	11
GO:1901988	negative regulation of cell cycle phase transition	9/368	123/18885	0.000687465	0.00858584	0.00772415	Mtor/mof/RfC4/14-3-3epsilon/Rbf/Mad1/Chro/Rif1/E2f2	9
GO:0007346	regulation of mitotic cell cycle	15/368	297/18885	0.00076892	0.00949988	0.00854646	Mtor/Fmr1/Dhc64C/14-3-3epsilon/Rbf/Myb/Mad1/Chro/l(3)mbt/pzg/Cdc27/Mfap1/Klp3A/Rif1/E2f2	15
GO:0010564	regulation of cell cycle process	18/368	402/18885	0.000973322	0.0118973	0.0107033	Mtor/pds5/Lam/Dhc64C/Mi-2/mof/east/RfC4/14-3-3epsilon/Rbf/Myb/Mad1/Chro/Cdc27/Mfap1/Klp3A/Rif1/E2f2	18
GO:0070192	chromosome organization involved in meiotic cell cycle	8/368	105/18885	0.00103973	0.0125752	0.0113131	rad50/pds5/vtd/Nipped-B/Nup154/Cap-D2/SA/Nup93-1	8
GO:0033044	regulation of chromosome organization	9/368	131/18885	0.00107852	0.0129086	0.0116131	Mtor/pds5/Dhc64C/Mi-2/Rbf/Mad1/Chro/Cdc27/Ulp1	9
GO:0007088	regulation of mitotic nuclear division	7/368	82/18885	0.0010941	0.01296	0.0116593	Mtor/14-3-3epsilon/Myb/Mad1/Chro/Cdc27/Klp3A	7
GO:0007127	meiosis I	8/368	108/18885	0.00124836	0.0146364	0.0131675	east/vtd/Nipped-B/grau/Blm/SA/Klp67A/Klp3A	8
GO:0007051	spindle organization	14/368	283/18885	0.00138768	0.0161056	0.0144892	Mtor/Pp2A-29B/Lam/Dhc64C/Klp61F/Orc5/Myb/Chro/Nup154/pont/Sec8/Klp67A/Klp3A/Eb1	14
GO:1901990	regulation of mitotic cell cycle phase transition	10/368	166/18885	0.00158037	0.0181584	0.016336	Mtor/Dhc64C/Rbf/Myb/Mad1/Chro/Cdc27/Mfap1/Rif1/E2f2	10
GO:0051783	regulation of nuclear division	7/368	88/18885	0.00165444	0.0188213	0.0169324	Mtor/14-3-3epsilon/Myb/Mad1/Chro/Cdc27/Klp3A	7
GO:0071396	cellular response to lipid	6/368	67/18885	0.00192908	0.0217305	0.0195496	Set2/E(bx)/Iswi/Nup98-96/LKRSDH/pzg	6
GO:0031497	chromatin assembly	11/368	201/18885	0.00202262	0.022563	0.0202985	His4r/Fmr1/Lam/rept/His3:CG31613/Su(var)3-9/Iswi/HipHop/pho/Acf/Ulp1	11
GO:0070828	heterochromatin organization	10/368	173/18885	0.00214462	0.0236939	0.021316	Fmr1/Lam/rept/Arp6/Su(var)3-9/pho/Acf/stwl/FRG1/Ulp1	10
GO:0097306	cellular response to alcohol	6/368	71/18885	0.00259457	0.0283921	0.0255426	Set2/E(bx)/Iswi/Nup98-96/LKRSDH/pzg	6
GO:0007052	mitotic spindle organization	9/368	150/18885	0.00274542	0.0296288	0.0266552	Mtor/Dhc64C/Klp61F/Orc5/Chro/pont/Klp67A/Klp3A/Eb1	9
GO:0006354	DNA-templated transcription, elongation	6/368	72/18885	0.00278496	0.0296288	0.0266552	fs(1)h/Nelf-E/dre4/atms/Hpr1/NELF-B	6
GO:1901991	negative regulation of mitotic cell cycle phase transition	6/368	72/18885	0.00278496	0.0296288	0.0266552	Mtor/Rbf/Mad1/Chro/Rif1/E2f2	6
GO:0044770	cell cycle phase transition	13/368	275/18885	0.00301201	0.0317505	0.028564	Mtor/Dhc64C/mof/RfC4/14-3-3epsilon/Rbf/Myb/Mad1/Chro/Cdc27/Mfap1/Rif1/E2f2	13
GO:0002181	cytoplasmic translation	11/368	212/18885	0.00305571	0.0319182	0.0287149	RpL15/RpS27A/RpL19/RpL21/RpL6/RpL36A/eIF3a/RpL13A/MCTS1/RpL7/RpL24	11
GO:0051052	regulation of DNA metabolic process	8/368	125/18885	0.00313943	0.0324974	0.0292359	Tet/mago/Rbf/Blm/RnpS1/Acn/Rif1/E2f2	8
GO:0032784	regulation of DNA-templated transcription, elongation	5/368	52/18885	0.00335385	0.0344069	0.0309537	fs(1)h/Nelf-E/dre4/Hpr1/NELF-B	5
GO:0051304	chromosome separation	7/368	100/18885	0.0034229	0.0348046	0.0313115	Mtor/Dhc64C/Mad1/Chro/glu/barr/Cdc27	7
GO:1903046	meiotic cell cycle process	16/368	381/18885	0.00345514	0.0348242	0.0313292	rad50/pds5/Lam/east/vtd/Nipped-B/grau/Nup154/Nup107/Cap-D2/Blm/SA/Sec8/Klp67A/Nup93-1/Klp3A	16
GO:0090501	RNA phosphodiester bond hydrolysis	5/368	55/18885	0.00428146	0.0427774	0.0384842	rnh1/CG8414/Cpsf100/Cpsf160/CG7728	5
GO:0051306	mitotic sister chromatid separation	6/368	79/18885	0.00442427	0.0434486	0.039088	Mtor/Dhc64C/Mad1/Chro/barr/Cdc27	6
GO:0051983	regulation of chromosome segregation	6/368	79/18885	0.00442427	0.0434486	0.039088	Mtor/Dhc64C/Rbf/Mad1/Chro/Cdc27	6
GO:0051225	spindle assembly	8/368	133/18885	0.00457719	0.0445695	0.0400964	Mtor/Pp2A-29B/Lam/Klp61F/Nup154/pont/Klp67A/Eb1	8
GO:0034605	cellular response to heat	5/368	56/18885	0.00462763	0.0446819	0.0401975	RpII33/Gp93/Nup98-96/Hpr1/tho2	5
GO:0006997	nucleus organization	9/368	163/18885	0.00475431	0.0455225	0.0409538	Nup188/Gp210/Lam/Iswi/Nup205/LBR/Nup93-2/Nup153/Nup93-1	9

## Sheet: H3K9me3_H3K4me3_vs_H3K9me3
ID	Description	GeneRatio	BgRatio	pvalue	p.adjust	qvalue	geneID	Count
GO:0042254	ribosome biogenesis	34/378	283/18885	4.42494e-17	5.70817e-14	5.18417e-14	Ran/hoip/RpS19a/RpL10/Rtc1/P32/CG12909/Nopp140/CG4038/Pop1/Rrp40/Sas10/wcd/RpS27/CG7006/CG6937/ppan/Surf6/RpL7-like/CG9107/CG11030/mbm/Nle/RpL26/Rrp47/RpL23A/CG3735/Fib/CG32708/Rbm13/CG1789/CG3527/CG3071/CG14805	34
GO:0034660	ncRNA metabolic process	43/378	500/18885	7.17571e-16	3.42678e-13	3.11221e-13	scu/Rtc1/Rpb5/CG12909/AspRS/Nopp140/CG4038/Trf4-1/Pop1/Rrp40/LysRS/Sas10/Cbp20/wcd/IntS12/Rpb10/CG6937/ppan/CG18600/Rrp46/Tailor/RtcB/CG6388/RpL7-like/Nfs1/CG9107/CG11030/CG3756/Rpb8/CG14618/AGO2/TrpRS-m/Mtr3/Rrp47/Dis3l2/CG3735/Fib/CG32708/Rbm13/CG1789/CG3527/CG3071/CG14805	43
GO:0022613	ribonucleoprotein complex biogenesis	39/378	413/18885	7.96926e-16	3.42678e-13	3.11221e-13	Ran/hoip/RpS19a/RpL10/eIF2beta/Rtc1/P32/CG12909/CG1646/Nopp140/CG4038/Pop1/Rrp40/Sas10/wcd/RpS27/CG7006/CG6937/ppan/Surf6/RpL7-like/SmE/CG9107/CG11030/mbm/Nle/AGO2/RpL26/Rrp47/RpL23A/CG3735/Fib/CG32708/Rbm13/CG1789/CG3527/CG3071/CG14805/eIF4H1	39
GO:0002181	cytoplasmic translation	27/378	212/18885	1.97966e-14	6.38441e-12	5.79833e-12	CNBP/CG8635/RpS23/eIF2Bgamma/RpS15Aa/RpS19a/RpS10b/RpS2/RpLP1/RpS26/RpL10/128up/eIF2beta/RpS25/RpS20/lark/RpL8/larp/RpS27/RpL30/RpL7-like/RpL26/RpL23A/RpL12/RpS13/eIF4H1/RpL9	27
GO:0034470	ncRNA processing	33/378	355/18885	2.31699e-13	5.97783e-11	5.42907e-11	scu/Rtc1/CG12909/Nopp140/CG4038/Pop1/Rrp40/Sas10/Cbp20/wcd/IntS12/CG6937/ppan/Rrp46/Tailor/RtcB/CG6388/RpL7-like/Nfs1/CG9107/CG11030/CG14618/AGO2/Mtr3/Rrp47/CG3735/Fib/CG32708/Rbm13/CG1789/CG3527/CG3071/CG14805	33
GO:0016072	rRNA metabolic process	25/378	212/18885	1.09415e-12	2.35243e-10	2.13648e-10	Rtc1/CG12909/Nopp140/CG4038/Pop1/Rrp40/Sas10/wcd/CG6937/ppan/CG18600/Rrp46/RpL7-like/CG9107/CG11030/Mtr3/Rrp47/CG3735/Fib/CG32708/Rbm13/CG1789/CG3527/CG3071/CG14805	25
GO:0006364	rRNA processing	22/378	187/18885	2.68916e-11	4.95573e-09	4.5008e-09	Rtc1/CG12909/Nopp140/CG4038/Pop1/Rrp40/Sas10/wcd/CG6937/ppan/RpL7-like/CG9107/CG11030/Rrp47/CG3735/Fib/CG32708/Rbm13/CG1789/CG3527/CG3071/CG14805	22
GO:1903311	regulation of mRNA metabolic process	30/378	362/18885	5.33795e-11	8.60744e-09	7.81728e-09	Fmr1/sqd/Psi/HnRNP-K/Hrb98DE/Hrb27C/how/U2af50/U2af38/x16/snRNP-U1-70K/qkr58E-3/Pep/Rbp1/Rsf1/nito/CG1646/Saf-B/Rrp40/CG14641/CG17454/SC35/Ythdf/Patr-1/rump/DCP1/qkr58E-2/qkr58E-1/mbf1/Upf1	30
GO:0010608	post-transcriptional regulation of gene expression	31/378	443/18885	1.66544e-09	2.38713e-07	2.168e-07	CNBP/Fmr1/sqd/Lis-1/CG8963/Syp/Hrb98DE/hoip/Hrb27C/how/tyf/eIF4G1/fs(1)K10/CG5726/Rrp40/Atx2/lark/Larp4B/Cbp20/larp/PQBP1/Ythdf/Patr-1/rump/Tailor/AGO2/HBS1/DCP1/eIF3k/CG1677/mbf1	31
GO:0048024	regulation of mRNA splicing, via spliceosome	22/378	240/18885	3.31785e-09	4.28003e-07	3.88712e-07	sqd/Psi/HnRNP-K/Hrb98DE/Hrb27C/how/U2af50/U2af38/x16/snRNP-U1-70K/qkr58E-3/Pep/Rbp1/Rsf1/nito/CG1646/Saf-B/CG14641/CG17454/SC35/qkr58E-2/qkr58E-1	22
GO:0043484	regulation of RNA splicing	23/378	266/18885	4.47823e-09	5.25174e-07	4.76964e-07	sqd/Psi/HnRNP-K/Hrb98DE/Hrb27C/how/U2af50/U2af38/x16/snRNP-U1-70K/qkr58E-3/Pep/Rbp1/Rsf1/nito/CG1646/Saf-B/CG14641/CG17454/SC35/TBPH/qkr58E-2/qkr58E-1	23
GO:0050684	regulation of mRNA processing	23/378	268/18885	5.16822e-09	5.55583e-07	5.04581e-07	Fmr1/sqd/Psi/HnRNP-K/Hrb98DE/Hrb27C/how/U2af50/U2af38/x16/snRNP-U1-70K/qkr58E-3/Pep/Rbp1/Rsf1/nito/CG1646/Saf-B/CG14641/CG17454/SC35/qkr58E-2/qkr58E-1	23
GO:0000380	alternative mRNA splicing, via spliceosome	21/378	234/18885	1.10598e-08	1.05197e-06	9.55403e-07	sqd/Psi/HnRNP-K/Hrb98DE/how/U2af50/U2af38/x16/snRNP-U1-70K/qkr58E-3/Rbp1/Rsf1/nito/CG1646/Saf-B/CG14641/CG17454/SC35/PQBP1/qkr58E-2/qkr58E-1	21
GO:0006401	RNA catabolic process	19/378	192/18885	1.14168e-08	1.05197e-06	9.55403e-07	Fmr1/sqd/Rat1/Trf4-1/LSm3/Rrp40/DIP1/Ythdf/Patr-1/Rrp46/rump/Tailor/Edc3/Mtr3/Dis3l2/DCP1/CG1677/mbf1/Upf1	19
GO:0006413	translational initiation	15/378	123/18885	2.47944e-08	2.13232e-06	1.93657e-06	CNBP/CG8963/NAT1/eIF2Bgamma/eIF4E1/eIF4G1/eIF2Bbeta/eIF2beta/eIF2Bdelta/CG5726/eIF3f1/eIF3l/eIF3k/eIF3g1/eIF4H1	15
GO:0000381	regulation of alternative mRNA splicing, via spliceosome	20/378	228/18885	3.64328e-08	2.9374e-06	2.66774e-06	sqd/Psi/HnRNP-K/Hrb98DE/how/U2af50/U2af38/x16/snRNP-U1-70K/qkr58E-3/Rbp1/Rsf1/nito/CG1646/Saf-B/CG14641/CG17454/SC35/qkr58E-2/qkr58E-1	20
GO:0031123	RNA 3'-end processing	15/378	129/18885	4.74306e-08	3.59915e-06	3.26875e-06	Fmr1/x16/Rbp1/Rsf1/FLASH/Trf4-1/Rrp40/SC35/IntS12/CstF64/Rrp46/Tailor/CG15160/Mtr3/Fib	15
GO:2000112	regulation of cellular macromolecule biosynthetic process	25/378	363/18885	8.99978e-08	6.44984e-06	5.85775e-06	CNBP/Fmr1/sqd/Lis-1/CG8963/Syp/Hrb98DE/hoip/Hrb27C/how/tyf/Rack1/eIF4G1/fs(1)K10/CG5726/Rrp40/Atx2/lark/Larp4B/larp/PQBP1/Ythdf/Patr-1/DCP1/eIF3k	25
GO:0006417	regulation of translation	24/378	344/18885	1.2883e-07	8.74688e-06	7.94392e-06	CNBP/Fmr1/sqd/Lis-1/CG8963/Syp/Hrb98DE/hoip/Hrb27C/how/tyf/eIF4G1/fs(1)K10/CG5726/Rrp40/Atx2/lark/Larp4B/larp/PQBP1/Ythdf/Patr-1/DCP1/eIF3k	24
GO:0042255	ribosome assembly	10/378	61/18885	3.3322e-07	2.14927e-05	1.95197e-05	RpS19a/RpL10/P32/RpS27/CG7006/ppan/CG9107/Nle/RpL23A/CG32708	10
GO:0006402	mRNA catabolic process	15/378	157/18885	6.35408e-07	3.90322e-05	3.54491e-05	Fmr1/sqd/Rat1/LSm3/Rrp40/Ythdf/Patr-1/Rrp46/rump/Edc3/Mtr3/Dis3l2/DCP1/mbf1/Upf1	15
GO:0042273	ribosomal large subunit biogenesis	10/378	72/18885	1.62963e-06	9.55555e-05	8.67836e-05	RpL10/CG7006/CG6937/ppan/Surf6/RpL7-like/Nle/RpL26/RpL23A/Rbm13	10
GO:0034655	nucleobase-containing compound catabolic process	19/378	269/18885	2.22881e-06	0.000125007	0.000113532	Fmr1/sqd/Rat1/Trf4-1/LSm3/Rrp40/DIP1/Ythdf/Patr-1/Rrp46/rump/Tailor/Edc3/Mtr3/Dis3l2/DCP1/CG1677/mbf1/Upf1	19
GO:0006325	chromatin organization	27/378	496/18885	2.83285e-06	0.000152265	0.000138288	Fmr1/Nlp/Act87E/Caf1-105/ADD1/Tlk/Chd1/JIL-1/Spt6/Su(var)205/His1:CG33861/P32/CG7137/osa/CG5815/vig/Spt5/cid/Nph/aurB/AGO2/Bap60/scf/Nap1/Bap111/MRG15/Act5C	27
GO:0045727	positive regulation of translation	10/378	78/18885	3.4379e-06	0.000177396	0.000161111	CNBP/Fmr1/Hrb98DE/hoip/Hrb27C/tyf/lark/Larp4B/larp/PQBP1	10
GO:0046700	heterocycle catabolic process	19/378	286/18885	5.45175e-06	0.00027049	0.00024566	Fmr1/sqd/Rat1/Trf4-1/LSm3/Rrp40/DIP1/Ythdf/Patr-1/Rrp46/rump/Tailor/Edc3/Mtr3/Dis3l2/DCP1/CG1677/mbf1/Upf1	19
GO:0044270	cellular nitrogen compound catabolic process	19/378	287/18885	5.73297e-06	0.000273909	0.000248764	Fmr1/sqd/Rat1/Trf4-1/LSm3/Rrp40/DIP1/Ythdf/Patr-1/Rrp46/rump/Tailor/Edc3/Mtr3/Dis3l2/DCP1/CG1677/mbf1/Upf1	19
GO:0042274	ribosomal small subunit biogenesis	10/378	83/18885	6.08157e-06	0.000280186	0.000254466	RpS19a/Sas10/RpS27/Surf6/CG9107/CG11030/mbm/CG3735/CG32708/CG3071	10
GO:0006399	tRNA metabolic process	15/378	189/18885	6.48862e-06	0.000283306	0.000257298	scu/Rpb5/AspRS/Pop1/Rrp40/LysRS/Rpb10/RtcB/CG6388/Nfs1/CG3756/Rpb8/CG14618/TrpRS-m/Dis3l2	15
GO:0034248	regulation of cellular amide metabolic process	25/378	459/18885	6.58851e-06	0.000283306	0.000257298	CNBP/Fmr1/sqd/Lis-1/CG8963/Syp/Hrb98DE/hoip/Hrb27C/how/tyf/Spt6/eIF4G1/fs(1)K10/CG5726/Rrp40/Atx2/lark/Larp4B/larp/PQBP1/Ythdf/Patr-1/DCP1/eIF3k	25
GO:0019439	aromatic compound catabolic process	19/378	299/18885	1.02897e-05	0.000428186	0.000388879	Fmr1/sqd/Rat1/Trf4-1/LSm3/Rrp40/DIP1/Ythdf/Patr-1/Rrp46/rump/Tailor/Edc3/Mtr3/Dis3l2/DCP1/CG1677/mbf1/Upf1	19
GO:1901361	organic cyclic compound catabolic process	19/378	309/18885	1.63401e-05	0.000658711	0.000598241	Fmr1/sqd/Rat1/Trf4-1/LSm3/Rrp40/DIP1/Ythdf/Patr-1/Rrp46/rump/Tailor/Edc3/Mtr3/Dis3l2/DCP1/CG1677/mbf1/Upf1	19
GO:0006997	nucleus organization	13/378	163/18885	2.53682e-05	0.000991667	0.000900632	tacc/Nlp/Ran/Msp300/Chd1/Ote/P32/CG7137/sle/Nph/Dd/Nup35/Nap1	13
GO:0031124	mRNA 3'-end processing	9/378	83/18885	4.17762e-05	0.00158504	0.00143953	Fmr1/x16/Rbp1/Rsf1/FLASH/SC35/CstF64/Tailor/CG15160	9
GO:0071824	protein-DNA complex subunit organization	13/378	175/18885	5.33146e-05	0.00196502	0.00178464	Act87E/Caf1-105/Chd1/Spt6/Su(var)205/His1:CG33861/P32/CG5815/cid/CG18600/Cenp-C/Nap1/MRG15	13
GO:0031497	chromatin assembly	14/378	201/18885	5.61732e-05	0.00201287	0.00182809	Fmr1/Caf1-105/ADD1/JIL-1/Su(var)205/His1:CG33861/P32/CG7137/CG5815/cid/AGO2/Bap60/Nap1/MRG15	14
GO:0006338	chromatin remodeling	15/378	229/18885	6.21289e-05	0.00211162	0.00191777	Nlp/Act87E/Caf1-105/Chd1/Spt6/Su(var)205/His1:CG33861/P32/osa/CG5815/Nph/Nap1/Bap111/MRG15/Act5C	15
GO:0000956	nuclear-transcribed mRNA catabolic process	10/378	108/18885	6.22026e-05	0.00211162	0.00191777	sqd/Rat1/LSm3/Rrp40/Patr-1/Rrp46/Edc3/Mtr3/DCP1/Upf1	10
GO:0090305	nucleic acid phosphodiester bond hydrolysis	9/378	90/18885	7.93932e-05	0.00262608	0.00238501	RpII15/Rtc1/Pop1/Rrp40/RpI12/CstF64/Edc3/DCP1/CG32708	9
GO:0034728	nucleosome organization	9/378	92/18885	9.42975e-05	0.0030411	0.00276192	Act87E/Caf1-105/Chd1/Spt6/His1:CG33861/P32/CG5815/Nap1/MRG15	9
GO:0022618	ribonucleoprotein complex assembly	13/378	187/18885	0.000104936	0.00328633	0.00298464	RpS19a/RpL10/eIF2beta/CG1646/RpS27/ppan/SmE/CG9107/Nle/AGO2/RpL23A/CG32708/eIF4H1	13
GO:0090501	RNA phosphodiester bond hydrolysis	7/378	55/18885	0.000108067	0.00328633	0.00298464	RpII15/Rtc1/Pop1/Rrp40/RpI12/CstF64/CG32708	7
GO:0007346	regulation of mitotic cell cycle	17/378	297/18885	0.000109544	0.00328633	0.00298464	Fmr1/Lis-1/Abi/Ran/Capr/crol/crol/Cdk1/Rcc1/Nup44A/REG/Bub3/aurB/mad2/Smr/Rae1/CHES-1-like	17
GO:0019094	pole plasm mRNA localization	11/378	141/18885	0.000128784	0.00373672	0.00339369	sqd/Hrb27C/chic/enc/fs(1)K10/DCTN2-p50/par-1/btz/rump/DCP1/Chc	11
GO:0010628	positive regulation of gene expression	20/378	391/18885	0.000130351	0.00373672	0.00339369	CNBP/Fmr1/Hrb98DE/hoip/Hrb27C/tyf/FoxK/Spt6/nito/Atx2/lark/Larp4B/larp/PQBP1/rin/RtcB/Bap60/Rae1/mbf1/MRG15	20
GO:0071826	ribonucleoprotein complex subunit organization	13/378	192/18885	0.000136758	0.00383518	0.00348311	RpS19a/RpL10/eIF2beta/CG1646/RpS27/ppan/SmE/CG9107/Nle/AGO2/RpL23A/CG32708/eIF4H1	13
GO:0007316	pole plasm RNA localization	11/378	143/18885	0.000145959	0.0040061	0.00363834	sqd/Hrb27C/chic/enc/fs(1)K10/DCTN2-p50/par-1/btz/rump/DCP1/Chc	11
GO:0007349	cellularization	16/378	295/18885	0.000318117	0.00854939	0.00776457	tacc/Fmr1/RhoGEF2/CLIP-190/Capr/sw/Sep1/Sep2/gish/Past1/blanks/AGO2/Ack/HBS1/Chc/Act5C	16
GO:0032270	positive regulation of cellular protein metabolic process	20/378	422/18885	0.000354236	0.00930528	0.00845106	CNBP/Fmr1/Abi/dco/Hrb98DE/hoip/Hrb27C/tyf/Dap160/Rack1/Su(var)205/dod/Incenp/lark/Larp4B/REG/Jafrac2/larp/PQBP1/MRG15	20
GO:0060811	intracellular mRNA localization involved in anterior/posterior axis specification	11/378	159/18885	0.00036762	0.00930528	0.00845106	sqd/Hrb27C/chic/enc/fs(1)K10/DCTN2-p50/par-1/btz/rump/DCP1/Chc	11
GO:0065004	protein-DNA complex assembly	9/378	110/18885	0.000367883	0.00930528	0.00845106	Caf1-105/Su(var)205/His1:CG33861/P32/CG5815/cid/CG18600/Cenp-C/Nap1	9
GO:0045451	pole plasm oskar mRNA localization	10/378	135/18885	0.000393032	0.00975023	0.00885516	sqd/Hrb27C/chic/enc/DCTN2-p50/par-1/btz/rump/DCP1/Chc	10
GO:0034250	positive regulation of cellular amide metabolic process	11/378	164/18885	0.000478277	0.0116411	0.0105724	CNBP/Fmr1/Hrb98DE/hoip/Hrb27C/tyf/Spt6/lark/Larp4B/larp/PQBP1	11
GO:0007300	ovarian nurse cell to oocyte transport	8/378	92/18885	0.000515379	0.0123118	0.0111816	Lis-1/hts/Msp300/chic/ena/lark/loco/SCAR	8
GO:0060810	intracellular mRNA localization involved in pattern specification process	11/378	168/18885	0.000585736	0.0135141	0.0122735	sqd/Hrb27C/chic/enc/fs(1)K10/DCTN2-p50/par-1/btz/rump/DCP1/Chc	11
GO:0006354	DNA-templated transcription, elongation	7/378	72/18885	0.00058666	0.0135141	0.0122735	RpII15/Spt6/CycT/CycK/Spt5/CG18600/Usp10	7
GO:0006403	RNA localization	17/378	354/18885	0.000834952	0.0188963	0.0171616	Fmr1/sqd/Lis-1/Hrb27C/chic/U2af50/enc/fs(1)K10/DCTN2-p50/Tom20/par-1/btz/rump/AGO2/DCP1/Rae1/Chc	17
GO:0008298	intracellular mRNA localization	12/378	205/18885	0.000906081	0.0201525	0.0183025	sqd/Lis-1/Hrb27C/chic/enc/fs(1)K10/DCTN2-p50/par-1/btz/rump/DCP1/Chc	12
GO:0061013	regulation of mRNA catabolic process	8/378	101/18885	0.000958038	0.0209469	0.019024	Fmr1/Rrp40/Ythdf/Patr-1/rump/DCP1/mbf1/Upf1	8
GO:1903313	positive regulation of mRNA metabolic process	7/378	79/18885	0.00102467	0.0220304	0.020008	Hrb98DE/Hrb27C/Rrp40/Ythdf/Patr-1/DCP1/Upf1	7
GO:0043487	regulation of RNA stability	8/378	106/18885	0.00131168	0.0277388	0.0251924	Fmr1/Rrp40/Ythdf/Patr-1/rump/DCP1/CG1677/mbf1	8
GO:0051247	positive regulation of protein metabolic process	20/378	473/18885	0.00144659	0.0300984	0.0273354	CNBP/Fmr1/Abi/dco/Hrb98DE/hoip/Hrb27C/tyf/Dap160/Rack1/Su(var)205/dod/Incenp/lark/Larp4B/REG/Jafrac2/larp/PQBP1/MRG15	20
GO:0007028	cytoplasm organization	12/378	217/18885	0.00147658	0.0302347	0.0274592	sqd/Lis-1/Hrb27C/chic/enc/fs(1)K10/DCTN2-p50/par-1/btz/rump/DCP1/Chc	12
GO:0009994	oocyte differentiation	19/378	444/18885	0.00164665	0.0331902	0.0301434	Fmr1/sqd/Lis-1/hts/Syp/Hrb27C/chic/enc/fs(1)K10/DCTN2-p50/Atx2/bai/par-1/btz/loco/rump/DCP1/cpa/Chc	19
GO:0007315	pole plasm assembly	11/378	197/18885	0.00212841	0.0422408	0.0383631	sqd/Hrb27C/chic/enc/fs(1)K10/DCTN2-p50/par-1/btz/rump/DCP1/Chc	11
GO:0007338	single fertilization	6/378	68/18885	0.00238017	0.0458271	0.0416202	tacc/Nlp/Chd1/P32/Nph/Nap1	6
GO:0071456	cellular response to hypoxia	6/378	68/18885	0.00238017	0.0458271	0.0416202	l(2)37Cc/eIF2Bgamma/eIF2Bbeta/SH3PX1/CHES-1-like/Upf1	6
GO:0007309	oocyte axis specification	16/378	358/18885	0.00244068	0.0463011	0.0420507	Fmr1/sqd/Lis-1/Syp/Hrb27C/chic/enc/fs(1)K10/DCTN2-p50/bai/par-1/btz/loco/rump/DCP1/Chc	16
GO:0070828	heterochromatin organization	10/378	173/18885	0.0026028	0.048661	0.044194	Fmr1/ADD1/JIL-1/Su(var)205/CG7137/vig/cid/AGO2/Bap60/MRG15	10

## Sheet: H4K16Ac_H4K16Ac_vs_H3K4me3
ID	Description	GeneRatio	BgRatio	pvalue	p.adjust	qvalue	geneID	Count

## Sheet: H3K4me3_H4K16Ac_vs_H3K4me3
ID	Description	GeneRatio	BgRatio	pvalue	p.adjust	qvalue	geneID	Count
GO:0006325	chromatin organization	6/19	496/18885	6.45873e-06	0.000436506	0.000372835	Nipped-A/dom/polybromo/pzg/Gcn5/ocm	6
GO:0016573	histone acetylation	4/19	144/18885	1.14963e-05	0.000436506	0.000372835	e(y)1/Nipped-A/dom/Gcn5	4
GO:0006475	internal protein amino acid acetylation	4/19	147/18885	1.24716e-05	0.000436506	0.000372835	e(y)1/Nipped-A/dom/Gcn5	4
GO:0018393	internal peptidyl-lysine acetylation	4/19	147/18885	1.24716e-05	0.000436506	0.000372835	e(y)1/Nipped-A/dom/Gcn5	4
GO:0018394	peptidyl-lysine acetylation	4/19	147/18885	1.24716e-05	0.000436506	0.000372835	e(y)1/Nipped-A/dom/Gcn5	4
GO:0006473	protein acetylation	4/19	157/18885	1.6167e-05	0.000471538	0.000402758	e(y)1/Nipped-A/dom/Gcn5	4
GO:0043543	protein acylation	4/19	204/18885	4.51244e-05	0.00112811	0.000963558	e(y)1/Nipped-A/dom/Gcn5	4
GO:0006338	chromatin remodeling	4/19	229/18885	7.0748e-05	0.00154761	0.00132187	Nipped-A/dom/polybromo/Gcn5	4
GO:0018205	peptidyl-lysine modification	4/19	283/18885	0.000160227	0.00311553	0.00266108	e(y)1/Nipped-A/dom/Gcn5	4
GO:0006281	DNA repair	4/19	304/18885	0.000210814	0.00368925	0.00315112	rad50/SMC5/Nipped-A/gkt	4
GO:0031123	RNA 3'-end processing	3/19	129/18885	0.000278521	0.00443102	0.00378469	IntS8/Sym/Rrp4	3
GO:0016570	histone modification	4/19	345/18885	0.00034145	0.00497948	0.00425315	e(y)1/Nipped-A/dom/Gcn5	4
GO:0006974	cellular response to DNA damage stimulus	4/19	378/18885	0.000482521	0.00649547	0.00554801	rad50/SMC5/Nipped-A/gkt	4
GO:0006302	double-strand break repair	3/19	174/18885	0.000668277	0.00792751	0.00677117	rad50/SMC5/gkt	3
GO:0071824	protein-DNA complex subunit organization	3/19	175/18885	0.000679501	0.00792751	0.00677117	e(y)1/Nipped-A/dom	3
GO:0030097	hemopoiesis	3/19	183/18885	0.000773658	0.00846189	0.0072276	dom/ocm/mxc	3
GO:0002520	immune system development	3/19	214/18885	0.00121596	0.0118219	0.0100975	dom/ocm/mxc	3
GO:0048534	hematopoietic or lymphoid organ development	3/19	214/18885	0.00121596	0.0118219	0.0100975	dom/ocm/mxc	3
GO:0043486	histone exchange	2/19	57/18885	0.00148089	0.0136397	0.0116502	Nipped-A/dom	2
GO:0090305	nucleic acid phosphodiester bond hydrolysis	2/19	90/18885	0.00364342	0.031696	0.0270727	rad50/Rrp4	2
GO:0034728	nucleosome organization	2/19	92/18885	0.00380352	0.031696	0.0270727	Nipped-A/dom	2
GO:1903311	regulation of mRNA metabolic process	3/19	362/18885	0.0053885	0.042863	0.0366108	dom/obe/Rrp4	3
GO:0035172	hemocyte proliferation	2/19	114/18885	0.00577596	0.0439476	0.0375372	dom/mxc	2
