# Supplementary material for: The role of RNA in the maintenance of chromatin domains as revealed by antibody-mediated proximity labelling coupled to mass spectrometry
Source: eLife. 2024 May 8;13:e95718. doi: 10.7554/eLife.95718 (PMC11147508; doi:10.7554/eLife.95718)
Supplement: Supplementary file 9. [file elife-95718-supp9.xlsx]

## Sheet: CID_RNase_vs_CID_Exp
name	Uniprot	symbol	imputed	num_NAs	CID_RNase_vs_CID_Exp.CID_RNase_vs_CID_Exp.logFC	CID_RNase_vs_CID_Exp.CID_RNase_vs_CID_Exp.CI.L	CID_RNase_vs_CID_Exp.CID_RNase_vs_CID_Exp.CI.R	CID_RNase_vs_CID_Exp.CID_RNase_vs_CID_Exp.AveExpr	CID_RNase_vs_CID_Exp.CID_RNase_vs_CID_Exp.t	CID_RNase_vs_CID_Exp.CID_RNase_vs_CID_Exp.P.Value	CID_RNase_vs_CID_Exp.CID_RNase_vs_CID_Exp.adj.P.Val	CID_RNase_vs_CID_Exp.CID_RNase_vs_CID_Exp.B	CID_RNase_vs_CID_Exp.CID_RNase_vs_CID_Exp.q.val	CID_RNase_vs_CID_Exp.CID_RNase_vs_CID_Exp.SEM
A0A0B4JCV4	A0A0B4JCV4	tacc	TRUE	1	-0.593859	-1.19962	0.011905	25.2077	-2.68208	0.0529354	0.106852	-5.45121	0.0223805	0.221417
A0A0B4JD24	A0A0B4JD24	CG17002	TRUE	2	-0.543927	-1.00223	-0.0856251	24.0441	-3.24699	0.0297679	0.0693778	-4.78668	0.0145313	0.167518
A0A0B4K6K9	A0A0B4K6K9	larp	FALSE	0	0.391038	0.0590037	0.723073	27.6742	3.22202	0.0305014	0.0693778	-4.81506	0.0145313	0.121364
A0A0B4KHD9	A0A0B4KHD9	CG5746	TRUE	3	-3.6636	-4.20591	-3.12129	25.6375	-18.482	3.78999e-05	0.000818639	3.15244	0.000171466	0.198225
A0A0B4KI59	A0A0B4KI59	CG7903	FALSE	0	0.227991	-0.0615401	0.517522	25.5632	2.15434	0.0949334	0.161461	-6.10632	0.0338185	0.105829
A0A0B4LGT9	A0A0B4LGT9	CG9667	TRUE	3	0.206187	-0.178241	0.590616	23.7684	1.46737	0.213588	0.290157	-6.96173	0.0607741	0.140515
A0A0B4LGX0	A0A0B4LGX0	Cenp-C	FALSE	0	-0.533224	-0.910988	-0.15546	26.5935	-3.86172	0.0168633	0.0438852	-4.11844	0.00919187	0.138079
A0A126GUZ1	A0A126GUZ1	pre-mod(mdg4)-V	FALSE	0	0.286598	-0.0143345	0.587531	27.021	2.60553	0.057461	0.110818	-5.54457	0.023211	0.109996
A1Z6Q0	A1Z6Q0	koi	FALSE	0	-0.504154	-0.804204	-0.204104	27.6503	-4.59686	0.00918234	0.0300513	-3.39478	0.00629432	0.109674
A1Z7K8	A1Z7K8	AIMP1	TRUE	3	-2.04986	-2.82411	-1.27561	24.722	-7.24325	0.00166252	0.0102601	-1.33649	0.00214901	0.283002
A1Z898	A1Z898	Caf1-105	TRUE	3	-1.96368	-2.36831	-1.55906	24.6723	-13.2773	0.000146932	0.00167039	1.57487	0.000349867	0.147898
A1Z8D5	A1Z8D5	CG18004	FALSE	0	-0.0647731	-0.321625	0.192079	25.1338	-0.689927	0.526839	0.588703	-7.7573	0.123305	0.0938839
A4V3J6	A4V3J6	Hrb98DE	FALSE	0	-4.94663	-5.43103	-4.46224	29.551	-27.9384	6.8863e-06	0.00037186	5.01998	7.7887e-05	0.177055
C0HL67	C0HL67		FALSE	0	-0.680837	-2.13088	0.76921	30.5219	-1.28455	0.265876	0.34596	-7.17563	0.0724621	0.530018
E1JGN7	E1JGN7	HnRNP-K	TRUE	3	-3.52946	-4.1688	-2.89013	25.5135	-15.1033	8.67991e-05	0.00110286	2.19433	0.000230996	0.233688
M9MSJ7	M9MSJ7	CG42676	FALSE	0	-0.258909	-0.797269	0.279451	26.5373	-1.31573	0.256155	0.338468	-7.13994	0.0708929	0.19678
M9PBE2	M9PBE2	Hakai	FALSE	0	-0.164479	-0.548884	0.219926	25.116	-1.17061	0.304471	0.389147	-7.30276	0.0815077	0.140507
M9PC85	M9PC85	x16	FALSE	0	0.716155	-0.0258332	1.45814	27.9941	2.64059	0.0553353	0.108658	-5.50172	0.0227587	0.27121
M9PFB2	M9PFB2	tral	TRUE	1	-2.33149	-3.27478	-1.38819	25.8811	-6.76203	0.00217113	0.0120247	-1.65897	0.00251861	0.344791
M9PI47	M9PI47	Sap130	FALSE	0	0.0601862	-0.271645	0.392017	26.285	0.496217	0.644844	0.707037	-7.88832	0.148091	0.12129
O02193	O02193	mof	FALSE	0	0.15821	-0.126499	0.442919	26.9321	1.52028	0.200451	0.275779	-6.89803	0.0577626	0.104066
O18373	O18373	Sps1	FALSE	0	-4.39087	-4.76805	-4.01369	28.1395	-31.8486	4.0039e-06	0.000288281	5.57046	6.03811e-05	0.137867
O44434	O44434	qkr58E-3	FALSE	0	-0.62721	-0.890577	-0.363843	27.868	-6.51542	0.00250542	0.0124481	-1.83194	0.00260728	0.0962654
O46106	O46106	noi	FALSE	0	-1.1357	-1.74691	-0.524483	25.933	-5.08348	0.00637505	0.0237416	-2.95738	0.00497273	0.22341
O61345	O61345	peng	FALSE	0	0.503771	0.233558	0.773983	28.8431	5.10058	0.00629691	0.0237416	-2.94256	0.00497273	0.0987673
O77410	O77410	eIF3e	FALSE	0	0.110065	-0.149092	0.369222	26.9754	1.16192	0.30762	0.390858	-7.31222	0.0818661	0.0947265
O97183	O97183	RpII33	FALSE	0	0.10532	-0.146908	0.357548	27.6135	1.14238	0.31481	0.395343	-7.33337	0.0828056	0.0921938
P05205	P05205	Su(var)205	FALSE	0	-0.908943	-1.19243	-0.625453	28.764	-8.77182	0.000781775	0.0062542	-0.425504	0.00130996	0.103621
P05552	P05552	Adf1	FALSE	0	-0.265641	-0.619029	0.0877477	25.8607	-2.05652	0.106257	0.176551	-6.22967	0.036979	0.12917
P17704	P17704	RpS17	FALSE	0	0.167853	-0.18189	0.517596	28.2796	1.31302	0.256985	0.338468	-7.14306	0.0708929	0.127837
P19018	P19018	tra2	FALSE	0	0.655829	0.354565	0.957094	26.1081	5.95572	0.00353014	0.0151509	-2.2458	0.00317339	0.110118
P20227	P20227	Tbp	FALSE	0	-0.196934	-0.575174	0.181306	26.5129	-1.42444	0.224874	0.303581	-7.01288	0.0635857	0.138254
P21187	P21187	pAbp	FALSE	0	-0.393151	-0.688593	-0.0977099	28.8894	-3.64066	0.0205489	0.0525759	-4.35196	0.0110122	0.107989
P22465	P22465	AnxB10	FALSE	0	0.20829	-0.0787105	0.495291	25.0544	1.98554	0.115399	0.186032	-6.31925	0.0389649	0.104904
P23226	P23226	Map205	FALSE	0	-0.314465	-0.65629	0.0273613	30.047	-2.51686	0.0632636	0.120929	-5.65355	0.0253288	0.124943
P24785	P24785	mle	FALSE	0	-4.36266	-4.83861	-3.8867	25.7518	-25.0772	1.07653e-05	0.000465061	4.5484	9.74081e-05	0.173969
P26017	P26017	Pc	TRUE	3	0.373012	-0.0746881	0.820713	23.871	2.27944	0.0823463	0.145794	-5.94905	0.0305368	0.163642
P45594	P45594	tsr	FALSE	0	-0.0993721	-0.366556	0.167812	27.7388	-1.01753	0.36443	0.444728	-7.46375	0.0931494	0.0976604
P45889	P45889	Arp1	FALSE	0	-0.0186349	-0.344004	0.306734	25.1882	-0.156691	0.882808	0.900103	-8.02138	0.188529	0.118928
P48555	P48555	Rala	FALSE	0	-0.0523727	-0.337375	0.23263	25.096	-0.502745	0.640622	0.707037	-7.88451	0.148091	0.104173
P48588	P48588	RpS25	FALSE	0	1.16893	0.703464	1.63439	27.3244	6.87058	0.00204139	0.0118859	-1.58453	0.00248954	0.170135
P51406	P51406	bys	FALSE	0	-0.206771	-0.465862	0.0523192	28.0951	-2.18339	0.0918314	0.157425	-6.06974	0.0329731	0.0947022
P52295	P52295	Pen	FALSE	0	-0.669853	-0.938248	-0.401459	28.9879	-6.82806	0.00209105	0.0118859	-1.61356	0.00248954	0.098103
P54357	P54357	Mlc-c	TRUE	1	-0.449015	-1.15843	0.260404	25.0752	-1.73161	0.155691	0.231927	-6.63813	0.0485776	0.259305
P54622	P54622	mtSSB	FALSE	0	-0.599469	-0.936096	-0.262841	26.2748	-4.87201	0.00744529	0.0263636	-3.14363	0.00552193	0.123043
P55830	P55830	RpS3A	FALSE	0	0.392276	0.0932234	0.691329	30.1316	3.58869	0.0215494	0.0541241	-4.40797	0.0113364	0.109309
Q02427	Q02427	Rbp1	FALSE	0	0.187614	-0.198357	0.573584	28.5437	1.32985	0.251864	0.335819	-7.12366	0.070338	0.141079
Q05856	Q05856	SmB	FALSE	0	-0.594487	-0.958344	-0.23063	30.0872	-4.46996	0.0101463	0.0304389	-3.51411	0.0063755	0.132996
Q0E980	Q0E980	CG8547	TRUE	1	-0.335106	-0.890407	0.220196	24.5235	-1.65099	0.171406	0.25016	-6.73814	0.0523966	0.202973
Q24318	Q24318	Dp	FALSE	0	0.279151	-0.0509564	0.609258	25.2947	2.31353	0.0792456	0.143841	-5.90634	0.0301278	0.12066
Q27268	Q27268	Hel25E	FALSE	0	-0.651194	-0.937338	-0.365049	29.1067	-6.22611	0.00298162	0.0135341	-2.04204	0.00283474	0.104591
Q27294	Q27294	caz	TRUE	3	-3.17866	-3.60153	-2.75579	25.4059	-20.5648	2.4415e-05	0.00066726	3.64977	0.000139759	0.154568
Q709R6	Q709R6	bocks	FALSE	0	0.215064	-0.239678	0.669805	26.4253	1.29388	0.262932	0.344202	-7.165	0.0720938	0.166216
Q7JNE1	Q7JNE1	prod	FALSE	0	-0.0490877	-0.318355	0.220179	27.4974	-0.498748	0.643205	0.707037	-7.88684	0.148091	0.0984219
Q7JW01	Q7JW01	CG15107	FALSE	0	-0.420666	-0.679798	-0.161534	25.2412	-4.44128	0.0103807	0.0307154	-3.54138	0.00643342	0.0947172
Q7JX87	Q7JX87	Prx2540-2	FALSE	0	0.0568652	-0.474549	0.588279	28.4019	0.292756	0.783747	0.829741	-7.98398	0.173791	0.194241
Q7K012	Q7K012	Bap55	FALSE	0	0.186128	-0.087132	0.459387	29.8127	1.86349	0.133164	0.209952	-6.47301	0.0439749	0.0998813
Q7K0K1	Q7K0K1	CG2063	TRUE	1	-0.382686	-0.767526	0.00215493	24.6828	-2.72053	0.0508169	0.103551	-5.40458	0.0216891	0.140666
Q7K0L8	Q7K0L8	FLASH	FALSE	0	0.0992508	-0.156358	0.354859	26.2053	1.06231	0.345886	0.426922	-7.41797	0.0894198	0.0934295
Q7K0Y1	Q7K0Y1	CG5033	FALSE	0	0.307489	0.0429422	0.572036	28.5918	3.17994	0.0317857	0.0693778	-4.86311	0.0145313	0.0966965
Q7K159	Q7K159	mip40	TRUE	1	-0.107801	-1.11283	0.897225	24.3976	-0.293452	0.783251	0.829741	-7.98373	0.173791	0.367355
Q7K4B2	Q7K4B2	l(2)k09848	FALSE	0	-0.41883	-0.687946	-0.149713	27.5463	-4.25783	0.0120442	0.0342308	-3.71867	0.00716973	0.0983668
Q7K5M2	Q7K5M2	CG10139	FALSE	0	-0.316566	-0.586674	-0.046458	27.4086	-3.20641	0.0309706	0.0693778	-4.83285	0.0145313	0.0987292
Q7KAH0	Q7KAH0	jim	FALSE	0	0.377232	0.117803	0.636661	27.8463	3.97815	0.01524	0.04064	-3.99848	0.00851215	0.0948259
Q7KMI3	Q7KMI3	CG8878	TRUE	3	0.0723369	-0.209902	0.354575	23.9621	0.70119	0.520465	0.587453	-7.74861	0.123044	0.103163
Q7KN62	Q7KN62	TER94	FALSE	0	-0.106374	-0.379139	0.166391	28.5085	-1.06694	0.344017	0.426922	-7.41317	0.0894198	0.0997004
Q7KVQ0	Q7KVQ0	CG4038	FALSE	0	0.242846	-0.166116	0.651807	29.9353	1.62457	0.176906	0.256454	-6.7707	0.053715	0.149483
Q7YZ99	Q7YZ99	Srrm234	FALSE	0	0.461458	0.159848	0.763067	26.6961	4.1858	0.0127837	0.0354009	-3.78962	0.0074148	0.110244
Q867Z4	Q867Z4	lola	FALSE	0	0.444721	0.10038	0.789062	27.4371	3.53338	0.0226781	0.0563042	-4.46803	0.0117931	0.125863
Q86B87	Q86B87	mod(mdg4)	FALSE	0	0.302003	-0.00705174	0.611057	30.2125	2.67342	0.0534262	0.106852	-5.46173	0.0223805	0.112965
Q8IMV6	Q8IMV6	Saf-B	FALSE	0	-2.60109	-2.9994	-2.20278	28.8859	-17.866	4.357e-05	0.000855556	2.993	0.000179198	0.145589
Q8IMX8	Q8IMX8	LSm3	TRUE	3	-1.87681	-2.4573	-1.29632	24.9126	-8.84534	0.000756242	0.0062542	-0.385468	0.00130996	0.21218
Q8IQB7	Q8IQB7	CG32032	FALSE	0	-0.117267	-0.368527	0.133994	25.5988	-1.27686	0.268331	0.347063	-7.18439	0.0726932	0.0918401
Q8MRW1	Q8MRW1	Tim23	TRUE	2	-0.0375158	-0.526365	0.451333	24.4813	-0.209958	0.843595	0.880273	-8.00937	0.184375	0.178683
Q8MT06	Q8MT06	Ns1	FALSE	0	-0.0375989	-0.295433	0.220235	29.2206	-0.398957	0.709579	0.766346	-7.93976	0.160513	0.0942429
Q8STI6	Q8STI6	CG1142	FALSE	0	0.234439	-0.0460048	0.514883	25.8666	2.28705	0.0816423	0.145794	-5.9395	0.0305368	0.102507
Q8SWS7	Q8SWS7	vito	TRUE	3	0.0130707	-0.612779	0.63892	23.5454	0.0571376	0.957078	0.961529	-8.03452	0.201395	0.228759
Q8T4A9	Q8T4A9	Rrp45	TRUE	2	-2.07252	-2.59767	-1.54738	25.3159	-10.7973	0.000339961	0.0033378	0.575693	0.00069911	0.191949
Q94513	Q94513	BEAF-32	FALSE	0	0.19034	-0.0996552	0.480335	27.773	1.79569	0.14428	0.223879	-6.55809	0.0468919	0.105998
Q94522	Q94522	Scsalpha1	FALSE	0	-1.24633	-1.92372	-0.568939	28.7456	-5.03367	0.00660941	0.0237939	-3.00073	0.00498369	0.247599
Q94901	Q94901	lark	FALSE	0	0.166024	-0.397296	0.729345	29.8362	0.80632	0.463673	0.541369	-7.66226	0.113391	0.205904
Q95RB1	Q95RB1	CG14641	FALSE	0	-1.4321	-1.94231	-0.921889	27.3758	-7.67917	0.00132266	0.00840279	-1.06021	0.00175998	0.186492
Q960E4	Q960E4	CG8929	FALSE	0	0.16706	-0.16348	0.497599	24.9425	1.38274	0.236405	0.317164	-7.06206	0.0664307	0.120818
Q961D1	Q961D1	CycK	FALSE	0	-0.210729	-0.503408	0.0819505	28.0059	-1.96981	0.117537	0.186677	-6.33909	0.0390999	0.106979
Q9I7H8	Q9I7H8	CG18766	TRUE	3	-0.47703	-0.860221	-0.093839	24.301	-3.40582	0.025558	0.0613393	-4.60837	0.0128477	0.140063
Q9I7W5	Q9I7W5	Sas10	FALSE	0	-0.148327	-0.414562	0.117908	29.1327	-1.52422	0.199506	0.275779	-6.89326	0.0577626	0.0973136
Q9NKV0	Q9NKV0	Mlf	FALSE	0	-0.0337389	-0.35287	0.285392	25.5505	-0.289237	0.786258	0.829741	-7.98522	0.173791	0.116648
Q9V3C0	Q9V3C0	abs	FALSE	0	0.100366	-0.200234	0.400966	28.8186	0.913457	0.410868	0.490317	-7.5654	0.102698	0.109875
Q9V3E7	Q9V3E7	Ref1	FALSE	0	-0.683874	-0.982272	-0.385476	29.0623	-6.27006	0.00290258	0.0135341	-2.0096	0.00283474	0.10907
Q9V3F3	Q9V3F3	mTTF	FALSE	0	0.0107106	-0.315698	0.337119	24.2683	0.0897726	0.932629	0.941345	-8.03156	0.197167	0.119308
Q9V3L6	Q9V3L6	Cbp20	TRUE	1	-1.27723	-2.09677	-0.457689	25.3837	-4.26374	0.0119859	0.0342308	-3.71289	0.00716973	0.299556
Q9V3P3	Q9V3P3	REG	FALSE	0	-0.566092	-0.872574	-0.25961	25.2863	-5.05329	0.00651589	0.0237939	-2.98362	0.00498369	0.112025
Q9V3W7	Q9V3W7	SF2	FALSE	0	-1.52394	-1.78793	-1.25995	30.7064	-15.7933	7.22845e-05	0.0010409	2.4079	0.000218018	0.096493
Q9V3Y5	Q9V3Y5	CG4119	FALSE	0	-0.193631	-0.49666	0.109398	28.6153	-1.74816	0.152655	0.229846	-6.61749	0.0481417	0.110763
Q9V405	Q9V405	Rpt3	TRUE	2	0.412951	0.0567985	0.769103	24.2881	3.17215	0.0320301	0.0693778	-4.87203	0.0145313	0.13018
Q9V406	Q9V406	crp	FALSE	0	-0.0752751	-0.365007	0.214457	27.1264	-0.710798	0.515071	0.585555	-7.7411	0.122646	0.105902
Q9V468	Q9V468	CG9776	FALSE	0	0.268106	-0.0356407	0.571853	28.3864	2.41483	0.0707775	0.131792	-5.77994	0.0276043	0.111025
Q9V4Q8	Q9V4Q8	U2A	FALSE	0	-2.45808	-2.78606	-2.1301	27.4484	-20.5043	2.47134e-05	0.00066726	3.63616	0.000139759	0.119881
Q9V5P6	Q9V5P6	CG7637	FALSE	0	0.512504	-0.101907	1.12691	27.4188	2.28208	0.0821015	0.145794	-5.94574	0.0305368	0.224578
Q9V6Q2	Q9V6Q2	cid	TRUE	3	0.291696	-0.727262	1.31065	24.3341	0.783186	0.475748	0.552481	-7.68204	0.115719	0.372447
Q9V9K7	Q9V9K7	Ars2	FALSE	0	-1.23989	-1.5752	-0.904582	28.592	-10.1164	0.000441942	0.00415041	0.261021	0.000869314	0.122562
Q9V9U9	Q9V9U9	CG11563	FALSE	0	0.424817	-0.086865	0.936498	28.3715	2.2714	0.0830968	0.145926	-5.95913	0.0305646	0.187029
Q9V9Z9	Q9V9Z9	CG1542	FALSE	0	-0.185523	-0.517154	0.146108	27.5961	-1.53051	0.198008	0.275779	-6.88564	0.0577626	0.121217
Q9VA18	Q9VA18	Chchd3	TRUE	1	0.280952	-0.0809768	0.642881	24.195	2.12374	0.098327	0.164641	-6.14489	0.0344844	0.132291
Q9VAC4	Q9VAC4	Nph	TRUE	2	-0.819713	-1.46379	-0.175634	24.5914	-3.48189	0.0237921	0.0583989	-4.52438	0.0122318	0.235422
Q9VAY6	Q9VAY6	BCAS2	FALSE	0	-0.507496	-0.799337	-0.215655	26.2605	-4.75749	0.0081154	0.0278242	-3.24692	0.00582785	0.106673
Q9VBK9	Q9VBK9	CG5913	TRUE	1	-3.54849	-4.35362	-2.74336	25.9193	-12.0579	0.000217422	0.00234816	1.10964	0.000491827	0.294289
Q9VBY2	Q9VBY2	CG11920	FALSE	0	0.399541	-0.0384342	0.837516	27.2609	2.49576	0.06474	0.121599	-5.6796	0.0254691	0.160088
Q9VBY6	Q9VBY6	PQBP1	TRUE	1	0.00872993	-0.670445	0.687905	23.4601	0.0351658	0.973572	0.973572	-8.03578	0.203917	0.24825
Q9VC28	Q9VC28	CG7006	FALSE	0	-0.305075	-0.557771	-0.0523796	28.2474	-3.30294	0.0281981	0.0669318	-4.72342	0.014019	0.0923647
Q9VC49	Q9VC49	Rpb10	TRUE	3	-1.21837	-1.627	-0.809733	24.4353	-8.15707	0.00104274	0.00750775	-0.773048	0.00157252	0.149363
Q9VC96	Q9VC96	BRWD3	TRUE	1	0.082359	-1.20166	1.36638	25.1211	0.175481	0.868922	0.898024	-8.01754	0.188093	0.469332
Q9VCK0	Q9VCK0	eIF3d1	FALSE	0	-0.644195	-0.915542	-0.372848	27.9417	-6.49507	0.00253572	0.0124481	-1.84646	0.00260728	0.0991821
Q9VCU6	Q9VCU6	HP1c	TRUE	2	-1.29844	-2.45219	-0.144701	25.1445	-3.07897	0.0351337	0.0736784	-4.97949	0.0154321	0.421714
Q9VD26	Q9VD26	CG5382	TRUE	4	0.324423	-0.47633	1.12518	23.9033	1.10842	0.327668	0.409111	-7.36965	0.0856893	0.292689
Q9VD52	Q9VD52	CG6015	FALSE	0	0.190835	-0.0675408	0.449211	27.3266	2.02068	0.11077	0.182644	-6.27491	0.0382552	0.094441
Q9VDE5	Q9VDE5	ppan	FALSE	0	0.164726	-0.428175	0.757626	29.8096	0.7601	0.488037	0.563721	-7.70135	0.118073	0.216716
Q9VE17	Q9VE17	snRNP-U1-C	TRUE	3	-2.27928	-2.59637	-1.96218	24.9105	-19.6652	2.93567e-05	0.000704562	3.44241	0.000147572	0.115904
Q9VE52	Q9VE52	CstF64	FALSE	0	-0.970924	-1.29175	-0.650103	26.4673	-8.27968	0.000983014	0.00732176	-0.701845	0.00153356	0.117266
Q9VEA5	Q9VEA5	Rpb4	FALSE	0	-0.794194	-1.13987	-0.448513	25.2706	-6.28554	0.00287535	0.0135341	-1.99823	0.00283474	0.126353
Q9VEF0	Q9VEF0	Odj	FALSE	0	-0.131143	-0.536269	0.273983	25.9858	-0.885619	0.424096	0.500573	-7.59137	0.104846	0.148081
Q9VEJ0	Q9VEJ0	Prx3	TRUE	2	-0.376495	-0.701494	-0.051495	24.2614	-3.16933	0.0321193	0.0693778	-4.87526	0.0145313	0.118793
Q9VEJ1	Q9VEJ1	SF1	FALSE	0	0.262744	-0.183259	0.708747	26.2272	1.61171	0.17965	0.258696	-6.78652	0.0541845	0.163022
Q9VEP9	Q9VEP9	Sf3a1	TRUE	2	-1.57658	-2.92766	-0.225492	24.673	-3.19245	0.0313973	0.0693778	-4.84879	0.0145313	0.493845
Q9VEY5	Q9VEY5	CG5903	TRUE	2	-0.0963848	-0.638903	0.446133	24.2377	-0.486055	0.651449	0.710671	-7.89416	0.148852	0.1983
Q9VFE6	Q9VFE6	CG3817	FALSE	0	-0.386425	-0.809934	0.0370833	25.7669	-2.49629	0.0647027	0.121599	-5.67895	0.0254691	0.1548
Q9VFT4	Q9VFT4	rin	FALSE	0	-0.305802	-0.569566	-0.0420375	30.2828	-3.17187	0.032039	0.0693778	-4.87235	0.0145313	0.0964105
Q9VGH5	Q9VGH5	glo	TRUE	3	-5.52242	-5.87	-5.17485	26.4896	-43.4678	1.10292e-06	0.000238231	6.75858	4.9898e-05	0.127046
Q9VGN9	Q9VGN9	RpL24-like	FALSE	0	0.328838	-0.0565412	0.714218	27.3431	2.33445	0.0774075	0.141695	-5.88016	0.0296784	0.140863
Q9VH64	Q9VH64	CG8507	TRUE	3	-4.41812	-4.75707	-4.07918	25.9325	-35.6618	2.50611e-06	0.00027066	6.02367	5.66904e-05	0.12389
Q9VH84	Q9VH84	Pnn	FALSE	0	0.180702	-0.240579	0.601983	25.6714	1.1735	0.303433	0.389147	-7.29961	0.0815077	0.153986
Q9VHH8	Q9VHH8	beag	FALSE	0	-2.22225	-2.64619	-1.79831	27.3974	-14.3411	0.000107274	0.00128729	1.94593	0.000269626	0.154956
Q9VHP0	Q9VHP0	bel	FALSE	0	-0.236571	-0.529821	0.0566789	31.9579	-2.20707	0.0893853	0.154458	-6.03994	0.0323515	0.107188
Q9VIH1	Q9VIH1	RPA2	TRUE	3	-1.4871	-1.99348	-0.980725	24.702	-8.0345	0.00110697	0.00771306	-0.845211	0.00161552	0.185089
Q9VIW3	Q9VIW3	RanGAP	FALSE	0	0.316757	-0.011234	0.644747	30.3695	2.64214	0.0552436	0.108658	-5.49983	0.0227587	0.119886
Q9VJI6	Q9VJI6	BuGZ	TRUE	3	-4.13305	-4.66005	-3.60604	25.8487	-21.4559	2.04975e-05	0.00066726	3.84495	0.000139759	0.19263
Q9VJQ5	Q9VJQ5	NC2beta	TRUE	2	-0.0577845	-1.26464	1.14907	24.4993	-0.130993	0.901879	0.914581	-8.02594	0.191561	0.441127
Q9VKC1	Q9VKC1	RpL7-like	FALSE	0	0.688381	0.253627	1.12313	28.8517	4.33189	0.0113368	0.0330911	-3.64652	0.00693101	0.15891
Q9VKD8	Q9VKD8	CG6686	FALSE	0	0.455857	0.0485802	0.863134	32.6025	3.06218	0.0357295	0.0742075	-4.999	0.0155429	0.148867
Q9VKM2	Q9VKM2	SCAR	FALSE	0	-0.893626	-1.17562	-0.611634	28.312	-8.66982	0.000818981	0.00631785	-0.481572	0.00132329	0.103073
Q9VKM7	Q9VKM7	CG33129	FALSE	0	-1.76084	-2.05072	-1.47095	28.4364	-16.6182	5.86617e-05	0.000905066	2.65034	0.000189568	0.105959
Q9VKV5	Q9VKV5	holn1	FALSE	0	0.333041	0.0404421	0.625639	25.9912	3.11399	0.033928	0.0725589	-4.93896	0.0151976	0.10695
Q9VKW3	Q9VKW3	RfC3	FALSE	0	0.483196	0.0750305	0.891362	26.8669	3.23876	0.0300073	0.0693778	-4.79602	0.0145313	0.149192
Q9VLK1	Q9VLK1	CG13097	FALSE	0	0.407754	0.0826043	0.732903	26.4503	3.43089	0.0249596	0.060576	-4.5806	0.0126878	0.118848
Q9VLV5	Q9VLV5	SmE	FALSE	0	0.220623	-0.124727	0.565972	25.9453	1.74776	0.152728	0.229846	-6.61799	0.0481417	0.126231
Q9VM17	Q9VM17	CG5181	FALSE	0	-0.411858	-0.663143	-0.160572	24.4583	-4.48405	0.0100334	0.0304389	-3.50075	0.0063755	0.0918495
Q9VM62	Q9VM62	SA	FALSE	0	0.22575	-0.108831	0.560332	28.5748	1.84594	0.13595	0.212792	-6.49505	0.0445697	0.122295
Q9VM95	Q9VM95	Aatf	FALSE	0	0.128367	-0.176177	0.432911	26.7929	1.15317	0.31082	0.392615	-7.32171	0.0822341	0.111316
Q9VMC8	Q9VMC8	Phf5a	TRUE	1	-0.950817	-1.62289	-0.278749	24.9166	-3.87057	0.0167329	0.0438852	-4.10925	0.00919187	0.245653
Q9VMJ1	Q9VMJ1	CG9107	FALSE	0	0.506107	0.200551	0.811663	26.4061	4.53152	0.00966422	0.0301488	-3.45594	0.00631474	0.111686
Q9VMM3	Q9VMM3	CG7239	FALSE	0	-0.422072	-0.825798	-0.0183448	27.1677	-2.86016	0.0439011	0.0903109	-5.23687	0.0189158	0.147569
Q9VMM7	Q9VMM7	CG11030	FALSE	0	-0.298707	-0.562037	-0.0353776	26.5377	-3.1034	0.0342874	0.0726086	-4.9512	0.0152081	0.0962516
Q9VMX2	Q9VMX2	l(2)05714	TRUE	1	-0.455953	-1.24058	0.328671	25.23	-1.58983	0.184419	0.263804	-6.81336	0.0552545	0.286794
Q9VMX3	Q9VMX3	CG3756	FALSE	0	-0.528015	-0.838945	-0.217086	26.6173	-4.64596	0.00883914	0.0294853	-3.34921	0.00617577	0.11365
Q9VN31	Q9VN31	Fip1	FALSE	0	-0.196051	-0.551109	0.159006	27.2937	-1.51065	0.202781	0.277219	-6.90968	0.0580643	0.12978
Q9VN50	Q9VN50	eIF3f1	FALSE	0	0.0908378	-0.485835	0.667511	25.5635	0.430952	0.687919	0.746686	-7.92396	0.156395	0.210784
Q9VN55	Q9VN55	atms	FALSE	0	0.752566	0.445174	1.05996	25.2258	6.69797	0.00225244	0.0121632	-1.70338	0.00254761	0.112357
Q9VN88	Q9VN88	Vps37B	TRUE	3	0.199186	-0.148911	0.547283	24.043	1.56549	0.189875	0.269823	-6.8431	0.056515	0.127236
Q9VNA3	Q9VNA3	CG11999	FALSE	0	-1.36972	-1.69795	-1.04148	26.3977	-11.4167	0.000271332	0.00279085	0.845432	0.000584549	0.119975
Q9VNE0	Q9VNE0	CG2926	FALSE	0	0.634997	0.307582	0.962411	26.3034	5.30598	0.00544331	0.0213773	-2.76746	0.00447754	0.119676
Q9VNP3	Q9VNP3	Mes2	FALSE	0	-0.0403762	-0.352265	0.271513	27.2522	-0.354175	0.740451	0.795709	-7.95997	0.166663	0.114001
Q9VNZ3	Q9VNZ3	Rpb8	TRUE	2	-2.86153	-4.30398	-1.41908	25.9481	-5.42737	0.00500463	0.0200185	-2.66636	0.00419292	0.527241
Q9VPL0	Q9VPL0	CG3436	FALSE	0	0.182803	-0.0707782	0.436384	26.793	1.97223	0.117205	0.186677	-6.33604	0.0390999	0.0926883
Q9VPM5	Q9VPM5	mbm	TRUE	1	-0.412953	-1.59321	0.767301	24.7465	-0.957232	0.390758	0.46891	-7.52349	0.0982143	0.431404
Q9VPR5	Q9VPR5	Sf3b1	FALSE	0	0.858637	0.553262	1.16401	28.8845	7.69251	0.00131367	0.00840279	-1.05198	0.00175998	0.11162
Q9VQ27	Q9VQ27	CG14352	TRUE	2	-1.47803	-2.36708	-0.588978	25.0581	-4.54828	0.00953772	0.0301488	-3.44019	0.00631474	0.324964
Q9VQK7	Q9VQK7	Sf3b2	FALSE	0	0.610881	0.32928	0.892482	26.186	5.9349	0.00357729	0.0151509	-2.2618	0.00317339	0.10293
Q9VRJ4	Q9VRJ4	CG10672	TRUE	3	-1.6617	-2.36073	-0.962662	25.0247	-6.50346	0.00252318	0.0124481	-1.84047	0.00260728	0.255509
Q9VRV7	Q9VRV7	Sf3b6	FALSE	0	0.0367903	-0.313283	0.386864	25.7911	0.287519	0.787485	0.829741	-7.98582	0.173791	0.127958
Q9VTT2	Q9VTT2	vers	FALSE	0	0.0248912	-0.258419	0.308201	25.4779	0.240368	0.82144	0.861315	-8.00099	0.180405	0.103555
Q9VTT3	Q9VTT3	ssp	TRUE	1	0.304273	-0.544037	1.15258	24.2764	0.981297	0.380061	0.458621	-7.49992	0.0960593	0.310073
Q9VTU4	Q9VTU4	eIF3l	FALSE	0	-0.0671126	-0.330108	0.195883	27.6126	-0.698148	0.522181	0.587453	-7.75097	0.123044	0.0961294
Q9VU02	Q9VU02	SmD1	FALSE	0	0.82408	-0.0337179	1.68188	26.9971	2.62831	0.0560698	0.109109	-5.51672	0.0228531	0.31354
Q9VUC3	Q9VUC3	CG6833	TRUE	2	0.0146366	-0.242309	0.271582	23.9798	0.155845	0.883434	0.900103	-8.02154	0.188529	0.0939182
Q9VUR2	Q9VUR2	CG12301	FALSE	0	0.18294	-0.0687083	0.434589	28.4917	1.98887	0.11495	0.186032	-6.31505	0.0389649	0.091982
Q9VUZ0	Q9VUZ0	SsRbeta	TRUE	3	-0.135732	-0.654812	0.383348	24.5875	-0.715384	0.512512	0.585555	-7.73749	0.122646	0.189733
Q9VVH5	Q9VVH5	UQCR-Q	FALSE	0	-0.028952	-0.523186	0.465282	26.3625	-0.160265	0.880163	0.900103	-8.02068	0.188529	0.180651
Q9VVU2	Q9VVU2	RpL26	FALSE	0	0.933322	0.547482	1.31916	27.4812	6.61784	0.00235944	0.0124302	-1.75944	0.00260354	0.141031
Q9VVU6	Q9VVU6	CG6841	FALSE	0	0.199305	-0.113169	0.51178	28.3738	1.745	0.15323	0.229846	-6.62143	0.0481417	0.114215
Q9VW53	Q9VW53	Mtr3	TRUE	3	-2.40203	-2.78927	-2.01479	24.9678	-16.9703	5.38232e-05	0.000905066	2.74985	0.000189568	0.141543
Q9VW59	Q9VW59	RhoGDI	TRUE	4	0.362486	-0.280929	1.0059	23.7047	1.54132	0.195458	0.275779	-6.87253	0.0577626	0.23518
Q9VWG2	Q9VWG2	CG14220	TRUE	2	-0.42446	-1.5529	0.703984	24.721	-1.02908	0.359565	0.441284	-7.45205	0.092428	0.412466
Q9VWG3	Q9VWG3	RpS10b	FALSE	0	-0.103167	-0.426635	0.220301	26.7371	-0.872572	0.430415	0.505269	-7.60335	0.10583	0.118233
Q9VWL4	Q9VWL4	CG7556	TRUE	3	-1.33451	-2.03146	-0.637563	24.7201	-5.23857	0.00570703	0.0220128	-2.82435	0.00461064	0.254748
Q9VWY6	Q9VWY6	Taf8	FALSE	0	0.305277	-0.0440317	0.654586	24.3201	2.39098	0.0726757	0.13417	-5.80962	0.0281023	0.127678
Q9VXL4	Q9VXL4	Rrp47	TRUE	3	-1.07806	-1.45108	-0.705032	24.1754	-7.90672	0.00117918	0.00795944	-0.921519	0.00166712	0.136347
Q9VYE3	Q9VYE3	CG15747	TRUE	3	-0.600937	-0.997066	-0.204809	24.2015	-4.15035	0.0131675	0.0360023	-3.82483	0.00754077	0.144792
Q9VYY7	Q9VYY7	HP5	FALSE	0	-0.197468	-0.500659	0.105723	27.2461	-1.78185	0.146667	0.224682	-6.5754	0.0470601	0.110822
Q9VZ02	Q9VZ02	CG1738	TRUE	3	0.754385	0.324186	1.18458	23.69	4.79751	0.0078733	0.0274296	-3.21063	0.00574519	0.157245
Q9VZ60	Q9VZ60	CG2186	FALSE	0	-2.17519	-2.56425	-1.78614	24.5309	-15.2961	8.24062e-05	0.00110286	2.25505	0.000230996	0.142206
Q9VZ62	Q9VZ62	feo	FALSE	0	0.314801	-0.166109	0.795712	25.1043	1.79087	0.145107	0.223879	-6.56412	0.0468919	0.175781
Q9VZC8	Q9VZC8	CG15019	TRUE	2	-0.909225	-1.4452	-0.373245	24.6517	-4.64103	0.0088729	0.0294853	-3.35377	0.00617577	0.19591
Q9VZS5	Q9VZS5	RpL28	FALSE	0	0.869004	0.532146	1.20586	28.7234	7.05775	0.00183922	0.0110353	-1.45853	0.00231137	0.123128
Q9VZV8	Q9VZV8	CG16753	TRUE	2	-0.657766	-1.56413	0.248597	24.6725	-1.98546	0.115409	0.186032	-6.31935	0.0389649	0.331292
Q9W0A8	Q9W0A8	RpL23A	FALSE	0	0.478571	-0.133378	1.09052	29.4868	2.13955	0.096557	0.16294	-6.12495	0.0341282	0.223678
Q9W0H8	Q9W0H8	scf	FALSE	0	-0.14329	-0.39962	0.113039	25.6482	-1.52936	0.19828	0.275779	-6.88703	0.0577626	0.093693
Q9W140	Q9W140	CG3548	FALSE	0	0.357352	0.0882594	0.626446	26.2037	3.63317	0.0206896	0.0525759	-4.36001	0.0110122	0.0983583
Q9W1C8	Q9W1C8	CG3163	FALSE	0	0.0193235	-0.264272	0.302919	26.7268	0.186414	0.860868	0.893978	-8.0151	0.187246	0.103659
Q9W1G7	Q9W1G7	Nap1	TRUE	1	-1.16879	-3.09098	0.753404	26.2839	-1.66353	0.168857	0.248116	-6.72264	0.0519686	0.702595
Q9W1N3	Q9W1N3	levy	TRUE	2	-0.266889	-1.2852	0.751422	24.5284	-0.717038	0.51159	0.585555	-7.73618	0.122646	0.372211
Q9W2K3	Q9W2K3	hng1	FALSE	0	-0.186011	-0.485494	0.113471	25.5909	-1.69926	0.161808	0.239388	-6.67836	0.0501403	0.109466
Q9W2N6	Q9W2N6	CG9346	FALSE	0	0.744993	0.416888	1.0731	26.0066	6.21199	0.00300757	0.0135341	-2.0525	0.00283474	0.119928
Q9W384	Q9W384	Bap111	FALSE	0	-0.604838	-0.892827	-0.316848	29.2277	-5.74585	0.00404243	0.0167916	-2.40919	0.00351705	0.105265
Q9W3B2	Q9W3B2	Rbm13	FALSE	0	-0.0928935	-0.345954	0.160167	27.1301	-1.00428	0.370082	0.449088	-7.47707	0.0940625	0.092498
Q9W3M7	Q9W3M7	mahe	TRUE	1	-3.06797	-3.95172	-2.18421	25.2229	-9.49749	0.00056931	0.00512379	-0.0434463	0.00107319	0.323029
Q9W424	Q9W424	Spx	FALSE	0	-0.610149	-0.908416	-0.311882	27.0734	-5.59657	0.00446248	0.0181867	-2.52831	0.00380925	0.109022
Q9W4Z9	Q9W4Z9	CG3071	FALSE	0	0.0924605	-0.27597	0.460891	28.8623	0.686582	0.528743	0.588703	-7.75986	0.123305	0.134668
Q9W542	Q9W542	mip130	FALSE	0	0.41806	0.16629	0.66983	28.5795	4.54283	0.00957863	0.0301488	-3.44531	0.00631474	0.0920263
Q9W543	Q9W543	Rbcn-3B	TRUE	3	0.406962	0.128414	0.68551	23.6037	3.9971	0.0149938	0.0404831	-3.97915	0.00847929	0.101814
Q9XZ21	Q9XZ21	snama	FALSE	0	0.728735	0.25633	1.20114	27.7686	4.22034	0.0124225	0.0348476	-3.75551	0.00729892	0.172672
Q9XZ57	Q9XZ57	Eb1	FALSE	0	-0.89698	-1.16606	-0.627898	28.297	-9.11991	0.000669508	0.00578455	-0.238654	0.00121159	0.098354
Q9Y091	Q9Y091	fl(2)d	FALSE	0	0.0873355	-0.178288	0.35296	28.5305	0.899529	0.417443	0.495427	-7.57846	0.103768	0.0970903
Q9Y0I1	Q9Y0I1	MRG15	FALSE	0	-0.768064	-1.11412	-0.422008	26.4519	-6.07216	0.00328002	0.0144588	-2.15714	0.00302844	0.126489
X2JC79	X2JC79	eIF4H1	FALSE	0	-2.01824	-2.34648	-1.69	27.1896	-16.8219	5.58002e-05	0.000905066	2.70818	0.000189568	0.119977
X2JEU3	X2JEU3	CG1737	FALSE	0	0.497074	0.19605	0.798098	28.0575	4.51764	0.00977045	0.0301488	-3.46901	0.00631474	0.11003
X2JFW6	X2JFW6	CG8289	FALSE	0	-0.220353	-0.487323	0.0466175	25.7642	-2.25812	0.0843533	0.146938	-5.97579	0.0307765	0.0975824
