# Supplementary material for: The role of RNA in the maintenance of chromatin domains as revealed by antibody-mediated proximity labelling coupled to mass spectrometry
Source: eLife. 2024 May 8;13:e95718. doi: 10.7554/eLife.95718 (PMC11147508; doi:10.7554/eLife.95718)
Supplement: Supplementary file 11. [file elife-95718-supp11.xlsx]

## Sheet: CID Rnase protein
name	Uniprot	symbol
Q9VGH5	Q9VGH5	glo
Q9VH64	Q9VH64	CG8507
O18373	O18373	Sps1
A4V3J6	A4V3J6	Hrb98DE
P24785	P24785	mle
Q9V4Q8	Q9V4Q8	U2A
Q27294	Q27294	caz
Q9VJI6	Q9VJI6	BuGZ
Q9VE17	Q9VE17	snRNP-U1-C
A0A0B4KHD9	A0A0B4KHD9	CG5746
Q8IMV6	Q8IMV6	Saf-B
Q9VKM7	Q9VKM7	CG33129
X2JC79	X2JC79	eIF4H1
Q9VW53	Q9VW53	Mtr3
Q9V3W7	Q9V3W7	SF2
Q9VZ60	Q9VZ60	CG2186
E1JGN7	E1JGN7	HnRNP-K
Q9VHH8	Q9VHH8	beag
A1Z898	A1Z898	Caf1-105
Q9VBK9	Q9VBK9	CG5913
Q9VNA3	Q9VNA3	CG11999
Q8T4A9	Q8T4A9	Rrp45
Q9V9K7	Q9V9K7	Ars2
Q9W3M7	Q9W3M7	mahe
Q9XZ57	Q9XZ57	Eb1
P05205	P05205	Su(var)205
Q8IMX8	Q8IMX8	LSm3
Q9VKM2	Q9VKM2	SCAR
Q9VE52	Q9VE52	CstF64
Q9VC49	Q9VC49	Rpb10
Q9VIH1	Q9VIH1	RPA2
Q9VXL4	Q9VXL4	Rrp47
Q9VPR5	Q9VPR5	Sf3b1
Q95RB1	Q95RB1	CG14641
A1Z7K8	A1Z7K8	AIMP1
Q9VZS5	Q9VZS5	RpL28
P48588	P48588	RpS25
P52295	P52295	Pen
M9PFB2	M9PFB2	tral
Q9VN55	Q9VN55	atms
Q9VVU2	Q9VVU2	RpL26

## Sheet: Msl2 Rnase protein
name	Uniprot	symbol
E1JJ72	E1JJ72	Taf1
A0A0B4KFB8	A0A0B4KFB8	CG42724
Q9VHH8	Q9VHH8	beag
Q9VUQ5	Q9VUQ5	AGO2
Q9V3E7	Q9V3E7	Ref1
Q9VMM3	Q9VMM3	CG7239
Q9VAY6	Q9VAY6	BCAS2
M9NF33	M9NF33	Cpsf6
Q9VID9	Q9VID9	CG8677
Q9V4Q8	Q9V4Q8	U2A
A4V2K7	A4V2K7	D1
Q9VFT4	Q9VFT4	rin
A4V3J6	A4V3J6	Hrb98DE
A1Z968	A1Z968	NAT1
E1JIK0	E1JIK0	Hrb87F
Q9Y091	Q9Y091	fl(2)d
Q9VE52	Q9VE52	CstF64
A0A0B4LGZ5	A0A0B4LGZ5	RpL11
Q8IMV6	Q8IMV6	Saf-B
Q9VNP3	Q9VNP3	Mes2
Q9VAA9	Q9VAA9	Jasper
M9PCI2	M9PCI2	NHP2
Q9V406	Q9V406	crp
Q24478	Q24478	Cp190
P28668	P28668	GluProRS
P41073	P41073	Pep
Q9W384	Q9W384	Bap111
Q9VGH5	Q9VGH5	glo
Q9VVU2	Q9VVU2	RpL26
Q0E8X6	Q0E8X6	eIF2Bdelta
A1ZBE9	A1ZBE9	MetRS
E1JHA4	E1JHA4	Hrb27C
E2QC83	E2QC83	Pabp2
A0A0B4KER0	A0A0B4KER0	row
Q9W255	Q9W255	qkr58E-1
Q05856	Q05856	SmB
E4NKG1	E4NKG1	Capr
P54622	P54622	mtSSB
Q9VBY2	Q9VBY2	CG11920
A1Z830	A1Z830	CG12128
M9PBM1	M9PBM1	U2af38
Q9W4Y3	Q9W4Y3	trol
X2JFR1	X2JFR1	nonA
Q9XZ57	Q9XZ57	Eb1
Q9VJ77	Q9VJ77	CG15160
Q9VPC0	Q9VPC0	Pitslre
Q9VK59	Q9VK59	CG5787
A0A0B4K652	A0A0B4K652	RpII15
P91638	P91638	smid
Q9VQK7	Q9VQK7	Sf3b2
Q9VBK9	Q9VBK9	CG5913
Q9V3W7	Q9V3W7	SF2
A0A0B4KED0	A0A0B4KED0	RpL38
Q0E931	Q0E931	Dgp-1
Q0E8J0	Q0E8J0	MEP-1
Q9VN31	Q9VN31	Fip1
M9PGQ6	M9PGQ6	Bx42
Q53YG3	Q53YG3	Myb
Q0KHX7	Q0KHX7	CG13366
Q95RB1	Q95RB1	CG14641
M9NEL3	M9NEL3	kis
X2J9B3	X2J9B3	E2f2
Q9VBX4	Q9VBX4	CG31510
Q9VI58	Q9VI58	Tailor
Q7JZW2	Q7JZW2	RpS15
Q9VHG6	Q9VHG6	Ibf2
Q7JXU4	Q7JXU4	Ns2
E1JH57	E1JH57	mars
P34739	P34739	lds
Q9VLX2	Q9VLX2	CG7154
M9NFR5	M9NFR5	yps
Q9VHC7	Q9VHC7	rump
A0A126GUZ1	A0A126GUZ1	pre-mod(mdg4)-V
Q9VTZ0	Q9VTZ0	tral
Q0E8G6	Q0E8G6	Cpsf5
Q9W140	Q9W140	CG3548
Q9VPY4	Q9VPY4	CG4887
Q7JQY8	Q7JQY8	CG30020
Q0KI68	Q0KI68	nsl1
Q8MLW2	Q8MLW2	dom
Q9VVI0	Q9VVI0	U4-U6-60K
Q9VTC1	Q9VTC1	CG6418
M9NCS8	M9NCS8	Glt
O18373	O18373	Sps1
Q9VI54	Q9VI54	CG1965
Q7K012	Q7K012	Bap55
P49847	P49847	Taf6
Q9W0S7	Q9W0S7	Tudor-SN
P13709	P13709	fs(1)h
A0A0B4K6W1	A0A0B4K6W1	su(Hw)
P24785	P24785	mle
P54357	P54357	Mlc-c
Q8SWW4	Q8SWW4	CG16972
Q9VK58	Q9VK58	Pih1D1
Q9VIP9	Q9VIP9	barr
M9PJE8	M9PJE8	e(r)
M9PEY6	M9PEY6	Rat1
Q9VNA3	Q9VNA3	CG11999
F0JAG6	F0JAG6	Actn
Q9VUE5	Q9VUE5	stwl
Q86CW5	Q86CW5	Hmr
Q9VZ62	Q9VZ62	feo
A0A126GUM8	A0A126GUM8	lig
Q9W1A9	Q9W1A9	enok
Q24319	Q24319	Ost48
A0A0B4KEE4	A0A0B4KEE4	koi
X2JEU3	X2JEU3	CG1737
E2QD75	E2QD75	Cbp80
Q9VGN9	Q9VGN9	RpL24-like
Q9VBX3	Q9VBX3	vig2
Q7K5M2	Q7K5M2	CG10139
H0RNK7	H0RNK7	Rtf1
Q94517	Q94517	HDAC1
P20240	P20240	Ote
Q9VE51	Q9VE51	Cpsf73
E2QD65	E2QD65	RpS19a
Q9V9Z9	Q9V9Z9	CG1542
Q7JNE1	Q7JNE1	prod
Q9VPU8	Q9VPU8	dbe
Q9VLK1	Q9VLK1	CG13097
P20227	P20227	Tbp
Q9V426	Q9V426	vig
Q9VMM7	Q9VMM7	CG11030
Q9VM95	Q9VM95	Aatf
Q27268	Q27268	Hel25E
A1ZBW6	A1ZBW6	CG11180
Q9V9K7	Q9V9K7	Ars2
Q9VUB5	Q9VUB5	upSET
Q9VG84	Q9VG84	DNAlig3
Q9VM62	Q9VM62	SA
Q7KHK9	Q7KHK9	Strica
Q9VN55	Q9VN55	atms
Q9W1R5	Q9W1R5	vir
A0A0B4JD39	A0A0B4JD39	ttk
Q27294	Q27294	caz
Q9W3M7	Q9W3M7	mahe
Q9VKM7	Q9VKM7	CG33129
A1Z6M0	A1Z6M0	Bap170
Q9I7W5	Q9I7W5	Sas10
Q9W3B2	Q9W3B2	Rbm13
Q7K2D2	Q7K2D2	DCTN2-p50
B7Z120	B7Z120	Tlk
Q9V8R9	Q9V8R9	cora
Q961D1	Q961D1	CycK
Q9V4D4	Q9V4D4	bip2
Q9VZC8	Q9VZC8	CG15019
A1Z9S6	A1Z9S6	Su(var)2-HP2
Q95RQ8	Q95RQ8	pita
Q86B87	Q86B87	mod(mdg4)
A8DYD2	A8DYD2	cg
Q7KAH0	Q7KAH0	jim
Q9W363	Q9W363	mxc
A0A0B4LFL3	A0A0B4LFL3	eEF1beta
Q9VJH2	Q9VJH2	AspRS-m
A0A0B4KI32	A0A0B4KI32	cindr
A0A0B4JD46	A0A0B4JD46	CNBP
Q9VEX5	Q9VEX5	asun
Q9VVI1	Q9VVI1	CG7564
O46106	O46106	noi
Q9VWN4	Q9VWN4	Flacc
Q9VHM3	Q9VHM3	M1BP
Q9VPL0	Q9VPL0	CG3436
X2J6S0	X2J6S0	msl-1
D2NUK9	D2NUK9	hoip
P25171	P25171	Rcc1
P05205	P05205	Su(var)205
P35875	P35875	Parp
A1Z9K0	A1Z9K0	CG6701
Q709R6	Q709R6	bocks
Q9VYQ9	Q9VYQ9	Tango4
P52295	P52295	Pen
Q9VR99	Q9VR99	cactin
Q9V3P3	Q9V3P3	REG
A1Z6Q0	A1Z6Q0	koi
P38979	P38979	sta
Q9VHP9	Q9VHP9	Cenp-C
Q9W542	Q9W542	mip130
Q9VWQ6	Q9VWQ6	CG18259
X2JF59	X2JF59	Jafrac1
A0A0B4JDA0	A0A0B4JDA0	mor
Q7JRH5	Q7JRH5	CG5726
M9ND19	M9ND19	Gale
F6J1D0	F6J1D0	sqh
Q9VHT2	Q9VHT2	tex
Q8T4F7	Q8T4F7	ena
Q86BI3	Q86BI3	Zn72D
Q8SZ28	Q8SZ28	CG44250
M9NE89	M9NE89	Lam
Q9VBZ5	Q9VBZ5	Ythdf
Q9VHI1	Q9VHI1	hyx
O77410	O77410	eIF3e
Q9VDN4	Q9VDN4	CG4360
Q9W158	Q9W158	CG4612
Q9VE94	Q9VE94	CG18600
A0A0B4LH50	A0A0B4LH50	Act87E
Q9VXE6	Q9VXE6	Nup153
M9PBH8	M9PBH8	CG2199
Q7KU01	Q7KU01	PNUTS
Q9VX15	Q9VX15	CG8142
Q59E33	Q59E33	scaf6
Q9W2N6	Q9W2N6	CG9346
O97183	O97183	RpII33
Q9VYE9	Q9VYE9	CG1622
M9NH51	M9NH51	U2af50
O46048	O46048	east
Q86BS3	Q86BS3	Chro
Q9VB04	Q9VB04	btz
Q9VG78	Q9VG78	pps
A0A0B4LGW1	A0A0B4LGW1	sub
O46307	O46307	CG11417
Q95TS5	Q95TS5	IntS9
A0A0B4LHR3	A0A0B4LHR3	XNP
X2J8R0	X2J8R0	sip1
Q9VT61	Q9VT61	CG8108
G3M3A2	G3M3A2	RpS3
Q9U9Q1	Q9U9Q1	RfC38
Q8SWR8	Q8SWR8	Atx2
Q9W2U7	Q9W2U7	nocte
Q9VKD8	Q9VKD8	CG6686
Q7PLI2	Q7PLI2	Nipped-B
Q7K0L8	Q7K0L8	FLASH
Q9VPY0	Q9VPY0	IntS14
Q9V9V0	Q9V9V0	CstF50
Q9VPM5	Q9VPM5	mbm
Q9VEJ1	Q9VEJ1	SF1
Q9VV75	Q9VV75	UQCR-C2
M9PEJ2	M9PEJ2	Ist1
Q9W0T7	Q9W0T7	Dis3l2
Q9VYY7	Q9VYY7	HP5
Q9W424	Q9W424	Spx
X2JEM4	X2JEM4	RpS28b
