# Supplementary material for: The role of RNA in the maintenance of chromatin domains as revealed by antibody-mediated proximity labelling coupled to mass spectrometry
Source: eLife. 2024 May 8;13:e95718. doi: 10.7554/eLife.95718 (PMC11147508; doi:10.7554/eLife.95718)
Supplement: Supplementary file 12. [file elife-95718-supp12.xlsx]

## Sheet: CID Rnase protein
Primer	Forward (5' to 3')	Reverse (5' to 3')
Rox1	ATGAACACAGCCAAAGCAAG	GGCTCAGGCGTATAACGATT
Rox2	GACGTGTAAAATGTTGCAAATTAAG	TGACTGGTTAAGGCGCGTA
Actin	CAGAGCAAGCGTGGTATCCT	GTGTGGTGCCAGATCTTCT
4-G2	CCAATTGCGATGCGGTTCC	CTGCAGAGGTGGATGTTGTG
3-G2	TGAGAGTTCAGCATCCACTGC	AGGCAGGTAGTGGTTGAGTAG
R1	TAGAGCTTGTAGTGGTCGAG=	ATGGGTCGTCGGCATGATCT
2-G2	AACGGTATGCGAATAACGGAG	GTCTGAGCTCCAAAATGCCAAA
Hop	CTACAAGCAGGCGAAGGTTT	CTTGATCTCAGGGGTGCGAT
tRNAlys	GCCAAGCTCATTTTCTACGATCT	GTCCGACAACGCCGATGATA
Sdr	ACAGCTGATGTCGCTCACAT	CGCTGAATGATCACCAGGTGA
Mle_KD_1	TTAATACGACTCACTATAGGGAGAATGGATATAAAATCTTTTTTG	TTAATACGACTCACTATAGGGAGAACAGGGCGCATGACTTGCT
Mle_KD_2	TTAATACGACTCACTATAGGGAGAATTTCCCGTGCAGCAATTTT	TTAATACGACTCACTATAGGGAGAATCAATTACGAAAACAATGTCG
GST RNAi	TTAATACGACTCACTATAGGGAGAATGTCCCCTATACTAGGTTA	TTAATACGACTCACTATAGGGAGAACGCATCCAGGCACATTG
