# Supplementary figures and images for: The role of RNA in the maintenance of chromatin domains as revealed by antibody-mediated proximity labelling coupled to mass spectrometry
Source: eLife journal article supplement (doi:10.7554/elife.95718), 2024-05-08

# Figure 1-Supplement Figure 1(c)-source data (Chemiluminescence)

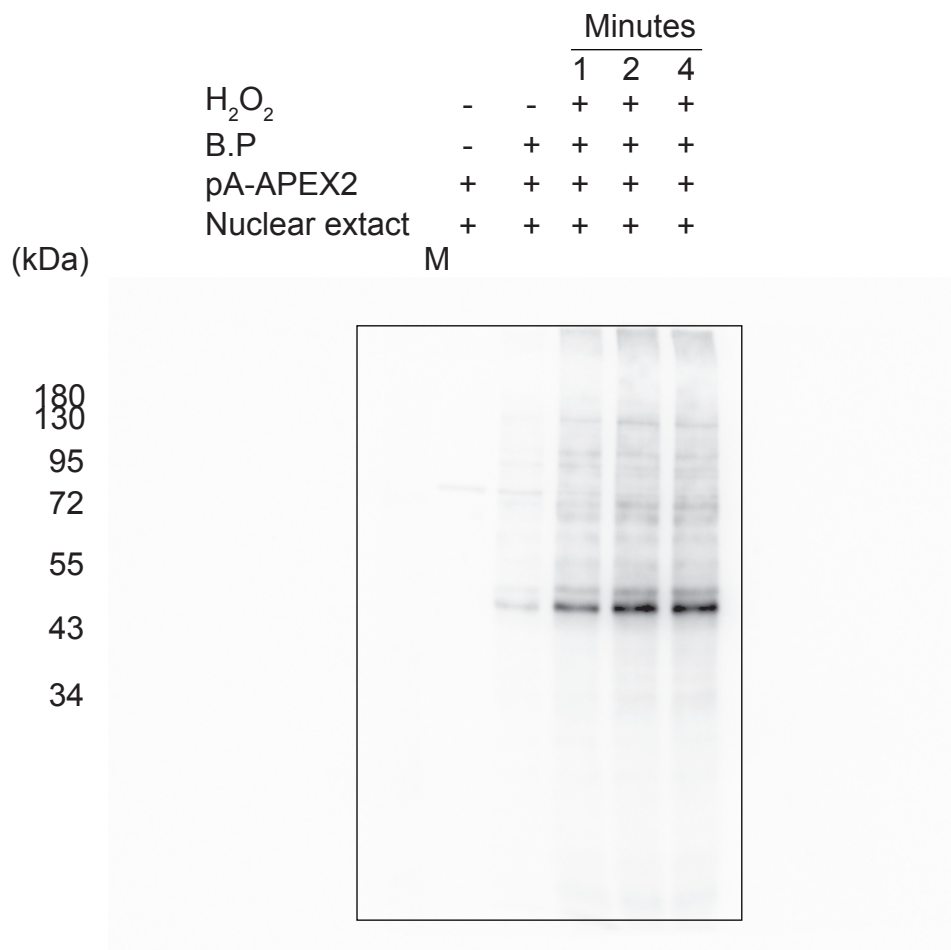

Supplement: fig1-figsupp1-data2 [file elife-95718-fig1-figsupp1-data2-v2.zip]

Figure 1-Supplement Figure 1(c)-source data  
(Colorimetric)

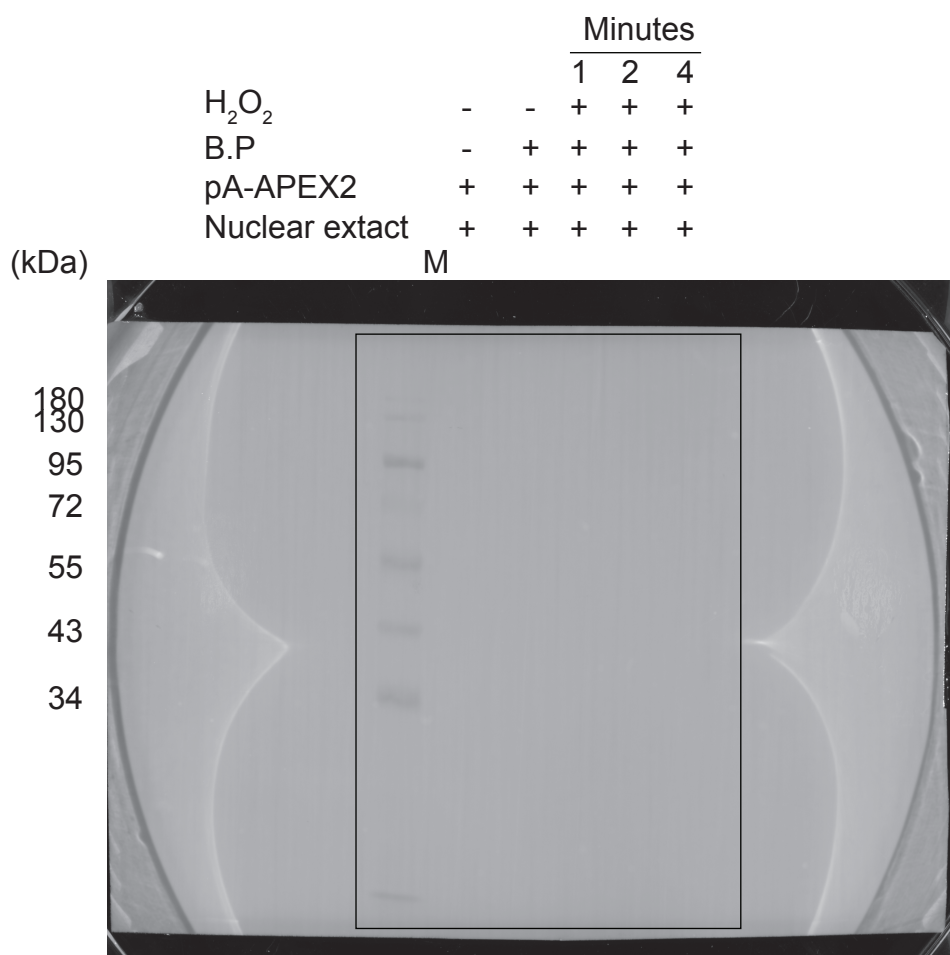

Supplement: fig1-figsupp1-data2 [file elife-95718-fig1-figsupp1-data2-v2.zip]

Figure 1-Supplement Figure 1(a)-source data

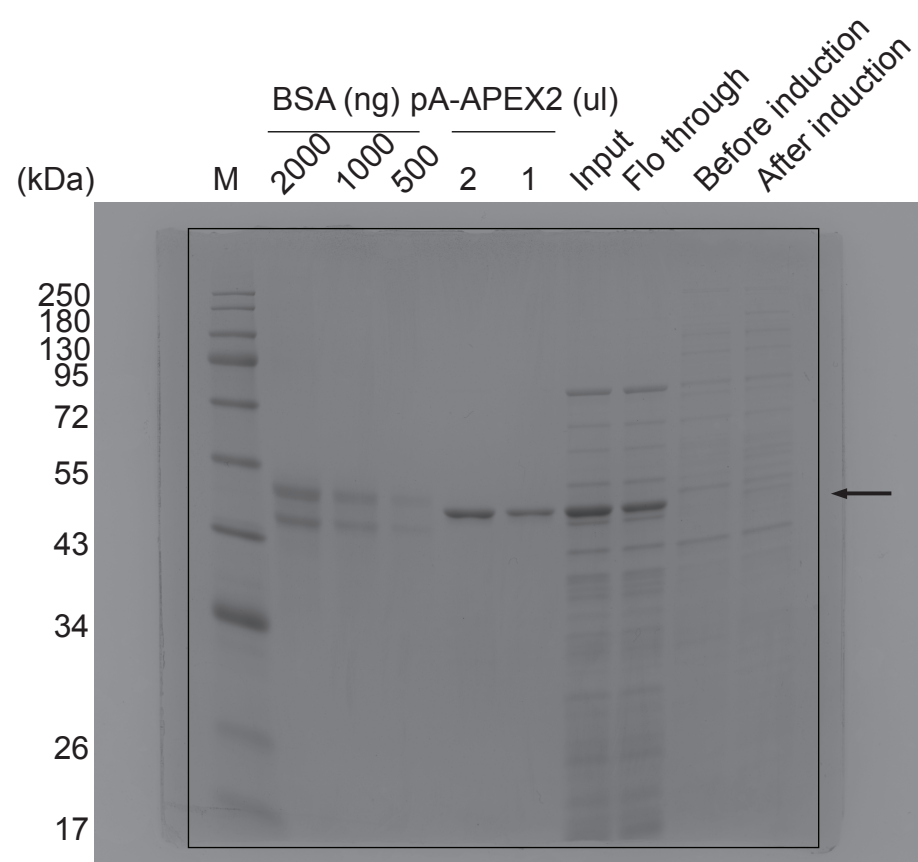

Supplement: fig1-figsupp1-data2 [file elife-95718-fig1-figsupp1-data2-v2.zip]

Figure 1-Supplement Figure 1(b)-source data  
(Chemiluminescence)

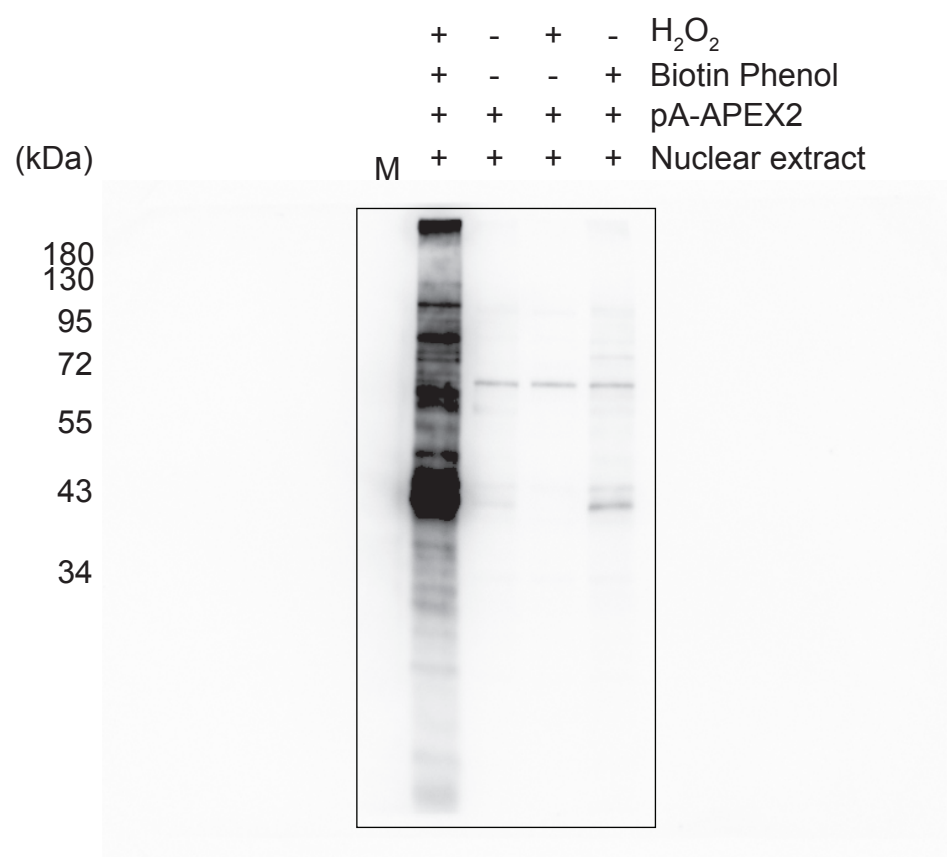

Supplement: fig1-figsupp1-data2 [file elife-95718-fig1-figsupp1-data2-v2.zip]

Figure 1-Supplement Figure 1(b)-source data  
(Colorimetric)

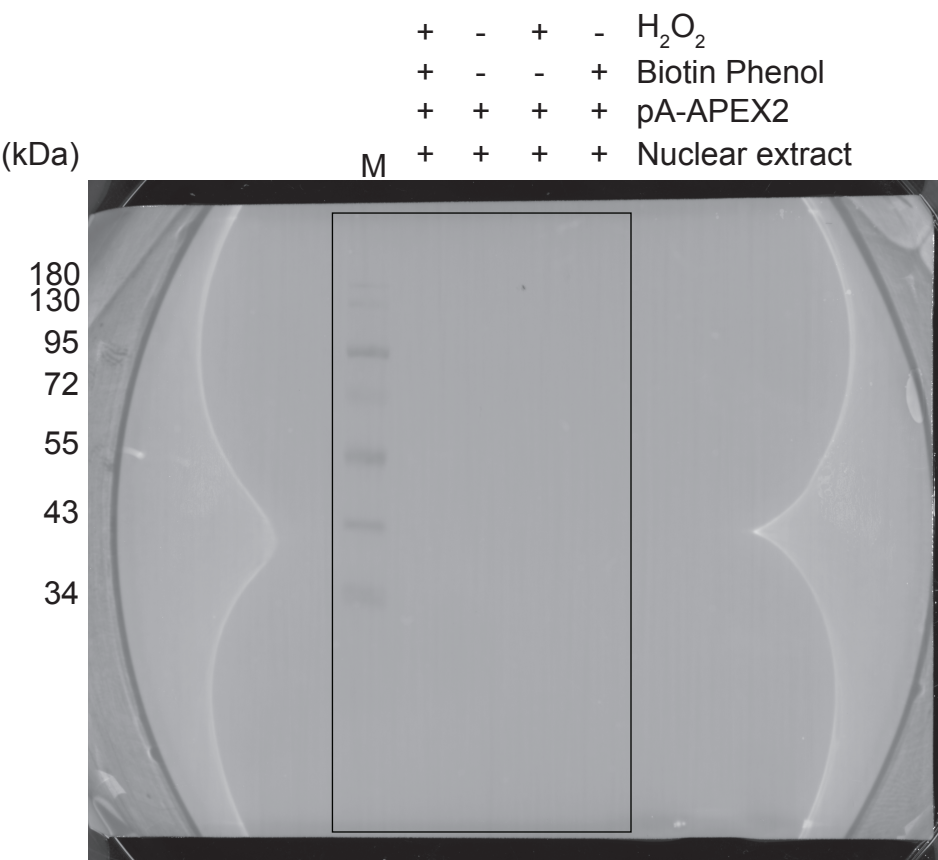

Supplement: fig1-figsupp1-data2 [file elife-95718-fig1-figsupp1-data2-v2.zip]

Figure 2-Supplement Figure 2(h)-source data  
(Coomassie Blue)

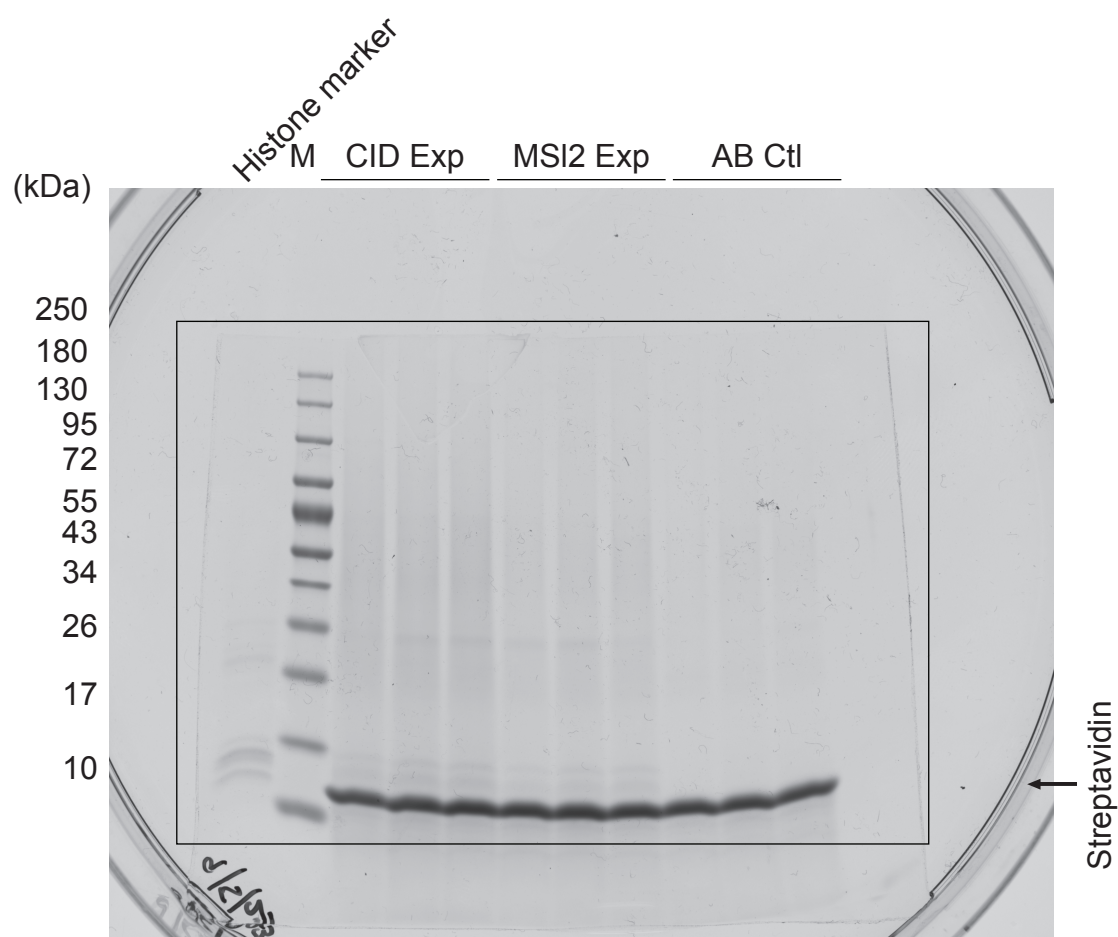

Supplement: fig2-figsupp1-data2 [file elife-95718-fig2-figsupp1-data2-v2.zip]

Figure 2-Supplement Figure 2(g)-source data  
(Coomassie Blue)

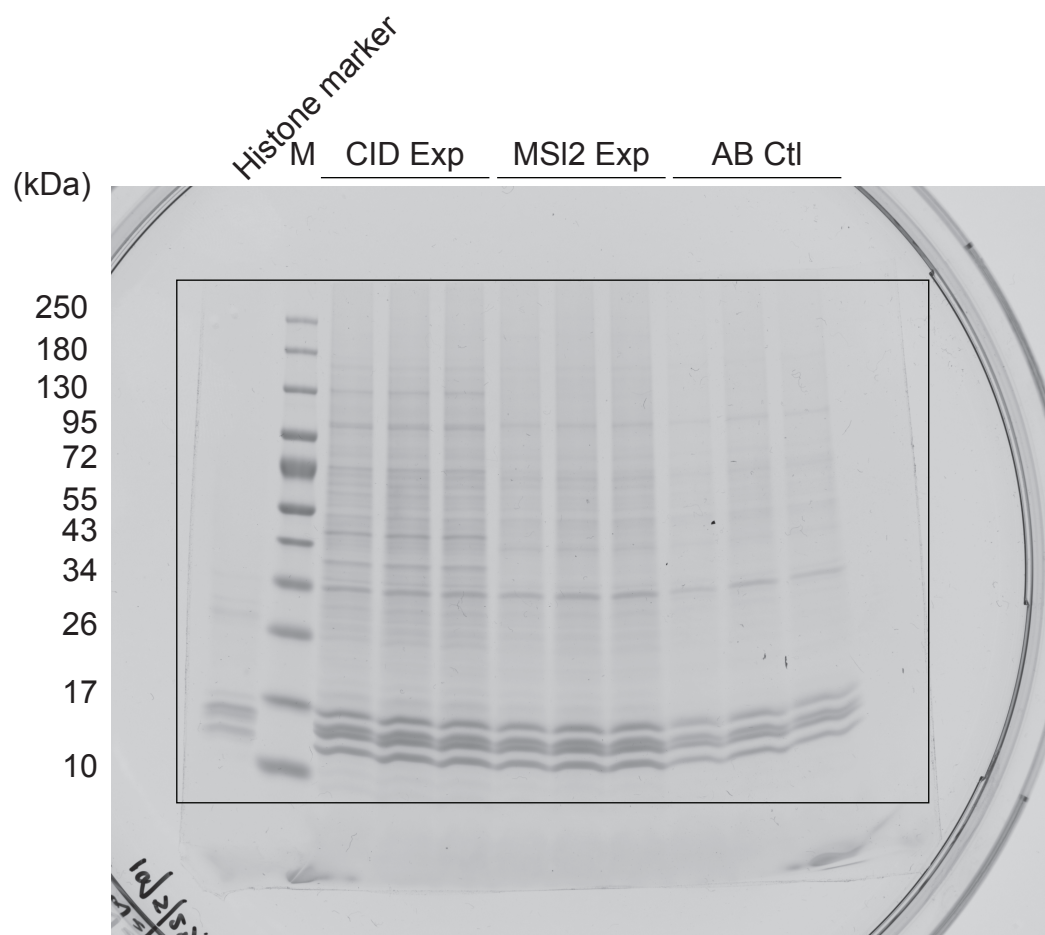

Supplement: fig2-figsupp1-data2 [file elife-95718-fig2-figsupp1-data2-v2.zip]

Figure 5-Supplement Figure 6(b)-source data  
((Colorimetric)

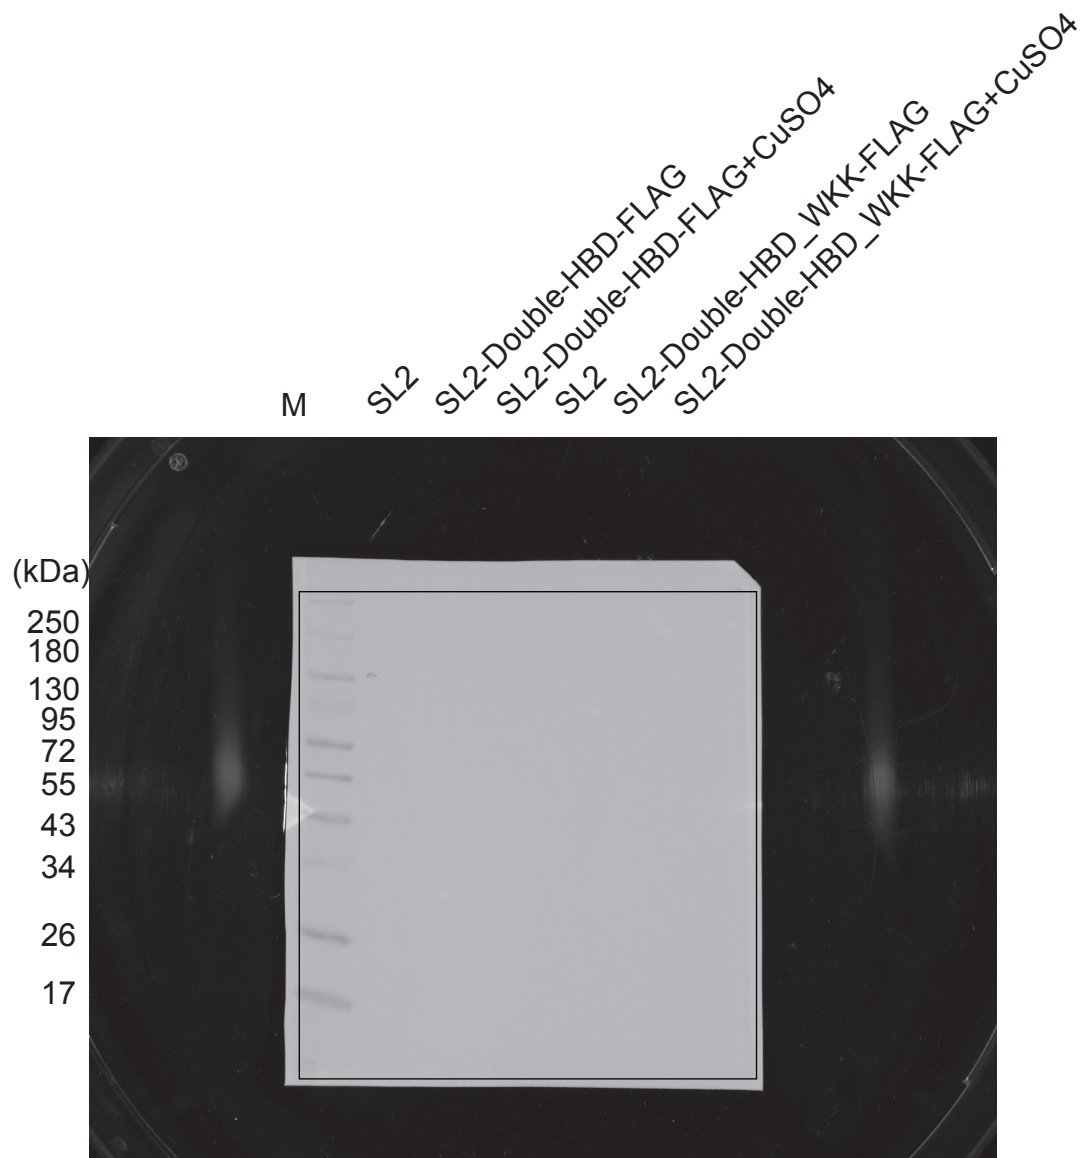

Supplement: fig5-figsupp1-data2 [file elife-95718-fig5-figsupp1-data2-v2.zip]

Figure 5-Supplement Figure 6(a)-source data  
(Colorimetric)

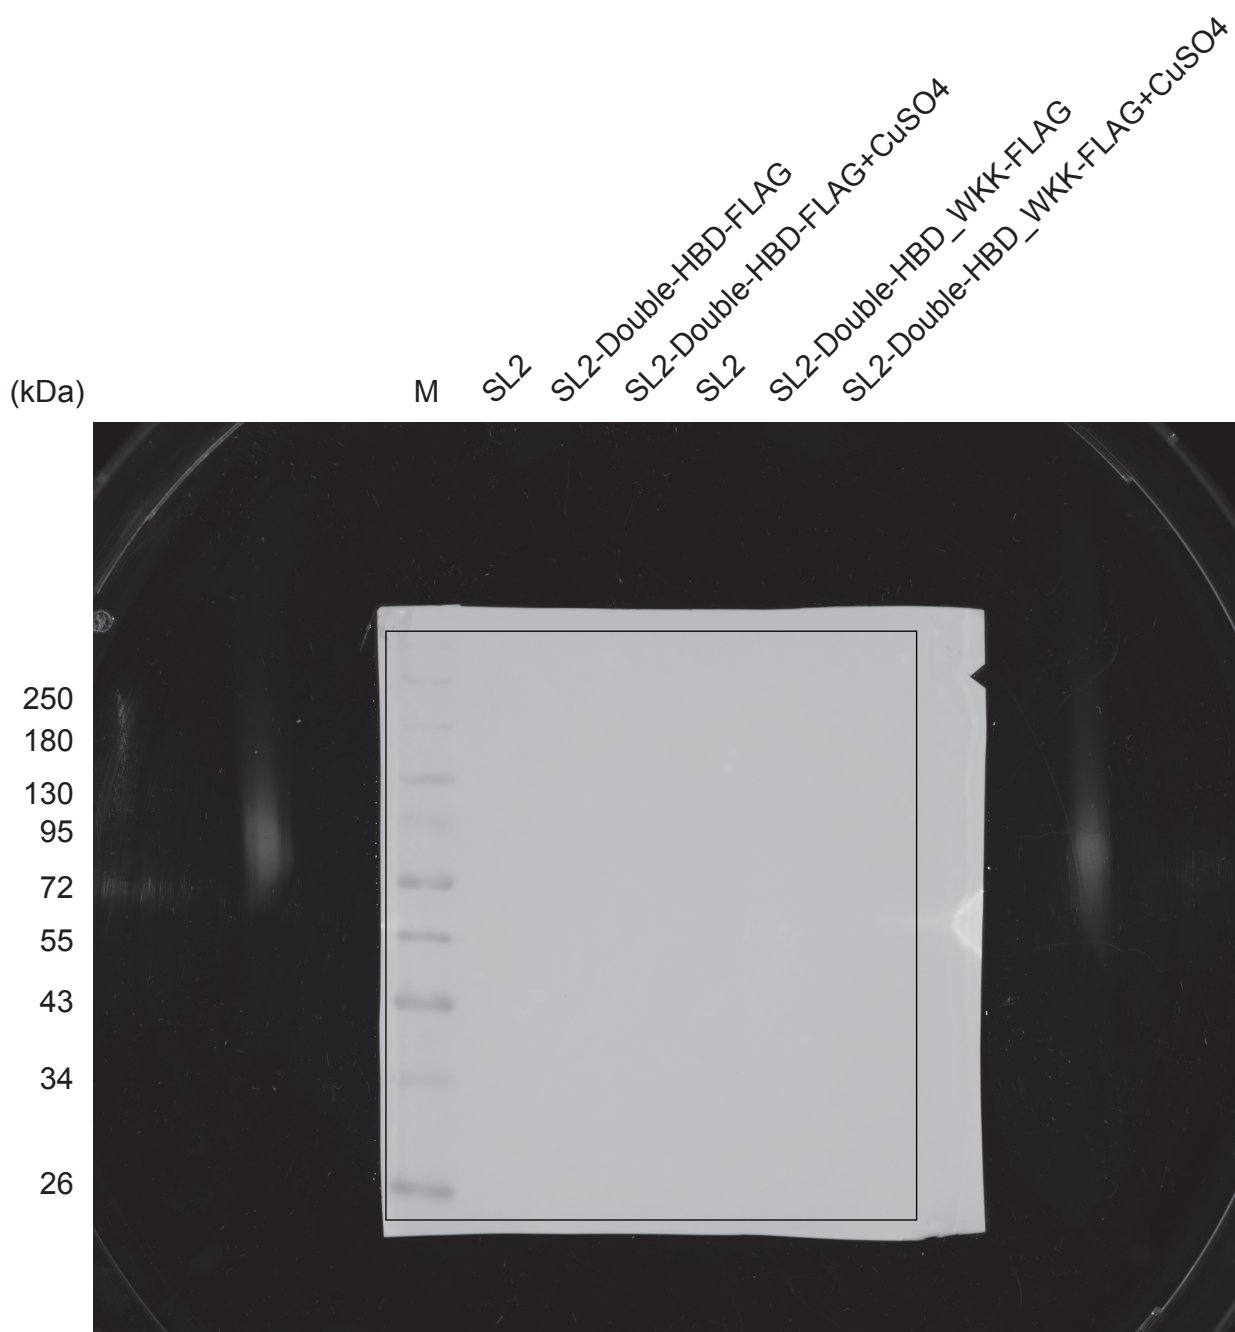

Supplement: fig5-figsupp1-data2 [file elife-95718-fig5-figsupp1-data2-v2.zip]

Figure 5-Supplement Figure 6(a)-source data  
(Chemiluminescence)

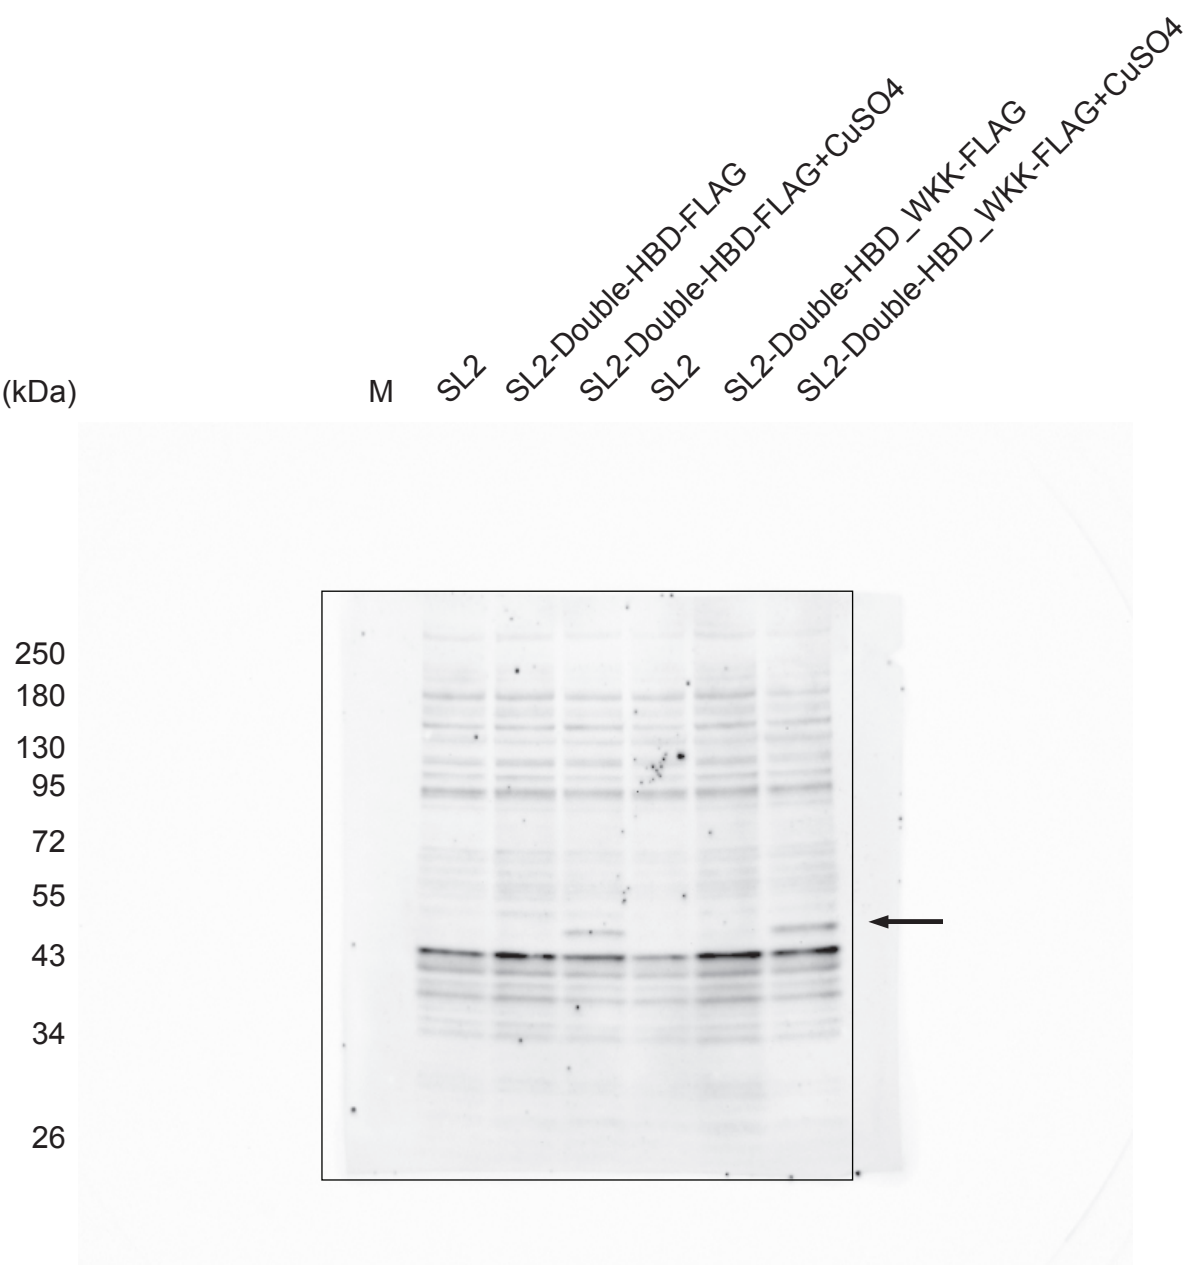

Supplement: fig5-figsupp1-data2 [file elife-95718-fig5-figsupp1-data2-v2.zip]

Figure 5-Supplement Figure 6(b)-source data  
(Chemiluminescence)

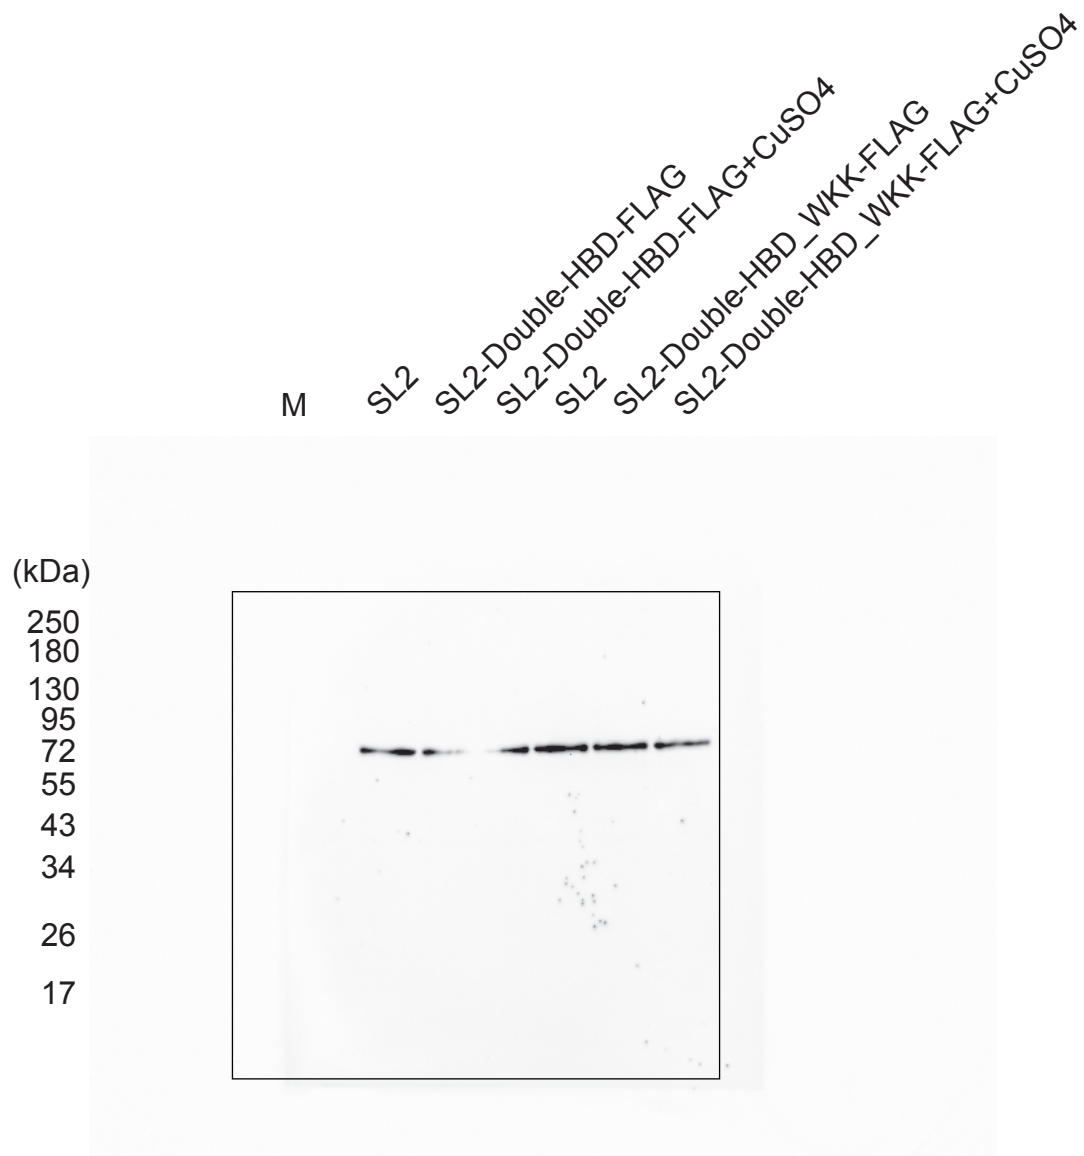

Supplement: fig5-figsupp1-data2 [file elife-95718-fig5-figsupp1-data2-v2.zip]
